# Supplementary material for: Assessment of the effects of cannabidiol and a CBD-rich hemp extract in Caenorhabditis elegans
Source: Front Toxicol. 2024 Oct 1;6:1469341. doi: 10.3389/ftox.2024.1469341 (PMC11484448; doi:10.3389/ftox.2024.1469341)
Supplement: Supplementary file 4 [file DataSheet1.xlsx]

## Sheet: wDAT ex1 tL
DATE:	2023-10-28 11:37:08
FILE:	C:\Software\WMicrotracker One\wmicrotracker_w8_v30api\wmicrotracker\p00031\20231024_1737
SUBPROJECT:	2023 1024-27 wDAT CBD twVC 300-750ug ex1 tL
<<<<<< Group Activity: Average Activity Counts per Data Interval>>>>>>
Group/Time[m]	30	60	90	120	150	180	210	240	270	300	330	360	390	420	450	480	510	540	570	600	630	660	690	720	750	780	810	840	870	900	930	960	990	1020	1050	1080	1110	1140	1170	1200	1230	1260	1290	1320	1350	1380	1410	1440	1470
000_0.1% Tw80	64	80	73	73	73	76	81	87	92	95	98	97	95	91	87	81	74	64	57	53	50	40	39	31	32	34	31	32	30	33	33	25	19	20	23	18	15	17	25	28	32	41	43	50	57	67	64	65	73
001_vehicle emulsion	58	77	75	73	72	80	83	92	93	95	92	86	82	79	76	73	64	61	55	53	48	46	43	43	40	39	38	40	34	33	38	35	33	30	23	18	19	19	21	24	29	37	46	51	57	63	62	62	69
002_300ug CBD pure	44	44	42	51	56	58	62	64	70	69	70	70	72	68	64	64	60	56	51	47	40	39	40	32	34	36	42	35	28	34	48	35	36	38	28	23	25	22	26	27	32	36	44	54	62	62	64	78	79
003_500ug CBD pure	42	28	30	29	32	27	33	34	35	34	38	41	38	40	40	46	45	48	42	38	29	34	38	38	32	36	28	30	34	30	26	31	35	36	26	25	21	19	19	17	14	15	20	22	32	42	40	50	62
004_750ug CBD pure	48	34	30	32	32	31	26	34	32	34	34	38	40	46	43	44	42	40	34	35	39	37	45	38	39	44	42	40	35	34	44	38	34	42	42	40	36	34	36	32	26	26	22	26	28	38	37	39	54
hours	2	2.5	3	3.5	4	4.5	5	5.5	6	6.5	7	7.5	8	8.5	9	9.5	10	10.5	11	11.5	12	12.5	13	13.5	14	14.5	15	15.5	16	16.5	17	17.5	18	18.5	19	19.5	20	20.5	21	21.5	22	22.5	23	23.5	24	24.5	25	25.5	26
<<<<<< Group Activity: Standard Error >>>>>>
Group/Time[m]	30	60	90	120	150	180	210	240	270	300	330	360	390	420	450	480	510	540	570	600	630	660	690	720	750	780	810	840	870	900	930	960	990	1020	1050	1080	1110	1140	1170	1200	1230	1260	1290	1320	1350	1380	1410	1440	1470
000_0.1% Tw80	4.6	1.2	4.6	5.8	5.8	8.7	8.1	8.1	8.1	4.6	4.6	5.2	5.2	3.5	5.8	7.5	7.5	6.9	3.5	4	2.3	7.5	3.5	4.6	2.3	7.5	4	1.7	1.7	3.5	2.9	2.9	3.5	1.7	2.3	1.7	1.7	3.5	6.4	9.2	10.4	11.5	9.2	9.2	8.7	5.8	4	4.6	1.7
001_vehicle emulsion	2.9	3.5	5.2	3.5	4.6	6.4	7.5	6.4	5.2	4	3.5	2.3	5.2	3.5	1.7	1.7	4.6	5.8	6.4	2.3	5.8	6.9	5.2	1.7	2.3	1.2	5.2	3.5	2.3	1.2	3.5	6.4	6.9	9.2	2.3	5.8	6.9	5.2	4.6	2.3	4	1.7	3.5	5.8	3.5	4	1.2	2.3	1.7
002_300ug CBD pure	3.5	0.7	3.5	0	3.5	3.5	2.8	0.7	2.8	2.8	5.7	1.4	0.7	0.7	0.7	4.2	4.2	1.4	4.2	2.8	4.2	2.8	11.3	1.4	2.8	1.4	4.2	0.7	4.2	4.2	12	2.8	3.5	0.7	0.7	2.1	0.7	0	2.8	2.8	9.2	4.9	2.8	5.7	4.2	4.9	2.8	3.5	5.7
003_500ug CBD pure	5.7	6.4	5.7	4.9	4.2	2.8	4.9	9.2	11.3	8.5	8.5	9.2	6.4	4.2	5.7	8.5	4.2	9.2	8.5	3.5	0	7.8	4.2	9.9	7.8	2.1	0.7	5.7	4.9	0.7	0.7	0.7	2.8	4.2	6.4	9.9	5.7	2.8	7.1	2.1	3.5	2.1	0.7	2.8	4.2	3.5	1.4	2.8	2.8
004_750ug CBD pure	3.5	4.2	4.2	0.7	0.7	0.7	4.2	5.7	5.7	1.4	1.4	0.7	5.7	2.8	0	1.4	1.4	2.8	3.5	2.8	2.8	0	7.1	4.2	2.1	1.4	4.2	4.2	0	4.2	1.4	4.2	0.7	1.4	4.9	1.4	1.4	1.4	2.1	3.5	1.4	8.5	0.7	4.9	10.6	11.3	7.1	9.2	6.4
<<<<<< Group Activity: Number of wells/group >>>>>>
Group/Time[m]	30	60	90	120	150	180	210	240	270	300	330	360	390	420	450	480	510	540	570	600	630	660	690	720	750	780	810	840	870	900	930	960	990	1020	1050	1080	1110	1140	1170	1200	1230	1260	1290	1320	1350	1380	1410	1440	1470
000_0.1% Tw80	3	3	3	3	3	3	3	3	3	3	3	3	3	3	3	3	3	3	3	3	3	3	3	3	3	3	3	3	3	3	3	3	3	3	3	3	3	3	3	3	3	3	3	3	3	3	3	3	3
001_vehicle emulsion	3	3	3	3	3	3	3	3	3	3	3	3	3	3	3	3	3	3	3	3	3	3	3	3	3	3	3	3	3	3	3	3	3	3	3	3	3	3	3	3	3	3	3	3	3	3	3	3	3
002_300ug CBD pure	2	2	2	2	2	2	2	2	2	2	2	2	2	2	2	2	2	2	2	2	2	2	2	2	2	2	2	2	2	2	2	2	2	2	2	2	2	2	2	2	2	2	2	2	2	2	2	2	2
003_500ug CBD pure	2	2	2	2	2	2	2	2	2	2	2	2	2	2	2	2	2	2	2	2	2	2	2	2	2	2	2	2	2	2	2	2	2	2	2	2	2	2	2	2	2	2	2	2	2	2	2	2	2
004_750ug CBD pure	2	2	2	2	2	2	2	2	2	2	2	2	2	2	2	2	2	2	2	2	2	2	2	2	2	2	2	2	2	2	2	2	2	2	2	2	2	2	2	2	2	2	2	2	2	2	2	2	2
<<<<<< Number of Samples per Acquisition Interval [1unit=500values] >>>>>>
Time[m]	30	60	90	120	150	180	210	240	270	300	330	360	390	420	450	480	510	540	570	600	630	660	690	720	750	780	810	840	870	900	930	960	990	1020	1050	1080	1110	1140	1170	1200	1230	1260	1290	1320	1350	1380	1410	1440	1470
#Samples	30	30	30	30	30	30	30	30	30	30	30	30	30	30	30	30	30	30	30	30	30	30	30	30	30	30	30	30	30	30	30	30	30	30	30	30	30	30	30	30	30	30	30	30	30	30	30	30	30
<<<<<< Average Temperature [°C] >>>>>>
Time[m]	30	60	90	120	150	180	210	240	270	300	330	360	390	420	450	480	510	540	570	600	630	660	690	720	750	780	810	840	870	900	930	960	990	1020	1050	1080	1110	1140	1170	1200	1230	1260	1290	1320	1350	1380	1410	1440	1470
Temp[°C]	22.6	22.6	22.6	22.6	22.6	22.8	22.8	22.8	22.8	22.8	22.8	22.8	22.8	22.8	22.8	22.8	22.8	22.8	22.8	22.8	22.8	22.8	22.8	22.8	22.8	22.8	22.8	22.8	22.8	22.8	22.8	22.8	22.8	22.8	22.8	22.8	22.8	22.8	22.8	22.8	22.8	22.8	22.8	22.8	22.8	22.8	22.8	22.8	22.8
<<<<<< Well Activity >>>>>>
Well	Group/Time[m]	30	60	90	120	150	180	210	240	270	300	330	360	390	420	450	480	510	540	570	600	630	660	690	720	750	780	810	840	870	900	930	960	990	1020	1050	1080	1110	1140	1170	1200	1230	1260	1290	1320	1350	1380	1410	1440
A1	000_0.1% Tw80	71	82	77	78	79	88	91	98	102	98	94	95	89	84	76	66	59	53	50	45	48	25	32	22	28	20	23	31	33	30	31	21	25	23	23	17	17	23	36	44	50	60	59	65	73	75	71	74
B1	004_750ug CBD pure	51	38	34	31	31	32	22	29	38	35	36	38	35	43	43	43	41	38	38	32	42	37	52	43	41	42	37	44	35	38	42	42	34	44	47	38	38	36	34	35	28	35	22	31	38	49	44	48
C1	003_500ug CBD pure	36	22	24	24	27	24	28	25	24	26	30	32	32	36	34	37	41	39	33	34	29	27	34	28	24	34	29	36	39	29	27	32	32	40	32	35	27	22	26	19	18	13	21	24	28	39	41	52
A2	001_vehicle emulsion	60	71	74	74	75	85	90	94	97	95	94	88	82	78	77	75	58	55	47	50	44	37	47	43	41	38	31	34	29	31	44	34	21	19	20	9	11	12	15	24	28	37	46	46	55	59	62	65
B2	000_0.1% Tw80	66	80	78	79	78	80	86	92	97	102	107	107	105	96	96	89	84	63	61	54	47	44	40	36	36	38	35	30	28	40	38	30	20	20	19	21	17	17	25	28	32	41	44	50	53	69	63	64
C2	004_750ug CBD pure	44	29	25	32	33	30	30	40	27	32	33	39	46	48	43	46	44	43	31	38	36	37	38	34	37	45	46	36	35	29	45	33	33	41	37	41	35	33	38	28	25	18	21	21	17	27	30	30
A3	002_300ug CBD pure	48	44	45	51	53	54	65	64	72	72	75	71	72	69	65	59	55	58	47	44	35	36	29	30	31	35	38	34	24	39	36	32	33	37	29	21	24	22	28	30	41	41	47	59	66	57	66	82
B3	001_vehicle emulsion	62	82	84	78	79	88	90	101	100	102	97	89	91	86	73	75	73	73	67	58	59	60	50	45	44	39	35	40	37	34	34	46	45	48	27	29	33	30	30	28	36	39	51	63	64	71	63	64
C3	000_0.1% Tw80	56	79	63	61	62	59	65	72	76	86	92	89	91	92	90	87	80	77	61	59	55	50	44	36	32	45	35	36	29	30	29	23	13	18	27	16	12	12	15	13	15	21	27	34	44	56	58	58
A4	003_500ug CBD pure	48	35	36	34	36	30	38	44	46	43	47	50	45	45	45	54	49	57	50	41	29	42	43	48	40	38	28	24	29	30	25	30	38	31	19	15	15	16	12	15	11	17	19	19	37	46	38	47
B4	002_300ug CBD pure	41	45	38	51	60	61	60	63	67	66	64	68	71	67	64	68	64	55	55	50	44	42	52	33	36	38	47	36	32	30	60	38	40	39	28	25	26	22	23	24	23	31	42	48	57	67	61	75
C4	001_vehicle emulsion	52	78	67	67	63	68	68	80	83	89	85	81	74	74	78	70	62	55	50	51	41	42	33	40	36	41	48	46	36	33	35	25	32	23	21	15	14	16	19	20	23	34	40	45	53	58	60	58
<<<<<< Channel Activity >>>>>>
Channel	Well	Group/Time[m]	30	60	90	120	150	180	210	240	270	300	330	360	390	420	450	480	510	540	570	600	630	660	690	720	750	780	810	840	870	900	930	960	990	1020	1050	1080	1110	1140	1170	1200	1230	1260	1290	1320	1350	1380	1410
CH17	A1.0	000_0.1% Tw80	61	42	0	0	0	43	47	45	80	79	80	106	81	88	88	87	99	71	128	81	130	34	22	9	22	23	21	34	9	9	63	25	81	51	78	26	22	26	29	31	28	34	35	27	71	86	79
CH18	A1.1	000_0.1% Tw80	39	39	60	53	70	78	73	81	88	91	63	72	81	83	59	66	62	57	18	10	58	10	6	20	106	56	23	17	10	1	1	8	2	8	14	20	1	7	21	5	5	34	24	25	20	36	26
CH23	B1.0	004_750ug CBD pure	54	28	50	40	31	2	8	0	0	0	0	0	0	0	0	0	0	0	0	0	0	0	0	0	0	0	0	3	0	0	0	0	0	0	0	0	0	0	0	0	0	0	0	0	0	0	0
CH24	B1.1	004_750ug CBD pure	42	9	17	49	27	31	0	0	16	3	3	9	38	16	7	0	2	8	19	5	11	2	13	2	8	24	4	28	27	0	15	3	4	11	13	11	2	15	7	1	0	6	2	3	7	47	17
CH29	C1.0	003_500ug CBD pure	20	26	22	24	24	26	33	19	14	18	11	2	25	6	5	13	18	14	6	10	2	11	31	20	9	21	8	39	113	43	29	15	12	27	22	7	5	20	16	11	7	9	1	16	35	50	48
CH30	C1.1	003_500ug CBD pure	20	30	27	8	17	7	23	8	5	12	6	29	5	25	46	11	16	15	4	19	12	0	2	16	25	16	53	10	4	2	6	14	26	19	22	5	16	18	18	10	9	12	6	15	37	57	45
CH32	A1.2	000_0.1% Tw80	130	128	56	65	28	41	27	37	23	29	27	34	30	26	19	18	14	6	11	11	8	0	3	2	1	1	1	1	0	0	0	3	0	0	0	0	0	1	0	0	0	0	0	0	0	1	3
CH33	A1.3	000_0.1% Tw80	79	67	59	63	62	52	64	77	85	76	85	78	68	66	45	44	35	24	20	6	10	7	2	7	0	0	0	4	0	0	4	2	0	0	4	0	0	0	2	10	12	43	20	35	9	45	53
CH34	A1.4	000_0.1% Tw80	75	73	59	62	63	85	74	105	92	92	62	88	92	78	42	37	36	20	15	11	1	9	4	2	3	2	4	0	2	0	0	0	0	0	0	2	0	0	6	3	13	17	5	13	11	23	20
CH35	A1.5	000_0.1% Tw80	56	89	95	95	124	127	145	123	118	126	96	93	99	73	52	44	56	49	51	39	12	19	21	14	23	2	7	2	0	0	0	0	0	1	0	4	1	7	2	11	16	21	17	27	53	42	15
CH38	B1.2	004_750ug CBD pure	60	113	51	17	9	44	0	0	0	0	0	0	0	0	5	6	0	13	3	4	1	0	3	0	2	0	0	0	12	2	1	0	1	45	17	5	2	14	6	13	1	2	0	11	25	56	41
CH39	B1.3	004_750ug CBD pure	42	3	22	27	21	16	28	36	15	9	24	14	5	22	21	4	0	4	9	13	1	5	43	14	5	3	0	2	9	17	0	6	0	0	0	0	6	0	0	0	0	0	0	0	0	6	2
CH40	B1.4	004_750ug CBD pure	46	29	28	8	23	13	10	25	20	9	0	15	16	0	8	10	10	20	27	38	5	4	14	12	0	0	2	5	14	28	17	25	0	2	12	0	14	0	4	0	0	0	1	11	2	0	0
CH41	B1.5	004_750ug CBD pure	19	15	11	18	19	6	3	13	8	6	10	41	10	35	15	28	49	11	6	23	26	1	39	11	48	5	4	24	3	3	6	19	3	5	1	0	0	0	0	2	3	0	6	17	32	16	16
CH44	C1.2	003_500ug CBD pure	30	31	19	31	24	42	25	45	4	2	13	5	5	3	4	0	4	2	13	8	10	1	5	1	3	0	1	0	0	0	3	0	42	9	7	9	3	8	4	1	1	0	0	2	3	20	17
CH45	C1.3	003_500ug CBD pure	70	16	16	42	27	31	29	25	33	8	12	28	27	34	18	33	27	35	15	10	8	25	3	14	0	0	8	6	8	2	7	7	10	15	4	0	0	0	3	0	3	1	2	4	1	3	10
CH46	C1.4	003_500ug CBD pure	17	21	8	30	48	22	6	10	30	41	41	27	27	35	22	37	22	25	16	25	12	13	0	41	9	26	71	39	28	22	1	24	3	37	9	5	0	0	1	9	0	0	2	6	0	21	0
CH47	C1.5	003_500ug CBD pure	23	9	11	15	21	13	30	18	18	42	19	56	28	33	34	37	66	45	73	25	8	16	45	17	65	60	13	3	20	8	7	18	50	98	25	61	60	28	12	19	10	5	8	13	26	45	35
CH48	A1.6	000_0.1% Tw80	72	81	74	61	29	34	58	63	71	88	93	94	103	87	82	87	48	39	15	15	45	7	6	0	0	4	0	15	11	43	8	2	0	1	6	6	2	3	15	6	20	18	25	43	49	56	74
CH49	A1.7	000_0.1% Tw80	79	61	70	56	56	61	75	76	75	82	103	85	83	54	49	29	28	11	14	8	14	5	0	3	7	3	0	0	0	0	3	0	0	4	6	0	2	4	18	7	19	38	39	47	29	39	37
CH50	A1.8	000_0.1% Tw80	83	86	91	88	96	97	108	138	128	110	105	85	87	83	51	37	17	20	36	20	7	2	19	33	5	4	3	3	0	0	3	0	0	9	9	1	4	1	11	15	12	21	24	32	37	40	42
CH51	A1.9	000_0.1% Tw80	83	111	99	136	130	152	144	150	133	118	114	122	103	98	93	65	46	64	20	26	39	18	15	6	3	6	8	6	3	3	0	0	0	0	0	0	4	2	4	5	33	34	29	37	57	44	28
CH52	A1.10	000_0.1% Tw80	96	153	149	139	171	197	195	176	137	141	171	155	155	140	146	128	143	115	104	147	146	92	168	75	61	57	26	97	122	83	28	3	2	2	2	5	5	11	24	40	63	85	66	70	105	124	83
CH54	B1.6	004_750ug CBD pure	76	94	50	64	51	59	39	39	77	62	55	39	14	30	40	43	59	64	48	30	27	8	32	30	1	7	14	21	16	3	6	28	20	0	19	8	1	0	24	15	0	21	1	6	2	9	1
CH55	B1.7	004_750ug CBD pure	69	93	62	51	37	24	37	21	52	27	78	51	29	42	90	66	22	50	10	18	32	20	69	12	57	21	13	13	17	7	4	7	1	0	45	34	0	0	3	0	2	0	0	5	0	5	9
CH56	B1.8	004_750ug CBD pure	56	55	75	26	61	34	36	11	12	40	42	23	12	25	10	54	79	52	39	33	27	54	32	70	14	84	42	34	8	8	16	15	7	57	78	31	39	25	4	23	35	13	2	11	6	7	8
CH57	B1.9	004_750ug CBD pure	41	4	9	20	41	15	8	26	38	28	42	44	24	29	47	44	64	45	25	14	23	17	55	22	32	18	7	13	29	43	32	22	16	38	54	36	13	0	6	11	5	10	0	8	3	18	9
CH59	C1.6	003_500ug CBD pure	29	13	7	21	34	24	29	19	14	10	16	9	30	45	28	34	55	51	43	41	45	41	32	51	41	24	35	59	44	16	19	21	9	16	8	29	2	2	0	0	10	2	9	0	7	12	15
CH60	C1.7	003_500ug CBD pure	20	32	8	7	19	16	25	18	14	22	16	35	11	30	16	19	18	41	22	28	37	44	60	41	15	22	33	17	8	5	2	2	1	1	0	5	3	10	0	0	2	0	0	3	2	1	9
CH61	C1.8	003_500ug CBD pure	38	45	57	14	42	34	27	37	58	34	40	41	40	94	38	26	42	32	29	51	19	18	42	17	34	20	21	27	1	6	20	19	24	8	13	4	1	8	8	2	7	2	2	7	15	27	19
CH62	C1.9	003_500ug CBD pure	36	10	11	25	17	18	13	44	16	25	26	38	27	51	56	62	51	56	46	54	24	31	30	30	45	35	24	16	12	5	9	30	12	9	5	0	7	15	7	16	12	6	8	1	5	3	2
CH63	C1.10	003_500ug CBD pure	40	17	16	48	29	20	35	33	32	63	46	61	50	41	38	80	69	83	60	55	45	71	76	62	30	102	38	22	70	83	26	77	53	60	9	19	1	0	0	1	2	2	10	2	9	18	6
CH64	A1.11	000_0.1% Tw80	48	46	39	22	30	31	32	42	71	55	56	79	77	81	95	62	80	81	50	50	32	7	16	0	5	4	9	3	3	2	4	5	1	9	6	17	3	4	10	18	37	38	46	54	72	52	94
CH65	A1.12	000_0.1% Tw80	59	66	90	96	77	83	78	99	112	118	109	106	102	86	63	44	44	41	26	19	10	8	2	6	8	1	27	20	0	3	3	1	5	14	17	6	2	4	10	29	32	44	65	56	72	72	64
CH66	A1.13	000_0.1% Tw80	81	98	96	120	106	115	129	121	142	117	98	102	75	73	68	63	45	33	42	25	12	6	4	14	2	0	14	5	13	0	5	0	4	2	2	1	0	0	10	32	48	50	49	49	86	91	65
CH67	A1.14	000_0.1% Tw80	67	102	101	110	109	130	135	144	143	132	123	126	96	104	115	82	63	55	97	70	80	49	80	76	76	59	67	103	88	43	49	3	5	21	30	9	15	51	30	57	81	121	126	132	151	113	136
CH70	B1.10	004_750ug CBD pure	55	47	65	58	53	61	51	72	100	48	25	71	51	59	22	56	73	58	82	39	68	62	52	117	31	81	39	63	58	27	113	43	125	82	19	15	49	17	10	2	5	0	0	32	38	7	60
CH71	B1.11	004_750ug CBD pure	70	26	30	65	20	77	36	64	68	72	46	62	54	93	63	52	80	48	55	27	86	65	106	43	58	12	48	52	28	28	27	59	20	19	20	33	40	41	34	15	0	1	7	5	44	110	29
CH72	B1.12	004_750ug CBD pure	25	7	10	17	43	46	2	45	42	39	79	66	55	67	93	81	51	47	65	57	74	83	63	31	63	109	90	89	48	104	39	9	52	62	55	53	61	51	60	89	43	54	7	0	15	27	24
CH73	B1.13	004_750ug CBD pure	55	28	14	7	41	24	41	63	44	91	60	39	105	111	136	86	65	99	141	83	136	96	128	126	132	85	117	153	141	123	138	160	104	144	163	162	196	172	154	103	71	176	98	56	96	116	127
CH76	C1.11	003_500ug CBD pure	75	11	17	20	0	5	1	0	0	0	0	0	0	0	0	0	0	0	0	0	0	0	0	0	0	0	0	0	0	0	0	0	0	0	0	0	0	0	0	0	0	0	0	0	0	0	0
CH77	C1.12	003_500ug CBD pure	57	17	35	30	15	29	33	43	27	34	50	68	51	41	64	67	79	52	53	61	41	30	62	32	29	35	41	89	29	19	29	17	16	37	25	8	0	18	70	13	8	5	43	31	6	8	18
CH78	C1.13	003_500ug CBD pure	44	39	79	32	73	56	84	50	65	41	96	58	91	70	87	87	95	83	72	86	76	39	49	48	28	77	52	75	71	39	30	41	25	56	60	101	4	23	8	15	20	0	6	63	16	12	45
CH79	C1.14	003_500ug CBD pure	21	26	33	33	47	47	67	36	69	61	90	53	101	86	106	101	105	95	93	81	109	86	114	62	59	114	79	144	109	135	143	154	118	125	122	164	134	61	135	71	49	58	94	82	118	125	133
CH81	A1.15	000_0.1% Tw80	55	67	87	58	74	67	88	69	131	104	124	106	82	100	121	118	90	89	94	115	140	65	100	53	76	38	82	50	63	117	168	170	176	150	81	43	61	56	171	240	208	205	226	223	228	226	198
CH82	A1.16	000_0.1% Tw80	48	82	85	94	118	99	81	123	111	105	87	92	92	112	112	109	105	125	108	118	75	88	78	56	77	73	99	174	231	201	180	141	152	119	131	157	166	216	241	247	231	219	214	228	199	190	191
CH87	B1.14	004_750ug CBD pure	42	26	24	11	17	15	8	7	44	46	59	96	84	77	73	68	43	29	12	22	43	47	65	68	79	93	69	56	53	115	116	121	59	108	88	85	56	55	70	107	103	105	100	138	103	110	110
CH88	B1.15	004_750ug CBD pure	58	23	24	13	9	42	47	36	72	74	54	39	63	75	65	83	56	61	74	106	110	131	118	129	128	123	137	143	93	97	148	152	140	134	171	142	135	185	159	172	172	176	123	196	231	245	252
CH93	C1.15	003_500ug CBD pure	56	30	29	28	24	2	7	0	0	0	0	0	0	0	0	0	0	0	0	0	0	0	0	0	0	0	0	37	122	83	103	82	122	123	146	110	153	113	89	89	80	74	66	22	60	108	160
CH94	C1.16	003_500ug CBD pure	11	1	6	3	6	17	8	21	14	25	25	28	22	17	23	18	25	29	18	26	43	35	20	32	19	25	21	23	21	26	23	28	29	38	75	65	77	48	76	67	94	51	105	136	136	152	136
CH113	A2.0	001_vehicle emulsion	45	53	37	23	17	23	10	18	12	7	8	1	3	0	1	0	1	0	0	0	0	0	0	0	0	0	0	0	0	0	0	0	0	0	0	0	0	0	0	0	0	0	0	0	0	0	0
CH114	A2.1	001_vehicle emulsion	69	73	72	85	62	93	88	80	110	112	107	102	86	79	120	54	75	56	29	30	27	18	18	10	14	4	0	34	11	20	18	28	0	0	2	0	0	0	0	10	27	44	94	13	34	6	23
CH115	A2.2	001_vehicle emulsion	37	43	68	65	88	75	76	76	79	80	86	78	77	67	59	60	87	73	45	25	29	27	30	7	10	15	7	6	8	24	53	42	74	28	17	10	7	22	15	16	8	15	12	19	43	69	61
CH118	B2.0	000_0.1% Tw80	37	0	0	0	0	0	0	0	0	0	75	106	104	101	106	73	80	51	36	35	33	25	52	44	2	34	10	7	2	2	21	3	1	5	0	0	1	3	0	5	1	22	23	30	38	39	49
CH119	B2.1	000_0.1% Tw80	60	63	57	110	95	53	52	56	74	92	103	77	80	95	60	80	62	53	48	32	22	20	7	5	16	40	26	11	7	7	8	2	8	17	14	7	5	20	11	18	12	12	16	26	48	69	75
CH120	B2.2	000_0.1% Tw80	30	51	62	61	70	56	87	71	105	89	100	99	71	75	73	61	41	16	32	55	23	11	6	11	6	3	10	7	9	6	12	1	0	5	13	3	0	6	5	1	2	9	12	9	13	33	26
CH121	B2.3	000_0.1% Tw80	37	118	139	146	136	151	152	130	137	120	134	117	121	107	99	139	105	131	109	88	64	29	86	11	18	25	16	34	9	15	21	12	5	8	41	79	0	2	8	3	3	11	11	26	30	48	29
CH124	C2.0	004_750ug CBD pure	37	21	1	0	0	0	0	0	0	0	0	0	0	0	0	0	0	0	0	0	0	0	0	0	0	0	0	0	0	0	0	0	0	0	0	0	0	0	0	0	0	0	0	0	0	0	0
CH125	C2.1	004_750ug CBD pure	21	7	19	14	17	27	13	29	3	5	8	26	33	10	4	43	5	5	2	13	11	7	0	0	0	5	3	0	11	0	6	3	3	7	9	5	3	14	19	5	0	3	2	5	13	31	21
CH126	C2.2	004_750ug CBD pure	36	24	11	33	33	51	31	19	16	16	25	5	0	44	11	7	13	19	9	17	19	20	3	8	18	43	34	22	10	11	0	0	0	21	1	2	9	4	1	0	0	0	9	1	0	3	1
CH128	A2.3	001_vehicle emulsion	67	65	76	61	45	44	54	70	53	52	60	75	74	63	65	85	35	45	51	157	50	48	121	75	151	151	20	21	12	15	20	18	12	27	30	7	13	20	25	13	10	13	18	32	42	79	63
CH129	A2.4	001_vehicle emulsion	68	58	43	51	44	56	57	72	90	101	104	94	61	68	49	74	61	33	28	31	15	5	55	57	41	54	77	11	3	55	46	37	11	13	19	2	1	1	3	29	4	15	18	9	26	9	10
CH130	A2.5	001_vehicle emulsion	47	58	50	46	53	62	72	66	99	87	118	97	69	76	65	62	46	31	19	17	15	3	5	6	23	8	16	10	2	4	10	0	3	1	4	6	0	1	1	7	10	15	14	25	5	13	6
CH131	A2.6	001_vehicle emulsion	54	69	93	107	94	104	133	137	134	118	126	118	142	117	118	82	69	57	51	36	45	69	127	107	24	19	13	32	3	6	7	3	1	0	2	0	0	14	2	2	22	10	10	14	34	58	50
CH132	A2.7	001_vehicle emulsion	40	83	96	79	89	123	90	90	76	68	69	59	56	47	60	50	36	42	35	49	34	42	24	38	59	38	20	20	21	25	2	8	4	1	1	10	31	41	7	10	17	7	55	18	18	54	26
CH134	B2.4	000_0.1% Tw80	92	83	51	48	38	28	55	52	93	79	82	94	94	79	90	72	47	59	62	7	9	11	5	0	5	30	19	4	0	4	104	96	3	2	8	2	2	3	15	16	6	21	17	13	29	38	28
CH135	B2.5	000_0.1% Tw80	65	53	25	27	45	42	60	81	67	96	80	82	81	54	60	60	58	25	19	28	47	50	9	43	5	11	0	10	4	4	4	4	6	9	10	5	2	16	10	5	8	5	8	30	21	44	29
CH136	B2.6	000_0.1% Tw80	53	71	88	69	56	78	77	89	87	119	94	111	96	76	95	87	77	39	24	38	38	34	33	36	27	1	13	14	15	157	60	9	11	4	0	8	0	7	3	2	3	7	11	13	7	18	30
CH137	B2.7	000_0.1% Tw80	70	89	99	113	99	138	127	124	99	114	118	99	107	99	76	88	79	71	37	27	43	48	18	17	17	30	17	8	14	7	5	29	20	46	20	0	3	4	0	10	11	8	19	20	32	32	16
CH139	C2.3	004_750ug CBD pure	34	20	13	41	23	17	22	65	6	15	38	11	21	32	12	44	33	24	9	14	30	27	10	13	35	43	19	16	8	52	26	20	2	4	0	11	15	11	0	0	0	0	0	1	0	0	0
CH140	C2.4	004_750ug CBD pure	58	15	20	26	30	24	5	23	28	39	25	23	30	40	11	46	38	26	1	36	27	12	9	1	17	12	17	13	9	18	5	4	24	5	3	0	5	0	10	0	0	0	0	0	0	0	0
CH141	C2.5	004_750ug CBD pure	38	42	46	14	32	32	25	81	27	20	26	23	51	30	41	23	16	10	19	26	13	21	10	42	12	30	30	10	16	11	53	12	42	27	9	19	10	20	17	42	28	42	6	6	8	50	22
CH142	C2.6	004_750ug CBD pure	38	49	12	40	32	24	63	25	20	12	49	59	49	64	48	33	59	33	25	32	23	32	68	31	6	59	40	5	22	38	40	17	10	10	32	10	17	1	14	0	2	0	1	0	0	2	1
CH143	C2.7	004_750ug CBD pure	23	9	22	37	34	26	4	33	9	24	40	46	77	57	69	41	45	17	17	30	35	51	48	49	15	41	59	45	26	6	7	2	8	8	39	7	8	13	0	0	2	0	0	14	0	2	0
CH144	A2.8	001_vehicle emulsion	73	79	70	74	69	82	98	101	99	95	70	73	66	62	92	78	29	31	46	40	40	25	15	10	2	4	8	23	2	0	15	23	14	19	37	20	62	18	46	61	29	42	31	44	50	38	55
CH145	A2.9	001_vehicle emulsion	62	60	53	50	40	38	52	87	76	88	69	78	69	63	49	39	49	29	21	7	15	9	15	27	2	2	6	8	22	5	0	2	1	0	3	3	6	7	7	6	9	10	10	12	19	18	22
CH146	A2.10	001_vehicle emulsion	65	55	84	61	89	105	119	109	130	119	126	129	95	107	74	90	43	49	33	18	28	15	13	7	7	3	6	6	6	18	56	7	0	12	10	0	0	2	0	8	14	39	21	41	67	50	43
CH147	A2.11	001_vehicle emulsion	108	126	127	127	120	142	159	160	129	155	133	114	149	140	118	94	67	119	97	82	99	61	33	73	27	41	28	63	96	50	54	73	15	0	0	4	2	0	10	15	19	20	33	45	88	59	104
CH148	A2.12	001_vehicle emulsion	84	98	113	114	113	150	152	119	107	108	100	93	92	82	93	120	93	70	82	57	104	75	96	49	74	59	64	61	60	30	13	62	57	19	22	10	14	10	16	33	45	61	74	72	94	88	126
CH150	B2.8	000_0.1% Tw80	75	74	87	45	46	58	59	75	111	104	82	91	83	91	98	79	75	42	46	8	19	23	12	19	9	6	4	0	4	4	0	6	1	5	9	4	6	3	45	4	22	16	56	21	37	55	28
CH151	B2.9	000_0.1% Tw80	121	89	87	44	64	69	74	87	82	129	119	99	116	67	70	79	35	39	31	53	62	73	26	4	10	38	30	51	11	7	2	0	0	5	0	2	0	1	8	14	50	23	15	17	24	31	49
CH152	B2.10	000_0.1% Tw80	59	78	56	68	70	73	89	97	89	119	99	89	76	95	94	67	74	58	74	57	25	22	18	20	15	9	8	6	12	31	13	4	2	15	17	3	4	10	15	8	13	24	24	39	30	56	37
CH153	B2.11	000_0.1% Tw80	76	110	107	114	120	129	133	160	144	112	124	140	131	123	112	112	126	103	98	90	83	47	38	36	30	31	42	26	55	48	34	12	6	7	2	7	2	2	10	10	15	20	35	37	51	86	99
CH155	C2.8	004_750ug CBD pure	45	18	12	24	14	18	19	21	18	26	20	15	18	13	63	27	45	39	10	38	23	36	19	16	37	29	15	28	16	14	29	4	5	15	18	33	3	12	20	26	18	13	40	25	11	0	4
CH156	C2.9	004_750ug CBD pure	56	43	61	36	47	49	73	92	77	38	24	34	24	15	25	13	27	24	12	7	48	19	17	14	59	49	14	11	13	47	6	39	3	43	10	17	18	18	0	3	0	0	4	0	4	4	2
CH157	C2.10	004_750ug CBD pure	45	32	31	29	36	14	18	40	53	49	20	56	47	28	20	21	52	57	31	20	11	24	39	19	49	25	29	43	18	0	9	25	13	46	11	17	6	25	11	14	12	4	5	7	9	35	42
CH158	C2.11	004_750ug CBD pure	72	27	22	51	24	5	41	20	4	54	39	57	102	81	94	82	37	43	30	53	66	43	60	20	58	62	86	29	33	34	9	26	67	58	28	35	19	18	21	88	79	4	2	24	6	17	20
CH159	C2.12	004_750ug CBD pure	57	50	47	69	18	29	32	38	24	27	30	36	60	56	42	31	57	58	70	89	96	46	84	91	64	88	43	48	61	78	119	55	77	88	42	35	86	24	28	29	32	15	12	4	0	3	4
CH160	A2.13	001_vehicle emulsion	29	54	28	20	37	28	39	47	73	65	75	58	54	41	56	51	38	36	23	38	40	18	35	16	19	6	16	48	27	3	3	0	1	1	0	1	0	2	13	11	14	23	36	36	20	47	32
CH161	A2.14	001_vehicle emulsion	59	82	69	86	84	86	79	114	103	97	87	75	73	100	73	115	58	65	52	87	73	42	63	38	19	8	3	5	1	14	192	69	0	2	0	1	3	1	6	8	23	22	35	34	77	55	42
CH162	A2.15	001_vehicle emulsion	46	74	76	86	89	118	124	136	161	146	134	143	118	104	114	103	113	81	58	43	30	36	26	51	44	69	76	44	44	75	72	41	28	67	5	25	0	4	14	53	73	107	113	167	128	168	202
CH163	A2.16	001_vehicle emulsion	60	75	110	129	138	117	126	116	113	112	127	109	106	115	111	115	89	115	135	126	112	136	115	159	185	163	160	182	180	181	180	163	135	126	190	54	42	62	84	131	148	189	203	198	190	187	192
CH166	B2.12	000_0.1% Tw80	109	126	91	90	72	76	75	94	110	88	116	114	116	116	153	80	110	78	92	96	68	47	88	10	79	86	30	16	9	10	5	3	3	0	0	64	47	6	7	26	23	62	60	95	74	83	71
CH167	B2.13	000_0.1% Tw80	47	69	61	68	68	81	60	79	111	109	103	106	116	91	62	97	77	58	70	47	42	62	21	85	68	19	9	17	16	5	9	36	12	0	1	2	6	0	4	19	21	56	62	77	67	94	109
CH168	B2.14	000_0.1% Tw80	56	93	98	125	122	106	131	135	122	139	144	147	126	110	120	104	127	71	59	71	41	21	62	46	58	50	99	57	72	108	110	75	46	5	17	8	10	18	59	77	84	120	109	130	121	135	111
CH169	B2.15	000_0.1% Tw80	67	121	134	141	150	136	149	142	126	130	132	139	161	155	166	140	165	116	140	135	133	174	167	185	203	195	221	204	211	217	198	192	192	181	147	136	182	171	195	222	233	236	233	221	230	245	217
CH172	C2.13	004_750ug CBD pure	57	85	70	43	70	72	65	79	32	69	80	98	55	57	27	80	99	147	100	64	32	59	81	69	57	35	114	49	66	24	58	97	52	87	118	163	81	37	82	42	4	15	71	77	86	108	74
CH173	C2.14	004_750ug CBD pure	62	9	5	45	62	68	60	36	51	75	51	68	59	97	109	57	56	32	43	24	25	47	31	61	41	18	61	46	69	45	127	43	29	24	77	65	81	57	82	0	51	22	41	40	14	18	53
CH174	C2.15	004_750ug CBD pure	38	25	31	31	42	49	31	81	60	71	68	72	97	122	102	135	99	142	84	149	89	101	63	72	103	113	108	149	115	30	154	105	119	135	111	128	69	123	154	97	63	54	93	48	38	31	105
CH175	C2.16	004_750ug CBD pure	33	20	3	7	49	11	16	1	23	12	17	26	54	62	57	99	68	58	67	39	65	83	97	66	64	112	116	93	100	86	125	109	112	121	128	146	169	182	194	133	139	138	78	103	107	159	162
CH208	A3.0	002_300ug CBD pure	125	96	93	75	65	56	54	48	54	44	81	75	81	80	70	50	38	66	54	46	44	59	43	15	47	67	53	33	27	17	6	13	8	16	30	13	29	5	13	1	0	2	9	2	0	1	11
CH209	A3.1	002_300ug CBD pure	37	43	36	44	57	36	58	51	92	72	71	38	64	67	79	48	27	30	28	37	47	28	18	17	0	3	9	53	2	10	1	71	0	4	0	0	2	0	0	10	15	7	1	32	0	20	5
CH210	A3.2	002_300ug CBD pure	37	42	5	32	29	35	45	58	35	37	49	47	46	32	25	23	37	27	44	24	24	18	6	21	29	1	5	7	3	0	4	1	8	15	0	4	50	15	17	4	8	6	3	0	17	5	0
CH211	A3.3	002_300ug CBD pure	21	16	11	9	26	20	61	43	31	36	47	36	29	33	36	47	31	27	18	75	23	22	30	16	20	21	29	12	22	6	19	6	12	45	57	29	11	26	47	17	14	37	43	21	58	78	62
CH214	B3.0	001_vehicle emulsion	112	102	89	51	41	49	50	76	75	73	84	72	90	70	74	83	158	157	121	84	103	141	56	63	86	111	35	32	16	14	14	11	0	16	8	4	9	9	18	10	10	24	20	79	88	84	121
CH215	B3.1	001_vehicle emulsion	34	60	30	34	47	71	58	62	63	69	66	52	53	50	32	20	39	46	12	11	16	20	6	16	10	10	6	6	24	2	5	2	0	0	6	2	0	4	9	7	9	0	0	8	9	16	24
CH216	B3.2	001_vehicle emulsion	52	77	77	82	84	101	96	95	83	100	96	69	61	84	66	65	40	29	32	20	39	13	29	35	17	13	14	3	5	10	8	22	2	2	0	0	0	1	6	4	23	4	5	9	5	15	12
CH217	B3.3	001_vehicle emulsion	52	99	105	87	129	88	113	104	91	96	71	74	78	81	65	66	60	40	55	43	47	50	40	25	28	24	3	12	7	12	24	85	216	129	73	113	74	26	12	8	7	15	36	103	99	55	39
CH220	C3.0	000_0.1% Tw80	104	93	36	2	0	1	0	50	54	69	72	73	94	85	83	78	68	78	58	40	12	48	12	15	37	23	30	111	89	100	55	22	20	57	91	33	11	27	37	24	27	20	29	35	49	89	76
CH221	C3.1	000_0.1% Tw80	48	78	50	35	26	38	23	43	63	61	78	74	48	76	70	64	72	25	42	22	13	38	34	27	3	0	1	1	3	7	0	2	4	16	46	2	17	20	18	2	5	6	9	8	20	5	8
CH222	C3.2	000_0.1% Tw80	41	53	76	73	58	55	63	77	70	80	101	111	97	72	101	70	50	39	40	33	18	31	14	15	10	25	79	74	73	91	44	3	5	9	15	4	7	14	21	21	4	18	11	25	23	43	48
CH223	C3.3	000_0.1% Tw80	35	102	99	104	107	106	108	116	120	134	112	104	94	91	100	88	51	51	38	32	13	31	60	17	13	12	3	17	18	15	13	87	3	26	109	57	5	13	5	8	13	14	18	14	17	5	23
CH224	A3.4	002_300ug CBD pure	39	52	93	71	88	75	54	51	45	36	37	65	96	78	93	43	75	88	37	19	5	47	31	21	13	21	66	69	42	109	29	10	32	107	20	20	20	29	71	80	173	195	157	125	102	115	100
CH225	A3.5	002_300ug CBD pure	39	20	31	53	72	47	43	41	49	34	62	58	37	40	44	54	56	33	21	5	12	10	1	0	10	24	24	15	5	0	8	4	0	8	0	2	0	1	5	6	0	16	5	24	2	16	46
CH226	A3.6	002_300ug CBD pure	124	64	26	44	34	46	68	56	72	88	66	34	88	66	60	63	47	39	25	41	29	29	47	1	22	1	2	7	3	7	15	30	48	8	12	1	2	6	8	1	2	6	13	68	68	25	40
CH227	A3.7	002_300ug CBD pure	48	40	35	50	74	44	51	71	85	85	92	81	51	56	51	45	62	21	41	26	31	58	27	35	20	46	17	32	16	45	20	0	17	3	2	2	0	2	1	21	59	12	13	34	35	8	12
CH228	A3.8	002_300ug CBD pure	21	28	49	18	75	60	84	73	77	62	56	66	43	30	48	41	21	46	18	11	37	50	6	21	49	11	12	0	9	24	10	12	1	0	2	1	4	1	24	33	45	35	17	21	12	12	25
CH230	B3.4	001_vehicle emulsion	46	47	39	26	19	41	52	86	72	92	64	73	69	56	42	42	28	13	19	35	45	98	35	9	33	13	45	76	27	18	8	72	15	9	14	7	14	3	42	48	8	19	9	16	13	37	54
CH231	B3.5	001_vehicle emulsion	85	48	59	81	51	74	95	106	114	82	105	90	94	59	101	64	36	42	53	21	22	8	24	8	4	14	4	9	8	2	37	84	75	146	5	2	5	6	2	22	1	5	14	11	21	59	8
CH232	B3.6	001_vehicle emulsion	52	61	80	63	56	49	52	87	75	80	76	58	83	68	44	44	54	49	47	29	20	6	1	27	14	17	6	7	4	7	10	16	4	18	21	2	4	12	19	12	7	3	23	29	22	52	49
CH233	B3.7	001_vehicle emulsion	78	132	137	140	115	150	126	131	147	131	122	92	82	100	91	91	55	44	58	111	94	55	45	41	50	32	13	2	9	0	5	20	6	79	1	0	4	1	2	5	18	13	8	28	16	24	14
CH235	C3.4	000_0.1% Tw80	40	46	17	16	11	18	28	29	20	44	65	63	65	63	65	77	68	73	84	33	63	54	9	3	8	10	8	10	4	4	3	0	1	4	8	4	3	2	5	4	24	21	26	47	32	73	51
CH236	C3.5	000_0.1% Tw80	64	73	29	26	33	31	49	35	31	51	61	50	55	49	58	60	39	57	31	23	37	32	5	14	15	2	4	7	15	2	5	8	5	6	0	12	3	1	0	4	0	9	12	13	12	17	21
CH237	C3.6	000_0.1% Tw80	78	86	41	35	51	50	64	66	62	96	84	96	78	103	114	70	87	85	64	55	21	19	27	26	18	2	12	19	5	9	4	4	1	5	4	22	0	5	6	7	0	4	12	16	20	21	38
CH238	C3.7	000_0.1% Tw80	79	96	82	62	91	79	90	89	93	112	90	116	107	97	97	80	64	51	45	37	22	35	39	44	23	16	8	52	22	12	16	0	2	4	2	2	7	1	5	9	1	3	14	11	12	23	37
CH239	C3.8	000_0.1% Tw80	60	107	114	135	143	120	114	135	149	128	138	120	116	114	87	77	67	77	33	46	32	40	33	27	13	139	40	15	10	7	10	9	27	18	22	14	22	25	17	36	9	10	17	23	38	73	57
CH240	A3.9	002_300ug CBD pure	57	71	64	116	83	101	88	51	72	129	111	117	110	110	98	102	102	134	97	81	76	37	23	14	20	4	30	9	13	29	31	11	131	16	8	0	52	0	6	10	11	42	52	32	63	91	116
CH241	A3.10	002_300ug CBD pure	48	48	45	35	52	54	73	48	66	72	74	74	73	98	98	47	50	49	33	53	20	2	28	34	18	28	9	11	9	0	22	68	2	21	6	0	0	0	0	0	0	9	17	22	63	30	69
CH242	A3.11	002_300ug CBD pure	44	31	52	58	38	72	66	37	79	74	63	78	67	70	33	106	55	54	64	50	39	18	20	27	16	42	42	9	2	45	73	10	1	3	0	8	4	5	0	8	8	13	8	37	58	18	78
CH243	A3.12	002_300ug CBD pure	24	43	35	39	47	75	46	101	88	91	67	82	94	79	66	85	57	33	41	33	26	37	18	9	8	44	53	60	50	22	55	15	4	7	4	0	7	0	6	55	33	24	35	85	50	61	36
CH244	A3.13	002_300ug CBD pure	32	29	54	39	20	38	98	90	69	70	93	74	70	68	55	38	42	49	44	59	86	36	30	27	11	48	38	22	26	4	8	7	0	2	6	0	1	2	15	18	12	22	28	41	46	61	51
CH246	B3.8	001_vehicle emulsion	72	76	48	38	55	64	74	103	93	101	93	67	94	106	62	54	30	75	35	19	26	73	111	23	30	32	8	2	21	10	28	8	8	17	13	3	19	21	9	6	10	22	15	32	21	37	30
CH247	B3.9	001_vehicle emulsion	70	78	57	70	52	58	58	84	94	104	98	102	106	105	101	52	54	40	36	40	46	46	29	41	4	2	2	0	16	12	2	20	6	2	22	89	165	80	33	29	28	18	27	19	41	70	18
CH248	B3.10	001_vehicle emulsion	80	103	97	103	99	105	131	103	116	118	128	126	148	114	93	142	127	103	119	64	50	55	48	31	50	6	21	50	7	3	6	3	0	3	2	0	0	6	4	13	9	22	26	37	45	52	34
CH249	B3.11	001_vehicle emulsion	65	104	116	97	125	147	156	142	140	156	126	127	104	107	86	75	99	85	101	101	109	66	78	57	73	47	53	63	82	37	42	43	11	4	15	7	1	25	24	20	15	45	65	73	107	127	114
CH251	C3.9	000_0.1% Tw80	31	30	17	40	26	20	28	23	15	50	53	42	62	56	61	70	43	56	45	62	47	62	67	47	46	80	78	47	5	6	15	3	12	5	0	7	1	0	8	2	1	12	19	21	33	34	39
CH252	C3.10	000_0.1% Tw80	71	60	34	44	42	33	42	46	47	60	79	57	44	71	79	50	45	48	20	43	60	64	44	29	14	42	20	3	15	10	7	6	3	14	18	5	5	1	0	3	17	8	13	19	33	24	40
CH253	C3.11	000_0.1% Tw80	53	68	34	24	42	47	45	52	62	57	104	94	85	75	108	85	74	69	31	35	54	23	14	10	11	14	9	5	9	5	17	7	10	8	22	5	6	9	13	5	6	16	17	21	27	48	43
CH254	C3.12	000_0.1% Tw80	46	73	73	79	60	72	66	86	90	102	92	75	92	106	103	73	84	88	49	101	50	14	47	57	61	135	58	21	9	9	13	19	5	14	6	4	0	6	12	3	12	11	15	14	14	35	40
CH255	C3.13	000_0.1% Tw80	65	123	137	150	152	151	151	140	152	138	135	131	133	152	109	107	119	134	119	96	79	85	91	81	129	74	99	54	40	72	46	39	16	20	27	8	17	31	54	21	12	67	38	103	141	147	153
CH257	A3.14	002_300ug CBD pure	70	70	61	102	76	73	74	71	102	85	85	86	94	79	73	62	78	77	92	78	42	38	46	70	71	64	62	99	35	97	126	70	101	131	74	78	88	93	108	92	122	95	99	134	197	125	161
CH258	A3.15	002_300ug CBD pure	49	13	7	12	24	19	63	76	101	83	91	85	72	80	92	55	67	61	56	37	35	32	47	28	20	19	63	4	14	56	27	31	8	16	55	11	3	12	21	26	32	36	106	111	165	112	154
CH259	A3.16	002_300ug CBD pure	8	35	70	66	36	70	71	120	105	129	128	107	116	110	88	96	84	147	91	67	19	97	67	161	153	144	126	139	133	188	165	184	194	227	215	193	131	181	129	123	165	145	192	219	188	198	158
CH262	B3.12	001_vehicle emulsion	70	107	100	66	84	105	92	115	92	94	135	104	132	117	83	124	105	111	68	47	77	67	18	10	18	15	55	66	13	47	11	3	4	29	4	22	43	12	22	34	61	30	66	75	45	52	47
CH263	B3.13	001_vehicle emulsion	45	67	71	68	68	70	65	76	78	92	76	96	79	89	67	88	84	116	147	113	39	47	42	47	3	13	40	11	19	20	11	3	11	18	20	7	8	14	22	28	39	35	124	125	84	93	83
CH264	B3.14	001_vehicle emulsion	36	73	111	115	117	104	107	124	138	121	94	99	95	76	69	69	60	128	73	82	68	39	58	84	62	61	71	85	132	161	153	159	156	126	71	41	19	75	83	37	97	136	156	142	167	142	140
CH265	B3.15	001_vehicle emulsion	44	78	126	135	122	136	118	129	125	130	119	118	95	95	94	118	143	96	99	116	140	170	172	199	217	218	187	222	198	193	174	191	204	171	157	158	167	186	180	172	238	229	221	217	236	219	215
CH268	C3.14	000_0.1% Tw80	59	84	74	56	60	53	72	74	90	74	97	72	101	103	84	122	142	107	102	120	155	94	107	64	41	48	39	72	35	38	70	15	9	4	8	2	5	20	6	2	27	36	45	59	98	94	82
CH269	C3.15	000_0.1% Tw80	34	95	66	58	50	61	50	60	74	84	94	96	135	121	110	152	145	119	61	82	156	91	36	33	30	53	24	11	13	7	8	14	0	7	7	3	2	14	8	5	20	46	58	45	78	83	99
CH270	C3.16	000_0.1% Tw80	42	70	92	103	109	74	107	110	108	116	115	141	133	132	106	163	149	150	170	142	105	91	114	103	73	98	79	93	132	122	170	147	94	81	66	89	85	17	45	61	71	50	100	112	109	132	127
CH289	A4.0	003_500ug CBD pure	16	3	23	29	17	10	26	30	31	35	1	6	29	29	21	22	37	74	45	43	18	16	27	57	47	18	28	0	47	2	5	9	4	15	13	3	1	2	2	0	4	1	0	3	2	19	8
CH290	A4.1	003_500ug CBD pure	31	19	12	31	2	4	9	15	6	23	39	26	18	18	21	25	29	45	15	18	2	13	0	37	42	4	33	4	0	0	0	0	0	5	7	0	8	2	0	0	1	0	0	0	23	102	27
CH295	B4.0	002_300ug CBD pure	20	25	13	14	13	26	31	15	46	28	48	37	40	36	42	55	59	72	50	59	36	48	82	41	47	21	2	28	28	12	14	25	6	9	5	1	10	23	24	2	29	33	18	5	22	8	23
CH296	B4.1	002_300ug CBD pure	15	15	13	19	19	31	21	28	33	46	34	20	19	39	35	31	29	6	6	5	16	12	10	11	7	4	1	1	15	11	63	22	6	20	3	60	49	14	24	16	2	15	16	5	8	1	0
CH301	C4.0	001_vehicle emulsion	53	63	44	20	80	22	35	40	48	65	50	63	59	69	40	34	28	15	24	28	42	17	9	74	84	17	18	15	1	1	6	2	2	11	8	3	1	13	6	1	3	6	11	15	26	12	16
CH302	C4.1	001_vehicle emulsion	40	52	23	31	36	42	36	58	45	52	56	56	37	33	54	26	23	38	8	29	18	26	35	24	1	6	1	0	2	4	20	3	0	1	0	0	0	0	2	3	0	4	9	3	3	5	1
CH304	A4.2	003_500ug CBD pure	76	56	32	38	39	44	31	39	66	66	61	75	49	45	53	50	43	52	77	54	18	71	82	17	11	28	39	19	1	20	11	42	2	8	2	0	0	3	0	0	0	5	6	10	30	10	1
CH305	A4.3	003_500ug CBD pure	38	36	10	16	39	47	51	44	40	30	15	55	58	48	47	44	42	43	37	26	22	20	16	34	47	15	0	23	30	8	40	8	10	7	4	0	10	0	0	19	2	0	9	2	13	10	0
CH306	A4.4	003_500ug CBD pure	27	17	4	20	25	11	26	39	18	48	32	62	38	22	26	43	37	13	21	19	31	80	48	72	38	14	29	15	9	8	0	9	16	0	0	31	3	3	5	0	4	7	10	32	45	36	2
CH307	A4.5	003_500ug CBD pure	33	22	72	23	43	22	46	51	70	45	55	46	40	42	37	46	44	50	45	67	14	74	56	47	47	22	12	9	8	9	21	29	151	102	70	15	14	25	20	36	31	20	20	17	66	78	50
CH310	B4.2	002_300ug CBD pure	46	80	111	113	121	52	59	78	73	39	49	53	81	91	88	54	69	65	78	83	48	59	107	28	41	48	132	76	86	113	85	25	37	37	42	13	18	26	41	60	54	30	42	44	77	91	78
CH311	B4.3	002_300ug CBD pure	17	30	56	88	41	80	45	40	55	55	57	76	45	50	56	58	78	50	49	43	76	36	27	29	33	5	30	29	7	10	53	4	5	24	0	0	0	0	2	11	0	2	23	22	39	4	51
CH312	B4.4	002_300ug CBD pure	35	22	16	18	55	64	48	62	76	58	43	67	86	73	71	53	43	42	49	32	24	63	37	16	39	18	44	26	28	5	17	17	54	74	23	3	6	7	4	13	0	10	19	15	14	28	22
CH313	B4.5	002_300ug CBD pure	33	27	5	17	65	36	57	66	66	70	70	63	60	57	48	42	29	24	45	31	11	31	16	16	17	11	26	13	13	11	31	70	97	28	31	10	11	39	41	26	24	20	30	28	62	98	68
CH316	C4.2	001_vehicle emulsion	88	74	40	42	23	24	22	30	54	69	84	79	51	48	69	69	67	39	36	78	1	13	19	7	4	18	20	139	107	60	88	17	2	18	35	8	23	5	8	4	73	113	10	7	24	44	40
CH317	C4.3	001_vehicle emulsion	51	57	37	36	26	15	20	58	71	42	44	37	36	37	40	39	16	12	35	18	3	2	10	5	6	9	5	0	1	1	5	5	8	5	9	1	4	1	4	0	8	6	19	9	24	16	14
CH318	C4.4	001_vehicle emulsion	34	48	48	51	19	46	75	87	82	90	85	66	45	55	55	53	56	38	28	32	31	23	6	7	20	42	27	9	4	2	6	7	6	2	2	0	0	0	1	1	1	1	4	8	19	8	12
CH319	C4.5	001_vehicle emulsion	22	72	120	112	129	123	125	102	100	106	124	77	85	114	122	92	88	97	93	69	64	72	28	92	55	78	6	9	12	8	12	13	1	9	11	2	3	12	8	8	5	4	13	13	30	50	36
CH320	A4.6	003_500ug CBD pure	32	19	19	25	33	41	44	30	29	39	85	32	47	73	111	72	96	138	52	28	52	52	46	30	16	15	15	41	67	35	51	16	65	14	20	24	16	21	9	9	26	57	20	71	98	51	52
CH321	A4.7	003_500ug CBD pure	74	54	16	42	65	20	16	22	33	10	13	26	17	18	13	12	17	26	12	12	22	16	11	12	14	0	13	5	12	48	4	0	2	0	2	0	14	0	4	0	0	0	1	0	0	1	0
CH322	A4.8	003_500ug CBD pure	47	17	28	27	14	7	17	20	23	14	12	23	22	28	20	14	36	19	8	15	6	14	0	28	3	0	0	8	2	0	6	23	22	5	0	4	5	0	0	0	1	0	1	11	0	6	13
CH323	A4.9	003_500ug CBD pure	64	94	73	44	13	5	28	37	45	36	77	53	94	77	69	97	70	86	145	159	94	73	52	58	84	85	42	38	29	31	14	84	102	89	2	0	59	24	17	1	2	0	42	4	16	30	22
CH324	A4.10	003_500ug CBD pure	59	11	57	65	87	98	82	100	47	78	68	78	86	92	78	131	39	93	105	60	40	39	55	57	78	124	52	19	28	63	45	55	59	17	22	13	1	11	21	9	5	1	7	10	23	32	47
CH326	B4.6	002_300ug CBD pure	37	70	53	41	51	40	86	40	66	61	64	63	95	100	61	65	53	57	52	76	58	16	69	127	66	27	38	51	29	16	27	2	90	74	46	8	2	3	2	6	12	41	32	12	9	66	38
CH327	B4.7	002_300ug CBD pure	42	57	44	28	73	69	49	40	22	67	73	55	47	39	49	64	70	58	40	24	56	34	24	37	45	38	76	61	65	32	81	45	14	31	19	4	22	13	25	14	9	1	13	21	63	41	23
CH328	B4.8	002_300ug CBD pure	78	50	54	27	91	71	66	78	60	81	58	66	64	43	55	56	50	50	60	33	39	54	96	18	16	6	15	16	9	41	2	17	7	1	1	6	1	7	4	1	0	10	2	17	15	55	23
CH329	B4.9	002_300ug CBD pure	56	59	48	77	80	112	111	132	110	139	98	119	95	99	75	90	109	66	65	54	57	13	24	15	26	51	52	60	46	15	12	3	11	24	0	0	1	5	0	0	5	5	6	20	21	23	17
CH331	C4.6	001_vehicle emulsion	72	96	37	30	23	26	22	50	55	55	66	82	44	55	49	61	51	54	34	59	38	46	18	9	8	121	190	97	30	0	2	1	0	4	3	4	0	4	11	4	9	20	15	38	38	41	36
CH332	C4.7	001_vehicle emulsion	45	69	35	39	19	28	22	28	46	70	51	51	56	39	25	32	13	19	11	6	9	11	2	4	0	4	6	2	4	5	2	4	15	3	3	0	0	0	0	1	4	12	21	9	26	32	38
CH333	C4.8	001_vehicle emulsion	52	78	56	59	37	47	55	78	63	98	85	89	110	67	83	55	38	47	28	16	20	10	15	5	25	6	15	26	71	93	16	91	87	26	28	57	11	0	28	35	10	37	66	67	43	38	39
CH334	C4.9	001_vehicle emulsion	47	118	61	95	59	52	67	70	85	93	71	71	42	63	52	55	82	48	45	29	32	28	22	21	81	76	96	17	11	27	6	0	19	7	10	1	0	5	12	4	11	8	37	12	20	41	41
CH335	C4.10	001_vehicle emulsion	56	164	150	154	162	189	183	178	182	192	173	188	181	152	182	187	144	129	123	127	92	102	95	77	73	17	49	24	27	23	41	35	22	0	10	2	0	0	0	23	7	12	23	28	28	82	94
CH336	A4.11	003_500ug CBD pure	35	74	87	97	30	9	78	107	39	27	33	32	28	19	18	29	63	59	37	7	0	12	8	34	0	0	2	2	5	7	24	62	6	40	5	6	0	0	1	0	0	0	2	10	58	30	36
CH337	A4.12	003_500ug CBD pure	50	49	31	41	48	45	47	38	52	34	30	37	23	36	15	26	24	16	14	11	29	6	14	10	5	6	15	42	11	1	15	14	1	8	13	1	2	6	9	1	1	0	6	5	10	67	75
CH338	A4.13	003_500ug CBD pure	83	42	24	10	25	20	33	10	58	22	43	60	29	24	30	19	43	48	40	14	9	0	34	13	27	13	9	38	1	19	29	9	19	47	42	4	13	7	5	1	21	7	6	16	24	51	36
CH339	A4.14	003_500ug CBD pure	50	21	49	35	16	19	34	62	64	59	100	72	83	80	92	77	75	65	64	71	45	79	116	112	36	90	66	29	106	102	54	49	54	19	47	35	16	15	16	5	13	59	36	27	52	50	47
CH342	B4.10	002_300ug CBD pure	41	47	30	46	51	73	59	78	107	58	85	76	110	84	82	67	35	80	35	79	41	33	23	24	20	94	53	29	25	22	47	34	14	35	32	30	9	20	32	27	137	204	236	244	207	211	159
CH343	B4.11	002_300ug CBD pure	72	60	41	75	98	92	46	67	49	77	79	74	88	67	94	113	80	62	127	80	28	44	83	23	39	56	86	17	16	58	167	88	75	6	2	2	0	2	1	9	6	1	6	19	22	61	50
CH344	B4.12	002_300ug CBD pure	28	47	29	30	54	86	66	70	73	77	85	85	69	71	70	71	69	38	50	18	22	36	25	8	26	57	68	4	20	22	40	35	22	7	2	5	12	12	24	23	12	9	7	61	60	60	42
CH345	B4.13	002_300ug CBD pure	67	56	22	54	56	47	61	89	89	90	90	61	66	62	48	89	79	43	70	47	33	52	82	47	98	119	42	45	55	53	109	59	47	82	90	112	100	53	66	51	40	39	50	74	70	120	123
CH348	C4.11	001_vehicle emulsion	56	63	57	28	17	38	21	47	54	55	62	77	59	74	58	43	23	25	43	26	47	20	39	10	11	13	0	7	3	3	7	0	3	0	2	0	0	0	2	1	6	1	9	19	30	25	23
CH349	C4.12	001_vehicle emulsion	53	75	49	44	41	69	46	53	60	61	63	49	53	53	80	46	18	27	15	21	11	19	3	13	0	4	18	12	9	12	40	18	20	33	2	4	4	3	0	9	14	3	7	21	26	31	59
CH350	C4.13	001_vehicle emulsion	66	92	106	99	102	125	128	145	131	138	122	114	129	84	110	111	78	91	74	54	86	35	38	41	78	45	34	48	48	46	57	23	18	26	6	21	17	15	1	11	7	52	33	50	109	96	135
CH351	C4.14	001_vehicle emulsion	87	89	138	164	137	141	133	135	154	148	130	132	134	156	167	147	153	142	154	139	115	152	125	145	111	118	104	112	107	94	86	54	132	58	33	9	18	18	58	40	36	39	84	87	129	114	122
CH353	A4.15	003_500ug CBD pure	45	39	58	32	88	53	30	57	118	132	53	90	52	34	48	95	65	49	36	39	42	60	57	151	123	119	42	47	32	67	22	68	46	13	31	64	2	10	40	109	24	43	33	7	37	68	85
CH354	A4.16	003_500ug CBD pure	50	21	15	10	28	61	41	50	50	39	75	69	59	79	71	113	75	101	99	49	45	84	101	44	70	93	72	73	97	88	81	34	91	146	49	55	89	148	55	70	54	82	123	100	128	141	138
CH359	B4.14	002_300ug CBD pure	44	29	64	135	68	61	88	52	65	55	44	86	78	85	78	90	61	67	42	92	111	116	72	78	53	17	34	29	15	14	113	56	15	14	11	4	16	32	8	46	13	30	62	49	95	79	99
CH360	B4.15	002_300ug CBD pure	30	51	17	27	31	31	61	68	80	53	46	95	87	80	67	97	110	105	59	45	54	32	50	13	9	34	56	88	50	46	99	105	148	152	135	138	158	96	68	83	18	48	102	140	135	131	166
CH365	C4.15	001_vehicle emulsion	20	28	55	45	53	56	57	62	89	63	71	50	61	63	55	47	70	52	28	31	41	23	12	14	10	40	110	143	37	28	17	11	30	30	24	25	13	27	18	39	39	53	108	145	136	138	103
CH366	C4.16	001_vehicle emulsion	43	82	89	87	108	118	103	132	96	109	106	98	68	89	88	90	110	70	72	97	49	108	91	125	42	85	123	127	135	154	177	145	181	158	163	123	139	170	162	162	165	209	212	232	197	219	206
[truncated: 119 more columns]

## Sheet: wDAT ex1 tR
DATE:	2023-10-28 11:35:22
FILE:	C:\Software\WMicrotracker One\wmicrotracker_w8_v30api\wmicrotracker\wmicrotracker\p00029\20231024_1733
SUBPROJECT:	2023 1024-27 wDAT extract twVC 300-750 tR ex1
<<<<<< Group Activity: Average Activity Counts per Data Interval>>>>>>
Group/Time[m]	30	60	90	120	150	180	210	240	270	300	330	360	390	420	450	480	510	540	570	600	630	660	690	720	750	780	810	840	870	900	930	960	990	1020	1050	1080	1110	1140	1170	1200	1230	1260	1290	1320	1350	1380	1410	1440	1470
000_0.1%Tw80	53	65	63	59	65	65	70	76	84	83	87	87	83	80	77	76	69	64	59	52	43	37	36	35	34	32	30	30	22	23	29	27	23	22	24	20	20	15	20	21	26	35	44	51	47	58	55	60	70
001_vehicle emulsion	46	66	59	59	61	65	74	79	86	85	84	79	75	70	68	64	57	51	48	42	42	38	32	32	35	31	31	38	37	38	31	28	26	25	25	22	20	19	25	27	29	35	39	45	45	46	45	50	59
002_300ug CBD in extract	41	42	38	38	52	54	64	60	62	63	64	70	65	72	71	68	64	61	60	56	53	51	46	48	45	46	42	44	48	46	50	51	43	39	40	28	25	20	18	23	32	36	44	48	52	68	70	70	89
003_500ug CBD in extract	40	32	26	35	32	27	28	30	39	35	36	36	42	45	42	41	50	47	46	42	40	42	34	38	42	42	38	36	40	34	34	30	33	39	38	32	27	26	22	28	24	25	23	26	29	36	38	46	70
004_750ug CBD in extract	39	30	28	26	28	20	22	26	22	27	28	31	31	37	38	38	38	40	44	40	36	42	36	32	28	32	34	32	32	29	34	30	38	39	38	35	36	29	28	30	28	28	31	28	20	25	21	32	50
hours	2	2.5	3	3.5	4	4.5	5	5.5	6	6.5	7	7.5	8	8.5	9	9.5	10	10.5	11	11.5	12	12.5	13	13.5	14	14.5	15	15.5	16	16.5	17	17.5	18	18.5	19	19.5	20	20.5	21	21.5	22	22.5	23	23.5	24	24.5	25	25.5	26
<<<<<< Group Activity: Standard Error >>>>>>
Group/Time[m]	30	60	90	120	150	180	210	240	270	300	330	360	390	420	450	480	510	540	570	600	630	660	690	720	750	780	810	840	870	900	930	960	990	1020	1050	1080	1110	1140	1170	1200	1230	1260	1290	1320	1350	1380	1410	1440	1470
000_0.1%Tw80	3.5	6.4	6.4	5.8	5.8	7.5	8.1	8.1	6.9	5.2	8.1	6.9	6.9	5.8	6.9	10.4	8.1	11	12.1	9.2	5.2	8.7	4	5.8	5.2	6.4	7.5	4.6	1.7	3.5	5.2	6.4	5.8	2.3	1.7	5.8	3.5	2.9	2.9	2.9	3.5	8.1	6.4	5.8	5.8	6.4	5.2	5.8	3.5
001_vehicle emulsion	0.6	1.2	0.6	1.7	4.6	6.4	7.5	6.9	5.8	4.6	5.2	1.2	2.3	0	1.7	1.2	3.5	1.7	4	3.5	2.9	4	4	4.6	8.1	6.9	5.2	5.8	6.4	9.2	5.8	4	2.3	1.2	1.2	2.9	2.9	2.3	5.8	5.8	4.6	2.3	3.5	2.9	2.3	2.9	2.3	4.6	8.7
002_300ug CBD in extract	2.1	3.5	5.7	2.8	4.2	7.1	1.4	3.5	3.5	0.7	0.7	1.4	0.7	2.8	0.7	0.7	3.5	0.7	2.1	0.7	2.8	7.8	3.5	2.8	4.2	4.2	4.2	3.5	2.8	0.7	3.5	9.9	5.7	2.8	14.1	3.5	2.1	0	0.7	9.2	6.4	2.8	8.5	0.7	2.1	0.7	2.8	1.4	0
003_500ug CBD in extract	0.7	0.7	4.2	2.8	1.4	4.2	4.2	2.8	2.8	0	1.4	0.7	2.8	4.2	3.5	0.7	1.4	2.1	5.7	6.4	0.7	2.1	5.7	2.8	0.7	4.2	0.7	0.7	2.1	0.7	2.8	0.7	2.1	4.9	1.4	6.4	7.1	3.5	1.4	0	0.7	4.9	0.7	2.8	2.1	4.9	3.5	4.2	9.9
004_750ug CBD in extract	0	3.5	0.7	0.7	2.8	0.7	0.7	0.7	3.5	4.2	4.2	2.8	2.1	0.7	0	6.4	3.5	2.1	3.5	5.7	1.4	1.4	2.1	1.4	4.2	0	4.2	1.4	0.7	5.7	3.5	1.4	5.7	2.1	3.5	4.2	0.7	0.7	3.5	2.1	0	2.8	5.7	3.5	0.7	4.2	2.1	2.8	2.8
<<<<<< Group Activity: Number of wells/group >>>>>>
Group/Time[m]	30	60	90	120	150	180	210	240	270	300	330	360	390	420	450	480	510	540	570	600	630	660	690	720	750	780	810	840	870	900	930	960	990	1020	1050	1080	1110	1140	1170	1200	1230	1260	1290	1320	1350	1380	1410	1440	1470
000_0.1%Tw80	3	3	3	3	3	3	3	3	3	3	3	3	3	3	3	3	3	3	3	3	3	3	3	3	3	3	3	3	3	3	3	3	3	3	3	3	3	3	3	3	3	3	3	3	3	3	3	3	3
001_vehicle emulsion	3	3	3	3	3	3	3	3	3	3	3	3	3	3	3	3	3	3	3	3	3	3	3	3	3	3	3	3	3	3	3	3	3	3	3	3	3	3	3	3	3	3	3	3	3	3	3	3	3
002_300ug CBD in extract	2	2	2	2	2	2	2	2	2	2	2	2	2	2	2	2	2	2	2	2	2	2	2	2	2	2	2	2	2	2	2	2	2	2	2	2	2	2	2	2	2	2	2	2	2	2	2	2	2
003_500ug CBD in extract	2	2	2	2	2	2	2	2	2	2	2	2	2	2	2	2	2	2	2	2	2	2	2	2	2	2	2	2	2	2	2	2	2	2	2	2	2	2	2	2	2	2	2	2	2	2	2	2	2
004_750ug CBD in extract	2	2	2	2	2	2	2	2	2	2	2	2	2	2	2	2	2	2	2	2	2	2	2	2	2	2	2	2	2	2	2	2	2	2	2	2	2	2	2	2	2	2	2	2	2	2	2	2	2
<<<<<< Number of Samples per Acquisition Interval [1unit=500values] >>>>>>
Time[m]	30	60	90	120	150	180	210	240	270	300	330	360	390	420	450	480	510	540	570	600	630	660	690	720	750	780	810	840	870	900	930	960	990	1020	1050	1080	1110	1140	1170	1200	1230	1260	1290	1320	1350	1380	1410	1440	1470
#Samples	30	30	30	30	30	30	30	30	30	30	30	30	30	30	30	30	30	30	30	30	30	30	30	30	30	30	30	30	30	30	30	30	30	30	30	30	30	30	30	30	30	30	30	30	30	30	30	30	30
<<<<<< Average Temperature [°C] >>>>>>
Time[m]	30	60	90	120	150	180	210	240	270	300	330	360	390	420	450	480	510	540	570	600	630	660	690	720	750	780	810	840	870	900	930	960	990	1020	1050	1080	1110	1140	1170	1200	1230	1260	1290	1320	1350	1380	1410	1440	1470
Temp[°C]	22.3	22.3	22.6	22.6	22.6	22.6	22.6	22.6	22.6	22.6	22.8	22.6	22.6	22.6	22.6	22.6	22.6	22.6	22.6	22.6	22.6	22.6	22.8	22.8	22.8	22.6	22.6	22.8	22.6	22.6	22.6	22.6	22.6	22.6	22.6	22.6	22.6	22.6	22.6	22.6	22.6	22.6	22.6	22.6	22.6	22.8	22.6	22.6	22.6
<<<<<< Well Activity >>>>>>
Well	Group/Time[m]	30	60	90	120	150	180	210	240	270	300	330	360	390	420	450	480	510	540	570	600	630	660	690	720	750	780	810	840	870	900	930	960	990	1020	1050	1080	1110	1140	1170	1200	1230	1260	1290	1320	1350	1380	1410	1440
A1	000_0.1%Tw80	46	57	52	51	59	58	65	71	79	80	76	75	71	69	64	56	53	44	40	36	34	25	28	24	27	21	19	20	19	16	19	17	16	19	22	11	15	12	16	25	31	48	56	61	56	70	61	70
B1	004_750ug CBD in extract	39	33	27	27	30	21	21	25	19	23	24	34	29	38	38	45	42	38	40	34	37	44	38	30	24	32	38	34	32	23	30	32	43	41	41	39	35	28	31	32	28	25	25	24	20	21	23	30
C1	003_500ug CBD in extract	40	33	22	32	31	23	24	27	36	35	38	36	39	41	39	40	48	45	40	36	39	44	39	41	42	38	37	35	38	34	37	30	35	34	37	26	20	23	21	28	24	20	22	28	27	31	34	42
A2	001_vehicle emulsion	47	68	58	61	64	69	77	81	89	86	82	80	77	70	66	63	57	49	40	37	37	31	24	23	20	18	22	27	25	20	23	22	21	25	24	17	18	15	20	26	29	38	41	46	43	43	41	41
B2	000_0.1%Tw80	58	78	73	70	76	80	86	92	97	93	102	99	95	89	84	87	76	66	56	52	43	32	39	42	30	32	27	34	25	26	37	24	19	21	28	30	27	21	20	23	27	35	41	52	49	56	58	61
C2	004_750ug CBD in extract	39	26	28	26	25	19	22	26	26	31	33	28	33	36	38	32	35	42	47	46	34	41	34	33	33	32	29	31	31	35	37	29	32	37	34	31	37	30	24	28	28	31	37	31	21	29	19	35
A3	002_300ug CBD in extract	39	39	33	35	48	47	65	64	59	62	65	68	64	69	70	67	61	62	58	56	50	43	43	45	41	42	38	41	50	47	47	41	37	36	26	25	27	20	19	32	39	39	52	48	54	69	73	72
B3	001_vehicle emulsion	45	65	60	61	66	73	85	90	94	93	93	81	78	70	72	66	63	50	50	39	46	39	36	36	40	41	39	46	46	52	42	36	28	27	27	26	17	23	37	37	37	37	44	49	50	52	49	57
C3	000_0.1%Tw80	55	61	64	56	60	56	60	66	75	77	82	88	84	83	84	86	77	82	81	68	51	53	42	40	44	42	45	35	21	28	31	39	35	27	22	18	17	13	25	15	19	21	35	41	36	48	45	50
A4	003_500ug CBD in extract	41	31	31	38	34	31	33	32	42	35	35	37	44	49	46	42	51	49	52	49	40	40	28	36	41	47	39	36	42	35	31	31	31	44	40	39	34	30	24	28	25	30	24	23	31	41	41	51
B4	002_300ug CBD in extract	43	46	44	41	57	61	62	57	66	64	64	71	66	74	72	68	68	60	62	57	56	59	50	50	49	50	47	48	45	45	54	61	49	42	54	32	23	20	17	14	26	34	35	49	50	67	68	69
C4	001_vehicle emulsion	47	65	58	55	52	53	59	67	75	77	76	77	71	70	66	62	52	54	53	49	42	45	35	36	46	35	31	40	39	41	29	27	28	23	23	24	26	20	18	18	21	30	33	39	42	43	45	51
<<<<<< Channel Activity >>>>>>
Channel	Well	Group/Time[m]	30	60	90	120	150	180	210	240	270	300	330	360	390	420	450	480	510	540	570	600	630	660	690	720	750	780	810	840	870	900	930	960	990	1020	1050	1080	1110	1140	1170	1200	1230	1260	1290	1320	1350	1380	1410
CH17	A1.0	000_0.1%Tw80	32	2	0	0	0	0	0	0	0	0	0	0	0	0	0	0	44	50	59	42	23	22	50	25	20	7	11	6	24	13	6	9	3	4	3	0	14	2	3	3	2	14	16	26	13	17	13
CH18	A1.1	000_0.1%Tw80	64	57	63	70	73	66	74	68	86	92	70	96	94	74	93	70	41	46	34	30	72	31	13	10	53	19	22	6	6	6	5	7	2	8	16	2	5	6	6	17	26	26	27	21	9	30	15
CH23	B1.0	004_750ug CBD in extract	38	40	15	14	14	15	26	12	8	23	7	2	1	3	0	7	5	2	3	1	14	0	0	0	0	0	0	0	1	0	0	0	1	0	0	0	0	0	0	0	0	2	0	0	0	0	0
CH24	B1.1	004_750ug CBD in extract	16	18	1	13	6	21	5	2	1	1	12	7	4	7	13	19	12	3	6	3	8	3	3	6	3	3	10	15	0	1	1	8	2	6	6	0	3	1	9	2	1	7	4	1	3	5	0
CH29	C1.0	003_500ug CBD in extract	23	32	17	13	23	16	12	24	55	58	40	61	35	43	18	8	33	15	14	20	15	4	6	26	26	9	21	0	16	2	38	26	32	0	7	0	0	0	2	5	5	2	3	0	0	0	0
CH30	C1.1	003_500ug CBD in extract	40	29	34	68	23	25	25	24	18	14	54	48	24	39	13	23	52	54	58	7	20	17	3	4	5	33	12	20	21	3	3	23	20	11	43	8	9	15	6	1	16	25	62	17	47	43	45
CH32	A1.2	000_0.1%Tw80	29	55	30	35	43	41	35	59	74	60	71	79	76	53	36	65	48	16	16	15	22	10	16	9	1	31	8	2	1	2	2	0	0	0	0	1	13	3	0	0	0	23	22	17	17	20	30
CH33	A1.3	000_0.1%Tw80	57	47	59	38	50	61	75	86	101	73	83	75	71	72	65	55	21	11	28	16	16	9	11	3	6	6	0	1	5	3	0	2	5	14	14	0	0	4	2	2	3	56	33	29	17	23	24
CH34	A1.4	000_0.1%Tw80	44	45	38	28	36	30	51	46	60	68	64	49	56	50	48	26	25	10	16	7	6	4	11	8	2	3	1	2	0	1	3	0	0	5	7	1	2	0	3	10	5	9	7	36	28	26	14
CH35	A1.5	000_0.1%Tw80	53	62	68	68	69	69	64	82	86	88	72	66	77	67	52	41	37	46	33	29	31	38	23	18	12	6	1	3	3	1	2	1	1	5	6	6	5	9	3	6	9	14	83	61	19	39	33
CH38	B1.2	004_750ug CBD in extract	25	53	23	14	5	6	14	25	16	15	14	14	15	7	17	35	29	33	23	33	24	1	28	22	6	21	13	4	10	0	5	24	28	7	2	0	29	33	0	0	0	0	19	3	29	13	21
CH39	B1.3	004_750ug CBD in extract	40	42	21	32	41	16	19	42	37	3	13	13	19	16	31	21	7	14	14	15	31	18	36	34	20	25	13	20	24	23	33	40	33	57	7	25	35	6	2	25	13	8	0	2	0	0	0
CH40	B1.4	004_750ug CBD in extract	81	59	58	47	45	17	8	24	20	19	23	27	24	11	14	53	18	50	36	10	19	22	34	20	20	26	36	33	30	9	13	14	12	13	11	3	3	20	14	1	0	0	0	8	3	6	0
CH41	B1.5	004_750ug CBD in extract	29	36	65	43	55	12	11	54	44	27	26	27	30	32	47	47	46	55	55	101	95	131	30	12	29	34	35	66	19	10	23	53	145	83	141	89	14	12	10	8	14	0	5	0	8	11	0
CH44	C1.2	003_500ug CBD in extract	21	18	12	21	27	13	9	37	44	13	16	21	26	9	14	13	27	35	50	33	22	35	29	40	60	26	25	4	27	23	11	20	13	6	11	20	0	7	2	12	1	0	0	1	50	49	37
CH45	C1.3	003_500ug CBD in extract	26	24	27	26	31	14	13	5	6	16	27	8	25	15	17	18	27	34	13	15	15	39	13	10	6	3	10	5	5	7	10	5	4	5	11	0	14	12	9	3	1	0	0	10	5	16	2
CH46	C1.4	003_500ug CBD in extract	55	61	21	32	34	20	9	3	2	14	24	21	35	13	19	21	11	37	9	4	5	18	12	15	21	20	27	24	6	6	14	11	11	14	24	4	3	11	11	22	5	30	17	6	0	1	2
CH47	C1.5	003_500ug CBD in extract	41	19	10	29	27	16	18	38	43	5	23	39	40	46	49	38	39	43	57	21	25	118	38	38	20	42	46	22	17	17	13	48	83	37	32	22	39	29	5	14	8	55	40	17	23	44	27
CH48	A1.6	000_0.1%Tw80	45	55	44	40	30	30	53	60	67	68	89	75	90	62	69	70	86	33	17	25	26	12	8	6	11	0	11	1	0	0	1	2	0	0	1	0	2	6	1	4	6	48	37	25	45	30	33
CH49	A1.7	000_0.1%Tw80	39	44	47	39	44	35	58	53	58	111	60	82	61	62	40	42	41	20	10	12	22	5	2	2	0	0	1	4	1	2	2	1	1	4	14	1	0	1	2	3	24	25	45	42	21	43	15
CH50	A1.8	000_0.1%Tw80	76	97	71	76	90	88	97	134	118	110	93	99	76	76	76	51	31	30	31	39	16	1	7	7	6	4	0	1	6	4	0	4	3	0	2	1	0	2	1	6	7	23	32	21	31	16	38
CH51	A1.9	000_0.1%Tw80	67	130	87	92	117	105	122	136	144	113	113	110	119	97	101	59	58	66	36	23	28	19	15	34	17	18	11	5	13	11	2	3	0	1	10	2	10	4	9	17	11	50	66	51	65	74	60
CH52	A1.10	000_0.1%Tw80	71	111	98	103	114	107	116	102	112	132	127	127	124	132	131	97	115	125	119	127	137	89	121	122	137	117	133	123	102	120	123	118	120	129	115	86	90	62	83	78	85	95	127	109	141	190	180
CH54	B1.6	004_750ug CBD in extract	31	45	26	24	20	9	34	10	13	16	24	25	16	26	39	38	36	36	57	56	44	53	54	9	17	19	60	33	48	28	41	28	36	31	45	46	52	3	37	0	48	0	0	4	0	2	4
CH55	B1.7	004_750ug CBD in extract	33	60	48	43	41	39	33	43	32	52	32	46	41	47	41	48	78	32	47	22	43	18	32	20	23	8	40	29	5	6	1	6	18	25	9	14	10	23	9	61	17	19	90	40	2	5	0
CH56	B1.8	004_750ug CBD in extract	98	28	43	69	68	53	32	43	19	17	42	37	41	49	60	83	73	56	66	42	22	25	72	56	22	33	23	33	47	51	33	33	15	26	10	5	4	0	1	47	7	11	9	38	21	3	3
CH57	B1.9	004_750ug CBD in extract	58	27	25	48	60	29	46	24	17	45	48	44	48	78	79	53	50	69	68	60	45	71	96	40	68	66	100	68	34	75	26	13	76	70	70	99	88	94	38	12	82	9	1	21	66	39	30
CH59	C1.6	003_500ug CBD in extract	47	32	22	26	23	43	77	12	49	17	28	13	36	49	50	70	100	73	49	59	63	80	59	131	108	79	68	43	60	49	131	64	37	56	121	24	15	5	4	7	25	7	14	14	6	15	12
CH60	C1.7	003_500ug CBD in extract	38	20	15	21	25	25	44	55	44	37	62	25	35	28	19	34	37	26	40	46	35	21	50	53	30	21	35	53	37	74	82	22	32	2	9	1	0	5	7	8	25	21	11	25	0	5	11
CH61	C1.8	003_500ug CBD in extract	58	67	41	45	55	33	28	26	35	34	36	33	64	32	71	57	57	58	37	47	42	48	42	50	61	27	19	41	59	16	23	18	35	25	0	41	6	11	0	39	22	12	5	48	25	0	10
CH62	C1.9	003_500ug CBD in extract	69	32	43	28	33	9	11	21	9	16	30	10	33	47	37	41	36	47	23	19	44	35	40	11	19	30	33	27	28	10	46	33	19	13	24	24	10	12	6	3	4	2	4	18	12	10	21
CH63	C1.10	003_500ug CBD in extract	31	33	24	26	25	17	23	23	34	34	39	58	52	50	58	34	48	36	32	35	44	60	94	36	45	49	63	84	81	72	55	28	38	60	29	46	34	98	66	22	3	8	19	13	7	27	36
CH64	A1.11	000_0.1%Tw80	15	18	27	21	41	56	64	54	83	107	88	83	65	70	111	79	90	81	67	68	28	51	25	46	64	14	0	21	8	3	0	5	3	2	0	0	1	7	5	16	26	14	74	50	38	88	67
CH65	A1.12	000_0.1%Tw80	47	51	56	47	55	75	72	66	83	98	91	86	68	84	43	65	70	51	38	8	23	16	11	2	12	8	0	0	12	0	2	0	0	8	19	3	5	3	23	16	28	59	52	44	28	53	53
CH66	A1.13	000_0.1%Tw80	50	44	55	60	67	72	73	93	115	86	98	77	67	91	67	69	46	27	76	21	18	8	22	19	4	8	10	5	2	0	3	0	3	24	22	2	7	6	6	29	16	25	38	50	54	55	51
CH67	A1.14	000_0.1%Tw80	76	130	124	122	141	125	128	145	135	142	141	138	122	141	125	121	97	103	73	112	77	94	110	78	83	82	80	106	106	67	81	47	75	69	78	35	42	35	67	109	114	177	139	188	152	190	177
CH70	B1.10	004_750ug CBD in extract	28	23	4	22	13	14	8	7	6	12	6	13	12	25	27	37	53	25	51	21	34	63	57	50	8	42	20	36	14	1	17	28	50	49	48	24	21	18	17	1	4	9	10	21	7	29	28
CH71	B1.11	004_750ug CBD in extract	27	30	32	44	19	15	9	28	19	25	23	31	39	47	35	67	51	21	53	29	32	62	45	57	34	39	29	46	38	61	29	15	13	9	36	17	11	0	22	24	10	20	11	27	72	73	58
CH72	B1.12	004_750ug CBD in extract	31	24	19	11	16	30	11	38	34	40	31	75	54	113	68	50	35	81	30	30	34	36	16	10	20	30	26	16	14	6	22	51	33	41	71	34	104	72	122	104	79	33	10	7	0	13	3
CH73	B1.13	004_750ug CBD in extract	41	24	44	11	41	34	63	45	20	42	52	131	77	106	103	91	109	81	81	80	46	80	58	109	51	62	149	118	130	49	105	110	106	144	132	140	85	62	96	122	98	111	143	124	56	95	110
CH76	C1.11	003_500ug CBD in extract	45	13	17	23	28	23	12	43	48	86	24	50	44	59	65	40	81	44	19	46	31	44	53	38	30	64	50	40	46	37	25	20	47	39	37	35	18	14	17	59	4	7	0	5	14	39	15
CH77	C1.12	003_500ug CBD in extract	59	46	38	63	38	36	35	43	52	59	46	60	55	54	64	58	47	60	83	35	37	37	26	68	62	45	19	28	6	52	15	16	58	10	20	7	11	4	17	26	13	2	7	16	16	9	16
CH78	C1.13	003_500ug CBD in extract	49	42	25	63	50	49	33	52	89	69	68	81	47	62	34	53	59	91	60	74	79	46	39	28	56	37	16	33	90	57	28	36	48	38	39	24	18	11	9	32	58	24	11	65	55	22	94
CH79	C1.14	003_500ug CBD in extract	15	23	20	24	35	32	30	24	35	49	64	51	50	70	71	58	81	51	64	72	77	64	73	96	84	78	61	77	84	63	97	92	70	82	96	98	102	121	139	139	115	123	158	172	172	172	182
CH81	A1.15	000_0.1%Tw80	11	0	0	0	0	0	0	0	0	0	0	0	0	0	0	0	0	0	0	0	0	0	0	0	0	0	0	0	0	0	0	0	0	0	0	0	0	0	0	0	0	0	0	139	158	182	121
CH82	A1.16	000_0.1%Tw80	9	15	13	26	30	23	15	18	19	17	33	29	38	36	30	35	49	26	33	30	25	18	29	26	34	39	37	57	33	42	83	96	49	46	75	43	52	47	59	101	157	160	153	131	111	106	111
CH87	B1.14	004_750ug CBD in extract	34	14	9	3	33	17	11	9	18	22	22	37	30	24	29	44	52	39	42	29	86	102	41	30	43	84	42	19	67	32	118	53	89	39	37	97	48	43	15	19	33	77	43	37	21	14	76
CH88	B1.15	004_750ug CBD in extract	8	2	0	1	2	2	2	1	3	4	4	11	7	12	5	20	16	15	15	13	11	12	13	2	13	12	20	5	26	17	12	32	27	50	27	38	57	63	103	81	42	89	51	59	32	25	33
CH93	C1.15	003_500ug CBD in extract	59	60	14	34	47	19	24	30	50	77	62	34	67	66	60	106	81	64	65	85	107	77	80	48	73	87	117	83	58	91	33	46	34	140	97	58	32	22	38	59	60	1	11	8	4	52	61
CH94	C1.16	003_500ug CBD in extract	6	4	0	0	1	1	5	4	5	5	3	3	2	8	5	10	2	5	5	2	5	1	3	2	6	3	2	5	3	5	11	10	10	34	23	28	22	14	14	28	39	23	14	35	20	15	7
CH113	A2.0	001_vehicle emulsion	32	58	57	50	52	28	23	34	27	38	34	27	22	21	15	11	9	6	1	0	0	5	0	0	0	0	0	0	0	0	0	0	0	1	0	2	0	0	1	0	0	0	0	1	2	0	0
CH114	A2.1	001_vehicle emulsion	99	80	73	79	71	67	70	70	96	95	107	111	98	93	106	57	72	73	47	89	61	23	21	22	7	7	3	7	3	7	2	4	2	6	5	0	3	2	0	2	9	16	10	23	37	33	5
CH115	A2.2	001_vehicle emulsion	43	109	113	114	104	119	88	101	118	117	89	89	72	83	74	79	84	79	70	75	78	59	32	47	19	30	40	77	55	9	1	5	7	6	14	5	9	4	7	4	2	13	5	25	14	23	26
CH118	B2.0	000_0.1%Tw80	67	70	21	22	17	15	14	5	2	1	3	3	0	2	3	0	0	0	0	0	0	0	0	0	0	0	0	0	0	0	0	0	0	0	0	0	0	0	0	0	0	0	0	0	0	0	0
CH119	B2.1	000_0.1%Tw80	72	67	66	59	53	89	70	80	107	100	112	91	105	73	91	71	65	50	37	38	24	17	59	33	26	30	11	20	1	0	10	2	10	2	37	7	1	1	2	11	1	1	18	31	23	19	20
CH120	B2.2	000_0.1%Tw80	58	68	58	87	89	100	116	95	93	74	102	109	95	103	76	74	77	81	59	26	38	25	15	19	9	19	8	22	27	16	11	7	0	0	0	7	0	0	0	8	0	7	9	10	7	10	12
CH121	B2.3	000_0.1%Tw80	41	112	133	116	122	126	141	143	122	103	132	114	128	104	108	120	128	46	51	74	64	80	44	48	24	46	50	35	38	50	179	73	3	0	10	75	16	0	0	21	5	31	22	94	14	33	31
CH124	C2.0	004_750ug CBD in extract	31	46	16	17	0	0	0	0	0	0	0	0	0	0	0	0	0	0	0	0	0	0	0	1	0	0	0	0	0	0	0	0	0	0	0	0	0	0	0	0	0	0	0	0	0	0	0
CH125	C2.1	004_750ug CBD in extract	37	22	37	23	35	12	9	56	18	15	23	39	21	9	23	36	24	34	23	22	6	34	27	15	58	36	39	7	44	35	28	10	7	7	13	21	4	0	0	7	6	25	43	28	4	0	10
CH126	C2.2	004_750ug CBD in extract	30	24	21	33	14	11	8	5	39	44	32	50	46	47	40	13	30	21	26	39	44	33	36	19	30	43	25	46	7	4	1	9	11	39	31	20	22	18	9	0	0	0	0	3	0	34	3
CH128	A2.3	001_vehicle emulsion	44	57	18	26	25	42	56	67	54	61	40	45	59	60	59	55	34	16	31	17	3	17	13	11	12	2	10	24	27	9	3	0	0	4	5	0	3	1	1	5	0	5	19	24	8	25	21
CH129	A2.4	001_vehicle emulsion	35	57	42	27	42	44	53	48	91	81	73	63	71	71	71	48	45	24	27	29	23	10	4	28	4	5	8	8	36	11	2	1	3	0	1	2	15	11	6	19	13	11	21	16	19	8	13
CH130	A2.5	001_vehicle emulsion	75	126	87	84	84	92	98	100	124	116	118	113	102	100	83	86	65	40	54	54	61	51	10	24	14	14	17	3	4	14	24	44	40	159	98	25	37	7	0	0	0	12	18	17	10	24	16
CH131	A2.6	001_vehicle emulsion	55	99	95	109	105	116	124	114	138	145	138	141	118	128	93	124	93	101	66	77	84	62	58	43	37	12	17	8	17	3	13	4	0	5	6	5	12	2	4	18	6	57	29	33	27	40	32
CH132	A2.7	001_vehicle emulsion	1	0	0	0	0	0	1	0	0	0	0	0	0	1	1	0	1	0	1	1	0	0	0	0	0	0	1	0	0	0	0	0	0	0	0	0	1	0	0	0	0	0	0	0	0	1	2
CH134	B2.4	000_0.1%Tw80	46	47	29	32	43	30	49	67	97	93	96	81	81	115	85	96	51	29	35	15	10	3	24	10	8	16	4	4	5	14	6	3	0	4	0	13	25	0	11	0	13	9	11	21	17	37	25
CH135	B2.5	000_0.1%Tw80	35	65	14	38	51	29	29	56	66	51	82	63	58	60	77	56	56	50	36	12	9	8	5	1	3	1	6	22	6	5	8	5	1	3	4	0	0	1	0	3	7	11	6	11	12	29	26
CH136	B2.6	000_0.1%Tw80	79	98	94	83	99	100	100	123	99	102	106	98	126	87	91	85	50	69	49	26	29	30	36	30	32	2	14	64	7	7	26	17	4	11	0	0	32	5	8	3	8	9	13	6	24	23	38
CH137	B2.7	000_0.1%Tw80	55	101	125	108	123	115	117	135	132	104	123	133	112	97	107	125	112	127	65	50	62	52	92	104	54	39	26	24	5	8	2	3	4	5	14	10	23	17	8	9	6	13	19	37	22	69	48
CH139	C2.3	004_750ug CBD in extract	27	2	8	6	10	13	8	1	11	1	2	2	5	34	22	64	52	19	36	51	36	18	12	30	13	28	9	16	23	31	45	15	16	10	9	1	13	7	7	2	1	0	1	10	4	23	5
CH140	C2.4	004_750ug CBD in extract	21	15	24	43	47	28	28	54	35	10	32	39	22	55	10	6	20	14	54	39	21	16	39	26	36	36	37	12	87	58	19	21	13	3	0	23	85	12	2	23	26	0	0	0	0	4	16
CH141	C2.5	004_750ug CBD in extract	49	16	5	10	19	26	24	26	31	16	27	33	35	35	19	27	37	44	40	35	18	30	23	31	23	16	4	8	9	4	14	17	19	26	26	29	0	9	15	1	9	11	15	2	0	0	0
CH142	C2.6	004_750ug CBD in extract	88	49	39	32	20	14	36	34	33	35	33	28	33	25	51	38	57	45	60	35	34	47	24	11	40	25	17	37	42	90	92	16	29	48	72	12	39	7	0	0	3	4	2	0	6	21	0
CH143	C2.7	004_750ug CBD in extract	13	8	13	14	18	9	16	17	10	24	17	19	28	34	54	27	29	42	50	31	11	34	37	13	42	59	47	22	45	35	35	27	21	32	18	15	26	25	17	14	3	1	4	6	13	21	3
CH144	A2.8	001_vehicle emulsion	46	23	26	25	31	45	68	87	69	58	53	79	52	47	39	33	42	24	14	10	24	21	11	2	3	8	2	4	0	0	0	0	0	0	2	2	2	11	22	5	4	9	22	20	19	4	17
CH145	A2.9	001_vehicle emulsion	50	81	42	67	43	61	74	105	107	76	66	62	87	80	56	57	31	34	19	11	15	20	8	9	3	3	19	20	4	5	8	2	4	0	0	0	0	0	5	11	24	17	30	37	14	30	47
CH146	A2.10	001_vehicle emulsion	73	63	65	42	72	65	105	113	110	130	98	88	91	82	79	47	55	47	33	34	32	10	15	7	14	10	6	8	1	4	6	0	2	0	3	0	4	4	2	7	10	34	30	40	42	53	56
CH147	A2.11	001_vehicle emulsion	78	117	102	81	104	125	150	115	143	131	118	120	117	114	99	106	97	75	79	52	55	36	34	43	48	39	45	56	41	19	60	35	4	5	38	16	10	16	22	18	40	45	94	117	107	101	109
CH148	A2.12	001_vehicle emulsion	19	49	51	51	65	60	87	80	78	68	68	81	55	40	48	55	54	53	44	31	31	37	39	33	38	47	95	91	86	80	71	92	98	86	76	66	51	43	52	94	98	107	103	105	94	83	102
CH150	B2.8	000_0.1%Tw80	36	43	44	63	31	42	50	72	84	87	79	94	78	72	68	106	91	59	44	22	21	13	7	51	17	15	14	2	7	0	2	0	12	5	4	0	2	36	15	21	15	21	28	23	16	49	43
CH151	B2.9	000_0.1%Tw80	63	60	51	39	54	53	87	75	83	96	102	105	102	81	89	66	56	56	48	31	27	19	36	35	8	9	2	5	8	4	3	2	0	2	1	3	7	3	3	4	11	25	18	37	42	33	36
CH152	B2.10	000_0.1%Tw80	109	119	105	84	123	122	124	128	122	140	132	152	146	141	101	94	105	76	67	45	34	31	41	63	32	11	18	6	2	32	5	0	19	18	1	0	7	0	2	14	28	25	39	52	58	66	78
CH153	B2.11	000_0.1%Tw80	89	105	109	91	127	132	130	145	141	131	134	132	139	148	121	135	129	112	86	90	64	51	54	71	64	68	54	82	66	72	87	43	25	18	6	8	8	18	28	13	23	56	79	129	136	128	126
CH155	C2.8	004_750ug CBD in extract	22	13	9	3	2	12	11	8	16	10	42	3	22	22	52	41	6	35	67	92	61	55	34	39	46	30	31	10	36	1	4	15	25	51	9	2	15	20	53	21	36	36	67	54	26	29	15
CH156	C2.9	004_750ug CBD in extract	23	12	11	9	17	10	28	9	21	26	25	18	27	28	31	37	27	55	29	48	53	77	47	22	33	34	29	25	28	23	21	45	18	34	23	21	2	7	9	8	15	8	84	13	7	3	8
CH157	C2.10	004_750ug CBD in extract	70	33	44	58	40	42	30	57	22	81	99	103	86	37	69	34	25	60	54	104	26	21	15	25	57	29	18	54	52	28	44	39	29	8	17	7	13	24	16	47	10	67	14	2	3	4	5
CH158	C2.11	004_750ug CBD in extract	80	79	85	49	52	33	40	44	85	49	34	57	89	89	95	68	56	122	85	43	58	72	33	75	46	23	55	63	9	29	11	71	45	116	93	56	64	57	2	0	8	8	12	63	5	7	4
CH159	C2.12	004_750ug CBD in extract	56	63	100	45	52	32	63	32	44	83	86	48	83	103	65	67	95	81	69	90	122	126	110	160	79	95	87	119	66	83	152	100	164	125	108	119	149	127	140	193	151	189	173	140	153	154	137
CH160	A2.13	001_vehicle emulsion	23	46	43	32	39	45	83	81	76	76	99	71	100	88	91	77	55	38	39	47	89	86	56	33	39	34	7	5	8	0	3	0	0	1	5	5	1	5	2	3	4	45	14	25	19	17	5
CH161	A2.14	001_vehicle emulsion	49	49	37	58	70	67	70	71	87	86	100	82	69	45	62	60	41	57	14	20	16	9	33	9	10	10	24	11	8	14	0	0	3	3	4	5	1	2	0	23	19	20	22	19	28	16	11
CH162	A2.15	001_vehicle emulsion	49	69	48	95	84	94	85	96	103	114	116	114	117	92	104	105	113	82	34	33	25	25	16	14	13	4	12	9	6	6	3	0	9	3	0	2	2	4	11	20	40	51	60	94	87	113	89
CH163	A2.16	001_vehicle emulsion	35	65	92	92	90	97	66	89	99	78	69	73	72	51	45	63	82	81	110	41	26	61	61	62	76	76	73	125	128	167	194	185	179	150	152	156	157	146	202	207	218	209	215	194	198	153	142
CH166	B2.12	000_0.1%Tw80	28	46	62	50	52	61	82	95	104	116	103	76	95	82	83	97	57	79	107	109	43	29	11	26	32	57	22	11	4	4	5	6	1	30	136	115	61	22	7	12	33	39	39	48	69	61	87
CH167	B2.13	000_0.1%Tw80	40	85	62	54	58	73	66	70	85	81	100	86	69	62	82	62	51	56	33	54	83	34	31	14	23	11	18	12	5	2	1	4	2	1	0	0	2	0	0	10	20	20	35	33	57	53	53
CH168	B2.14	000_0.1%Tw80	47	61	78	78	69	66	75	73	94	78	103	113	82	70	60	86	74	66	60	85	46	32	41	18	33	26	15	33	11	14	30	23	10	1	11	9	6	3	10	17	49	84	115	91	89	115	113
CH169	B2.15	000_0.1%Tw80	63	107	117	112	111	132	121	108	115	124	123	127	105	123	108	114	114	106	125	150	131	96	124	151	117	159	175	197	208	190	211	204	214	241	230	225	238	224	231	225	218	208	203	210	202	178	186
CH172	C2.13	004_750ug CBD in extract	20	14	32	61	38	28	34	67	13	73	63	16	15	12	50	50	56	34	100	38	28	33	25	11	20	17	28	20	7	42	41	40	21	37	44	24	79	90	22	33	36	50	38	6	23	34	13
CH173	C2.14	004_750ug CBD in extract	64	29	32	26	23	31	11	13	38	48	40	9	29	51	28	16	18	53	34	39	45	59	55	39	14	36	35	30	32	61	47	21	54	29	39	54	14	13	6	18	46	8	26	71	33	15	1
CH174	C2.15	004_750ug CBD in extract	18	8	4	6	19	20	12	25	13	10	9	8	13	13	33	13	35	41	58	42	4	26	33	26	4	19	24	25	17	40	25	27	23	33	44	70	49	56	62	49	34	35	32	27	25	84	43
CH175	C2.16	004_750ug CBD in extract	13	2	2	5	11	3	8	2	6	4	3	6	3	10	11	15	20	18	22	33	13	15	21	17	18	21	16	27	20	34	43	27	52	25	30	52	50	42	56	66	85	82	118	103	50	65	62
CH208	A3.0	002_300ug CBD in extract	48	10	31	23	47	6	26	19	20	30	55	49	50	55	58	60	59	56	84	79	89	53	71	110	95	61	131	154	177	129	40	53	26	31	19	3	3	6	9	9	4	17	43	19	28	54	22
CH209	A3.1	002_300ug CBD in extract	26	54	19	46	65	60	63	45	33	33	46	50	61	65	62	43	65	41	53	30	57	24	36	27	47	24	50	108	113	118	114	22	12	10	23	29	80	71	92	182	226	214	234	173	144	131	46
CH210	A3.2	002_300ug CBD in extract	53	62	30	28	45	63	58	83	54	62	77	44	43	75	57	35	39	41	33	29	18	38	34	20	20	19	4	2	0	21	6	7	0	0	0	17	1	0	4	6	30	11	19	23	37	62	24
CH211	A3.3	002_300ug CBD in extract	50	32	13	47	68	73	83	83	95	76	77	97	67	70	74	112	53	72	130	107	69	29	29	45	70	84	34	29	61	28	100	108	162	95	25	46	108	94	41	57	55	17	16	19	49	93	145
CH214	B3.0	001_vehicle emulsion	40	47	28	41	51	75	76	86	88	83	86	83	90	56	91	76	70	56	27	51	55	48	89	26	33	12	29	38	120	114	127	63	60	127	116	118	5	1	51	14	11	9	69	67	53	22	38
CH215	B3.1	001_vehicle emulsion	69	72	46	38	59	65	74	82	96	86	69	76	52	59	83	58	60	55	66	14	15	19	13	8	0	2	20	49	26	25	5	23	1	8	6	2	0	4	0	10	3	9	7	10	12	7	13
CH216	B3.2	001_vehicle emulsion	49	78	64	86	78	57	77	77	96	88	80	56	59	52	56	73	47	61	40	49	99	43	34	30	21	62	6	9	25	27	8	2	4	2	9	0	10	0	3	1	6	9	11	7	11	13	11
CH217	B3.3	001_vehicle emulsion	55	85	111	113	118	100	104	104	105	94	89	82	70	63	56	62	44	59	72	37	47	48	42	37	35	11	68	39	28	15	25	11	8	5	20	2	1	3	2	17	12	30	19	52	29	32	29
CH220	C3.0	000_0.1%Tw80	44	38	47	24	32	31	15	33	54	57	54	76	71	39	46	78	80	82	52	41	60	72	27	11	8	24	51	22	3	1	25	5	0	1	4	0	8	2	0	4	1	15	44	10	6	18	10
CH221	C3.1	000_0.1%Tw80	49	76	48	51	52	57	49	32	60	59	72	73	98	95	102	90	132	221	157	74	32	38	50	62	25	36	33	37	0	20	19	0	4	0	0	1	0	23	48	2	10	7	11	11	6	13	21
CH222	C3.2	000_0.1%Tw80	59	81	70	57	73	74	72	77	94	104	99	99	94	91	101	78	64	53	83	51	25	22	24	24	34	9	6	11	8	12	16	78	44	1	12	8	14	4	1	2	15	1	7	85	2	12	16
CH223	C3.3	000_0.1%Tw80	56	98	137	140	152	122	132	112	138	114	136	132	115	94	93	106	99	90	52	49	27	31	30	9	7	0	14	9	0	22	0	53	53	7	19	0	0	3	4	11	13	1	14	3	12	23	14
CH224	A3.4	002_300ug CBD in extract	34	57	81	35	90	86	109	63	45	43	83	100	76	68	84	61	72	79	58	43	71	30	23	8	37	48	10	14	2	10	8	10	3	3	0	0	2	0	0	19	0	0	9	15	12	4	117
CH225	A3.5	002_300ug CBD in extract	57	87	75	81	55	79	136	80	52	81	42	62	72	47	73	81	64	68	44	53	35	44	91	41	34	17	11	21	2	0	2	28	40	2	7	6	0	2	0	4	10	2	22	37	16	4	62
CH226	A3.6	002_300ug CBD in extract	86	64	66	73	60	46	108	100	89	69	82	100	78	68	80	62	52	79	75	72	22	37	51	39	40	4	14	13	20	15	46	37	1	84	20	27	18	0	2	0	1	11	45	49	7	52	36
CH227	A3.7	002_300ug CBD in extract	36	19	12	9	14	39	46	54	48	86	64	64	54	62	52	56	72	58	28	19	6	19	31	23	11	28	14	31	10	19	20	17	5	5	7	7	5	0	7	2	2	9	21	20	30	23	68
CH228	A3.8	002_300ug CBD in extract	19	27	14	22	37	30	59	57	61	65	57	80	66	72	42	56	42	50	50	70	67	72	69	45	47	54	74	59	78	90	93	62	67	53	97	77	83	55	31	63	40	14	46	48	68	65	80
CH230	B3.4	001_vehicle emulsion	37	54	33	21	49	38	80	97	61	79	101	90	69	67	80	46	40	25	33	33	14	19	8	24	14	3	18	14	16	46	56	15	6	1	11	1	0	2	0	0	6	0	6	8	9	10	27
CH231	B3.5	001_vehicle emulsion	45	46	30	35	31	35	48	61	69	79	100	72	79	61	54	70	68	28	19	18	13	11	13	19	13	6	18	9	1	2	3	2	3	23	30	33	2	3	2	5	3	3	13	16	6	16	8
CH232	B3.6	001_vehicle emulsion	61	74	49	52	46	50	78	72	83	94	121	80	91	69	96	63	58	61	52	35	26	27	34	29	21	46	8	18	11	8	11	7	5	22	5	9	0	24	13	0	6	9	15	15	8	40	18
CH233	B3.7	001_vehicle emulsion	74	127	110	121	115	119	139	132	128	125	127	85	93	81	69	90	89	74	107	46	72	28	55	53	53	45	73	39	26	23	9	36	5	5	10	0	9	4	4	6	16	10	16	59	61	56	66
CH235	C3.4	000_0.1%Tw80	45	24	20	10	8	7	19	11	16	22	25	20	11	19	9	8	11	18	8	1	8	3	6	4	2	0	2	1	0	0	0	0	1	12	0	0	1	0	0	0	24	19	42	30	28	70	60
CH236	C3.5	000_0.1%Tw80	33	55	34	27	12	18	27	25	23	52	49	46	50	48	53	62	39	33	30	25	13	17	10	22	4	4	10	10	11	0	3	1	2	10	0	2	0	5	9	4	0	12	13	11	15	8	34
CH237	C3.6	000_0.1%Tw80	53	43	39	30	38	33	28	40	50	46	65	75	55	56	55	64	51	73	108	140	63	51	42	20	9	11	9	3	6	7	6	5	0	12	17	4	12	2	4	3	1	7	7	7	5	22	20
CH238	C3.7	000_0.1%Tw80	96	66	87	80	62	68	63	101	72	87	121	112	104	90	91	84	63	70	84	61	32	36	40	47	61	65	52	45	55	18	1	2	6	4	4	8	5	0	0	4	5	15	18	18	18	25	25
CH239	C3.8	000_0.1%Tw80	41	70	104	107	104	102	102	113	104	97	100	96	97	104	103	90	85	81	68	67	62	106	49	47	79	30	30	18	4	22	7	3	3	6	13	3	5	6	23	2	5	0	6	25	18	40	35
CH240	A3.9	002_300ug CBD in extract	27	44	37	53	68	64	39	71	32	55	64	57	74	79	84	80	77	56	53	59	45	67	74	85	38	40	13	20	45	27	24	0	0	5	3	23	0	0	2	1	6	2	13	5	51	48	98
CH241	A3.10	002_300ug CBD in extract	22	54	30	43	46	53	48	40	53	34	53	57	59	66	61	61	54	53	30	31	39	47	15	8	9	7	18	5	3	3	3	17	0	0	15	3	14	0	1	8	1	12	6	11	18	56	35
CH242	A3.11	002_300ug CBD in extract	30	29	9	16	26	32	41	68	69	72	62	61	52	67	60	64	48	49	47	23	42	25	19	15	16	39	15	8	37	47	55	8	0	6	16	31	22	9	2	17	13	36	11	20	43	96	58
CH243	A3.12	002_300ug CBD in extract	40	44	46	32	38	33	63	82	116	95	93	96	96	83	78	68	53	63	32	55	45	23	18	24	53	36	44	34	52	32	21	37	20	34	34	50	44	2	2	9	38	49	74	117	139	140	136
CH244	A3.13	002_300ug CBD in extract	9	8	4	9	11	17	26	41	47	38	35	44	50	59	63	57	62	76	81	64	56	44	48	44	47	60	37	50	59	54	49	52	49	44	42	32	18	39	64	66	112	96	109	97	115	95	105
CH246	B3.8	001_vehicle emulsion	36	70	60	57	66	73	103	120	114	112	90	88	71	85	89	64	91	83	63	31	39	19	14	21	88	18	38	40	82	20	8	39	5	0	6	2	6	0	1	18	70	72	18	24	82	66	14
CH247	B3.9	001_vehicle emulsion	52	40	44	43	21	63	95	102	100	76	90	86	102	74	73	66	75	49	24	28	30	17	5	17	22	11	9	10	17	5	4	10	4	2	1	0	0	4	3	4	6	9	21	16	20	25	23
CH248	B3.10	001_vehicle emulsion	42	45	47	29	57	40	40	69	94	95	78	72	80	76	76	55	48	28	43	47	19	13	12	12	16	19	16	51	41	120	40	12	5	17	11	3	1	9	12	12	26	16	23	39	42	46	31
CH249	B3.11	001_vehicle emulsion	48	110	102	116	110	133	140	139	130	136	127	119	98	88	72	89	101	70	66	74	88	69	98	65	76	106	75	129	125	126	94	117	128	42	31	38	21	34	31	30	44	66	116	112	135	137	161
CH251	C3.9	000_0.1%Tw80	16	15	8	9	15	17	16	26	46	47	37	71	57	82	94	82	77	93	97	134	43	28	32	33	24	49	46	48	64	98	134	186	129	124	70	83	29	28	136	77	9	40	77	49	71	75	86
CH252	C3.10	000_0.1%Tw80	37	50	47	22	27	22	26	30	61	70	71	69	66	82	79	77	54	43	39	20	48	24	22	21	36	23	26	15	7	8	6	0	3	0	2	0	8	31	2	1	5	12	11	14	19	22	34
CH253	C3.11	000_0.1%Tw80	55	52	45	34	41	39	27	52	83	70	88	63	59	89	108	93	80	83	77	34	36	22	30	21	7	5	23	16	8	0	14	7	6	0	1	3	8	4	3	1	5	19	12	35	14	32	16
CH254	C3.12	000_0.1%Tw80	89	94	84	87	81	88	123	119	108	125	102	113	113	97	123	119	83	77	104	86	84	69	67	37	94	227	209	114	58	26	22	29	22	9	8	6	10	8	11	3	10	15	11	20	39	58	64
CH255	C3.13	000_0.1%Tw80	91	94	132	128	122	113	109	126	118	121	120	116	114	109	96	120	104	113	148	117	62	89	81	66	56	73	123	97	87	154	189	168	162	123	126	87	104	52	90	75	90	65	145	115	106	125	100
CH257	A3.14	002_300ug CBD in extract	52	24	30	47	67	29	63	43	55	50	57	56	59	65	56	57	43	36	55	55	55	61	34	76	25	30	16	9	25	48	76	32	22	16	14	0	1	7	2	3	10	17	23	7	37	68	50
CH258	A3.15	002_300ug CBD in extract	43	40	21	11	28	39	51	49	76	71	62	77	34	76	80	47	55	98	53	28	37	11	24	30	11	46	38	18	4	7	14	112	62	12	8	3	19	12	2	9	8	59	30	22	21	32	38
CH259	A3.16	002_300ug CBD in extract	25	9	40	16	48	49	79	113	64	89	103	66	90	98	125	133	120	87	78	128	105	104	67	125	102	116	122	128	166	147	128	102	167	207	119	73	47	51	62	90	107	105	155	126	109	153	125
CH262	B3.12	001_vehicle emulsion	19	52	40	43	50	96	89	79	81	71	77	60	62	79	71	54	55	24	49	30	48	20	24	11	23	21	30	23	13	20	7	11	21	12	4	8	3	13	52	16	10	9	9	26	18	25	17
CH263	B3.13	001_vehicle emulsion	45	56	51	40	59	56	75	77	70	97	93	98	83	52	49	66	64	36	35	46	92	144	67	44	32	24	10	4	5	2	20	1	0	0	6	13	21	52	202	250	118	33	34	21	26	39	29
CH264	B3.14	001_vehicle emulsion	35	41	82	65	64	94	66	77	104	89	78	78	77	88	68	59	41	58	43	46	24	46	18	86	87	141	82	120	43	110	75	39	31	11	23	11	4	22	9	25	57	121	164	142	132	129	147
CH265	B3.15	001_vehicle emulsion	19	41	69	71	86	80	77	71	85	80	82	71	77	68	62	61	57	39	68	43	50	56	50	98	109	132	120	147	154	171	180	183	163	158	146	174	193	199	212	187	204	186	171	169	163	166	148
CH268	C3.14	000_0.1%Tw80	58	44	38	23	53	13	75	59	54	61	66	105	111	73	86	91	88	81	76	62	97	103	45	56	87	22	32	23	9	42	32	32	10	7	9	11	7	7	2	10	28	18	25	74	54	63	45
CH269	C3.15	000_0.1%Tw80	62	53	51	27	35	42	47	58	66	82	87	85	93	98	84	82	111	88	85	60	42	44	27	55	111	12	14	14	4	17	7	51	106	38	20	8	4	0	20	5	11	21	27	38	41	54	72
CH270	C3.16	000_0.1%Tw80	49	83	98	102	114	104	89	105	124	100	99	142	118	141	105	135	96	102	106	133	129	146	127	146	110	116	87	104	34	34	51	46	47	99	72	85	71	52	64	50	92	97	130	147	150	151	119
CH289	A4.0	003_500ug CBD in extract	11	5	3	2	0	2	2	4	7	5	7	10	13	23	26	16	30	20	16	8	8	11	4	10	9	8	12	19	13	8	10	16	7	8	21	7	16	9	13	24	1	10	2	6	11	2	2
CH290	A4.1	003_500ug CBD in extract	67	46	17	14	21	31	28	40	64	41	20	34	32	62	41	50	48	15	43	42	72	55	46	23	47	119	123	29	9	1	19	3	28	20	45	2	0	8	0	7	0	28	11	0	6	26	20
CH295	B4.0	002_300ug CBD in extract	25	33	49	29	62	28	40	55	63	46	74	53	77	82	75	82	71	60	55	61	42	50	37	51	54	45	62	117	74	110	105	39	12	1	5	0	1	22	44	6	15	13	41	56	25	48	30
CH296	B4.1	002_300ug CBD in extract	22	22	32	29	32	66	94	40	64	61	51	75	46	65	54	53	57	36	43	16	67	66	8	34	34	31	20	87	26	0	26	36	13	11	102	19	30	54	18	8	12	2	2	55	48	48	53
CH301	C4.0	001_vehicle emulsion	28	32	38	30	34	30	47	55	82	69	61	34	70	59	50	54	35	10	22	15	22	13	8	22	0	1	3	6	0	7	11	0	4	20	2	0	0	1	0	0	0	0	1	0	10	7	8
CH302	C4.1	001_vehicle emulsion	25	28	31	29	25	34	25	41	40	49	44	56	52	45	35	50	32	33	23	11	12	17	15	10	9	10	39	82	29	2	0	12	3	3	61	11	7	0	2	7	0	5	1	3	16	4	10
CH304	A4.2	003_500ug CBD in extract	46	22	19	18	32	21	21	18	55	16	26	30	23	55	55	35	48	38	31	64	28	43	25	45	55	19	18	19	18	20	24	42	29	113	144	193	94	41	154	144	166	144	166	110	68	97	34
CH305	A4.3	003_500ug CBD in extract	28	20	35	48	52	49	43	40	65	46	63	66	67	58	56	34	57	73	96	54	22	40	25	58	16	32	58	22	25	35	22	12	56	111	45	40	5	17	19	57	11	13	8	23	5	33	91
CH306	A4.4	003_500ug CBD in extract	53	40	37	49	66	80	51	63	63	61	51	26	53	106	82	36	81	138	85	69	26	60	41	57	16	82	46	16	32	23	34	31	13	17	20	37	22	19	7	8	14	10	31	21	49	7	8
CH307	A4.5	003_500ug CBD in extract	52	16	80	71	63	35	46	51	72	74	92	86	81	68	44	83	114	49	137	80	44	40	33	98	175	185	157	94	213	173	94	42	28	47	105	102	143	98	9	0	7	19	10	18	26	129	65
CH310	B4.2	002_300ug CBD in extract	43	36	50	11	33	61	29	8	21	64	52	71	70	87	76	105	89	80	73	63	50	61	42	16	71	107	59	67	86	122	219	244	245	205	181	69	17	24	61	66	98	77	114	130	91	135	130
CH311	B4.3	002_300ug CBD in extract	49	48	53	56	64	29	42	78	31	43	57	96	74	74	90	80	80	61	54	82	43	78	60	70	36	35	12	26	52	19	27	14	22	24	94	56	22	40	16	61	44	59	25	56	95	122	66
CH312	B4.4	002_300ug CBD in extract	51	41	39	45	54	102	100	94	101	63	57	63	74	72	60	43	37	56	57	82	53	61	60	83	26	32	44	138	136	9	17	70	15	18	17	6	8	4	5	11	43	44	34	27	11	56	20
CH313	B4.5	002_300ug CBD in extract	41	113	77	81	97	95	91	96	113	126	112	104	104	125	144	118	92	83	106	93	156	105	121	89	164	116	118	18	51	60	51	156	122	32	41	16	21	1	3	1	29	11	24	20	21	49	132
CH316	C4.2	001_vehicle emulsion	48	25	24	22	11	29	17	19	43	65	31	34	33	50	46	39	20	13	11	10	4	19	4	15	3	4	3	8	36	30	3	13	4	16	6	1	0	2	1	0	0	1	7	16	5	19	10
CH317	C4.3	001_vehicle emulsion	33	43	27	19	17	27	39	33	35	34	47	39	32	30	25	22	25	35	16	13	8	8	22	8	23	20	19	10	11	4	25	4	2	0	4	2	1	0	0	1	7	0	3	18	22	6	8
CH318	C4.4	001_vehicle emulsion	38	66	48	49	31	65	67	101	79	80	61	88	73	84	92	71	70	53	53	43	42	31	37	11	7	24	20	24	20	49	20	6	3	3	1	3	6	4	2	4	7	8	3	7	9	0	16
CH319	C4.5	001_vehicle emulsion	49	138	144	141	161	134	149	164	161	129	152	150	135	129	116	137	118	92	126	65	56	41	46	55	112	84	19	20	24	12	19	11	25	4	2	6	8	0	16	66	14	10	3	18	36	25	40
CH320	A4.6	003_500ug CBD in extract	31	34	64	65	18	26	57	32	30	28	20	37	63	25	45	33	25	49	56	77	35	53	35	22	7	39	39	44	38	28	24	0	19	47	41	9	2	0	0	0	0	0	0	2	68	2	15
CH321	A4.7	003_500ug CBD in extract	25	10	28	28	21	27	45	19	8	9	8	5	13	30	10	25	18	22	15	20	6	20	9	2	7	11	3	8	8	8	4	1	0	10	0	3	2	7	0	0	4	32	10	0	12	2	8
CH322	A4.8	003_500ug CBD in extract	59	63	52	71	53	32	42	39	44	13	16	21	21	57	54	25	36	26	35	24	37	22	11	19	9	26	25	34	30	12	19	36	14	0	1	6	0	2	0	5	4	0	0	0	13	18	23
CH323	A4.9	003_500ug CBD in extract	35	23	4	20	36	48	37	48	32	42	54	56	54	42	56	53	40	62	55	70	41	55	50	16	41	26	15	68	25	19	24	18	38	19	10	11	20	6	32	23	29	8	26	26	33	31	53
CH324	A4.10	003_500ug CBD in extract	64	27	35	67	36	37	80	70	99	82	80	100	109	116	135	118	142	112	83	98	104	54	44	94	74	50	53	108	118	110	117	149	133	127	117	115	115	125	76	117	142	101	46	84	65	109	110
CH326	B4.6	002_300ug CBD in extract	35	33	26	23	24	60	32	27	30	41	17	54	51	58	63	65	63	52	83	89	51	31	40	50	28	3	22	19	5	76	78	31	30	5	7	0	3	13	2	2	1	7	3	28	25	22	55
CH327	B4.7	002_300ug CBD in extract	48	45	66	37	47	53	38	52	57	59	53	65	30	63	45	57	82	53	73	47	41	52	27	42	22	55	53	10	20	9	20	22	10	7	10	0	2	9	1	4	8	32	35	28	19	50	19
CH328	B4.8	002_300ug CBD in extract	67	54	54	54	84	93	72	64	88	73	85	78	88	80	72	97	66	63	34	51	49	41	31	33	31	32	14	25	12	21	39	29	30	48	75	38	4	6	12	8	12	7	10	3	23	33	47
CH329	B4.9	002_300ug CBD in extract	80	99	59	70	108	89	108	126	134	136	133	103	100	92	87	72	84	71	113	54	105	95	73	58	76	87	53	61	56	84	50	65	22	72	81	41	31	3	13	6	18	97	12	50	74	116	90
CH331	C4.6	001_vehicle emulsion	25	19	13	11	5	7	10	13	29	37	37	63	54	41	35	30	33	49	42	36	18	28	20	20	17	13	16	55	141	159	43	2	8	13	8	6	2	10	1	6	6	2	9	8	11	12	26
CH332	C4.7	001_vehicle emulsion	25	33	29	15	10	15	17	20	41	37	23	46	40	25	27	18	8	23	7	10	3	10	7	1	15	15	9	10	12	5	0	0	0	5	0	2	0	0	0	0	0	6	1	7	6	12	13
CH333	C4.8	001_vehicle emulsion	60	72	33	43	33	32	32	48	60	64	66	62	58	69	61	32	39	46	32	29	33	9	26	13	9	3	16	28	1	4	3	3	3	22	12	0	4	0	0	0	2	3	17	19	26	20	51
CH334	C4.9	001_vehicle emulsion	73	126	80	71	66	50	74	79	93	105	107	101	76	71	83	82	53	58	46	63	22	53	34	31	63	35	29	14	8	27	48	79	59	31	0	14	48	44	1	8	1	7	2	13	14	25	35
CH335	C4.10	001_vehicle emulsion	52	80	109	121	93	99	120	117	124	122	136	124	125	118	112	104	97	142	151	188	184	156	152	163	197	120	68	58	23	14	22	6	6	6	8	3	2	6	5	8	4	9	6	27	33	56	57
CH336	A4.11	003_500ug CBD in extract	20	34	24	14	26	27	14	32	36	3	8	5	39	17	22	26	47	5	7	26	29	24	11	7	6	4	7	6	40	0	3	0	4	4	12	0	32	8	0	0	0	0	0	0	0	0	0
CH337	A4.12	003_500ug CBD in extract	27	34	15	40	35	24	19	11	6	6	16	5	13	14	30	20	27	22	27	14	34	17	14	10	18	0	0	9	0	2	0	0	1	4	2	0	0	2	3	0	0	19	9	0	43	30	0
CH338	A4.13	003_500ug CBD in extract	61	59	19	48	26	21	28	7	21	19	15	42	28	36	36	33	43	47	34	23	28	17	10	23	27	16	22	7	1	25	23	25	20	1	2	27	4	3	18	14	14	39	11	10	22	32	38
CH339	A4.14	003_500ug CBD in extract	45	45	20	48	48	38	28	26	65	73	90	62	91	86	37	59	52	61	72	65	78	65	35	86	111	89	60	89	84	80	41	110	85	115	77	79	107	49	22	76	16	42	51	55	86	118	139
CH342	B4.10	002_300ug CBD in extract	22	44	24	26	52	59	32	12	20	24	46	53	73	63	83	51	49	71	67	46	54	60	83	90	26	26	42	9	11	27	13	17	8	23	1	0	0	0	4	0	0	0	8	22	19	8	32
CH343	B4.11	002_300ug CBD in extract	33	21	18	34	36	45	56	45	26	15	19	25	22	41	52	44	45	29	47	24	45	40	11	24	37	45	36	17	16	25	18	14	3	3	9	3	9	14	4	2	10	1	7	19	14	43	34
CH344	B4.12	002_300ug CBD in extract	62	40	42	52	54	52	88	56	73	90	83	55	96	68	47	53	78	65	61	71	27	46	26	23	22	48	38	42	40	29	3	2	13	8	7	14	22	26	23	3	44	13	30	37	72	71	95
CH345	B4.13	002_300ug CBD in extract	50	29	41	62	85	73	87	105	106	81	104	111	62	83	77	64	71	70	58	35	24	77	78	42	80	51	75	27	78	54	59	69	72	90	109	102	66	22	22	20	40	111	154	182	151	152	143
CH348	C4.11	001_vehicle emulsion	29	33	39	6	14	28	26	30	44	35	45	46	59	41	47	27	20	15	42	23	7	26	9	6	5	2	12	0	10	10	7	1	2	3	8	8	6	16	0	2	9	47	14	31	41	40	27
CH349	C4.12	001_vehicle emulsion	66	106	39	31	27	42	31	35	51	58	67	56	60	51	46	49	30	57	50	35	33	8	18	29	24	13	38	22	41	23	45	31	48	9	0	0	1	2	0	1	4	22	4	15	35	17	40
CH350	C4.13	001_vehicle emulsion	77	101	81	106	93	94	75	91	100	87	84	92	72	85	87	81	67	52	44	50	49	42	33	44	48	10	10	71	19	70	35	45	32	17	34	88	134	58	13	26	34	29	69	59	49	68	68
CH351	C4.14	001_vehicle emulsion	78	84	124	135	136	105	118	128	124	152	128	127	137	121	115	127	117	111	109	147	122	113	103	132	153	145	137	186	201	186	182	190	192	190	192	223	193	135	149	102	128	142	183	158	141	167	158
CH353	A4.15	003_500ug CBD in extract	43	31	30	24	29	20	13	13	14	20	11	11	2	10	32	44	8	25	33	51	32	73	63	13	49	44	23	11	28	21	43	0	5	2	13	18	1	14	10	1	5	8	0	8	12	26	48
CH354	A4.16	003_500ug CBD in extract	31	16	41	16	18	8	15	24	31	64	18	29	47	36	23	28	43	63	61	51	53	28	14	35	29	43	7	21	38	25	19	49	52	101	25	9	10	105	48	5	11	43	33	26	7	42	37
CH359	B4.14	002_300ug CBD in extract	34	53	45	36	18	44	34	16	55	54	57	64	62	84	68	60	63	69	33	41	48	57	44	55	43	74	65	50	21	11	24	23	13	66	87	32	19	3	3	4	0	23	25	47	64	84	88
CH360	B4.15	002_300ug CBD in extract	29	28	35	17	57	28	56	43	82	43	32	71	35	49	67	43	60	48	34	52	39	31	65	35	29	17	40	52	35	60	115	152	154	58	38	117	119	72	43	15	38	48	31	29	40	39	55
CH365	C4.15	001_vehicle emulsion	51	60	42	20	43	30	60	65	71	94	101	80	61	86	54	57	50	50	67	44	42	90	33	22	78	81	72	57	46	70	8	17	18	9	8	4	3	5	10	3	2	10	18	48	45	35	17
CH366	C4.16	001_vehicle emulsion	39	65	85	82	82	83	101	102	94	96	105	104	73	90	91	72	70	87	56	46	55	96	24	37	20	13	15	34	38	32	30	37	67	38	49	39	19	52	103	70	144	209	214	214	223	217	175
[truncated: 119 more columns]

## Sheet: wDAT+ d1 ex1
DATE:	2023-10-25 17:52:56							Note that the two Tween 80 wells were accidentally combined here.
FILE:	C:\Users\wmicrotracker\Desktop\wmicrotracker\p00018\20231024_1703							Use well activity (lines 56 and 59) for analysis
SUBPROJECT:	2023 1024-25 wDAT+ CBD&extract ex1 d1 bL
<<<<<< Group Activity: Average Activity Counts per Data Interval>>>>>>
Group/Time[m]	30	60	90	120	150	180	210	240	270	300	330	360	390	420	450	480	510	540	570	600	630	660	690	720	750	780	810	840	870	900	930	960	990	1020	1050	1080	1110	1140	1170	1200	1230	1260	1290	1320	1350	1380	1410	1440	1470
VCe for bL	62	122	132	123	129	127	138	143	147	146	142	139	131	126	125	123	115	111	108	94	90	85	83	81	82	83	77	78	83	80	81	76	69	66	62	58	54	66	73	85	93	114	127	134	139	142	146	147	146
300ug CBD	54	63	61	75	79	98	105	114	111	116	115	118	116	107	104	100	101	88	86	79	78	75	72	72	63	68	68	68	71	72	72	68	72	80	84	70	64	56	58	68	65	70	69	82	97	105	103	106	121
500ug CBD	52	54	62	77	67	69	68	75	70	75	82	83	80	80	94	90	91	79	90	81	73	78	72	75	67	73	71	71	68	77	73	74	67	67	76	65	66	68	77	72	68	71	71	65	69	68	75	77	79
750 ug CBD	51	55	53	56	56	58	48	52	47	52	57	53	58	63	63	61	66	64	66	66	72	70	74	70	65	69	78	61	67	73	76	67	68	58	68	69	70	68	74	69	68	65	65	61	50	56	60	54	47
VCe for bR	76	129	130	118	102	90	97	114	126	140	146	147	138	137	133	131	130	124	128	120	116	103	100	107	102	103	101	113	104	112	112	104	99	94	80	76	79	81	89	98	119	132	142	145	156	160	160	162	168
300 in extract	62	78	69	72	89	96	109	106	105	110	122	126	134	131	131	124	117	110	110	118	98	108	106	106	110	95	107	107	100	102	103	92	112	99	107	107	94	91	70	74	73	77	88	96	109	116	129	126	137
500 in extract	52	70	64	66	69	64	55	67	74	74	85	82	88	95	95	100	101	100	103	102	100	101	102	99	110	109	109	110	110	102	99	104	89	100	100	112	97	96	99	98	93	96	92	84	85	75	86	85	97
750 in extract	65	80	69	69	77	70	77	65	68	72	76	81	86	76	69	69	81	87	70	78	80	88	85	87	77	83	86	92	98	96	94	95	99	89	89	94	90	94	78	99	88	84	84	89	105	106	102	93	80
0.1% Tw80	80	130	128	116	119	130	138	144	151	149	145	146	144	138	138	133	132	133	126	128	116	115	110	112	107	113	114	114	117	112	110	110	106	102	90	81	76	71	74	79	93	104	116	127	136	140	147	162	165
009_Group9	0	0	0	0	0	0	0	0	0	0	0	0	0	0	0	0	0	0	0	0	0	0	0	0	0	0	0	0	0	0	0	0	0	0	0	0	0	0	0	0	0	0	0	0	0	0	0	0	0
<<<<<< Group Activity: Standard Error >>>>>>
Group/Time[m]	30	60	90	120	150	180	210	240	270	300	330	360	390	420	450	480	510	540	570	600	630	660	690	720	750	780	810	840	870	900	930	960	990	1020	1050	1080	1110	1140	1170	1200	1230	1260	1290	1320	1350	1380	1410	1440	1470
000_vehicle emulsion	0	0	0	0	0	0	0	0	0	0	0	0	0	0	0	0	0	0	0	0	0	0	0	0	0	0	0	0	0	0	0	0	0	0	0	0	0	0	0	0	0	0	0	0	0	0	0	0	0
001_300ug CBD	0	0	0	0	0	0	0	0	0	0	0	0	0	0	0	0	0	0	0	0	0	0	0	0	0	0	0	0	0	0	0	0	0	0	0	0	0	0	0	0	0	0	0	0	0	0	0	0	0
002_500ug CBD	0	0	0	0	0	0	0	0	0	0	0	0	0	0	0	0	0	0	0	0	0	0	0	0	0	0	0	0	0	0	0	0	0	0	0	0	0	0	0	0	0	0	0	0	0	0	0	0	0
003_750 ug CBD	0	0	0	0	0	0	0	0	0	0	0	0	0	0	0	0	0	0	0	0	0	0	0	0	0	0	0	0	0	0	0	0	0	0	0	0	0	0	0	0	0	0	0	0	0	0	0	0	0
004_VC 3k worms	0	0	0	0	0	0	0	0	0	0	0	0	0	0	0	0	0	0	0	0	0	0	0	0	0	0	0	0	0	0	0	0	0	0	0	0	0	0	0	0	0	0	0	0	0	0	0	0	0
005_300ug extract	0	0	0	0	0	0	0	0	0	0	0	0	0	0	0	0	0	0	0	0	0	0	0	0	0	0	0	0	0	0	0	0	0	0	0	0	0	0	0	0	0	0	0	0	0	0	0	0	0
006_500ug extract	0	0	0	0	0	0	0	0	0	0	0	0	0	0	0	0	0	0	0	0	0	0	0	0	0	0	0	0	0	0	0	0	0	0	0	0	0	0	0	0	0	0	0	0	0	0	0	0	0
007_750ug extract	0	0	0	0	0	0	0	0	0	0	0	0	0	0	0	0	0	0	0	0	0	0	0	0	0	0	0	0	0	0	0	0	0	0	0	0	0	0	0	0	0	0	0	0	0	0	0	0	0
008_0.1% Tw80	2.1	0.7	0.7	2.1	5.7	4.2	3.5	2.8	4.2	0.7	0.7	2.1	3.5	2.8	8.5	7.8	8.5	7.8	12.7	13.4	14.8	17	19.1	13.4	14.1	16.3	15.6	9.2	9.2	11.3	14.1	10.6	16.3	17.7	11.3	9.2	11.3	9.9	10.6	11.3	12.7	8.5	14.8	11.3	2.1	4.9	0	0.7	2.1
009_Group9	0	0	0	0	0	0	0	0	0	0	0	0	0	0	0	0	0	0	0	0	0	0	0	0	0	0	0	0	0	0	0	0	0	0	0	0	0	0	0	0	0	0	0	0	0	0	0	0	0
<<<<<< Group Activity: Number of wells/group >>>>>>
Group/Time[m]	30	60	90	120	150	180	210	240	270	300	330	360	390	420	450	480	510	540	570	600	630	660	690	720	750	780	810	840	870	900	930	960	990	1020	1050	1080	1110	1140	1170	1200	1230	1260	1290	1320	1350	1380	1410	1440	1470
000_vehicle emulsion	1	1	1	1	1	1	1	1	1	1	1	1	1	1	1	1	1	1	1	1	1	1	1	1	1	1	1	1	1	1	1	1	1	1	1	1	1	1	1	1	1	1	1	1	1	1	1	1	1
001_300ug CBD	1	1	1	1	1	1	1	1	1	1	1	1	1	1	1	1	1	1	1	1	1	1	1	1	1	1	1	1	1	1	1	1	1	1	1	1	1	1	1	1	1	1	1	1	1	1	1	1	1
002_500ug CBD	1	1	1	1	1	1	1	1	1	1	1	1	1	1	1	1	1	1	1	1	1	1	1	1	1	1	1	1	1	1	1	1	1	1	1	1	1	1	1	1	1	1	1	1	1	1	1	1	1
003_750 ug CBD	1	1	1	1	1	1	1	1	1	1	1	1	1	1	1	1	1	1	1	1	1	1	1	1	1	1	1	1	1	1	1	1	1	1	1	1	1	1	1	1	1	1	1	1	1	1	1	1	1
004_VC 3k worms	1	1	1	1	1	1	1	1	1	1	1	1	1	1	1	1	1	1	1	1	1	1	1	1	1	1	1	1	1	1	1	1	1	1	1	1	1	1	1	1	1	1	1	1	1	1	1	1	1
005_300ug extract	1	1	1	1	1	1	1	1	1	1	1	1	1	1	1	1	1	1	1	1	1	1	1	1	1	1	1	1	1	1	1	1	1	1	1	1	1	1	1	1	1	1	1	1	1	1	1	1	1
006_500ug extract	1	1	1	1	1	1	1	1	1	1	1	1	1	1	1	1	1	1	1	1	1	1	1	1	1	1	1	1	1	1	1	1	1	1	1	1	1	1	1	1	1	1	1	1	1	1	1	1	1
007_750ug extract	1	1	1	1	1	1	1	1	1	1	1	1	1	1	1	1	1	1	1	1	1	1	1	1	1	1	1	1	1	1	1	1	1	1	1	1	1	1	1	1	1	1	1	1	1	1	1	1	1
008_0.1% Tw80	2	2	2	2	2	2	2	2	2	2	2	2	2	2	2	2	2	2	2	2	2	2	2	2	2	2	2	2	2	2	2	2	2	2	2	2	2	2	2	2	2	2	2	2	2	2	2	2	2
009_Group9	2	2	2	2	2	2	2	2	2	2	2	2	2	2	2	2	2	2	2	2	2	2	2	2	2	2	2	2	2	2	2	2	2	2	2	2	2	2	2	2	2	2	2	2	2	2	2	2	2
<<<<<< Number of Samples per Acquisition Interval [1unit=500values] >>>>>>
Time[m]	30	60	90	120	150	180	210	240	270	300	330	360	390	420	450	480	510	540	570	600	630	660	690	720	750	780	810	840	870	900	930	960	990	1020	1050	1080	1110	1140	1170	1200	1230	1260	1290	1320	1350	1380	1410	1440	1470
#Samples	30	30	30	30	30	30	30	30	30	30	30	30	30	30	30	30	30	30	30	30	30	30	30	30	30	30	30	30	30	30	30	30	30	30	30	30	30	30	30	30	30	30	30	30	30	30	30	30	30
<<<<<< Average Temperature [°C] >>>>>>
Time[m]	30	60	90	120	150	180	210	240	270	300	330	360	390	420	450	480	510	540	570	600	630	660	690	720	750	780	810	840	870	900	930	960	990	1020	1050	1080	1110	1140	1170	1200	1230	1260	1290	1320	1350	1380	1410	1440	1470
Temp[°C]	21.5	21.5	21.5	21.7	21.7	21.7	21.7	21.7	21.7	21.7	21.7	21.7	21.7	21.7	21.7	21.7	21.7	21.7	21.7	21.7	21.7	21.7	21.7	21.7	21.7	21.7	21.7	21.7	21.7	21.7	21.7	21.7	21.7	21.7	21.7	21.7	21.7	21.7	21.7	21.7	21.7	21.7	21.7	21.7	21.7	21.7	21.7	21.7	21.7
<<<<<< Well Activity >>>>>>
Well	Group/Time[m]	30	60	90	120	150	180	210	240	270	300	330	360	390	420	450	480	510	540	570	600	630	660	690	720	750	780	810	840	870	900	930	960	990	1020	1050	1080	1110	1140	1170	1200	1230	1260	1290	1320	1350	1380	1410	1440
A1	000_vehicle emulsion	62	122	132	123	129	127	138	143	147	146	142	139	131	126	125	123	115	111	108	94	90	85	83	81	82	83	77	78	83	80	81	76	69	66	62	58	54	66	73	85	93	114	127	134	139	142	146	147
B1	004_VC 3k worms	76	129	130	118	102	90	97	114	126	140	146	147	138	137	133	131	130	124	128	120	116	103	100	107	102	103	101	113	104	112	112	104	99	94	80	76	79	81	89	98	119	132	142	145	156	160	160	162
C1	008_0.1% Tw80	82	131	128	118	125	134	141	146	155	148	146	144	147	136	129	125	124	125	114	115	102	98	91	99	93	97	99	105	108	100	96	100	89	84	79	72	65	61	63	68	80	96	101	116	134	135	147	161
A2	001_300ug CBD	54	63	61	75	79	98	105	114	111	116	115	118	116	107	104	100	101	88	86	79	78	75	72	72	63	68	68	68	71	72	72	68	72	80	84	70	64	56	58	68	65	70	69	82	97	105	103	106
B2	005_300ug extract	62	78	69	72	89	96	109	106	105	110	122	126	134	131	131	124	117	110	110	118	98	108	106	106	110	95	107	107	100	102	103	92	112	99	107	107	94	91	70	74	73	77	88	96	109	116	129	126
C2	008_0.1% Tw80	78	130	127	114	113	126	134	141	147	150	144	148	140	141	146	141	141	141	139	142	131	132	129	126	121	129	130	124	126	123	124	121	122	119	102	90	88	81	84	90	106	113	130	138	138	145	147	163
A3	002_500ug CBD	52	54	62	77	67	69	68	75	70	75	82	83	80	80	94	90	91	79	90	81	73	78	72	75	67	73	71	71	68	77	73	74	67	67	76	65	66	68	77	72	68	71	71	65	69	68	75	77
B3	006_500ug extract	52	70	64	66	69	64	55	67	74	74	85	82	88	95	95	100	101	100	103	102	100	101	102	99	110	109	109	110	110	102	99	104	89	100	100	112	97	96	99	98	93	96	92	84	85	75	86	85
C3	009_Group9	0	0	0	0	0	0	0	0	0	0	0	0	0	0	0	0	0	0	0	0	0	0	0	0	0	0	0	0	0	0	0	0	0	0	0	0	0	0	0	0	0	0	0	0	0	0	0	0
A4	003_750 ug CBD	51	55	53	56	56	58	48	52	47	52	57	53	58	63	63	61	66	64	66	66	72	70	74	70	65	69	78	61	67	73	76	67	68	58	68	69	70	68	74	69	68	65	65	61	50	56	60	54
B4	007_750ug extract	65	80	69	69	77	70	77	65	68	72	76	81	86	76	69	69	81	87	70	78	80	88	85	87	77	83	86	92	98	96	94	95	99	89	89	94	90	94	78	99	88	84	84	89	105	106	102	93
C4	009_Group9	0	0	0	0	0	0	0	0	0	0	0	0	0	0	0	0	0	0	0	0	0	0	0	0	0	0	0	0	0	0	0	0	0	0	0	0	0	0	0	0	0	0	0	0	0	0	0	0
<<<<<< Channel Activity >>>>>>
Channel	Well	Group/Time[m]	30	60	90	120	150	180	210	240	270	300	330	360	390	420	450	480	510	540	570	600	630	660	690	720	750	780	810	840	870	900	930	960	990	1020	1050	1080	1110	1140	1170	1200	1230	1260	1290	1320	1350	1380	1410
CH17	A1.0	000_vehicle emulsion	57	104	123	114	118	112	120	121	128	137	133	138	130	115	122	157	132	152	142	141	124	136	160	159	156	161	134	166	161	123	165	214	162	157	123	118	53	113	98	136	106	145	136	153	171	176	154
CH18	A1.1	000_vehicle emulsion	48	134	153	136	131	124	130	121	155	142	126	130	118	111	152	158	142	170	151	164	131	135	148	147	156	128	119	126	122	133	106	112	104	56	45	16	16	55	67	68	79	100	155	152	121	184	197
CH23	B1.0	004_VC 3k worms	56	115	109	90	59	72	70	54	64	92	94	124	96	103	84	74	80	69	93	87	80	52	43	49	51	27	33	67	60	83	54	29	8	8	28	34	13	32	33	22	24	47	43	71	66	90	137
CH24	B1.1	004_VC 3k worms	47	140	152	121	127	111	98	118	119	118	135	141	129	122	98	75	120	67	127	89	106	56	54	48	53	83	57	88	72	59	30	31	26	24	97	61	81	89	164	181	199	108	75	94	65	90	98
CH29	C1.0	008_0.1% Tw80	146	142	124	112	117	128	134	130	171	158	133	131	129	87	79	63	96	41	61	44	45	31	18	23	46	72	46	25	61	53	27	91	66	20	19	23	17	9	5	11	11	40	15	33	52	51	61
CH30	C1.1	008_0.1% Tw80	46	130	155	136	141	136	153	162	164	127	107	99	111	106	98	81	81	65	51	78	53	39	42	60	23	61	45	116	97	75	69	73	46	83	85	68	56	25	19	16	47	48	44	35	62	70	83
CH32	A1.2	000_vehicle emulsion	65	123	94	81	75	100	134	134	138	129	119	125	110	113	102	94	102	108	93	82	106	51	42	53	33	47	52	55	78	42	61	54	29	13	26	32	57	68	64	68	95	117	92	88	88	112	135
CH33	A1.3	000_vehicle emulsion	54	110	120	86	79	83	114	122	112	122	119	105	100	92	94	94	96	55	47	50	29	24	49	36	27	34	23	28	26	23	27	15	12	2	3	7	3	10	25	37	31	63	51	57	59	91	89
CH34	A1.4	000_vehicle emulsion	61	134	125	135	133	149	150	163	148	143	143	128	116	108	75	67	71	72	42	57	16	40	17	17	16	25	22	8	36	20	11	18	3	6	14	4	12	2	33	19	37	69	46	69	76	91	92
CH35	A1.5	000_vehicle emulsion	98	142	157	160	166	167	175	158	159	165	153	152	126	133	143	119	71	105	90	62	31	29	46	55	39	39	47	41	49	47	33	32	24	14	8	3	15	30	43	66	64	119	116	164	170	152	152
CH38	B1.2	004_VC 3k worms	74	144	122	105	110	72	103	105	116	161	155	165	137	136	136	125	86	97	143	100	68	36	84	100	71	68	78	69	78	100	152	74	48	65	7	14	61	44	70	37	52	88	131	120	131	123	141
CH39	B1.3	004_VC 3k worms	55	139	107	88	75	50	74	76	75	107	134	120	114	117	92	99	115	76	77	70	47	29	16	24	16	42	47	27	28	22	40	10	32	56	23	33	4	1	26	8	25	47	65	68	104	122	138
CH40	B1.4	004_VC 3k worms	93	142	118	123	119	125	125	133	166	164	170	162	157	140	123	131	107	120	96	59	58	26	49	56	35	24	72	33	37	37	29	50	21	3	9	9	11	1	12	26	26	53	74	101	145	150	150
CH41	B1.5	004_VC 3k worms	81	139	143	159	148	124	146	174	184	191	187	174	148	147	130	142	120	152	99	108	93	101	71	67	87	78	63	98	75	114	74	64	57	50	27	23	15	38	45	58	71	83	131	158	141	172	148
CH44	C1.2	008_0.1% Tw80	92	126	92	70	61	69	81	114	153	170	184	210	178	180	162	134	140	118	117	108	124	71	63	80	71	51	54	43	66	44	60	80	65	25	30	36	11	2	7	6	18	24	32	32	87	78	102
CH45	C1.3	008_0.1% Tw80	59	118	100	75	84	124	135	130	143	144	144	102	110	87	89	70	56	68	58	47	32	29	27	15	14	28	30	57	37	46	27	17	29	32	25	5	7	0	9	10	14	22	22	50	85	52	73
CH46	C1.4	008_0.1% Tw80	70	113	109	116	126	156	159	146	151	151	134	116	128	86	86	69	79	65	48	42	21	18	17	27	31	25	42	20	21	21	13	32	10	12	2	3	5	26	1	9	10	27	61	77	90	102	134
CH47	C1.5	008_0.1% Tw80	58	150	182	200	214	210	207	193	189	179	173	157	167	161	131	155	133	158	129	141	131	138	124	110	84	128	128	110	138	90	108	87	118	60	24	42	60	13	38	85	64	70	93	96	115	145	193
CH48	A1.6	000_vehicle emulsion	38	92	103	80	75	76	74	117	134	136	129	141	148	161	141	126	160	139	109	81	117	81	66	58	78	80	107	88	114	128	154	94	60	61	57	24	24	26	75	130	137	138	167	180	172	174	167
CH49	A1.7	000_vehicle emulsion	37	102	130	71	110	112	119	166	149	142	143	146	139	118	94	87	103	94	86	45	54	47	57	26	59	78	51	14	11	16	37	9	27	18	0	2	2	7	23	50	48	76	80	90	93	82	111
CH50	A1.8	000_vehicle emulsion	80	152	153	154	163	163	177	175	177	174	175	153	145	122	107	104	81	87	70	53	45	47	22	16	23	31	15	7	9	9	7	13	4	7	0	3	7	5	11	33	34	45	65	85	87	83	81
CH51	A1.9	000_vehicle emulsion	92	156	187	200	207	196	198	204	194	207	175	172	168	166	163	136	111	71	121	82	57	65	30	39	41	30	32	29	23	41	29	27	10	9	21	4	1	28	25	36	76	109	124	129	174	154	151
CH52	A1.10	000_vehicle emulsion	65	114	134	142	173	144	147	140	156	128	145	143	125	139	141	124	130	136	157	100	123	138	128	129	147	154	126	154	153	159	131	112	171	150	150	171	165	145	151	148	181	178	185	182	170	181	189
CH54	B1.6	004_VC 3k worms	65	121	107	108	88	44	47	50	59	86	103	125	110	124	135	125	110	125	115	122	129	112	117	137	125	114	122	168	148	128	104	146	144	115	130	155	128	125	116	122	173	139	162	114	175	159	164
CH55	B1.7	004_VC 3k worms	57	132	125	110	67	65	55	85	95	140	145	140	124	136	128	120	112	112	111	93	78	87	50	73	140	67	45	54	40	56	75	60	39	17	6	22	19	25	12	65	79	97	105	138	148	177	137
CH56	B1.8	004_VC 3k worms	62	101	136	106	112	114	125	163	153	154	153	164	151	144	141	131	130	109	101	90	91	57	67	46	55	37	42	40	23	51	46	42	49	31	16	6	7	20	10	48	52	136	139	168	178	172	175
CH57	B1.9	004_VC 3k worms	108	163	146	132	157	167	176	198	207	211	207	190	198	166	187	164	178	151	164	175	173	137	130	141	110	152	65	130	107	77	157	143	112	145	83	32	76	65	37	71	136	190	199	207	223	207	178
CH59	C1.6	008_0.1% Tw80	59	116	99	40	59	47	88	109	115	134	141	156	149	152	166	163	138	171	168	177	173	144	160	174	159	160	172	179	206	182	187	198	186	202	202	203	201	208	202	221	207	209	206	208	208	208	198
CH60	C1.7	008_0.1% Tw80	127	117	106	81	75	89	79	153	117	111	123	140	137	136	139	148	141	138	95	114	79	93	73	107	97	89	109	113	109	131	99	87	63	56	55	27	47	15	15	34	81	71	81	125	116	122	138
CH61	C1.8	008_0.1% Tw80	65	92	89	91	109	136	124	144	157	132	152	139	141	115	98	81	83	87	79	71	55	41	28	36	30	44	47	26	35	12	12	27	22	40	23	8	3	7	3	15	50	73	36	58	72	64	109
CH62	C1.9	008_0.1% Tw80	70	142	149	162	165	167	169	164	175	147	155	128	115	129	93	91	73	79	68	88	58	46	40	33	30	32	35	32	40	45	40	58	12	13	3	10	6	3	5	9	12	33	68	89	104	131	135
CH63	C1.10	008_0.1% Tw80	80	179	199	182	203	197	212	205	196	180	174	154	190	153	150	146	152	161	129	152	84	136	107	138	136	124	109	128	117	155	141	121	104	112	85	50	24	78	47	71	94	130	142	184	215	207	220
CH64	A1.11	000_vehicle emulsion	73	119	139	125	133	116	154	139	158	136	149	147	142	135	151	178	162	157	189	182	196	183	163	160	158	162	167	186	182	216	191	196	232	207	194	212	190	203	207	199	185	168	200	197	203	188	210
CH65	A1.12	000_vehicle emulsion	83	119	123	123	129	111	127	139	132	126	130	132	131	119	111	129	102	83	80	54	67	72	68	58	43	46	24	32	36	34	42	35	23	13	16	13	17	21	23	50	83	95	119	98	135	137	110
CH66	A1.13	000_vehicle emulsion	63	151	161	145	144	178	171	163	181	197	177	155	156	156	120	114	81	81	94	53	21	24	46	27	40	28	44	19	10	3	34	2	2	12	29	6	3	20	13	39	32	49	86	118	132	102	126
CH67	A1.14	000_vehicle emulsion	46	118	133	131	153	137	148	139	133	147	155	138	116	111	119	118	119	96	89	102	91	58	68	72	64	50	58	51	45	28	29	27	8	26	16	16	7	26	24	29	64	111	160	157	144	161	171
CH70	B1.10	004_VC 3k worms	153	166	132	105	78	56	71	78	99	123	138	137	126	125	147	147	160	131	130	151	155	157	150	159	129	166	168	164	181	160	180	185	200	197	198	201	241	230	217	185	219	203	204	184	186	188	182
CH71	B1.11	004_VC 3k worms	58	132	145	105	68	56	37	88	103	120	158	143	135	140	137	150	137	152	145	142	153	115	148	139	144	153	141	169	145	184	167	160	168	143	56	41	64	46	80	106	139	176	196	185	199	195	223
CH72	B1.12	004_VC 3k worms	58	103	119	147	89	89	96	137	153	168	171	183	187	208	205	195	213	209	206	202	174	188	161	167	147	141	162	160	152	182	141	161	159	116	86	69	78	44	54	70	130	167	193	191	167	178	181
CH73	B1.13	004_VC 3k worms	111	98	184	192	193	193	191	190	192	160	168	163	164	182	165	188	180	180	167	188	197	181	174	189	189	193	195	202	176	168	187	175	187	150	130	133	123	152	156	181	188	209	187	180	183	192	172
CH76	C1.11	008_0.1% Tw80	128	169	112	98	86	96	113	138	136	151	144	163	162	158	157	150	177	176	174	195	180	177	175	166	161	172	168	183	173	170	194	200	197	190	195	160	99	65	162	149	171	172	193	184	182	190	164
CH77	C1.12	008_0.1% Tw80	62	91	116	99	83	123	148	129	136	149	110	155	146	141	136	139	152	120	134	95	72	57	72	94	83	73	79	109	97	60	62	44	63	40	27	24	2	12	8	14	29	54	64	105	139	144	147
CH78	C1.13	008_0.1% Tw80	100	146	127	166	215	185	176	177	171	171	155	153	161	152	141	151	151	144	122	97	107	91	88	82	77	69	90	118	117	114	91	73	48	58	26	38	12	16	4	10	18	53	123	148	191	216	200
CH79	C1.14	008_0.1% Tw80	100	138	171	166	175	176	176	161	180	160	168	143	162	180	173	165	148	176	188	171	170	184	162	179	178	172	165	192	151	148	176	192	153	164	196	199	190	174	167	125	156	200	169	174	192	188	191
CH81	A1.15	000_vehicle emulsion	30	73	71	54	62	49	71	91	107	109	110	119	123	99	131	146	134	156	128	133	172	142	135	169	168	150	150	167	154	157	161	174	138	173	187	204	196	196	193	169	163	162	166	158	166	143	145
CH82	A1.16	000_vehicle emulsion	70	123	130	150	147	135	136	138	144	146	139	133	132	141	152	143	161	131	141	158	146	170	165	154	154	161	142	157	195	189	159	155	170	192	173	154	145	172	168	167	167	201	207	195	207	202	197
CH87	B1.14	004_VC 3k worms	43	103	96	57	48	33	50	67	87	94	84	97	87	78	81	97	113	98	119	111	122	132	120	142	117	138	139	165	164	175	174	168	157	191	187	185	184	188	192	179	184	164	160	166	187	179	173
CH88	B1.15	004_VC 3k worms	92	124	135	143	95	64	89	105	145	150	140	120	138	123	140	132	117	132	148	135	135	181	165	182	169	165	185	180	175	189	189	174	176	186	192	196	162	192	193	202	201	200	203	178	190	172	171
CH93	C1.15	008_0.1% Tw80	77	136	109	88	99	100	95	101	123	122	146	155	148	151	159	151	141	170	164	160	171	188	180	180	185	165	171	165	189	182	183	187	187	185	187	194	215	209	207	205	192	204	198	185	186	158	173
CH94	C1.16	008_0.1% Tw80	62	120	143	118	114	133	141	130	151	129	142	150	164	137	140	167	172	180	161	171	185	188	168	183	183	188	185	165	182	179	138	138	150	142	152	142	150	171	179	160	190	196	176	188	187	170	181
CH113	A2.0	001_300ug CBD	57	83	59	137	98	130	87	100	66	99	92	146	134	128	98	117	90	142	100	135	106	116	106	125	77	131	95	139	150	125	146	162	169	154	125	144	87	58	97	97	141	167	144	174	209	174	208
CH114	A2.1	001_300ug CBD	63	47	54	72	67	80	121	105	109	87	110	112	112	96	70	76	53	32	70	34	33	23	48	74	32	5	24	23	21	33	27	21	48	58	78	19	14	10	8	38	64	60	59	101	135	176	118
CH115	A2.2	001_300ug CBD	83	64	76	37	53	75	101	104	111	95	125	111	114	92	86	97	153	76	85	123	104	113	112	101	123	74	64	66	97	81	110	112	101	107	101	113	120	65	91	66	37	45	90	88	114	128	121
CH118	B2.0	005_300ug extract	42	94	85	53	52	93	105	57	51	76	121	116	134	134	144	127	130	107	128	148	114	126	108	169	141	126	114	136	97	121	35	55	160	94	140	84	88	32	20	46	44	67	76	23	47	74	46
CH119	B2.1	005_300ug extract	53	44	27	41	67	62	76	74	48	74	84	97	96	119	110	108	85	81	89	145	97	64	85	84	103	45	85	43	122	110	97	83	82	100	106	97	74	129	83	54	78	66	61	101	89	79	106
CH120	B2.2	005_300ug extract	75	107	42	80	117	103	140	101	119	106	99	115	143	123	129	133	125	100	113	83	49	63	125	90	60	64	74	127	121	118	132	110	109	80	155	159	59	50	46	29	97	78	92	78	97	136	101
CH121	B2.3	005_300ug extract	101	76	75	84	91	106	122	105	126	106	109	86	102	116	124	82	77	107	110	105	90	120	152	90	109	68	94	135	37	115	169	144	117	127	117	120	87	116	93	135	136	156	79	46	28	66	107
CH124	C2.0	008_0.1% Tw80	139	165	143	131	100	120	131	157	164	173	176	172	164	148	136	143	150	133	182	171	177	189	184	172	189	196	171	150	168	184	193	182	178	192	172	181	231	171	177	209	166	165	176	186	186	161	130
CH125	C2.1	008_0.1% Tw80	99	151	140	125	131	130	135	159	190	211	217	212	177	189	174	215	180	193	193	187	175	207	183	232	186	214	202	184	183	175	185	146	122	124	161	79	75	23	26	16	51	54	47	56	84	63	74
CH126	C2.2	008_0.1% Tw80	94	167	139	157	145	170	176	185	179	174	161	148	160	149	154	152	142	113	59	96	76	53	97	135	105	149	211	217	153	184	191	164	158	211	174	159	155	178	171	187	207	182	159	157	97	120	105
CH128	A2.3	001_300ug CBD	54	55	86	107	144	140	139	142	146	136	121	116	83	132	110	116	115	110	80	71	82	77	54	40	66	54	62	19	85	56	39	17	58	54	57	35	18	36	54	37	36	22	22	29	44	50	23
CH129	A2.4	001_300ug CBD	54	77	51	59	100	105	107	107	131	98	109	112	108	79	96	74	86	89	66	41	62	38	33	32	28	33	20	48	17	25	3	65	24	20	22	3	1	40	15	8	13	8	6	24	28	54	72
CH130	A2.5	001_300ug CBD	41	56	22	69	70	66	85	94	101	92	95	85	92	99	78	71	61	50	55	24	11	22	31	35	7	6	30	7	15	62	15	36	12	0	39	12	5	2	4	11	0	11	9	16	17	13	33
CH131	A2.6	001_300ug CBD	54	59	72	58	79	119	132	159	160	170	151	151	157	126	132	70	97	88	73	71	41	44	59	22	33	42	27	36	34	26	20	0	28	26	44	52	26	17	7	21	17	14	11	37	69	56	54
CH132	A2.7	001_300ug CBD	41	50	41	69	47	105	93	111	115	116	110	106	120	116	132	116	108	104	128	73	115	114	156	116	122	136	110	125	106	92	147	144	130	159	164	170	142	166	167	180	168	137	137	143	120	109	110
CH134	B2.4	005_300ug extract	44	50	55	51	70	53	87	86	78	60	95	114	126	101	120	110	124	126	106	132	74	98	93	90	87	52	87	52	65	92	72	69	97	45	39	55	67	37	8	26	9	10	36	107	30	43	141
CH135	B2.5	005_300ug extract	27	71	33	53	79	114	109	83	100	80	98	127	114	140	121	109	127	98	100	95	62	67	110	76	70	46	77	66	67	104	81	46	81	30	81	51	84	63	12	7	27	36	43	33	37	62	103
CH136	B2.6	005_300ug extract	57	73	73	47	90	81	110	111	133	123	139	127	152	144	123	126	113	98	88	144	75	59	50	104	127	75	107	93	89	62	116	22	46	66	68	22	69	68	55	72	104	148	102	76	93	130	99
CH137	B2.7	005_300ug extract	51	61	82	66	76	112	118	135	154	162	174	147	157	149	171	139	137	127	96	129	95	153	112	96	132	79	102	133	97	64	71	51	72	63	74	138	117	152	102	38	16	7	87	102	142	107	139
CH139	C2.3	008_0.1% Tw80	33	75	55	31	41	62	81	76	100	83	80	105	113	118	109	111	120	100	105	101	108	85	78	98	110	125	154	152	135	145	144	132	149	154	135	129	135	162	168	147	154	156	167	144	159	132	137
CH140	C2.4	008_0.1% Tw80	88	163	120	102	102	95	142	148	169	181	177	201	196	224	236	234	250	233	225	242	217	178	190	184	183	181	209	229	216	200	197	195	191	172	160	176	164	140	128	190	219	229	242	222	233	202	193
CH141	C2.5	008_0.1% Tw80	47	121	109	95	84	94	95	117	93	114	103	97	95	98	113	105	129	153	131	164	138	131	118	94	101	129	69	69	82	62	49	45	44	41	33	8	3	11	8	5	7	29	54	53	83	67	126
CH142	C2.6	008_0.1% Tw80	104	136	160	151	145	155	165	164	149	177	162	163	154	149	170	182	176	176	163	147	128	166	140	106	83	109	103	70	81	76	61	50	71	42	31	15	11	13	10	41	36	29	61	82	98	140	140
CH143	C2.7	008_0.1% Tw80	41	82	141	139	150	152	139	151	136	137	123	137	113	118	149	116	117	140	116	127	133	178	194	109	119	131	98	97	114	93	110	102	109	89	68	81	62	27	25	72	83	59	108	104	122	138	115
CH144	A2.8	001_300ug CBD	55	60	97	104	84	100	114	119	80	96	95	117	116	82	92	144	124	103	88	105	58	26	51	82	65	66	66	18	67	30	54	50	64	29	17	28	47	47	1	15	18	4	9	12	17	48	28
CH145	A2.9	001_300ug CBD	39	50	49	61	36	107	105	114	84	102	105	106	114	89	116	100	109	61	69	56	75	67	47	33	36	31	61	9	10	11	36	23	11	72	46	31	33	4	2	60	56	6	15	6	15	51	11
CH146	A2.10	001_300ug CBD	51	38	45	34	62	92	88	89	105	115	122	114	106	103	93	84	63	59	56	66	19	4	16	10	15	7	16	43	6	16	18	13	26	11	10	7	1	2	3	2	3	0	25	3	13	47	35
CH147	A2.11	001_300ug CBD	61	72	59	94	100	93	130	156	166	154	144	127	130	124	109	87	110	66	76	74	77	52	74	32	19	20	21	57	85	66	14	28	21	20	25	2	0	9	6	52	8	11	12	43	104	105	116
CH148	A2.12	001_300ug CBD	48	57	59	73	96	104	104	115	109	122	111	119	113	120	131	103	102	129	139	124	147	121	121	149	144	143	121	132	114	142	116	110	131	127	145	130	129	110	131	158	134	173	168	180	157	131	104
CH150	B2.8	005_300ug extract	59	94	87	110	114	103	112	124	109	98	107	140	138	151	134	154	134	152	138	122	144	128	92	115	110	145	126	106	97	75	76	114	114	125	128	95	60	36	27	119	34	52	44	105	138	139	129
CH151	B2.9	005_300ug extract	50	75	51	76	91	87	112	108	100	141	102	120	145	138	130	129	121	116	114	99	81	107	83	60	50	60	45	69	41	65	85	78	72	33	29	66	63	33	19	37	29	17	68	37	84	115	115
CH152	B2.10	005_300ug extract	73	65	40	44	96	83	100	119	115	116	113	145	133	130	128	117	89	77	74	89	39	97	101	82	95	65	68	92	74	100	75	53	106	77	85	34	15	95	47	15	9	4	13	26	104	68	126
CH153	B2.11	005_300ug extract	99	116	71	121	114	145	145	153	138	147	157	160	161	141	141	117	122	124	119	123	140	140	123	116	146	138	144	91	141	110	107	97	105	144	45	104	115	28	70	39	15	32	36	88	151	134	104
CH155	C2.8	008_0.1% Tw80	64	90	62	54	38	74	73	88	94	104	93	103	93	119	105	119	122	117	126	107	97	97	86	113	122	116	127	140	136	147	171	162	186	192	172	164	184	192	191	173	180	169	164	173	164	166	149
CH156	C2.9	008_0.1% Tw80	86	119	102	91	92	91	116	134	142	144	135	170	180	166	196	179	188	195	203	184	173	195	177	172	196	147	142	128	140	168	146	102	104	123	146	150	111	136	126	46	69	95	143	189	131	157	166
CH157	C2.10	008_0.1% Tw80	60	124	112	111	90	111	109	143	144	123	130	133	126	92	112	100	96	81	108	99	94	94	54	54	67	57	50	51	80	78	93	156	164	129	19	15	19	13	12	4	20	18	23	91	76	107	119
CH158	C2.11	008_0.1% Tw80	81	112	108	102	126	126	130	144	131	128	117	126	92	112	108	88	94	101	81	99	68	71	101	63	40	47	78	92	60	73	51	78	99	82	41	25	28	21	32	101	169	131	106	82	98	127	149
CH159	C2.12	008_0.1% Tw80	61	151	191	155	185	196	172	154	168	170	145	149	133	138	159	157	149	157	176	166	158	130	148	156	162	120	151	128	115	89	103	111	108	104	58	26	82	27	54	42	85	135	166	188	182	197	192
CH160	A2.13	001_300ug CBD	26	46	43	44	58	60	47	35	44	61	40	87	92	79	106	104	120	104	123	117	122	133	111	111	105	135	154	167	147	142	151	156	162	158	137	174	177	186	178	167	192	177	166	172	185	171	167
CH161	A2.14	001_300ug CBD	67	71	39	89	97	98	106	88	113	137	127	119	113	117	92	82	83	72	88	29	69	57	54	85	30	94	87	97	68	125	145	64	65	88	165	56	97	50	76	114	40	133	74	126	152	151	192
CH162	A2.15	001_300ug CBD	55	89	75	63	58	97	109	162	142	168	149	147	140	110	101	123	111	100	56	84	59	97	51	27	27	30	46	28	31	43	51	30	35	71	34	13	1	29	15	11	14	26	32	87	106	144	146
CH163	A2.16	001_300ug CBD	74	97	103	102	95	90	110	136	111	131	147	123	126	121	119	129	134	106	112	118	141	165	93	143	136	149	144	144	151	143	138	123	135	198	221	198	188	125	124	119	166	188	195	154	164	178	208
CH166	B2.12	005_300ug extract	31	51	87	75	66	59	45	65	37	52	83	78	98	89	107	111	116	76	93	119	117	103	117	108	103	145	125	141	107	108	128	112	151	148	184	156	157	156	153	159	140	166	175	181	186	164	183
CH167	B2.13	005_300ug extract	88	126	129	104	129	134	132	123	122	119	161	153	143	164	146	144	130	138	151	120	122	144	86	111	163	137	147	110	160	134	159	132	162	158	149	157	150	153	44	142	126	101	180	182	187	184	205
CH168	B2.14	005_300ug extract	84	82	82	89	104	130	138	152	159	181	184	166	180	146	146	143	124	116	116	112	120	130	132	160	131	128	142	149	133	116	85	146	159	157	152	165	108	140	137	93	112	115	141	181	159	168	200
CH169	B2.15	005_300ug extract	55	63	81	51	61	68	86	96	96	115	121	123	122	118	119	128	125	117	117	128	152	132	129	146	126	145	169	170	152	138	158	156	161	140	154	204	188	163	200	177	199	182	174	172	177	195	165
CH172	C2.13	008_0.1% Tw80	103	141	141	102	111	127	148	150	166	164	155	167	153	162	163	161	157	170	148	181	160	140	162	156	146	158	143	127	116	119	102	104	105	64	82	98	69	59	18	33	56	136	156	126	156	157	159
CH173	C2.14	008_0.1% Tw80	139	153	154	99	115	123	149	151	169	178	172	178	173	206	167	138	119	117	130	113	116	97	90	90	86	73	59	60	78	75	69	100	91	102	75	27	9	21	24	29	56	53	91	122	139	166	168
CH174	C2.15	008_0.1% Tw80	72	161	183	185	163	205	186	181	185	202	189	173	157	133	153	119	122	133	130	112	114	114	88	86	60	78	108	67	132	74	76	88	43	65	17	38	13	19	54	54	61	100	159	187	182	207	208
CH175	C2.16	008_0.1% Tw80	22	101	107	109	100	117	124	102	116	90	111	85	95	80	75	75	81	84	86	111	99	111	106	128	100	157	130	150	157	141	161	134	160	139	196	162	143	159	210	188	184	179	182	179	159	166	164
CH208	A3.0	002_500ug CBD	100	124	130	85	101	157	137	117	43	59	54	90	104	65	156	125	144	155	195	178	177	213	206	171	192	168	178	183	166	150	187	167	189	105	176	161	137	175	147	190	196	231	201	201	247	240	233
CH209	A3.1	002_500ug CBD	49	34	72	97	40	101	112	143	107	132	128	91	115	137	127	126	106	98	70	50	69	40	58	50	75	75	64	57	59	54	19	67	49	26	57	62	52	45	86	69	27	109	87	71	140	87	116
CH210	A3.2	002_500ug CBD	22	41	43	64	74	47	38	49	39	68	83	76	117	96	97	84	88	72	74	59	43	27	16	30	10	29	18	20	9	26	5	26	16	8	10	13	16	0	21	37	7	6	48	0	22	33	35
CH211	A3.3	002_500ug CBD	39	48	61	66	30	8	33	44	54	68	74	86	68	58	83	121	81	75	79	74	89	62	57	47	33	81	58	60	20	67	113	112	58	46	49	44	62	23	16	8	35	37	6	13	30	29	31
CH214	B3.0	006_500ug extract	100	111	84	70	58	45	29	71	54	59	39	77	79	87	75	93	112	82	108	97	98	97	110	107	125	118	94	116	142	78	59	75	57	126	81	82	96	71	43	50	77	58	62	21	55	22	14
CH215	B3.1	006_500ug extract	52	92	149	97	121	115	123	141	114	134	117	103	123	116	117	141	99	69	118	129	116	120	90	69	107	125	95	93	67	116	69	119	63	34	88	106	41	91	36	80	58	28	54	6	72	61	112
CH216	B3.2	006_500ug extract	60	98	51	72	53	74	33	61	121	69	79	110	111	117	134	112	92	140	112	99	78	99	75	138	138	110	88	74	123	112	129	86	104	94	114	153	56	62	51	17	40	26	67	74	51	26	26
CH217	B3.3	006_500ug extract	76	82	95	68	104	65	81	76	70	65	71	77	80	81	89	110	130	114	128	110	111	103	98	119	114	123	115	211	132	98	162	161	151	141	147	145	116	155	157	167	163	145	199	166	164	186	193
CH220	C3.0	009_Group9	0	0	0	0	0	0	0	0	0	0	0	0	0	0	0	0	0	0	0	0	0	0	0	0	0	0	0	0	0	0	0	0	0	0	0	0	0	0	0	0	0	0	0	0	0	0	0
CH221	C3.1	009_Group9	0	0	0	0	0	0	0	0	0	0	0	0	0	0	0	0	0	0	0	0	0	0	0	0	0	0	0	0	0	0	0	0	0	0	0	0	0	0	0	0	0	0	0	0	0	0	0
CH222	C3.2	009_Group9	0	0	0	0	0	0	0	0	0	0	0	0	0	0	0	0	0	0	0	0	0	0	0	0	0	0	0	0	0	0	0	0	0	0	0	0	0	0	0	0	0	0	0	0	0	0	0
CH223	C3.3	009_Group9	0	0	0	0	0	0	0	0	0	0	0	0	0	0	0	0	0	0	0	0	0	0	0	0	0	0	0	0	0	0	0	0	0	0	0	0	0	0	0	0	0	0	0	0	0	0	0
CH224	A3.4	002_500ug CBD	62	71	122	162	174	141	114	160	130	115	74	91	76	79	87	63	70	45	66	79	34	63	46	82	36	31	15	29	39	68	25	15	34	27	76	18	7	7	17	19	2	6	0	4	3	0	1
CH225	A3.5	002_500ug CBD	47	29	31	38	38	41	42	50	55	57	41	40	55	49	40	43	34	37	15	15	8	14	43	11	17	15	5	6	26	27	2	9	4	15	15	32	15	3	20	1	0	0	0	0	0	0	0
CH226	A3.6	002_500ug CBD	47	57	34	70	40	34	29	47	37	46	50	53	40	54	56	45	45	62	46	32	19	28	16	18	1	25	6	12	13	18	32	18	11	8	9	6	21	14	30	11	5	10	10	0	1	4	0
CH227	A3.7	002_500ug CBD	74	54	50	54	45	45	53	48	88	90	79	61	74	107	107	108	104	99	86	81	75	101	64	75	34	94	58	55	33	67	27	13	17	44	46	47	67	53	32	61	60	103	86	21	19	1	48
CH228	A3.8	002_500ug CBD	60	70	61	77	88	73	95	105	120	95	121	106	97	128	119	131	114	87	137	151	155	136	125	161	155	120	155	149	125	155	151	156	154	124	141	107	131	192	112	118	106	96	94	63	69	129	116
CH230	B3.4	006_500ug extract	41	60	38	92	57	48	39	52	52	54	54	63	47	86	70	81	60	108	103	91	107	91	127	100	104	102	125	91	88	76	74	82	82	80	49	62	66	94	92	105	60	99	126	98	60	96	13
CH231	B3.5	006_500ug extract	25	40	10	31	39	34	25	27	64	61	74	49	68	51	66	33	72	75	59	71	73	73	79	61	79	75	95	47	79	32	31	50	55	55	37	52	64	46	41	97	66	25	23	6	22	16	15
CH232	B3.6	006_500ug extract	50	58	46	23	58	35	38	68	47	49	50	70	67	93	85	85	97	92	87	95	82	80	101	89	68	101	148	72	103	121	111	100	25	79	99	116	94	56	105	85	146	84	78	32	12	24	92
CH233	B3.7	006_500ug extract	19	45	64	69	78	64	88	65	75	90	91	105	122	133	113	129	115	137	112	111	90	114	115	99	103	78	107	103	64	83	111	111	70	59	89	66	79	81	108	81	50	61	44	9	88	57	79
CH235	C3.4	009_Group9	0	0	0	0	0	0	0	0	0	0	0	0	0	0	0	0	0	0	0	0	0	0	0	0	0	0	0	0	0	0	0	0	0	0	0	0	0	0	0	0	0	0	0	0	0	0	0
CH236	C3.5	009_Group9	0	0	0	0	0	0	0	0	0	0	0	0	0	0	0	0	0	0	0	0	0	0	0	0	0	0	0	0	0	0	0	0	0	0	0	0	0	0	0	0	0	0	0	0	0	0	0
CH237	C3.6	009_Group9	0	0	0	0	0	0	0	0	0	0	0	0	0	0	0	0	0	0	0	0	0	0	0	0	0	0	0	0	0	0	0	0	0	0	0	0	0	0	0	0	0	0	0	0	0	0	0
CH238	C3.7	009_Group9	0	0	0	0	0	0	0	0	0	0	0	0	0	0	0	0	0	0	0	0	0	0	0	0	0	0	0	0	0	0	0	0	0	0	0	0	0	0	0	0	0	0	0	0	0	0	0
CH239	C3.8	009_Group9	0	0	0	0	0	0	0	0	0	0	0	0	0	0	0	0	0	0	0	0	0	0	0	0	0	0	0	0	0	0	0	0	0	0	0	0	0	0	0	0	0	0	0	0	0	0	0
CH240	A3.9	002_500ug CBD	71	95	98	144	128	139	147	145	120	93	90	108	70	87	59	84	91	80	131	100	71	115	128	73	103	119	83	121	133	128	118	107	110	159	117	89	58	65	153	153	180	126	98	103	126	60	69
CH241	A3.10	002_500ug CBD	27	22	41	66	62	38	26	48	32	50	79	70	54	17	62	60	77	56	67	45	26	44	43	33	29	29	14	7	12	4	23	9	7	30	15	7	19	15	34	3	10	14	2	14	8	19	8
CH242	A3.11	002_500ug CBD	47	51	55	71	51	61	29	13	18	37	40	65	41	49	89	60	65	49	67	48	24	35	32	34	23	58	51	5	35	18	86	64	40	93	79	4	59	52	59	38	2	0	19	5	23	28	16
CH243	A3.12	002_500ug CBD	70	70	72	53	45	65	73	49	68	96	125	119	106	113	123	120	123	94	120	94	84	120	75	95	54	69	100	87	131	115	83	105	88	88	84	59	36	55	68	71	29	36	97	31	18	55	75
CH244	A3.13	002_500ug CBD	17	10	10	25	35	33	50	77	88	58	80	54	62	61	92	65	77	65	83	93	115	94	98	119	120	108	133	134	116	124	111	87	91	117	102	128	123	116	141	145	141	127	137	162	160	156	165
CH246	B3.8	006_500ug extract	64	71	74	65	84	99	64	79	32	44	33	39	73	67	81	98	121	107	132	114	117	78	82	100	100	96	84	99	78	156	90	133	41	106	98	176	147	86	164	85	92	133	91	91	22	26	6
CH247	B3.9	006_500ug extract	63	50	39	44	62	48	44	63	57	75	89	61	74	71	76	65	97	83	116	84	84	81	82	49	87	92	102	110	118	116	69	78	77	68	71	103	100	59	93	56	82	64	46	23	54	33	56
CH248	B3.10	006_500ug extract	67	95	32	48	55	62	54	45	101	91	125	101	104	89	104	119	116	112	95	126	103	115	93	109	155	147	112	110	116	99	128	108	80	103	88	100	95	92	65	106	69	111	77	90	66	80	84
CH249	B3.11	006_500ug extract	22	44	106	119	99	53	28	50	91	102	144	143	112	166	121	128	136	134	160	119	137	126	137	114	152	99	114	141	102	121	143	121	118	156	161	176	173	160	188	149	140	188	117	143	161	128	144
CH251	C3.9	009_Group9	0	0	0	0	0	0	0	0	0	0	0	0	0	0	0	0	0	0	0	0	0	0	0	0	0	0	0	0	0	0	0	0	0	0	0	0	0	0	0	0	0	0	0	0	0	0	0
CH252	C3.10	009_Group9	0	0	0	0	0	0	0	0	0	0	0	0	0	0	0	0	0	0	0	0	0	0	0	0	0	0	0	0	0	0	0	0	0	0	0	0	0	0	0	0	0	0	0	0	0	0	0
CH253	C3.11	009_Group9	0	0	0	0	0	0	0	0	0	0	0	0	0	0	0	0	0	0	0	0	0	0	0	0	0	0	0	0	0	0	0	0	0	0	0	0	0	0	0	0	0	0	0	0	0	0	0
CH254	C3.12	009_Group9	0	0	0	0	0	0	0	0	0	0	0	0	0	0	0	0	0	0	0	0	0	0	0	0	0	0	0	0	0	0	0	0	0	0	0	0	0	0	0	0	0	0	0	0	0	0	0
CH255	C3.13	009_Group9	0	0	0	0	0	0	0	0	0	0	0	0	0	0	0	0	0	0	0	0	0	0	0	0	0	0	0	0	0	0	0	0	0	0	0	0	0	0	0	0	0	0	0	0	0	0	0
CH257	A3.14	002_500ug CBD	42	54	75	45	56	64	39	42	39	72	109	105	75	88	59	82	141	111	111	92	78	80	83	95	69	84	113	69	53	98	91	94	97	88	110	131	171	143	147	86	119	37	112	128	82	70	116
CH258	A3.15	002_500ug CBD	30	26	37	56	41	67	37	32	69	44	69	85	97	83	133	98	80	73	72	72	29	42	31	41	61	7	13	37	20	33	12	32	19	7	46	60	25	56	92	77	68	70	8	106	57	61	73
CH259	A3.16	002_500ug CBD	74	69	60	128	91	57	110	99	78	101	95	111	111	85	103	114	99	88	108	107	144	107	105	136	123	129	138	168	164	154	154	172	148	149	159	135	121	147	129	143	171	206	203	191	175	192	179
CH262	B3.12	006_500ug extract	25	64	46	70	68	42	54	53	40	36	40	10	49	52	59	86	56	36	54	52	54	65	78	68	43	88	126	117	114	48	93	74	119	96	113	101	109	106	76	107	90	126	148	151	84	94	111
CH263	B3.13	006_500ug extract	96	112	97	88	57	105	60	60	102	124	163	115	88	106	130	108	110	105	111	110	107	146	123	121	128	161	140	170	150	101	85	160	143	149	125	118	94	153	126	97	84	126	93	155	147	80	134
CH264	B3.14	006_500ug extract	38	81	60	71	59	97	82	117	98	80	109	123	146	107	108	124	128	111	79	95	106	134	101	130	121	122	100	86	128	140	97	68	102	132	93	88	74	101	95	144	119	87	84	87	117	116	125
CH265	B3.15	006_500ug extract	26	25	36	31	56	44	40	43	62	56	78	68	72	93	87	91	81	96	77	133	143	92	133	113	133	107	102	117	156	131	133	144	133	126	143	147	150	122	144	143	153	171	166	190	186	154	180
CH268	C3.14	009_Group9	0	0	0	0	0	0	0	0	0	0	0	0	0	0	0	0	0	0	0	0	0	0	0	0	0	0	0	0	0	0	0	0	0	0	0	0	0	0	0	0	0	0	0	0	0	0	0
CH269	C3.15	009_Group9	0	0	0	0	0	0	0	0	0	0	0	0	0	0	0	0	0	0	0	0	0	0	0	0	0	0	0	0	0	0	0	0	0	0	0	0	0	0	0	0	0	0	0	0	0	0	0
CH270	C3.16	009_Group9	0	0	0	0	0	0	0	0	0	0	0	0	0	0	0	0	0	0	0	0	0	0	0	0	0	0	0	0	0	0	0	0	0	0	0	0	0	0	0	0	0	0	0	0	0	0	0
CH289	A4.0	003_750 ug CBD	8	25	6	12	33	34	37	15	16	37	29	17	29	47	56	52	40	48	51	71	104	77	47	63	61	30	53	28	54	49	107	118	102	26	106	89	86	119	123	63	102	119	111	81	67	107	138
CH290	A4.1	003_750 ug CBD	79	100	34	76	62	81	63	85	104	109	125	108	152	122	153	120	130	110	104	131	128	92	92	131	111	119	168	130	137	150	140	157	98	98	143	143	135	146	164	137	106	109	69	82	75	78	108
CH295	B4.0	007_750ug extract	41	71	23	48	72	53	51	26	49	39	41	69	58	52	37	31	45	69	46	69	54	83	95	90	78	118	109	98	111	138	117	120	161	131	154	155	120	123	129	122	120	144	100	142	140	140	125
CH296	B4.1	007_750ug extract	85	94	62	103	83	96	165	98	106	64	140	119	56	102	168	151	88	70	96	112	138	102	102	146	174	175	143	162	185	166	141	174	163	109	176	133	139	145	147	214	167	129	117	130	151	194	185
CH301	C4.0	009_Group9	0	0	0	0	0	0	0	0	0	0	0	0	0	0	0	0	0	0	0	0	0	0	0	0	0	0	0	0	0	0	0	0	0	0	0	0	0	0	0	0	0	0	0	0	0	0	0
CH302	C4.1	009_Group9	0	0	0	0	0	0	0	0	0	0	0	0	0	0	0	0	0	0	0	0	0	0	0	0	0	0	0	0	0	0	0	0	0	0	0	0	0	0	0	0	0	0	0	0	0	0	0
CH304	A4.2	003_750 ug CBD	66	71	87	94	71	106	93	83	77	130	87	142	88	122	73	85	65	64	77	70	127	163	147	158	183	154	141	144	190	136	134	140	119	99	145	127	173	167	171	150	159	171	186	186	193	208	197
CH305	A4.3	003_750 ug CBD	35	55	58	45	42	28	10	19	34	17	36	38	29	36	37	31	72	61	56	60	79	104	53	51	55	47	57	50	43	50	46	31	34	82	53	38	68	60	64	75	23	11	6	20	31	32	44
CH306	A4.4	003_750 ug CBD	41	61	51	66	74	32	55	58	29	43	46	55	69	33	46	37	34	27	73	41	66	19	27	26	50	65	54	31	21	31	22	18	33	26	20	26	15	8	63	55	7	11	24	16	11	8	3
CH307	A4.5	003_750 ug CBD	69	66	96	68	101	102	125	75	66	34	70	93	62	83	110	66	126	111	121	120	141	106	136	73	70	70	103	79	93	132	137	71	80	135	114	138	72	62	80	113	100	84	77	67	24	36	60
CH310	B4.2	007_750ug extract	85	143	128	89	82	101	112	75	64	86	120	123	143	58	53	82	113	108	46	108	105	91	160	74	78	105	143	132	169	173	172	196	154	123	120	133	132	112	96	173	116	190	150	199	179	171	207
CH311	B4.3	007_750ug extract	57	85	67	56	103	74	69	90	38	67	95	70	112	152	49	87	140	137	71	80	106	126	147	106	68	86	113	78	133	110	84	58	66	103	81	93	103	96	112	124	86	102	97	135	158	175	162
CH312	B4.4	007_750ug extract	56	69	63	64	63	44	115	72	90	69	50	64	78	69	85	64	77	72	79	70	96	76	57	62	64	62	95	107	83	73	68	93	80	98	99	41	114	125	86	65	71	100	113	79	62	94	88
CH313	B4.5	007_750ug extract	60	87	96	67	63	75	123	44	64	67	61	80	134	122	81	107	146	98	85	104	141	138	134	98	103	99	78	85	94	110	131	97	97	162	146	156	126	85	107	100	84	104	134	93	99	138	109
CH316	C4.2	009_Group9	0	0	0	0	0	0	0	0	0	0	0	0	0	0	0	0	0	0	0	0	0	0	0	0	0	0	0	0	0	0	0	0	0	0	0	0	0	0	0	0	0	0	0	0	0	0	0
CH317	C4.3	009_Group9	0	0	0	0	0	0	0	0	0	0	0	0	0	0	0	0	0	0	0	0	0	0	0	0	0	0	0	0	0	0	0	0	0	0	0	0	0	0	0	0	0	0	0	0	0	0	0
CH318	C4.4	009_Group9	0	0	0	0	0	0	0	0	0	0	0	0	0	0	0	0	0	0	0	0	0	0	0	0	0	0	0	0	0	0	0	0	0	0	0	0	0	0	0	0	0	0	0	0	0	0	0
CH319	C4.5	009_Group9	0	0	0	0	0	0	0	0	0	0	0	0	0	0	0	0	0	0	0	0	0	0	0	0	0	0	0	0	0	0	0	0	0	0	0	0	0	0	0	0	0	0	0	0	0	0	0
CH320	A4.6	003_750 ug CBD	74	68	78	53	66	72	39	47	82	141	129	114	103	146	155	139	127	170	108	80	80	100	147	155	92	88	133	122	67	148	104	133	99	112	163	118	152	169	136	61	139	129	94	166	79	9	13
CH321	A4.7	003_750 ug CBD	66	49	51	40	28	37	35	60	40	30	31	32	45	45	50	30	40	23	39	34	43	33	46	16	16	59	32	15	21	35	18	5	37	10	15	13	19	34	6	19	5	3	17	2	5	2	3
CH322	A4.8	003_750 ug CBD	24	29	13	27	15	11	4	4	6	6	11	4	5	23	3	10	7	19	6	25	25	20	8	28	10	19	21	12	14	23	21	16	1	6	3	9	16	4	2	2	2	0	1	1	0	0	4
CH323	A4.9	003_750 ug CBD	47	69	58	53	50	36	36	41	33	43	36	15	43	48	43	52	45	62	36	59	67	46	53	55	27	47	57	31	53	54	74	28	35	30	32	35	25	33	31	10	12	20	9	5	17	39	8
CH324	A4.10	003_750 ug CBD	16	21	13	9	34	21	24	32	28	27	31	47	50	51	45	41	56	34	48	58	32	20	61	71	63	77	107	88	89	95	103	77	100	81	71	99	106	108	113	100	104	101	110	99	109	102	71
CH326	B4.6	007_750ug extract	55	71	76	69	51	51	16	32	78	44	51	20	78	46	67	49	53	69	93	79	67	82	111	159	81	53	122	109	134	99	121	110	171	124	112	164	131	110	116	83	129	119	106	50	105	107	108
CH327	B4.7	007_750ug extract	67	59	38	17	54	52	47	44	33	43	43	42	44	70	51	54	56	75	78	51	56	76	66	61	46	29	50	48	70	47	64	67	52	56	51	32	76	62	73	34	52	44	30	46	50	69	47
CH328	B4.8	007_750ug extract	75	41	67	80	63	31	43	47	40	53	63	50	53	80	39	78	70	68	71	100	77	90	57	68	70	92	80	92	61	58	64	66	67	55	107	88	82	69	43	74	18	72	114	72	73	62	81
CH329	B4.9	007_750ug extract	61	56	63	48	96	66	68	46	48	66	75	76	86	79	85	90	71	80	76	94	87	85	96	100	105	104	90	113	109	98	82	102	102	55	88	114	75	121	99	114	144	76	115	71	119	80	151
CH331	C4.6	009_Group9	0	0	0	0	0	0	0	0	0	0	0	0	0	0	0	0	0	0	0	0	0	0	0	0	0	0	0	0	0	0	0	0	0	0	0	0	0	0	0	0	0	0	0	0	0	0	0
CH332	C4.7	009_Group9	0	0	0	0	0	0	0	0	0	0	0	0	0	0	0	0	0	0	0	0	0	0	0	0	0	0	0	0	0	0	0	0	0	0	0	0	0	0	0	0	0	0	0	0	0	0	0
CH333	C4.8	009_Group9	0	0	0	0	0	0	0	0	0	0	0	0	0	0	0	0	0	0	0	0	0	0	0	0	0	0	0	0	0	0	0	0	0	0	0	0	0	0	0	0	0	0	0	0	0	0	0
CH334	C4.9	009_Group9	0	0	0	0	0	0	0	0	0	0	0	0	0	0	0	0	0	0	0	0	0	0	0	0	0	0	0	0	0	0	0	0	0	0	0	0	0	0	0	0	0	0	0	0	0	0	0
CH335	C4.10	009_Group9	0	0	0	0	0	0	0	0	0	0	0	0	0	0	0	0	0	0	0	0	0	0	0	0	0	0	0	0	0	0	0	0	0	0	0	0	0	0	0	0	0	0	0	0	0	0	0
CH336	A4.11	003_750 ug CBD	68	65	109	86	147	143	114	124	47	61	80	15	11	36	17	16	42	21	104	46	8	29	59	39	66	31	25	27	31	43	58	47	80	6	31	54	46	15	0	30	67	7	34	36	7	31	148
CH337	A4.12	003_750 ug CBD	42	35	20	57	36	49	5	11	7	10	11	36	17	10	17	21	18	14	11	43	34	26	25	21	16	33	21	22	10	15	21	39	32	8	14	35	23	28	16	16	2	16	14	11	1	6	2
CH338	A4.13	003_750 ug CBD	64	51	52	30	34	46	31	11	36	48	27	19	19	21	20	39	50	34	26	27	41	45	40	49	30	38	28	30	22	26	24	15	15	6	2	21	0	8	4	1	20	23	16	60	2	2	3
CH339	A4.14	003_750 ug CBD	53	41	31	49	36	69	52	26	24	37	45	53	75	76	78	103	106	110	87	110	90	113	123	99	67	69	100	60	72	64	60	17	39	48	60	28	60	33	52	89	35	50	40	28	30	36	36
CH342	B4.10	007_750ug extract	69	74	71	78	79	62	56	49	92	105	92	102	113	53	84	99	103	127	144	102	81	119	107	58	60	82	47	74	105	83	91	104	97	72	88	52	72	76	18	63	30	44	18	78	69	24	69
CH343	B4.11	007_750ug extract	50	48	59	38	51	44	60	54	51	45	53	60	82	71	42	45	73	79	24	85	53	62	47	70	66	64	58	67	46	51	61	45	51	62	46	35	50	38	32	76	85	41	81	61	63	133	29
CH344	B4.12	007_750ug extract	54	94	95	86	100	91	51	56	40	59	64	91	74	44	37	71	35	59	63	47	41	94	34	92	73	71	43	77	78	77	53	59	55	89	41	36	29	44	53	74	92	31	19	47	95	74	44
CH345	B4.13	007_750ug extract	44	47	42	31	46	47	36	19	23	44	37	58	57	36	28	37	85	94	62	45	46	60	39	50	47	66	33	62	48	32	87	66	57	46	58	82	56	98	73	76	100	51	28	108	47	39	60
CH348	C4.11	009_Group9	0	0	0	0	0	0	0	0	0	0	0	0	0	0	0	0	0	0	0	0	0	0	0	0	0	0	0	0	0	0	0	0	0	0	0	0	0	0	0	0	0	0	0	0	0	0	0
CH349	C4.12	009_Group9	0	0	0	0	0	0	0	0	0	0	0	0	0	0	0	0	0	0	0	0	0	0	0	0	0	0	0	0	0	0	0	0	0	0	0	0	0	0	0	0	0	0	0	0	0	0	0
CH350	C4.13	009_Group9	0	0	0	0	0	0	0	0	0	0	0	0	0	0	0	0	0	0	0	0	0	0	0	0	0	0	0	0	0	0	0	0	0	0	0	0	0	0	0	0	0	0	0	0	0	0	0
CH351	C4.14	009_Group9	0	0	0	0	0	0	0	0	0	0	0	0	0	0	0	0	0	0	0	0	0	0	0	0	0	0	0	0	0	0	0	0	0	0	0	0	0	0	0	0	0	0	0	0	0	0	0
CH353	A4.15	003_750 ug CBD	61	64	110	135	71	92	43	114	127	61	147	62	130	138	102	128	94	110	96	70	71	112	89	53	110	146	166	132	124	92	141	101	157	146	102	100	120	80	149	126	193	182	191	125	161	178	129
CH354	A4.16	003_750 ug CBD	46	57	26	45	50	27	46	71	46	49	23	44	67	28	60	59	65	62	78	80	84	85	109	95	81	84	56	35	94	93	78	120	100	61	88	104	69	87	86	123	87	67	102	51	44	85	58
CH359	B4.14	007_750ug extract	89	119	67	135	112	127	112	172	166	181	148	157	122	134	111	52	101	114	44	45	57	78	63	103	60	58	99	94	95	138	95	77	87	26	17	64	58	104	27	58	61	66	90	86	107	116	124
CH360	B4.15	007_750ug extract	89	127	84	94	116	112	104	114	98	117	85	120	92	41	92	11	34	73	48	58	81	52	41	58	53	71	67	73	52	89	65	91	118	109	39	129	72	98	44	129	55	31	36	31	163	77	40
CH365	C4.15	009_Group9	0	0	0	0	0	0	0	0	0	0	0	0	0	0	0	0	0	0	0	0	0	0	0	0	0	0	0	0	0	0	0	0	0	0	0	0	0	0	0	0	0	0	0	0	0	0	0
CH366	C4.16	009_Group9	0	0	0	0	0	0	0	0	0	0	0	0	0	0	0	0	0	0	0	0	0	0	0	0	0	0	0	0	0	0	0	0	0	0	0	0	0	0	0	0	0	0	0	0	0	0	0
[truncated: 2 more columns]

## Sheet: wDAT+ CBD ex1
DATE:	2023-10-28 12:17:04								2023-10-24	feed L1s @ 4:14pm
FILE:	C:\Users\wmicrotracker\Desktop\wmicrotracker\p00020\20231025_1902								2023-10-24	start wDAT+ recording @5:04pm
SUBPROJECT:	2023 1025-27 wDAT+ CBD 300-750 ex1 bL								2023-10-25	restart wDAT+ recording @ 7:02on after washing and feeding
										= this starts at 27h
<<<<<< Group Activity: Average Activity Counts per Data Interval>>>>>>
Group/Time[m]	30	60	90	120	150	180	210	240	270	300	330	360	390	420	450	480	510	540	570	600	630	660	690	720	750	780	810	840	870	900	930	960	990	1020	1050	1080	1110	1140	1170	1200	1230	1260	1290	1320	1350	1380	1410	1440	1470
bL 0.1% Tw80	99	61	56	67	65	62	58	66	62	59	43	41	51	54	64	69	82	96	102	107	118	123	129	128	125	131	127	125	122	122	120	116	107	109	108	107	113	125	139	152	167	183	188	193	200	200	202	200	203
bL vehicle emulsion	83	66	63	56	57	50	48	54	56	50	53	62	69	78	88	100	100	105	105	111	108	109	115	117	117	113	117	109	102	106	100	97	90	95	101	117	130	147	155	172	182	184	189	194	194	197	202	196	201
300ug CBD	102	71	74	74	70	66	70	74	66	62	54	54	62	61	52	57	63	68	52	59	61	64	74	86	86	94	104	113	107	112	120	122	122	121	114	114	120	122	122	122	124	126	120	118	115	122	130	142	152
500ug CBD	92	55	55	55	50	50	56	62	67	62	56	65	57	56	54	56	67	64	62	54	57	64	63	58	66	60	64	72	73	64	72	78	81	84	94	102	114	117	124	126	130	128	128	129	128	128	132	123	126
750ug CBD	67	40	36	34	37	35	44	44	46	49	52	55	53	58	55	52	62	62	66	62	56	65	60	60	66	72	74	74	80	70	66	73	66	68	70	72	72	78	86	82	90	94	100	102	106	110	116	125	132
hours	27	27.5	28	28.5	29	29.5	30	30.5	31	31.5	32	32.5	33	33.5	34	34.5	35	35.5	36	36.5	37	37.5	38	38.5	39	39.5	40	40.5	41	41.5	42	42.5	43	43.5	44	44.5	45	45.5	46	46.5	47	47.5	48	48.5	49	49.5	50	50.5	51
<<<<<< Group Activity: Standard Error >>>>>>
Group/Time[m]	30	60	90	120	150	180	210	240	270	300	330	360	390	420	450	480	510	540	570	600	630	660	690	720	750	780	810	840	870	900	930	960	990	1020	1050	1080	1110	1140	1170	1200	1230	1260	1290	1320	1350	1380	1410	1440	1470
000_bL 0.1% Tw80	8.7	4	5.8	5.2	2.3	6.9	6.4	4	4.6	11.5	6.9	5.8	7.5	6.4	5.8	5.8	6.4	7.5	7.5	6.9	8.1	10.4	9.8	11.5	8.1	9.8	8.7	4.6	8.7	4.6	9.2	5.2	5.8	7.5	7.5	6.4	8.1	10.4	10.4	8.1	9.8	9.2	5.2	5.8	5.2	4.6	4.6	3.5	2.9
001_bL vehicle emulsion	2.9	8.1	5.8	7.5	11.5	8.7	13.3	8.1	8.7	8.1	6.4	6.9	5.2	9.2	8.1	8.1	10.4	11.5	11.5	9.8	11.5	5.2	9.8	11	8.7	6.4	7.5	10.4	13.3	13.9	12.1	8.1	12.1	9.2	14.4	16.2	15.6	13.9	16.7	16.7	13.3	11	9.8	9.8	9.2	7.5	6.9	5.2	6.4
002_300ug CBD	0.7	2.1	7.8	0.7	8.5	7.8	1.4	9.2	7.8	11.3	4.2	7.8	0.7	7.1	2.8	2.1	2.8	0	0.7	4.2	2.1	0.7	4.2	0.7	2.8	2.8	5.7	2.1	4.9	4.9	3.5	6.4	4.2	4.9	6.4	4.2	9.2	4.2	5.7	11.3	9.2	7.8	7.8	1.4	0.7	1.4	0.7	4.2	8.5
003_500ug CBD	5.7	2.8	0	0.7	4.2	4.2	9.2	9.2	5.7	7.8	7.8	4.9	9.2	7.8	2.8	5.7	7.8	0	5.7	6.4	4.2	0.7	2.8	8.5	5.7	5.7	10.6	12.7	2.1	7.8	9.2	0.7	2.1	3.5	5.7	0.7	1.4	4.2	3.5	4.2	6.4	5.7	8.5	9.9	14.8	9.2	7.1	14.8	8.5
004_750ug CBD	2.8	3.5	5.7	2.8	7.1	4.2	4.2	10.6	6.4	9.2	12.7	9.2	9.2	5.7	4.9	9.2	12.7	7.8	4.9	0.7	9.2	7.8	14.1	14.8	4.2	6.4	13.4	7.8	4.2	1.4	11.3	12.7	14.8	5.7	11.3	7.8	11.3	6.4	3.5	2.8	4.2	6.4	4.9	2.8	4.2	3.5	2.1	0.7	1.4
<<<<<< Group Activity: Number of wells/group >>>>>>
Group/Time[m]	30	60	90	120	150	180	210	240	270	300	330	360	390	420	450	480	510	540	570	600	630	660	690	720	750	780	810	840	870	900	930	960	990	1020	1050	1080	1110	1140	1170	1200	1230	1260	1290	1320	1350	1380	1410	1440	1470
000_bL 0.1% Tw80	3	3	3	3	3	3	3	3	3	3	3	3	3	3	3	3	3	3	3	3	3	3	3	3	3	3	3	3	3	3	3	3	3	3	3	3	3	3	3	3	3	3	3	3	3	3	3	3	3
001_bL vehicle emulsion	3	3	3	3	3	3	3	3	3	3	3	3	3	3	3	3	3	3	3	3	3	3	3	3	3	3	3	3	3	3	3	3	3	3	3	3	3	3	3	3	3	3	3	3	3	3	3	3	3
002_300ug CBD	2	2	2	2	2	2	2	2	2	2	2	2	2	2	2	2	2	2	2	2	2	2	2	2	2	2	2	2	2	2	2	2	2	2	2	2	2	2	2	2	2	2	2	2	2	2	2	2	2
003_500ug CBD	2	2	2	2	2	2	2	2	2	2	2	2	2	2	2	2	2	2	2	2	2	2	2	2	2	2	2	2	2	2	2	2	2	2	2	2	2	2	2	2	2	2	2	2	2	2	2	2	2
004_750ug CBD	2	2	2	2	2	2	2	2	2	2	2	2	2	2	2	2	2	2	2	2	2	2	2	2	2	2	2	2	2	2	2	2	2	2	2	2	2	2	2	2	2	2	2	2	2	2	2	2	2
<<<<<< Number of Samples per Acquisition Interval [1unit=500values] >>>>>>
Time[m]	30	60	90	120	150	180	210	240	270	300	330	360	390	420	450	480	510	540	570	600	630	660	690	720	750	780	810	840	870	900	930	960	990	1020	1050	1080	1110	1140	1170	1200	1230	1260	1290	1320	1350	1380	1410	1440	1470
#Samples	30	30	30	30	30	30	30	30	30	30	30	30	30	30	30	30	30	30	30	30	30	30	30	30	30	30	30	30	30	30	30	30	30	30	30	30	30	30	30	30	30	30	30	30	30	30	30	30	30
<<<<<< Average Temperature [°C] >>>>>>
Time[m]	30	60	90	120	150	180	210	240	270	300	330	360	390	420	450	480	510	540	570	600	630	660	690	720	750	780	810	840	870	900	930	960	990	1020	1050	1080	1110	1140	1170	1200	1230	1260	1290	1320	1350	1380	1410	1440	1470
Temp[°C]	21.5	21.7	21.7	21.7	21.7	21.7	21.7	21.7	21.7	21.7	21.7	21.7	21.7	21.7	21.7	21.7	21.7	21.7	21.7	21.7	21.7	21.7	21.7	21.7	21.7	21.7	21.7	21.7	21.7	21.7	21.7	21.7	21.7	21.7	21.7	21.7	21.7	21.7	21.7	21.7	21.7	21.7	21.7	21.7	21.7	21.7	21.7	21.7	21.7
<<<<<< Well Activity >>>>>>
Well	Group/Time[m]	30	60	90	120	150	180	210	240	270	300	330	360	390	420	450	480	510	540	570	600	630	660	690	720	750	780	810	840	870	900	930	960	990	1020	1050	1080	1110	1140	1170	1200	1230	1260	1290	1320	1350	1380	1410	1440
A1	000_bL 0.1% Tw80	82	54	66	77	65	73	66	61	57	52	48	50	65	63	71	77	93	104	108	115	126	134	142	137	130	134	130	127	124	118	108	107	97	97	99	96	107	120	136	155	168	182	190	191	194	195	201	197
B1	004_750ug CBD	70	43	42	37	44	39	48	54	52	58	64	64	62	63	60	62	74	70	71	61	65	73	74	75	70	78	88	82	84	72	77	86	81	74	81	79	84	84	89	84	94	100	105	105	110	114	114	126
C1	003_500ug CBD	87	58	55	56	54	54	65	71	73	70	64	70	66	64	57	62	75	64	68	61	61	63	66	66	72	66	74	84	75	72	81	79	83	88	100	101	116	121	127	130	136	134	137	139	143	138	139	138
A2	001_bL vehicle emulsion	84	68	74	69	79	67	72	64	64	61	61	66	77	85	99	109	112	119	118	123	117	111	125	127	117	110	117	110	95	102	100	101	96	93	111	125	146	159	170	187	191	190	199	207	201	202	211	202
B2	000_bL 0.1% Tw80	108	68	56	61	62	62	63	74	71	82	52	44	50	56	68	73	80	102	112	113	127	133	135	142	135	146	141	131	136	132	138	124	116	122	122	118	129	145	158	164	183	199	196	203	211	209	211	207
C2	004_750ug CBD	64	36	31	31	30	31	39	33	39	40	39	46	44	52	50	43	49	54	61	62	46	57	46	46	62	65	61	67	76	69	55	60	51	62	58	64	61	71	82	79	86	87	95	100	101	107	118	124
A3	002_300ug CBD	103	73	81	73	79	74	68	84	74	74	59	61	63	54	49	55	60	68	52	63	63	64	70	85	88	96	110	111	102	107	117	115	118	116	108	110	111	118	116	110	115	118	112	117	116	123	130	147
B3	001_bL vehicle emulsion	78	51	56	55	53	47	45	61	65	55	57	72	72	89	93	107	109	114	116	119	121	117	124	130	132	125	130	127	128	131	120	109	108	112	120	140	145	162	174	191	198	199	199	200	205	207	207	200
C3	000_bL 0.1% Tw80	107	60	46	62	69	50	46	63	58	43	29	30	39	42	52	58	72	81	87	93	102	103	109	105	109	112	111	116	107	117	113	117	107	107	102	107	103	109	122	137	150	168	178	184	196	195	195	196
A4	003_500ug CBD	98	52	55	54	46	45	47	53	61	54	49	60	48	48	52	50	59	64	56	48	53	64	60	49	61	54	53	59	71	56	63	77	79	81	88	102	113	113	120	121	123	122	120	119	114	119	125	108
B4	002_300ug CBD	102	69	66	74	62	59	71	65	59	51	50	46	61	68	54	59	66	68	51	55	59	65	78	86	83	91	98	115	112	117	124	128	127	126	121	119	129	126	128	133	133	134	127	120	114	120	129	138
C4	001_bL vehicle emulsion	88	79	58	44	40	37	27	38	38	34	41	48	59	60	72	84	79	83	82	91	85	99	95	95	102	104	104	91	83	84	79	81	67	81	73	85	98	119	122	139	156	162	169	175	175	183	188	186
<<<<<< Channel Activity >>>>>>
Channel	Well	Group/Time[m]	30	60	90	120	150	180	210	240	270	300	330	360	390	420	450	480	510	540	570	600	630	660	690	720	750	780	810	840	870	900	930	960	990	1020	1050	1080	1110	1140	1170	1200	1230	1260	1290	1320	1350	1380	1410
CH17	A1.0	000_bL 0.1% Tw80	64	39	29	42	28	12	35	16	6	18	9	4	9	33	27	26	30	39	70	83	163	157	161	183	149	174	180	182	220	200	189	229	203	217	209	222	183	237	229	209	209	205	195	191	209	196	195
CH18	A1.1	000_bL 0.1% Tw80	41	20	37	16	21	58	14	24	6	8	18	1	7	18	8	13	32	41	78	92	103	111	160	164	183	191	175	155	208	195	225	216	187	156	153	130	162	181	150	203	204	206	212	226	234	204	214
CH23	B1.0	004_750ug CBD	57	31	22	7	24	55	37	26	24	21	33	18	9	18	19	8	12	53	45	23	4	16	9	18	24	15	14	9	35	10	17	61	25	14	38	46	69	46	107	58	81	52	59	59	92	140	113
CH24	B1.1	004_750ug CBD	44	20	26	27	11	11	4	22	23	21	23	20	16	17	13	8	12	35	36	13	50	9	28	90	49	47	118	65	21	35	74	33	47	10	28	12	52	42	40	40	21	52	78	59	119	112	178
CH29	C1.0	003_500ug CBD	19	35	13	35	49	24	15	49	84	60	57	16	25	10	0	5	13	9	11	4	9	7	17	0	6	11	43	35	18	24	71	16	19	37	29	26	26	42	70	99	108	88	119	128	130	163	145
CH30	C1.1	003_500ug CBD	40	32	15	29	11	18	18	19	17	23	10	13	7	27	6	3	2	7	5	3	3	8	5	0	3	0	7	4	5	37	31	14	21	31	37	43	65	51	102	88	98	145	118	167	147	155	162
CH32	A1.2	000_bL 0.1% Tw80	61	155	30	67	40	69	39	30	14	20	15	19	21	24	51	58	90	140	139	136	161	187	177	133	140	144	142	128	138	102	87	125	90	74	123	117	92	155	126	179	174	177	189	190	202	186	191
CH33	A1.3	000_bL 0.1% Tw80	44	9	6	8	31	16	7	5	7	0	6	4	4	9	19	24	48	53	80	84	101	83	116	110	116	135	70	51	71	69	51	27	39	25	43	39	33	62	100	96	146	164	170	176	181	196	202
CH34	A1.4	000_bL 0.1% Tw80	61	38	33	25	19	30	14	5	9	2	3	3	3	5	16	34	50	70	73	69	81	116	114	118	83	104	135	134	84	59	72	30	25	15	12	19	50	49	153	99	148	202	214	202	171	232	210
CH35	A1.5	000_bL 0.1% Tw80	97	22	12	23	9	20	13	14	16	8	20	28	9	19	28	37	58	70	87	123	142	159	177	160	142	152	195	179	154	158	122	134	65	42	87	56	106	103	157	165	195	232	266	245	248	256	231
CH38	B1.2	004_750ug CBD	27	34	47	29	26	17	8	52	92	60	40	39	49	15	13	17	26	3	26	37	20	17	2	18	11	115	17	9	53	28	23	31	6	15	19	18	38	44	27	21	37	53	61	46	88	61	46
CH39	B1.3	004_750ug CBD	41	6	1	8	8	7	16	11	27	12	18	8	35	9	38	44	10	17	34	30	34	16	32	28	36	36	28	25	16	22	15	15	11	16	27	18	19	18	21	15	28	42	67	57	24	51	60
CH40	B1.4	004_750ug CBD	17	13	11	8	11	12	23	15	13	19	31	24	21	60	59	49	20	22	16	38	36	80	36	32	22	46	73	28	89	79	21	31	32	43	50	57	29	26	38	30	73	70	59	68	67	70	68
CH41	B1.5	004_750ug CBD	29	6	4	14	29	19	13	37	48	33	38	74	40	42	21	31	33	48	65	121	42	71	22	73	30	26	47	20	54	17	48	69	38	25	17	38	76	40	66	62	79	86	133	165	143	150	175
CH44	C1.2	003_500ug CBD	25	20	22	29	23	7	5	4	9	16	28	38	26	37	6	9	29	29	16	24	16	35	47	25	22	13	21	17	40	33	29	12	9	25	25	32	34	27	51	34	26	32	26	29	44	50	68
CH45	C1.3	003_500ug CBD	19	6	6	13	3	15	30	32	43	22	36	22	30	20	16	12	22	10	26	11	4	19	22	7	5	7	8	7	15	18	9	19	47	46	42	56	39	30	75	93	62	74	54	109	88	142	83
CH46	C1.4	003_500ug CBD	57	48	44	38	36	16	25	25	52	32	8	29	11	8	9	11	5	5	13	2	7	0	10	8	10	2	10	8	20	16	44	25	25	38	62	53	81	80	76	101	138	133	118	111	98	90	112
CH47	C1.5	003_500ug CBD	34	20	27	18	47	18	26	42	39	29	30	60	28	44	19	18	68	7	23	6	7	22	4	10	39	13	19	30	41	20	24	24	70	59	79	73	123	176	170	126	160	130	143	158	181	168	160
CH48	A1.6	000_bL 0.1% Tw80	58	33	40	92	44	46	31	120	101	172	55	8	83	95	38	57	134	159	139	109	116	100	125	114	154	160	131	140	171	132	121	127	97	126	99	95	130	109	122	163	173	163	186	176	170	186	187
CH49	A1.7	000_bL 0.1% Tw80	41	8	9	15	13	14	10	7	7	7	5	7	38	10	22	24	50	40	41	40	58	64	53	52	53	29	44	77	78	62	24	22	6	8	5	13	21	41	48	69	124	126	140	182	198	180	188
CH50	A1.8	000_bL 0.1% Tw80	100	19	13	18	20	28	41	29	10	7	7	2	17	6	31	34	47	43	52	85	89	93	112	101	96	91	57	37	51	21	29	25	30	19	23	42	52	60	104	166	168	172	194	197	199	204	233
CH51	A1.9	000_bL 0.1% Tw80	130	83	179	153	114	84	126	76	42	17	8	9	34	52	73	27	69	84	65	108	109	134	140	152	129	115	114	126	78	83	71	52	25	87	29	66	87	89	119	172	180	234	236	219	247	232	249
CH52	A1.10	000_bL 0.1% Tw80	187	216	197	200	169	205	210	224	210	240	221	232	224	214	201	221	192	218	195	177	178	194	182	166	153	164	183	185	167	198	176	177	181	182	175	192	174	181	177	168	163	171	184	153	167	150	172
CH54	B1.6	004_750ug CBD	112	66	65	7	2	8	6	14	27	18	4	18	13	21	13	22	37	15	56	10	27	64	133	26	27	22	32	26	45	19	32	21	43	36	53	60	69	95	49	22	58	52	102	41	77	38	42
CH55	B1.7	004_750ug CBD	37	29	11	7	25	16	12	27	25	20	13	22	32	37	24	20	70	32	36	22	42	55	26	12	38	17	27	27	15	26	18	26	42	80	31	75	24	15	27	41	33	51	28	41	33	75	54
CH56	B1.8	004_750ug CBD	43	10	16	9	8	17	30	29	50	81	47	37	45	49	30	34	20	40	28	14	36	52	45	36	32	40	27	85	38	24	23	65	65	22	49	25	28	56	44	53	72	82	60	85	92	69	66
CH57	B1.9	004_750ug CBD	87	28	36	36	31	41	50	46	49	37	108	82	97	67	82	46	145	89	124	69	121	57	94	95	77	37	65	124	80	65	65	103	127	98	46	56	111	136	133	153	141	158	134	184	171	191	171
CH59	C1.6	003_500ug CBD	87	58	12	29	49	52	59	102	61	102	46	59	94	83	73	114	56	48	83	70	45	75	98	147	186	117	152	192	119	126	143	101	148	154	191	149	151	131	141	157	152	187	186	189	198	171	185
CH60	C1.7	003_500ug CBD	72	41	19	25	16	20	31	19	38	26	31	28	40	15	40	11	27	17	24	83	100	63	64	72	33	66	44	101	97	104	93	90	133	123	105	106	125	152	111	96	186	120	166	92	94	122	95
CH61	C1.8	003_500ug CBD	59	17	27	24	13	13	36	35	25	42	26	35	24	6	19	6	14	11	8	9	18	11	16	13	7	14	19	21	15	35	27	27	56	39	37	58	64	82	99	102	87	73	55	54	71	45	45
CH62	C1.9	003_500ug CBD	126	42	7	16	10	15	47	30	15	33	71	20	24	38	27	13	8	2	14	12	5	3	8	13	8	8	14	15	18	15	13	41	35	40	95	88	109	126	139	163	168	130	134	138	126	119	77
CH63	C1.10	003_500ug CBD	74	27	63	71	53	81	128	129	85	89	93	71	71	27	39	66	112	63	59	34	54	58	38	25	35	63	109	111	68	25	39	116	71	67	95	123	176	182	184	160	193	150	168	202	181	165	188
CH64	A1.11	000_bL 0.1% Tw80	68	85	141	180	204	177	175	116	125	15	22	80	87	123	160	144	156	172	158	150	190	162	194	193	186	209	189	187	187	165	166	164	172	154	193	162	209	195	184	195	192	179	150	173	156	165	135
CH65	A1.12	000_bL 0.1% Tw80	54	24	85	23	58	116	36	20	19	14	6	9	34	15	23	87	75	82	94	94	103	120	118	95	94	75	70	45	30	77	47	80	93	44	61	25	23	40	91	113	141	141	167	170	173	179	190
CH66	A1.13	000_bL 0.1% Tw80	144	54	59	128	60	62	94	37	48	19	4	3	7	23	41	46	67	39	62	85	72	108	105	128	91	66	55	45	36	29	39	22	22	42	41	83	40	55	67	120	112	159	186	193	205	211	252
CH67	A1.14	000_bL 0.1% Tw80	68	60	213	244	221	219	180	164	125	95	138	80	94	50	85	83	86	130	117	145	133	164	151	139	145	126	139	126	90	106	93	77	70	99	69	53	97	106	127	164	178	219	212	220	228	230	234
CH70	B1.10	004_750ug CBD	98	76	42	31	96	55	123	165	53	154	140	196	153	87	93	86	176	184	127	63	83	82	66	128	130	154	138	213	227	160	155	199	172	175	184	193	207	222	222	210	171	182	178	166	206	181	168
CH71	B1.11	004_750ug CBD	86	26	72	25	11	5	11	21	8	79	29	27	43	39	24	19	73	43	55	46	44	110	66	48	23	84	152	80	132	119	95	98	100	73	128	114	82	35	77	81	130	129	72	97	73	91	107
CH72	B1.12	004_750ug CBD	124	133	43	16	10	46	32	19	40	44	60	59	60	85	75	145	95	108	97	118	104	97	124	145	175	168	156	134	127	105	95	95	121	104	123	90	68	103	94	52	110	103	118	109	85	122	91
CH73	B1.13	004_750ug CBD	79	38	78	135	151	127	147	144	140	121	201	159	187	171	170	151	137	149	115	102	117	125	151	132	128	123	138	109	118	86	176	179	89	95	113	115	116	107	127	119	147	139	159	162	156	133	138
CH76	C1.11	003_500ug CBD	124	81	61	82	52	74	72	42	73	74	34	85	99	47	106	98	197	128	174	146	118	109	119	157	169	167	127	200	173	183	201	198	198	165	176	183	170	166	157	176	177	177	190	168	184	169	190
CH77	C1.12	003_500ug CBD	100	16	30	12	13	18	32	45	38	37	16	42	43	56	41	35	73	40	57	20	45	87	86	93	136	51	82	49	78	72	80	82	62	91	119	124	135	154	143	145	131	150	148	177	166	122	158
CH78	C1.13	003_500ug CBD	130	17	26	19	59	65	54	68	58	47	53	80	73	123	85	120	69	124	94	53	45	86	84	77	100	72	59	126	26	49	46	71	63	85	119	153	158	188	161	175	162	184	173	146	185	143	148
CH79	C1.14	003_500ug CBD	164	180	216	209	198	194	199	188	207	182	158	200	143	176	98	137	177	146	114	148	169	117	152	133	126	155	160	117	160	102	175	149	159	155	159	136	177	160	168	183	155	170	189	180	171	167	186
CH81	A1.15	000_bL 0.1% Tw80	58	18	21	23	19	46	33	23	39	39	67	146	205	161	189	173	168	161	175	163	155	167	162	154	139	155	147	182	146	158	155	139	153	169	176	157	154	177	168	150	154	170	143	170	136	144	148
CH82	A1.16	000_bL 0.1% Tw80	117	41	21	46	42	33	64	131	179	205	204	223	225	219	192	225	229	219	203	204	189	164	170	173	158	186	188	186	192	191	173	169	196	197	183	169	206	195	192	206	198	178	191	172	171	163	187
CH87	B1.14	004_750ug CBD	81	58	51	89	125	118	135	95	58	73	107	100	72	123	83	148	144	104	77	80	109	113	161	136	167	139	187	160	147	179	195	188	180	181	212	183	170	167	163	179	140	167	171	156	180	179	178
CH88	B1.15	004_750ug CBD	151	108	141	138	136	77	113	144	159	140	134	137	119	168	209	159	173	175	196	193	174	197	191	187	158	185	184	199	141	183	185	169	192	204	182	170	191	197	194	207	188	182	194	179	158	162	173
CH93	C1.15	003_500ug CBD	169	220	213	174	131	124	165	188	180	180	192	213	199	172	200	196	212	245	230	228	233	204	187	222	232	231	233	231	233	220	194	203	155	180	171	172	156	160	170	160	168	164	182	161	189	198	209
CH94	C1.16	003_500ug CBD	180	127	131	135	154	160	165	187	223	196	192	187	190	205	182	195	186	192	213	186	166	163	158	113	111	136	144	156	156	142	159	163	148	159	164	150	190	147	146	150	143	167	168	156	179	160	157
CH113	A2.0	001_bL vehicle emulsion	109	29	54	41	32	20	68	16	2	24	6	12	37	28	47	61	118	80	97	145	83	76	126	78	134	122	113	122	164	158	155	152	154	118	118	164	186	208	197	202	206	218	222	246	204	235	231
CH114	A2.1	001_bL vehicle emulsion	61	37	73	39	49	19	6	16	17	9	10	13	47	28	63	85	72	150	110	118	130	110	121	126	107	136	173	140	93	101	28	69	75	82	117	107	146	170	181	188	207	189	203	230	236	213	231
CH115	A2.2	001_bL vehicle emulsion	57	71	92	105	174	160	125	126	151	80	86	52	57	76	79	125	81	102	120	101	92	73	129	121	97	146	141	108	117	114	110	76	109	106	130	180	164	173	170	208	191	207	231	224	240	205	232
CH118	B2.0	000_bL 0.1% Tw80	76	61	43	53	27	16	27	32	61	69	25	1	32	24	46	52	79	101	99	87	116	127	107	141	134	157	97	117	119	167	181	128	116	89	74	116	139	161	183	152	151	170	170	165	168	156	176
CH119	B2.1	000_bL 0.1% Tw80	56	34	33	35	43	36	43	18	7	22	8	2	53	29	22	29	63	70	95	80	87	111	138	129	121	117	96	108	81	96	101	51	73	92	145	114	135	188	197	191	239	244	227	232	232	223	205
CH120	B2.2	000_bL 0.1% Tw80	108	13	37	41	40	12	73	91	188	122	79	51	72	69	115	65	53	83	68	72	86	93	131	162	141	140	146	131	97	62	110	193	119	138	113	139	158	124	141	152	196	203	222	238	241	239	227
CH121	B2.3	000_bL 0.1% Tw80	80	47	34	25	60	47	45	29	39	101	8	8	32	38	84	67	75	116	119	120	144	156	148	159	135	147	160	155	139	132	164	155	151	185	158	110	152	161	160	158	195	177	155	170	175	169	174
CH124	C2.0	004_750ug CBD	29	59	32	23	9	11	18	34	55	56	7	24	70	47	29	34	31	30	28	20	57	26	31	27	41	46	38	31	67	32	48	18	7	44	53	85	75	132	116	119	124	93	96	132	139	133	137
CH125	C2.1	004_750ug CBD	38	21	17	21	12	11	23	23	15	25	36	32	55	10	10	40	32	27	12	12	14	28	7	17	14	34	37	48	33	63	27	34	20	15	69	34	39	38	59	39	50	36	60	89	87	66	89
CH126	C2.2	004_750ug CBD	53	26	43	25	16	9	13	21	31	7	29	23	17	18	47	12	7	7	30	41	11	28	23	14	37	44	61	17	24	8	10	15	10	13	30	11	26	26	75	57	86	85	128	72	75	113	120
CH128	A2.3	001_bL vehicle emulsion	65	18	36	22	51	58	28	13	6	10	25	37	32	44	58	51	86	52	35	76	75	78	164	75	41	71	122	87	45	27	46	30	38	72	116	108	129	145	150	156	197	188	180	228	221	217	225
CH129	A2.4	001_bL vehicle emulsion	43	14	17	22	4	19	13	13	14	6	16	18	17	21	53	61	89	67	86	88	77	80	123	154	116	64	27	38	27	15	3	9	11	25	57	88	122	125	137	175	186	201	206	208	205	212	227
CH130	A2.5	001_bL vehicle emulsion	41	22	38	23	8	4	12	8	6	14	7	23	28	53	51	98	73	62	82	66	65	54	80	42	53	32	18	30	19	8	34	17	17	43	40	87	110	137	189	193	206	205	233	234	233	219	221
CH131	A2.6	001_bL vehicle emulsion	43	95	89	55	81	53	47	71	41	45	53	75	58	77	100	104	92	116	125	149	163	122	92	133	160	148	118	101	58	77	38	82	51	47	58	109	118	174	199	224	217	231	256	229	219	240	224
CH132	A2.7	001_bL vehicle emulsion	199	210	195	200	203	207	204	230	221	178	200	211	199	199	185	192	190	194	149	152	148	151	147	153	148	166	169	128	106	152	168	134	169	147	144	157	164	157	150	167	159	154	140	150	172	162	169
CH134	B2.4	000_bL 0.1% Tw80	41	72	61	16	21	10	37	84	13	6	12	8	14	17	51	48	65	67	78	78	113	107	138	108	112	137	147	80	124	92	112	102	70	110	153	116	50	76	96	113	120	143	145	168	165	171	183
CH135	B2.5	000_bL 0.1% Tw80	62	36	17	21	8	14	16	9	9	6	6	9	23	7	19	24	28	64	62	90	86	112	100	81	178	213	95	103	111	105	136	160	120	185	171	171	168	194	219	213	201	190	179	182	202	208	226
CH136	B2.6	000_bL 0.1% Tw80	117	28	23	22	35	34	24	1	54	46	18	16	9	20	17	27	50	38	74	66	96	125	110	141	128	145	175	153	173	164	131	117	60	101	106	97	119	158	179	144	217	236	270	230	257	237	260
CH137	B2.7	000_bL 0.1% Tw80	194	60	65	77	91	62	83	65	55	61	33	63	30	19	22	51	65	81	105	125	142	120	137	122	99	93	157	114	148	154	145	168	124	122	107	109	153	136	151	177	218	234	243	259	265	249	267
CH139	C2.3	004_750ug CBD	14	8	1	1	6	4	2	8	6	16	1	14	7	21	17	16	17	11	27	14	9	11	13	18	23	13	18	28	15	12	15	12	5	26	27	21	18	13	22	29	29	32	55	48	41	31	62
CH140	C2.4	004_750ug CBD	53	19	4	7	17	1	3	20	13	11	7	33	23	8	3	15	19	37	30	67	13	21	22	49	36	32	17	37	13	36	27	20	13	31	18	23	43	107	38	59	59	75	95	81	126	161	93
CH141	C2.5	004_750ug CBD	33	12	7	8	0	11	3	8	31	6	21	15	10	22	35	5	6	6	8	22	7	13	29	12	25	50	34	43	20	30	15	40	12	26	28	20	28	35	44	18	36	62	40	53	59	90	140
CH142	C2.6	004_750ug CBD	76	39	6	13	28	47	87	23	37	20	23	18	38	24	28	31	21	21	22	31	14	31	17	28	39	35	32	67	31	65	24	81	69	56	39	53	42	24	49	45	67	45	54	46	79	118	111
CH143	C2.7	004_750ug CBD	29	20	18	19	28	28	36	37	67	93	53	45	66	63	50	48	67	44	36	25	23	30	34	22	18	34	42	34	45	72	62	47	28	76	23	73	87	74	118	72	113	136	148	118	110	120	110
CH144	A2.8	001_bL vehicle emulsion	35	33	40	49	71	21	17	24	34	92	48	70	101	72	120	50	86	119	72	69	67	98	128	140	116	70	95	108	97	129	161	128	121	140	141	113	149	133	161	173	156	165	167	174	154	191	208
CH145	A2.9	001_bL vehicle emulsion	46	34	23	44	27	19	8	3	7	16	11	17	28	35	52	60	67	59	68	82	59	62	88	113	70	40	48	41	44	32	67	99	89	44	79	63	145	113	158	147	147	157	161	180	167	189	221
CH146	A2.10	001_bL vehicle emulsion	43	31	22	29	32	15	21	17	20	7	19	19	32	54	104	97	94	111	129	126	107	64	78	93	81	60	52	43	23	22	15	110	74	31	40	67	123	111	142	194	195	184	196	203	188	194	196
CH147	A2.11	001_bL vehicle emulsion	135	98	114	118	140	96	122	86	151	90	53	77	85	120	108	130	150	142	142	125	165	156	119	141	122	144	139	132	74	110	102	47	22	62	60	84	122	167	199	224	206	228	216	254	237	226	226
CH148	A2.12	001_bL vehicle emulsion	228	222	220	202	211	196	205	202	198	197	208	193	218	225	217	223	210	213	219	209	208	222	171	163	178	140	172	189	197	201	195	226	217	212	212	210	216	210	213	228	211	218	213	219	210	211	222
CH150	B2.8	000_bL 0.1% Tw80	53	27	31	23	16	30	12	43	9	8	9	12	3	89	35	54	79	108	126	103	134	120	108	152	153	184	81	135	142	182	153	164	203	139	86	86	48	100	102	99	122	137	125	178	177	166	160
CH151	B2.9	000_bL 0.1% Tw80	107	13	12	26	8	7	25	15	34	17	9	7	9	15	12	39	33	84	66	94	141	109	96	91	107	143	151	90	90	73	120	84	84	80	67	39	39	55	100	111	128	191	202	211	192	220	218
CH152	B2.10	000_bL 0.1% Tw80	170	37	36	33	41	41	43	16	42	85	14	22	24	27	27	53	36	73	98	92	133	141	131	151	120	175	101	114	139	127	90	64	115	64	56	100	137	145	138	168	192	224	227	232	250	251	254
CH153	B2.11	000_bL 0.1% Tw80	246	241	247	243	250	210	155	155	104	89	78	56	49	75	58	57	75	91	116	93	87	120	129	128	142	100	128	117	125	96	141	121	79	56	119	107	99	129	138	194	191	233	243	231	249	249	237
CH155	C2.8	004_750ug CBD	55	74	101	82	52	31	29	23	9	21	21	20	24	28	39	21	76	68	84	65	52	33	61	49	73	60	49	69	67	55	49	46	56	92	93	89	97	118	131	147	146	139	144	149	139	116	164
CH156	C2.9	004_750ug CBD	85	23	18	8	3	7	4	17	2	33	36	24	12	47	22	15	23	45	22	45	45	111	39	33	81	76	40	81	146	76	28	68	43	37	28	70	60	55	79	57	84	163	101	146	159	124	136
CH157	C2.10	004_750ug CBD	60	11	7	8	2	8	28	4	18	15	13	17	15	41	15	10	14	17	35	60	15	18	31	16	25	22	39	19	36	54	45	25	28	26	45	33	29	80	96	16	25	32	56	67	74	52	72
CH158	C2.11	004_750ug CBD	62	10	9	3	16	17	4	19	13	20	50	28	16	31	40	9	7	85	36	38	18	17	14	43	63	50	56	60	56	74	77	77	50	46	24	36	20	25	87	121	55	59	91	74	70	82	111
CH159	C2.12	004_750ug CBD	81	66	65	62	45	111	194	188	166	99	98	135	104	125	132	105	83	78	152	117	112	103	79	39	52	95	110	56	145	38	23	72	31	42	42	37	57	37	35	36	59	74	78	129	105	131	191
CH160	A2.13	001_bL vehicle emulsion	98	53	28	21	12	9	26	48	22	36	80	73	86	90	85	132	128	131	129	134	133	148	165	169	184	147	172	173	175	181	186	189	191	180	171	172	189	196	180	191	207	188	199	174	166	181	193
CH161	A2.14	001_bL vehicle emulsion	50	28	46	79	57	86	121	25	5	6	13	34	28	56	69	77	66	86	113	136	105	52	69	104	101	90	154	186	124	116	92	77	72	77	148	134	119	155	164	147	168	136	178	188	179	169	157
CH162	A2.15	001_bL vehicle emulsion	93	56	85	29	55	32	62	58	67	47	24	18	51	79	97	122	106	127	128	137	149	166	157	140	122	134	129	96	121	135	137	89	54	51	71	95	128	163	146	191	200	184	203	210	210	211	211
CH163	A2.16	001_bL vehicle emulsion	90	97	82	93	133	123	141	130	132	172	179	184	208	182	201	188	190	209	207	182	163	171	176	210	159	160	144	151	134	149	164	177	175	150	189	179	159	174	154	165	180	172	180	175	176	165	197
CH166	B2.12	000_bL 0.1% Tw80	87	95	104	125	57	63	74	180	93	123	103	66	86	92	167	166	178	165	176	158	174	168	163	183	148	197	203	192	188	186	198	162	186	169	185	181	186	181	183	205	190	181	164	170	179	180	193
CH167	B2.13	000_bL 0.1% Tw80	80	149	43	50	50	111	74	56	53	149	71	20	16	19	36	65	71	123	156	179	184	193	166	180	151	118	162	126	143	135	92	93	93	138	124	106	139	162	153	150	166	184	176	178	207	194	207
CH168	B2.14	000_bL 0.1% Tw80	112	58	35	53	92	81	74	170	175	202	125	156	112	129	137	134	118	143	157	158	138	162	191	152	139	119	185	163	149	171	171	72	109	170	136	106	168	165	196	210	201	235	210	228	237	246	217
CH169	B2.15	000_bL 0.1% Tw80	146	110	78	137	161	223	206	213	204	212	229	214	232	220	242	237	213	218	201	216	167	168	161	200	150	153	179	196	208	171	161	147	146	121	147	199	177	186	191	183	198	200	183	169	182	179	176
CH172	C2.13	004_750ug CBD	75	47	82	53	109	101	37	45	52	53	71	152	34	91	47	67	125	73	140	109	69	113	65	122	163	188	160	181	191	189	179	174	204	210	205	207	174	210	208	210	192	179	205	201	190	163	177
CH173	C2.14	004_750ug CBD	178	53	14	4	18	13	4	9	14	22	7	0	2	13	34	11	42	56	42	32	64	47	52	87	122	111	102	160	166	167	100	133	101	148	121	168	108	119	127	98	103	114	84	86	68	110	82
CH174	C2.15	004_750ug CBD	99	108	48	30	33	31	53	14	39	69	70	59	108	132	129	120	74	117	124	171	108	176	157	102	146	126	96	83	117	84	122	56	104	109	28	31	33	24	44	129	135	59	68	105	87	103	93
CH175	C2.16	004_750ug CBD	65	19	59	155	117	90	126	76	92	109	124	143	144	169	166	174	182	198	205	193	158	156	116	103	104	93	99	124	127	122	88	102	86	56	112	98	96	87	66	90	97	101	105	100	107	110	115
CH208	A3.0	002_300ug CBD	167	107	91	23	16	16	13	30	27	10	11	102	65	13	11	63	76	151	90	40	64	42	88	163	135	79	112	157	86	100	161	135	157	147	155	223	208	201	206	222	250	232	264	261	232	244	263
CH209	A3.1	002_300ug CBD	89	62	116	95	148	107	59	40	47	17	30	7	19	6	18	4	10	10	5	47	29	12	15	30	35	58	138	110	86	55	78	88	156	87	141	96	142	153	90	101	105	135	75	109	92	140	158
CH210	A3.2	002_300ug CBD	83	50	54	49	23	23	18	45	39	22	17	14	17	11	4	10	24	3	18	19	35	44	59	55	38	62	95	81	63	76	87	124	74	76	73	66	94	99	134	58	78	79	43	64	74	91	96
CH211	A3.3	002_300ug CBD	93	95	79	58	79	109	70	112	84	35	64	55	63	37	24	55	64	70	97	127	97	91	116	115	138	106	120	99	111	120	155	117	157	102	139	136	131	154	138	124	111	114	80	123	114	151	125
CH214	B3.0	001_bL vehicle emulsion	58	44	58	35	51	33	27	39	131	28	29	37	47	69	71	98	129	114	105	90	130	110	135	154	183	188	170	159	169	103	119	147	148	158	168	119	159	169	155	173	172	170	167	165	165	161	170
CH215	B3.1	001_bL vehicle emulsion	31	17	37	13	10	6	9	34	60	4	16	54	24	23	41	69	81	96	64	61	56	64	56	76	55	67	165	152	128	74	78	101	146	146	140	185	161	215	228	248	258	246	228	249	235	289	247
CH216	B3.2	001_bL vehicle emulsion	85	41	29	34	23	17	18	20	26	10	22	32	26	44	47	75	82	71	92	93	84	77	137	124	96	107	96	85	123	133	101	94	82	100	76	96	155	148	176	201	238	200	204	210	212	209	234
CH217	B3.3	001_bL vehicle emulsion	117	120	136	142	149	145	129	162	200	191	140	129	139	148	131	139	136	133	165	154	185	133	139	128	168	155	141	128	145	187	163	180	151	87	103	188	168	175	177	179	170	180	181	179	175	174	179
CH220	C3.0	000_bL 0.1% Tw80	111	47	11	13	33	19	5	2	7	20	12	5	15	7	22	21	36	34	103	70	104	83	98	73	134	118	124	149	162	135	117	162	190	172	178	116	213	237	166	159	174	176	188	174	166	171	174
CH221	C3.1	000_bL 0.1% Tw80	81	34	30	51	113	171	157	161	107	39	23	5	33	11	71	57	32	39	27	91	79	79	56	56	76	81	130	125	101	131	139	117	185	156	116	152	124	105	134	207	179	212	179	232	250	258	187
CH222	C3.2	000_bL 0.1% Tw80	220	40	56	41	25	22	13	8	21	2	2	5	0	17	19	15	23	22	18	40	43	58	95	80	100	90	95	68	89	83	72	71	82	131	103	75	73	98	95	90	121	140	173	183	198	213	228
CH223	C3.3	000_bL 0.1% Tw80	105	60	30	44	31	17	19	79	56	11	10	9	8	3	27	16	59	68	59	66	100	72	102	108	122	89	89	135	90	138	104	71	119	110	84	102	72	87	131	142	125	158	181	165	184	201	201
CH224	A3.4	002_300ug CBD	38	32	84	59	32	38	5	11	16	14	28	52	33	65	10	4	19	19	0	10	10	12	11	11	19	46	49	18	45	30	44	49	35	70	62	31	52	65	72	62	83	65	70	89	93	59	71
CH225	A3.5	002_300ug CBD	115	29	18	22	26	29	22	24	25	13	9	19	6	5	23	36	8	6	9	7	9	11	24	56	55	31	40	32	34	31	65	54	42	41	31	39	14	44	46	36	115	70	93	55	53	48	64
CH226	A3.6	002_300ug CBD	71	29	16	30	1	14	30	33	19	23	24	44	58	22	8	8	10	6	3	11	43	28	40	73	58	52	82	120	93	93	49	75	81	51	40	40	46	37	41	33	63	81	54	39	55	89	102
CH227	A3.7	002_300ug CBD	124	79	48	61	82	57	50	52	30	69	43	65	42	35	29	14	51	33	53	84	38	35	58	84	93	134	165	128	160	148	147	133	154	157	92	102	66	92	118	150	60	111	43	44	67	85	146
CH228	A3.8	002_300ug CBD	90	84	127	122	151	125	114	187	148	189	160	124	164	185	153	158	159	173	154	172	168	159	135	162	156	156	136	142	140	142	135	182	182	200	172	185	168	162	162	128	139	116	154	162	171	157	185
CH230	B3.4	001_bL vehicle emulsion	45	20	22	31	11	12	20	7	19	10	16	19	40	44	71	57	56	71	64	58	85	80	91	117	147	173	120	129	127	76	63	70	41	47	92	88	109	131	127	166	173	178	173	176	192	194	207
CH231	B3.5	001_bL vehicle emulsion	34	13	18	18	6	3	12	6	6	9	16	27	20	29	42	71	64	85	72	89	69	76	74	67	66	109	104	53	41	110	132	114	120	98	77	148	107	144	145	165	205	189	183	174	186	205	184
CH232	B3.6	001_bL vehicle emulsion	62	26	33	17	19	31	14	34	17	12	21	20	21	42	67	63	46	116	119	99	101	114	66	92	107	98	127	154	176	114	72	30	109	129	120	193	128	140	179	190	212	196	212	234	234	226	224
CH233	B3.7	001_bL vehicle emulsion	83	111	108	109	155	108	89	145	100	121	86	155	139	153	130	189	149	149	140	146	141	138	153	138	167	115	122	102	104	95	179	84	69	92	93	111	128	154	174	230	262	244	236	243	254	239	246
CH235	C3.4	000_bL 0.1% Tw80	60	77	92	43	47	46	47	21	27	16	19	42	64	73	59	78	78	110	128	125	121	113	146	142	137	143	115	133	147	147	157	124	134	137	108	113	122	100	111	136	150	158	163	158	173	151	144
CH236	C3.5	000_bL 0.1% Tw80	72	23	6	15	28	22	7	12	0	2	6	6	9	4	18	59	56	69	28	63	116	102	87	113	78	60	57	89	139	136	180	205	145	52	101	106	45	67	135	117	161	191	202	226	239	220	238
CH237	C3.6	000_bL 0.1% Tw80	87	24	21	31	100	48	19	18	8	5	9	23	51	17	66	34	93	134	119	99	125	106	81	56	40	68	75	132	86	100	106	116	91	167	63	85	127	75	124	169	145	172	156	203	202	201	225
CH238	C3.7	000_bL 0.1% Tw80	181	162	90	175	46	19	17	11	26	48	25	18	33	9	10	16	23	36	58	48	47	64	53	61	76	70	68	64	69	64	106	132	97	76	48	36	39	60	70	107	131	151	201	161	212	219	208
CH239	C3.8	000_bL 0.1% Tw80	171	85	60	105	85	53	43	30	12	6	3	2	16	11	13	12	47	50	74	45	74	114	132	136	136	165	145	126	109	116	102	94	117	95	71	101	91	121	88	134	139	198	240	223	238	233	220
CH240	A3.9	002_300ug CBD	106	87	137	131	168	98	85	169	227	171	54	28	19	12	10	4	7	28	13	15	10	20	27	23	32	85	48	56	51	116	117	80	67	126	149	162	150	175	194	185	186	195	200	185	201	186	161
CH241	A3.10	002_300ug CBD	109	76	34	24	26	30	49	23	29	28	5	7	16	10	8	7	5	2	4	14	9	21	7	12	34	43	43	48	39	44	41	60	89	62	48	44	30	75	47	36	89	119	130	95	40	79	81
CH242	A3.11	002_300ug CBD	93	29	29	62	12	16	45	15	51	97	46	30	33	8	39	18	14	12	7	20	20	105	39	43	62	45	50	75	76	80	107	121	85	94	48	56	84	70	80	66	55	44	47	64	96	139	52
CH243	A3.12	002_300ug CBD	88	71	100	98	83	125	73	112	82	80	76	33	64	69	94	103	89	193	72	100	125	97	105	136	115	155	148	168	169	187	171	155	143	126	89	136	113	120	89	88	66	67	97	106	108	106	108
CH244	A3.13	002_300ug CBD	209	217	216	206	219	204	205	211	199	200	198	199	200	199	184	195	204	191	207	178	182	174	202	199	214	206	197	183	189	186	176	188	178	173	156	141	168	169	183	192	165	157	170	163	164	144	164
CH246	B3.8	001_bL vehicle emulsion	48	20	30	32	8	8	27	31	13	7	20	76	42	31	53	72	84	69	82	60	107	87	125	143	151	85	134	186	165	117	105	137	95	124	141	139	170	144	166	191	169	163	199	161	174	188	172
CH247	B3.9	001_bL vehicle emulsion	56	21	27	45	21	22	23	38	9	16	36	16	33	58	55	83	66	48	69	85	77	86	98	143	127	100	109	75	109	96	89	112	75	90	117	95	111	138	161	158	169	215	190	191	207	211	228
CH248	B3.10	001_bL vehicle emulsion	88	9	28	21	20	10	22	49	56	25	40	49	41	77	79	84	105	114	114	172	126	154	110	108	104	88	69	101	31	147	103	69	80	49	76	115	106	166	209	197	207	247	234	235	242	248	223
CH249	B3.11	001_bL vehicle emulsion	106	98	119	136	139	112	109	169	133	96	139	173	192	217	202	203	196	171	210	204	174	180	170	197	140	124	155	170	94	176	55	27	47	98	84	114	149	165	184	248	236	235	276	262	263	232	258
CH251	C3.9	000_bL 0.1% Tw80	44	37	18	23	26	16	21	25	13	5	10	40	33	71	71	89	69	103	106	130	121	124	137	149	128	111	126	108	94	111	122	132	94	95	105	102	102	104	119	129	139	132	126	152	134	142	141
CH252	C3.10	000_bL 0.1% Tw80	96	23	22	9	71	13	8	35	32	12	2	23	15	9	17	41	59	65	68	89	109	116	106	121	120	139	130	160	78	150	106	84	77	64	149	194	136	152	150	180	118	119	93	138	188	129	145
CH253	C3.11	000_bL 0.1% Tw80	103	35	15	10	17	16	8	43	44	20	38	16	17	18	17	31	48	44	54	66	82	67	97	102	90	110	105	86	57	74	71	77	27	60	30	42	48	70	51	81	151	159	174	190	199	222	196
CH254	C3.12	000_bL 0.1% Tw80	115	35	24	52	84	42	107	186	227	133	61	41	15	45	24	49	42	56	43	76	56	91	87	75	97	82	101	82	100	94	61	49	43	49	75	58	55	58	80	80	112	157	187	210	209	213	228
CH255	C3.13	000_bL 0.1% Tw80	121	130	113	237	220	198	116	127	106	98	99	40	69	49	52	59	85	96	83	96	96	107	114	123	115	125	105	95	137	135	82	82	41	103	109	123	95	118	127	147	168	189	214	184	199	198	209
CH257	A3.14	002_300ug CBD	63	49	53	66	85	23	32	47	28	20	27	20	11	19	11	18	15	26	5	18	41	43	23	40	49	76	110	122	93	93	133	94	114	165	133	144	148	119	84	114	111	115	108	138	102	112	140
CH258	A3.15	002_300ug CBD	104	66	64	50	49	41	90	115	38	69	38	46	25	35	32	28	61	35	24	28	26	45	81	69	87	110	148	168	121	138	135	132	134	110	152	114	92	109	118	82	85	132	88	103	87	73	111
CH259	A3.16	002_300ug CBD	103	82	113	92	150	200	195	205	167	196	167	200	229	188	181	211	209	192	128	180	166	156	167	181	173	189	196	180	172	181	190	169	165	183	164	156	174	166	175	193	202	170	196	188	216	190	188
CH262	B3.12	001_bL vehicle emulsion	63	45	25	25	32	34	29	45	34	52	41	55	76	112	90	95	83	93	94	127	143	134	148	140	124	135	127	144	161	181	188	159	162	163	180	178	162	185	180	177	167	154	159	151	174	161	161
CH263	B3.13	001_bL vehicle emulsion	71	44	43	43	25	33	27	28	30	90	79	70	62	125	83	116	126	115	112	107	114	78	128	134	118	148	122	114	172	153	134	167	139	180	142	172	186	169	172	178	142	163	151	169	168	166	162
CH264	B3.14	001_bL vehicle emulsion	193	88	104	71	56	30	28	13	40	31	50	66	75	79	117	112	148	170	169	158	177	184	158	134	159	144	153	132	137	151	137	122	91	68	134	124	145	159	173	191	211	230	226	240	224	231	241
CH265	B3.15	001_bL vehicle emulsion	110	96	84	102	124	144	139	163	163	176	160	176	172	177	206	189	189	202	188	208	172	184	190	192	204	169	161	145	174	184	194	135	173	166	175	175	171	190	185	159	175	180	162	160	177	182	180
CH268	C3.14	000_bL 0.1% Tw80	60	59	78	55	80	86	137	140	177	111	36	120	109	149	151	172	154	153	158	149	171	175	170	172	187	172	186	166	182	162	163	205	189	222	192	194	199	192	225	203	194	179	191	188	191	185	175
CH269	C3.15	000_bL 0.1% Tw80	72	95	76	66	76	28	23	34	34	3	11	16	19	35	32	53	108	103	162	147	152	144	149	123	126	152	115	146	101	125	149	126	59	82	97	105	90	80	130	99	169	181	165	158	175	200	211
CH270	C3.16	000_bL 0.1% Tw80	119	61	37	89	91	26	38	133	90	192	119	101	150	192	212	180	205	200	193	176	134	133	138	103	93	135	114	101	80	90	81	137	125	52	108	111	114	131	134	141	168	181	190	188	173	159	178
CH289	A4.0	003_500ug CBD	59	43	19	8	9	9	11	33	47	24	20	31	26	23	43	26	40	26	44	43	37	71	68	85	124	110	124	114	121	117	126	118	122	115	102	164	154	125	134	119	131	139	149	158	151	156	157
CH290	A4.1	003_500ug CBD	77	51	9	15	23	18	32	62	29	58	16	162	33	57	81	82	96	139	108	34	69	165	130	84	207	135	141	181	212	154	178	198	191	148	153	153	156	181	215	219	204	185	174	191	212	236	220
CH295	B4.0	002_300ug CBD	66	37	16	16	17	93	26	26	29	13	29	22	26	73	74	15	10	22	21	25	13	31	70	57	60	64	61	111	106	111	117	102	131	117	162	116	128	169	193	158	163	152	167	174	160	157	160
CH296	B4.1	002_300ug CBD	199	176	108	35	28	17	24	32	53	24	28	26	21	35	44	52	52	112	52	45	88	61	88	147	123	87	111	169	128	119	163	179	115	178	129	114	148	147	118	157	184	167	191	206	179	207	212
CH301	C4.0	001_bL vehicle emulsion	174	104	22	16	33	32	11	12	20	9	16	67	20	75	73	92	78	79	90	61	57	124	89	112	103	75	138	117	65	68	73	72	101	165	122	139	168	181	187	172	175	181	190	183	178	185	183
CH302	C4.1	001_bL vehicle emulsion	252	226	136	73	55	20	12	28	13	24	8	30	33	56	63	50	62	78	75	79	89	158	113	103	109	69	74	88	123	109	158	200	148	213	177	194	189	189	157	184	166	177	159	167	172	155	144
CH304	A4.2	003_500ug CBD	36	26	17	15	12	17	19	43	41	55	59	62	73	59	125	101	79	90	112	68	116	124	89	62	69	78	51	69	109	80	106	134	129	116	116	121	190	150	151	161	173	199	171	179	180	184	183
CH305	A4.3	003_500ug CBD	70	14	46	32	24	49	25	14	4	37	13	19	28	17	17	19	21	47	11	18	36	18	24	37	23	26	24	57	73	28	34	68	38	50	57	87	87	110	128	129	121	91	90	74	70	138	94
CH306	A4.4	003_500ug CBD	75	60	17	10	13	13	79	16	17	39	36	22	31	29	21	36	9	40	57	14	29	38	38	38	31	43	19	8	15	18	36	50	80	67	127	79	83	108	83	121	122	118	120	99	83	85	69
CH307	A4.5	003_500ug CBD	87	67	102	116	113	153	129	97	174	72	68	119	98	116	101	125	152	179	189	176	184	190	164	137	164	100	96	99	150	160	145	195	187	144	136	179	186	142	187	166	174	159	150	123	129	98	124
CH310	B4.2	002_300ug CBD	126	70	65	107	148	76	132	135	80	58	44	85	134	184	52	96	50	39	19	11	19	52	99	69	85	104	111	135	139	167	162	183	201	185	166	206	165	124	184	139	156	149	162	171	168	171	198
CH311	B4.3	002_300ug CBD	101	48	42	18	15	37	41	14	11	15	14	19	5	5	9	12	23	9	26	131	118	162	105	37	47	54	91	85	93	114	101	171	146	154	119	134	120	173	179	186	160	181	158	144	145	178	125
CH312	B4.4	002_300ug CBD	83	22	4	31	48	21	16	10	3	33	11	22	48	21	33	38	88	40	59	39	40	33	51	44	69	74	88	109	119	124	145	145	138	148	161	98	131	164	170	119	118	144	138	135	122	118	126
CH313	B4.5	002_300ug CBD	98	86	92	161	85	111	169	123	91	90	91	83	102	134	125	161	152	166	121	124	167	143	162	150	130	125	138	134	141	99	137	161	131	118	78	109	126	130	84	123	155	204	172	176	173	126	154
CH316	C4.2	001_bL vehicle emulsion	42	52	45	39	14	13	2	1	14	11	13	18	12	31	76	34	65	56	65	72	40	46	64	77	72	58	138	126	98	116	88	66	106	163	158	225	243	269	239	204	223	232	231	239	238	260	270
CH317	C4.3	001_bL vehicle emulsion	70	22	14	19	9	13	8	33	6	13	18	29	39	28	34	83	47	61	40	88	45	93	84	78	109	101	67	93	103	78	103	105	122	69	79	66	132	170	125	113	164	202	211	225	227	235	225
CH318	C4.4	001_bL vehicle emulsion	65	63	30	28	40	69	21	43	53	23	52	57	88	61	64	88	46	65	80	93	82	94	104	126	157	109	61	94	67	68	51	81	32	22	29	40	36	74	69	113	125	122	152	171	172	156	208
CH319	C4.5	001_bL vehicle emulsion	127	184	136	110	106	91	49	93	84	49	70	110	141	103	123	139	128	143	163	160	136	149	144	135	187	154	132	119	104	78	75	81	117	60	80	86	72	105	130	134	144	138	152	187	186	229	230
CH320	A4.6	003_500ug CBD	37	23	28	36	9	44	14	6	24	44	6	34	12	12	5	19	101	33	29	27	2	4	38	16	17	18	31	50	29	7	14	29	9	15	41	38	42	79	58	76	77	58	70	95	76	105	132
CH321	A4.7	003_500ug CBD	129	17	14	4	23	3	9	13	18	34	19	36	12	12	9	14	3	5	9	8	15	6	6	13	0	6	7	4	38	29	15	32	25	34	32	39	58	55	59	53	47	52	33	41	58	44	49
CH322	A4.8	003_500ug CBD	118	16	27	37	6	20	17	33	26	17	35	23	13	10	4	5	23	20	7	19	13	6	15	8	11	12	12	6	19	20	40	23	31	35	56	59	55	51	80	64	75	61	84	63	77	56	71
CH323	A4.9	003_500ug CBD	130	99	80	78	49	65	67	140	132	99	72	70	30	87	92	63	70	79	61	38	41	24	24	11	22	51	33	36	49	22	66	63	89	116	98	124	132	135	158	113	162	141	137	135	133	111	98
CH324	A4.10	003_500ug CBD	108	92	114	116	128	167	151	159	176	183	201	167	182	169	201	205	195	202	184	212	168	208	191	181	192	206	191	193	193	173	174	179	180	166	140	166	160	159	138	172	170	179	147	156	137	169	148
CH326	B4.6	002_300ug CBD	69	92	13	19	31	48	40	31	91	75	70	16	21	11	9	4	82	91	64	41	36	62	140	172	124	76	123	130	63	164	56	53	66	80	84	73	106	106	101	150	189	168	93	58	61	70	48
CH327	B4.7	002_300ug CBD	55	15	23	21	15	8	7	3	25	22	16	23	13	10	9	17	8	20	5	14	9	22	11	35	38	41	40	68	73	82	88	120	98	64	64	86	93	65	48	85	161	156	104	106	85	125	122
CH328	B4.8	002_300ug CBD	89	49	65	35	43	16	43	16	73	17	7	31	25	42	12	30	33	31	22	18	16	27	31	43	69	97	72	75	89	113	134	145	112	129	124	136	105	105	80	125	86	84	50	38	58	55	64
CH329	B4.9	002_300ug CBD	107	75	88	107	117	105	132	89	95	87	106	90	154	138	122	98	125	150	120	138	145	99	128	110	149	174	178	192	167	167	179	177	178	167	184	136	162	152	164	141	142	117	117	126	84	98	94
CH331	C4.6	001_bL vehicle emulsion	37	32	17	10	9	4	17	7	10	17	16	23	29	55	65	91	89	94	134	127	145	104	174	125	146	171	188	147	115	102	99	69	62	94	57	127	128	145	132	154	147	168	161	144	158	163	149
CH332	C4.7	001_bL vehicle emulsion	43	16	20	9	4	21	4	12	18	8	9	15	20	25	25	46	35	39	58	53	61	63	59	41	52	116	167	83	75	111	58	58	43	90	108	132	109	73	118	186	158	143	184	186	163	190	176
CH333	C4.8	001_bL vehicle emulsion	93	61	19	10	3	9	16	26	7	15	9	10	28	23	20	33	30	43	33	46	53	74	57	37	45	55	68	28	16	21	21	40	5	11	13	23	38	55	70	145	218	209	190	206	216	183	214
CH334	C4.9	001_bL vehicle emulsion	51	38	27	26	14	39	1	21	22	9	18	12	26	44	37	80	55	68	76	99	87	73	58	61	58	66	30	47	58	38	25	16	17	32	18	13	51	41	58	71	108	142	162	158	128	138	158
CH335	C4.10	001_bL vehicle emulsion	114	158	122	101	126	144	178	182	170	171	213	220	222	214	198	211	230	231	177	173	161	175	175	132	118	123	136	101	104	69	55	38	44	43	69	64	75	87	119	140	127	143	161	185	156	183	184
CH336	A4.11	003_500ug CBD	79	35	42	34	5	17	16	4	24	11	22	20	16	12	6	11	21	27	12	11	17	16	8	8	6	12	51	25	24	20	19	12	18	58	48	50	58	31	50	45	37	78	74	87	102	80	110
CH337	A4.12	003_500ug CBD	112	35	63	80	117	69	13	22	3	36	13	11	5	15	2	12	3	6	2	6	8	4	5	7	2	5	4	13	10	5	16	30	19	25	24	51	66	57	44	58	68	64	58	67	54	56	90
CH338	A4.13	003_500ug CBD	166	66	91	128	83	22	47	66	38	46	30	38	26	18	7	9	15	10	5	12	7	21	44	34	23	26	22	18	7	16	10	27	40	37	46	70	88	87	100	115	77	85	65	68	42	57	77
CH339	A4.14	003_500ug CBD	147	113	117	92	108	70	99	103	132	94	99	97	131	83	91	60	96	89	67	79	69	45	98	70	49	25	26	15	23	51	49	83	81	113	128	136	140	167	160	154	165	126	165	177	137	130	156
CH342	B4.10	002_300ug CBD	109	40	60	63	101	129	92	95	26	130	96	81	33	55	112	98	64	30	11	12	12	15	24	39	45	41	45	50	52	50	54	46	96	79	58	61	111	110	177	189	133	121	137	125	147	122	170
CH343	B4.11	002_300ug CBD	99	61	24	35	36	49	28	75	74	10	27	14	6	37	36	22	52	47	29	21	10	25	14	43	51	69	48	52	66	36	55	51	68	69	62	105	47	47	85	94	68	41	32	31	52	30	52
CH344	B4.12	002_300ug CBD	117	49	70	94	25	52	94	98	35	49	45	14	35	51	33	42	60	78	21	31	72	57	57	76	65	82	116	136	95	84	173	150	97	96	98	128	147	124	82	76	39	37	76	62	59	70	120
CH345	B4.13	002_300ug CBD	107	102	130	146	73	64	90	121	149	115	123	136	145	141	122	116	156	163	158	121	101	148	148	163	143	162	197	177	165	171	157	138	142	150	153	141	148	120	126	152	113	126	137	129	63	97	130
CH348	C4.11	001_bL vehicle emulsion	70	23	45	24	18	3	10	29	2	36	46	17	28	19	46	40	104	65	77	71	57	61	92	110	49	79	64	59	63	123	123	146	58	96	98	50	90	128	207	172	181	193	177	197	207	196	178
CH349	C4.12	001_bL vehicle emulsion	54	13	25	18	9	8	7	10	11	5	13	7	22	36	35	44	29	47	28	27	29	66	44	41	45	57	27	27	28	21	12	25	13	20	34	20	37	62	59	104	194	178	183	194	214	201	222
CH350	C4.13	001_bL vehicle emulsion	51	31	31	10	11	23	8	9	21	27	48	42	81	26	71	66	36	52	59	112	92	102	100	102	68	90	87	113	45	35	111	87	36	28	9	24	32	46	80	80	100	141	119	130	137	137	139
CH351	C4.14	001_bL vehicle emulsion	110	180	163	155	134	75	71	68	134	126	109	97	118	114	137	174	142	154	131	146	178	208	157	191	195	194	176	122	163	151	129	115	119	140	88	103	94	148	110	124	152	112	153	123	155	175	177
CH353	A4.15	003_500ug CBD	104	54	56	41	20	14	17	59	114	51	69	60	8	14	52	36	61	53	28	28	33	25	12	26	62	19	23	44	36	27	20	21	18	50	107	70	114	137	129	151	139	170	181	163	163	154	187
CH354	A4.16	003_500ug CBD	134	67	87	69	32	20	47	24	34	13	63	45	90	85	27	29	26	45	33	27	59	123	73	19	38	43	39	73	96	28	27	39	92	84	81	141	150	154	158	146	150	162	172	143	134	160	163
CH359	B4.14	002_300ug CBD	105	86	113	136	114	85	129	119	45	12	23	26	121	61	18	95	32	23	28	32	24	32	28	45	56	81	40	110	129	161	168	114	147	152	133	127	172	113	112	113	150	117	163	114	117	139	139
CH360	B4.15	002_300ug CBD	96	89	146	165	88	40	67	59	59	66	66	44	88	91	48	50	64	61	54	81	69	74	91	151	79	120	117	109	169	105	97	114	159	125	165	129	156	162	141	126	113	174	142	131	146	153	154
CH365	C4.15	001_bL vehicle emulsion	68	45	41	36	21	17	17	8	3	13	18	12	16	27	20	58	87	40	47	58	53	48	26	69	119	113	119	40	70	35	28	74	43	59	37	50	54	117	130	124	131	116	148	105	131	154	173
CH366	C4.16	001_bL vehicle emulsion	76	91	85	67	66	42	33	68	53	19	26	45	81	81	139	92	82	92	68	78	87	51	78	83	98	144	97	140	118	199	136	99	76	72	60	83	111	130	88	135	134	149	144	169	137	175	160
[truncated: 83 more columns]

## Sheet: wDAT+ Extr. ex1
DATE:	2023-10-28 18:52:18							2023-10-24	feed L1s @ 4:14pm
FILE:	C:\Software\wmicrotracker\p00013\20231025_1905							2023-10-24	start wDAT+ recording @5:04pm
SUBPROJECT:	2023 1025-27 wDAT+ extract 300-750eq ex1 bR							2023-10-25	restart wDAT+ recording @ 7:02on after washing and feeding
									= this starts at 27h
<<<<<< Group Activity: Average Activity Counts per Data Interval>>>>>>
Group/Time[m]	30	60	90	120	150	180	210	240	270	300	330	360	390	420	450	480	510	540	570	600	630	660	690	720	750	780	810	840	870	900	930	960	990	1020	1050	1080	1110	1140	1170	1200	1230	1260	1290	1320	1350	1380	1410	1440	1470
000_bR 0.1% Tw80	77	65	79	71	63	59	59	50	55	59	56	54	54	52	61	63	74	81	94	104	110	116	116	115	118	115	120	117	113	108	113	111	107	102	101	93	90	95	105	120	132	148	161	168	177	180	190	194	194
001_bR vehicle emulsion	82	73	84	67	62	67	57	59	55	61	59	61	65	78	90	99	110	128	132	128	133	136	131	130	130	127	125	122	111	110	101	98	98	97	104	120	134	147	163	174	184	188	195	197	197	196	203	199	203
002_300ug CBD eq in extract	84	85	84	82	85	84	90	86	84	75	80	70	75	75	76	62	74	77	84	82	81	92	96	100	108	116	116	121	128	130	130	131	131	128	126	124	122	122	127	126	116	116	117	114	120	125	136	150	164
003_500ug CBD eq in extract	76	79	67	55	58	60	52	58	59	60	62	64	61	64	63	66	65	68	66	68	64	63	66	70	68	66	67	69	78	77	84	90	100	106	110	116	118	124	124	132	126	126	126	128	124	122	118	122	120
004_750ug CBD eq in extract	60	54	62	60	57	54	45	48	48	48	51	58	49	62	59	63	68	69	71	72	70	73	75	78	84	82	86	82	80	84	86	90	83	94	90	83	87	89	98	93	88	90	100	102	104	106	118	116	128
hours	27	27.5	28	28.5	29	29.5	30	30.5	31	31.5	32	32.5	33	33.5	34	34.5	35	35.5	36	36.5	37	37.5	38	38.5	39	39.5	40	40.5	41	41.5	42	42.5	43	43.5	44	44.5	45	45.5	46	46.5	47	47.5	48	48.5	49	49.5	50	50.5	51
<<<<<< Group Activity: Standard Error >>>>>>
Group/Time[m]	30	60	90	120	150	180	210	240	270	300	330	360	390	420	450	480	510	540	570	600	630	660	690	720	750	780	810	840	870	900	930	960	990	1020	1050	1080	1110	1140	1170	1200	1230	1260	1290	1320	1350	1380	1410	1440	1470
000_bR 0.1% Tw80	4.6	3.5	6.9	5.8	3.5	9.2	5.8	3.5	1.2	4.6	2.3	2.3	2.9	4.6	5.2	6.4	9.2	8.7	6.9	9.8	13.3	8.7	10.4	6.4	6.9	9.8	10.4	8.1	8.1	10.4	9.8	8.1	8.7	11.5	13.9	12.7	13.9	12.1	13.3	11	6.9	10.4	6.4	4	6.9	6.4	6.4	6.9	8.1
001_bR vehicle emulsion	5.2	8.1	9.8	9.2	8.7	4.6	6.9	7.5	5.8	7.5	5.8	5.8	4	9.2	8.7	13.9	12.7	11	13.9	12.7	9.2	8.7	10.4	7.5	6.9	9.2	14.4	11	1.2	6.9	4	6.9	6.4	10.4	9.2	14.4	14.4	18.5	16.7	14.4	13.3	12.7	11	11.5	8.7	6.9	5.2	6.4	8.7
002_300ug CBD eq in extract	5.7	0.7	0.7	3.5	2.8	5.7	11.3	5.7	4.2	4.2	2.1	0.7	4.2	7.8	5.7	9.9	9.9	7.8	0.7	3.5	7.8	8.5	3.5	2.8	3.5	0.7	0	5.7	1.4	0.7	2.1	0	2.8	4.2	3.5	0.7	10.6	9.2	16.3	5.7	7.8	9.2	11.3	2.8	4.2	0.7	5.7	7.8	6.4
003_500ug CBD eq in extract	0.7	0.7	12	7.1	9.2	8.5	11.3	8.5	17.7	9.2	4.2	4.2	7.1	0.7	7.8	1.4	2.1	3.5	7.8	5.7	0	4.9	11.3	8.5	9.2	5.7	4.2	5.7	0.7	4.2	4.2	2.8	1.4	0.7	2.8	1.4	1.4	0.7	4.2	3.5	2.1	5.7	8.5	4.2	1.4	4.2	7.8	4.2	4.9
004_750ug CBD eq in extract	6.4	5.7	5.7	0.7	11.3	12.7	9.9	12	2.8	4.2	4.2	3.5	0.7	1.4	9.2	9.9	1.4	7.1	2.8	4.9	0	2.1	4.9	4.2	7.1	2.8	1.4	2.1	2.8	3.5	4.2	2.1	2.8	3.5	2.8	2.1	4.9	0.7	7.8	0.7	4.2	2.8	4.9	2.8	1.4	0.7	4.2	6.4	8.5
<<<<<< Group Activity: Number of wells/group >>>>>>
Group/Time[m]	30	60	90	120	150	180	210	240	270	300	330	360	390	420	450	480	510	540	570	600	630	660	690	720	750	780	810	840	870	900	930	960	990	1020	1050	1080	1110	1140	1170	1200	1230	1260	1290	1320	1350	1380	1410	1440	1470
000_bR 0.1% Tw80	3	3	3	3	3	3	3	3	3	3	3	3	3	3	3	3	3	3	3	3	3	3	3	3	3	3	3	3	3	3	3	3	3	3	3	3	3	3	3	3	3	3	3	3	3	3	3	3	3
001_bR vehicle emulsion	3	3	3	3	3	3	3	3	3	3	3	3	3	3	3	3	3	3	3	3	3	3	3	3	3	3	3	3	3	3	3	3	3	3	3	3	3	3	3	3	3	3	3	3	3	3	3	3	3
002_300ug CBD eq in extract	2	2	2	2	2	2	2	2	2	2	2	2	2	2	2	2	2	2	2	2	2	2	2	2	2	2	2	2	2	2	2	2	2	2	2	2	2	2	2	2	2	2	2	2	2	2	2	2	2
003_500ug CBD eq in extract	2	2	2	2	2	2	2	2	2	2	2	2	2	2	2	2	2	2	2	2	2	2	2	2	2	2	2	2	2	2	2	2	2	2	2	2	2	2	2	2	2	2	2	2	2	2	2	2	2
004_750ug CBD eq in extract	2	2	2	2	2	2	2	2	2	2	2	2	2	2	2	2	2	2	2	2	2	2	2	2	2	2	2	2	2	2	2	2	2	2	2	2	2	2	2	2	2	2	2	2	2	2	2	2	2
<<<<<< Number of Samples per Acquisition Interval [1unit=500values] >>>>>>
Time[m]	30	60	90	120	150	180	210	240	270	300	330	360	390	420	450	480	510	540	570	600	630	660	690	720	750	780	810	840	870	900	930	960	990	1020	1050	1080	1110	1140	1170	1200	1230	1260	1290	1320	1350	1380	1410	1440	1470
#Samples	30	30	30	30	30	30	30	30	30	30	30	30	30	30	30	30	30	30	30	30	30	30	30	30	30	30	30	30	30	30	30	30	30	30	30	30	30	30	30	30	30	30	30	30	30	30	30	30	30
<<<<<< Average Temperature [°C] >>>>>>
Time[m]	30	60	90	120	150	180	210	240	270	300	330	360	390	420	450	480	510	540	570	600	630	660	690	720	750	780	810	840	870	900	930	960	990	1020	1050	1080	1110	1140	1170	1200	1230	1260	1290	1320	1350	1380	1410	1440	1470
Temp[°C]	23.2	23.4	23.4	23.4	23.4	23.4	23.4	23.4	23.4	23.4	23.4	23.4	23.4	23.4	23.4	23.4	23.4	23.4	23.4	23.4	23.4	23.4	23.4	23.4	23.4	23.4	23.4	23.4	23.4	23.4	23.4	23.4	23.4	23.4	23.4	23.4	23.4	23.4	23.4	23.4	23.4	23.4	23.4	23.4	23.4	23.4	23.4	23.4	23.4
<<<<<< Well Activity >>>>>>
Well	Group/Time[m]	30	60	90	120	150	180	210	240	270	300	330	360	390	420	450	480	510	540	570	600	630	660	690	720	750	780	810	840	870	900	930	960	990	1020	1050	1080	1110	1140	1170	1200	1230	1260	1290	1320	1350	1380	1410	1440
A1	000_bR 0.1% Tw80	82	59	73	69	56	40	47	43	53	54	57	52	57	52	59	61	67	77	98	104	106	107	112	109	109	99	101	104	102	89	94	94	90	80	78	76	66	73	87	106	125	136	157	168	168	169	179	182
B1	004_750ug CBD eq in extract	54	49	67	60	46	41	35	36	45	43	47	54	48	60	50	53	66	62	68	77	70	75	80	82	77	79	85	80	77	87	82	88	80	91	87	81	82	88	90	92	83	87	95	99	106	106	114	110
C1	003_500ug CBD eq in extract	76	78	55	48	48	52	41	50	41	51	58	60	54	64	71	67	63	64	74	74	64	68	77	78	77	72	71	75	77	73	80	88	98	105	107	115	116	125	128	128	128	132	135	132	122	126	126	127
A2	001_bR vehicle emulsion	90	89	104	85	78	75	65	63	66	75	67	69	72	91	99	115	119	137	152	147	144	147	141	142	139	132	133	120	110	101	95	84	86	89	103	117	138	164	180	190	199	205	209	207	207	202	205	204
B2	000_bR 0.1% Tw80	81	66	72	63	66	71	64	54	55	68	59	59	57	60	71	75	92	98	103	120	134	134	136	128	132	132	137	132	128	124	124	119	120	118	126	118	114	115	131	141	146	169	173	175	191	191	201	205
C2	004_750ug CBD eq in extract	67	60	56	61	68	66	55	60	50	52	55	61	50	63	68	73	69	76	74	67	70	71	70	73	91	84	88	84	83	80	91	92	86	98	93	85	92	90	106	94	92	93	105	105	103	107	122	123
A3	002_300ug CBD eq in extract	90	86	85	86	88	90	101	81	89	79	82	71	79	83	81	72	84	85	84	85	89	100	99	98	112	115	116	127	129	129	132	131	128	124	123	123	111	113	111	120	109	106	106	111	124	126	130	158
B3	001_bR vehicle emulsion	82	66	74	53	58	68	64	69	51	58	63	63	66	82	99	111	125	140	140	133	141	143	142	131	135	139	145	141	110	105	109	107	107	118	120	146	157	166	179	186	196	197	203	209	204	204	210	207
C3	000_bR 0.1% Tw80	68	70	93	82	67	65	66	54	56	55	52	51	48	45	53	54	62	69	80	87	89	108	100	109	114	114	121	115	108	112	122	119	111	108	99	86	91	96	97	112	126	139	153	161	173	180	191	196
A4	003_500ug CBD eq in extract	75	80	79	62	67	69	63	67	77	70	67	68	68	63	55	64	67	71	58	62	64	58	55	61	59	60	63	63	78	81	89	93	101	107	113	118	119	123	119	135	124	121	118	124	125	117	110	118
B4	002_300ug CBD eq in extract	78	84	83	79	82	78	79	92	80	71	78	69	71	67	70	52	64	69	83	78	73	83	92	103	105	117	116	115	126	131	128	131	134	132	130	125	132	131	143	132	124	125	128	117	115	124	141	142
C4	001_bR vehicle emulsion	73	65	74	64	49	59	43	44	47	49	48	50	58	60	73	72	85	106	105	104	115	119	111	116	116	109	97	104	114	123	99	102	101	84	89	96	108	110	130	145	157	163	174	174	179	183	193	187
<<<<<< Channel Activity >>>>>>
Channel	Well	Group/Time[m]	30	60	90	120	150	180	210	240	270	300	330	360	390	420	450	480	510	540	570	600	630	660	690	720	750	780	810	840	870	900	930	960	990	1020	1050	1080	1110	1140	1170	1200	1230	1260	1290	1320	1350	1380	1410
CH17	A1.0	000_bR 0.1% Tw80	15	34	8	4	1	0	0	0	0	0	0	0	0	0	0	0	0	0	0	0	0	0	0	0	0	0	0	0	0	0	0	0	0	0	0	0	0	0	0	0	0	0	0	0	0	0	0
CH18	A1.1	000_bR 0.1% Tw80	118	203	97	38	23	20	26	36	3	26	8	2	41	43	14	16	21	54	65	142	79	88	131	141	115	119	158	164	154	138	150	155	142	171	141	102	63	52	126	155	179	182	192	218	200	216	232
CH23	B1.0	004_750ug CBD eq in extract	23	77	236	214	68	5	5	0	0	0	0	0	0	0	0	0	0	0	0	0	0	0	0	0	0	74	20	20	21	48	17	47	23	9	41	10	6	11	38	15	18	10	14	44	110	20	30
CH24	B1.1	004_750ug CBD eq in extract	27	30	77	23	17	29	9	14	12	9	19	18	13	17	5	14	16	8	25	26	26	10	46	36	34	52	58	52	10	37	23	60	14	36	18	18	35	16	20	36	23	29	52	68	110	136	118
CH29	C1.0	003_500ug CBD eq in extract	108	121	145	38	15	1	1	0	0	0	0	0	0	0	0	0	0	0	0	0	0	0	0	0	0	0	0	0	0	0	0	0	1	1	0	0	0	0	0	0	4	6	3	8	0	1	0
CH30	C1.1	003_500ug CBD eq in extract	50	75	69	44	45	71	24	40	15	52	13	20	34	15	22	7	30	25	9	21	13	6	4	16	19	15	13	14	17	20	17	38	50	61	48	75	90	107	131	136	136	138	132	142	105	95	126
CH32	A1.2	000_bR 0.1% Tw80	67	28	60	68	4	0	0	0	0	18	33	33	55	45	25	6	19	18	37	41	47	32	45	23	44	25	19	14	15	10	6	10	11	8	24	34	0	3	21	20	16	19	18	32	35	51	32
CH33	A1.3	000_bR 0.1% Tw80	56	13	31	30	108	58	31	21	1	5	27	4	9	19	6	15	13	35	52	62	77	64	58	68	63	61	83	55	43	29	39	52	37	13	20	20	21	21	51	60	74	119	154	152	177	167	191
CH34	A1.4	000_bR 0.1% Tw80	72	52	52	57	52	30	34	14	16	15	6	15	20	8	20	15	42	55	71	95	103	88	103	102	81	83	76	50	53	46	34	24	32	22	25	36	24	30	52	88	132	136	156	181	191	203	188
CH35	A1.5	000_bR 0.1% Tw80	51	80	125	99	40	37	53	53	39	61	6	41	27	6	40	30	59	75	85	104	143	135	144	147	159	148	144	144	107	97	103	92	88	80	58	51	46	48	82	121	150	153	211	216	203	220	232
CH38	B1.2	004_750ug CBD eq in extract	32	20	31	28	16	12	1	17	0	10	5	7	2	24	10	5	18	24	51	16	17	34	23	14	23	22	22	30	28	20	22	22	12	30	32	16	17	38	25	17	25	25	34	30	23	39	67
CH39	B1.3	004_750ug CBD eq in extract	22	15	2	9	10	40	23	16	56	58	36	34	13	11	11	20	18	14	14	23	43	25	37	23	20	8	34	16	9	19	21	24	10	26	42	35	36	34	19	23	17	22	15	43	37	33	34
CH40	B1.4	004_750ug CBD eq in extract	20	11	13	20	19	15	26	24	26	33	33	33	43	35	49	51	68	60	46	40	59	46	66	80	45	48	82	108	84	69	42	39	12	22	23	18	39	30	31	26	45	45	52	36	62	61	101
CH41	B1.5	004_750ug CBD eq in extract	76	39	10	45	29	82	46	45	47	45	77	73	43	76	114	91	94	116	123	125	71	108	117	121	161	130	141	103	94	134	83	126	101	185	86	132	102	88	151	138	75	93	79	113	171	132	126
CH44	C1.2	003_500ug CBD eq in extract	77	55	43	17	10	58	15	17	6	24	95	26	24	55	6	60	44	66	36	101	43	36	15	50	22	12	9	7	11	30	32	39	78	84	57	52	70	77	90	147	111	149	92	137	93	141	113
CH45	C1.3	003_500ug CBD eq in extract	44	47	24	7	15	10	37	39	36	31	28	16	22	27	14	12	14	15	14	21	13	11	25	6	17	27	17	6	31	49	59	36	37	43	50	47	48	73	66	42	62	85	116	108	122	120	60
CH46	C1.4	003_500ug CBD eq in extract	27	48	23	29	66	84	42	46	61	68	4	24	37	23	12	26	28	32	134	95	3	9	21	32	10	6	22	21	25	26	28	39	51	48	101	90	115	101	123	146	110	92	122	126	97	105	106
CH47	C1.5	003_500ug CBD eq in extract	71	79	89	96	114	132	98	100	66	79	104	105	102	77	85	96	96	121	90	29	21	40	81	49	19	85	43	61	59	60	59	45	97	111	123	132	141	160	166	141	134	139	124	153	151	110	168
CH48	A1.6	000_bR 0.1% Tw80	51	22	135	137	84	10	27	14	31	26	11	9	5	12	19	8	32	59	50	53	67	96	94	86	96	70	121	120	124	71	119	86	124	132	122	92	84	89	107	161	151	126	152	147	168	174	189
CH49	A1.7	000_bR 0.1% Tw80	108	22	42	33	24	14	9	11	5	7	16	3	5	7	9	14	20	40	56	58	62	62	56	64	59	43	29	53	49	39	68	98	39	52	8	18	15	19	30	48	84	100	119	148	172	159	188
CH50	A1.8	000_bR 0.1% Tw80	81	34	61	49	29	33	62	77	69	9	13	7	12	16	32	30	38	44	116	101	104	117	136	95	77	101	80	141	77	48	27	54	44	19	28	26	18	71	42	71	83	118	144	174	176	187	219
CH51	A1.9	000_bR 0.1% Tw80	59	51	107	129	49	35	53	66	107	42	71	20	21	21	35	28	47	61	102	141	167	139	137	156	147	128	115	106	78	107	134	120	111	60	64	55	51	52	65	110	138	161	198	218	221	234	243
CH52	A1.10	000_bR 0.1% Tw80	105	144	209	187	196	216	198	173	193	222	217	220	236	239	240	237	205	195	217	198	190	196	165	183	157	152	137	166	176	148	166	215	188	188	182	203	196	192	194	185	200	176	187	169	159	177	173
CH54	B1.6	004_750ug CBD eq in extract	10	10	21	19	28	31	22	39	8	6	12	33	7	10	14	24	41	0	24	38	37	22	27	26	23	39	56	23	17	30	30	38	38	25	47	18	10	29	27	18	55	48	37	48	49	88	99
CH55	B1.7	004_750ug CBD eq in extract	24	20	16	15	3	8	16	9	18	21	24	25	40	64	22	25	26	6	38	40	14	29	27	55	60	48	31	14	40	49	44	52	55	58	36	29	16	26	19	26	13	49	32	34	26	39	41
CH56	B1.8	004_750ug CBD eq in extract	28	15	14	24	11	10	17	12	61	46	54	48	34	51	40	43	105	70	54	49	51	71	65	66	80	44	53	59	34	48	69	85	52	23	43	26	33	47	30	53	32	51	86	87	54	63	75
CH57	B1.9	004_750ug CBD eq in extract	73	79	31	15	44	89	55	60	63	90	104	161	112	133	125	141	140	149	202	183	143	155	155	135	137	150	146	121	115	149	102	111	108	109	105	101	124	150	114	133	113	88	108	116	83	107	135
CH59	C1.6	003_500ug CBD eq in extract	131	39	3	7	13	4	15	16	40	29	34	33	18	37	21	51	32	37	40	32	54	63	40	23	102	134	100	48	85	52	59	79	104	105	106	109	108	92	106	97	117	117	101	110	115	145	165
CH60	C1.7	003_500ug CBD eq in extract	54	26	10	5	8	2	31	36	19	13	63	38	15	24	83	8	16	43	35	12	28	102	82	28	39	44	25	27	44	23	46	55	94	85	105	104	75	129	132	80	110	85	118	80	123	163	122
CH61	C1.8	003_500ug CBD eq in extract	70	33	33	21	30	69	30	56	48	34	38	37	55	90	83	27	65	19	7	15	4	16	13	17	18	17	22	15	27	33	55	69	59	58	58	79	102	136	94	114	119	118	141	116	122	75	99
CH62	C1.9	003_500ug CBD eq in extract	81	43	38	57	42	71	47	76	68	59	73	51	60	17	68	84	99	64	48	94	64	22	28	21	36	53	35	58	42	34	44	57	113	107	120	157	160	132	151	127	145	144	182	134	111	123	118
CH63	C1.10	003_500ug CBD eq in extract	157	171	107	158	124	133	112	134	63	101	135	111	137	149	106	133	104	65	154	128	110	103	81	140	120	94	84	79	74	79	114	141	110	76	118	152	121	171	157	171	104	135	171	113	100	101	115
CH64	A1.11	000_bR 0.1% Tw80	51	19	20	25	40	11	32	31	41	71	146	91	54	56	81	117	90	140	142	156	171	185	199	184	218	180	219	240	233	204	223	199	220	238	211	225	232	258	229	289	281	290	270	258	284	275	274
CH65	A1.12	000_bR 0.1% Tw80	49	11	30	29	20	19	40	5	9	3	15	3	2	12	23	23	41	37	75	76	63	88	101	84	97	65	35	54	111	97	93	47	46	62	88	72	51	43	63	87	116	158	175	198	179	188	203
CH66	A1.13	000_bR 0.1% Tw80	54	17	38	51	57	40	23	26	15	22	5	7	11	15	10	43	47	66	88	65	102	113	100	77	99	106	61	54	109	57	45	35	54	28	31	11	25	36	44	49	95	160	172	158	165	195	187
CH67	A1.14	000_bR 0.1% Tw80	144	142	147	165	157	112	141	152	146	151	105	117	114	110	79	112	135	146	151	157	130	156	177	159	165	153	136	152	138	158	154	106	138	87	96	99	85	103	107	122	151	157	194	230	200	174	218
CH70	B1.10	004_750ug CBD eq in extract	117	99	171	177	205	128	169	60	100	35	21	31	18	29	19	46	114	52	78	74	37	112	150	155	74	113	89	118	153	86	147	138	162	148	184	148	110	162	169	164	131	179	205	204	144	197	188
CH71	B1.11	004_750ug CBD eq in extract	18	11	76	8	14	14	14	23	23	11	9	15	31	14	32	17	38	52	22	56	43	52	61	60	32	60	50	24	38	81	73	77	78	107	109	101	88	116	99	94	77	85	103	81	92	87	131
CH72	B1.12	004_750ug CBD eq in extract	62	18	19	9	3	13	9	26	41	31	5	38	24	95	58	82	50	70	84	87	67	62	98	131	117	102	115	91	93	74	141	125	128	125	91	110	118	133	127	145	112	98	122	122	128	158	136
CH73	B1.13	004_750ug CBD eq in extract	143	134	138	102	118	98	92	131	104	141	152	160	166	177	132	139	156	179	143	177	197	202	214	185	157	154	170	185	202	223	189	180	186	199	173	211	206	198	177	210	200	184	200	169	186	163	176
CH76	C1.11	003_500ug CBD eq in extract	65	67	22	2	1	0	1	0	15	44	40	118	29	67	161	94	30	36	51	86	47	64	150	163	185	63	109	134	122	111	95	128	144	169	126	157	141	161	177	157	178	168	184	184	174	191	201
CH77	C1.12	003_500ug CBD eq in extract	51	120	35	7	12	4	8	22	10	7	15	50	19	13	16	64	27	52	39	74	21	38	59	47	60	66	59	119	93	95	87	141	128	159	144	149	160	168	176	171	156	192	158	191	163	146	151
CH78	C1.13	003_500ug CBD eq in extract	20	69	30	87	89	54	31	56	34	72	68	82	22	146	90	73	109	95	144	85	161	147	172	182	156	101	135	147	166	142	148	149	128	158	186	169	186	173	159	165	184	187	175	187	142	182	171
CH79	C1.14	003_500ug CBD eq in extract	88	70	96	160	160	139	150	153	150	157	129	191	186	192	218	214	178	173	177	175	211	198	198	203	191	185	180	192	180	188	183	160	161	195	173	156	177	166	174	178	168	159	162	146	151	134	132
CH81	A1.15	000_bR 0.1% Tw80	155	75	12	25	13	15	24	9	29	40	80	106	130	67	131	93	91	24	115	68	60	32	67	107	81	71	71	32	46	18	2	53	23	20	30	35	25	12	23	30	70	34	84	131	93	14	75
CH82	A1.16	000_bR 0.1% Tw80	153	57	69	53	51	22	50	51	196	205	211	206	235	212	233	245	239	257	240	248	239	231	188	178	189	173	232	221	224	238	229	246	240	176	195	214	192	213	244	212	197	225	240	234	233	232	204
CH87	B1.14	004_750ug CBD eq in extract	108	149	146	74	17	8	4	8	13	14	24	24	40	48	40	44	31	59	73	170	126	137	87	88	146	95	130	165	134	135	148	177	138	163	189	143	163	143	186	167	194	197	181	184	195	182	166
CH88	B1.15	004_750ug CBD eq in extract	76	54	68	170	136	72	54	95	142	137	173	159	174	170	133	101	137	136	104	125	188	137	108	131	128	124	165	153	166	196	158	105	164	187	179	183	201	186	215	205	191	188	205	206	220	198	203
CH93	C1.15	003_500ug CBD eq in extract	133	186	128	25	43	19	25	13	26	48	82	40	41	65	125	113	126	151	173	133	155	167	202	196	185	176	219	200	205	178	206	199	186	186	175	181	147	176	153	179	208	202	184	174	197	171	175
CH94	C1.16	003_500ug CBD eq in extract	68	74	36	51	33	27	27	38	44	48	58	75	109	95	95	81	68	86	114	161	136	139	136	150	130	138	139	152	133	122	126	123	133	133	131	139	128	110	127	130	138	125	129	129	108	138	118
CH113	A2.0	001_bR vehicle emulsion	135	129	177	35	1	0	0	0	0	0	0	0	0	11	34	69	70	131	153	181	102	79	109	153	132	139	133	129	81	66	59	42	85	83	164	164	179	185	182	167	192	191	180	236	214	198	186
CH114	A2.1	001_bR vehicle emulsion	44	34	37	11	53	89	31	29	36	36	9	24	17	60	68	78	64	81	122	132	154	179	152	154	167	113	147	108	96	88	48	79	72	76	76	119	142	172	209	227	224	235	236	218	260	242	220
CH115	A2.2	001_bR vehicle emulsion	52	55	60	89	64	123	50	31	53	66	87	67	75	85	101	118	113	160	170	148	126	142	157	146	143	175	193	159	183	151	173	136	119	91	101	140	168	190	193	221	212	215	227	203	190	197	202
CH118	B2.0	000_bR 0.1% Tw80	70	38	24	33	42	51	10	9	24	18	55	63	63	33	42	66	58	57	58	72	100	114	109	102	108	104	126	152	162	114	174	143	91	99	114	86	89	86	103	94	105	145	138	150	153	165	148
CH119	B2.1	000_bR 0.1% Tw80	45	13	37	49	30	37	39	7	12	7	21	11	6	14	30	16	20	45	37	57	93	83	143	104	133	131	128	82	89	57	56	76	116	189	162	137	150	113	194	164	184	209	188	182	167	187	206
CH120	B2.2	000_bR 0.1% Tw80	78	49	64	81	124	117	104	11	16	27	15	18	44	85	58	51	81	42	60	86	63	118	158	126	110	114	100	137	86	101	46	134	99	112	82	119	129	127	135	162	189	233	236	201	233	227	259
CH121	B2.3	000_bR 0.1% Tw80	139	176	170	105	82	64	104	101	80	112	110	105	85	53	60	61	102	108	117	126	156	146	152	114	113	131	159	166	155	150	158	101	126	104	145	161	151	148	185	145	154	165	167	150	168	150	146
CH124	C2.0	004_750ug CBD eq in extract	37	21	4	1	0	8	6	14	6	13	21	26	5	63	32	9	20	60	103	89	46	26	42	50	75	35	89	39	78	48	75	131	72	95	68	48	31	42	52	59	96	51	81	113	102	83	136
CH125	C2.1	004_750ug CBD eq in extract	13	19	7	20	51	9	0	21	2	23	18	12	16	18	35	62	48	45	41	40	20	11	25	26	37	46	32	58	44	43	16	29	49	27	42	14	26	21	16	73	29	38	32	47	31	48	45
CH126	C2.2	004_750ug CBD eq in extract	124	150	191	181	140	120	53	56	54	43	30	23	35	48	51	70	56	49	33	39	60	55	45	61	77	46	47	75	33	54	108	40	77	94	45	25	38	21	20	16	19	16	44	39	28	44	75
CH128	A2.3	001_bR vehicle emulsion	85	102	164	199	71	38	23	28	19	9	17	13	26	43	34	63	63	84	89	75	91	120	61	129	102	34	28	47	34	64	80	58	53	78	86	96	81	137	156	145	167	212	172	192	196	204	205
CH129	A2.4	001_bR vehicle emulsion	58	33	22	27	21	7	17	16	31	76	23	20	24	48	61	91	72	57	81	99	72	52	79	98	127	92	65	41	29	31	13	20	7	49	68	74	83	97	168	149	189	196	231	205	219	205	218
CH130	A2.5	001_bR vehicle emulsion	129	74	74	79	127	67	25	53	28	27	27	35	32	54	75	81	97	127	146	113	133	161	121	112	70	94	71	55	50	37	47	31	10	32	46	76	82	146	162	207	242	232	245	243	225	210	235
CH131	A2.6	001_bR vehicle emulsion	69	140	155	107	117	75	120	105	79	81	50	46	69	85	97	147	157	137	158	156	180	123	155	148	144	159	120	115	64	46	62	51	68	80	51	99	132	179	202	201	213	241	244	246	240	230	243
CH132	A2.7	001_bR vehicle emulsion	153	162	177	194	190	199	191	163	201	203	226	227	215	201	206	199	216	185	189	185	170	212	196	166	176	171	176	188	178	178	180	195	210	190	179	179	205	176	169	173	165	155	150	156	163	150	151
CH134	B2.4	000_bR 0.1% Tw80	78	27	23	30	45	40	49	22	45	149	18	16	10	14	17	19	24	43	39	69	95	91	99	89	98	121	94	110	115	95	127	65	82	69	119	70	97	56	77	52	70	128	106	122	166	154	156
CH135	B2.5	000_bR 0.1% Tw80	54	11	17	13	5	31	15	13	5	12	18	10	23	20	22	35	82	122	89	94	106	98	81	85	97	95	76	128	90	128	133	81	95	80	116	55	85	115	101	126	104	120	138	150	148	194	215
CH136	B2.6	000_bR 0.1% Tw80	55	44	27	21	30	33	22	11	9	26	30	2	13	42	23	22	39	52	83	87	110	117	136	101	122	92	85	131	114	102	158	105	172	155	152	155	135	206	209	248	238	227	202	206	230	234	204
CH137	B2.7	000_bR 0.1% Tw80	81	121	141	79	131	135	160	94	68	81	98	142	90	61	95	80	78	122	109	177	158	177	123	138	149	152	189	140	105	120	112	179	145	168	173	199	112	84	110	158	180	174	179	219	231	219	267
CH139	C2.3	004_750ug CBD eq in extract	129	84	29	11	34	6	7	0	4	24	33	55	55	36	47	31	73	70	47	66	38	36	64	49	85	73	106	61	52	56	84	137	112	112	105	78	69	69	57	68	99	67	53	73	108	112	104
CH140	C2.4	004_750ug CBD eq in extract	34	27	10	15	13	16	17	45	3	13	23	24	51	55	34	25	40	22	26	47	64	40	7	44	28	77	79	67	23	30	36	38	46	36	72	62	73	90	49	54	61	29	16	58	93	64	72
CH141	C2.5	004_750ug CBD eq in extract	25	26	5	8	6	30	11	26	33	32	42	80	28	12	17	50	39	27	27	12	34	31	20	17	31	39	59	50	64	65	33	31	36	83	47	88	36	41	58	59	36	54	53	58	55	75	125
CH142	C2.6	004_750ug CBD eq in extract	22	44	38	19	48	27	28	27	44	24	32	69	34	55	99	48	56	96	141	72	134	71	51	108	103	74	39	102	117	72	85	25	107	99	80	40	47	86	43	36	27	44	42	37	48	80	58
CH143	C2.7	004_750ug CBD eq in extract	64	75	64	51	93	99	122	117	127	82	142	174	124	140	169	176	113	163	152	140	98	171	142	128	148	86	156	168	76	88	139	198	51	116	82	128	54	58	114	159	142	85	120	67	95	97	75
CH144	A2.8	001_bR vehicle emulsion	40	62	163	130	24	15	8	2	15	9	11	30	49	71	90	106	126	114	119	129	142	146	143	138	188	134	170	167	173	158	153	179	180	173	153	197	193	203	195	183	214	183	187	208	213	204	194
CH145	A2.9	001_bR vehicle emulsion	74	31	31	15	7	10	9	8	16	19	24	47	45	56	55	76	89	107	99	114	96	176	85	51	72	46	58	98	85	28	15	12	2	16	26	44	81	88	141	176	170	180	206	219	206	196	195
CH146	A2.10	001_bR vehicle emulsion	51	116	56	19	57	47	50	28	26	31	44	71	99	85	76	116	120	145	155	163	150	150	106	84	104	80	72	33	34	53	48	12	12	45	37	44	84	148	185	184	194	210	255	209	213	214	235
CH147	A2.11	001_bR vehicle emulsion	66	71	118	57	82	133	102	125	160	121	105	105	96	156	184	174	168	178	180	181	196	181	168	177	172	169	161	118	107	56	86	59	57	46	68	88	126	177	193	221	210	232	238	232	261	228	221
CH148	A2.12	001_bR vehicle emulsion	157	186	160	203	208	207	194	199	191	210	180	201	190	192	194	189	172	169	183	163	153	159	163	158	168	188	169	167	176	187	193	186	184	168	175	185	186	188	178	176	177	182	172	168	169	165	164
CH150	B2.8	000_bR 0.1% Tw80	70	30	27	49	21	48	9	24	42	125	53	30	29	40	84	93	155	127	142	120	111	129	123	151	120	148	146	117	112	61	83	66	64	37	94	54	63	94	96	108	116	146	108	125	170	211	183
CH151	B2.9	000_bR 0.1% Tw80	77	21	33	20	17	18	22	10	14	8	11	24	58	11	27	24	35	42	51	68	124	94	108	95	105	137	130	89	68	95	122	116	46	34	67	50	14	39	41	62	85	116	192	164	224	185	229
CH152	B2.10	000_bR 0.1% Tw80	94	38	35	37	66	32	12	24	17	13	19	9	9	27	37	32	49	60	85	124	149	136	138	132	124	121	131	114	111	115	92	98	140	112	81	61	41	67	69	111	134	136	212	196	205	210	226
CH153	B2.11	000_bR 0.1% Tw80	74	81	133	86	79	97	144	180	130	151	133	166	143	123	143	140	135	194	177	172	189	155	134	163	157	121	147	156	180	126	104	132	121	93	88	98	84	87	132	162	151	208	211	224	258	245	256
CH155	C2.8	004_750ug CBD eq in extract	53	145	158	126	117	46	21	21	19	9	30	27	32	33	20	18	37	45	43	51	95	37	41	60	92	71	66	80	73	80	120	74	78	124	131	79	149	85	98	96	97	123	142	115	129	145	154
CH156	C2.9	004_750ug CBD eq in extract	37	25	10	9	5	10	9	14	7	16	8	5	7	35	0	69	74	72	57	36	49	44	56	53	31	46	49	53	59	47	101	63	59	43	57	134	106	100	102	50	80	56	115	154	64	88	117
CH157	C2.10	004_750ug CBD eq in extract	82	31	11	4	6	7	17	13	21	19	8	4	3	12	15	19	88	38	26	19	26	35	46	28	45	60	50	38	24	51	85	64	64	52	86	83	131	99	116	92	107	84	83	62	47	98	115
CH158	C2.11	004_750ug CBD eq in extract	13	34	18	59	67	146	102	94	12	22	21	24	18	54	129	114	37	111	109	54	56	106	174	143	209	126	81	87	144	106	73	58	74	117	86	124	126	43	144	62	60	87	123	164	153	117	108
CH159	C2.12	004_750ug CBD eq in extract	62	52	46	69	123	99	77	101	147	139	100	100	108	139	177	199	123	179	150	163	164	164	111	112	114	124	65	70	114	120	106	104	84	117	121	106	69	83	166	121	113	141	139	90	99	91	157
CH160	A2.13	001_bR vehicle emulsion	172	96	61	11	15	21	3	14	12	18	17	1	0	0	0	0	0	109	182	157	168	180	210	179	149	162	177	165	201	157	190	186	165	199	199	207	183	181	168	159	161	157	172	154	164	157	159
CH161	A2.14	001_bR vehicle emulsion	92	111	132	56	18	14	25	65	35	134	79	43	37	57	58	92	135	157	172	167	144	134	142	136	124	155	150	173	124	136	65	67	128	46	86	93	138	145	165	169	183	187	176	180	158	186	191
CH162	A2.15	001_bR vehicle emulsion	89	50	62	90	101	66	56	51	108	88	57	84	81	120	143	149	149	179	177	161	189	145	192	197	140	149	190	144	126	152	100	38	33	55	73	45	109	196	191	210	223	236	229	219	216	224	235
CH163	A2.16	001_bR vehicle emulsion	56	55	126	126	177	162	196	152	113	139	175	159	173	218	206	209	213	213	202	175	174	167	162	181	181	183	183	127	128	129	105	81	74	90	159	144	179	172	201	254	244	248	231	228	214	218	223
CH166	B2.12	000_bR 0.1% Tw80	98	141	141	112	40	68	33	44	53	13	24	40	33	54	49	74	76	71	109	134	132	169	164	169	165	142	130	138	139	143	138	134	159	152	125	135	154	102	189	180	166	173	167	189	153	169	159
CH167	B2.13	000_bR 0.1% Tw80	86	46	63	53	137	113	81	31	86	25	56	101	63	138	191	214	208	150	163	177	181	158	170	136	154	164	154	161	167	168	153	170	180	190	188	170	175	174	166	171	143	168	145	159	151	150	171
CH168	B2.14	000_bR 0.1% Tw80	54	35	50	64	75	53	22	65	67	119	82	25	57	44	34	66	112	124	120	165	160	178	159	177	178	177	215	121	177	230	166	167	133	150	148	137	174	181	123	138	134	164	192	175	210	192	218
CH169	B2.15	000_bR 0.1% Tw80	140	179	162	170	138	193	192	215	216	199	206	187	186	209	224	207	216	209	204	190	211	177	185	169	178	170	176	170	186	187	164	143	154	149	167	201	171	164	172	174	182	197	180	188	192	167	168
CH172	C2.13	004_750ug CBD eq in extract	152	53	13	11	5	9	7	14	13	45	114	52	10	33	14	19	18	33	42	40	51	61	64	44	59	51	109	94	59	47	56	47	50	72	103	93	117	190	161	171	125	136	185	162	134	132	179
CH173	C2.14	004_750ug CBD eq in extract	123	95	172	159	197	225	164	111	57	57	19	38	51	70	59	120	79	32	44	53	42	66	52	74	97	84	177	95	140	146	102	117	148	164	155	75	160	199	222	188	159	211	194	202	235	189	191
CH174	C2.15	004_750ug CBD eq in extract	82	74	117	183	181	203	218	226	220	222	220	210	176	113	83	56	92	119	55	77	64	119	119	122	121	205	128	134	127	141	143	200	160	123	111	89	136	105	160	118	105	126	167	120	124	144	148
CH175	C2.16	004_750ug CBD eq in extract	84	59	63	104	70	68	79	118	77	109	77	118	92	148	173	161	179	139	162	145	151	129	139	130	202	192	171	159	180	174	182	202	201	191	192	180	193	197	227	184	211	227	204	217	207	208	208
CH208	A3.0	002_300ug CBD eq in extract	97	57	57	21	45	9	0	2	0	0	0	0	0	0	0	0	0	67	29	55	73	112	39	28	38	34	33	22	39	8	25	36	46	35	28	16	8	12	18	10	8	27	33	10	15	4	43
CH209	A3.1	002_300ug CBD eq in extract	75	52	36	25	43	86	50	45	22	23	4	18	23	8	30	11	3	15	11	34	49	60	52	41	43	41	69	117	89	169	169	99	142	66	57	56	83	71	82	80	53	75	112	84	91	136	120
CH210	A3.2	002_300ug CBD eq in extract	69	72	48	62	52	43	62	51	47	38	47	23	49	24	28	25	31	21	15	25	35	39	75	61	73	75	78	108	93	148	116	125	138	149	128	106	73	114	70	106	103	54	63	68	76	114	137
CH211	A3.3	002_300ug CBD eq in extract	46	121	116	57	128	131	165	125	168	67	85	63	89	122	107	171	193	132	131	126	136	91	150	119	153	208	172	177	186	182	161	156	155	209	163	171	142	171	170	166	142	140	144	132	154	151	147
CH214	B3.0	001_bR vehicle emulsion	91	58	56	33	11	10	56	135	51	90	131	49	27	42	66	120	133	138	137	103	165	157	177	164	157	172	161	178	94	113	86	133	103	122	89	146	176	139	181	166	171	195	187	187	191	194	191
CH215	B3.1	001_bR vehicle emulsion	80	37	19	43	11	25	18	28	16	18	12	27	14	32	54	56	96	114	90	109	128	151	86	97	75	101	95	102	46	81	86	57	97	146	110	175	166	174	164	182	187	187	186	172	195	189	214
CH216	B3.2	001_bR vehicle emulsion	50	59	57	67	11	22	27	16	25	10	8	32	28	59	76	85	70	105	156	93	108	164	125	148	148	128	116	139	148	111	108	176	175	160	148	173	171	204	229	248	274	241	243	249	241	229	231
CH217	B3.3	001_bR vehicle emulsion	82	63	172	58	55	168	93	92	46	114	49	59	51	113	112	123	163	156	188	131	143	156	161	157	135	133	112	185	126	104	138	131	99	79	172	200	178	223	191	219	210	226	240	252	253	275	284
CH220	C3.0	000_bR 0.1% Tw80	37	24	44	27	14	103	126	91	14	36	13	19	2	3	13	43	18	27	23	77	29	71	67	52	91	90	102	53	33	53	59	70	40	30	29	12	31	119	109	145	146	172	191	208	169	174	196
CH221	C3.1	000_bR 0.1% Tw80	47	104	203	106	43	13	3	6	10	8	15	9	4	2	4	10	9	24	42	29	42	53	55	57	57	79	90	60	61	80	99	172	163	162	102	63	46	70	61	133	141	189	164	180	213	263	252
CH222	C3.2	000_bR 0.1% Tw80	46	66	102	108	43	19	52	25	25	17	6	17	2	0	14	12	24	16	29	26	43	67	94	89	60	88	104	77	116	141	154	202	125	78	80	61	48	51	52	98	139	103	149	156	176	186	217
CH223	C3.3	000_bR 0.1% Tw80	100	97	101	86	81	62	56	59	23	45	29	60	25	34	23	29	38	37	46	38	74	119	103	105	88	110	150	105	133	81	123	75	54	82	74	68	53	48	69	72	102	108	111	142	189	157	209
CH224	A3.4	002_300ug CBD eq in extract	81	87	95	158	117	32	35	35	26	13	18	45	23	11	6	6	19	22	22	15	16	31	27	35	75	63	36	61	125	57	43	38	52	54	48	82	40	55	52	68	187	45	53	82	70	73	75
CH225	A3.5	002_300ug CBD eq in extract	68	47	77	37	69	46	61	20	27	49	25	22	12	10	17	23	7	19	14	20	18	46	43	41	59	62	58	85	64	54	54	86	67	73	38	68	78	41	49	52	21	30	65	77	131	72	112
CH226	A3.6	002_300ug CBD eq in extract	56	34	49	36	24	30	38	37	37	59	30	23	7	13	43	24	16	18	35	19	21	31	61	44	57	71	99	75	80	76	82	89	75	60	73	48	54	49	38	37	38	48	32	37	61	127	78
CH227	A3.7	002_300ug CBD eq in extract	74	47	41	109	64	93	118	78	111	104	95	139	87	101	76	34	119	95	70	83	63	121	122	115	127	148	144	167	130	176	187	161	137	169	159	171	131	121	103	119	113	139	117	108	85	101	109
CH228	A3.8	002_300ug CBD eq in extract	142	147	137	167	183	171	179	163	190	229	201	194	210	197	193	203	210	201	187	206	179	192	199	211	198	189	176	176	184	176	197	189	187	180	194	177	167	174	188	176	170	223	196	178	200	222	191
CH230	B3.4	001_bR vehicle emulsion	194	160	52	27	41	62	49	26	18	7	15	19	45	56	64	76	106	137	127	118	136	123	169	113	130	143	204	114	128	114	115	73	47	39	79	108	122	146	158	154	161	180	171	180	165	188	160
CH231	B3.5	001_bR vehicle emulsion	53	21	43	16	25	8	5	8	6	19	11	13	24	23	61	72	67	92	90	92	132	97	97	89	119	65	107	112	77	59	17	41	20	68	43	46	80	92	165	173	161	194	191	168	219	188	207
CH232	B3.6	001_bR vehicle emulsion	48	36	36	29	15	15	12	43	13	28	41	21	26	43	66	59	84	127	126	107	126	147	96	88	104	76	81	97	81	75	116	86	70	98	79	111	71	144	162	169	171	196	184	242	208	187	208
CH233	B3.7	001_bR vehicle emulsion	67	39	124	89	107	102	101	108	111	136	138	158	138	139	131	174	140	152	178	163	181	184	159	120	188	183	203	172	69	106	110	87	91	78	134	148	172	192	218	230	235	240	269	248	257	251	253
CH235	C3.4	000_bR 0.1% Tw80	101	143	183	58	16	36	47	55	51	73	80	77	83	26	68	20	49	41	64	36	61	89	88	144	147	136	140	197	170	121	179	137	156	151	111	113	132	122	91	69	97	109	92	126	133	153	191
CH236	C3.5	000_bR 0.1% Tw80	38	10	9	17	33	34	12	8	7	60	12	20	25	14	8	11	19	44	102	68	62	82	67	72	84	101	124	69	91	118	120	97	66	70	88	43	43	66	46	68	110	137	152	131	212	204	174
CH237	C3.6	000_bR 0.1% Tw80	84	24	22	40	33	8	14	2	9	6	8	6	7	3	10	12	19	50	40	56	79	127	85	68	96	82	61	93	70	162	138	120	24	91	82	112	62	27	29	56	40	95	111	168	189	191	195
CH238	C3.7	000_bR 0.1% Tw80	41	40	43	49	54	127	124	47	46	75	69	39	5	8	22	35	20	36	65	48	55	83	53	122	101	65	105	141	122	95	150	171	165	137	116	122	140	122	192	133	144	121	130	206	180	184	186
CH239	C3.8	000_bR 0.1% Tw80	71	82	100	112	121	157	147	143	120	107	112	79	55	68	74	61	57	80	86	97	100	98	151	141	148	156	146	119	89	133	99	118	169	133	82	86	99	100	116	125	150	189	203	213	204	228	193
CH240	A3.9	002_300ug CBD eq in extract	112	93	41	84	33	50	84	41	62	42	71	10	3	71	36	24	15	12	28	20	15	37	54	17	48	45	89	93	114	105	103	112	97	94	158	158	173	201	184	158	175	130	179	205	192	153	172
CH241	A3.10	002_300ug CBD eq in extract	60	50	34	22	22	98	133	73	63	48	89	22	16	18	15	8	5	24	42	20	35	72	46	51	67	78	52	107	93	61	75	71	71	51	43	93	64	49	27	87	18	38	36	38	73	85	99
CH242	A3.11	002_300ug CBD eq in extract	123	45	46	55	63	89	116	37	128	67	56	34	73	83	30	8	39	31	40	38	51	88	65	62	80	91	110	129	128	119	137	134	105	139	126	65	42	56	45	111	51	66	35	57	57	54	74
CH243	A3.12	002_300ug CBD eq in extract	87	76	62	89	102	65	95	132	135	100	126	87	120	127	168	94	114	135	118	96	134	132	150	151	169	173	186	159	151	155	175	172	176	149	168	170	172	143	168	145	127	111	110	118	138	128	126
CH244	A3.13	002_300ug CBD eq in extract	141	174	171	206	191	221	194	226	214	226	239	211	205	212	212	227	228	235	214	226	211	195	205	211	205	190	187	185	179	183	172	208	187	163	179	179	186	196	192	210	188	180	181	188	186	172	166
CH246	B3.8	001_bR vehicle emulsion	123	80	71	8	22	13	37	75	34	33	48	87	51	53	77	82	119	143	152	146	142	116	132	114	139	203	176	85	150	157	124	143	111	154	120	115	164	172	175	173	170	157	160	157	167	144	166
CH247	B3.9	001_bR vehicle emulsion	56	48	30	48	23	48	9	16	9	35	26	31	40	52	63	83	98	122	69	106	136	107	132	117	74	139	105	140	84	71	123	87	76	79	44	67	95	118	121	125	170	168	166	190	162	155	204
CH248	B3.10	001_bR vehicle emulsion	101	77	58	37	84	57	57	41	118	38	66	40	59	98	110	127	123	133	148	149	139	179	179	206	154	142	153	134	127	105	139	83	115	110	101	136	160	136	164	175	231	214	235	227	235	241	237
CH249	B3.11	001_bR vehicle emulsion	84	66	152	68	127	143	135	115	84	116	125	108	163	169	180	184	177	176	175	188	152	147	204	174	136	175	187	155	147	166	79	110	105	115	160	115	148	168	176	196	212	209	233	260	246	245	230
CH251	C3.9	000_bR 0.1% Tw80	36	22	12	22	18	34	26	13	13	10	21	19	11	31	38	23	45	64	64	93	79	105	104	119	129	96	106	128	111	106	118	77	69	51	61	59	94	98	103	76	99	97	95	106	95	113	135
CH252	C3.10	000_bR 0.1% Tw80	36	14	27	15	11	9	4	6	15	8	6	15	8	27	55	44	54	41	42	88	95	96	128	104	108	135	104	157	130	136	93	96	178	224	199	114	131	158	103	119	135	175	231	197	171	187	205
CH253	C3.11	000_bR 0.1% Tw80	44	22	52	27	14	8	11	18	18	9	17	8	14	12	9	33	68	54	61	69	53	65	63	81	92	92	163	97	76	113	104	80	71	57	42	68	90	105	55	106	97	109	139	103	169	160	170
CH254	C3.12	000_bR 0.1% Tw80	62	59	124	187	123	92	108	106	90	65	87	114	149	146	166	131	123	138	112	130	130	131	86	128	125	98	101	110	80	101	123	99	107	106	114	74	109	59	120	113	161	154	169	171	192	188	228
CH255	C3.13	000_bR 0.1% Tw80	135	104	179	204	213	189	180	175	214	200	205	218	211	217	205	192	212	191	157	156	159	175	142	134	145	137	108	96	136	87	102	83	96	108	164	119	100	69	90	109	122	142	163	155	146	168	198
CH257	A3.14	002_300ug CBD eq in extract	109	167	177	81	62	68	65	52	34	16	21	51	65	70	96	52	71	66	111	68	130	86	72	100	111	115	158	145	149	168	169	165	169	147	168	157	158	137	180	170	165	168	144	146	193	188	179
CH258	A3.15	002_300ug CBD eq in extract	89	120	136	104	144	146	150	102	131	129	145	151	206	175	168	211	195	197	190	181	151	144	122	155	177	163	148	172	179	148	172	164	152	178	161	171	138	149	133	152	127	129	156	180	188	146	171
CH259	A3.16	002_300ug CBD eq in extract	101	77	126	147	149	146	174	154	114	129	136	114	152	163	148	98	165	151	176	213	190	217	198	230	220	207	181	189	215	203	206	227	213	190	207	209	185	190	188	192	173	204	152	184	201	215	204
CH262	B3.12	001_bR vehicle emulsion	114	96	46	34	38	56	34	36	39	17	18	45	61	79	86	108	135	144	135	115	150	155	140	106	125	102	139	111	131	145	126	133	128	100	117	123	150	135	155	145	157	141	152	169	147	165	167
CH263	B3.13	001_bR vehicle emulsion	39	31	50	37	47	36	47	57	28	52	27	43	42	53	72	69	111	147	101	133	113	110	102	146	172	189	168	200	113	74	61	77	164	176	157	216	216	202	183	177	179	195	187	179	161	189	168
CH264	B3.14	001_bR vehicle emulsion	58	40	70	93	141	111	123	127	70	60	96	87	92	120	152	125	152	158	160	177	138	137	169	106	125	141	156	108	74	76	132	87	96	125	124	178	191	184	199	197	200	169	188	189	158	166	195
CH265	B3.15	001_bR vehicle emulsion	78	146	146	154	171	214	215	184	146	151	192	191	191	184	218	231	231	198	216	200	169	165	143	152	181	132	161	227	157	120	181	203	216	232	239	272	258	229	225	241	243	234	260	268	257	264	245
CH268	C3.14	000_bR 0.1% Tw80	59	76	58	48	77	59	58	35	46	44	25	45	52	30	48	77	72	66	129	120	106	108	98	146	139	152	132	131	137	153	134	126	143	118	132	143	150	140	131	150	140	146	158	131	138	155	145
CH269	C3.15	000_bR 0.1% Tw80	96	129	148	155	157	41	54	29	98	6	12	11	13	19	28	39	46	94	121	156	159	159	140	127	140	147	140	142	128	99	122	134	102	100	121	126	142	169	155	191	167	148	153	170	187	166	166
CH270	C3.16	000_bR 0.1% Tw80	115	167	175	137	90	111	105	93	150	160	174	109	154	131	120	150	185	177	181	192	182	208	178	169	183	180	180	172	146	132	161	164	163	132	83	81	78	107	126	149	154	172	192	179	179	177	195
CH289	A4.0	003_500ug CBD eq in extract	111	146	66	27	30	27	9	94	124	41	53	57	75	80	64	37	68	94	31	122	53	79	137	167	95	159	135	121	108	156	110	89	129	143	140	173	151	128	143	174	165	148	168	184	169	195	185
CH290	A4.1	003_500ug CBD eq in extract	68	146	111	41	71	137	34	49	78	53	57	58	49	75	42	91	145	161	98	140	155	132	84	122	100	85	44	103	112	89	126	167	151	149	178	215	200	209	185	188	190	183	180	198	195	179	173
CH295	B4.0	002_300ug CBD eq in extract	129	109	67	22	35	41	61	68	69	72	131	145	125	48	45	57	75	98	46	73	76	78	136	205	96	149	159	143	172	161	141	123	152	135	155	156	180	155	181	174	159	176	178	167	173	189	199
CH296	B4.1	002_300ug CBD eq in extract	113	130	131	122	215	157	96	101	58	62	80	46	137	155	134	61	107	167	176	138	145	167	138	131	143	159	162	134	134	154	123	135	144	157	133	166	175	173	169	175	179	152	172	175	164	173	168
CH301	C4.0	001_bR vehicle emulsion	157	174	163	23	20	24	31	4	10	7	11	26	56	18	36	36	38	76	109	92	122	124	96	117	144	82	45	40	106	153	96	156	142	111	98	143	134	91	165	232	178	205	180	175	197	202	203
CH302	C4.1	001_bR vehicle emulsion	103	65	136	80	24	10	44	69	23	14	13	17	42	45	60	64	98	120	145	150	176	116	170	142	110	140	86	102	186	120	173	205	153	190	203	210	166	188	190	138	161	177	175	138	159	186	197
CH304	A4.2	003_500ug CBD eq in extract	63	94	74	32	68	90	91	42	34	38	24	72	100	32	53	106	155	147	104	51	108	53	49	83	139	164	142	152	172	185	107	98	104	109	135	163	149	138	126	180	142	201	191	211	190	181	205
CH305	A4.3	003_500ug CBD eq in extract	69	38	40	33	24	32	30	68	34	22	25	33	18	64	15	42	6	5	18	44	9	28	14	25	9	13	60	20	28	29	30	39	44	79	76	48	54	107	66	88	78	85	79	68	46	63	46
CH306	A4.4	003_500ug CBD eq in extract	31	59	46	27	29	39	32	15	36	57	47	69	51	81	27	26	26	19	19	27	27	18	6	15	9	34	41	11	40	42	52	68	84	89	101	103	108	88	91	107	88	70	84	97	73	68	68
CH307	A4.5	003_500ug CBD eq in extract	43	54	147	106	145	101	84	98	89	125	84	96	144	93	130	94	129	142	138	182	176	158	145	170	174	138	132	126	158	143	174	181	165	185	194	155	191	170	199	176	162	164	123	168	132	168	151
CH310	B4.2	002_300ug CBD eq in extract	61	41	55	62	37	24	13	21	34	14	30	8	35	30	51	5	5	46	107	81	43	41	31	93	134	95	61	110	126	156	100	89	100	153	151	156	182	174	192	150	149	175	125	177	181	172	187
CH311	B4.3	002_300ug CBD eq in extract	180	38	28	35	44	20	54	18	17	47	36	47	28	23	13	7	21	32	26	24	26	34	55	80	123	70	92	89	91	132	103	154	166	143	157	174	137	146	170	119	134	113	163	103	157	183	173
CH312	B4.4	002_300ug CBD eq in extract	36	51	36	8	22	36	31	100	45	17	90	22	48	60	102	39	45	50	95	73	56	83	92	99	122	117	110	130	124	160	133	151	166	160	147	152	171	172	177	157	107	124	149	141	141	150	142
CH313	B4.5	002_300ug CBD eq in extract	57	70	135	187	126	162	110	112	50	114	79	77	95	145	157	115	102	82	117	96	138	166	137	166	135	171	141	173	159	179	177	187	207	190	172	160	164	178	143	165	139	143	176	162	159	156	165
CH316	C4.2	001_bR vehicle emulsion	102	26	44	17	2	0	0	0	1	12	4	9	29	10	19	13	31	51	54	53	69	92	105	147	187	96	99	85	104	85	110	151	117	121	127	159	216	217	282	280	293	272	256	245	234	247	238
CH317	C4.3	001_bR vehicle emulsion	62	17	27	14	5	7	4	31	7	24	28	24	22	33	53	55	75	37	54	88	98	127	105	87	117	63	125	180	107	174	176	123	168	83	79	108	140	175	156	134	168	183	222	212	220	205	217
CH318	C4.4	001_bR vehicle emulsion	62	67	33	10	21	26	18	41	64	80	74	41	43	89	90	80	98	134	98	86	127	119	143	150	142	105	109	87	74	108	134	122	93	83	109	120	92	124	105	98	137	154	172	198	175	194	195
CH319	C4.5	001_bR vehicle emulsion	70	43	87	95	100	138	160	187	187	202	183	179	173	171	155	147	184	182	176	152	131	175	145	153	174	209	163	149	213	203	142	123	108	65	99	129	134	174	190	185	213	182	206	154	150	188	228
CH320	A4.6	003_500ug CBD eq in extract	113	44	46	34	8	10	22	22	37	26	52	58	42	7	12	13	4	9	2	6	17	17	38	10	5	2	9	20	25	16	8	68	23	59	62	39	36	63	55	101	86	95	62	91	121	48	57
CH321	A4.7	003_500ug CBD eq in extract	40	34	46	20	20	22	21	72	58	31	34	30	25	22	11	5	0	9	12	19	14	10	7	5	3	7	30	23	32	29	44	51	67	84	38	55	45	46	44	55	55	29	37	50	71	59	36
CH322	A4.8	003_500ug CBD eq in extract	83	150	61	58	66	64	56	71	86	50	61	41	74	48	28	34	10	7	1	15	37	39	12	12	31	16	20	24	36	35	80	66	73	60	100	91	80	107	84	99	85	84	55	83	96	67	30
CH323	A4.9	003_500ug CBD eq in extract	38	49	96	62	72	69	80	98	143	142	101	76	76	106	102	70	72	87	79	56	48	54	17	43	36	37	37	69	93	83	119	130	119	145	135	155	140	150	145	154	140	104	106	112	131	76	87
CH324	A4.10	003_500ug CBD eq in extract	171	150	151	185	195	206	218	219	201	210	226	217	206	229	216	218	227	221	207	210	228	226	204	205	222	213	193	210	202	193	193	187	171	170	188	170	192	185	179	200	187	183	176	195	183	179	180
CH326	B4.6	002_300ug CBD eq in extract	96	37	86	134	110	69	129	181	187	154	146	83	48	30	32	24	26	48	74	122	61	112	70	66	87	74	75	49	105	136	134	134	91	61	163	122	95	115	124	97	56	69	65	74	91	66	143
CH327	B4.7	002_300ug CBD eq in extract	28	53	35	58	40	58	53	25	20	21	36	45	26	32	45	26	14	28	30	24	24	32	90	65	34	77	87	59	85	80	98	77	107	124	81	71	110	73	118	162	72	144	142	100	59	69	85
CH328	B4.8	002_300ug CBD eq in extract	50	47	40	46	35	11	20	60	71	39	38	20	28	25	12	19	36	11	26	29	44	64	64	75	80	100	103	130	111	131	93	107	116	120	81	67	78	95	120	92	62	43	44	51	73	48	59
CH329	B4.9	002_300ug CBD eq in extract	55	119	124	116	147	117	125	168	165	117	106	159	129	163	145	128	148	152	173	130	166	141	158	134	187	199	193	149	176	149	166	183	157	186	176	152	174	156	160	145	128	110	166	88	102	108	140
CH331	C4.6	001_bR vehicle emulsion	22	22	30	11	7	8	2	8	7	7	6	21	37	31	65	90	93	108	97	126	152	190	150	160	152	159	135	153	193	192	161	166	144	109	118	152	144	142	164	183	195	186	180	210	194	206	191
CH332	C4.7	001_bR vehicle emulsion	42	25	20	8	3	7	1	2	2	2	8	4	3	14	29	30	35	68	26	64	74	95	61	111	94	69	82	134	146	112	143	121	97	91	135	167	154	115	144	156	144	153	169	173	213	200	179
CH333	C4.8	001_bR vehicle emulsion	15	25	28	36	9	6	6	17	6	9	11	11	31	20	58	32	61	59	63	81	100	101	54	91	87	147	95	69	103	182	74	74	96	158	87	54	82	63	113	126	154	139	153	160	148	150	159
CH334	C4.9	001_bR vehicle emulsion	36	46	40	36	31	25	18	17	8	15	63	90	44	59	60	48	84	128	109	77	98	117	75	105	95	123	60	42	71	44	19	29	17	31	15	32	69	60	45	90	116	126	148	168	163	118	177
CH335	C4.10	001_bR vehicle emulsion	120	159	131	168	137	186	178	123	124	107	127	146	170	220	243	246	247	261	244	229	196	190	165	136	148	143	99	132	92	122	89	78	114	104	61	93	95	119	113	166	185	150	193	169	167	209	212
CH336	A4.11	003_500ug CBD eq in extract	61	58	50	45	43	58	60	44	87	57	66	41	79	35	24	30	29	46	19	15	32	7	7	15	26	20	22	16	14	23	51	48	34	61	25	67	60	96	90	118	62	93	96	70	94	120	95
CH337	A4.12	003_500ug CBD eq in extract	40	42	38	41	113	101	28	15	43	38	20	45	34	38	9	9	11	33	1	13	7	36	24	16	7	20	11	3	20	35	34	57	69	42	30	40	52	88	51	55	49	29	82	39	65	96	69
CH338	A4.13	003_500ug CBD eq in extract	43	55	53	48	43	35	71	28	66	36	47	32	33	11	26	49	17	23	46	21	7	9	5	15	20	18	16	21	28	32	65	44	76	82	67	72	73	45	73	71	83	56	80	55	67	41	55
CH339	A4.14	003_500ug CBD eq in extract	28	56	123	162	106	77	138	92	84	103	103	95	84	86	80	87	119	112	85	58	44	67	56	59	91	47	49	95	104	138	138	131	170	150	196	186	160	155	158	195	190	179	132	174	140	131	102
CH342	B4.10	002_300ug CBD eq in extract	53	56	85	126	149	76	8	62	52	61	57	85	136	34	57	18	24	13	22	15	27	31	45	52	50	77	80	84	100	98	115	108	88	91	85	87	68	125	163	133	124	129	121	143	109	97	104
CH343	B4.11	002_300ug CBD eq in extract	49	56	48	27	16	75	79	82	73	22	39	17	22	35	19	35	28	30	23	51	34	19	35	56	57	108	78	75	88	76	91	94	72	64	82	66	93	100	50	77	73	104	84	50	66	113	138
CH344	B4.12	002_300ug CBD eq in extract	47	82	112	102	71	52	149	64	61	55	76	78	35	34	26	40	65	34	62	51	40	51	56	79	86	89	106	98	128	85	93	93	125	104	105	104	117	84	111	83	84	43	136	57	43	53	71
CH345	B4.13	002_300ug CBD eq in extract	66	166	117	119	143	134	128	106	146	138	68	125	108	85	142	139	89	132	125	140	117	129	128	126	113	136	141	137	169	145	160	143	160	141	131	98	141	123	165	152	190	166	132	138	102	128	159
CH348	C4.11	001_bR vehicle emulsion	118	56	47	35	36	47	15	7	14	39	51	24	35	39	58	68	61	109	150	79	91	145	174	138	86	131	95	209	151	103	52	118	146	45	53	37	44	75	106	133	145	168	164	177	199	187	170
CH349	C4.12	001_bR vehicle emulsion	40	54	35	34	10	50	8	6	16	5	12	9	17	39	39	27	52	38	67	58	63	56	83	81	131	51	70	21	80	75	42	38	74	54	55	48	64	77	100	104	107	97	161	165	195	144	196
CH350	C4.13	001_bR vehicle emulsion	48	33	66	38	72	126	51	26	35	19	10	26	24	43	45	54	43	75	76	66	86	96	65	82	56	54	51	36	93	103	81	64	21	48	18	39	19	54	51	109	102	100	137	147	144	164	189
CH351	C4.14	001_bR vehicle emulsion	106	129	168	184	126	130	91	150	128	123	116	72	141	115	137	125	137	184	174	178	183	160	154	152	140	130	142	136	108	103	44	79	72	60	82	72	141	99	119	124	149	193	163	199	196	206	236
CH353	A4.15	003_500ug CBD eq in extract	158	68	111	55	33	29	50	26	35	55	33	24	37	18	24	80	25	38	27	22	18	17	18	32	7	22	85	27	59	32	31	56	95	81	108	105	158	154	162	142	162	169	183	144	166	144	165
CH354	A4.16	003_500ug CBD eq in extract	119	122	78	77	67	83	54	92	73	101	101	114	33	52	76	89	103	48	91	58	107	43	114	42	30	30	48	38	98	124	146	107	139	126	148	167	173	161	175	188	192	180	179	176	186	170	169
CH359	B4.14	002_300ug CBD eq in extract	84	128	114	48	41	102	132	171	56	53	75	53	53	22	21	28	118	79	51	27	33	68	57	56	78	117	123	129	96	99	163	155	130	138	93	122	86	62	87	84	145	146	90	97	68	130	162
CH360	B4.15	002_300ug CBD eq in extract	143	168	122	56	81	116	69	139	174	143	160	101	90	152	125	88	126	99	168	174	140	119	181	158	154	133	151	155	159	157	153	170	155	139	169	149	149	172	154	153	175	166	105	148	155	148	164
CH365	C4.15	001_bR vehicle emulsion	65	50	84	120	58	90	65	43	147	150	43	71	22	16	34	42	61	71	59	51	89	59	68	56	66	58	44	49	23	96	53	35	23	32	83	28	42	57	86	104	130	144	119	122	132	140	125
CH366	C4.16	001_bR vehicle emulsion	78	109	116	174	172	125	46	17	20	23	49	87	96	52	64	71	52	97	89	137	92	68	71	57	44	92	147	141	96	117	87	56	129	46	89	38	92	42	84	95	98	146	152	140	155	171	162
[truncated: 96 more columns]

## Sheet: wDAT ex2 tL
DATE:	2023-11-10 15:14:00
FILE:	C:\Software\WMicrotracker One\wmicrotracker_w8_v30api\wmicrotracker\p00031\20231107_1841
SUBPROJECT:	2023 1107-10 wDAT CBD300-750 TwVCe ex2 tL
<<<<<< Group Activity: Average Activity Counts per Data Interval>>>>>>
Group/Time[m]	30	60	90	120	150	180	210	240	270	300	330	360	390	420	450	480	510	540	570	600	630	660	690	720	750	780	810	840	870	900	930	960	990	1020	1050	1080	1110	1140	1170	1200	1230	1260	1290	1320	1350	1380	1410	1440	1470
0.1% Tw80	56	62	66	76	80	81	80	82	83	81	75	76	71	67	60	58	50	47	38	35	29	30	28	32	21	19	22	19	14	15	20	16	16	10	7	10	11	13	16	18	20	23	29	32	35	38	37	35	34
vehicle emulsion	50	62	66	75	79	80	86	90	85	80	76	72	66	60	58	50	43	36	30	29	30	30	30	30	22	28	21	30	21	24	18	14	15	14	18	17	18	20	24	23	20	23	31	34	36	38	36	37	30
300ug CBD pure	46	39	35	44	42	44	50	52	48	48	43	50	46	44	44	38	34	34	30	26	24	23	29	22	20	24	20	17	20	19	24	16	14	15	12	14	9	8	13	14	14	16	19	27	30	35	34	38	37
500ug CBD pure	42	28	27	36	29	32	32	32	28	35	32	34	36	34	34	34	29	28	29	30	24	26	26	26	22	22	30	36	23	19	25	26	26	18	18	20	18	12	12	11	8	16	18	18	22	28	24	22	28
750ug CBD pure	41	28	28	37	31	29	28	25	27	27	27	33	30	31	33	26	27	29	24	27	21	27	26	25	21	26	26	26	19	24	29	22	19	17	20	15	13	11	12	11	11	13	16	15	12	18	18	14	20
Time	1.5	2	2.5	3	3.5	4	4.5	5	5.5	6	6.5	7	7.5	8	8.5	9	9.5	10	10.5	11	11.5	12	12.5	13	13.5	14	14.5	15	15.5	16	16.5	17	17.5	18	18.5	19	19.5	20	20.5	21	21.5	22	22.5	23	23.5	24	24.5	25	25.5
<<<<<< Group Activity: Standard Error >>>>>>
Group/Time[m]	30	60	90	120	150	180	210	240	270	300	330	360	390	420	450	480	510	540	570	600	630	660	690	720	750	780	810	840	870	900	930	960	990	1020	1050	1080	1110	1140	1170	1200	1230	1260	1290	1320	1350	1380	1410	1440	1470
000_0.1% Tw80	1.2	1.7	3.5	2.3	2.3	1.7	1.7	2.3	1.7	1.2	3.5	2.3	5.8	4	4.6	5.2	8.7	3.5	3.5	5.2	4	4.6	8.1	8.7	4.6	4.6	5.2	2.3	1.7	3.5	4.6	2.9	4	2.3	0.6	4	4.6	5.2	3.5	2.3	3.5	4	4	4	2.3	0.6	3.5	2.9	4
001_vehicle emulsion	0.7	1.4	0.7	2.1	2.8	2.1	0.7	0	0.7	0.7	6.4	1.4	2.1	0.7	2.8	4.2	2.8	1.4	1.4	2.8	0.7	8.5	3.5	2.1	4.2	0.7	2.8	2.8	2.8	4.2	3.5	6.4	7.1	5.7	9.2	9.9	0.7	0.7	4.2	4.2	4.9	4.9	7.1	0.7	5.7	2.8	0.7	4.9	0.7
002_300ug CBD pure	2.8	2.1	4.2	5.7	7.8	9.2	12.7	11.3	10.6	10.6	4.2	8.5	7.8	11.3	8.5	6.4	4.2	4.2	2.8	0	0.7	4.9	4.9	4.2	7.8	11.3	3.5	2.8	7.1	5.7	3.5	2.8	2.8	7.1	6.4	7.8	4.9	0.7	0.7	1.4	3.5	7.8	5.7	7.8	7.8	7.1	3.5	6.4	7.8
003_500ug CBD pure	0.7	0.7	0	2.1	7.1	1.4	1.4	8.5	2.8	2.1	0	2.1	1.4	0.7	3.5	2.1	0.7	2.8	2.8	1.4	4.2	0.7	1.4	2.1	2.1	1.4	1.4	4.2	0.7	2.1	5.7	2.8	0.7	2.8	2.8	2.8	0.7	5.7	3.5	2.1	4.2	3.5	2.8	5.7	8.5	9.2	12.7	9.9	14.1
004_750ug CBD pure	2.9	1.7	4.6	1.2	3.5	3.5	2.9	0.6	2.9	1.2	2.9	0.6	2.3	2.3	6.4	4	2.3	1.7	1.7	3.5	4.6	6.4	3.5	2.3	2.9	3.5	0.6	0.6	3.5	3.5	2.3	1.7	0.6	1.2	6.4	3.5	2.3	0.6	2.9	4.6	4.6	4.6	6.4	4.6	4.6	4	5.8	5.8	2.9
<<<<<< Group Activity: Number of wells/group >>>>>>
Group/Time[m]	30	60	90	120	150	180	210	240	270	300	330	360	390	420	450	480	510	540	570	600	630	660	690	720	750	780	810	840	870	900	930	960	990	1020	1050	1080	1110	1140	1170	1200	1230	1260	1290	1320	1350	1380	1410	1440	1470
000_0.1% Tw80	3	3	3	3	3	3	3	3	3	3	3	3	3	3	3	3	3	3	3	3	3	3	3	3	3	3	3	3	3	3	3	3	3	3	3	3	3	3	3	3	3	3	3	3	3	3	3	3	3
001_vehicle emulsion	2	2	2	2	2	2	2	2	2	2	2	2	2	2	2	2	2	2	2	2	2	2	2	2	2	2	2	2	2	2	2	2	2	2	2	2	2	2	2	2	2	2	2	2	2	2	2	2	2
002_300ug CBD pure	2	2	2	2	2	2	2	2	2	2	2	2	2	2	2	2	2	2	2	2	2	2	2	2	2	2	2	2	2	2	2	2	2	2	2	2	2	2	2	2	2	2	2	2	2	2	2	2	2
003_500ug CBD pure	2	2	2	2	2	2	2	2	2	2	2	2	2	2	2	2	2	2	2	2	2	2	2	2	2	2	2	2	2	2	2	2	2	2	2	2	2	2	2	2	2	2	2	2	2	2	2	2	2
004_750ug CBD pure	3	3	3	3	3	3	3	3	3	3	3	3	3	3	3	3	3	3	3	3	3	3	3	3	3	3	3	3	3	3	3	3	3	3	3	3	3	3	3	3	3	3	3	3	3	3	3	3	3
<<<<<< Number of Samples per Acquisition Interval [1unit=500values] >>>>>>
Time[m]	30	60	90	120	150	180	210	240	270	300	330	360	390	420	450	480	510	540	570	600	630	660	690	720	750	780	810	840	870	900	930	960	990	1020	1050	1080	1110	1140	1170	1200	1230	1260	1290	1320	1350	1380	1410	1440	1470
#Samples	30	30	30	30	30	30	30	30	30	30	30	30	30	30	30	30	30	30	30	30	30	30	30	30	30	30	30	30	30	30	30	30	30	30	30	30	30	30	30	30	30	30	30	30	30	30	30	30	30
<<<<<< Average Temperature [°C] >>>>>>
Time[m]	30	60	90	120	150	180	210	240	270	300	330	360	390	420	450	480	510	540	570	600	630	660	690	720	750	780	810	840	870	900	930	960	990	1020	1050	1080	1110	1140	1170	1200	1230	1260	1290	1320	1350	1380	1410	1440	1470
Temp[°C]	23	23	23	23	22.8	22.8	22.8	22.8	22.8	22.8	22.8	22.8	22.8	22.8	22.8	22.8	22.8	22.8	22.8	22.8	22.8	22.8	22.8	22.8	22.8	22.8	22.8	22.8	22.8	22.8	22.8	22.8	22.8	22.8	22.8	22.8	22.8	22.8	22.8	22.8	22.8	22.8	22.8	22.8	22.8	22.8	22.8	22.8	22.8
<<<<<< Well Activity >>>>>>
Well	Group/Time[m]	30	60	90	120	150	180	210	240	270	300	330	360	390	420	450	480	510	540	570	600	630	660	690	720	750	780	810	840	870	900	930	960	990	1020	1050	1080	1110	1140	1170	1200	1230	1260	1290	1320	1350	1380	1410	1440
A1	004_750ug CBD pure	47	31	23	35	29	25	24	25	22	29	23	33	28	28	26	23	24	28	25	27	16	15	19	21	18	19	25	25	19	25	34	19	18	16	10	10	8	10	6	5	5	8	26	24	21	26	26	25
B1	003_500ug CBD pure	42	28	27	38	22	31	33	24	25	33	32	32	34	33	30	32	30	25	26	28	19	26	27	28	24	21	32	41	22	21	31	29	25	16	20	17	18	7	8	9	13	20	21	24	30	37	36	32
C1	002_300ug CBD pure	43	37	31	39	35	35	38	40	38	37	39	41	38	32	35	31	30	30	27	26	23	18	24	18	12	13	17	14	13	13	20	13	11	8	6	6	4	7	12	13	11	9	13	19	23	28	31	31
A2	000_0.1% Tw80	56	59	62	73	76	80	82	81	80	79	69	73	63	59	52	48	39	44	31	24	22	23	18	16	12	11	11	15	12	9	14	11	10	6	7	7	8	11	15	17	19	21	22	26	32	37	32	31
B2	004_750ug CBD pure	39	26	37	37	38	25	26	25	32	26	32	33	35	30	28	21	26	27	20	22	16	29	29	26	19	28	25	26	13	18	28	21	18	15	20	14	16	10	16	8	8	8	5	8	8	13	7	6
C2	003_500ug CBD pure	43	27	27	34	36	34	30	41	31	37	32	36	37	34	37	36	28	31	32	31	28	27	24	24	20	24	29	32	24	17	19	23	26	21	15	23	17	18	15	13	4	13	15	12	13	19	11	12
A3	001_vehicle emulsion	50	63	67	77	76	82	85	90	84	79	83	74	64	59	60	54	46	38	29	32	30	21	26	32	17	29	24	33	18	20	15	7	8	8	9	7	17	20	28	27	25	28	38	33	42	36	36	42
B3	000_0.1% Tw80	58	62	73	80	83	84	82	87	85	82	81	80	82	72	62	60	45	42	40	41	35	29	22	45	24	21	27	19	17	15	18	15	16	11	8	18	20	23	22	22	27	30	35	40	40	39	44	40
C3	004_750ug CBD pure	37	26	25	38	27	36	33	24	27	26	27	32	28	36	46	34	31	32	26	33	30	37	31	28	27	30	27	26	25	29	26	25	20	19	31	21	15	12	13	20	20	22	16	13	8	14	20	11
A4	002_300ug CBD pure	49	41	39	50	50	54	63	63	59	58	47	58	53	55	52	44	38	38	33	26	24	28	34	26	27	35	24	20	27	25	27	19	17	22	19	21	14	9	14	16	18	24	25	35	38	42	38	44
B4	001_vehicle emulsion	49	60	66	73	82	78	86	90	86	81	70	71	68	60	55	45	40	35	32	26	31	38	33	28	26	27	18	28	24	28	22	20	22	20	27	27	19	19	19	19	15	18	24	34	30	41	35	32
C4	000_0.1% Tw80	55	64	63	75	82	79	77	79	83	81	75	74	69	69	67	66	67	54	42	39	29	38	44	35	28	26	27	22	13	20	29	21	23	13	6	5	4	6	10	14	15	17	30	31	33	37	35	34
<<<<<< Channel Activity >>>>>>
Channel	Well	Group/Time[m]	30	60	90	120	150	180	210	240	270	300	330	360	390	420	450	480	510	540	570	600	630	660	690	720	750	780	810	840	870	900	930	960	990	1020	1050	1080	1110	1140	1170	1200	1230	1260	1290	1320	1350	1380	1410
CH17	A1.0	004_750ug CBD pure	31	19	42	15	1	0	0	0	0	0	0	0	0	0	0	0	0	0	0	0	0	0	0	0	0	0	0	0	0	0	0	0	0	0	0	0	0	0	0	0	0	0	0	0	0	0	0
CH18	A1.1	004_750ug CBD pure	59	47	11	29	16	8	6	2	0	0	2	0	3	15	24	26	9	2	3	12	2	5	7	3	1	1	5	5	8	22	10	5	3	1	3	17	8	4	1	3	0	0	6	10	6	15	5
CH23	B1.0	003_500ug CBD pure	47	14	3	2	1	1	0	0	0	0	0	0	0	0	0	0	0	0	0	0	0	0	0	0	0	0	0	0	0	0	0	0	0	0	0	0	0	0	0	0	0	0	0	0	0	0	1
CH24	B1.1	003_500ug CBD pure	45	33	25	48	19	21	12	3	5	2	9	7	6	3	14	14	3	2	0	0	3	1	0	2	2	3	3	3	4	4	6	4	4	1	0	1	0	0	0	4	2	0	5	6	6	11	6
CH29	C1.0	002_300ug CBD pure	64	74	70	66	54	52	56	47	32	70	51	30	25	41	42	31	39	17	38	18	22	19	14	28	15	12	14	25	32	33	54	35	28	13	12	10	13	13	20	26	11	14	15	18	13	27	12
CH30	C1.1	002_300ug CBD pure	67	51	28	45	39	38	43	29	34	18	38	23	16	21	48	57	18	7	2	8	18	24	10	25	9	19	9	26	24	38	36	32	24	4	12	2	3	8	10	26	3	7	8	17	21	21	17
CH32	A1.2	004_750ug CBD pure	61	14	18	30	19	18	40	16	25	66	59	16	28	12	1	8	1	0	4	0	9	0	2	1	0	0	3	2	1	0	0	2	0	0	5	0	22	6	6	4	1	17	0	2	2	3	1
CH33	A1.3	004_750ug CBD pure	26	16	7	22	15	2	4	0	2	0	0	7	9	0	1	4	1	0	4	7	3	5	0	0	0	0	0	0	0	0	8	0	2	0	0	0	0	0	1	3	3	0	0	9	1	3	1
CH34	A1.4	004_750ug CBD pure	53	45	32	22	20	5	4	7	0	9	14	28	9	8	0	4	0	0	23	38	3	2	24	5	0	5	0	3	3	1	2	12	1	6	18	0	2	32	33	10	3	0	33	4	3	3	4
CH35	A1.5	004_750ug CBD pure	22	30	27	60	59	41	25	9	15	12	0	10	25	94	65	37	15	31	11	39	25	5	0	8	3	6	12	0	0	3	3	1	0	17	10	1	0	0	0	1	0	0	3	4	4	6	53
CH38	B1.2	003_500ug CBD pure	21	5	6	6	6	1	0	0	0	0	0	0	1	0	0	0	1	0	3	1	1	1	1	4	0	5	0	0	0	0	3	0	0	0	1	0	0	0	0	0	0	0	0	1	2	4	1
CH39	B1.3	003_500ug CBD pure	32	6	14	11	9	19	29	20	5	12	11	8	14	8	4	26	27	9	4	4	3	13	4	11	6	0	1	0	0	0	0	3	0	0	0	0	0	0	0	0	0	0	0	1	1	2	1
CH40	B1.4	003_500ug CBD pure	25	37	12	28	19	6	35	9	3	15	16	0	12	6	21	4	3	8	7	4	2	3	8	0	0	6	2	0	8	2	2	40	1	11	0	0	0	0	0	0	2	0	0	2	3	4	3
CH41	B1.5	003_500ug CBD pure	30	17	32	24	10	23	14	15	15	30	23	15	10	9	18	6	20	1	7	4	10	0	1	15	0	0	0	34	37	33	16	2	0	0	2	0	0	6	1	0	0	1	0	2	5	3	2
CH44	C1.2	002_300ug CBD pure	41	20	5	5	1	2	1	0	0	0	0	0	0	0	0	0	0	0	0	0	0	0	0	0	0	0	0	0	0	0	0	0	0	0	0	0	0	0	0	0	0	0	0	1	1	1	1
CH45	C1.3	002_300ug CBD pure	36	24	27	30	29	22	18	17	24	33	28	41	24	18	16	19	13	6	5	5	4	1	8	5	0	0	2	5	0	10	4	8	2	1	0	0	0	0	0	3	0	0	4	7	8	11	5
CH46	C1.4	002_300ug CBD pure	43	15	43	24	43	12	38	19	21	26	21	18	28	13	9	18	14	13	2	4	1	4	0	3	0	0	0	0	1	0	2	0	6	0	2	0	0	2	4	3	0	0	0	5	3	2	4
CH47	C1.5	002_300ug CBD pure	57	47	20	40	29	22	33	57	52	31	32	60	34	30	38	25	20	10	12	50	10	16	17	19	19	9	10	26	17	25	26	15	24	10	3	5	1	10	15	12	9	13	9	15	25	22	11
CH48	A1.6	004_750ug CBD pure	57	62	14	69	22	31	7	31	80	8	3	47	38	43	55	16	27	2	33	18	28	2	8	20	0	1	12	7	0	3	5	4	4	2	0	9	0	0	0	0	0	2	0	1	5	6	6
CH49	A1.7	004_750ug CBD pure	46	32	8	32	21	55	59	46	10	31	15	40	5	2	18	15	0	33	19	6	16	3	13	5	4	5	5	6	0	3	14	3	4	9	0	1	0	0	0	1	0	4	17	4	5	9	4
CH50	A1.8	004_750ug CBD pure	70	18	28	40	34	51	49	64	20	25	2	22	5	13	18	2	11	40	42	4	0	11	9	0	5	16	21	13	0	6	5	1	1	3	5	7	9	8	0	8	11	46	70	20	15	11	5
CH51	A1.9	004_750ug CBD pure	31	26	34	27	25	8	11	17	24	21	14	7	27	27	14	21	7	39	18	5	3	18	30	18	9	1	9	5	0	0	2	1	5	0	5	1	14	58	0	0	1	1	0	9	3	5	2
CH52	A1.10	004_750ug CBD pure	51	34	10	20	36	51	70	26	29	20	32	11	11	19	54	34	31	37	56	32	16	3	2	9	26	19	16	35	6	17	99	29	6	4	0	0	0	0	1	0	0	5	0	5	4	9	2
CH54	B1.6	003_500ug CBD pure	91	45	18	42	28	42	41	7	14	23	41	30	36	49	32	39	30	30	31	45	27	23	10	10	2	13	4	69	1	17	8	9	0	0	0	0	16	0	0	1	2	0	4	3	2	3	3
CH55	B1.7	003_500ug CBD pure	21	9	21	51	40	19	21	29	31	20	12	28	20	23	32	32	11	27	18	23	0	15	10	9	0	4	51	73	8	4	2	0	8	0	4	0	0	0	0	0	1	0	2	17	2	3	24
CH56	B1.8	003_500ug CBD pure	52	20	15	45	31	46	42	37	11	27	11	28	9	5	24	15	16	12	21	6	2	12	19	10	1	0	0	12	27	2	18	21	2	0	0	0	0	0	0	2	0	2	2	7	4	10	18
CH57	B1.9	003_500ug CBD pure	20	12	22	30	10	4	8	4	18	13	23	13	15	8	20	10	10	5	7	19	13	15	14	0	4	4	31	16	2	0	0	0	0	0	0	0	4	2	0	0	8	0	10	2	2	4	15
CH59	C1.6	002_300ug CBD pure	38	43	27	44	57	60	66	71	52	67	80	96	99	58	84	47	57	67	66	58	44	54	103	25	23	33	67	36	8	6	4	9	7	5	0	6	2	2	43	18	21	22	11	7	9	20	50
CH60	C1.7	002_300ug CBD pure	47	32	32	59	41	69	55	47	49	41	54	59	45	50	55	49	31	47	25	14	30	19	8	9	3	35	32	10	20	23	14	2	1	0	0	0	0	1	1	1	3	0	2	2	7	10	11
CH61	C1.8	002_300ug CBD pure	33	64	35	54	54	53	32	55	64	33	30	39	26	11	23	32	36	47	29	28	47	20	7	16	12	3	5	8	3	10	80	35	10	2	10	2	0	1	0	9	1	8	3	4	11	14	9
CH62	C1.9	002_300ug CBD pure	56	30	43	23	15	29	44	45	27	35	44	33	51	24	36	13	48	26	10	15	21	13	22	45	1	5	2	1	0	4	6	5	0	0	0	1	0	0	2	0	0	0	0	2	5	10	7
CH63	C1.10	002_300ug CBD pure	15	10	10	33	26	11	17	23	20	34	34	23	15	33	15	28	17	24	48	30	26	4	25	4	18	3	16	23	70	0	1	7	0	0	0	0	0	0	3	0	0	6	0	2	2	17	15
CH64	A1.11	004_750ug CBD pure	32	30	21	24	27	19	25	15	8	46	11	54	34	21	7	35	19	36	21	15	42	4	13	17	25	4	20	16	27	72	113	21	22	6	0	0	1	0	0	0	0	0	1	1	2	4	1
CH65	A1.12	004_750ug CBD pure	30	61	22	46	28	16	14	46	10	41	27	92	56	40	72	70	92	73	23	46	21	39	32	38	77	113	68	124	92	107	70	56	132	61	0	1	0	0	1	12	7	0	28	12	4	19	5
CH66	A1.13	004_750ug CBD pure	58	31	16	49	44	17	25	41	12	64	66	75	89	42	37	35	27	36	15	74	1	50	25	23	31	17	60	49	20	50	82	49	11	16	30	16	8	0	9	2	38	34	85	83	47	28	20
CH67	A1.14	004_750ug CBD pure	62	21	39	46	77	32	42	37	32	92	59	72	49	54	36	27	110	75	54	75	35	49	96	127	53	24	75	70	70	48	42	44	51	92	19	6	3	10	10	16	7	7	40	19	27	21	13
CH70	B1.10	003_500ug CBD pure	56	43	75	51	24	86	61	44	93	94	61	135	98	50	55	67	67	65	46	94	45	57	38	103	71	73	97	124	43	79	91	111	165	77	119	57	24	2	37	5	0	0	16	14	69	88	23
CH71	B1.11	003_500ug CBD pure	21	16	20	43	26	37	45	34	40	62	51	34	48	31	28	33	31	31	35	19	17	76	40	12	12	43	59	20	8	3	1	0	7	1	33	18	5	4	0	15	22	28	2	2	2	11	2
CH72	B1.12	003_500ug CBD pure	23	42	41	32	24	41	63	29	48	67	60	65	37	42	67	34	36	36	53	40	11	18	27	4	27	16	3	19	17	33	83	34	14	0	22	48	15	0	0	0	0	2	9	7	16	8	22
CH73	B1.13	003_500ug CBD pure	93	82	40	51	21	11	35	35	24	32	95	43	58	105	50	55	64	50	21	43	27	40	128	164	147	22	55	122	120	79	72	116	48	20	32	11	3	6	21	30	46	142	17	16	42	52	86
CH76	C1.11	002_300ug CBD pure	44	16	3	2	0	1	1	0	0	0	0	0	0	0	0	0	0	0	0	0	0	0	0	0	0	0	0	0	0	0	0	0	0	0	0	0	0	0	0	0	0	0	0	1	1	0	1
CH77	C1.12	002_300ug CBD pure	45	24	34	57	47	53	75	54	62	87	37	26	73	59	51	29	40	45	43	9	10	12	28	0	20	9	4	0	4	22	24	4	0	5	6	3	7	0	0	0	4	7	2	10	5	14	38
CH78	C1.13	002_300ug CBD pure	23	33	23	31	28	29	26	20	45	37	38	41	27	23	19	28	20	16	20	50	16	0	12	5	1	9	10	4	6	0	4	11	13	3	0	4	0	0	0	1	0	0	6	8	8	23	31
CH79	C1.14	002_300ug CBD pure	60	64	53	50	14	60	22	44	59	58	70	77	53	64	53	36	32	76	14	19	9	28	55	37	35	2	5	6	2	1	9	4	19	0	2	31	3	7	1	4	5	5	16	30	19	44	25
CH81	A1.15	004_750ug CBD pure	44	22	16	9	6	10	5	28	49	34	56	26	46	42	26	32	48	31	25	41	32	42	45	62	40	76	65	53	35	40	54	53	24	10	27	34	31	3	3	0	0	13	86	130	130	142	164
CH82	A1.16	004_750ug CBD pure	61	26	51	55	46	54	21	41	63	25	24	50	35	43	15	17	13	44	79	50	30	18	13	23	29	39	52	45	53	55	66	43	36	37	43	82	45	43	38	21	6	8	79	88	92	164	155
CH87	B1.14	003_500ug CBD pure	44	38	48	107	41	103	47	46	40	50	46	56	99	98	67	74	90	64	75	67	77	78	60	67	59	76	93	87	64	65	149	68	71	66	53	98	141	83	50	55	75	91	143	171	167	209	220
CH88	B1.15	003_500ug CBD pure	48	33	37	32	41	43	72	64	60	87	57	53	73	94	54	101	63	65	87	71	65	67	73	43	58	64	120	81	10	14	42	51	85	80	60	38	83	2	19	25	47	56	124	134	164	182	151
CH93	C1.15	002_300ug CBD pure	41	43	58	86	91	59	89	104	63	35	55	82	82	77	69	91	88	84	116	122	101	80	67	74	39	67	88	75	33	47	73	47	56	87	54	39	45	69	97	102	126	67	129	176	205	192	224
CH94	C1.16	002_300ug CBD pure	25	33	9	15	31	17	30	40	34	30	48	41	49	26	30	26	33	26	28	20	34	11	25	12	1	9	28	0	2	5	7	1	4	9	6	0	0	0	6	12	2	9	8	23	40	49	70
CH113	A2.0	000_0.1% Tw80	86	25	8	2	0	1	0	0	0	0	0	0	0	0	0	0	0	0	0	0	0	0	0	0	0	0	0	0	0	0	0	0	0	0	0	0	0	0	0	0	0	0	0	1	0	0	1
CH114	A2.1	000_0.1% Tw80	41	63	47	79	77	75	77	74	68	72	32	49	42	37	32	37	18	4	11	13	13	5	13	1	0	10	4	6	0	0	0	0	1	0	4	4	6	3	8	4	15	4	16	8	5	25	13
CH115	A2.2	000_0.1% Tw80	67	87	89	73	96	94	84	81	73	85	79	50	49	54	48	33	36	49	32	17	23	54	18	43	26	13	16	36	28	38	61	44	38	29	56	30	6	17	21	23	17	25	26	23	15	26	46
CH118	B2.0	004_750ug CBD pure	31	26	86	33	5	8	3	2	1	1	1	2	0	0	3	1	0	1	2	3	4	6	0	0	2	0	0	0	0	0	7	0	2	8	0	0	0	0	0	0	0	1	1	2	3	6	3
CH119	B2.1	004_750ug CBD pure	48	31	57	54	90	37	43	12	13	1	31	24	10	59	33	43	0	4	7	0	8	6	6	7	7	5	6	13	6	10	13	10	15	0	7	0	23	14	1	3	2	1	1	6	7	15	7
CH120	B2.2	004_750ug CBD pure	32	28	40	33	53	26	42	4	8	4	16	10	24	12	9	6	13	12	2	35	4	3	0	1	0	2	2	7	4	4	3	4	5	21	35	39	0	0	0	1	0	0	0	4	6	38	7
CH121	B2.3	004_750ug CBD pure	59	23	21	24	35	17	4	2	13	5	11	19	0	13	30	2	12	30	14	65	10	38	105	59	1	8	8	0	8	35	2	1	2	0	0	0	0	0	0	0	3	0	1	2	3	12	4
CH124	C2.0	003_500ug CBD pure	30	19	3	1	1	1	1	0	0	0	0	0	0	0	0	0	0	0	0	0	0	0	0	0	0	0	0	0	0	0	0	0	0	0	0	0	0	0	0	0	0	0	0	0	0	0	0
CH125	C2.1	003_500ug CBD pure	28	38	36	40	32	22	41	86	30	7	18	9	29	22	18	5	3	8	13	2	15	3	3	20	3	4	34	38	4	6	13	7	12	1	1	0	0	1	1	3	6	4	4	7	9	14	8
CH126	C2.2	003_500ug CBD pure	53	32	35	38	39	21	18	30	19	15	9	26	2	11	4	11	7	14	6	5	15	2	2	5	21	91	22	53	1	3	3	0	0	2	4	0	5	73	11	0	0	84	71	1	3	8	5
CH128	A2.3	000_0.1% Tw80	98	116	62	97	90	93	103	116	111	84	87	83	85	54	63	50	42	46	8	12	17	21	9	21	14	18	18	40	30	33	44	33	39	10	8	11	11	20	36	23	14	27	49	29	40	90	113
CH129	A2.4	000_0.1% Tw80	69	61	44	66	60	81	66	69	85	75	86	56	52	38	37	39	30	31	6	10	3	8	21	1	0	1	0	0	1	7	7	0	0	0	2	4	0	12	8	9	8	10	11	30	18	42	17
CH130	A2.5	000_0.1% Tw80	51	31	38	57	61	68	96	82	76	85	57	46	42	45	46	33	20	15	15	5	14	14	2	1	0	2	0	2	0	0	5	2	0	0	0	0	0	5	2	0	10	4	7	15	11	18	10
CH131	A2.6	000_0.1% Tw80	41	42	80	91	100	72	74	68	81	89	75	60	41	40	45	17	14	35	14	14	11	1	13	13	1	0	5	4	2	0	1	8	0	0	0	0	2	3	10	2	20	4	8	25	10	5	10
CH132	A2.7	000_0.1% Tw80	58	59	64	75	66	73	77	71	82	71	65	94	46	67	60	62	50	41	27	30	34	41	21	32	10	22	20	58	41	8	8	24	22	3	8	9	12	22	19	34	39	20	19	22	50	28	13
CH134	B2.4	004_750ug CBD pure	31	38	28	30	62	24	58	14	79	64	43	59	11	17	3	11	44	8	2	1	18	26	28	9	0	8	5	6	2	8	12	6	7	0	0	0	0	9	23	2	0	0	2	5	6	11	5
CH135	B2.5	004_750ug CBD pure	25	20	10	38	19	20	20	28	33	19	32	26	15	25	31	16	10	5	6	13	6	7	3	17	11	75	56	23	1	15	41	10	5	1	0	1	17	30	47	24	29	19	4	18	7	13	6
CH136	B2.6	004_750ug CBD pure	19	26	35	41	28	10	21	26	39	28	25	12	34	15	31	42	76	38	8	32	4	43	21	18	4	2	11	14	4	7	22	15	18	0	15	0	0	0	0	0	28	8	0	16	10	9	5
CH137	B2.7	004_750ug CBD pure	23	28	26	21	32	9	11	19	7	27	46	39	26	33	37	2	9	8	21	10	0	17	5	1	20	9	0	2	0	0	13	0	39	21	3	4	16	0	0	0	0	15	20	1	1	6	4
CH139	C2.3	003_500ug CBD pure	49	37	40	53	54	55	69	78	59	70	47	92	102	68	82	36	28	53	45	53	72	47	61	22	68	24	18	7	4	7	0	1	13	7	0	29	4	2	18	1	0	0	0	2	2	8	1
CH140	C2.4	003_500ug CBD pure	17	8	19	20	26	12	17	19	10	32	20	40	22	38	33	27	15	6	7	19	19	35	4	7	2	22	16	3	12	3	5	0	2	15	11	0	0	0	0	0	0	0	0	1	2	3	3
CH141	C2.5	003_500ug CBD pure	41	23	38	70	54	57	32	53	40	39	33	30	21	30	32	40	25	5	3	24	30	15	20	4	8	11	16	8	2	5	15	7	10	0	0	23	21	10	14	3	4	1	5	6	7	16	5
CH142	C2.6	003_500ug CBD pure	47	24	8	20	30	30	13	12	33	29	6	22	4	20	26	48	14	15	33	31	16	19	9	7	11	7	1	3	7	3	10	31	5	0	1	11	0	0	21	4	4	7	5	3	18	19	9
CH143	C2.7	003_500ug CBD pure	37	32	18	22	11	22	24	30	10	24	32	39	1	4	5	22	6	10	5	13	1	18	15	34	0	3	35	8	21	4	2	0	0	13	27	132	112	31	0	2	2	4	11	3	2	29	3
CH144	A2.8	000_0.1% Tw80	57	69	77	87	97	84	84	104	104	102	89	112	88	84	75	86	86	127	18	10	24	64	7	7	10	6	4	0	1	5	10	10	1	16	4	2	5	5	9	10	9	19	12	27	23	22	22
CH145	A2.9	000_0.1% Tw80	49	36	38	50	51	68	98	65	81	62	75	69	59	33	25	40	15	12	5	9	16	6	0	4	0	0	0	0	0	1	4	0	0	2	0	0	4	2	2	6	10	21	10	13	14	32	29
CH146	A2.10	000_0.1% Tw80	70	69	55	46	66	83	85	88	80	90	70	93	48	44	39	20	29	23	17	11	5	0	16	6	0	0	0	0	0	2	3	0	0	0	0	0	2	4	0	13	13	12	8	10	25	28	25
CH147	A2.11	000_0.1% Tw80	44	75	93	101	59	98	103	85	68	82	84	68	75	54	30	58	30	57	25	32	10	16	6	1	2	6	0	11	2	0	3	0	0	0	0	6	12	2	0	4	11	52	12	21	23	11	6
CH148	A2.12	000_0.1% Tw80	35	52	56	51	85	73	92	86	72	56	72	85	53	74	83	74	56	57	46	52	32	35	45	22	23	18	10	5	8	0	1	4	4	8	26	32	45	39	61	40	15	20	31	28	42	22	18
CH150	B2.8	004_750ug CBD pure	47	24	47	37	70	34	27	48	47	13	30	84	52	59	7	25	24	30	15	14	52	14	29	42	3	22	1	1	3	2	14	47	0	4	6	0	10	0	0	0	0	0	2	6	7	10	13
CH151	B2.9	004_750ug CBD pure	27	28	36	39	28	4	13	33	42	28	52	70	42	29	23	6	17	26	13	10	19	21	10	0	27	26	14	2	11	14	8	11	10	0	20	0	6	0	0	0	2	2	5	3	2	7	3
CH152	B2.10	004_750ug CBD pure	41	26	56	55	46	53	27	43	28	9	37	27	33	51	19	10	22	30	44	16	6	18	16	28	3	5	38	20	14	35	52	59	17	15	39	14	1	1	2	5	0	4	6	6	9	22	16
CH153	B2.11	004_750ug CBD pure	43	33	14	34	33	61	14	11	24	45	43	28	23	29	8	17	46	22	21	27	17	59	59	80	69	48	53	33	0	0	3	16	75	35	7	17	5	27	13	18	13	6	5	3	6	24	9
CH155	C2.8	003_500ug CBD pure	60	60	47	38	41	86	38	39	38	74	32	30	83	59	69	76	92	70	59	84	55	21	34	48	43	38	34	100	94	99	20	21	74	40	3	0	0	31	18	1	0	0	0	7	13	43	16
CH156	C2.9	003_500ug CBD pure	37	38	35	35	26	28	42	56	76	36	50	65	74	41	51	42	38	88	75	65	50	73	56	77	38	88	88	45	95	45	28	94	105	14	0	2	18	38	4	14	3	0	5	10	3	7	5
CH157	C2.10	003_500ug CBD pure	28	16	33	40	45	12	17	23	43	50	40	61	67	38	13	29	14	15	54	30	26	27	11	51	40	10	45	8	5	6	5	6	17	0	5	2	0	0	1	15	0	1	1	4	37	29	5
CH158	C2.11	003_500ug CBD pure	52	21	27	23	35	27	15	19	41	74	76	64	14	55	73	72	45	55	75	55	35	23	37	33	19	7	103	77	42	11	7	21	5	0	0	0	1	0	0	3	27	98	54	66	16	15	25
CH159	C2.12	003_500ug CBD pure	45	10	7	18	10	2	8	13	14	21	23	15	60	11	0	11	26	30	31	21	32	14	5	50	2	8	7	11	57	4	10	31	1	5	8	0	0	0	0	0	0	1	10	24	7	11	2
CH160	A2.13	000_0.1% Tw80	36	53	60	65	88	76	68	76	84	71	74	81	102	113	88	91	70	57	77	35	34	33	19	29	10	24	58	49	37	1	19	21	0	2	0	0	0	2	19	19	32	13	32	22	46	38	31
CH161	A2.14	000_0.1% Tw80	29	38	41	67	76	87	71	93	83	96	57	80	61	88	47	43	37	54	24	13	6	2	28	13	0	1	0	0	2	0	4	1	0	0	0	0	0	2	0	5	7	21	19	19	66	41	25
CH162	A2.15	000_0.1% Tw80	46	49	78	114	115	107	90	95	93	120	80	125	101	88	61	47	56	37	67	46	57	22	34	25	2	7	0	0	2	0	3	0	0	9	0	6	2	11	10	25	28	29	29	29	40	66	19
CH163	A2.16	000_0.1% Tw80	80	84	128	120	100	130	134	124	121	101	86	90	122	82	112	87	73	99	135	105	76	63	55	47	109	60	54	51	50	53	60	46	59	17	18	16	22	34	52	71	80	79	84	116	110	134	146
CH166	B2.12	004_750ug CBD pure	46	37	56	22	30	34	66	26	29	43	41	30	100	23	138	60	59	89	36	28	17	53	53	70	65	77	38	86	23	56	73	69	36	31	31	10	36	4	117	49	5	0	0	2	4	3	2
CH167	B2.13	004_750ug CBD pure	59	26	36	46	26	20	32	54	19	75	72	68	111	35	39	47	22	69	45	39	21	56	68	18	16	60	71	116	19	56	31	19	2	0	4	15	42	4	0	1	1	21	9	33	10	6	9
CH168	B2.14	004_750ug CBD pure	50	16	30	63	45	19	19	59	106	30	16	14	4	13	18	35	44	44	42	14	27	50	57	24	18	12	45	35	65	28	87	31	17	21	4	0	0	0	0	3	0	1	15	11	43	15	19
CH169	B2.15	004_750ug CBD pure	50	11	13	27	7	28	12	25	30	23	18	19	81	75	27	19	13	15	35	42	35	40	6	38	59	81	59	53	44	26	59	40	41	80	147	116	99	65	45	14	41	43	12	2	4	11	3
CH172	C2.13	003_500ug CBD pure	55	31	67	83	116	131	87	112	64	71	86	67	89	68	95	65	91	53	35	55	44	87	46	19	45	53	60	138	46	72	116	136	136	176	137	146	120	103	133	151	24	9	18	30	66	55	30
CH173	C2.14	003_500ug CBD pure	72	29	25	45	35	52	52	65	22	15	19	21	13	69	58	34	22	26	40	18	32	31	32	12	31	12	4	8	1	5	5	2	18	14	5	2	0	5	0	4	0	0	11	15	3	19	25
CH174	C2.15	003_500ug CBD pure	52	25	12	20	40	15	23	50	13	52	47	23	22	23	33	53	21	51	53	23	16	20	36	5	7	32	12	27	18	10	45	15	27	70	21	6	0	0	0	0	0	12	58	11	6	3	4
CH175	C2.16	003_500ug CBD pure	30	10	5	14	10	13	5	16	16	15	2	16	27	27	37	34	21	32	8	26	15	19	33	18	1	0	4	11	3	0	32	24	9	3	24	34	0	4	32	16	0	6	2	7	23	36	49
CH208	A3.0	001_vehicle emulsion	65	67	79	78	80	102	76	117	81	100	120	96	78	75	90	129	103	85	84	149	90	50	46	18	7	38	11	3	0	5	6	1	2	0	0	0	0	1	16	17	0	10	6	6	7	11	31
CH209	A3.1	001_vehicle emulsion	34	57	44	51	47	69	61	80	93	55	65	52	42	27	46	28	18	27	32	7	16	25	77	230	49	52	82	110	3	0	0	0	5	3	30	50	10	29	0	4	7	2	3	4	3	4	13
CH210	A3.2	001_vehicle emulsion	61	40	50	58	70	63	71	78	72	72	65	61	47	36	28	31	56	46	51	63	57	25	73	31	7	37	9	10	0	1	9	0	0	0	0	1	46	24	5	1	0	0	4	5	7	6	4
CH211	A3.3	001_vehicle emulsion	36	57	73	84	76	79	82	87	66	70	88	44	77	51	54	41	41	33	11	23	19	29	25	32	32	25	31	132	58	59	55	40	46	23	19	21	10	17	34	35	17	16	52	30	28	31	20
CH214	B3.0	000_0.1% Tw80	78	96	86	99	92	89	103	99	93	115	138	104	85	84	90	88	67	49	40	48	62	93	7	23	12	2	2	5	0	0	9	0	6	0	6	0	1	3	7	14	13	5	10	17	19	23	29
CH215	B3.1	000_0.1% Tw80	28	22	35	48	56	54	54	70	75	54	56	77	43	61	43	31	29	21	23	38	7	23	15	72	43	107	19	11	14	1	2	2	3	3	0	1	0	0	0	0	3	2	3	12	3	5	10
CH216	B3.2	000_0.1% Tw80	51	61	56	46	64	81	72	66	67	59	56	63	57	59	61	28	27	9	19	6	19	3	11	10	14	2	8	1	12	2	0	0	4	0	0	3	0	0	3	0	20	5	3	26	20	32	3
CH217	B3.3	000_0.1% Tw80	64	88	100	131	99	72	85	78	73	83	86	92	112	125	93	45	77	102	116	108	47	43	19	30	12	40	86	34	20	20	24	14	21	7	10	1	2	7	10	13	8	11	13	27	13	23	22
CH220	C3.0	004_750ug CBD pure	56	61	39	51	46	69	123	48	49	93	141	89	66	131	131	74	45	100	60	76	144	111	71	72	47	59	85	49	30	65	63	90	45	41	13	2	2	8	64	28	27	7	34	10	15	26	39
CH221	C3.1	004_750ug CBD pure	57	16	28	59	31	7	64	41	28	17	29	65	48	38	45	24	60	0	8	12	18	48	33	35	69	19	50	26	61	10	10	0	0	0	0	0	0	0	0	23	11	7	44	3	6	8	4
CH222	C3.2	004_750ug CBD pure	36	26	28	55	41	51	18	20	3	1	6	1	21	0	65	1	0	12	9	12	6	32	0	2	3	35	44	13	5	26	11	9	11	0	0	1	0	0	1	4	0	1	6	10	10	14	6
CH223	C3.3	004_750ug CBD pure	35	4	6	13	7	10	1	0	0	0	2	0	1	8	2	14	8	0	0	7	9	2	3	0	0	37	5	0	6	1	17	8	18	3	0	0	0	0	20	14	15	26	4	5	11	2	3
CH224	A3.4	001_vehicle emulsion	34	50	58	67	54	64	64	81	95	81	92	75	41	32	65	42	32	17	2	10	3	8	3	6	3	3	8	8	5	13	11	7	4	1	1	3	6	3	2	1	5	13	25	15	14	13	14
CH225	A3.5	001_vehicle emulsion	37	48	39	33	46	42	56	85	66	74	44	60	59	28	43	22	30	11	19	7	3	4	7	5	0	6	3	1	0	0	0	0	0	0	3	3	15	1	2	4	0	15	1	15	32	13	8
CH226	A3.6	001_vehicle emulsion	58	66	51	72	90	79	85	83	55	69	74	49	65	62	30	28	32	72	42	38	14	11	8	10	0	1	6	25	2	8	8	3	2	0	3	1	16	27	83	20	8	9	3	20	19	13	10
CH227	A3.7	001_vehicle emulsion	34	36	62	92	78	67	73	59	71	65	56	61	66	72	34	44	45	46	32	2	12	10	0	3	0	5	2	2	0	10	1	0	1	0	2	0	5	8	8	16	19	2	2	10	10	5	6
CH228	A3.8	001_vehicle emulsion	47	72	60	69	59	101	79	65	56	55	79	56	49	63	51	50	28	41	21	17	21	37	15	16	13	5	3	2	0	2	1	0	2	14	1	6	11	8	10	42	59	24	36	20	42	32	22
CH230	B3.4	000_0.1% Tw80	59	56	34	57	51	61	78	65	88	99	82	70	69	46	51	57	40	72	63	44	57	18	2	2	3	2	17	4	2	7	9	3	2	0	1	1	2	1	2	5	5	4	9	10	11	14	20
CH231	B3.5	000_0.1% Tw80	66	38	74	51	67	64	61	71	51	90	74	65	91	48	42	42	46	22	23	7	9	6	0	7	2	4	1	7	1	0	3	0	1	2	0	3	0	0	0	5	0	24	26	7	5	8	10
CH232	B3.6	000_0.1% Tw80	41	40	51	54	74	78	53	86	77	74	64	70	76	56	49	64	60	62	31	32	25	11	31	11	6	16	16	18	21	22	45	24	22	12	38	164	165	158	80	19	11	15	25	15	15	24	24
CH233	B3.7	000_0.1% Tw80	68	44	49	87	63	79	71	79	76	64	53	73	70	58	58	37	32	22	6	18	13	5	47	58	21	1	0	2	2	8	1	0	0	2	0	2	0	0	5	2	7	10	0	8	4	9	9
CH235	C3.4	004_750ug CBD pure	25	7	10	17	10	8	6	1	5	17	7	20	14	43	19	10	9	29	68	39	19	8	14	23	3	5	3	7	7	3	8	12	1	0	3	3	1	2	0	4	3	0	6	0	4	7	2
CH236	C3.5	004_750ug CBD pure	47	14	16	49	27	22	8	59	14	29	52	37	33	37	53	6	15	27	39	35	1	27	7	10	13	0	11	3	10	16	28	24	43	21	27	1	8	10	6	2	2	44	5	8	2	9	19
CH237	C3.6	004_750ug CBD pure	26	22	23	37	20	11	9	2	18	24	9	18	12	13	15	14	10	8	22	16	5	5	7	7	3	7	6	25	8	3	21	16	0	1	0	23	0	0	0	0	5	0	0	2	2	15	19
CH238	C3.7	004_750ug CBD pure	33	26	22	37	25	44	11	40	38	38	44	46	32	23	85	73	28	35	28	21	38	53	9	2	16	26	4	7	3	20	14	10	9	46	149	32	11	4	2	3	5	6	5	18	7	13	113
CH239	C3.8	004_750ug CBD pure	21	31	10	27	44	12	14	10	68	32	6	3	11	20	8	3	11	18	4	10	45	10	0	13	7	3	44	45	25	81	11	12	23	22	32	18	21	46	2	26	3	10	35	11	7	13	7
CH240	A3.9	001_vehicle emulsion	35	88	73	90	73	103	99	84	78	96	117	104	96	94	130	92	21	34	12	6	0	2	1	4	0	6	0	0	0	1	9	0	0	0	4	0	0	0	2	0	2	2	8	6	6	11	5
CH241	A3.10	001_vehicle emulsion	29	57	53	58	68	87	67	100	103	80	91	56	62	46	31	38	31	32	9	12	0	6	9	8	0	0	0	0	0	2	3	0	0	0	0	0	0	0	0	3	3	36	1	11	6	9	12
CH242	A3.11	001_vehicle emulsion	48	52	57	71	99	76	124	106	90	48	106	76	72	54	61	57	52	24	19	7	16	4	7	3	7	0	0	2	4	1	13	0	0	0	0	6	4	11	6	4	14	16	15	13	50	19	15
CH243	A3.12	001_vehicle emulsion	61	77	80	85	86	92	114	94	96	83	70	63	30	62	49	40	43	24	11	27	35	15	4	0	8	29	16	3	0	0	2	2	0	0	1	9	116	121	110	64	12	20	60	32	26	11	22
CH244	A3.13	001_vehicle emulsion	39	50	58	64	59	52	79	68	56	54	60	71	41	55	54	44	27	35	39	51	18	5	13	32	13	12	19	35	24	16	2	0	2	1	0	2	1	1	13	3	8	18	60	21	49	41	62
CH246	B3.8	000_0.1% Tw80	72	50	62	76	80	70	84	76	87	85	103	97	102	79	46	96	34	23	0	39	13	8	9	140	2	11	24	13	15	15	20	13	13	3	2	3	3	9	7	12	7	17	14	12	13	21	43
CH247	B3.9	000_0.1% Tw80	56	34	85	69	68	73	69	100	91	97	76	75	90	83	62	48	29	24	24	11	10	5	0	5	8	0	5	5	2	4	12	9	11	9	0	0	4	0	3	0	11	19	3	8	24	37	70
CH248	B3.10	000_0.1% Tw80	43	64	94	80	94	71	96	127	104	113	57	86	73	66	74	89	48	15	57	21	15	6	15	35	24	1	5	3	5	4	3	7	8	0	9	33	0	2	5	7	19	14	21	31	17	7	13
CH249	B3.11	000_0.1% Tw80	60	61	84	81	110	105	92	86	102	77	64	64	66	66	41	27	12	43	25	32	26	10	7	9	8	1	2	0	6	0	0	0	2	0	0	3	0	5	23	5	14	13	14	35	47	31	34
CH251	C3.9	004_750ug CBD pure	8	1	9	5	5	6	12	4	5	5	13	6	2	13	18	11	15	16	26	16	14	22	10	20	23	16	6	27	31	7	11	12	10	55	38	14	9	6	1	3	10	1	1	1	0	1	3
CH252	C3.10	004_750ug CBD pure	46	19	55	40	19	26	64	17	50	27	23	38	24	40	50	44	19	28	25	48	32	14	21	21	20	1	0	8	12	1	13	10	3	4	2	37	23	3	0	18	1	8	10	13	6	18	16
CH253	C3.11	004_750ug CBD pure	35	38	36	39	28	92	92	72	59	22	53	65	43	30	47	92	41	11	40	59	58	37	71	23	33	29	43	33	29	30	28	59	47	11	9	6	26	28	15	15	9	7	13	16	12	22	15
CH254	C3.12	004_750ug CBD pure	55	27	9	33	24	33	7	9	10	7	11	27	35	65	56	30	29	62	41	58	26	79	46	36	13	24	7	12	18	27	34	7	12	8	3	33	90	73	82	98	38	60	11	6	11	22	28
CH255	C3.13	004_750ug CBD pure	31	15	15	21	26	8	9	10	2	30	10	6	56	31	7	8	40	24	13	48	7	10	25	16	9	21	16	17	27	27	16	11	14	20	78	68	0	1	16	63	68	12	4	5	6	19	21
CH257	A3.14	001_vehicle emulsion	96	77	96	97	108	101	112	131	132	125	102	104	95	89	96	123	133	50	41	81	37	34	59	68	47	107	48	66	39	45	59	59	59	17	20	15	17	24	49	30	30	30	55	44	61	65	59
CH258	A3.15	001_vehicle emulsion	58	90	86	109	98	102	95	81	99	98	81	74	48	40	43	29	30	16	9	9	133	62	17	10	17	17	11	16	8	11	23	9	12	8	3	2	4	10	24	22	42	52	111	115	120	91	96
CH259	A3.16	001_vehicle emulsion	83	90	112	125	97	119	108	129	120	119	108	148	128	117	107	74	59	51	59	34	31	23	84	68	80	149	160	149	161	160	47	6	2	75	67	6	22	58	119	187	191	209	205	202	242	231	213
CH262	B3.12	000_0.1% Tw80	92	110	129	115	121	119	110	138	109	112	134	127	150	117	98	117	94	98	90	111	84	103	80	59	42	22	88	30	2	1	2	9	3	43	3	3	0	0	0	14	15	14	37	22	25	27	29
CH263	B3.13	000_0.1% Tw80	54	77	88	100	103	124	106	74	104	55	100	83	86	72	55	73	43	29	20	18	60	64	31	52	45	27	11	19	15	26	40	19	16	3	8	1	12	1	8	13	19	16	36	40	54	59	64
CH264	B3.14	000_0.1% Tw80	35	78	67	108	91	102	94	91	80	77	74	61	63	58	80	54	13	22	5	10	15	13	25	63	3	3	6	12	5	8	11	8	9	1	3	1	11	10	8	34	48	76	108	129	127	98	114
CH265	B3.15	000_0.1% Tw80	54	74	79	81	93	94	78	86	79	66	75	73	78	67	54	63	74	60	90	120	94	55	50	145	135	95	143	134	150	120	106	136	130	92	47	75	126	166	192	217	232	237	236	242	241	208	209
CH268	C3.14	004_750ug CBD pure	46	26	63	102	55	62	87	31	70	20	35	54	43	97	117	96	101	82	28	77	53	97	120	103	99	58	50	77	67	104	51	101	49	60	115	101	47	29	2	20	83	90	42	57	18	9	21
CH269	C3.15	004_750ug CBD pure	35	39	29	27	30	94	26	43	30	60	17	44	18	18	48	56	46	53	3	13	23	23	55	34	51	83	64	41	10	19	55	10	8	21	35	16	0	0	8	1	0	0	0	4	11	9	5
CH270	C3.16	004_750ug CBD pure	30	62	24	32	18	54	5	6	12	19	9	18	15	10	10	24	51	32	33	10	15	48	35	51	43	79	15	53	68	46	59	39	50	7	15	7	14	0	9	19	61	87	47	46	11	30	12
CH289	A4.0	002_300ug CBD pure	54	35	50	55	59	33	75	56	64	69	67	75	69	60	42	40	58	25	39	30	17	8	28	10	5	20	13	6	15	10	21	5	12	7	4	5	9	9	3	29	4	21	0	4	5	11	6
CH290	A4.1	002_300ug CBD pure	75	70	67	75	49	39	53	65	47	72	37	62	54	38	38	44	42	47	19	20	24	34	50	22	46	134	44	22	78	35	9	2	0	0	0	0	1	4	3	0	10	2	12	12	3	8	3
CH295	B4.0	001_vehicle emulsion	52	55	26	36	51	42	63	48	80	67	65	69	81	75	71	58	44	25	46	31	19	14	11	9	6	14	28	31	21	8	6	32	103	71	117	108	1	0	0	1	12	9	14	43	15	49	11
CH296	B4.1	001_vehicle emulsion	23	46	63	47	53	39	60	62	47	45	73	52	46	46	36	34	28	31	6	16	13	10	31	17	39	21	16	15	8	15	7	5	6	0	0	1	0	0	1	3	2	4	18	12	6	12	9
CH301	C4.0	000_0.1% Tw80	57	105	51	66	50	46	64	70	57	58	73	68	37	74	56	29	39	43	19	18	17	18	13	5	5	6	17	13	8	9	19	9	11	2	1	0	0	7	14	14	19	8	10	20	15	14	11
CH302	C4.1	000_0.1% Tw80	48	51	36	39	55	45	48	50	46	34	36	35	43	42	36	41	46	16	14	21	25	16	4	17	10	3	4	28	11	3	44	0	0	2	0	6	2	2	2	8	2	11	3	17	5	14	4
CH304	A4.2	002_300ug CBD pure	40	59	24	50	82	69	82	92	81	85	84	105	94	69	66	75	55	73	68	38	46	11	22	18	12	15	2	14	7	56	74	40	16	1	8	0	0	11	25	19	9	5	20	17	16	7	72
CH305	A4.3	002_300ug CBD pure	31	35	22	28	36	46	54	62	62	66	39	64	42	38	43	19	47	45	43	20	46	36	21	5	20	21	57	40	62	21	25	2	1	0	5	0	4	1	3	0	14	6	1	1	1	21	2
CH306	A4.4	002_300ug CBD pure	56	28	46	36	17	33	62	38	47	37	67	57	31	56	23	47	22	0	25	17	25	43	22	70	49	66	9	16	5	0	14	0	0	0	0	9	15	2	2	7	15	12	2	7	36	18	13
CH307	A4.5	002_300ug CBD pure	41	41	53	67	87	81	76	99	58	63	54	54	54	62	42	72	26	47	10	49	48	40	24	52	56	26	18	40	39	43	46	38	38	17	13	14	8	18	43	30	45	14	30	31	19	29	18
CH310	B4.2	001_vehicle emulsion	44	69	69	95	85	77	87	95	107	114	85	105	103	100	84	81	61	77	98	88	70	96	165	142	145	153	42	53	56	40	60	39	40	16	18	13	15	12	49	35	36	81	37	19	22	29	30
CH311	B4.3	001_vehicle emulsion	26	46	43	52	71	67	52	77	54	66	58	64	62	65	27	25	24	50	29	2	9	4	2	5	3	0	5	6	4	9	16	1	12	4	0	0	0	5	1	20	0	1	12	5	2	16	23
CH312	B4.4	001_vehicle emulsion	45	60	37	71	65	76	92	73	68	76	53	36	56	61	56	54	41	18	12	11	25	17	23	14	17	11	11	32	12	23	44	41	15	2	5	8	2	3	10	10	7	9	27	21	13	18	38
CH313	B4.5	001_vehicle emulsion	53	69	95	101	127	91	97	91	77	64	53	69	92	98	79	52	63	47	26	29	68	73	65	53	35	33	38	81	71	74	65	71	62	32	19	12	24	34	40	40	31	27	31	55	24	34	21
CH316	C4.2	000_0.1% Tw80	94	97	67	70	103	83	90	88	109	117	90	131	105	89	100	136	170	116	151	95	42	134	205	196	192	176	165	44	16	29	16	7	16	0	6	10	1	0	12	1	25	10	24	9	14	21	16
CH317	C4.3	000_0.1% Tw80	29	27	35	58	46	50	41	38	43	47	36	38	57	50	45	24	40	27	9	16	16	2	6	1	5	2	6	1	1	4	7	4	3	2	4	1	5	0	0	3	3	2	4	15	7	14	9
CH318	C4.4	000_0.1% Tw80	54	42	31	67	51	69	64	69	65	69	46	45	47	57	52	46	62	38	63	43	24	5	22	14	18	3	10	4	6	3	10	6	0	0	1	1	0	2	1	4	4	0	15	6	14	21	3
CH319	C4.5	000_0.1% Tw80	49	65	97	98	97	94	107	105	99	55	61	67	61	52	43	64	87	80	19	74	46	23	17	22	17	17	52	58	25	89	162	155	59	12	6	4	9	11	20	22	23	46	42	23	17	31	16
CH320	A4.6	002_300ug CBD pure	34	21	32	37	23	35	54	43	42	63	36	31	39	31	49	28	31	39	25	17	32	18	31	29	27	12	23	20	49	41	48	28	27	31	9	3	1	0	22	31	83	212	242	214	179	147	151
CH321	A4.7	002_300ug CBD pure	30	37	40	83	52	76	75	78	64	37	14	46	38	52	28	27	17	3	8	16	29	49	45	12	9	10	4	17	11	3	7	1	3	0	0	0	0	6	0	0	0	0	2	3	40	62	23
CH322	A4.8	002_300ug CBD pure	53	48	40	33	28	51	55	34	43	34	13	41	39	55	34	22	18	17	21	1	16	5	3	2	0	7	6	11	0	2	3	0	12	0	0	0	0	2	22	8	14	5	21	23	51	16	9
CH323	A4.9	002_300ug CBD pure	46	29	28	63	46	89	58	56	53	61	37	47	15	44	28	21	37	39	38	36	11	2	4	30	10	8	4	23	4	1	4	3	0	22	8	0	0	0	8	3	3	8	1	7	6	29	13
CH324	A4.10	002_300ug CBD pure	53	48	28	28	54	37	40	64	65	90	76	58	48	42	41	55	50	38	64	27	8	100	94	49	113	39	29	43	15	6	19	9	1	30	21	74	0	4	7	80	58	60	5	113	102	101	49
CH326	B4.6	001_vehicle emulsion	45	65	61	85	46	86	98	74	77	94	75	58	52	42	32	55	25	28	21	10	21	12	25	8	29	2	5	4	34	6	1	0	2	0	0	1	3	6	4	4	25	12	13	8	13	5	3
CH327	B4.7	001_vehicle emulsion	43	51	53	52	85	66	73	88	71	99	77	78	67	38	43	43	24	12	8	15	43	7	2	6	2	12	15	10	8	14	22	8	4	3	7	5	3	7	3	2	1	1	3	12	8	31	23
CH328	B4.8	001_vehicle emulsion	26	29	42	54	73	83	64	89	86	88	79	84	64	85	45	30	46	11	15	11	16	16	7	10	0	3	11	0	2	5	5	0	0	0	0	42	13	2	1	2	1	5	4	6	12	64	13
CH329	B4.9	001_vehicle emulsion	33	68	66	69	91	81	103	89	91	83	82	66	84	56	76	43	79	64	72	18	23	3	9	20	13	0	0	9	4	4	3	2	0	0	0	0	7	2	4	2	5	2	8	10	29	44	27
CH331	C4.6	000_0.1% Tw80	87	87	50	49	86	111	85	60	85	126	116	138	144	132	105	81	101	79	84	90	100	197	244	134	56	29	9	17	19	10	17	14	8	2	6	2	0	12	6	49	34	47	101	50	56	46	31
CH332	C4.7	000_0.1% Tw80	44	43	43	58	55	48	46	60	63	72	68	55	52	49	39	26	40	22	17	11	19	2	7	3	0	0	0	0	7	2	4	0	0	0	0	0	9	0	0	2	2	4	4	17	21	25	12
CH333	C4.8	000_0.1% Tw80	59	51	92	73	48	54	82	79	67	100	84	67	52	39	50	47	45	36	29	32	32	20	12	2	4	2	1	1	14	54	30	5	173	150	47	27	9	8	22	25	14	5	9	9	53	26	60
CH334	C4.9	000_0.1% Tw80	52	41	53	88	96	84	83	77	76	78	66	72	62	71	40	58	20	17	24	10	14	10	18	18	15	13	9	10	9	11	20	5	7	0	0	1	3	4	12	9	5	5	21	18	28	32	21
CH335	C4.10	000_0.1% Tw80	41	69	90	97	137	99	92	120	108	87	72	72	95	91	116	134	96	77	58	81	30	24	66	7	36	28	29	8	2	3	1	3	0	0	0	0	2	4	0	1	5	3	10	14	14	24	38
CH336	A4.11	002_300ug CBD pure	49	66	33	34	40	53	65	86	88	43	40	41	63	73	81	58	21	52	40	32	29	13	34	2	24	45	10	0	18	24	17	0	0	0	0	0	0	0	0	12	0	0	7	3	20	31	7
CH337	A4.12	002_300ug CBD pure	35	14	30	35	49	55	69	62	41	62	33	87	66	56	44	31	25	15	12	37	5	30	19	19	1	54	89	6	4	12	14	8	17	16	0	1	26	1	7	5	0	17	15	13	21	32	32
CH338	A4.13	002_300ug CBD pure	31	31	43	64	62	41	71	57	84	50	37	27	12	28	27	21	16	6	2	0	7	0	4	7	5	0	0	0	2	7	8	0	0	8	1	3	0	4	0	0	1	7	2	2	3	30	22
CH339	A4.14	002_300ug CBD pure	53	48	47	44	70	82	61	54	73	47	31	20	42	80	103	49	51	35	40	16	11	12	41	61	37	73	35	9	25	14	37	22	79	216	236	219	152	74	24	15	0	2	7	66	30	44	28
CH342	B4.10	001_vehicle emulsion	90	73	102	86	119	77	103	118	105	100	88	77	96	65	70	69	39	49	38	32	33	101	43	28	33	59	23	54	49	40	45	51	51	18	12	12	12	26	37	35	19	17	27	33	27	34	49
CH343	B4.11	001_vehicle emulsion	36	52	81	95	71	69	73	103	119	90	77	76	69	59	21	33	45	29	14	26	3	18	16	16	13	0	2	4	25	100	25	17	1	7	1	0	12	41	10	40	13	17	18	9	14	21	19
CH344	B4.12	001_vehicle emulsion	71	66	59	82	90	93	83	98	82	78	66	68	54	33	28	18	29	7	12	40	18	3	16	44	31	16	5	5	2	6	5	2	0	0	3	0	0	0	9	3	14	19	34	30	28	29	33
CH345	B4.13	001_vehicle emulsion	83	57	80	95	96	94	94	120	97	67	70	73	52	43	46	30	38	39	53	27	16	9	24	22	11	15	20	26	28	23	32	26	37	8	6	3	4	14	13	14	25	23	49	58	97	109	80
CH348	C4.11	000_0.1% Tw80	26	63	35	72	77	86	69	74	104	72	66	69	43	47	100	64	90	114	90	62	7	51	12	13	2	3	11	2	8	0	2	0	0	2	0	0	3	2	10	5	1	0	21	24	16	21	31
CH349	C4.12	000_0.1% Tw80	55	55	52	76	92	76	70	74	67	57	75	39	37	50	42	45	32	29	11	10	7	27	8	3	5	44	30	0	4	0	5	10	8	0	0	2	0	4	0	3	3	5	10	6	15	20	22
CH350	C4.13	000_0.1% Tw80	56	51	64	76	97	69	63	74	73	67	62	64	67	56	35	35	59	35	21	7	6	18	9	9	8	7	0	13	2	9	2	0	0	0	0	0	0	5	0	8	3	4	24	14	15	19	25
CH351	C4.14	000_0.1% Tw80	73	73	85	107	104	122	126	135	131	146	137	110	121	114	111	156	113	130	64	53	53	57	38	104	52	55	81	92	41	55	84	72	50	35	13	8	14	25	31	27	27	25	32	33	39	75	30
CH353	A4.15	002_300ug CBD pure	68	29	46	61	51	33	49	44	42	47	78	66	105	94	131	79	59	46	48	26	13	27	97	25	14	20	19	10	61	90	41	101	14	4	2	15	0	2	54	3	19	17	26	23	54	56	86
CH354	A4.16	002_300ug CBD pure	80	59	29	56	51	58	71	73	54	61	63	105	86	64	60	53	76	120	51	52	41	53	44	36	37	51	46	71	64	59	64	70	66	27	18	11	29	19	23	31	25	22	40	48	54	70	110
CH359	B4.14	001_vehicle emulsion	69	74	102	83	78	102	129	97	125	85	64	93	60	35	120	36	12	29	36	28	65	167	65	15	23	82	63	110	60	77	14	13	17	7	10	6	3	9	0	6	13	16	24	91	46	50	37
CH360	B4.15	001_vehicle emulsion	51	76	85	65	109	110	108	117	93	73	61	61	51	66	40	54	41	45	28	36	53	66	19	32	10	4	7	6	2	3	7	10	1	160	237	218	210	138	119	80	32	49	65	136	120	111	144
CH365	C4.15	000_0.1% Tw80	53	88	108	69	94	88	75	67	92	90	80	103	74	103	109	84	38	25	23	19	24	32	55	24	27	18	16	23	19	34	33	38	30	7	14	10	6	10	26	27	51	73	122	146	153	139	141
CH366	C4.16	000_0.1% Tw80	62	84	90	106	114	120	107	98	128	99	112	79	83	52	57	44	54	26	19	23	24	18	15	16	16	29	19	59	23	28	35	31	28	11	12	5	8	11	18	27	34	36	63	105	71	86	121
[truncated: 90 more columns]

## Sheet: wDAT ex2 tR
DATE:	2023-11-10 15:24:08
FILE:	C:\Software\WMicrotracker One\wmicrotracker_w8_v30api\wmicrotracker\wmicrotracker\p00030\20231107_1845
SUBPROJECT:	2023 1107-10 wDAT extract300-750 TwVC3 ex2 tR
<<<<<< Group Activity: Average Activity Counts per Data Interval>>>>>>
Group/Time[m]	30	60	90	120	150	180	210	240	270	300	330	360	390	420	450	480	510	540	570	600	630	660	690	720	750	780	810	840	870	900	930	960	990	1020	1050	1080	1110	1140	1170	1200	1230	1260	1290	1320	1350	1380	1410	1440	1470
0.1%Tw80	50	56	64	67	72	74	77	78	78	78	75	73	70	63	54	50	49	45	36	30	27	30	27	27	17	18	21	22	16	19	21	13	14	5	5	4	7	7	12	19	26	27	31	33	33	40	41	41	39
VCe	40	48	60	62	66	67	76	76	75	72	71	62	58	52	43	38	33	25	24	19	19	20	21	20	16	18	24	28	19	17	14	8	10	5	10	10	12	11	13	12	13	17	18	25	28	36	36	34	38
300ug CBDex	36	41	38	48	46	46	54	52	51	46	48	50	44	46	42	32	35	30	32	28	26	24	26	26	26	27	23	22	19	24	21	22	23	20	20	15	12	9	10	10	14	12	16	26	28	44	38	40	50
500ug CBDex	36	30	34	39	34	34	39	38	38	37	38	32	31	35	36	34	34	32	29	30	25	26	28	26	21	24	27	24	20	15	19	16	22	18	24	22	18	18	18	14	12	12	14	20	22	30	26	24	28
750ug CBDex	37	26	31	39	28	28	30	31	31	30	34	31	33	30	31	33	32	32	37	29	28	31	28	23	20	23	29	29	29	31	28	31	34	27	22	20	17	15	19	18	15	13	15	18	18	26	25	25	31
Time	1.5	2	2.5	3	3.5	4	4.5	5	5.5	6	6.5	7	7.5	8	8.5	9	9.5	10	10.5	11	11.5	12	12.5	13	13.5	14	14.5	15	15.5	16	16.5	17	17.5	18	18.5	19	19.5	20	20.5	21	21.5	22	22.5	23	23.5	24	24.5	25	25.5
<<<<<< Group Activity: Standard Error >>>>>>
Group/Time[m]	30	60	90	120	150	180	210	240	270	300	330	360	390	420	450	480	510	540	570	600	630	660	690	720	750	780	810	840	870	900	930	960	990	1020	1050	1080	1110	1140	1170	1200	1230	1260	1290	1320	1350	1380	1410	1440	1470
000_0.1%Tw80	5.2	3.5	0.6	1.2	2.9	4.6	4.6	4	3.5	4	5.2	1.7	2.3	5.2	4.6	5.2	3.5	6.4	7.5	8.1	8.7	8.7	5.8	6.9	5.8	6.4	5.8	3.5	3.5	4	3.5	4	4	0.6	2.3	0.6	0.6	0.6	3.5	1.7	5.2	4.6	2.9	2.3	2.3	2.3	3.5	5.2	6.9
001_VCe	5.7	6.4	7.8	5.7	6.4	4.9	10.6	6.4	4.2	7.8	7.1	6.4	5.7	0.7	4.9	0	0.7	4.9	0.7	0.7	4.9	8.5	7.8	5.7	3.5	4.2	1.4	8.5	9.2	4.9	2.8	2.8	1.4	2.1	1.4	2.8	4.2	2.1	2.1	1.4	0.7	4.2	4.2	2.8	1.4	0.7	3.5	0.7	2.8
002_300ug CBDex	2.8	0	0.7	7.8	0.7	8.5	8.5	4.2	5.7	4.2	0.7	4.9	3.5	0.7	1.4	0	0.7	0	2.8	4.2	4.9	1.4	0.7	0.7	2.8	2.1	4.2	5.7	4.9	4.2	2.1	2.8	2.1	2.8	2.8	0.7	4.2	5.7	4.2	4.2	4.2	1.4	3.5	6.4	3.5	8.5	0.7	2.1	4.2
003_500ug CBDex	2.1	2.1	6.4	4.2	1.4	2.8	0.7	1.4	0.7	7.1	4.2	7.8	2.8	4.2	4.9	4.2	4.2	5.7	0.7	8.5	7.8	3.5	2.8	0.7	7.1	5.7	4.9	3.5	0.7	0	4.2	0.7	0.7	1.4	1.4	4.2	2.8	4.2	5.7	5.7	1.4	1.4	4.2	1.4	3.5	4.2	4.2	6.4	7.8
004_750ug CBDex	4.6	1.2	1.2	1.7	4	5.2	3.5	4	5.2	3.5	4	4.6	4	3.5	4.6	5.8	3.5	3.5	4.6	5.8	7.5	7.5	5.2	1.7	4.6	6.4	8.1	5.2	6.4	4.6	4	6.9	2.3	4	5.8	4.6	5.2	4	2.3	5.2	5.2	2.9	4.6	3.5	2.9	4	1.7	5.8	6.4
<<<<<< Group Activity: Number of wells/group >>>>>>
Group/Time[m]	30	60	90	120	150	180	210	240	270	300	330	360	390	420	450	480	510	540	570	600	630	660	690	720	750	780	810	840	870	900	930	960	990	1020	1050	1080	1110	1140	1170	1200	1230	1260	1290	1320	1350	1380	1410	1440	1470
000_0.1%Tw80	3	3	3	3	3	3	3	3	3	3	3	3	3	3	3	3	3	3	3	3	3	3	3	3	3	3	3	3	3	3	3	3	3	3	3	3	3	3	3	3	3	3	3	3	3	3	3	3	3
001_VCe	2	2	2	2	2	2	2	2	2	2	2	2	2	2	2	2	2	2	2	2	2	2	2	2	2	2	2	2	2	2	2	2	2	2	2	2	2	2	2	2	2	2	2	2	2	2	2	2	2
002_300ug CBDex	2	2	2	2	2	2	2	2	2	2	2	2	2	2	2	2	2	2	2	2	2	2	2	2	2	2	2	2	2	2	2	2	2	2	2	2	2	2	2	2	2	2	2	2	2	2	2	2	2
003_500ug CBDex	2	2	2	2	2	2	2	2	2	2	2	2	2	2	2	2	2	2	2	2	2	2	2	2	2	2	2	2	2	2	2	2	2	2	2	2	2	2	2	2	2	2	2	2	2	2	2	2	2
004_750ug CBDex	3	3	3	3	3	3	3	3	3	3	3	3	3	3	3	3	3	3	3	3	3	3	3	3	3	3	3	3	3	3	3	3	3	3	3	3	3	3	3	3	3	3	3	3	3	3	3	3	3
<<<<<< Number of Samples per Acquisition Interval [1unit=500values] >>>>>>
Time[m]	30	60	90	120	150	180	210	240	270	300	330	360	390	420	450	480	510	540	570	600	630	660	690	720	750	780	810	840	870	900	930	960	990	1020	1050	1080	1110	1140	1170	1200	1230	1260	1290	1320	1350	1380	1410	1440	1470
#Samples	30	30	30	30	30	30	30	30	30	30	30	30	30	30	30	30	30	30	30	30	30	30	30	30	30	30	30	30	30	30	30	30	30	30	30	30	30	30	30	30	30	30	30	30	30	30	30	30	30
<<<<<< Average Temperature [°C] >>>>>>
Time[m]	30	60	90	120	150	180	210	240	270	300	330	360	390	420	450	480	510	540	570	600	630	660	690	720	750	780	810	840	870	900	930	960	990	1020	1050	1080	1110	1140	1170	1200	1230	1260	1290	1320	1350	1380	1410	1440	1470
Temp[°C]	22.8	22.8	22.8	22.8	22.8	22.6	22.6	22.6	22.8	22.6	22.6	22.6	22.6	22.6	22.6	22.6	22.6	22.6	22.6	22.6	22.6	22.6	22.6	22.6	22.6	22.6	22.6	22.6	22.6	22.6	22.6	22.6	22.6	22.6	22.6	22.6	22.6	22.6	22.6	22.6	22.6	22.6	22.6	22.6	22.6	22.6	22.6	22.6	22.6
<<<<<< Well Activity >>>>>>
Well	Group/Time[m]	30	60	90	120	150	180	210	240	270	300	330	360	390	420	450	480	510	540	570	600	630	660	690	720	750	780	810	840	870	900	930	960	990	1020	1050	1080	1110	1140	1170	1200	1230	1260	1290	1320	1350	1380	1410	1440
A1	004_750ug CBDex	35	28	29	39	23	20	24	24	22	23	27	21	25	24	22	21	25	26	31	20	14	16	18	21	12	11	13	19	25	31	34	25	33	19	11	11	7	9	15	12	12	10	8	13	15	22	26	22
B1	003_500ug CBDex	38	32	41	43	32	31	38	36	38	30	33	25	28	31	31	30	29	26	28	21	17	23	25	26	14	18	22	20	19	15	15	15	23	19	25	17	16	14	12	9	11	11	10	18	19	34	30	31
C1	002_300ug CBDex	33	41	38	41	46	38	46	47	45	42	48	45	40	45	41	32	36	30	29	33	31	22	26	27	24	29	19	16	14	19	19	24	25	22	22	14	8	3	5	5	10	11	12	19	25	36	37	38
A2	000_0.1%Tw80	47	51	64	68	68	75	75	76	76	73	69	71	66	54	45	41	42	32	22	14	11	15	16	14	7	12	17	22	11	11	14	10	8	4	2	4	8	7	10	17	24	26	32	35	33	36	35	31
B2	004_750ug CBDex	45	26	33	42	36	37	32	38	40	31	35	36	37	33	36	39	36	32	35	28	29	38	35	27	22	32	37	32	20	23	20	23	31	28	31	25	20	15	22	28	25	18	24	24	24	34	27	36
C2	003_500ug CBDex	34	28	28	35	35	36	40	39	37	44	42	40	34	39	41	38	38	37	30	38	33	30	30	27	28	29	32	27	20	15	23	17	22	16	22	26	21	22	24	20	14	14	19	21	26	25	21	18
A3	001_VCe	34	42	52	57	59	62	65	70	71	64	64	56	52	52	48	38	32	20	25	18	14	11	13	14	12	14	23	37	28	12	11	6	8	3	8	7	8	9	11	10	12	21	22	28	29	36	33	33
B3	000_0.1%Tw80	60	63	65	68	78	81	85	86	85	86	85	77	70	63	57	49	53	54	48	40	40	32	34	29	18	11	13	17	14	24	25	8	21	5	3	4	7	7	7	18	18	20	25	35	36	44	42	49
C3	004_750ug CBDex	30	25	31	37	26	27	35	30	30	35	41	35	36	34	35	38	36	37	46	40	40	39	30	22	27	27	36	36	41	39	31	44	38	33	24	25	23	22	19	14	9	10	13	16	15	21	22	16
A4	002_300ug CBDex	38	41	39	56	47	55	63	56	57	51	49	55	47	47	44	32	34	30	34	24	21	25	25	26	29	25	27	27	24	28	23	19	21	17	17	16	17	15	14	14	18	14	19	32	32	53	38	42
B4	001_VCe	46	55	67	68	72	72	86	83	79	80	78	69	64	53	38	38	34	30	24	20	24	28	29	26	19	22	26	20	10	22	16	11	11	7	11	13	17	13	15	13	14	13	14	22	26	37	40	35
C4	000_0.1%Tw80	43	54	64	65	71	66	70	73	74	76	71	71	73	71	60	59	53	48	38	35	30	44	31	37	26	30	32	28	22	22	23	21	14	5	9	5	6	6	18	22	36	36	35	28	29	41	47	42
<<<<<< Channel Activity >>>>>>
Channel	Well	Group/Time[m]	30	60	90	120	150	180	210	240	270	300	330	360	390	420	450	480	510	540	570	600	630	660	690	720	750	780	810	840	870	900	930	960	990	1020	1050	1080	1110	1140	1170	1200	1230	1260	1290	1320	1350	1380	1410
CH17	A1.0	004_750ug CBDex	54	60	25	36	15	17	8	6	13	0	7	12	7	4	28	2	16	18	6	10	0	2	6	4	0	1	0	3	0	0	0	5	29	0	0	0	12	0	0	0	0	0	0	9	0	0	0
CH18	A1.1	004_750ug CBDex	59	45	83	61	19	14	7	10	2	3	28	13	28	15	34	18	12	29	96	5	26	6	6	12	4	16	11	14	87	72	33	16	26	5	3	5	0	3	5	6	7	3	39	22	58	47	47
CH23	B1.0	003_500ug CBDex	24	44	30	44	39	29	44	28	20	23	3	5	11	9	8	24	12	8	4	0	0	2	2	0	10	7	0	4	2	1	0	0	0	0	0	0	0	0	0	0	0	0	1	4	7	6	6
CH24	B1.1	003_500ug CBDex	9	9	25	26	33	9	12	7	7	8	10	10	15	16	8	4	13	37	28	20	13	17	2	5	11	6	8	5	4	8	7	3	5	2	0	1	0	6	2	0	0	2	0	5	6	15	6
CH29	C1.0	002_300ug CBDex	33	55	51	52	43	41	40	67	55	50	43	75	36	33	33	25	26	16	6	18	0	18	1	8	7	0	0	2	15	6	2	4	13	60	33	12	0	0	0	19	31	2	3	8	2	10	9
CH30	C1.1	002_300ug CBDex	48	52	63	71	78	45	43	38	40	26	20	19	6	41	13	8	27	34	13	81	82	32	24	18	75	156	6	49	68	79	34	123	74	2	2	1	0	4	4	5	21	4	3	10	28	50	67
CH32	A1.2	004_750ug CBDex	61	25	15	37	25	25	22	20	5	15	17	4	25	28	5	16	9	40	38	10	0	6	0	3	0	8	25	0	1	1	1	0	0	25	17	10	13	37	44	2	1	2	0	2	3	14	2
CH33	A1.3	004_750ug CBDex	30	60	32	44	47	49	57	37	3	29	9	13	10	30	4	2	6	5	5	22	3	2	4	14	0	3	20	13	1	3	11	2	0	0	0	3	0	0	0	7	0	0	0	5	6	11	7
CH34	A1.4	004_750ug CBDex	20	11	24	41	26	13	13	23	10	11	7	7	4	8	7	6	1	1	2	1	2	10	1	3	8	5	4	5	14	14	11	14	21	5	4	13	23	11	10	3	4	7	3	21	31	25	28
CH35	A1.5	004_750ug CBDex	30	18	12	26	12	12	23	14	37	30	37	27	10	16	17	13	43	34	29	12	6	12	4	7	7	4	10	18	61	50	11	11	15	0	1	2	9	29	10	21	51	39	12	10	9	9	12
CH38	B1.2	003_500ug CBDex	25	18	44	60	32	20	58	13	19	9	43	50	39	82	28	60	18	53	39	39	30	23	32	34	12	72	15	44	34	20	5	44	12	11	6	6	3	3	0	0	7	0	0	1	0	2	1
CH39	B1.3	003_500ug CBDex	41	38	28	42	48	18	27	53	29	17	19	13	12	36	15	15	24	19	24	9	1	32	31	13	14	8	24	13	14	7	15	18	1	1	0	0	0	0	1	4	0	6	16	40	1	20	27
CH40	B1.4	003_500ug CBDex	36	25	41	50	40	47	35	36	19	26	20	18	9	15	23	38	8	30	17	7	17	19	26	2	0	17	17	21	16	27	13	23	44	15	15	1	0	5	12	10	6	5	1	5	10	15	20
CH41	B1.5	003_500ug CBDex	47	35	47	55	15	51	36	45	39	44	37	7	21	28	14	21	34	21	21	10	1	14	6	10	1	20	84	40	39	38	7	44	50	24	22	10	0	16	7	0	0	0	4	29	16	12	5
CH44	C1.2	002_300ug CBDex	48	43	57	42	37	13	6	9	3	12	16	4	4	36	4	26	0	6	1	4	3	1	0	0	2	3	0	10	1	0	0	0	0	0	0	0	0	0	0	0	0	0	1	1	1	1	1
CH45	C1.3	002_300ug CBDex	27	49	32	25	48	65	36	33	36	34	24	52	34	29	28	19	37	22	24	13	9	1	8	5	9	2	8	6	4	9	9	7	15	0	4	1	0	1	1	2	3	1	5	9	16	17	5
CH46	C1.4	002_300ug CBDex	25	45	46	49	49	31	70	32	31	33	40	16	30	5	14	15	24	14	5	3	7	22	0	11	10	15	10	2	0	1	6	0	3	12	0	1	2	1	0	0	1	0	2	5	7	13	9
CH47	C1.5	002_300ug CBDex	52	38	35	30	68	60	60	48	40	30	43	33	27	38	35	16	52	22	68	18	68	77	50	110	159	104	70	14	14	11	17	17	23	7	7	2	0	7	5	2	6	13	10	20	20	36	31
CH48	A1.6	004_750ug CBDex	53	36	28	61	54	54	19	31	37	37	24	31	70	50	19	63	82	43	21	24	25	23	6	14	12	52	0	2	3	5	17	8	0	0	5	2	0	7	0	0	0	0	5	4	5	19	12
CH49	A1.7	004_750ug CBDex	46	19	23	28	18	28	24	47	17	22	4	10	2	13	10	13	7	13	6	0	10	10	0	9	6	1	7	2	3	6	7	16	18	0	0	1	0	0	3	2	0	1	1	5	8	12	6
CH50	A1.8	004_750ug CBDex	25	11	17	58	20	10	36	30	47	18	30	25	26	17	11	22	8	8	43	13	23	6	9	15	10	2	0	5	6	27	12	4	13	13	0	0	0	3	3	1	0	0	0	27	2	10	3
CH51	A1.9	004_750ug CBDex	27	17	9	32	16	12	31	11	39	35	52	53	17	12	10	30	22	26	21	28	7	32	34	22	5	2	4	1	8	50	78	10	1	2	5	15	13	0	1	0	0	4	10	3	4	10	5
CH52	A1.10	004_750ug CBDex	2	5	5	5	5	3	2	0	0	0	0	0	1	0	0	0	2	0	1	2	0	0	1	2	0	4	5	0	3	2	6	1	3	0	0	1	0	0	0	1	1	1	0	5	4	2	8
CH54	B1.6	003_500ug CBDex	50	66	31	27	22	1	2	2	0	11	6	4	0	3	16	22	2	0	1	0	1	0	0	0	0	0	0	0	0	0	0	0	0	0	0	0	0	0	0	0	0	0	0	1	0	0	0
CH55	B1.7	003_500ug CBDex	67	39	50	43	51	63	34	25	48	51	53	27	52	33	58	46	72	48	33	39	30	50	17	8	9	5	26	10	0	0	3	0	16	0	0	2	0	6	0	0	12	2	0	5	23	106	58
CH56	B1.8	003_500ug CBDex	37	64	23	51	26	26	71	61	56	35	38	20	40	29	42	27	30	22	26	18	14	24	12	57	43	29	37	44	101	16	13	12	83	134	160	74	8	0	0	2	0	3	3	7	4	13	6
CH57	B1.9	003_500ug CBDex	42	15	25	50	35	21	48	54	47	30	32	16	15	28	30	26	20	27	29	11	13	17	34	2	3	12	7	5	1	2	16	7	4	2	1	0	7	3	0	0	7	1	4	15	10	12	15
CH59	C1.6	002_300ug CBDex	68	101	95	111	120	99	131	132	121	109	102	123	107	150	128	116	101	76	94	140	80	87	106	86	60	72	68	34	48	115	111	134	157	149	182	124	83	28	49	35	51	20	30	42	44	84	58
CH60	C1.7	002_300ug CBDex	58	32	23	37	56	38	70	55	54	58	56	57	73	51	56	58	49	43	11	49	33	11	21	49	12	21	18	8	0	3	17	5	5	0	2	0	0	0	0	0	3	3	23	4	29	20	37
CH61	C1.8	002_300ug CBDex	44	33	23	23	48	35	56	55	67	47	42	48	46	38	15	33	30	24	31	22	17	12	15	3	5	20	30	14	34	21	2	15	57	79	69	26	7	4	6	0	0	5	1	7	3	24	28
CH62	C1.9	002_300ug CBDex	29	39	45	29	43	27	21	49	28	18	18	25	30	28	36	5	26	35	11	12	10	8	5	4	2	10	24	13	5	8	18	13	14	12	4	4	1	0	3	1	4	4	9	21	18	27	13
CH63	C1.10	002_300ug CBDex	17	23	17	37	19	11	35	34	28	28	31	32	15	24	29	18	24	35	32	19	44	27	64	28	16	12	19	13	1	8	32	24	8	6	6	5	3	0	2	0	5	2	34	15	18	31	27
CH64	A1.11	004_750ug CBDex	42	51	65	47	44	13	14	4	3	4	3	8	0	9	6	12	38	17	5	6	9	6	2	1	6	0	2	0	0	0	61	92	101	38	76	99	38	42	78	54	55	59	61	61	60	125	128
CH65	A1.12	004_750ug CBDex	32	27	48	47	28	13	47	89	30	38	51	42	62	32	46	37	39	94	93	61	42	68	53	91	41	30	76	150	162	143	100	95	225	151	37	24	2	7	79	57	65	39	1	12	12	19	40
CH66	A1.13	004_750ug CBDex	41	24	30	36	23	24	9	17	43	43	40	28	40	35	27	53	78	23	51	69	36	20	91	61	22	12	10	47	22	49	17	3	2	4	5	2	0	0	1	2	1	10	0	7	10	11	16
CH67	A1.14	004_750ug CBDex	28	19	23	47	18	12	37	5	34	33	81	27	53	58	75	31	33	26	35	23	24	24	13	16	62	27	21	33	17	75	34	24	26	38	12	6	0	0	0	0	2	5	2	3	8	36	51
CH70	B1.10	003_500ug CBDex	43	47	37	38	31	4	7	12	17	4	0	1	0	3	0	0	0	0	2	0	0	0	0	0	0	0	0	0	0	0	0	0	0	1	0	0	0	0	0	0	0	0	0	0	1	1	1
CH71	B1.11	003_500ug CBDex	34	27	36	46	32	35	45	44	43	67	67	46	59	49	62	49	50	32	41	72	49	21	28	23	11	3	21	24	6	4	8	3	2	2	25	14	0	2	3	0	6	0	11	18	3	22	27
CH72	B1.12	003_500ug CBDex	35	16	34	33	22	33	29	52	34	28	38	28	29	36	25	18	32	16	24	6	5	19	14	3	12	8	26	8	3	2	3	0	5	3	18	5	25	38	43	27	9	4	6	7	14	47	9
CH73	B1.13	003_500ug CBDex	49	27	113	57	38	79	80	71	96	49	85	82	52	43	83	36	70	33	83	56	58	105	88	140	71	64	31	29	28	41	34	33	61	9	11	5	8	10	61	18	9	17	22	33	40	82	78
CH76	C1.11	002_300ug CBDex	19	15	17	11	1	1	0	1	0	9	87	68	61	54	84	58	51	57	58	88	55	33	30	34	4	37	27	47	18	12	26	19	10	25	2	1	0	0	6	2	12	3	30	48	83	122	118
CH77	C1.12	002_300ug CBDex	25	42	33	57	39	48	47	67	52	81	100	75	66	62	56	35	20	35	24	18	26	8	16	8	11	8	17	11	10	1	6	0	3	0	5	0	0	0	0	0	0	12	4	14	20	26	16
CH78	C1.13	002_300ug CBDex	20	48	51	44	51	34	65	59	46	44	65	43	44	54	48	26	31	26	20	12	17	3	14	24	2	3	14	5	0	1	1	14	0	0	0	0	0	0	3	9	9	55	26	20	10	31	48
CH79	C1.14	002_300ug CBDex	5	13	13	17	19	11	11	16	37	37	38	25	29	15	32	18	24	19	16	19	20	7	6	25	0	2	13	8	8	15	11	2	1	0	4	0	0	0	2	0	2	21	10	26	19	34	29
CH81	A1.15	004_750ug CBDex	41	48	54	55	22	41	51	57	50	60	68	52	63	67	62	22	30	65	62	38	17	34	63	75	21	10	14	23	26	31	157	109	78	38	22	9	2	8	19	41	17	3	0	7	29	10	54
CH82	A1.16	004_750ug CBDex	2	5	7	7	3	5	4	2	5	6	2	7	4	11	16	16	7	5	16	14	7	14	14	10	8	9	11	15	12	3	25	19	7	0	1	0	0	12	2	5	3	2	1	11	11	12	22
CH87	B1.14	003_500ug CBDex	62	35	76	53	32	48	71	65	120	61	67	53	73	60	61	60	43	48	30	29	27	11	66	97	29	23	53	33	45	39	106	48	48	61	96	108	114	119	56	86	118	135	83	116	159	154	182
CH88	B1.15	003_500ug CBDex	14	6	16	13	8	7	8	16	12	15	16	21	28	19	25	29	30	18	42	19	13	14	36	14	6	10	2	33	12	37	15	12	30	43	42	51	92	15	4	1	1	0	2	6	14	33	34
CH93	C1.15	002_300ug CBDex	35	74	46	56	59	76	87	111	114	86	75	75	72	90	81	58	81	39	85	36	50	23	82	42	42	22	0	42	19	34	37	36	44	20	47	64	43	1	0	7	23	35	15	57	92	80	130
CH94	C1.16	002_300ug CBDex	1	1	5	6	5	4	5	0	5	10	9	3	3	9	6	7	1	1	0	1	5	1	8	5	0	0	2	1	0	2	0	0	0	1	0	0	1	0	0	2	6	6	5	10	12	3	4
CH113	A2.0	000_0.1%Tw80	55	60	40	51	42	24	17	19	14	24	18	16	5	12	3	5	4	12	8	2	4	0	0	0	0	0	0	19	16	0	0	0	0	3	1	0	2	3	1	0	1	0	2	2	0	1	1
CH114	A2.1	000_0.1%Tw80	67	78	89	75	93	94	114	92	102	104	80	81	125	84	56	49	96	26	23	1	8	11	47	50	3	3	7	4	12	4	10	2	9	8	1	3	1	2	10	15	3	41	14	26	14	31	22
CH115	A2.2	000_0.1%Tw80	91	102	95	139	107	118	114	94	85	89	105	103	97	77	92	56	47	35	34	18	31	61	21	5	5	6	44	95	12	30	7	4	10	1	0	9	2	5	7	35	22	14	21	18	31	32	17
CH118	B2.0	004_750ug CBDex	44	29	29	43	80	57	41	47	82	17	15	17	10	8	7	6	32	14	14	14	11	19	37	7	1	9	0	2	0	2	1	0	2	0	9	10	0	0	0	0	2	0	5	3	12	41	14
CH119	B2.1	004_750ug CBDex	46	12	38	55	44	38	16	7	48	76	73	75	34	19	72	66	13	47	70	53	55	34	18	5	17	47	45	14	14	44	6	4	8	7	0	0	2	0	4	21	17	21	23	25	7	10	4
CH120	B2.2	004_750ug CBDex	32	21	21	49	51	35	22	34	24	34	38	28	74	20	19	24	31	39	30	8	8	22	16	12	10	14	22	92	18	13	45	22	17	0	0	0	0	0	0	0	0	0	1	2	1	4	3
CH121	B2.3	004_750ug CBDex	83	45	28	41	24	66	59	87	56	8	19	15	12	9	0	52	37	9	15	4	0	6	2	19	16	34	79	4	1	17	17	0	1	0	0	0	0	0	0	4	0	5	18	26	30	27	6
CH124	C2.0	003_500ug CBDex	24	18	1	3	1	0	0	0	0	0	0	0	0	0	0	0	0	0	0	0	0	0	0	0	0	0	0	0	0	0	0	0	0	0	0	0	0	0	0	0	0	0	0	0	0	1	0
CH125	C2.1	003_500ug CBDex	36	40	35	39	27	23	23	22	28	30	39	32	20	23	25	18	21	24	34	61	62	16	16	11	22	13	7	5	1	2	3	2	9	2	12	4	0	6	5	3	2	2	35	10	36	13	7
CH126	C2.2	003_500ug CBDex	35	22	17	25	31	12	6	23	45	19	47	25	9	6	12	36	21	26	24	56	16	4	34	45	42	19	14	1	14	6	13	24	23	0	8	1	0	2	3	0	11	9	7	4	17	8	7
CH128	A2.3	000_0.1%Tw80	59	43	46	63	53	57	76	63	103	77	77	72	79	52	42	25	25	30	10	0	9	2	1	2	0	1	1	6	1	1	6	2	7	0	0	0	0	4	1	2	2	6	9	12	15	17	21
CH129	A2.4	000_0.1%Tw80	58	50	52	64	52	78	68	65	80	53	65	42	67	45	58	13	21	5	10	4	5	0	0	1	0	5	0	0	0	1	6	2	7	0	0	0	0	1	3	3	22	3	17	13	30	10	31
CH130	A2.5	000_0.1%Tw80	53	46	66	88	92	101	78	100	104	73	68	81	60	39	24	37	42	9	10	11	1	4	4	2	4	0	0	19	0	0	3	3	0	0	0	10	0	0	3	2	11	4	26	22	18	16	15
CH131	A2.6	000_0.1%Tw80	37	61	84	92	79	77	72	89	80	82	63	86	74	47	45	59	54	24	27	20	6	13	11	2	8	3	3	7	4	2	5	0	0	0	0	2	7	0	3	0	12	18	22	10	14	21	17
CH132	A2.7	000_0.1%Tw80	3	0	8	2	4	7	4	6	3	3	10	3	1	5	2	3	1	3	2	0	0	0	0	3	6	5	4	3	0	0	2	1	0	4	6	8	10	8	2	2	4	4	3	4	7	5	11
CH134	B2.4	004_750ug CBDex	46	30	31	43	19	34	40	36	4	23	32	23	62	65	35	15	38	15	12	32	23	10	23	2	9	54	49	49	39	29	6	8	45	29	18	7	60	40	29	28	31	39	5	30	2	23	15
CH135	B2.5	004_750ug CBDex	53	43	38	64	49	67	61	51	55	31	20	27	32	11	48	55	6	12	30	13	13	30	17	53	13	17	10	6	4	8	6	4	51	6	7	16	13	11	2	2	10	3	26	3	27	50	35
CH136	B2.6	004_750ug CBDex	46	32	45	39	37	46	31	23	35	38	34	43	34	73	33	41	63	23	73	33	23	47	65	32	15	10	17	14	15	17	22	89	94	75	98	94	18	16	38	39	41	28	17	2	8	13	21
CH137	B2.7	004_750ug CBDex	29	22	36	40	31	12	28	59	28	11	27	29	7	10	88	84	51	26	29	45	92	69	39	5	10	77	66	16	10	29	57	24	49	64	10	6	25	29	41	46	3	2	3	12	5	17	9
CH139	C2.3	003_500ug CBDex	44	37	41	81	49	65	51	65	71	77	75	70	75	66	69	88	62	56	54	57	51	25	69	34	57	21	46	35	8	18	13	5	19	4	1	14	0	60	1	0	0	11	18	3	10	9	5
CH140	C2.4	003_500ug CBDex	50	40	45	55	41	39	68	74	61	78	66	77	47	60	36	34	48	69	60	65	53	50	62	61	50	34	23	12	12	27	57	38	0	21	81	173	192	175	202	178	154	118	133	96	29	37	30
CH141	C2.5	003_500ug CBDex	37	21	32	28	25	40	33	35	45	64	65	32	22	53	40	51	64	14	25	25	20	20	12	29	16	8	7	7	12	4	7	6	6	9	8	4	33	12	4	2	7	10	15	14	6	15	26
CH142	C2.6	003_500ug CBDex	28	22	17	36	23	23	45	44	40	26	22	46	32	45	35	13	46	40	59	42	23	4	0	27	26	21	36	50	19	12	2	0	18	11	2	0	0	13	0	0	2	4	4	11	23	9	23
CH143	C2.7	003_500ug CBDex	14	7	19	31	24	26	21	10	5	26	25	27	25	38	23	20	23	9	11	26	24	36	34	10	6	18	23	18	11	10	22	15	34	23	4	22	0	5	5	4	5	8	9	15	16	28	12
CH144	A2.8	000_0.1%Tw80	33	36	39	38	62	75	72	86	64	88	81	90	66	43	32	44	38	26	2	10	2	4	3	2	0	3	0	0	0	0	3	0	0	0	0	0	0	0	1	0	7	12	16	8	32	24	16
CH145	A2.9	000_0.1%Tw80	47	47	45	50	82	73	63	75	81	66	78	85	58	56	39	29	17	15	12	13	6	2	3	1	8	10	0	0	0	0	2	0	0	0	0	5	1	1	13	6	1	7	9	43	15	16	25
CH146	A2.10	000_0.1%Tw80	47	50	61	54	68	82	95	77	75	105	49	74	55	61	38	21	21	21	4	7	1	1	3	8	2	3	9	1	0	3	3	0	1	0	0	1	0	0	0	11	12	15	27	14	32	19	18
CH147	A2.11	000_0.1%Tw80	37	51	71	56	73	71	75	86	103	61	59	54	56	49	45	39	37	18	18	20	8	14	15	19	5	2	2	2	3	4	4	7	0	0	6	0	0	9	8	15	34	33	51	54	29	46	34
CH148	A2.12	000_0.1%Tw80	14	16	34	34	28	42	41	40	29	31	34	27	35	44	46	51	47	58	38	23	31	31	27	44	46	78	72	96	86	69	72	60	40	38	17	26	29	57	71	72	101	112	110	122	97	104	106
CH150	B2.8	004_750ug CBDex	62	36	37	36	64	50	34	45	90	35	46	39	20	47	48	37	63	49	7	15	10	36	58	47	19	6	36	23	41	43	4	27	42	10	2	13	0	2	1	63	87	113	94	92	1	21	28
CH151	B2.9	004_750ug CBDex	33	14	39	58	30	16	22	13	23	28	53	44	24	27	25	21	20	25	44	25	23	8	45	23	9	25	15	46	52	34	40	20	35	1	12	2	0	0	7	0	8	0	0	4	8	7	8
CH152	B2.10	004_750ug CBDex	54	37	62	35	24	23	29	34	36	35	56	56	71	57	53	41	70	31	25	23	26	45	45	33	50	57	16	20	0	0	18	32	51	99	86	44	0	12	2	39	35	24	94	134	131	105	29
CH153	B2.11	004_750ug CBDex	51	17	24	33	18	26	20	6	18	22	19	18	32	49	20	24	9	19	29	19	44	22	12	34	24	24	24	59	5	7	7	2	0	3	21	3	5	0	0	0	0	0	41	6	4	22	38
CH155	C2.8	003_500ug CBDex	58	80	66	42	77	80	60	88	88	128	106	92	83	82	106	101	78	92	68	90	106	103	90	43	69	67	92	37	63	35	86	63	48	104	130	46	34	42	51	4	3	15	5	26	59	43	53
CH156	C2.9	003_500ug CBDex	23	20	22	9	19	18	30	19	21	22	24	35	27	37	35	21	20	22	30	17	16	14	17	17	15	9	26	24	11	13	4	6	8	2	2	2	0	0	0	0	4	3	2	13	7	25	12
CH157	C2.10	003_500ug CBDex	32	15	18	31	39	40	40	23	34	56	32	42	27	43	45	16	50	68	9	32	14	30	29	32	39	25	53	22	1	19	33	11	0	0	4	0	0	2	0	0	8	0	0	3	4	8	15
CH158	C2.11	003_500ug CBDex	31	19	26	34	48	19	28	20	32	46	40	40	33	44	28	45	51	25	15	6	31	27	16	22	22	63	12	21	27	11	12	18	8	2	0	1	3	0	1	17	5	2	44	7	12	15	13
CH159	C2.12	003_500ug CBDex	35	42	27	49	45	60	78	60	47	59	24	28	30	20	52	68	32	27	11	18	38	83	26	30	31	22	45	66	77	25	36	21	55	28	11	56	2	9	48	82	11	13	24	65	85	58	23
CH160	A2.13	000_0.1%Tw80	57	68	91	90	80	68	97	95	85	105	121	111	114	104	91	104	135	105	69	47	58	56	67	45	23	54	113	87	43	56	74	77	24	2	3	8	53	16	9	25	19	19	33	45	29	42	41
CH161	A2.14	000_0.1%Tw80	40	45	71	73	81	76	85	95	71	111	112	75	55	75	56	29	38	44	18	25	9	8	6	11	3	9	2	13	0	1	3	0	0	0	0	0	15	7	1	2	27	6	33	31	21	31	31
CH162	A2.15	000_0.1%Tw80	54	41	81	100	81	91	80	90	90	88	79	96	79	50	39	67	49	67	48	17	0	6	4	9	0	2	4	0	0	2	0	0	2	0	0	0	2	4	5	8	25	19	32	33	22	42	30
CH163	A2.16	000_0.1%Tw80	53	73	111	83	83	134	116	119	128	77	76	103	104	81	64	66	43	42	35	24	12	39	61	30	9	23	28	25	10	16	37	18	42	10	8	3	13	10	30	85	111	134	123	145	156	153	162
CH166	B2.12	004_750ug CBDex	63	13	33	30	39	65	11	79	44	61	63	81	105	54	59	91	64	50	68	103	70	140	111	95	47	58	102	61	40	25	40	73	30	105	161	143	119	76	196	175	124	15	13	16	76	64	72
CH167	B2.13	004_750ug CBDex	43	33	31	67	47	36	75	49	59	39	29	41	18	36	26	23	30	62	44	12	12	60	37	25	25	46	51	40	17	26	3	2	3	2	0	6	7	0	7	11	0	1	29	8	13	23	30
CH168	B2.14	004_750ug CBDex	31	19	23	23	21	12	14	35	28	19	19	27	38	32	23	19	27	56	21	20	24	25	12	11	50	18	7	17	26	11	8	12	23	16	39	2	9	0	1	0	1	5	0	11	8	19	54
CH169	B2.15	004_750ug CBDex	8	11	8	19	4	5	8	11	10	13	11	12	26	13	17	23	29	32	54	28	34	28	28	35	36	19	48	44	40	65	48	46	39	25	39	52	54	58	28	17	40	38	16	18	58	90	59
CH172	C2.13	003_500ug CBDex	63	36	64	72	103	120	147	131	49	54	65	83	68	58	91	76	68	87	58	100	58	59	73	43	39	69	52	40	37	49	87	70	122	47	97	117	84	43	71	24	26	15	12	32	89	100	77
CH173	C2.14	003_500ug CBDex	31	23	12	33	12	16	22	25	36	26	53	34	42	47	59	33	37	33	29	30	22	28	16	31	22	88	94	104	21	5	4	12	8	8	15	0	0	0	2	10	1	5	6	37	9	25	25
CH174	C2.15	003_500ug CBDex	25	24	27	27	20	20	22	12	23	28	33	20	35	28	27	23	16	22	8	11	8	6	8	16	4	5	10	18	10	11	14	4	14	1	1	1	5	2	2	0	1	15	10	27	22	30	16
CH175	C2.16	003_500ug CBDex	8	6	8	6	6	9	12	4	5	2	4	5	6	14	6	3	3	7	12	3	15	10	1	5	8	5	8	4	17	10	6	0	5	4	5	0	2	7	8	14	3	1	3	2	10	5	9
CH208	A3.0	001_VCe	77	39	42	54	59	62	63	80	91	58	71	86	89	88	118	73	40	44	25	25	24	42	24	25	15	19	48	11	9	7	11	14	23	2	3	10	1	8	5	6	3	7	15	26	11	23	10
CH209	A3.1	001_VCe	34	46	58	56	68	46	69	74	81	63	72	53	69	69	58	56	36	33	55	21	38	20	26	36	19	12	6	37	97	84	23	2	20	2	6	3	19	1	13	6	12	4	2	22	8	18	13
CH210	A3.2	001_VCe	25	42	66	63	57	48	66	75	67	47	56	64	70	33	41	27	53	25	23	9	3	8	2	23	17	8	21	157	193	29	10	0	0	5	41	27	9	15	50	18	29	6	7	7	5	31	9
CH211	A3.3	001_VCe	38	66	65	69	103	95	86	95	80	100	66	62	50	85	47	27	34	9	31	19	31	12	15	29	29	70	129	84	28	12	4	5	0	6	29	38	20	28	15	9	9	34	17	65	43	25	24
CH214	B3.0	000_0.1%Tw80	102	100	76	69	94	105	97	98	118	108	118	117	124	115	87	87	70	89	92	50	26	12	10	9	8	5	6	0	13	27	57	13	114	10	4	0	0	3	0	14	6	8	14	28	29	48	17
CH215	B3.1	000_0.1%Tw80	35	70	39	54	45	53	73	65	57	72	71	63	56	52	36	28	15	30	34	7	15	21	10	0	2	4	5	2	3	2	3	4	6	2	2	0	2	0	10	14	0	0	17	8	7	13	15
CH216	B3.2	000_0.1%Tw80	43	54	82	77	78	59	57	77	85	102	83	81	46	50	46	31	52	64	15	18	19	32	81	42	16	19	3	9	2	0	6	0	0	2	11	22	32	1	0	6	0	12	7	12	8	5	9
CH217	B3.3	000_0.1%Tw80	126	93	98	102	94	105	94	116	125	94	85	98	98	100	85	67	77	70	71	60	75	83	11	28	22	28	25	79	28	33	33	38	44	14	11	3	36	50	20	26	14	25	22	43	30	39	48
CH220	C3.0	004_750ug CBDex	51	48	44	65	60	44	46	35	46	41	35	36	56	72	30	15	17	52	41	61	10	28	26	21	30	14	15	113	150	117	54	20	1	27	33	8	22	27	11	2	3	12	1	5	10	25	18
CH221	C3.1	004_750ug CBDex	22	48	51	65	36	33	63	21	33	82	59	32	56	51	54	25	29	28	40	43	23	51	12	18	12	4	13	25	39	28	3	17	0	0	2	4	0	12	0	0	5	0	0	4	4	6	4
CH222	C3.2	004_750ug CBDex	48	22	34	32	11	40	43	34	15	15	39	33	40	34	18	27	15	11	19	25	40	35	12	4	29	7	16	14	1	4	16	92	7	2	16	0	11	17	165	151	25	22	14	24	9	20	23
CH223	C3.3	004_750ug CBDex	18	8	25	32	16	8	14	4	46	5	41	26	11	18	4	1	2	2	23	7	43	13	23	4	0	9	17	32	19	13	22	79	10	3	16	36	92	46	1	12	0	5	0	14	4	22	5
CH224	A3.4	001_VCe	29	20	23	36	30	45	42	55	64	75	72	50	46	39	31	23	33	9	0	16	0	7	29	3	14	0	3	0	0	0	0	0	0	0	0	0	0	5	0	2	1	1	1	9	6	14	2
CH225	A3.5	001_VCe	34	26	52	47	53	38	49	67	68	75	68	54	52	39	43	29	19	20	23	9	8	2	0	1	0	1	1	8	4	0	4	0	0	0	0	0	8	16	1	0	3	2	5	2	16	9	7
CH226	A3.6	001_VCe	38	44	59	72	86	87	95	73	65	70	85	49	47	44	53	44	29	8	19	15	6	12	2	4	4	3	2	7	6	4	10	1	0	0	0	2	10	2	3	21	0	19	6	12	17	16	33
CH227	A3.7	001_VCe	19	31	47	66	54	37	44	41	57	53	38	25	25	28	20	5	5	7	11	7	6	1	0	1	6	0	1	6	0	8	4	2	0	0	2	1	6	6	1	8	6	16	15	27	38	28	31
CH228	A3.8	001_VCe	3	13	28	24	31	36	25	25	27	16	26	28	10	20	38	21	27	22	10	24	5	12	5	1	2	2	3	2	0	1	2	6	1	5	1	2	7	5	10	24	27	43	47	53	56	93	60
CH230	B3.4	000_0.1%Tw80	71	61	53	42	66	75	95	92	100	101	105	82	74	71	53	59	19	45	13	11	5	3	5	0	2	1	0	24	15	13	7	0	0	0	0	4	10	0	21	38	24	3	10	18	6	27	20
CH231	B3.5	000_0.1%Tw80	48	53	60	70	86	79	79	103	103	92	103	74	78	67	79	52	43	37	20	18	22	5	54	20	9	1	8	9	2	7	9	3	7	0	1	4	0	1	2	4	6	12	19	26	24	24	18
CH232	B3.6	000_0.1%Tw80	53	66	47	61	64	79	98	72	68	81	97	59	68	64	53	41	53	18	36	26	10	19	1	1	5	0	9	9	0	4	4	0	19	0	0	0	2	1	1	5	2	4	12	14	13	21	20
CH233	B3.7	000_0.1%Tw80	57	62	67	84	83	105	96	110	89	86	86	78	61	63	54	47	62	45	49	30	25	10	10	15	9	5	7	7	8	4	39	0	3	3	0	0	2	3	0	15	5	26	26	41	61	48	36
CH235	C3.4	004_750ug CBDex	49	33	24	32	52	31	23	48	27	42	41	35	44	60	38	67	32	16	35	55	36	32	18	17	10	12	46	10	9	54	35	48	36	45	15	5	0	73	10	4	2	1	11	7	3	4	16
CH236	C3.5	004_750ug CBDex	20	28	34	47	24	31	54	48	53	54	44	59	53	15	47	31	57	37	54	43	45	52	45	27	62	51	67	43	95	43	20	19	4	0	8	1	8	9	3	0	13	0	0	9	6	8	2
CH237	C3.6	004_750ug CBDex	25	19	15	39	24	25	33	44	17	12	9	29	17	9	18	23	21	13	13	14	30	60	13	30	41	25	34	46	8	16	43	62	67	17	19	10	20	4	3	8	11	1	2	13	21	18	23
CH238	C3.7	004_750ug CBDex	25	19	17	31	19	12	22	21	11	17	19	20	23	27	9	22	31	23	9	0	14	7	4	3	4	4	9	7	0	0	27	21	7	9	0	6	3	4	0	0	0	0	2	2	7	11	7
CH239	C3.8	004_750ug CBDex	14	5	11	19	16	19	12	6	3	34	38	33	52	10	33	32	25	19	28	22	29	11	17	13	15	6	25	32	6	9	6	12	12	4	1	1	2	7	7	7	4	31	12	11	8	15	12
CH240	A3.9	001_VCe	47	66	68	49	50	48	62	75	86	78	71	82	72	77	54	76	43	26	36	29	7	15	7	15	1	19	0	8	0	5	8	1	0	0	0	0	0	0	0	1	4	0	8	7	8	9	16
CH241	A3.10	001_VCe	23	60	35	59	77	87	70	96	61	71	70	73	71	69	50	40	19	12	12	5	17	7	4	0	1	6	4	2	0	1	3	1	0	0	2	3	0	0	3	2	1	4	26	3	15	10	20
CH242	A3.11	001_VCe	17	29	51	40	44	69	76	83	90	59	47	51	42	37	37	33	16	12	14	1	11	7	26	10	7	9	1	2	1	4	7	0	0	0	0	0	0	2	2	5	6	26	12	11	16	18	10
CH243	A3.12	001_VCe	25	60	60	78	72	75	78	88	87	61	78	55	31	32	18	19	16	10	22	10	7	4	0	2	0	0	3	8	7	11	5	0	0	0	4	1	8	4	11	6	17	54	40	64	82	88	75
CH244	A3.13	001_VCe	2	3	8	9	1	3	6	3	2	1	2	6	3	5	1	2	2	2	2	0	1	2	1	1	3	4	7	5	12	6	12	6	5	10	14	14	23	29	37	20	51	31	31	33	30	47	47
CH246	B3.8	000_0.1%Tw80	49	80	83	65	94	92	104	93	83	97	85	68	80	65	72	86	104	93	62	122	71	20	17	60	13	2	8	0	0	0	2	0	7	0	0	0	0	0	2	50	60	5	16	18	3	18	35
CH247	B3.9	000_0.1%Tw80	46	35	52	61	58	80	53	72	75	68	85	53	46	57	56	39	47	63	24	29	47	8	35	1	3	2	5	2	0	8	6	24	13	0	0	0	0	7	1	6	4	20	4	20	32	17	27
CH248	B3.10	000_0.1%Tw80	41	33	53	50	68	73	87	92	69	68	52	70	48	23	35	24	12	24	20	7	4	4	9	13	8	4	13	4	5	7	5	9	17	0	3	1	0	4	6	7	9	9	22	23	24	33	38
CH249	B3.11	000_0.1%Tw80	63	41	52	76	97	83	92	86	67	72	82	85	61	47	50	58	35	25	36	41	18	29	21	15	8	3	4	12	9	3	3	0	2	0	2	8	10	2	4	25	53	71	80	123	143	140	134
CH251	C3.9	004_750ug CBDex	28	15	27	18	16	26	23	33	34	26	33	43	43	84	47	57	98	73	120	80	53	37	94	50	51	79	92	91	111	25	21	85	75	108	41	101	106	56	67	43	37	23	0	6	11	2	12
CH252	C3.10	004_750ug CBDex	16	5	38	37	54	46	31	27	47	21	62	61	71	47	47	52	35	20	50	49	64	77	24	24	6	19	26	17	41	95	37	21	67	124	40	14	0	6	5	3	4	1	1	3	2	9	2
CH253	C3.11	004_750ug CBDex	16	13	14	10	7	22	17	12	11	27	17	19	14	23	21	11	10	12	16	12	13	18	13	6	8	9	19	13	0	6	10	6	3	14	15	16	19	3	0	0	1	11	4	10	13	9	38
CH254	C3.12	004_750ug CBDex	26	13	24	51	22	19	45	6	11	17	38	31	33	24	17	34	48	18	33	20	18	12	21	2	26	17	22	53	11	19	21	75	62	9	75	57	39	10	5	0	1	0	0	1	13	18	26
CH255	C3.13	004_750ug CBDex	25	10	12	22	19	17	37	24	6	25	17	15	19	9	26	22	19	35	34	34	22	12	10	22	54	36	42	11	41	19	16	21	50	3	38	77	14	8	4	2	9	18	20	16	22	25	17
CH257	A3.14	001_VCe	77	54	76	93	54	87	92	87	88	94	97	63	56	46	32	23	69	32	43	20	4	10	6	3	0	17	89	178	11	6	4	2	25	23	33	7	7	13	10	4	0	2	18	12	7	14	10
CH258	A3.15	001_VCe	68	58	82	80	78	96	88	84	109	88	76	64	52	47	76	76	26	7	11	12	7	2	17	9	18	6	38	13	42	13	7	6	9	0	5	3	3	1	7	8	11	14	18	17	21	29	57
CH259	A3.16	001_VCe	26	64	64	81	91	90	97	94	86	80	98	89	93	122	93	80	73	59	88	80	68	24	61	68	70	58	40	94	68	19	65	59	61	2	0	2	10	15	15	25	27	86	111	110	118	146	140
CH262	B3.12	000_0.1%Tw80	94	79	95	81	85	107	123	93	101	108	112	91	84	74	80	48	80	105	171	72	81	89	174	168	113	39	14	14	9	12	14	10	16	0	3	3	2	2	9	12	26	20	24	33	24	41	25
CH263	B3.13	000_0.1%Tw80	54	87	46	62	71	50	71	60	91	90	65	62	73	54	36	43	66	42	36	63	125	126	26	15	12	14	5	8	8	151	154	0	0	1	0	0	0	0	5	33	13	4	5	13	12	25	17
CH264	B3.14	000_0.1%Tw80	42	59	73	66	77	77	53	75	57	63	71	68	50	35	43	19	49	25	20	15	14	8	15	4	11	14	26	3	4	6	8	15	25	0	1	3	8	4	4	3	10	14	42	57	36	68	78
CH265	B3.15	000_0.1%Tw80	41	33	58	70	87	69	81	69	71	76	63	85	74	68	46	55	66	83	64	76	80	50	65	66	46	36	65	95	116	101	45	13	66	41	14	22	11	30	21	23	50	88	87	87	132	130	134
CH268	C3.14	004_750ug CBDex	55	81	61	63	20	26	43	61	62	101	112	49	52	47	101	82	96	120	121	113	180	133	108	82	82	131	114	40	71	101	106	115	111	61	80	68	28	76	15	2	21	33	63	20	64	127	140
CH269	C3.15	004_750ug CBDex	19	43	41	31	13	44	54	59	65	47	72	56	14	29	41	62	63	113	77	55	28	44	47	22	7	12	7	32	67	64	60	11	18	5	8	1	0	0	0	0	0	3	2	24	4	13	11
CH270	C3.16	004_750ug CBDex	52	20	47	40	31	17	40	31	21	26	27	26	19	24	48	84	20	31	72	45	35	37	30	27	21	19	42	27	26	51	33	38	122	131	9	13	21	20	26	10	9	12	96	108	52	24	11
CH289	A4.0	002_300ug CBDex	6	7	17	23	22	34	31	31	19	32	31	12	26	24	37	14	13	10	10	12	8	13	7	4	10	13	7	9	2	1	3	1	0	0	0	2	0	0	0	0	0	4	7	22	34	46	27
CH290	A4.1	002_300ug CBDex	65	121	74	88	55	74	123	130	88	85	63	75	41	52	51	75	73	53	104	25	2	22	9	18	2	34	74	72	75	182	71	6	5	2	3	7	2	0	1	3	12	19	51	63	55	115	70
CH295	B4.0	001_VCe	43	63	58	56	50	59	68	90	76	94	78	97	77	52	55	38	68	19	52	104	18	21	22	22	9	12	5	4	2	1	5	0	0	0	0	0	0	2	1	3	0	1	10	9	6	26	31
CH296	B4.1	001_VCe	56	67	81	71	61	52	77	64	70	72	74	69	86	49	34	23	20	33	35	15	20	37	31	7	10	23	17	16	1	12	4	2	3	0	0	1	6	0	27	3	4	17	2	14	9	18	22
CH301	C4.0	000_0.1%Tw80	56	78	67	69	59	70	58	80	77	77	88	105	86	92	60	108	109	111	110	74	32	70	56	32	93	211	193	54	17	14	25	81	23	6	3	4	2	8	16	13	9	23	23	29	13	21	21
CH302	C4.1	000_0.1%Tw80	31	39	48	46	42	48	53	56	53	49	42	35	45	39	37	35	56	58	22	15	17	25	23	135	99	51	31	4	4	4	6	6	6	7	1	4	27	18	6	2	2	10	12	21	17	24	23
CH304	A4.2	002_300ug CBDex	92	64	69	78	79	103	131	109	95	88	108	125	79	94	101	78	105	81	87	55	66	137	100	148	249	221	196	208	162	156	165	193	234	265	241	243	238	243	207	190	148	71	92	150	96	169	127
CH305	A4.3	002_300ug CBDex	24	25	27	40	45	48	73	66	71	47	64	80	66	49	36	24	23	39	56	10	2	21	38	53	33	3	15	31	10	11	8	0	5	1	0	3	17	0	1	11	28	6	22	42	88	80	104
CH306	A4.4	002_300ug CBDex	45	39	34	39	32	63	55	41	29	38	63	40	57	24	24	16	30	40	51	42	4	26	26	18	8	5	1	8	9	4	16	5	15	3	1	1	0	1	4	13	17	0	5	16	21	20	9
CH307	A4.5	002_300ug CBDex	34	43	36	56	56	59	77	56	73	61	82	64	55	33	42	37	43	27	38	21	32	5	47	22	3	28	36	1	2	0	3	0	7	0	0	0	0	2	1	0	0	5	1	6	14	59	42
CH310	B4.2	001_VCe	60	47	72	63	48	51	73	87	84	82	97	96	82	58	39	74	57	27	27	29	76	221	235	87	23	30	41	162	27	5	16	7	8	2	10	13	0	2	2	16	27	13	4	3	23	48	11
CH311	B4.3	001_VCe	48	39	53	54	48	52	69	68	78	65	86	74	43	63	27	22	13	20	5	5	9	2	14	5	0	104	230	45	16	95	125	91	7	6	8	2	3	4	4	18	37	49	24	32	12	14	21
CH312	B4.4	001_VCe	49	67	78	77	65	70	109	81	73	85	74	86	91	63	51	52	21	12	8	16	11	13	30	32	70	37	40	29	16	192	47	29	86	95	113	150	165	98	115	82	36	15	32	25	16	66	51
CH313	B4.5	001_VCe	57	79	95	100	103	113	114	97	84	79	116	111	108	100	72	117	130	151	117	49	41	30	45	104	85	67	15	0	4	4	8	8	11	4	17	12	65	59	40	31	16	15	21	17	39	45	61
CH316	C4.2	000_0.1%Tw80	28	45	63	77	51	27	41	49	59	65	77	76	59	86	84	82	58	47	25	34	32	10	22	20	16	12	5	0	2	21	4	0	3	0	0	0	0	1	12	6	3	3	21	15	14	16	11
CH317	C4.3	000_0.1%Tw80	38	52	63	44	44	35	49	59	43	84	54	55	64	58	44	37	39	29	25	16	9	2	16	5	3	3	4	2	2	3	2	1	0	0	0	0	0	0	2	3	3	3	13	12	6	19	24
CH318	C4.4	000_0.1%Tw80	28	34	51	56	54	62	75	72	68	72	58	95	93	75	64	61	37	28	23	12	11	7	4	13	2	3	6	2	2	2	11	0	0	2	0	1	1	8	3	4	8	3	11	8	5	19	17
CH319	C4.5	000_0.1%Tw80	43	66	81	83	104	105	129	105	92	71	76	76	100	95	100	59	63	60	49	41	63	192	176	118	58	85	94	90	12	37	91	39	15	16	38	3	2	20	99	178	257	226	132	37	54	25	18
CH320	A4.6	002_300ug CBDex	32	38	24	40	45	64	73	56	87	57	68	68	47	52	58	53	18	15	28	36	11	4	6	16	28	7	3	11	8	0	0	0	0	0	0	0	0	0	0	0	10	8	10	2	3	4	4
CH321	A4.7	002_300ug CBDex	19	36	40	37	57	41	62	46	51	18	56	29	31	27	25	19	31	4	24	4	9	24	19	11	0	7	0	9	6	0	4	0	0	1	0	0	0	0	0	0	0	0	3	3	8	25	11
CH322	A4.8	002_300ug CBDex	34	27	49	55	53	53	54	56	68	54	51	40	33	56	46	23	19	9	12	25	10	5	6	9	1	6	9	6	2	3	20	7	17	4	7	4	14	0	0	0	1	0	4	14	9	30	30
CH323	A4.9	002_300ug CBDex	25	19	23	22	26	35	59	38	36	44	33	37	27	34	16	29	21	15	10	4	20	8	8	9	31	7	6	12	0	11	4	1	2	3	6	3	1	8	8	9	23	40	28	21	7	23	9
CH324	A4.10	002_300ug CBDex	19	31	15	53	26	21	41	36	40	51	31	19	44	27	23	13	43	47	31	34	23	33	52	34	10	24	43	26	34	19	14	21	36	1	9	3	6	1	1	13	10	22	64	68	50	63	52
CH326	B4.6	001_VCe	46	49	65	50	36	36	73	50	62	73	73	63	48	78	46	48	44	37	23	14	43	20	4	6	2	8	1	2	8	2	1	1	0	0	0	5	1	3	1	3	8	3	2	11	2	12	6
CH327	B4.7	001_VCe	35	35	47	46	51	67	68	72	63	89	64	39	46	46	18	21	20	23	15	6	0	5	4	7	3	1	1	1	0	5	7	4	3	0	14	0	3	5	9	5	6	3	2	8	8	42	43
CH328	B4.8	001_VCe	46	50	58	72	61	77	96	104	109	99	97	81	44	30	31	13	13	14	21	4	24	7	3	0	4	0	7	2	0	8	5	0	8	1	0	13	1	8	0	11	5	11	6	10	32	19	23
CH329	B4.9	001_VCe	24	70	92	80	145	114	97	111	96	95	104	73	79	69	51	24	18	12	3	10	11	3	8	0	12	0	15	3	14	0	3	0	5	0	3	0	0	2	1	2	25	23	44	74	70	88	116
CH331	C4.6	000_0.1%Tw80	39	28	10	11	46	41	43	35	45	51	35	16	85	123	118	88	91	92	92	100	108	130	71	99	47	10	10	11	19	55	61	122	94	23	64	46	18	5	4	33	65	90	53	38	19	62	71
CH332	C4.7	000_0.1%Tw80	35	43	42	48	47	42	49	49	41	65	61	62	54	30	45	34	43	28	23	9	17	20	7	4	6	7	57	152	102	16	7	5	1	0	0	0	3	11	4	13	8	14	22	28	11	9	18
CH333	C4.8	000_0.1%Tw80	53	55	58	52	55	53	51	60	69	61	76	72	49	58	47	32	37	15	32	49	17	14	39	55	16	10	19	2	0	0	26	56	19	7	17	6	4	0	4	11	3	14	10	16	23	64	59
CH334	C4.9	000_0.1%Tw80	44	56	74	66	72	79	80	82	91	88	100	65	67	53	21	32	21	15	14	14	3	13	1	26	6	8	0	0	0	1	4	0	0	0	0	0	2	6	7	6	22	23	23	27	16	22	31
CH335	C4.10	000_0.1%Tw80	45	47	70	81	89	86	100	99	85	101	80	73	83	94	84	119	105	97	47	47	34	34	25	38	20	15	24	36	51	34	16	7	15	1	10	2	0	4	2	6	10	9	32	21	42	68	60
CH336	A4.11	002_300ug CBDex	59	59	44	53	28	64	57	67	47	97	39	70	49	89	59	78	47	36	17	42	8	11	20	19	3	21	2	3	2	0	0	13	0	0	0	0	0	0	0	0	0	0	0	2	13	8	1
CH337	A4.12	002_300ug CBDex	29	27	26	44	36	38	25	25	33	37	27	41	49	38	35	17	13	9	11	30	27	1	14	8	0	12	20	3	1	0	2	0	0	0	0	0	0	0	2	1	0	0	0	9	2	9	20
CH338	A4.13	002_300ug CBDex	28	37	23	64	35	43	48	36	33	25	20	32	41	42	14	17	19	9	12	6	4	0	0	7	33	4	8	5	4	3	5	15	4	0	0	0	6	0	3	0	0	8	0	7	43	24	5
CH339	A4.14	002_300ug CBDex	65	32	32	100	99	80	50	45	62	59	29	35	52	41	23	19	19	21	17	17	17	9	6	16	11	2	13	37	4	20	17	19	3	0	10	3	0	0	1	2	21	15	15	63	39	46	50
CH342	B4.10	001_VCe	52	63	66	52	55	68	92	85	78	72	67	68	60	52	39	30	32	37	19	19	16	22	30	48	30	9	0	3	7	0	6	8	8	5	0	0	3	3	3	2	2	7	0	5	18	19	25
CH343	B4.11	001_VCe	19	32	37	57	71	65	80	65	54	62	58	39	47	38	32	36	28	14	20	18	5	9	7	0	0	3	0	3	3	4	13	13	3	0	2	0	11	2	9	2	7	6	2	6	11	17	11
CH344	B4.12	001_VCe	38	40	68	74	85	86	105	73	76	69	56	57	38	48	17	37	6	10	10	4	10	13	6	7	2	6	0	5	5	2	0	2	1	0	0	0	0	7	10	9	2	4	12	19	9	14	34
CH345	B4.13	001_VCe	46	72	70	118	106	82	75	102	94	79	68	62	41	14	25	8	26	16	4	7	30	5	6	42	0	6	16	15	42	8	6	3	8	0	3	3	0	1	6	11	18	29	46	81	121	111	129
CH348	C4.11	000_0.1%Tw80	45	45	43	41	74	74	32	48	68	65	66	74	61	55	47	63	62	72	62	77	37	62	16	11	8	25	34	41	49	103	92	15	10	13	8	0	1	2	0	7	17	28	19	36	21	22	4
CH349	C4.12	000_0.1%Tw80	36	53	70	79	76	74	78	71	70	67	80	38	55	55	25	37	29	23	16	22	6	11	6	1	5	14	22	54	67	2	12	7	0	0	1	0	0	2	1	6	6	13	11	19	27	55	123
CH350	C4.13	000_0.1%Tw80	42	60	75	76	87	80	82	89	97	81	61	76	72	47	35	33	24	15	18	7	4	6	11	4	15	1	2	2	2	2	10	2	21	15	12	2	0	3	2	7	4	3	11	8	13	26	38
CH351	C4.14	000_0.1%Tw80	47	59	104	110	113	109	111	114	124	103	115	126	112	82	81	68	71	78	45	53	91	113	25	37	12	11	10	6	10	17	6	8	5	0	1	5	4	10	10	15	113	65	108	112	132	138	156
CH353	A4.15	002_300ug CBDex	32	60	66	67	56	54	61	57	66	32	38	74	43	21	54	19	44	28	38	27	92	91	57	14	62	23	6	15	80	67	49	27	8	3	3	3	0	0	1	1	8	1	5	29	42	76	34
CH354	A4.16	002_300ug CBDex	40	35	60	91	41	67	59	57	64	47	28	90	59	104	107	20	17	62	28	17	17	21	11	32	9	16	14	6	5	6	12	7	14	1	7	4	0	0	2	2	20	43	15	30	17	106	48
CH359	B4.14	001_VCe	39	38	64	53	80	77	80	64	91	89	82	27	66	31	31	22	13	24	11	20	45	37	19	34	45	45	8	0	0	0	3	3	3	0	0	6	0	13	12	1	1	2	0	12	17	18	14
CH360	B4.15	001_VCe	71	66	67	66	92	81	100	112	81	78	50	59	65	57	38	39	35	28	10	5	19	5	1	17	3	8	19	30	10	10	8	5	20	1	2	4	10	1	3	9	22	8	9	21	25	39	41
CH365	C4.15	000_0.1%Tw80	63	60	65	75	75	53	52	68	58	80	57	74	56	93	67	62	21	19	19	5	6	8	7	7	7	8	14	15	28	45	22	3	9	1	0	2	0	1	4	13	2	39	33	27	17	34	21
CH366	C4.16	000_0.1%Tw80	66	98	108	87	117	81	103	104	110	105	87	93	92	78	64	52	35	25	30	24	25	27	22	17	31	35	11	0	0	24	0	4	21	2	0	16	41	2	136	59	82	51	55	26	70	66	105
[truncated: 90 more columns]

## Sheet: wDAT+ d1 ex2
DATE:	2023-11-08 19:16:21							2023-11-07	feed L1s at 5:35pm
FILE:	C:\Users\wmicrotracker\Desktop\wmicrotracker\p00018\20231107_1810							2023-11-07	start wMT at 6:10 pm
SUBPROJECT:	2023 1107-8 wDAT+ CBD&extract d1 ex2 bL							2023-11-08	stop at 7:15pm
<<<<<< Group Activity: Average Activity Counts per Data Interval>>>>>>
Group/Time[m]	30	60	90	120	150	180	210	240	270	300	330	360	390	420	450	480	510	540	570	600	630	660	690	720	750	780	810	840	870	900	930	960	990	1020	1050	1080	1110	1140	1170	1200	1230	1260	1290	1320	1350	1380	1410	1440	1470
bL 0.1%Tw80	77	115	115	111	122	123	133	137	134	133	128	126	120	118	109	106	93	90	81	73	65	63	58	54	44	53	51	50	44	42	40	42	37	41	38	35	36	39	40	52	55	63	75	92	92	90	96	100	103
bL VCe	61	118	111	111	119	129	133	138	138	139	134	126	129	119	117	107	98	90	79	80	68	65	61	65	56	52	49	47	44	42	41	45	43	38	34	23	21	25	27	36	51	62	63	72	73	77	86	85	93
bL 300ug CBD	65	76	66	69	70	80	83	89	95	94	92	90	96	92	86	85	83	84	74	72	74	72	84	58	61	66	64	59	57	55	52	60	63	60	61	57	56	58	64	72	67	64	66	70	74	85	79	82	88
bL 500ug CBD	64	60	64	66	64	64	62	59	64	71	65	70	69	69	79	74	71	71	72	78	78	78	76	73	64	64	65	69	57	71	70	75	75	64	78	65	74	70	66	64	63	59	46	47	47	58	68	66	67
bL 750ug CBD	53	45	38	39	49	35	31	31	43	45	46	41	50	49	60	54	60	56	59	55	55	53	54	59	65	63	71	67	52	67	68	65	51	52	61	54	46	54	54	55	60	61	56	45	37	35	43	36	40
bR 0.1%Tw80	82	125	116	118	132	133	136	142	141	137	136	132	123	122	124	116	100	92	83	78	69	75	71	64	59	55	48	48	50	50	48	50	40	48	41	43	45	45	47	49	50	60	63	76	85	94	105	105	105
bR VCe	59	103	108	108	114	124	134	136	140	136	131	113	115	116	99	90	92	76	68	69	71	65	61	56	40	46	44	37	32	35	32	28	22	19	20	20	15	17	25	30	36	36	44	58	65	68	73	79	83
bR 300ex	51	78	68	69	86	87	96	102	106	106	101	101	97	98	100	92	91	87	82	81	92	70	69	78	71	72	67	70	64	58	64	67	75	63	52	49	38	41	34	28	35	60	63	76	79	94	104	96	120
bR 500ex	32	31	25	28	31	33	28	29	29	27	24	31	29	28	31	29	29	30	27	31	26	27	26	25	23	26	26	23	20	23	26	33	23	21	22	19	18	19	19	17	14	18	17	17	21	23	25	24	31
bR 750ex	52	47	36	43	47	35	35	37	45	52	58	61	59	61	63	64	65	69	65	60	63	62	67	70	59	71	59	64	59	63	61	63	61	55	65	68	61	67	78	64	69	60	64	64	60	61	59	54	54
<<<<<< Group Activity: Standard Error >>>>>>
Group/Time[m]	30	60	90	120	150	180	210	240	270	300	330	360	390	420	450	480	510	540	570	600	630	660	690	720	750	780	810	840	870	900	930	960	990	1020	1050	1080	1110	1140	1170	1200	1230	1260	1290	1320	1350	1380	1410	1440	1470
000_bL 0.1%Tw80	0	0	0	0	0	0	0	0	0	0	0	0	0	0	0	0	0	0	0	0	0	0	0	0	0	0	0	0	0	0	0	0	0	0	0	0	0	0	0	0	0	0	0	0	0	0	0	0	0
001_bL VCe	0	0	0	0	0	0	0	0	0	0	0	0	0	0	0	0	0	0	0	0	0	0	0	0	0	0	0	0	0	0	0	0	0	0	0	0	0	0	0	0	0	0	0	0	0	0	0	0	0
002_bL 300ug CBD	0	0	0	0	0	0	0	0	0	0	0	0	0	0	0	0	0	0	0	0	0	0	0	0	0	0	0	0	0	0	0	0	0	0	0	0	0	0	0	0	0	0	0	0	0	0	0	0	0
003_bL 500ug CBD	0	0	0	0	0	0	0	0	0	0	0	0	0	0	0	0	0	0	0	0	0	0	0	0	0	0	0	0	0	0	0	0	0	0	0	0	0	0	0	0	0	0	0	0	0	0	0	0	0
004_bL 750ug CBD	0	0	0	0	0	0	0	0	0	0	0	0	0	0	0	0	0	0	0	0	0	0	0	0	0	0	0	0	0	0	0	0	0	0	0	0	0	0	0	0	0	0	0	0	0	0	0	0	0
005_bR 0.1%Tw80	0	0	0	0	0	0	0	0	0	0	0	0	0	0	0	0	0	0	0	0	0	0	0	0	0	0	0	0	0	0	0	0	0	0	0	0	0	0	0	0	0	0	0	0	0	0	0	0	0
006_bR VCe	0	0	0	0	0	0	0	0	0	0	0	0	0	0	0	0	0	0	0	0	0	0	0	0	0	0	0	0	0	0	0	0	0	0	0	0	0	0	0	0	0	0	0	0	0	0	0	0	0
007_bR 300ex	0	0	0	0	0	0	0	0	0	0	0	0	0	0	0	0	0	0	0	0	0	0	0	0	0	0	0	0	0	0	0	0	0	0	0	0	0	0	0	0	0	0	0	0	0	0	0	0	0
008_bR 500ex	18.5	21.9	17.3	23.7	20.2	23.1	24.2	26.6	29.4	26.6	24.2	30.6	28.9	28.3	30.6	29.4	28.9	30	27.1	31.2	26.6	26.6	26	25.4	23.1	26	26.6	22.5	16.7	22.5	25.4	25.4	22.5	20.8	21.4	18.5	17.9	18.5	17.9	16.7	13.9	16.7	16.7	17.3	18.5	18.5	17.3	19.6	26.6
009_bR 750ex	0	0	0	0	0	0	0	0	0	0	0	0	0	0	0	0	0	0	0	0	0	0	0	0	0	0	0	0	0	0	0	0	0	0	0	0	0	0	0	0	0	0	0	0	0	0	0	0	0
<<<<<< Group Activity: Number of wells/group >>>>>>
Group/Time[m]	30	60	90	120	150	180	210	240	270	300	330	360	390	420	450	480	510	540	570	600	630	660	690	720	750	780	810	840	870	900	930	960	990	1020	1050	1080	1110	1140	1170	1200	1230	1260	1290	1320	1350	1380	1410	1440	1470
000_bL 0.1%Tw80	1	1	1	1	1	1	1	1	1	1	1	1	1	1	1	1	1	1	1	1	1	1	1	1	1	1	1	1	1	1	1	1	1	1	1	1	1	1	1	1	1	1	1	1	1	1	1	1	1
001_bL VCe	1	1	1	1	1	1	1	1	1	1	1	1	1	1	1	1	1	1	1	1	1	1	1	1	1	1	1	1	1	1	1	1	1	1	1	1	1	1	1	1	1	1	1	1	1	1	1	1	1
002_bL 300ug CBD	1	1	1	1	1	1	1	1	1	1	1	1	1	1	1	1	1	1	1	1	1	1	1	1	1	1	1	1	1	1	1	1	1	1	1	1	1	1	1	1	1	1	1	1	1	1	1	1	1
003_bL 500ug CBD	1	1	1	1	1	1	1	1	1	1	1	1	1	1	1	1	1	1	1	1	1	1	1	1	1	1	1	1	1	1	1	1	1	1	1	1	1	1	1	1	1	1	1	1	1	1	1	1	1
004_bL 750ug CBD	1	1	1	1	1	1	1	1	1	1	1	1	1	1	1	1	1	1	1	1	1	1	1	1	1	1	1	1	1	1	1	1	1	1	1	1	1	1	1	1	1	1	1	1	1	1	1	1	1
005_bR 0.1%Tw80	1	1	1	1	1	1	1	1	1	1	1	1	1	1	1	1	1	1	1	1	1	1	1	1	1	1	1	1	1	1	1	1	1	1	1	1	1	1	1	1	1	1	1	1	1	1	1	1	1
006_bR VCe	1	1	1	1	1	1	1	1	1	1	1	1	1	1	1	1	1	1	1	1	1	1	1	1	1	1	1	1	1	1	1	1	1	1	1	1	1	1	1	1	1	1	1	1	1	1	1	1	1
007_bR 300ex	1	1	1	1	1	1	1	1	1	1	1	1	1	1	1	1	1	1	1	1	1	1	1	1	1	1	1	1	1	1	1	1	1	1	1	1	1	1	1	1	1	1	1	1	1	1	1	1	1
008_bR 500ex	3	3	3	3	3	3	3	3	3	3	3	3	3	3	3	3	3	3	3	3	3	3	3	3	3	3	3	3	3	3	3	3	3	3	3	3	3	3	3	3	3	3	3	3	3	3	3	3	3
009_bR 750ex	1	1	1	1	1	1	1	1	1	1	1	1	1	1	1	1	1	1	1	1	1	1	1	1	1	1	1	1	1	1	1	1	1	1	1	1	1	1	1	1	1	1	1	1	1	1	1	1	1
<<<<<< Number of Samples per Acquisition Interval [1unit=500values] >>>>>>
Time[m]	30	60	90	120	150	180	210	240	270	300	330	360	390	420	450	480	510	540	570	600	630	660	690	720	750	780	810	840	870	900	930	960	990	1020	1050	1080	1110	1140	1170	1200	1230	1260	1290	1320	1350	1380	1410	1440	1470
#Samples	30	30	30	30	30	30	30	30	30	30	30	30	30	30	30	30	30	30	30	30	30	30	30	30	30	30	30	30	30	30	30	30	30	30	30	30	30	30	30	30	30	30	30	30	30	30	30	30	30
<<<<<< Average Temperature [°C] >>>>>>
Time[m]	30	60	90	120	150	180	210	240	270	300	330	360	390	420	450	480	510	540	570	600	630	660	690	720	750	780	810	840	870	900	930	960	990	1020	1050	1080	1110	1140	1170	1200	1230	1260	1290	1320	1350	1380	1410	1440	1470
Temp[°C]	21.7	21.7	21.7	21.7	21.7	21.7	21.5	21.5	21.5	21.7	21.7	21.7	21.7	21.7	21.7	21.7	21.7	21.7	21.7	21.7	21.7	21.7	21.7	21.7	21.7	21.7	21.9	21.7	21.7	21.7	21.7	21.7	21.7	21.7	21.7	21.7	21.7	21.7	21.7	21.7	21.7	21.7	21.7	21.7	21.7	21.7	21.7	21.7	21.7
<<<<<< Well Activity >>>>>>
Well	Group/Time[m]	30	60	90	120	150	180	210	240	270	300	330	360	390	420	450	480	510	540	570	600	630	660	690	720	750	780	810	840	870	900	930	960	990	1020	1050	1080	1110	1140	1170	1200	1230	1260	1290	1320	1350	1380	1410	1440
A1	000_bL 0.1%Tw80	77	115	115	111	122	123	133	137	134	133	128	126	120	118	109	106	93	90	81	73	65	63	58	54	44	53	51	50	44	42	40	42	37	41	38	35	36	39	40	52	55	63	75	92	92	90	96	100
B1	005_bR 0.1%Tw80	82	125	116	118	132	133	136	142	141	137	136	132	123	122	124	116	100	92	83	78	69	75	71	64	59	55	48	48	50	50	48	50	40	48	41	43	45	45	47	49	50	60	63	76	85	94	105	105
C1	004_bL 750ug CBD	53	45	38	39	49	35	31	31	43	45	46	41	50	49	60	54	60	56	59	55	55	53	54	59	65	63	71	67	52	67	68	65	51	52	61	54	46	54	54	55	60	61	56	45	37	35	43	36
A2	001_bL VCe	61	118	111	111	119	129	133	138	138	139	134	126	129	119	117	107	98	90	79	80	68	65	61	65	56	52	49	47	44	42	41	45	43	38	34	23	21	25	27	36	51	62	63	72	73	77	86	85
B2	006_bR VCe	59	103	108	108	114	124	134	136	140	136	131	113	115	116	99	90	92	76	68	69	71	65	61	56	40	46	44	37	32	35	32	28	22	19	20	20	15	17	25	30	36	36	44	58	65	68	73	79
C2	009_bR 750ex	52	47	36	43	47	35	35	37	45	52	58	61	59	61	63	64	65	69	65	60	63	62	67	70	59	71	59	64	59	63	61	63	61	55	65	68	61	67	78	64	69	60	64	64	60	61	59	54
A3	002_bL 300ug CBD	65	76	66	69	70	80	83	89	95	94	92	90	96	92	86	85	83	84	74	72	74	72	84	58	61	66	64	59	57	55	52	60	63	60	61	57	56	58	64	72	67	64	66	70	74	85	79	82
B3	007_bR 300ex	51	78	68	69	86	87	96	102	106	106	101	101	97	98	100	92	91	87	82	81	92	70	69	78	71	72	67	70	64	58	64	67	75	63	52	49	38	41	34	28	35	60	63	76	79	94	104	96
C3	008_bR 500ex	13	8	6	4	10	9	3	3	0	0	0	0	0	0	0	0	0	0	0	0	0	0	0	0	0	0	0	0	1	0	0	6	0	0	0	1	0	1	0	0	0	1	0	0	2	5	6	4
A4	003_bL 500ug CBD	64	60	64	66	64	64	62	59	64	71	65	70	69	69	79	74	71	71	72	78	78	78	76	73	64	64	65	69	57	71	70	75	75	64	78	65	74	70	66	64	63	59	46	47	47	58	68	66
B4	008_bR 500ex	69	75	59	75	71	79	77	82	88	80	73	92	86	85	93	88	87	90	81	93	79	80	78	76	69	78	79	68	53	68	77	84	68	63	65	56	54	56	55	51	41	52	51	52	58	60	60	63
C4	008_bR 500ex	14	9	9	5	11	10	4	3	0	0	0	0	0	0	1	0	1	1	0	0	0	0	0	0	0	0	0	1	5	2	0	10	1	1	1	1	0	1	1	1	0	1	0	0	2	4	9	6
<<<<<< Channel Activity >>>>>>
Channel	Well	Group/Time[m]	30	60	90	120	150	180	210	240	270	300	330	360	390	420	450	480	510	540	570	600	630	660	690	720	750	780	810	840	870	900	930	960	990	1020	1050	1080	1110	1140	1170	1200	1230	1260	1290	1320	1350	1380	1410
CH17	A1.0	000_bL 0.1%Tw80	100	134	123	136	148	138	116	104	96	93	79	76	138	134	111	155	139	140	150	127	135	134	141	126	106	49	133	142	169	54	8	11	0	2	0	3	0	0	4	9	14	18	24	21	31	41	60
CH18	A1.1	000_bL 0.1%Tw80	87	120	101	113	132	141	143	145	118	141	130	119	116	128	117	95	95	68	69	61	47	32	46	67	14	36	9	1	5	11	18	7	2	0	1	0	0	0	0	1	11	19	12	32	17	50	42
CH23	B1.0	005_bR 0.1%Tw80	80	106	90	119	123	115	117	124	106	105	97	108	94	92	115	69	87	104	98	89	54	121	137	166	105	65	17	8	17	17	3	16	1	11	1	0	1	2	25	7	6	6	19	49	22	34	49
CH24	B1.1	005_bR 0.1%Tw80	72	126	126	116	130	129	126	144	109	111	107	124	94	111	99	77	91	76	97	67	117	73	35	48	69	45	67	73	54	52	5	19	1	3	0	2	1	6	25	15	10	44	24	18	26	50	84
CH29	C1.0	004_bL 750ug CBD	94	71	83	90	110	90	55	108	132	73	39	25	14	5	29	28	22	16	49	16	53	11	20	16	3	2	10	19	32	27	51	32	10	10	4	5	24	25	3	53	30	31	19	23	20	50	65
CH30	C1.1	004_bL 750ug CBD	27	31	35	51	18	35	14	7	2	1	6	4	4	0	27	6	21	30	17	41	6	12	7	29	27	7	20	37	22	25	30	37	11	15	5	6	4	0	0	0	28	13	0	0	2	8	14
CH32	A1.2	000_bL 0.1%Tw80	85	135	148	125	143	152	152	159	143	153	140	133	151	151	131	107	88	74	57	36	44	26	16	22	5	15	2	6	12	7	2	6	0	0	5	0	0	0	9	8	19	23	45	114	74	47	61
CH33	A1.3	000_bL 0.1%Tw80	64	74	91	89	109	95	104	115	112	106	107	109	94	82	68	65	45	38	25	27	20	13	15	13	2	3	4	8	0	0	0	1	0	0	0	0	0	0	0	0	4	16	18	33	32	11	28
CH34	A1.4	000_bL 0.1%Tw80	44	88	99	96	127	106	102	151	170	130	127	129	113	104	96	71	40	40	22	16	14	15	4	2	36	5	2	2	3	0	0	8	0	0	0	0	0	0	0	3	8	5	14	18	18	44	24
CH35	A1.5	000_bL 0.1%Tw80	38	138	120	114	126	112	120	135	149	118	129	118	112	91	96	86	88	63	38	30	17	34	21	2	3	8	6	0	14	0	0	0	0	0	2	1	0	0	5	2	16	28	46	37	49	25	47
CH38	B1.2	005_bR 0.1%Tw80	156	110	133	123	146	159	148	159	133	137	138	149	96	126	140	135	85	74	53	49	25	12	17	7	8	14	4	15	40	50	8	12	6	0	20	42	67	110	24	2	1	11	9	32	31	50	56
CH39	B1.3	005_bR 0.1%Tw80	56	101	94	100	124	145	128	139	144	129	127	102	121	112	111	90	58	37	38	38	15	8	3	22	7	3	5	8	4	0	6	1	0	1	1	0	0	0	0	1	7	11	23	20	40	53	51
CH40	B1.4	005_bR 0.1%Tw80	51	123	92	120	123	133	124	141	165	150	135	139	114	113	100	82	67	55	24	38	26	54	27	6	2	14	7	4	1	0	0	6	0	2	0	0	3	3	1	8	9	16	16	19	37	55	55
CH41	B1.5	005_bR 0.1%Tw80	67	126	103	128	127	126	141	146	150	130	139	131	128	131	110	91	84	92	71	49	35	70	69	21	22	44	16	28	9	3	6	20	16	1	0	3	6	2	13	23	17	32	26	42	45	69	70
CH44	C1.2	004_bL 750ug CBD	63	48	58	54	106	23	31	48	80	47	36	44	101	89	82	76	86	52	51	108	84	127	55	50	132	126	97	94	37	29	24	77	46	4	21	14	3	21	11	19	83	62	14	34	26	9	20
CH45	C1.3	004_bL 750ug CBD	52	63	12	23	25	25	25	20	43	33	46	21	26	39	53	37	31	25	36	34	18	36	17	36	36	4	2	34	17	66	25	24	11	12	25	16	3	31	7	5	8	5	1	0	5	5	14
CH46	C1.4	004_bL 750ug CBD	40	18	18	17	41	26	20	19	22	31	31	19	27	20	42	20	36	42	37	38	6	10	32	37	1	18	33	26	31	61	26	11	12	57	33	1	5	4	0	0	0	0	2	4	0	4	5
CH47	C1.5	004_bL 750ug CBD	48	33	36	35	12	21	8	6	44	17	9	0	71	21	46	19	26	54	56	47	44	11	75	61	68	60	93	14	20	51	57	46	38	36	37	37	27	102	116	92	71	20	9	16	3	6	41
CH48	A1.6	000_bL 0.1%Tw80	127	146	124	123	134	127	149	130	117	134	124	125	125	147	128	135	118	138	86	58	48	103	67	58	28	126	18	14	10	67	8	16	11	4	1	0	12	3	17	10	16	21	44	54	85	90	175
CH49	A1.7	000_bL 0.1%Tw80	39	98	93	99	86	132	139	141	133	133	128	125	94	80	88	80	53	45	38	22	11	15	14	1	19	7	5	0	2	6	0	4	0	0	0	1	1	0	1	8	5	20	29	52	30	65	34
CH50	A1.8	000_bL 0.1%Tw80	59	127	91	106	123	142	163	172	177	164	159	136	117	123	95	94	46	54	46	20	23	9	1	4	20	8	1	0	0	1	0	6	6	0	0	0	0	0	5	10	10	24	34	81	49	47	30
CH51	A1.9	000_bL 0.1%Tw80	76	123	127	91	129	126	152	163	157	149	142	153	132	96	95	92	90	65	73	36	17	8	11	22	12	49	51	11	6	7	0	14	17	0	0	0	0	2	0	6	12	9	24	42	54	39	67
CH52	A1.10	000_bL 0.1%Tw80	62	104	109	119	113	104	116	127	125	142	132	131	146	141	161	139	118	144	161	150	155	167	144	162	149	140	123	133	43	36	44	50	4	10	4	17	8	28	17	113	147	147	196	198	212	220	185
CH54	B1.6	005_bR 0.1%Tw80	74	132	113	114	132	134	131	146	149	133	148	154	130	141	137	142	111	86	84	94	61	73	57	21	22	14	9	1	5	1	1	14	1	2	2	0	0	1	5	1	22	11	15	47	58	80	107
CH55	B1.7	005_bR 0.1%Tw80	31	107	129	120	138	130	149	155	150	151	126	126	132	125	117	108	75	70	62	66	17	13	7	6	1	3	0	0	2	2	0	3	0	0	0	0	0	0	0	8	5	29	28	24	32	78	92
CH56	B1.8	005_bR 0.1%Tw80	68	123	105	108	149	117	136	137	151	142	154	128	118	127	102	115	74	64	46	28	23	39	45	38	11	31	6	1	4	0	3	6	0	0	0	2	0	1	1	12	3	13	31	28	34	33	56
CH57	B1.9	005_bR 0.1%Tw80	66	161	121	118	143	151	175	162	182	153	157	147	160	133	149	125	118	135	78	84	80	40	46	42	26	24	24	13	7	6	4	4	0	6	0	0	4	0	1	16	0	24	28	50	91	79	88
CH59	C1.6	004_bL 750ug CBD	22	7	18	19	20	31	40	24	41	24	21	12	22	31	26	48	58	39	46	44	55	68	57	48	70	74	87	85	60	51	56	49	44	39	48	81	75	61	86	50	82	87	80	48	40	67	72
CH60	C1.7	004_bL 750ug CBD	72	67	79	59	123	118	63	37	73	133	101	114	103	96	121	106	147	74	107	109	143	99	110	189	158	95	135	116	74	123	220	180	155	159	162	137	164	86	82	173	200	234	148	44	29	14	10
CH61	C1.8	004_bL 750ug CBD	59	37	18	51	37	58	29	18	45	81	84	81	80	92	64	43	69	75	86	42	29	12	62	37	21	62	90	57	68	49	48	93	23	25	12	15	21	27	42	35	11	20	14	16	9	9	43
CH62	C1.9	004_bL 750ug CBD	40	47	48	31	71	14	28	33	43	34	29	33	40	18	52	62	50	49	48	50	54	49	33	47	68	50	38	76	39	43	23	26	13	15	32	12	1	8	0	3	3	19	2	10	7	6	17
CH63	C1.10	004_bL 750ug CBD	44	74	25	27	23	23	28	21	30	34	34	8	19	20	52	51	44	66	91	41	56	34	38	104	56	48	7	80	79	95	62	27	21	37	71	42	49	6	40	67	9	19	14	2	0	8	7
CH64	A1.11	000_bL 0.1%Tw80	133	167	175	123	139	147	171	147	151	171	171	163	155	174	155	184	164	195	188	213	193	178	157	163	161	157	155	166	177	166	180	161	181	253	213	207	193	213	196	201	174	194	190	213	212	189	202
CH65	A1.12	000_bL 0.1%Tw80	114	137	141	130	140	113	142	115	147	150	125	137	130	122	103	89	99	74	47	50	32	14	17	11	1	9	3	10	1	3	0	6	2	1	0	0	1	8	4	15	33	49	67	79	86	63	106
CH66	A1.13	000_bL 0.1%Tw80	99	106	110	114	134	142	169	153	145	153	148	131	119	107	72	93	57	57	50	39	32	28	42	4	3	4	0	0	6	7	0	8	0	5	6	0	0	4	3	18	7	33	32	66	71	66	53
CH67	A1.14	000_bL 0.1%Tw80	45	90	107	117	112	100	104	124	117	96	126	107	101	102	94	79	71	82	100	67	62	33	35	25	14	7	22	33	12	3	2	10	0	4	0	1	2	4	6	7	30	65	85	119	138	133	116
CH70	B1.10	005_bR 0.1%Tw80	124	153	151	151	145	152	144	164	147	150	152	144	157	154	165	166	150	146	168	164	180	189	197	184	183	211	163	192	168	186	244	253	205	235	202	209	191	162	199	220	225	233	206	220	196	203	219
CH71	B1.11	005_bR 0.1%Tw80	115	131	139	111	145	133	136	148	140	163	140	145	132	104	138	126	114	97	86	41	92	72	108	32	32	26	44	7	4	17	2	9	3	11	11	0	4	1	4	11	6	16	40	78	102	90	76
CH72	B1.12	005_bR 0.1%Tw80	67	128	102	120	138	148	136	131	133	129	158	142	138	117	133	124	86	87	52	66	50	61	19	16	29	27	12	6	19	17	4	12	0	5	0	1	9	0	0	5	10	18	22	42	71	68	115
CH73	B1.13	005_bR 0.1%Tw80	145	133	115	132	114	142	123	137	139	149	139	129	127	148	128	144	142	106	109	116	102	103	131	117	149	101	125	122	118	87	111	60	14	75	16	4	6	5	11	27	27	74	101	151	153	167	177
CH76	C1.11	004_bL 750ug CBD	95	109	103	90	93	51	92	55	25	55	109	107	100	108	122	132	125	145	126	98	119	138	145	97	134	171	179	191	149	143	166	156	204	196	226	212	214	217	235	201	184	184	224	216	194	177	198
CH77	C1.12	004_bL 750ug CBD	62	34	36	29	51	48	34	79	71	68	73	67	88	91	48	77	94	80	65	77	65	92	59	51	81	39	89	57	21	66	41	94	63	41	25	44	9	84	91	137	63	17	65	19	2	6	8
CH78	C1.13	004_bL 750ug CBD	65	58	13	51	39	20	33	32	75	83	74	79	64	80	79	68	82	87	70	36	61	64	54	72	91	138	35	37	49	105	114	100	71	39	63	71	40	68	28	12	48	48	81	80	48	30	10
CH79	C1.14	004_bL 750ug CBD	86	50	40	28	52	6	11	4	5	38	71	49	33	33	86	75	66	32	51	55	42	59	53	34	64	119	164	95	62	72	86	53	49	81	128	63	51	49	35	3	71	128	157	123	122	115	72
CH81	A1.15	000_bL 0.1%Tw80	53	70	82	84	74	92	100	98	91	97	93	100	100	87	105	105	123	138	104	142	110	100	121	97	76	117	183	195	193	191	217	202	193	197	208	200	232	222	216	218	186	183	192	187	201	182	186
CH82	A1.16	000_bL 0.1%Tw80	76	94	120	116	111	118	126	146	137	134	123	156	105	133	146	139	152	108	126	148	148	161	134	133	105	163	142	121	101	149	197	207	211	221	198	162	168	182	203	260	236	220	215	217	211	217	219
CH87	B1.14	005_bR 0.1%Tw80	63	116	114	95	97	116	116	101	108	114	121	113	105	105	112	116	117	118	118	125	102	145	151	143	149	106	107	132	161	183	179	178	194	200	193	210	218	220	211	207	226	197	200	177	201	183	194
CH88	B1.15	005_bR 0.1%Tw80	75	129	128	116	132	105	142	139	147	145	139	131	124	120	123	139	133	125	138	128	122	122	92	150	123	154	154	163	194	186	184	194	206	212	208	212	216	206	225	225	226	232	215	225	217	208	193
CH93	C1.15	004_bL 750ug CBD	13	6	15	7	5	9	7	6	3	7	14	12	35	63	60	44	30	47	52	70	59	52	50	66	58	37	87	106	101	93	107	69	77	98	115	110	82	117	94	79	99	118	96	102	97	60	94
CH94	C1.16	004_bL 750ug CBD	13	6	10	3	9	0	3	8	3	2	9	28	19	32	30	26	33	46	21	24	39	32	44	25	39	25	39	20	30	43	28	30	26	19	27	57	18	15	45	14	27	34	31	33	26	27	37
CH113	A2.0	001_bL VCe	67	141	121	102	106	139	143	125	143	167	143	133	153	109	126	95	135	93	93	58	61	37	70	63	54	31	37	12	22	45	24	6	18	8	13	6	0	8	4	20	49	52	87	91	69	71	61
CH114	A2.1	001_bL VCe	47	119	128	113	113	130	141	153	142	129	112	113	114	88	95	81	66	82	86	80	74	40	31	33	21	5	10	25	40	2	10	9	9	0	2	3	0	5	2	4	5	19	11	13	8	20	22
CH115	A2.2	001_bL VCe	42	105	106	109	117	117	119	135	137	142	144	125	126	78	85	59	65	46	74	35	44	35	29	20	13	9	7	8	5	6	0	12	9	7	10	0	2	15	21	44	152	140	55	28	30	25	24
CH118	B2.0	006_bR VCe	68	106	113	126	163	150	121	134	126	139	132	125	107	137	119	84	97	78	92	166	134	107	199	138	43	67	77	22	13	5	11	6	0	0	0	0	0	0	0	0	5	8	7	8	16	29	17
CH119	B2.1	006_bR VCe	43	103	93	121	112	115	135	112	147	112	116	114	122	120	103	105	94	75	63	46	20	31	11	19	0	4	8	0	4	1	6	5	0	1	4	0	0	0	0	2	3	6	6	14	11	11	17
CH120	B2.2	006_bR VCe	66	111	125	121	106	127	166	127	144	128	113	98	130	133	112	77	109	105	75	60	99	99	62	46	82	139	99	64	71	22	23	0	0	0	0	0	0	0	4	1	2	2	1	7	5	6	21
CH121	B2.3	006_bR VCe	35	64	103	106	106	108	103	121	109	119	78	91	95	118	86	83	73	50	47	74	51	35	36	50	24	47	59	26	17	20	28	76	61	61	32	40	7	13	7	11	4	7	8	33	33	20	33
CH124	C2.0	009_bR 750ex	60	73	60	56	86	58	45	58	61	64	64	71	89	97	95	122	93	117	50	78	115	48	53	80	93	144	79	141	106	151	62	122	105	92	74	57	26	47	16	1	33	43	118	137	111	103	49
CH125	C2.1	009_bR 750ex	82	55	30	47	33	36	43	33	40	27	79	77	71	68	55	49	58	49	46	56	18	32	78	62	32	56	52	52	45	70	40	40	26	41	12	46	58	70	100	108	124	129	60	76	100	86	31
CH126	C2.2	009_bR 750ex	84	64	61	60	98	33	28	18	23	15	15	16	17	18	40	32	24	41	19	40	43	33	42	51	51	51	48	64	29	5	29	39	10	12	79	36	4	24	3	3	1	0	0	1	5	15	15
CH128	A2.3	001_bL VCe	84	155	135	144	129	128	151	130	145	127	126	134	155	135	134	112	86	42	46	39	5	17	7	7	2	4	15	4	7	5	2	12	1	2	0	2	1	4	0	9	15	26	7	25	39	47	92
CH129	A2.4	001_bL VCe	28	80	83	91	81	99	124	111	135	134	122	103	114	119	99	76	79	44	32	36	17	9	11	12	9	20	2	4	0	0	0	0	0	0	0	0	0	2	2	7	4	17	11	18	18	14	14
CH130	A2.5	001_bL VCe	51	105	95	92	104	123	128	124	132	140	129	109	127	125	111	94	57	57	44	30	14	15	7	12	11	7	11	1	0	6	0	11	13	9	0	0	0	0	0	1	4	8	8	34	21	13	22
CH131	A2.6	001_bL VCe	56	118	130	94	152	154	150	152	149	129	144	135	133	130	119	92	91	85	88	52	43	68	58	85	59	15	18	13	9	4	1	5	2	7	0	2	3	2	5	19	13	10	51	31	25	46	66
CH132	A2.7	001_bL VCe	86	117	98	109	97	118	103	113	109	110	128	102	126	120	110	112	122	83	67	98	108	97	92	128	165	175	182	167	169	186	185	203	166	173	128	31	40	32	48	63	70	101	106	129	122	145	152
CH134	B2.4	006_bR VCe	44	88	123	124	127	121	106	148	130	126	131	105	125	115	107	74	87	74	66	80	65	73	102	38	64	66	82	94	93	45	79	17	4	0	0	0	0	4	0	1	2	3	2	3	9	17	23
CH135	B2.5	006_bR VCe	55	95	89	84	107	111	118	157	127	133	153	100	102	100	67	70	80	56	28	46	32	35	35	42	2	3	0	5	5	0	5	10	0	0	0	4	2	42	89	111	111	78	67	72	41	29	37
CH136	B2.6	006_bR VCe	48	105	117	88	112	127	132	155	143	143	146	102	137	87	84	75	37	43	22	20	39	17	10	8	6	8	5	0	2	10	1	6	0	0	0	3	8	2	8	2	3	13	5	31	13	18	32
CH137	B2.7	006_bR VCe	101	140	141	127	139	138	173	162	150	131	135	112	117	132	135	115	115	100	97	100	92	134	68	37	45	73	26	71	6	12	11	0	2	0	7	5	0	0	15	47	20	15	94	192	160	149	147
CH139	C2.3	009_bR 750ex	9	2	1	2	5	5	7	8	29	21	14	8	7	11	21	28	21	12	12	3	10	3	4	3	4	3	4	0	2	5	0	3	2	6	1	3	0	0	1	1	1	2	2	1	0	0	0
CH140	C2.4	009_bR 750ex	75	77	63	77	41	48	27	79	50	86	97	107	119	98	118	94	114	139	87	111	99	96	130	102	77	60	78	116	77	65	92	58	99	96	151	124	156	96	131	59	151	129	185	147	110	111	112
CH141	C2.5	009_bR 750ex	51	34	16	24	33	16	30	40	42	47	71	49	26	55	54	52	33	31	60	34	55	62	51	63	64	43	48	33	22	20	39	47	41	60	15	33	15	9	30	52	8	17	2	0	2	6	6
CH142	C2.6	009_bR 750ex	53	45	36	31	34	33	76	51	95	87	84	57	51	72	52	51	79	91	89	43	83	82	64	57	45	70	78	63	48	48	36	99	86	64	14	34	61	85	72	30	8	4	4	9	0	20	30
CH143	C2.7	009_bR 750ex	34	18	11	14	17	8	3	10	8	17	11	14	13	34	32	25	23	38	31	25	38	47	35	27	30	38	39	28	24	28	30	69	8	9	14	10	29	4	15	26	30	16	16	15	32	43	88
CH144	A2.8	001_bL VCe	73	136	128	144	136	152	116	145	139	117	156	123	111	138	106	91	98	64	43	62	21	3	21	16	19	6	5	1	12	14	3	26	7	5	3	3	4	1	4	14	7	21	27	21	56	33	71
CH145	A2.9	001_bL VCe	65	94	106	97	119	115	128	156	133	127	137	128	130	122	109	96	67	47	22	23	23	18	3	0	5	1	4	6	12	13	0	19	0	3	2	2	2	3	2	4	5	11	10	18	20	29	27
CH146	A2.10	001_bL VCe	44	97	82	98	108	111	149	143	146	159	139	129	132	102	100	93	69	61	51	28	27	28	12	30	25	22	6	2	5	0	0	9	0	0	0	0	7	0	0	2	4	5	18	19	53	29	30
CH147	A2.11	001_bL VCe	53	124	114	120	98	118	156	141	131	148	136	115	119	122	109	120	102	122	88	135	76	64	59	51	54	105	76	44	43	19	1	6	0	1	9	0	7	2	0	4	27	8	34	31	36	50	59
CH148	A2.12	001_bL VCe	47	102	95	109	131	132	127	141	145	164	133	136	140	129	129	143	117	130	81	81	83	72	65	88	63	62	44	66	51	34	44	15	81	15	5	1	19	45	63	93	176	207	205	221	220	216	228
CH150	B2.8	006_bR VCe	134	140	122	132	108	123	126	160	156	160	173	145	150	151	110	106	119	96	97	73	147	149	159	119	27	42	53	34	23	86	30	24	13	5	2	13	12	2	5	10	18	20	54	34	35	66	58
CH151	B2.9	006_bR VCe	54	75	104	88	86	113	138	142	145	137	145	106	100	89	75	67	63	40	49	25	11	11	13	14	39	3	6	3	32	21	9	7	0	0	0	0	0	0	0	5	6	0	0	21	27	23	26
CH152	B2.10	006_bR VCe	41	76	84	75	71	111	115	130	136	135	136	102	89	71	73	79	44	37	42	15	17	22	7	12	4	2	7	2	2	17	3	9	0	0	0	0	2	6	5	3	8	16	14	16	24	40	55
CH153	B2.11	006_bR VCe	49	119	125	125	138	132	147	129	149	142	136	122	123	113	125	119	110	117	81	73	103	73	28	59	62	28	29	30	27	35	30	17	2	0	5	0	0	0	0	2	21	19	49	67	132	148	145
CH155	C2.8	009_bR 750ex	11	10	14	20	24	26	28	23	22	34	54	62	79	54	49	74	84	80	83	102	113	74	76	80	66	53	40	37	42	45	38	34	30	48	79	83	74	71	76	73	82	81	79	83	75	69	84
CH156	C2.9	009_bR 750ex	58	104	71	84	69	49	59	70	71	74	101	129	121	117	109	141	131	145	153	108	103	93	79	114	143	160	121	101	139	211	176	124	149	169	195	158	127	192	166	130	171	203	172	98	137	92	49
CH157	C2.10	009_bR 750ex	45	25	18	29	46	17	18	23	61	41	62	64	71	47	55	84	79	47	81	77	61	49	53	51	50	73	55	40	73	74	37	47	16	50	38	71	10	54	85	9	37	12	2	0	1	1	4
CH158	C2.11	009_bR 750ex	28	33	20	45	44	24	13	38	23	58	31	66	38	49	40	35	38	42	64	51	55	65	58	36	52	93	47	43	44	58	85	41	51	16	10	10	7	12	1	0	7	2	0	0	12	3	1
CH159	C2.12	009_bR 750ex	61	55	42	35	29	37	50	34	17	34	57	30	29	15	42	49	38	53	33	37	28	63	43	73	47	44	37	41	37	18	44	56	41	37	91	56	47	63	115	72	123	41	0	2	3	8	20
CH160	A2.13	001_bL VCe	27	74	79	81	97	108	97	114	96	106	117	126	113	119	117	143	133	155	166	184	181	190	177	182	196	172	184	190	171	190	184	223	197	198	209	215	224	207	226	207	198	198	189	192	182	213	202
CH161	A2.14	001_bL VCe	111	140	116	118	114	130	114	139	141	146	127	140	135	124	128	133	136	155	129	158	112	122	77	76	31	46	43	48	12	1	0	14	2	1	2	6	2	3	2	13	14	36	72	83	85	99	131
CH162	A2.15	001_bL VCe	60	154	131	144	161	160	163	175	177	170	155	142	120	115	163	141	130	129	109	140	152	163	166	124	51	29	12	5	3	1	6	6	3	0	3	0	5	0	3	4	33	61	52	87	68	90	117
CH163	A2.16	001_bL VCe	93	147	132	127	154	152	148	150	146	149	137	142	142	145	151	132	115	140	117	121	117	135	156	184	172	173	185	199	190	191	231	188	225	225	195	113	49	94	73	102	91	138	134	182	193	172	142
CH166	B2.12	006_bR VCe	40	96	91	83	95	92	125	102	112	101	101	87	91	88	62	52	61	46	37	68	57	33	57	27	19	13	26	36	24	86	58	53	32	18	37	25	12	14	32	37	102	101	78	98	139	150	138
CH167	B2.13	006_bR VCe	73	133	96	120	128	144	155	143	177	192	167	162	104	153	144	117	163	124	112	88	60	59	46	89	33	37	4	7	3	5	1	5	8	3	0	0	0	2	0	2	2	6	35	40	54	71	71
CH168	B2.14	006_bR VCe	53	121	121	124	133	131	170	153	182	154	134	153	164	140	117	130	126	93	93	85	57	36	44	53	31	56	60	23	10	7	22	20	15	2	11	0	0	6	3	13	19	34	62	78	128	107	124
CH169	B2.15	006_bR VCe	36	80	83	84	100	133	119	103	114	117	107	87	90	101	63	83	95	78	92	90	148	125	105	140	154	141	167	178	176	192	197	198	219	220	226	225	203	184	228	236	243	248	216	221	215	201	226
CH172	C2.13	009_bR 750ex	61	68	66	73	97	78	83	34	48	49	54	81	104	96	108	90	111	83	110	92	89	120	145	151	110	124	124	151	135	149	128	133	159	115	141	133	164	177	174	192	172	201	175	196	180	168	171
CH173	C2.14	009_bR 750ex	50	59	46	52	81	63	42	79	107	126	83	103	53	92	95	67	72	91	72	93	101	89	71	85	91	84	44	50	95	51	84	82	90	27	16	84	65	86	96	85	76	22	19	78	44	2	7
CH174	C2.15	009_bR 750ex	102	70	54	87	65	67	45	22	68	93	107	102	100	98	82	75	87	99	90	65	34	83	132	130	32	89	81	101	60	69	43	50	80	47	101	152	134	72	144	131	42	29	149	179	148	225	264
CH175	C2.16	009_bR 750ex	15	5	6	0	4	3	2	4	3	5	8	7	10	17	16	13	13	10	20	12	27	13	21	26	23	20	36	30	22	11	67	32	37	38	71	73	55	72	93	124	110	89	108	58	58	78	74
CH208	A3.0	002_bL 300ug CBD	127	126	95	115	100	149	133	159	166	151	189	162	205	200	184	193	198	199	211	208	249	219	243	239	251	226	234	259	248	232	228	243	237	241	240	247	219	193	216	237	210	216	241	217	229	228	195
CH209	A3.1	002_bL 300ug CBD	56	84	79	100	131	102	91	83	105	110	95	104	121	102	103	86	62	103	74	125	96	111	169	128	78	159	71	94	136	107	104	106	147	152	172	125	138	177	200	199	226	230	255	233	221	188	84
CH210	A3.2	002_bL 300ug CBD	64	75	36	55	74	64	78	92	79	107	101	90	117	108	100	83	87	96	61	66	94	120	112	30	44	105	94	57	23	57	22	38	13	15	4	11	5	7	13	18	20	4	0	6	15	21	50
CH211	A3.3	002_bL 300ug CBD	36	80	36	53	65	40	45	77	65	71	57	80	65	32	45	51	66	25	29	44	58	16	47	38	19	18	4	19	11	17	0	26	8	9	2	16	7	4	6	17	3	5	3	6	6	9	12
CH214	B3.0	007_bR 300ex	69	100	60	77	111	96	140	121	121	137	138	115	133	137	132	161	142	118	134	165	170	132	155	140	96	131	107	139	143	121	151	111	137	178	176	210	124	112	71	27	57	161	100	108	129	161	160
CH215	B3.1	007_bR 300ex	65	91	82	97	114	108	135	113	150	119	140	114	119	116	132	117	114	113	80	97	154	92	89	105	100	66	55	107	34	94	115	169	156	176	43	16	0	19	1	18	31	97	52	26	81	117	79
CH216	B3.2	007_bR 300ex	84	87	77	61	94	100	88	136	99	123	110	120	85	115	93	100	108	67	97	39	89	45	43	71	56	56	39	32	40	31	11	12	2	4	0	3	0	0	7	0	3	4	20	10	12	32	15
CH217	B3.3	007_bR 300ex	45	90	86	40	81	59	52	73	85	97	84	97	76	83	78	63	82	74	29	81	140	112	35	66	62	67	148	82	37	13	45	21	26	4	0	0	0	33	3	0	3	3	43	16	22	47	79
CH220	C3.0	008_bR 500ex	12	6	4	4	11	9	2	2	0	0	0	0	0	0	0	0	0	0	0	0	0	0	0	0	0	0	0	0	0	0	0	6	0	0	0	0	0	0	0	0	0	1	0	0	1	5	3
CH221	C3.1	008_bR 500ex	16	8	3	2	9	9	2	3	0	0	0	0	0	0	0	0	0	0	0	0	0	0	0	0	0	0	0	0	0	0	0	4	0	0	0	0	0	0	0	0	0	0	0	0	0	1	7
CH222	C3.2	008_bR 500ex	11	5	5	3	9	8	2	2	0	0	0	0	0	0	0	0	0	0	0	0	0	0	0	0	0	0	0	0	0	0	0	5	0	0	0	0	0	0	0	0	0	0	0	0	0	2	7
CH223	C3.3	008_bR 500ex	5	2	5	3	7	4	1	2	0	0	0	0	0	0	0	0	0	0	0	0	0	0	0	0	0	0	0	0	0	0	0	4	0	0	0	0	0	0	0	0	0	0	0	0	0	3	2
CH224	A3.4	002_bL 300ug CBD	74	97	66	62	72	83	140	102	106	107	74	107	105	114	124	112	94	110	79	113	81	58	89	36	81	40	53	57	73	63	99	110	143	109	32	77	85	100	60	48	64	20	28	63	64	159	105
CH225	A3.5	002_bL 300ug CBD	44	50	39	31	39	74	44	58	68	83	79	87	77	86	64	68	72	82	65	56	35	45	38	28	16	6	29	32	41	40	28	23	28	17	15	16	0	1	3	0	2	8	11	3	11	32	20
CH226	A3.6	002_bL 300ug CBD	39	38	31	40	53	51	64	88	77	61	54	57	60	53	81	53	36	31	21	34	15	57	50	53	61	28	50	14	1	4	26	20	7	11	4	0	0	0	0	13	4	0	8	9	10	60	48
CH227	A3.7	002_bL 300ug CBD	91	86	42	51	59	98	46	93	93	86	64	101	76	85	73	56	47	39	41	30	31	44	27	26	9	50	22	32	37	7	8	3	4	2	5	33	22	3	4	35	21	5	0	5	7	7	13
CH228	A3.8	002_bL 300ug CBD	69	50	60	58	44	79	76	92	111	109	102	80	107	110	77	66	76	68	106	38	60	66	67	29	26	7	27	8	25	7	28	51	51	12	29	5	6	24	88	101	87	61	63	49	85	67	58
CH230	B3.4	007_bR 300ex	41	84	60	84	92	116	130	140	157	137	161	161	124	157	129	137	122	122	116	104	80	68	95	111	69	79	126	92	115	136	129	98	145	140	110	103	116	126	114	41	76	105	118	175	151	150	158
CH231	B3.5	007_bR 300ex	17	56	33	34	69	41	95	99	112	94	104	112	101	93	90	98	94	96	50	60	68	41	49	36	58	41	35	53	61	44	18	54	73	97	107	55	9	33	79	88	41	50	27	40	56	103	103
CH232	B3.6	007_bR 300ex	40	72	38	52	60	91	87	118	76	93	87	105	98	78	89	87	83	91	59	59	44	46	46	71	38	53	36	57	33	18	5	17	8	22	14	24	9	5	4	2	0	7	6	9	22	51	55
CH233	B3.7	007_bR 300ex	45	76	106	71	90	81	117	96	102	84	79	59	76	82	98	65	84	88	81	107	47	56	44	35	69	43	40	68	42	36	14	20	72	25	27	6	2	0	0	2	0	2	2	37	34	34	45
CH235	C3.4	008_bR 500ex	13	12	5	4	16	11	3	2	0	0	0	0	0	0	0	0	0	0	0	0	0	0	0	0	0	0	0	0	1	0	0	8	0	0	0	0	0	1	0	0	0	1	0	0	2	6	4
CH236	C3.5	008_bR 500ex	14	7	5	3	10	11	1	1	0	0	0	0	0	0	0	0	0	0	0	0	0	0	0	0	0	0	0	0	1	0	0	8	0	0	0	0	0	0	0	0	0	0	0	0	1	7	7
CH237	C3.6	008_bR 500ex	11	4	5	2	9	8	2	2	0	0	0	0	0	0	0	0	0	0	0	0	0	0	0	0	0	0	0	0	0	0	0	4	0	0	0	0	0	0	0	0	0	0	0	0	0	1	3
CH238	C3.7	008_bR 500ex	9	4	3	3	8	7	2	3	0	0	0	0	0	0	0	0	0	0	0	0	0	0	0	0	0	0	0	0	0	0	0	4	0	0	0	0	0	0	0	0	0	0	0	0	0	1	4
CH239	C3.8	008_bR 500ex	17	11	6	4	9	9	2	4	0	0	0	0	0	0	0	0	0	0	0	0	0	0	0	0	0	0	0	0	0	0	0	4	0	0	0	2	0	1	0	0	0	0	0	0	2	6	6
CH240	A3.9	002_bL 300ug CBD	95	100	156	149	142	144	131	131	111	149	160	138	136	144	132	159	130	152	171	160	148	155	165	133	156	187	175	192	172	163	195	202	209	215	234	206	235	219	224	246	252	229	256	239	254	248	211
CH241	A3.10	002_bL 300ug CBD	71	76	55	38	67	89	101	94	60	91	79	66	99	89	80	71	73	78	68	73	66	25	55	40	64	53	37	25	32	28	10	25	26	27	21	10	0	2	5	7	2	7	6	30	19	47	53
CH242	A3.11	002_bL 300ug CBD	79	82	51	41	62	68	93	89	98	83	89	78	60	77	61	67	66	52	45	36	50	39	63	57	46	17	52	22	35	61	15	21	36	64	63	22	7	21	43	64	38	29	4	2	15	46	113
CH243	A3.12	002_bL 300ug CBD	71	48	93	102	61	89	110	82	118	87	96	79	83	74	65	93	90	59	39	25	58	33	44	20	23	14	35	0	4	0	4	10	0	8	30	2	10	5	14	36	2	5	2	20	15	20	8
CH244	A3.13	002_bL 300ug CBD	18	22	23	21	24	19	28	24	40	35	35	53	45	47	40	32	43	28	25	33	44	54	34	29	51	58	66	49	31	48	47	39	62	59	115	99	118	111	153	166	170	197	174	179	165	172	187
CH246	B3.8	007_bR 300ex	58	88	90	56	106	103	120	133	128	137	129	129	125	129	141	138	160	116	132	129	162	92	73	151	139	140	82	95	136	88	114	81	141	103	78	79	101	70	41	14	32	83	136	173	186	137	164
CH247	B3.9	007_bR 300ex	44	56	54	59	69	116	101	107	110	112	96	71	79	108	83	84	72	84	65	78	61	55	40	79	109	64	66	75	76	133	131	177	154	175	200	165	141	119	150	144	125	161	144	147	83	80	80
CH248	B3.10	007_bR 300ex	38	73	80	58	100	103	68	93	109	104	100	116	118	87	110	73	77	79	82	57	67	78	89	107	106	85	75	56	39	49	25	65	78	4	4	23	12	19	14	65	122	198	192	236	195	192	215
CH249	B3.11	007_bR 300ex	46	89	82	82	74	83	48	95	107	101	89	90	73	96	114	70	87	85	113	62	54	37	36	33	34	39	18	16	15	6	12	55	36	6	9	30	20	9	0	5	20	28	27	54	62	119	124
CH251	C3.9	008_bR 500ex	12	11	5	2	7	10	2	5	0	0	0	0	0	0	0	0	0	0	0	0	0	0	0	0	0	0	0	0	0	0	0	9	0	0	0	0	0	0	0	0	0	0	0	0	0	3	0
CH252	C3.10	008_bR 500ex	16	11	11	11	13	15	11	10	0	0	1	2	0	0	0	0	2	0	0	0	0	0	0	0	0	0	0	0	3	4	1	12	2	2	0	7	1	4	1	2	1	3	1	0	11	15	11
CH253	C3.11	008_bR 500ex	10	5	4	2	9	7	2	2	0	0	0	0	0	0	0	0	0	0	0	0	0	0	0	0	0	0	0	0	0	0	0	6	0	0	0	0	0	0	0	0	0	0	0	0	0	2	4
CH254	C3.12	008_bR 500ex	18	10	6	3	11	11	2	3	0	0	0	0	0	0	0	0	0	0	0	0	0	0	0	0	0	0	0	0	0	0	0	4	0	0	0	0	0	0	0	0	0	0	0	0	0	1	7
CH255	C3.13	008_bR 500ex	16	11	5	4	9	8	2	4	0	0	0	0	0	0	0	0	0	0	0	0	0	0	0	0	0	0	0	0	3	0	0	6	0	1	0	2	0	1	0	0	0	1	0	0	3	8	8
CH257	A3.14	002_bL 300ug CBD	49	107	72	80	82	73	60	86	112	66	71	63	99	78	68	99	109	106	67	57	38	61	120	52	68	70	50	107	73	70	67	73	72	63	68	95	93	109	37	25	18	46	46	67	75	41	63
CH258	A3.15	002_bL 300ug CBD	54	54	63	84	63	53	61	79	89	101	118	94	91	71	83	73	53	48	57	35	42	36	27	20	9	22	8	14	7	8	4	15	12	11	0	0	3	0	3	5	4	5	0	5	7	17	10
CH259	A3.16	002_bL 300ug CBD	75	123	129	89	60	83	103	85	116	105	102	85	88	95	77	76	116	160	102	84	85	91	82	35	35	68	75	25	17	19	7	16	11	3	9	2	4	5	25	0	16	28	21	51	54	82	115
CH262	B3.12	007_bR 300ex	44	56	46	73	78	68	103	96	98	75	95	82	78	81	70	81	59	66	68	69	74	68	59	87	86	74	66	42	73	71	117	59	42	12	31	41	58	78	31	19	20	26	41	59	77	69	129
CH263	B3.13	007_bR 300ex	71	87	98	132	137	93	133	102	116	122	88	94	103	76	87	90	75	50	78	72	138	91	177	93	37	106	33	18	47	47	67	51	26	4	10	17	2	7	8	4	4	5	9	42	20	85	103
CH264	B3.14	007_bR 300ex	74	98	73	92	76	101	79	60	90	92	73	94	108	83	105	63	51	102	77	70	57	51	42	43	29	61	96	120	62	26	29	4	6	4	5	7	0	3	2	4	5	4	25	10	45	42	75
CH265	B3.15	007_bR 300ex	31	40	21	40	28	34	38	55	33	64	50	50	52	53	53	42	47	46	54	41	67	64	32	28	52	48	47	65	68	23	44	75	92	57	21	4	8	22	12	10	17	22	63	71	91	90	74
CH268	C3.14	008_bR 500ex	8	4	4	2	8	3	1	2	0	0	0	0	0	0	0	0	0	0	0	0	0	0	0	0	0	0	0	0	0	0	0	4	0	0	0	0	0	0	0	0	0	0	0	0	0	1	5
CH269	C3.15	008_bR 500ex	15	11	13	9	16	10	7	7	0	0	0	0	0	0	0	0	1	0	0	0	0	0	1	0	0	0	1	1	2	3	2	7	2	2	1	4	1	3	0	1	0	6	0	0	8	11	21
CH270	C3.16	008_bR 500ex	10	6	5	4	11	7	0	3	0	0	0	0	0	0	0	0	0	0	0	0	0	0	0	0	0	0	0	0	0	0	0	8	0	0	0	0	0	0	0	0	0	0	0	0	1	5	5
CH289	A4.0	003_bL 500ug CBD	17	26	29	15	27	48	52	45	35	52	37	35	50	58	62	70	65	75	76	83	69	61	19	48	79	82	109	76	51	57	104	75	51	21	54	25	47	53	30	13	4	1	1	8	8	31	16
CH290	A4.1	003_bL 500ug CBD	99	97	49	79	111	127	113	70	90	148	124	118	113	100	119	134	100	176	119	118	102	123	169	154	119	96	64	22	46	141	151	166	151	98	105	41	70	42	34	85	29	13	19	17	41	86	170
CH295	B4.0	008_bR 500ex	53	47	48	55	73	111	127	106	113	87	78	98	103	81	82	93	57	82	75	109	60	107	113	129	110	124	77	51	65	82	158	113	100	87	56	81	155	73	78	114	92	93	73	42	35	52	64
CH296	B4.1	008_bR 500ex	65	106	46	124	89	104	73	93	102	103	83	126	140	87	131	98	172	136	115	96	108	105	60	64	51	85	53	40	47	50	76	118	75	30	118	140	80	168	195	71	86	144	186	133	117	95	75
CH301	C4.0	008_bR 500ex	6	4	3	3	5	5	1	1	0	0	0	0	0	0	0	0	0	0	0	0	0	0	0	0	0	0	0	0	0	0	0	7	0	0	0	0	0	0	0	0	0	0	0	0	0	5	6
CH302	C4.1	008_bR 500ex	14	9	8	6	9	6	2	3	0	0	0	0	0	0	0	0	0	0	0	0	0	0	0	0	0	0	0	0	6	0	0	11	0	0	0	0	0	0	0	0	0	0	0	0	1	4	5
CH304	A4.2	003_bL 500ug CBD	53	74	122	113	108	115	127	127	135	96	98	125	120	114	159	134	164	128	147	169	204	195	218	213	197	188	217	209	197	220	190	209	218	203	223	221	211	246	225	243	236	245	241	253	232	239	222
CH305	A4.3	003_bL 500ug CBD	47	62	65	44	35	38	34	33	38	52	70	54	70	76	70	107	109	112	100	94	123	106	80	79	68	90	92	67	86	81	33	36	42	58	41	66	89	64	96	71	78	53	34	7	27	29	55
CH306	A4.4	003_bL 500ug CBD	65	33	58	56	36	34	56	80	70	84	91	66	110	114	130	141	140	114	96	115	99	117	118	148	88	113	75	153	158	207	194	193	188	182	208	199	195	192	175	204	212	225	225	211	199	203	207
CH307	A4.5	003_bL 500ug CBD	109	60	98	101	91	77	79	93	77	77	47	92	99	78	64	94	92	82	54	69	98	132	84	87	76	48	53	88	27	36	13	16	1	17	49	40	2	9	16	1	1	7	0	5	1	7	15
CH310	B4.2	008_bR 500ex	107	120	76	146	116	111	123	108	121	116	104	154	147	133	104	142	162	123	83	146	182	130	133	130	126	160	181	142	104	189	203	213	205	161	210	161	208	175	80	112	90	142	178	189	224	218	226
CH311	B4.3	008_bR 500ex	83	55	72	65	66	69	69	57	96	70	85	94	105	133	136	124	111	132	112	137	97	79	61	37	52	82	103	66	49	83	68	53	45	109	96	35	23	35	15	8	1	3	2	28	8	42	52
CH312	B4.4	008_bR 500ex	59	58	33	56	38	72	44	72	80	89	76	58	90	113	101	86	63	75	72	46	46	49	62	55	17	54	44	7	23	14	25	28	42	9	47	29	22	6	23	0	4	3	2	10	4	6	45
CH313	B4.5	008_bR 500ex	42	57	47	97	77	78	85	69	62	72	34	80	52	71	59	88	90	82	31	79	66	28	52	54	57	33	81	131	39	55	32	37	23	11	5	5	7	4	14	61	19	16	2	4	19	21	14
CH316	C4.2	008_bR 500ex	19	13	15	8	13	12	8	4	0	0	0	0	0	0	2	1	0	1	1	0	0	0	0	1	0	0	0	0	11	2	2	14	5	1	0	1	1	1	1	2	1	0	1	0	4	7	14
CH317	C4.3	008_bR 500ex	12	8	9	4	15	14	1	3	0	0	0	0	0	0	0	0	0	0	0	0	0	0	0	0	0	0	0	0	6	0	0	12	0	0	0	0	0	0	0	0	0	0	0	0	2	2	9
CH318	C4.4	008_bR 500ex	5	2	1	2	4	2	1	0	0	0	0	0	0	0	0	0	0	0	0	0	0	0	0	0	0	0	0	0	0	0	0	4	0	0	0	0	0	0	0	0	0	0	0	0	0	1	5
CH319	C4.5	008_bR 500ex	18	10	10	5	13	11	5	4	0	0	0	0	0	0	1	0	1	0	0	0	0	0	0	0	0	0	0	0	8	1	0	10	0	0	0	0	0	0	1	1	0	1	0	0	2	3	10
CH320	A4.6	003_bL 500ug CBD	80	71	58	61	95	77	94	75	136	116	70	99	34	87	76	66	89	72	70	87	82	55	48	54	17	63	54	71	62	62	21	24	38	58	24	0	13	7	5	39	0	10	0	2	8	25	19
CH321	A4.7	003_bL 500ug CBD	50	52	67	59	42	51	52	26	44	57	16	47	37	40	59	81	51	34	34	38	44	42	44	29	0	29	54	52	28	13	12	17	24	5	20	29	18	10	0	0	4	7	0	1	3	18	6
CH322	A4.8	003_bL 500ug CBD	33	16	33	21	17	22	27	23	16	19	19	21	21	21	16	24	22	29	48	22	13	14	22	8	10	3	4	15	12	10	16	15	10	6	6	0	0	0	0	0	1	2	0	9	0	8	9
CH323	A4.9	003_bL 500ug CBD	60	43	39	37	43	46	16	48	41	82	77	96	82	71	98	92	59	65	58	69	73	63	33	52	58	64	91	85	59	53	62	47	24	74	43	31	3	2	4	2	0	8	0	0	3	2	9
CH324	A4.10	003_bL 500ug CBD	13	18	23	13	9	21	27	35	32	40	48	35	35	31	54	35	27	40	32	43	34	25	43	64	40	12	24	14	9	10	33	48	31	42	50	44	36	47	13	16	36	33	54	76	97	124	189
CH326	B4.6	008_bR 500ex	84	86	57	75	115	105	88	74	69	78	98	109	94	116	105	133	109	134	146	123	62	128	170	140	100	116	122	117	108	112	53	142	84	75	115	131	95	88	114	65	52	56	38	43	48	67	33
CH327	B4.7	008_bR 500ex	42	34	36	22	34	38	50	32	76	53	57	65	79	96	71	80	54	80	64	58	51	65	67	64	47	46	70	39	29	29	41	57	69	103	78	40	41	73	40	2	23	47	63	120	91	81	71
CH328	B4.8	008_bR 500ex	57	60	27	63	42	57	64	105	89	97	72	75	97	63	81	60	68	85	61	98	62	64	63	68	62	71	42	45	66	59	18	65	28	3	8	25	20	116	28	3	36	46	15	17	0	14	14
CH329	B4.9	008_bR 500ex	37	56	54	65	64	49	92	116	102	99	99	82	87	54	81	97	70	64	38	65	64	62	43	51	62	27	33	20	22	34	44	50	11	18	3	22	0	4	77	81	64	37	22	4	5	42	25
CH331	C4.6	008_bR 500ex	8	6	4	2	9	7	1	1	0	0	0	0	0	0	0	0	0	0	0	0	0	0	0	0	0	0	0	0	1	0	0	9	0	0	0	0	0	0	0	0	0	0	0	0	0	1	9
CH332	C4.7	008_bR 500ex	20	13	15	7	16	15	6	5	0	1	1	2	0	1	1	0	1	2	0	0	0	0	0	0	0	0	0	2	6	4	0	12	1	4	1	1	2	0	2	2	1	4	0	2	3	6	12
CH333	C4.8	008_bR 500ex	16	7	6	3	9	10	2	3	0	0	0	0	0	0	0	0	0	0	0	0	0	0	0	0	0	0	0	0	1	0	0	8	0	0	0	0	0	0	0	0	0	0	0	0	0	3	7
CH334	C4.9	008_bR 500ex	14	6	6	6	9	6	1	2	0	0	0	0	0	0	0	0	0	0	0	0	0	0	0	0	0	0	0	0	5	0	0	11	0	0	0	0	0	0	0	0	0	0	0	0	1	3	7
CH335	C4.10	008_bR 500ex	15	10	10	2	10	10	3	3	0	0	0	0	0	0	0	0	0	0	0	0	0	0	0	0	0	0	0	1	3	1	0	12	0	0	0	0	0	1	0	0	0	2	0	0	4	5	8
CH336	A4.11	003_bL 500ug CBD	122	158	140	177	152	160	86	42	44	42	63	59	52	48	95	38	39	44	73	70	78	102	82	44	63	23	39	35	27	49	92	67	73	30	60	47	44	28	134	168	181	135	15	5	4	16	17
CH337	A4.12	003_bL 500ug CBD	36	30	36	31	37	23	39	51	33	32	28	38	24	33	27	27	20	35	19	7	17	24	13	10	24	16	23	8	12	2	0	12	6	11	5	2	0	4	4	7	0	3	3	0	0	8	9
CH338	A4.13	003_bL 500ug CBD	61	40	69	55	25	35	59	43	56	51	47	24	21	32	43	43	64	51	63	54	45	35	57	38	40	32	16	21	39	54	20	46	30	34	12	26	62	8	21	0	4	0	0	9	0	8	12
CH339	A4.14	003_bL 500ug CBD	64	63	53	75	52	73	64	39	31	66	79	63	47	73	79	66	57	74	46	72	70	50	71	36	42	24	44	33	43	33	32	38	107	92	116	173	242	235	192	110	82	91	97	72	21	27	40
CH342	B4.10	008_bR 500ex	88	101	83	142	144	130	101	124	138	114	79	67	85	102	74	56	50	64	79	129	34	49	53	79	62	68	76	78	37	55	44	87	61	63	42	35	41	8	43	17	20	37	12	11	37	24	21
CH343	B4.11	008_bR 500ex	45	89	56	56	49	53	41	80	83	73	78	83	57	57	77	89	88	91	77	66	65	50	82	63	77	35	44	71	59	116	112	56	10	36	4	1	5	1	1	4	1	0	7	13	5	9	13
CH344	B4.12	008_bR 500ex	52	79	52	59	59	43	99	77	93	82	82	82	43	62	93	68	78	105	81	112	95	117	62	69	47	44	70	70	28	52	110	96	44	28	35	37	56	112	151	193	147	195	209	203	205	102	50
CH345	B4.13	008_bR 500ex	70	85	55	67	24	58	63	60	56	38	40	78	43	55	41	39	46	38	34	78	57	36	51	33	20	29	31	78	52	92	118	92	41	8	11	13	30	15	11	41	15	8	0	8	44	56	56
CH348	C4.11	008_bR 500ex	21	15	24	13	20	27	15	9	0	1	0	0	0	0	0	0	2	0	0	1	0	0	0	0	0	0	0	0	0	2	1	10	3	4	1	7	1	2	0	0	0	5	1	0	6	11	18
CH349	C4.12	008_bR 500ex	20	15	13	6	14	14	4	4	1	2	1	4	3	1	5	1	6	5	3	0	0	0	0	2	1	1	3	2	15	12	0	17	2	3	4	2	2	3	5	4	3	6	1	2	4	7	12
CH350	C4.13	008_bR 500ex	9	9	6	5	8	5	1	2	0	0	0	0	0	0	0	0	0	0	0	0	0	0	0	0	0	0	0	0	2	0	0	5	0	0	0	0	0	0	0	0	0	0	0	0	1	3	8
CH351	C4.14	008_bR 500ex	18	10	10	6	16	12	7	4	0	0	1	1	1	0	1	0	1	0	1	0	0	0	0	2	0	0	1	2	8	4	1	16	0	5	3	0	2	1	3	4	1	2	1	0	3	7	11
CH353	A4.15	003_bL 500ug CBD	112	138	96	147	147	99	74	105	101	128	104	115	179	131	144	59	68	56	132	168	114	103	80	92	123	140	94	123	51	72	94	89	165	127	177	126	176	166	143	120	190	162	87	118	147	151	143
CH354	A4.16	003_bL 500ug CBD	69	40	56	42	58	44	58	60	106	64	80	98	81	70	46	40	47	16	50	47	61	87	115	82	37	66	54	105	54	104	126	169	112	32	137	40	46	74	37	13	10	4	0	9	3	12	12
CH359	B4.14	008_bR 500ex	108	105	118	59	91	82	73	54	72	53	69	109	86	94	135	101	103	93	161	104	99	134	115	104	137	165	112	67	78	33	43	120	186	178	204	69	29	18	2	28	6	3	2	8	74	92	84
CH360	B4.15	008_bR 500ex	108	68	86	55	49	109	47	92	53	51	33	109	64	44	112	54	78	62	72	43	120	78	68	82	72	102	130	66	43	33	83	24	62	86	10	74	52	4	1	12	5	10	5	2	9	39	122
CH365	C4.15	008_bR 500ex	16	6	8	5	11	9	3	4	0	0	0	0	0	0	1	0	0	1	0	0	0	0	0	0	0	0	0	2	7	3	0	10	0	2	0	0	0	1	1	0	1	2	0	0	4	5	11
CH366	C4.16	008_bR 500ex	8	4	3	2	5	3	1	1	0	0	0	0	0	0	0	0	0	0	0	0	0	0	0	0	0	0	0	0	0	0	0	9	0	0	0	0	0	0	0	0	0	0	0	0	0	1	6
[truncated: 3 more columns]

## Sheet: wDAT+ CBD ex2
DATE:	2023-11-10 15:11:02
FILE:	C:\Users\wmicrotracker\Desktop\wmicrotracker\p00020\20231108_2029
SUBPROJECT:	2023 wDAT+ d2-3 CBD ex2 bL
<<<<<< Group Activity: Average Activity Counts per Data Interval>>>>>>
Group/Time[m]	30	60	90	120	150	180	210	240	270	300	330	360	390	420	450	480	510	540	570	600	630	660	690	720	750	780	810	840	870	900	930	960	990	1020	1050	1080	1110	1140	1170	1200	1230	1260	1290	1320	1350	1380	1410	1440	1470
0.1%Tw80	76	66	67	50	48	40	38	40	40	40	42	45	54	66	76	84	93	98	104	105	110	108	117	109	98	101	88	86	84	81	79	78	82	89	99	115	120	141	152	162	165	166	172	168	175	176	174	180	177
001_VCe	70	68	60	45	47	42	40	32	32	34	42	52	78	86	96	102	106	110	108	110	102	101	95	110	96	96	92	82	72	66	62	62	70	90	107	123	142	159	163	172	174	173	175	176	176	174	179	181	175
300ug CBD	72	68	51	42	40	35	37	33	37	38	36	43	32	38	37	30	38	42	55	66	72	74	90	100	98	108	94	98	103	100	96	92	88	85	78	82	76	70	70	77	83	91	104	119	136	152	162	160	171
500ug CBD	67	70	58	40	44	45	42	52	44	38	44	44	44	47	51	60	50	50	44	53	58	60	68	74	81	94	93	100	102	104	117	116	113	108	108	112	102	108	104	100	98	104	105	112	114	126	127	141	160
750ug CBD	74	51	43	41	47	49	50	46	53	46	48	50	45	49	42	43	49	49	46	45	42	41	44	42	38	38	38	40	50	61	72	79	95	96	94	96	96	96	98	91	92	87	77	82	80	83	77	76	80
Time	28.5	29	29.5	30	30.5	31	31.5	32	32.5	33	33.5	34	34.5	35	35.5	36	36.5	37	37.5	38	38.5	39	39.5	40	40.5	41	41.5	42	42.5	43	43.5	44	44.5	45	45.5	46	46.5	47	47.5	48	48.5	49	49.5	50	50.5	51	51.5	52	52.5
<<<<<< Group Activity: Standard Error >>>>>>
Group/Time[m]	30	60	90	120	150	180	210	240	270	300	330	360	390	420	450	480	510	540	570	600	630	660	690	720	750	780	810	840	870	900	930	960	990	1020	1050	1080	1110	1140	1170	1200	1230	1260	1290	1320	1350	1380	1410	1440	1470
000_0.1%Tw80	1.7	2.9	5.8	6.4	7.5	8.1	6.9	2.3	4.6	1.2	1.7	2.3	5.2	4.6	3.5	2.3	1.7	1.7	5.2	2.9	6.4	7.5	5.8	5.8	9.2	6.4	5.8	12.7	12.1	11	9.2	12.1	8.1	6.9	2.3	2.3	1.2	1.2	5.8	2.9	5.2	4	4.6	4	6.4	5.8	5.2	5.8	5.2
001_VCe	5.7	1.4	5.7	7.1	2.8	7.8	7.1	10.6	6.4	10.6	12.7	14.8	16.3	12.7	10.6	9.2	12	3.5	9.2	9.2	4.2	5.7	5.7	7.8	4.2	17	16.3	6.4	13.4	9.2	8.5	2.8	4.9	11.3	9.2	0.7	9.2	9.2	2.8	2.8	3.5	5.7	2.1	7.1	7.8	7.8	7.1	5.7	4.2
002_300ug CBD	5.7	2.8	5.7	8.5	4.2	4.9	2.8	0	0.7	0.7	0.7	12	6.4	2.8	2.1	0.7	4.2	4.9	2.1	2.8	2.8	1.4	2.8	0.7	7.8	4.2	5.7	7.1	7.1	3.5	12.7	7.8	8.5	2.8	7.8	5.7	6.4	11.3	10.6	7.8	2.8	2.8	5.7	9.9	9.2	9.2	6.4	0.7	4.2
003_500ug CBD	0.7	7.8	15.6	2.1	0.7	2.8	5.7	2.8	9.2	9.9	5.7	9.2	5.7	9.9	14.1	7.8	12	10.6	11.3	2.8	6.4	9.2	2.8	0.7	2.1	2.1	0.7	2.1	2.8	4.2	2.8	9.2	2.8	2.1	2.1	1.4	4.2	4.2	11.3	7.8	4.2	1.4	7.1	2.1	1.4	4.2	0	2.1	1.4
004_750ug CBD	3.5	5.8	6.9	8.7	3.5	9.2	8.1	6.9	8.7	2.9	6.4	5.2	4	8.1	8.1	5.2	2.9	3.5	1.7	1.2	3.5	8.1	5.8	3.5	3.5	5.2	5.2	5.2	8.7	5.8	4.6	6.9	4.6	5.8	5.8	5.2	4.6	4.6	3.5	6.4	3.5	4.6	5.2	6.4	3.5	9.2	8.1	5.2	2.9
<<<<<< Group Activity: Number of wells/group >>>>>>
Group/Time[m]	30	60	90	120	150	180	210	240	270	300	330	360	390	420	450	480	510	540	570	600	630	660	690	720	750	780	810	840	870	900	930	960	990	1020	1050	1080	1110	1140	1170	1200	1230	1260	1290	1320	1350	1380	1410	1440	1470
000_0.1%Tw80	3	3	3	3	3	3	3	3	3	3	3	3	3	3	3	3	3	3	3	3	3	3	3	3	3	3	3	3	3	3	3	3	3	3	3	3	3	3	3	3	3	3	3	3	3	3	3	3	3
001_VCe	2	2	2	2	2	2	2	2	2	2	2	2	2	2	2	2	2	2	2	2	2	2	2	2	2	2	2	2	2	2	2	2	2	2	2	2	2	2	2	2	2	2	2	2	2	2	2	2	2
002_300ug CBD	2	2	2	2	2	2	2	2	2	2	2	2	2	2	2	2	2	2	2	2	2	2	2	2	2	2	2	2	2	2	2	2	2	2	2	2	2	2	2	2	2	2	2	2	2	2	2	2	2
003_500ug CBD	2	2	2	2	2	2	2	2	2	2	2	2	2	2	2	2	2	2	2	2	2	2	2	2	2	2	2	2	2	2	2	2	2	2	2	2	2	2	2	2	2	2	2	2	2	2	2	2	2
004_750ug CBD	3	3	3	3	3	3	3	3	3	3	3	3	3	3	3	3	3	3	3	3	3	3	3	3	3	3	3	3	3	3	3	3	3	3	3	3	3	3	3	3	3	3	3	3	3	3	3	3	3
<<<<<< Number of Samples per Acquisition Interval [1unit=500values] >>>>>>
Time[m]	30	60	90	120	150	180	210	240	270	300	330	360	390	420	450	480	510	540	570	600	630	660	690	720	750	780	810	840	870	900	930	960	990	1020	1050	1080	1110	1140	1170	1200	1230	1260	1290	1320	1350	1380	1410	1440	1470
#Samples	30	30	30	30	30	30	30	30	30	30	30	30	30	30	30	30	30	30	30	30	30	30	30	30	30	30	30	30	30	30	30	30	30	30	30	30	30	30	30	30	30	30	30	30	30	30	30	30	30
<<<<<< Average Temperature [°C] >>>>>>
Time[m]	30	60	90	120	150	180	210	240	270	300	330	360	390	420	450	480	510	540	570	600	630	660	690	720	750	780	810	840	870	900	930	960	990	1020	1050	1080	1110	1140	1170	1200	1230	1260	1290	1320	1350	1380	1410	1440	1470
Temp[°C]	21.7	21.7	21.7	21.7	21.7	21.7	21.7	21.7	21.7	21.7	21.7	21.7	21.7	21.7	21.7	21.7	21.7	21.7	21.7	21.7	21.7	21.7	21.7	21.7	21.7	21.7	21.7	21.7	21.7	21.7	21.7	21.7	21.7	21.7	21.7	21.7	21.7	21.7	21.7	21.7	21.7	21.7	21.7	21.7	21.7	21.7	21.7	21.7	21.7
<<<<<< Well Activity >>>>>>
Well	Group/Time[m]	30	60	90	120	150	180	210	240	270	300	330	360	390	420	450	480	510	540	570	600	630	660	690	720	750	780	810	840	870	900	930	960	990	1020	1050	1080	1110	1140	1170	1200	1230	1260	1290	1320	1350	1380	1410	1440
A1	004_750ug CBD	76	62	57	57	54	64	65	59	66	49	56	58	50	61	58	53	48	48	46	46	48	56	56	43	43	46	45	46	56	62	75	74	90	86	86	89	87	87	91	79	85	78	67	70	75	72	61	73
B1	003_500ug CBD	68	78	74	42	45	42	36	55	53	48	49	53	50	57	65	68	62	61	55	56	64	69	71	73	79	92	92	98	99	100	114	107	110	110	106	113	106	104	93	108	102	102	112	114	115	131	127	139
C1	002_300ug CBD	66	70	57	51	44	40	34	33	38	39	37	55	38	41	35	30	43	47	57	69	75	75	93	101	106	104	99	105	110	103	109	99	96	88	86	88	82	81	80	85	86	88	98	109	127	143	155	159
A2	000_0.1%Tw80	77	64	72	59	54	51	46	39	43	37	45	49	64	74	83	89	97	102	112	108	102	114	121	99	84	92	79	79	61	61	62	68	79	78	95	120	118	143	163	164	167	170	176	170	179	181	176	179
B2	004_750ug CBD	79	46	33	29	43	51	47	42	56	49	52	51	49	51	35	36	55	55	48	46	42	38	38	47	41	40	41	44	62	70	77	92	104	105	105	106	102	99	103	100	93	94	85	91	78	76	86	86
C2	003_500ug CBD	66	62	43	38	43	48	47	49	34	28	38	34	38	37	37	53	38	40	33	50	51	51	65	75	83	96	94	102	105	108	120	126	116	106	110	110	98	113	116	92	93	105	98	110	112	122	127	143
A3	001_VCe	75	69	66	52	50	50	47	43	39	44	54	67	94	98	106	111	118	113	118	119	106	95	101	118	91	79	76	75	58	56	53	65	75	102	116	122	151	168	166	175	177	179	177	183	184	182	186	187
B3	000_0.1%Tw80	79	62	56	38	34	25	24	37	31	41	39	41	48	58	72	81	91	96	95	100	105	94	105	110	94	98	87	68	90	82	81	64	69	102	100	112	121	141	145	156	155	158	163	160	163	165	164	171
C3	004_750ug CBD	68	45	40	36	43	32	37	36	36	40	35	40	37	34	33	39	45	44	43	42	36	29	39	35	31	28	27	30	33	50	63	70	90	96	90	94	100	101	100	93	97	89	80	85	86	101	84	68
A4	002_300ug CBD	77	65	45	34	35	30	40	33	36	38	36	31	25	35	39	31	34	37	53	63	70	72	87	99	90	112	88	91	96	96	84	84	79	82	70	76	69	59	59	69	80	94	110	129	145	162	168	161
B4	001_VCe	64	66	54	38	44	34	33	22	26	23	29	37	62	73	85	93	94	106	99	101	97	107	89	102	100	113	109	88	85	75	70	59	65	79	98	124	132	150	160	169	170	167	173	169	169	167	172	175
C4	000_0.1%Tw80	73	71	73	53	57	45	43	45	47	41	41	45	49	66	73	82	92	96	104	108	122	117	124	119	115	113	99	110	102	99	94	103	97	88	102	114	121	139	147	166	172	169	177	173	184	183	182	190
<<<<<< Channel Activity >>>>>>
Channel	Well	Group/Time[m]	30	60	90	120	150	180	210	240	270	300	330	360	390	420	450	480	510	540	570	600	630	660	690	720	750	780	810	840	870	900	930	960	990	1020	1050	1080	1110	1140	1170	1200	1230	1260	1290	1320	1350	1380	1410
CH17	A1.0	004_750ug CBD	117	117	180	139	163	121	91	91	139	45	18	23	13	9	9	13	4	2	0	4	10	1	6	0	1	3	0	29	71	24	37	40	50	93	125	98	68	81	49	27	147	131	75	91	136	133	82
CH18	A1.1	004_750ug CBD	50	38	39	45	39	124	98	16	3	18	81	127	81	56	44	5	22	45	18	4	5	2	8	19	6	8	7	27	24	27	31	42	37	31	48	59	84	60	120	73	109	161	114	158	130	157	135
CH23	B1.0	003_500ug CBD	135	176	111	28	46	55	65	63	31	41	18	30	0	1	11	4	2	5	6	6	12	15	30	16	20	33	37	33	41	73	88	117	127	168	98	128	114	89	154	138	110	141	129	89	74	124	134
CH24	B1.1	003_500ug CBD	89	126	81	30	61	43	19	9	26	3	8	4	1	11	36	7	4	13	8	15	9	21	15	20	14	56	25	66	44	69	148	47	86	65	112	118	128	94	71	158	133	96	145	138	136	198	151
CH29	C1.0	002_300ug CBD	74	85	88	98	38	10	28	5	4	0	1	2	3	2	3	5	34	5	7	54	15	26	25	69	99	51	27	63	56	41	49	24	36	8	23	13	9	7	22	4	24	60	45	73	74	72	120
CH30	C1.1	002_300ug CBD	50	118	89	121	32	48	46	12	5	0	0	13	2	3	0	0	8	6	18	20	21	17	39	45	84	107	68	83	114	48	91	61	38	39	16	24	25	55	26	30	55	52	53	76	102	158	165
CH32	A1.2	004_750ug CBD	68	59	17	11	8	13	17	9	12	9	8	3	4	13	10	7	3	7	0	0	1	0	11	1	16	5	2	11	11	8	14	31	51	26	44	35	72	147	150	50	6	19	5	45	18	51	22
CH33	A1.3	004_750ug CBD	45	15	6	4	5	5	5	11	3	3	4	3	8	0	4	0	5	5	2	0	2	0	0	0	2	1	4	8	1	19	47	17	25	66	23	32	39	14	22	5	13	9	7	9	16	0	0
CH34	A1.4	004_750ug CBD	52	39	14	12	6	11	21	27	22	5	21	8	0	2	1	4	4	0	0	4	3	5	0	3	5	11	19	14	14	18	27	57	111	34	31	39	31	42	18	16	9	6	3	6	8	7	4
CH35	A1.5	004_750ug CBD	55	33	46	75	45	72	62	13	58	55	19	59	35	15	46	7	16	20	25	5	52	7	6	1	3	13	14	12	28	34	64	101	100	82	98	122	137	121	104	122	75	90	59	72	42	7	17
CH38	B1.2	003_500ug CBD	89	93	31	8	20	41	1	9	39	82	9	18	10	31	81	49	0	0	8	4	2	8	30	33	15	22	72	49	43	44	86	33	50	81	73	79	30	47	26	44	14	30	23	39	68	55	70
CH39	B1.3	003_500ug CBD	35	14	17	36	9	2	2	49	20	25	35	26	4	2	0	1	2	0	5	21	15	4	21	15	13	22	38	28	73	52	59	57	55	35	53	88	29	27	40	18	24	24	90	110	65	72	122
CH40	B1.4	003_500ug CBD	18	26	46	37	60	84	45	34	38	49	69	20	7	13	98	57	22	33	13	40	65	41	51	81	33	53	37	68	88	80	103	89	87	48	42	48	67	52	22	21	62	22	37	58	73	121	118
CH41	B1.5	003_500ug CBD	27	121	143	56	30	47	21	44	86	31	81	50	18	41	5	3	2	5	17	20	20	55	74	85	106	117	120	124	92	123	118	96	121	150	134	134	100	187	83	123	124	138	99	132	142	166	151
CH44	C1.2	002_300ug CBD	37	20	12	0	4	12	0	9	0	12	2	46	52	2	0	20	14	6	27	14	22	26	26	46	29	50	52	44	40	39	34	26	61	10	22	18	12	34	14	10	27	30	36	55	39	47	55
CH45	C1.3	002_300ug CBD	42	50	18	17	7	61	51	13	11	29	27	8	2	0	10	16	31	22	44	29	17	28	28	37	42	63	32	66	26	27	31	39	27	6	24	4	1	2	10	14	12	16	28	36	53	77	106
CH46	C1.4	002_300ug CBD	30	41	51	7	19	60	43	9	23	20	35	17	0	11	2	5	27	24	18	45	33	32	48	72	58	63	83	76	72	48	65	26	37	31	21	24	9	22	21	24	44	27	48	74	106	154	151
CH47	C1.5	002_300ug CBD	78	107	118	102	93	60	19	31	60	57	32	25	46	100	63	33	88	156	88	94	105	116	84	108	167	88	84	118	104	152	86	55	67	84	111	117	82	37	112	89	80	83	94	129	150	169	195
CH48	A1.6	004_750ug CBD	79	43	49	58	30	19	18	1	6	51	117	54	14	7	9	11	9	7	8	5	4	23	3	4	4	10	4	8	21	21	33	22	49	28	24	35	75	13	69	28	77	20	23	26	58	70	9
CH49	A1.7	004_750ug CBD	48	9	5	0	15	13	4	0	22	11	2	2	3	4	0	4	0	0	2	3	0	4	0	0	0	0	12	3	4	8	16	18	17	17	11	20	22	30	10	3	4	6	2	1	1	0	0
CH50	A1.8	004_750ug CBD	74	31	13	23	15	10	50	21	33	18	9	18	9	27	6	3	2	1	2	0	0	0	0	1	0	36	9	5	20	53	35	19	29	38	55	94	51	53	20	35	42	11	5	0	0	10	0
CH51	A1.9	004_750ug CBD	69	62	43	54	33	58	101	89	96	66	73	69	61	55	47	26	48	6	78	35	0	1	5	16	9	24	70	22	65	80	89	93	124	138	115	108	106	92	75	85	62	27	28	24	67	23	13
CH52	A1.10	004_750ug CBD	109	147	215	219	223	205	213	225	218	204	195	180	192	201	216	190	196	227	221	202	199	227	240	244	199	192	179	211	180	196	208	177	177	192	209	173	191	183	185	173	194	222	202	157	151	135	159
CH54	B1.6	003_500ug CBD	118	92	73	35	14	4	13	21	2	7	4	57	63	35	55	90	75	156	120	14	123	134	62	78	97	86	89	67	72	80	38	29	101	58	64	89	89	66	62	107	135	35	47	76	66	85	41
CH55	B1.7	003_500ug CBD	33	61	14	8	8	11	20	2	13	10	5	6	1	20	2	17	5	24	11	5	17	12	39	31	34	68	39	47	83	59	41	76	78	50	66	68	64	13	7	42	60	20	20	34	68	93	41
CH56	B1.8	003_500ug CBD	37	9	19	15	57	16	3	58	53	51	14	95	75	31	29	21	5	21	8	23	24	36	47	68	74	88	95	103	91	94	81	113	68	83	60	75	67	93	24	33	80	44	39	45	79	91	128
CH57	B1.9	003_500ug CBD	33	89	162	77	65	37	99	142	56	99	89	97	105	61	24	56	57	58	57	85	80	133	141	126	131	136	118	165	163	109	133	125	145	135	136	94	163	151	129	80	108	133	135	101	110	139	184
CH59	C1.6	002_300ug CBD	137	26	8	3	0	0	3	9	0	0	0	6	3	5	21	13	12	18	12	35	54	86	105	140	134	137	145	129	175	151	167	136	100	121	97	151	107	146	175	126	89	85	131	162	132	168	175
CH60	C1.7	002_300ug CBD	92	70	30	3	1	8	34	34	2	0	2	24	7	12	13	20	27	21	22	57	134	58	67	118	135	92	115	152	160	95	80	173	114	78	11	8	31	26	20	83	33	36	52	58	79	162	145
CH61	C1.8	002_300ug CBD	66	22	12	16	3	0	0	11	11	2	0	26	3	1	2	2	14	5	18	39	21	52	98	52	40	55	44	69	82	73	86	27	17	19	16	12	31	1	8	28	26	26	15	32	66	57	119
CH62	C1.9	002_300ug CBD	21	29	37	17	50	45	14	19	2	6	32	2	5	4	10	2	23	29	51	38	31	38	88	82	90	110	89	102	126	105	77	46	69	74	58	66	18	17	12	15	33	38	59	46	135	156	167
CH63	C1.10	002_300ug CBD	162	94	141	116	91	69	81	143	154	112	104	172	120	128	84	36	46	69	107	80	113	79	131	130	118	111	141	133	144	164	140	158	191	130	89	56	72	106	84	81	161	92	140	148	177	215	224
CH64	A1.11	004_750ug CBD	127	78	65	43	24	86	120	121	155	29	4	11	38	161	115	43	7	53	4	41	47	160	143	28	57	71	10	3	21	9	42	39	147	123	98	127	117	109	170	170	193	184	175	179	191	204	204
CH65	A1.12	004_750ug CBD	88	46	21	18	44	38	48	16	21	35	25	31	34	55	39	118	124	96	62	41	53	34	41	48	38	13	15	9	16	21	68	25	31	41	21	43	28	30	50	46	14	5	22	27	10	8	2
CH66	A1.13	004_750ug CBD	61	68	11	12	9	7	21	20	33	18	38	11	25	8	7	3	8	0	3	14	1	1	4	1	11	77	49	37	31	63	58	62	78	78	61	50	32	26	23	24	25	26	16	5	12	9	18
CH67	A1.14	004_750ug CBD	58	27	100	95	115	111	46	76	99	83	110	128	141	104	91	107	122	79	122	68	56	83	57	16	36	15	40	53	119	129	166	157	168	144	170	144	106	142	111	93	118	102	90	79	89	55	51
CH70	B1.10	003_500ug CBD	135	57	107	83	98	128	75	163	87	45	112	48	99	176	212	198	226	197	191	158	54	29	42	44	115	112	144	138	135	147	193	197	172	184	175	176	160	171	148	213	163	197	204	187	178	198	190
CH71	B1.11	003_500ug CBD	22	20	12	5	23	15	7	10	21	20	17	7	4	8	18	10	24	25	49	13	13	39	39	29	60	104	73	141	146	102	152	145	80	98	118	117	98	81	59	136	69	70	110	147	121	76	106
CH72	B1.12	003_500ug CBD	56	37	78	13	18	7	8	6	51	17	23	12	22	31	32	55	57	37	55	78	98	108	96	92	104	106	121	118	106	142	121	130	143	143	131	143	137	103	123	105	90	139	147	143	129	149	126
CH73	B1.13	003_500ug CBD	100	151	107	131	133	88	147	172	195	215	193	144	186	171	195	223	183	163	142	170	173	163	173	180	157	156	180	168	150	143	194	160	135	157	149	151	161	131	152	151	147	199	196	190	171	178	167
CH76	C1.11	002_300ug CBD	46	118	53	25	40	21	17	1	5	0	0	10	0	6	0	6	9	7	12	35	32	39	122	76	63	121	134	121	73	87	146	151	163	127	146	186	153	177	164	195	147	179	167	155	180	154	161
CH77	C1.12	002_300ug CBD	77	71	10	21	12	3	9	5	8	12	4	4	1	11	0	9	6	8	20	32	36	56	39	86	100	84	88	61	88	97	150	105	137	167	204	132	117	83	60	96	40	74	99	125	173	105	118
CH78	C1.13	002_300ug CBD	44	55	37	61	42	14	21	32	40	55	26	176	40	32	48	38	51	43	115	121	136	117	133	135	129	155	138	104	131	96	132	136	110	74	82	102	105	109	76	90	159	119	119	144	158	175	176
CH79	C1.14	002_300ug CBD	55	95	95	160	174	174	142	145	197	187	221	209	220	237	232	231	247	225	207	226	218	194	219	201	172	179	160	180	199	204	165	191	220	204	172	217	225	171	170	190	183	176	173	182	191	207	192
CH81	A1.15	004_750ug CBD	63	55	17	47	38	75	64	83	105	51	78	49	51	149	149	146	72	59	61	135	156	171	175	126	133	82	116	121	139	157	153	155	154	142	149	148	136	155	198	180	184	178	169	166	175	192	187
CH82	A1.16	004_750ug CBD	134	182	127	107	107	127	130	183	89	130	158	205	142	173	188	206	172	203	179	223	220	238	246	217	210	213	210	205	195	195	187	202	185	184	176	189	177	182	169	216	170	132	145	150	166	162	139
CH87	B1.14	003_500ug CBD	37	71	42	67	12	8	18	2	14	13	23	64	67	89	92	109	139	57	35	71	121	107	106	117	103	119	108	114	135	136	115	137	166	126	128	140	148	185	180	183	157	157	177	162	183	174	157
CH88	B1.15	003_500ug CBD	120	110	141	45	67	84	37	94	116	52	84	174	144	185	150	196	196	187	155	171	194	195	170	159	184	202	181	140	127	139	161	161	151	171	157	154	133	176	205	178	149	191	188	180	176	182	151
CH93	C1.15	002_300ug CBD	43	52	92	56	119	77	14	22	29	46	52	57	6	18	16	23	20	31	59	60	115	153	150	141	137	149	122	127	125	168	167	170	120	145	177	184	193	203	195	172	166	196	198	169	172	160	172
CH94	C1.16	002_300ug CBD	66	139	76	40	23	17	63	53	95	120	86	146	130	119	96	56	81	116	136	191	164	161	177	179	197	149	159	159	158	163	183	151	123	171	185	179	200	188	198	204	185	205	204	186	179	189	186
CH113	A2.0	000_0.1%Tw80	58	23	95	8	29	9	8	0	7	6	19	4	9	41	42	94	77	83	121	59	72	141	198	148	113	85	63	79	74	65	127	140	176	131	161	198	133	215	154	214	193	201	213	183	210	208	199
CH114	A2.1	000_0.1%Tw80	76	33	67	56	51	23	1	1	2	1	8	6	23	22	30	48	64	93	82	82	158	202	163	145	87	100	141	112	148	62	23	62	51	63	62	105	129	179	222	205	205	199	199	214	216	213	182
CH115	A2.2	000_0.1%Tw80	34	79	120	45	10	11	11	1	11	19	29	35	28	34	69	57	68	94	127	117	101	121	119	123	122	182	131	60	87	164	55	101	146	80	85	140	148	136	194	190	197	186	206	214	205	222	182
CH118	B2.0	004_750ug CBD	64	47	19	7	27	20	28	42	40	36	83	64	85	78	16	0	13	4	9	0	6	0	21	6	0	10	6	10	22	30	56	58	61	33	92	84	39	53	44	104	114	85	33	47	103	59	42
CH119	B2.1	004_750ug CBD	29	11	2	30	25	11	16	39	21	10	19	29	15	13	7	4	2	6	2	5	8	29	35	85	94	31	7	9	15	32	31	33	60	51	67	51	33	42	46	16	40	27	27	26	26	26	20
CH120	B2.2	004_750ug CBD	68	41	18	11	20	49	16	44	47	11	19	48	54	49	15	19	95	25	5	25	0	10	15	13	1	13	28	18	8	30	32	33	50	64	74	48	95	76	149	57	44	38	71	84	56	8	24
CH121	B2.3	004_750ug CBD	150	80	82	68	102	141	104	117	156	129	156	102	125	132	40	58	70	40	87	88	36	56	116	105	94	64	74	32	60	71	71	128	114	127	144	187	90	127	166	179	130	112	108	129	66	154	167
CH124	C2.0	003_500ug CBD	37	66	52	5	8	49	5	3	0	7	11	21	0	3	14	123	77	60	31	74	17	12	37	40	56	44	151	152	110	168	133	153	153	150	153	124	112	126	164	97	80	130	103	84	86	166	126
CH125	C2.1	003_500ug CBD	20	29	31	15	50	43	22	5	8	13	16	0	3	2	0	0	0	6	0	2	5	8	9	11	22	37	59	55	98	54	81	72	90	58	93	148	153	108	135	93	55	69	77	46	57	66	116
CH126	C2.2	003_500ug CBD	63	141	75	62	78	76	84	69	29	39	33	12	22	3	4	0	33	42	11	5	18	4	11	16	45	36	41	42	72	53	107	125	98	68	64	87	29	93	49	77	26	90	29	33	57	91	94
CH128	A2.3	000_0.1%Tw80	62	50	85	211	164	124	85	15	4	0	6	15	29	26	43	23	51	44	84	150	60	52	59	28	34	85	36	49	30	22	7	22	16	19	65	98	83	96	153	171	168	187	164	156	177	198	195
CH129	A2.4	000_0.1%Tw80	47	19	13	1	10	6	5	7	2	0	6	16	22	43	28	58	43	43	85	64	56	52	35	31	32	17	35	14	8	3	4	9	13	20	42	66	78	114	140	180	142	174	180	159	171	175	188
CH130	A2.5	000_0.1%Tw80	77	23	3	31	2	9	3	0	4	0	21	12	31	31	66	58	66	63	60	58	67	84	75	72	39	30	19	9	3	4	12	9	23	16	50	72	95	125	135	185	154	180	171	171	204	194	172
CH131	A2.6	000_0.1%Tw80	56	20	43	39	14	11	12	5	20	5	36	12	57	99	83	119	107	89	111	116	100	113	103	92	86	86	84	106	38	21	16	15	54	36	72	118	117	133	188	204	201	206	233	167	200	214	192
CH132	A2.7	000_0.1%Tw80	82	55	135	142	151	180	212	220	165	136	164	188	177	155	151	163	150	160	152	132	163	166	181	127	76	132	81	89	67	96	196	186	168	162	170	163	178	168	166	143	150	144	142	161	160	158	171
CH134	B2.4	004_750ug CBD	49	18	1	2	7	17	30	7	11	9	9	10	4	3	1	3	12	4	3	3	4	1	2	5	1	4	7	8	19	33	54	81	44	47	44	49	68	88	104	78	63	74	100	33	12	54	19
CH135	B2.5	004_750ug CBD	83	26	3	0	8	2	10	3	6	38	33	16	28	38	3	5	14	20	15	3	0	26	0	5	4	5	0	23	15	32	33	32	49	48	50	56	47	43	38	57	94	149	66	103	133	60	65
CH136	B2.6	004_750ug CBD	68	25	5	14	0	52	27	20	106	31	38	11	10	6	6	17	23	20	52	70	79	14	18	0	0	10	4	15	32	56	43	84	125	120	146	84	125	136	67	72	45	48	79	138	100	83	110
CH137	B2.7	004_750ug CBD	66	94	86	59	55	75	88	73	93	49	31	42	27	14	105	140	102	26	21	41	37	33	39	22	27	26	36	49	53	75	80	76	120	112	85	90	127	100	105	77	75	84	59	65	35	91	47
CH139	C2.3	003_500ug CBD	153	122	43	81	133	53	16	4	2	7	0	0	4	0	2	17	0	3	15	0	4	10	13	77	60	63	64	74	66	58	60	91	72	112	110	114	63	137	139	88	54	98	80	127	101	104	109
CH140	C2.4	003_500ug CBD	26	28	6	0	3	14	9	13	5	6	5	22	4	20	2	0	0	0	3	17	16	25	17	38	53	32	29	50	62	85	71	130	76	79	43	22	50	46	104	73	82	80	72	69	92	134	116
CH141	C2.5	003_500ug CBD	18	8	13	19	4	0	10	1	11	22	0	2	9	11	14	5	16	0	3	8	36	30	93	45	56	92	63	49	43	93	83	124	120	55	95	160	143	137	124	152	168	217	165	205	173	174	148
CH142	C2.6	003_500ug CBD	28	107	111	22	63	113	53	101	38	56	30	13	18	14	11	26	44	6	5	77	55	35	42	45	41	81	58	96	102	113	190	117	95	128	169	100	108	93	94	110	104	27	36	59	131	187	141
CH143	C2.7	003_500ug CBD	36	37	54	65	75	50	67	73	60	56	60	60	56	42	38	47	34	47	72	57	56	55	58	89	69	118	122	112	125	106	107	117	121	129	144	99	95	83	122	64	58	102	101	89	68	91	135
CH144	A2.8	000_0.1%Tw80	60	86	37	8	9	4	2	4	4	8	12	15	32	41	64	63	48	62	70	68	49	67	144	105	91	74	40	54	25	8	25	23	17	30	49	66	89	92	151	114	139	153	150	141	145	175	140
CH145	A2.9	000_0.1%Tw80	60	33	18	17	13	8	0	5	14	9	7	14	14	37	42	55	61	56	61	54	56	54	64	43	27	23	13	42	14	5	11	17	27	92	61	87	45	70	88	124	98	112	142	140	127	150	157
CH146	A2.10	000_0.1%Tw80	47	26	18	17	4	19	1	1	8	4	11	3	42	45	54	64	118	96	93	73	60	59	83	43	26	44	53	8	15	0	6	15	16	17	30	73	61	100	151	147	170	160	151	213	198	154	136
CH147	A2.11	000_0.1%Tw80	45	21	78	71	51	69	28	6	33	21	30	60	76	143	132	112	154	154	160	120	119	99	106	79	132	124	102	112	23	22	13	26	46	59	75	89	111	162	181	185	223	190	188	155	177	189	217
CH148	A2.12	000_0.1%Tw80	195	212	196	202	233	206	179	185	230	208	209	176	195	195	215	193	180	181	178	173	137	114	151	130	136	160	190	175	186	186	167	169	175	169	174	186	186	202	186	189	196	176	192	195	184	196	198
CH150	B2.8	004_750ug CBD	117	32	29	9	15	4	17	3	11	33	20	76	57	134	75	7	32	109	22	8	7	4	2	8	2	13	8	30	201	93	73	55	121	123	74	90	139	51	81	115	32	43	26	38	36	10	57
CH151	B2.9	004_750ug CBD	72	13	6	2	34	63	17	10	9	9	1	28	28	16	4	12	9	14	3	3	15	0	6	2	16	6	8	10	21	42	41	75	69	57	76	108	53	55	47	79	91	51	92	73	108	46	70
CH152	B2.10	004_750ug CBD	63	19	7	18	14	20	21	35	28	31	32	5	18	28	1	23	37	9	10	0	32	18	5	18	6	6	15	28	43	38	75	92	84	108	139	106	102	138	100	74	142	61	33	91	78	102	44
CH153	B2.11	004_750ug CBD	99	120	79	62	58	85	64	73	127	116	99	84	42	34	39	68	168	108	115	106	66	74	28	34	52	63	78	100	119	105	137	143	132	142	165	96	141	112	117	106	119	87	89	101	40	90	129
CH155	C2.8	003_500ug CBD	157	155	15	35	10	30	46	31	13	0	0	1	17	11	34	7	2	2	8	2	24	31	48	88	93	149	150	127	153	115	115	140	143	143	124	173	99	111	99	102	168	122	174	172	125	118	148
CH156	C2.9	003_500ug CBD	40	8	14	16	5	6	60	111	54	0	3	1	10	4	6	1	6	3	8	6	12	13	55	47	64	42	64	80	59	48	124	86	68	44	71	109	93	82	122	70	74	32	109	177	169	118	142
CH157	C2.10	003_500ug CBD	46	19	13	4	2	10	5	1	14	4	2	8	9	8	15	86	12	14	17	8	15	25	26	40	63	109	69	108	83	115	84	90	87	101	69	157	106	116	80	32	72	29	44	58	50	47	70
CH158	C2.11	003_500ug CBD	42	46	24	9	20	40	10	51	71	18	61	18	52	55	34	74	45	35	37	33	91	77	114	125	73	82	102	94	136	143	103	130	110	123	108	111	81	140	107	55	67	61	68	137	141	132	90
CH159	C2.12	003_500ug CBD	61	67	61	101	90	119	89	139	131	65	124	136	162	140	134	156	159	159	117	124	92	122	140	134	167	138	151	178	152	160	178	156	131	130	161	103	97	93	142	65	73	91	120	104	120	121	131
CH160	A2.13	000_0.1%Tw80	162	205	96	18	1	4	2	5	0	2	6	21	79	46	52	79	112	139	121	171	149	176	172	125	131	180	151	144	112	137	170	173	191	189	186	193	172	169	157	155	162	140	167	143	157	158	175
CH161	A2.14	000_0.1%Tw80	56	18	23	14	10	8	5	4	9	5	17	12	34	39	61	62	64	68	82	112	57	116	96	83	76	68	41	49	43	68	38	50	36	47	109	93	103	122	140	97	123	136	142	146	193	157	141
CH162	A2.15	000_0.1%Tw80	58	46	30	18	13	13	0	0	2	3	13	41	54	65	87	96	100	137	154	119	146	123	105	133	60	40	49	59	9	14	58	42	38	41	63	119	124	167	166	123	128	149	149	155	146	138	177
CH163	A2.16	000_0.1%Tw80	129	146	161	108	155	165	229	208	212	198	179	197	193	198	187	168	192	166	162	168	176	207	196	176	159	131	111	185	149	156	120	100	142	161	161	174	160	173	203	168	190	198	195	172	173	173	173
CH166	B2.12	004_750ug CBD	98	38	9	24	43	27	71	30	48	48	24	52	29	5	5	7	35	116	100	5	23	3	0	1	9	18	29	41	45	80	108	138	140	132	121	176	129	143	154	168	162	185	163	152	148	173	143
CH167	B2.13	004_750ug CBD	71	8	10	6	111	62	37	16	11	10	60	11	11	47	0	4	17	31	10	7	4	18	12	18	16	44	92	28	23	54	71	93	106	131	95	116	142	147	147	124	89	162	59	85	67	48	130
CH168	B2.14	004_750ug CBD	55	29	41	50	62	27	34	17	37	21	16	38	61	16	15	29	49	110	82	131	122	99	89	202	109	93	40	72	115	141	141	150	172	188	136	170	110	108	122	148	89	129	160	104	39	34	102
CH169	B2.15	004_750ug CBD	110	127	131	104	106	155	177	141	150	199	194	203	197	205	221	188	196	243	231	238	230	230	217	233	231	240	224	223	202	208	186	201	209	193	170	185	188	165	163	154	165	169	194	185	195	173	210
CH172	C2.13	003_500ug CBD	160	42	57	68	59	68	31	0	1	4	48	44	14	37	31	122	17	44	28	59	72	75	65	97	111	181	90	113	116	145	165	173	168	121	141	126	121	186	165	155	205	197	105	133	183	159	197
CH173	C2.14	003_500ug CBD	78	40	8	45	11	10	24	7	0	13	84	41	71	13	18	0	0	6	2	15	13	62	49	49	105	85	91	98	102	101	131	154	165	75	83	96	136	127	119	92	50	177	155	88	109	106	125
CH174	C2.15	003_500ug CBD	67	71	86	24	52	14	148	110	20	10	49	55	18	77	89	37	39	72	44	168	174	119	165	173	133	150	142	164	167	163	177	160	152	166	157	55	69	71	74	78	84	96	77	128	117	124	123
CH175	C2.16	003_500ug CBD	97	61	64	67	76	122	120	112	118	164	125	140	176	184	182	192	158	173	166	189	165	167	158	158	195	187	155	142	137	117	124	119	116	113	90	80	113	176	131	159	167	165	150	164	128	140	148
CH208	A3.0	001_VCe	81	66	58	13	10	0	0	7	7	23	5	33	35	68	95	158	94	88	98	139	132	61	75	140	61	89	99	131	90	188	101	130	82	116	153	122	191	189	228	235	255	204	178	220	223	233	248
CH209	A3.1	001_VCe	92	69	101	20	2	3	2	0	1	3	8	26	94	71	38	49	63	53	120	101	44	80	72	145	115	52	87	36	11	17	17	6	41	133	106	108	145	175	187	188	175	198	191	202	201	178	186
CH210	A3.2	001_VCe	37	40	23	19	17	24	7	1	3	9	9	10	30	55	59	56	66	97	75	127	66	65	93	119	76	56	68	30	12	24	28	77	63	74	95	139	161	173	187	202	185	180	166	198	194	206	216
CH211	A3.3	001_VCe	18	36	34	13	10	19	52	96	8	19	19	29	78	60	85	76	75	97	133	115	90	69	106	133	96	72	94	109	129	130	132	102	138	171	136	111	142	163	174	169	157	164	165	195	159	169	190
CH214	B3.0	000_0.1%Tw80	85	31	28	0	3	7	117	91	16	4	3	10	13	17	57	54	68	102	64	109	96	82	85	84	89	139	112	81	22	21	21	82	77	192	150	146	110	142	127	147	130	144	132	132	142	148	141
CH215	B3.1	000_0.1%Tw80	65	22	7	2	3	8	4	0	1	0	0	3	3	19	21	41	55	38	57	65	114	85	187	164	96	89	62	48	138	69	120	49	42	82	106	87	91	132	132	129	136	139	201	152	156	165	150
CH216	B3.2	000_0.1%Tw80	35	7	34	4	2	3	6	0	0	3	7	6	12	27	23	57	42	46	100	91	96	108	88	99	68	90	127	74	26	51	151	173	71	114	119	66	123	144	129	148	143	134	181	170	226	205	176
CH217	B3.3	000_0.1%Tw80	118	115	129	133	138	63	16	91	16	17	55	48	75	63	114	87	88	105	114	96	128	92	101	159	119	122	108	111	127	153	73	111	116	133	139	144	117	133	170	169	162	168	179	173	150	152	167
CH220	C3.0	004_750ug CBD	41	20	12	5	21	4	9	7	13	50	14	12	7	46	29	39	11	23	5	7	10	8	7	19	12	27	21	25	18	26	96	61	48	48	64	75	90	92	89	54	87	62	41	21	33	78	65
CH221	C3.1	004_750ug CBD	27	2	8	5	3	2	15	11	11	0	3	24	8	0	2	0	0	3	3	2	5	0	0	2	4	4	15	10	9	9	16	31	29	22	32	32	65	52	39	30	61	45	24	36	25	63	25
CH222	C3.2	004_750ug CBD	92	29	14	15	1	10	17	14	7	17	5	18	1	2	4	7	24	16	3	7	0	11	0	1	0	0	0	4	11	19	11	28	31	39	46	63	60	42	61	56	86	89	31	58	68	56	67
CH223	C3.3	004_750ug CBD	113	88	114	136	116	102	135	58	106	97	93	62	63	32	13	12	80	21	46	14	2	10	20	35	17	7	7	6	17	46	30	55	51	108	89	95	130	139	61	128	165	119	98	150	62	123	45
CH224	A3.4	001_VCe	159	125	9	4	1	5	0	8	6	8	9	20	27	37	57	90	91	50	65	48	55	57	82	82	37	48	53	20	8	38	21	7	9	38	47	90	160	122	131	162	169	168	188	195	190	161	189
CH225	A3.5	001_VCe	34	18	10	1	2	3	1	1	9	5	15	26	41	45	87	84	72	63	65	57	88	46	94	57	57	24	5	40	1	5	5	14	9	36	35	68	126	147	107	164	171	155	166	152	178	188	165
CH226	A3.6	001_VCe	39	18	28	0	2	1	0	0	1	5	9	16	50	92	80	99	99	88	81	103	65	67	64	75	36	16	23	16	16	17	18	6	36	49	54	72	103	150	146	141	140	172	153	152	173	170	158
CH227	A3.7	001_VCe	67	50	20	11	6	9	4	14	8	13	35	52	80	79	96	107	126	120	139	135	113	107	94	123	102	53	82	80	14	15	21	50	34	93	97	123	171	174	176	179	184	197	202	191	181	193	194
CH228	A3.8	001_VCe	87	144	194	196	200	205	172	108	72	125	155	158	165	168	144	157	124	147	162	151	161	155	112	144	167	146	137	149	86	96	95	182	222	216	221	211	213	202	209	197	199	215	194	206	192	206	210
CH230	B3.4	000_0.1%Tw80	53	7	2	2	0	0	3	2	7	0	2	8	23	22	37	35	56	58	55	69	89	127	124	61	73	97	123	77	52	63	100	18	28	42	55	122	102	104	123	161	127	155	136	127	96	138	130
CH231	B3.5	000_0.1%Tw80	78	44	20	9	2	4	9	68	0	46	31	16	14	23	28	43	73	45	35	55	94	39	40	57	71	107	73	68	63	138	87	46	32	55	68	101	74	95	140	153	190	158	149	145	144	134	160
CH232	B3.6	000_0.1%Tw80	76	60	63	23	1	4	7	0	9	19	8	17	25	34	32	57	84	77	51	69	82	81	48	66	90	37	42	30	17	31	61	22	102	145	124	176	160	157	194	168	178	181	188	181	182	157	188
CH233	B3.7	000_0.1%Tw80	86	88	132	35	105	64	23	76	92	116	124	133	71	129	130	123	104	152	154	111	107	102	136	99	76	136	99	61	188	178	61	28	57	82	104	115	149	162	160	179	192	192	207	187	220	212	209
CH235	C3.4	004_750ug CBD	83	51	52	46	13	0	9	7	16	12	12	19	17	104	101	43	55	10	6	24	21	7	1	8	4	0	0	8	8	16	48	56	115	113	118	122	135	150	136	119	112	83	90	122	160	98	113
CH236	C3.5	004_750ug CBD	31	3	1	0	6	2	2	2	6	0	7	2	8	5	4	1	0	0	3	0	0	15	4	0	0	8	0	11	14	7	49	16	51	83	31	62	49	115	33	69	65	96	45	60	44	120	101
CH237	C3.6	004_750ug CBD	69	0	3	0	4	9	7	12	4	10	5	7	7	0	1	9	15	3	11	7	8	8	25	10	6	13	11	14	15	20	18	44	80	68	43	56	61	77	75	43	63	26	62	54	66	89	126
CH238	C3.7	004_750ug CBD	81	38	4	4	9	13	5	25	8	31	8	11	13	52	9	11	17	6	6	3	3	0	0	0	4	3	4	6	13	42	64	59	51	72	87	103	85	58	136	102	75	107	92	71	34	59	30
CH239	C3.8	004_750ug CBD	74	47	69	59	88	71	126	129	97	125	155	143	114	53	64	66	85	86	132	81	32	57	117	40	25	45	39	24	24	58	59	113	127	116	151	114	157	131	120	92	137	91	107	73	69	93	80
CH240	A3.9	001_VCe	161	22	17	31	2	5	1	1	8	9	16	26	58	72	95	81	164	181	120	122	131	109	135	186	116	115	53	153	30	21	20	79	77	92	157	170	150	163	190	190	175	201	187	168	172	184	189
CH241	A3.10	001_VCe	36	24	7	2	3	0	5	0	19	5	17	21	45	82	77	79	76	60	63	46	62	43	49	49	32	52	23	58	34	2	4	14	13	33	44	67	78	126	86	126	163	120	139	177	153	196	169
CH242	A3.11	001_VCe	54	35	10	4	9	14	1	4	7	14	29	63	75	88	87	124	118	99	114	129	109	81	78	42	34	13	12	13	13	2	5	7	30	40	95	74	112	168	158	156	160	179	168	170	194	166	169
CH243	A3.12	001_VCe	99	75	78	96	67	74	98	86	52	26	78	112	165	137	125	159	173	148	122	138	121	106	77	111	85	112	40	69	104	16	27	39	46	62	117	111	186	211	198	173	191	183	214	186	185	160	178
CH244	A3.13	001_VCe	158	214	191	202	195	209	192	198	197	191	212	206	225	202	208	200	196	197	186	164	199	183	197	187	193	186	158	83	164	119	129	176	202	199	187	183	177	192	180	174	171	194	199	189	193	173	178
CH246	B3.8	000_0.1%Tw80	32	7	30	3	3	18	7	1	0	0	14	6	12	14	35	39	30	60	90	52	61	60	76	97	99	115	34	20	12	19	93	53	44	38	77	70	70	166	93	97	145	124	155	158	133	160	151
CH247	B3.9	000_0.1%Tw80	63	25	14	40	33	0	4	4	11	7	24	2	12	22	27	34	58	42	45	59	82	88	45	62	50	32	47	43	62	18	9	4	25	42	28	51	93	126	142	166	107	171	138	136	152	169	147
CH248	B3.10	000_0.1%Tw80	65	55	83	106	93	56	25	9	5	3	28	43	70	82	107	106	90	106	100	119	92	106	119	87	101	78	105	42	92	50	45	43	57	66	68	111	109	129	142	154	173	198	197	179	159	163	178
CH249	B3.11	000_0.1%Tw80	80	93	125	53	29	74	29	108	102	183	74	121	139	151	149	175	193	191	170	136	159	103	166	167	138	127	58	63	134	39	38	89	112	152	128	109	146	158	195	212	216	185	169	233	203	180	180
CH251	C3.9	004_750ug CBD	28	35	7	2	4	5	9	17	14	2	3	4	0	6	7	1	6	17	14	8	9	2	0	3	6	2	1	5	9	22	38	68	98	75	74	75	62	105	108	56	65	110	111	111	107	95	27
CH252	C3.10	004_750ug CBD	60	107	53	10	9	25	7	18	6	9	16	31	62	43	35	82	72	58	38	31	39	26	21	19	12	11	16	14	13	40	43	51	92	91	48	94	84	61	99	123	73	48	63	103	114	152	91
CH253	C3.11	004_750ug CBD	56	34	9	9	2	9	11	7	35	29	8	11	18	18	13	18	51	55	1	22	2	2	20	0	38	5	16	24	20	25	48	43	96	92	87	87	133	118	130	97	60	77	82	42	44	86	34
CH254	C3.12	004_750ug CBD	70	62	22	19	33	15	20	107	47	42	28	70	53	31	15	124	112	180	167	136	75	33	33	65	32	28	31	18	24	58	38	64	88	108	147	84	98	96	116	127	119	78	65	42	147	86	89
CH255	C3.13	004_750ug CBD	116	82	164	164	192	130	118	109	160	137	148	137	131	108	115	141	127	155	161	137	156	137	138	138	41	66	58	78	67	89	84	96	120	171	136	139	159	139	138	136	91	118	86	121	125	101	81
CH257	A3.14	001_VCe	56	64	70	23	22	24	20	24	41	35	35	67	95	104	111	82	133	97	116	121	86	93	110	118	127	77	76	56	71	88	47	32	52	115	129	137	137	146	134	131	131	164	157	168	170	171	154
CH258	A3.15	001_VCe	49	72	108	71	92	36	43	10	13	12	33	53	119	93	138	105	140	158	162	128	132	129	155	114	60	85	85	61	63	12	40	34	90	104	127	133	148	184	173	188	177	153	179	156	189	170	184
CH259	A3.16	001_VCe	40	108	168	180	202	215	204	167	207	247	237	222	213	207	224	181	191	171	190	192	149	156	130	174	153	155	200	171	133	168	196	148	134	166	171	163	172	177	165	202	203	188	167	179	174	178	188
CH262	B3.12	000_0.1%Tw80	61	75	5	12	13	15	27	10	13	0	2	12	26	23	45	66	100	83	69	94	108	72	97	83	73	105	118	91	135	94	58	58	118	158	149	132	160	149	134	144	130	156	110	141	196	168	191
CH263	B3.13	000_0.1%Tw80	99	96	34	20	17	4	7	16	40	33	55	17	21	50	59	97	82	135	104	112	118	129	132	149	119	142	125	118	116	158	217	135	99	129	81	105	107	107	135	149	134	111	124	153	143	179	166
CH264	B3.14	000_0.1%Tw80	213	199	60	66	40	0	12	4	2	13	21	28	59	71	100	113	157	117	147	194	137	97	118	188	127	39	78	55	102	99	72	44	71	91	105	107	152	183	138	160	179	163	180	128	148	143	157
CH265	B3.15	000_0.1%Tw80	59	76	128	97	64	73	89	106	176	208	173	183	193	179	181	169	178	179	164	168	122	129	114	131	116	107	82	111	156	139	83	71	54	107	94	157	172	167	169	155	142	151	158	173	158	168	137
CH268	C3.14	004_750ug CBD	54	42	5	27	10	11	17	5	8	20	0	5	35	4	20	10	0	15	27	35	58	8	19	13	40	66	25	34	112	121	140	146	129	139	101	134	104	130	108	147	126	152	170	175	183	165	177
CH269	C3.15	004_750ug CBD	58	24	45	47	95	49	87	53	27	23	23	47	29	5	3	5	20	7	3	16	21	33	80	71	73	45	31	40	41	96	113	107	174	130	135	147	133	101	135	107	131	119	92	57	69	122	150
CH270	C3.16	004_750ug CBD	109	109	105	70	118	86	33	30	55	73	73	78	65	66	129	88	96	85	108	190	167	134	181	169	209	152	187	182	144	164	177	155	146	151	137	123	103	114	116	94	125	87	101	141	110	132	124
CH289	A4.0	002_300ug CBD	143	67	4	10	1	0	0	3	0	0	15	7	0	21	56	54	36	22	17	79	51	57	75	47	86	102	102	92	91	66	127	99	146	118	52	109	142	84	107	119	115	154	160	143	150	157	166
CH290	A4.1	002_300ug CBD	75	115	48	6	11	4	20	0	10	2	4	0	67	71	63	17	16	9	24	31	25	36	29	183	97	134	112	103	175	188	137	115	75	60	129	153	75	88	100	92	112	99	136	163	174	181	221
CH295	B4.0	001_VCe	39	24	41	2	1	3	1	1	0	0	10	12	26	41	66	65	79	65	58	66	84	136	81	86	111	135	119	128	108	111	84	81	137	173	169	181	181	189	158	181	158	152	167	198	179	165	194
CH296	B4.1	001_VCe	57	31	32	15	27	19	24	10	36	5	13	10	68	136	77	51	54	72	76	62	94	123	47	151	211	151	179	74	146	69	66	38	67	81	132	164	143	213	186	202	189	212	187	218	232	214	236
CH301	C4.0	000_0.1%Tw80	104	44	47	5	2	5	4	4	3	0	5	7	4	25	37	56	43	102	83	88	124	94	117	119	88	82	118	166	50	55	63	109	148	87	117	107	150	167	156	173	174	179	169	168	195	193	206
CH302	C4.1	000_0.1%Tw80	33	21	27	4	2	3	5	9	4	4	0	6	6	37	35	39	41	47	43	95	77	59	71	70	59	117	133	72	54	48	140	135	151	134	142	163	142	140	142	139	158	138	153	163	173	163	161
CH304	A4.2	002_300ug CBD	68	107	26	12	1	45	38	0	0	0	0	1	2	5	2	3	13	6	6	30	45	43	90	95	137	135	149	116	81	122	75	146	126	137	190	223	175	188	148	147	168	193	167	183	163	183	162
CH305	A4.3	002_300ug CBD	55	14	5	12	0	1	5	1	48	27	44	5	0	23	3	11	12	18	7	47	34	37	43	33	49	119	52	41	95	36	31	33	55	34	25	19	4	25	8	41	85	81	138	142	144	158	191
CH306	A4.4	002_300ug CBD	36	12	31	2	13	24	32	20	0	3	18	3	0	0	2	17	35	18	74	45	45	45	46	44	56	63	50	113	72	65	110	75	19	52	18	33	67	43	41	58	53	68	53	128	166	167	164
CH307	A4.5	002_300ug CBD	44	28	23	27	123	22	84	49	70	25	33	49	12	19	17	27	37	33	41	60	114	121	119	167	147	188	103	208	209	165	76	110	120	195	102	106	123	75	57	60	85	99	134	152	182	189	200
CH310	B4.2	001_VCe	79	151	202	156	165	133	127	9	20	20	50	46	50	61	48	104	160	98	138	144	124	141	151	111	104	183	193	203	192	212	170	198	116	127	129	138	179	147	146	165	158	156	173	155	176	177	182
CH311	B4.3	001_VCe	56	95	12	6	2	8	0	8	6	2	1	34	35	29	39	64	74	87	84	57	74	81	122	123	105	128	130	130	74	64	72	73	117	116	99	143	159	191	149	167	159	182	170	159	143	189	159
CH312	B4.4	001_VCe	24	36	7	4	5	2	4	9	2	11	7	5	28	43	56	76	61	133	59	90	78	61	30	61	95	121	144	43	32	62	81	77	112	116	104	115	161	148	154	157	161	203	209	173	176	199	172
CH313	B4.5	001_VCe	20	25	56	38	24	21	19	43	45	33	32	30	80	83	107	141	102	87	121	88	90	88	64	94	138	117	135	99	78	70	112	65	72	89	87	151	135	122	171	180	190	187	173	159	163	172	187
CH316	C4.2	000_0.1%Tw80	50	38	35	40	43	30	20	31	82	28	21	21	13	22	21	23	24	63	63	76	70	84	65	65	70	130	102	169	157	132	142	186	113	115	171	227	193	228	209	207	197	193	198	168	196	217	211
CH317	C4.3	000_0.1%Tw80	60	52	36	23	57	46	62	5	6	10	27	33	18	26	38	39	71	24	71	65	181	123	147	157	122	59	36	63	72	120	151	109	128	190	236	228	220	230	190	210	211	221	195	185	176	173	199
CH318	C4.4	000_0.1%Tw80	87	78	63	30	54	31	7	0	24	14	9	24	76	121	99	104	133	168	164	204	164	141	217	206	234	194	215	146	155	102	60	84	55	97	121	138	167	210	174	166	196	176	204	200	196	231	228
CH319	C4.5	000_0.1%Tw80	58	102	118	151	160	142	164	119	87	124	132	160	97	130	124	143	140	129	142	151	153	136	118	116	100	144	136	126	155	102	110	87	114	109	137	149	185	183	223	215	198	171	179	187	194	203	236
CH320	A4.6	002_300ug CBD	40	18	20	47	17	3	71	9	5	0	0	1	0	3	2	3	9	2	13	10	28	17	28	39	34	51	74	44	43	32	23	8	14	9	20	13	9	20	29	58	63	67	56	142	163	163	169
CH321	A4.7	002_300ug CBD	35	29	11	2	31	9	6	14	0	0	2	0	0	12	4	7	7	22	32	61	34	42	42	45	31	52	50	30	14	16	19	13	26	37	2	14	2	2	27	18	25	55	45	72	103	143	175
CH322	A4.8	002_300ug CBD	34	12	11	7	3	10	4	6	14	2	3	6	6	0	10	11	4	10	28	28	55	33	44	65	67	103	44	32	37	49	28	23	10	3	16	7	5	3	7	16	46	30	52	45	85	133	151
CH323	A4.9	002_300ug CBD	51	23	23	19	42	59	19	14	55	24	60	24	23	5	25	15	24	35	58	82	121	126	138	139	123	135	97	103	105	123	86	75	100	76	52	34	56	33	26	55	44	35	80	121	180	184	195
CH324	A4.10	002_300ug CBD	172	186	162	162	174	179	205	213	200	207	199	213	191	200	208	215	203	213	194	201	185	199	220	180	190	188	179	170	193	191	201	193	196	196	187	209	204	198	186	186	179	196	195	173	187	180	187
CH326	B4.6	001_VCe	98	10	4	1	1	0	8	1	3	1	7	10	43	28	65	51	46	56	101	111	66	61	83	75	76	43	53	29	13	36	35	17	13	25	36	65	104	122	146	164	162	121	148	140	174	150	139
CH327	B4.7	001_VCe	39	13	3	0	0	2	0	1	2	7	7	9	25	44	50	56	55	61	40	73	48	59	36	50	51	59	59	19	35	32	6	35	55	59	67	104	78	107	164	170	156	162	178	149	137	161	149
CH328	B4.8	001_VCe	35	10	4	1	5	0	1	2	6	3	16	12	39	62	45	73	64	127	121	84	84	90	71	45	40	35	96	40	46	84	45	9	10	17	47	63	72	147	153	167	171	162	199	180	177	160	168
CH329	B4.9	001_VCe	67	65	47	37	31	56	49	20	88	59	79	84	113	152	185	171	122	145	133	143	151	146	102	112	102	103	115	148	131	79	90	95	80	73	102	140	157	184	206	197	229	187	200	193	184	180	179
CH331	C4.6	000_0.1%Tw80	47	94	88	25	86	0	0	0	3	3	7	9	16	28	20	38	67	70	102	116	100	154	167	150	135	130	142	137	117	135	168	139	146	122	143	140	131	116	148	155	165	151	147	148	168	161	153
CH332	C4.7	000_0.1%Tw80	27	8	14	4	3	6	0	0	0	0	1	29	11	13	9	7	24	36	32	44	109	176	135	101	137	114	50	84	100	50	61	149	123	151	184	176	168	168	143	121	137	151	161	164	183	157	162
CH333	C4.8	000_0.1%Tw80	58	12	18	2	1	2	11	53	1	0	6	3	7	5	23	17	22	27	36	26	13	18	28	117	93	82	59	114	170	240	58	101	82	39	44	49	65	65	95	165	139	143	164	174	181	145	129
CH334	C4.9	000_0.1%Tw80	134	57	30	18	13	16	16	6	3	25	57	41	53	91	133	144	121	81	107	71	92	76	61	64	75	75	23	38	53	63	65	52	18	25	49	62	100	155	144	197	194	192	193	177	190	184	206
CH335	C4.10	000_0.1%Tw80	120	91	127	137	152	87	140	167	224	193	204	252	276	256	268	284	252	234	244	208	227	216	271	232	204	225	164	167	167	166	67	81	96	106	84	105	114	166	168	186	200	220	206	235	212	211	227
CH336	A4.11	002_300ug CBD	145	67	23	18	4	8	4	4	5	5	5	11	4	6	9	10	20	38	52	33	65	52	58	53	42	78	32	28	28	77	19	18	21	37	7	5	19	13	22	19	41	48	70	118	122	112	125
CH337	A4.12	002_300ug CBD	37	25	28	3	6	10	27	14	3	61	31	40	5	3	7	16	34	5	25	43	37	33	64	103	29	43	32	12	33	3	9	27	8	0	3	6	28	13	11	18	22	25	45	30	71	97	128
CH338	A4.13	002_300ug CBD	20	27	46	39	19	27	8	5	8	4	6	0	7	0	1	2	18	35	59	50	41	41	97	87	70	64	73	65	102	51	55	42	18	22	12	4	9	13	10	26	21	56	62	105	96	173	131
CH339	A4.14	002_300ug CBD	29	93	111	66	59	57	84	120	104	156	132	104	85	155	45	51	71	103	136	153	151	170	169	184	159	160	125	129	155	150	163	115	157	79	93	22	63	61	28	53	80	105	162	173	166	206	177
CH342	B4.10	001_VCe	89	51	44	23	14	6	12	11	22	10	17	24	28	28	52	60	49	55	52	76	99	84	62	108	110	67	43	85	31	70	52	33	23	52	78	95	106	136	125	152	164	128	155	150	156	114	129
CH343	B4.11	001_VCe	54	123	14	4	7	0	1	0	3	8	8	9	35	20	58	52	89	92	84	136	105	100	79	78	60	100	50	75	93	7	3	5	5	15	42	49	112	98	131	169	133	137	142	148	146	133	147
CH344	B4.12	001_VCe	31	32	34	10	47	36	3	3	18	12	16	37	60	83	102	103	133	161	120	135	132	151	95	113	31	144	34	29	65	20	2	29	7	21	37	72	83	125	178	138	182	182	151	197	170	158	151
CH345	B4.13	001_VCe	66	133	93	148	168	86	117	125	70	95	110	120	165	146	158	171	147	154	138	132	126	121	111	149	142	138	153	114	133	111	126	41	95	107	121	167	153	187	187	187	175	200	170	168	193	181	217
CH348	C4.11	000_0.1%Tw80	49	34	17	62	54	9	2	14	8	14	16	16	11	11	18	20	37	34	50	53	135	89	102	102	118	70	139	206	130	110	129	57	31	50	28	51	37	54	75	160	127	127	180	156	153	195	151
CH349	C4.12	000_0.1%Tw80	28	16	28	1	8	1	0	2	0	0	1	14	5	10	30	30	44	28	55	40	40	63	106	87	99	55	32	35	35	50	88	33	16	20	19	30	57	78	162	146	186	159	139	150	203	157	140
CH350	C4.13	000_0.1%Tw80	57	99	89	12	11	44	15	9	26	18	26	9	17	34	54	67	83	142	135	118	154	191	120	117	118	102	94	72	94	57	31	54	103	55	43	53	96	98	129	139	197	160	201	169	193	212	203
CH351	C4.14	000_0.1%Tw80	114	149	160	155	182	237	156	139	123	70	63	51	80	95	146	154	218	237	233	237	203	153	148	105	131	100	102	110	59	64	98	138	112	76	67	87	88	117	147	163	165	181	190	191	182	200	173
CH353	A4.15	002_300ug CBD	153	165	117	53	22	3	24	15	28	98	47	10	6	1	88	10	7	10	46	55	59	39	104	94	123	148	116	121	123	182	127	187	102	189	140	172	71	52	112	110	116	125	169	154	159	147	157
CH354	A4.16	002_300ug CBD	174	123	71	97	70	54	52	82	55	39	18	48	9	72	114	53	34	45	82	60	97	133	116	119	94	143	113	139	82	120	134	148	158	147	137	159	125	85	90	100	107	162	144	144	158	181	160
CH359	B4.14	001_VCe	103	79	89	10	16	28	18	10	11	15	18	64	67	85	106	118	148	136	108	84	114	138	158	104	93	80	62	43	37	19	11	27	32	35	159	165	130	124	147	148	183	153	144	154	139	158	150
CH360	B4.15	001_VCe	160	180	183	148	192	144	139	96	79	80	76	90	135	128	150	133	117	160	158	128	87	138	127	179	134	211	178	148	145	153	170	127	104	165	165	172	158	168	167	163	148	153	197	160	163	158	186
CH365	C4.15	000_0.1%Tw80	102	135	178	93	88	55	66	71	92	71	46	39	44	44	61	95	75	116	106	125	131	112	85	114	90	145	67	67	89	53	85	85	86	40	63	61	69	102	101	138	136	136	151	149	169	134	146
CH366	C4.16	000_0.1%Tw80	105	172	170	147	47	50	56	132	111	116	68	57	91	172	120	129	167	98	96	111	97	106	148	99	90	100	79	100	75	140	88	146	129	84	83	109	72	88	96	141	143	172	187	164	161	170	155
[truncated: 38 more columns]

## Sheet: wDAT+ Extr. ex2
DATE:	2023-11-10 15:12:35
FILE:	C:\Software\wmicrotracker\p00013\20231108_2031
SUBPROJECT:	2023 118-10 wDAT+ d2-3 extract ex2 bR
<<<<<< Group Activity: Average Activity Counts per Data Interval>>>>>>
Group/Time[m]	30	60	90	120	150	180	210	240	270	300	330	360	390	420	450	480	510	540	570	600	630	660	690	720	750	780	810	840	870	900	930	960	990	1020	1050	1080	1110	1140	1170	1200	1230	1260	1290	1320	1350	1380	1410	1440	1470
0.1%Tw80	85	53	56	48	38	36	33	36	33	30	29	36	38	44	54	61	70	80	91	92	98	96	97	97	95	99	90	88	80	75	75	69	74	66	67	70	90	110	123	135	146	157	160	160	172	169	175	180	178
VCe bR	77	61	61	54	48	38	40	44	42	46	46	50	58	62	76	94	100	113	112	109	118	110	110	104	90	90	96	86	85	82	77	72	64	72	80	94	108	128	144	158	167	176	178	177	176	178	178	182	177
300 extract	72	54	64	52	52	45	41	39	44	47	44	31	32	34	41	48	54	68	78	81	92	91	94	102	95	94	86	84	82	86	86	71	70	65	64	68	62	70	76	91	100	113	128	138	152	165	164	172	179
500 extract	64	56	78	63	46	52	40	44	45	50	56	50	45	40	44	44	37	44	50	56	68	78	89	97	100	104	98	105	102	103	102	105	100	104	90	94	106	92	100	82	82	82	84	106	117	130	148	156	170
750 extract	74	71	60	63	54	52	57	60	56	52	58	44	50	45	44	49	49	49	51	42	41	47	49	57	60	66	73	85	85	90	95	92	94	93	90	90	92	85	79	82	85	72	68	69	69	75	89	93	107
Time	28.5	29	29.5	30	30.5	31	31.5	32	32.5	33	33.5	34	34.5	35	35.5	36	36.5	37	37.5	38	38.5	39	39.5	40	40.5	41	41.5	42	42.5	43	43.5	44	44.5	45	45.5	46	46.5	47	47.5	48	48.5	49	49.5	50	50.5	51	51.5	52	52.5
<<<<<< Group Activity: Standard Error >>>>>>
Group/Time[m]	30	60	90	120	150	180	210	240	270	300	330	360	390	420	450	480	510	540	570	600	630	660	690	720	750	780	810	840	870	900	930	960	990	1020	1050	1080	1110	1140	1170	1200	1230	1260	1290	1320	1350	1380	1410	1440	1470
000_0.1%Tw80	15	4	1.2	2.3	1.7	2.9	2.3	3.5	6.9	7.5	7.5	7.5	6.9	10.4	8.1	11.5	11.5	13.9	5.2	6.9	7.5	5.8	5.2	4.6	4.6	6.4	4.6	2.9	6.9	5.8	0.6	4	3.5	5.8	2.3	6.4	8.7	10.4	11.5	11.5	10.4	11	8.7	11.5	12.7	11	11.5	8.1	7.5
001_VCe	12.7	7.1	7.8	9.2	18.4	10.6	11.3	8.5	16.3	19.8	18.4	21.9	15.6	16.3	14.8	14.8	15.6	9.2	11.3	14.1	0.7	4.2	0	4.2	8.5	3.5	0.7	5.7	9.9	3.5	0	4.2	5.7	6.4	1.4	4.2	10.6	10.6	17.7	12.7	7.8	8.5	1.4	2.1	1.4	5.7	6.4	6.4	4.9
002_300 extract	14.1	12	9.2	7.8	5.7	7.1	7.1	9.2	7.8	9.2	7.8	4.9	4.9	0.7	0	0	11.3	12.7	10.6	7.1	9.2	5.7	8.5	4.2	0	7.8	7.8	4.2	0.7	2.1	3.5	2.8	0.7	4.9	5.7	5.7	7.1	2.1	5.7	5.7	14.8	17	12	17.7	12	7.1	8.5	9.9	4.2
003_500 extract	0.7	4.2	3.5	4.9	1.4	9.2	3.5	4.2	7.8	7.1	3.5	2.8	4.2	7.8	8.5	9.2	2.8	2.8	0	4.2	3.5	9.9	9.2	4.2	5.7	0.7	3.5	5.7	12.7	7.1	2.1	0	7.8	6.4	2.8	14.8	14.8	14.8	6.4	9.2	4.9	9.9	9.2	5.7	2.8	0.7	2.8	4.2	7.8
004_750 extract	12.7	2.3	1.7	2.3	5.2	4.6	0.6	8.1	5.8	9.8	1.7	2.3	2.9	1.7	1.7	6.4	5.2	5.2	6.4	4	3.5	4.6	5.2	7.5	6.9	6.9	5.8	2.9	5.2	6.4	11	8.7	8.1	9.8	6.4	5.8	13.9	13.9	11	15.6	19.6	13.9	11	10.4	8.7	8.7	15	12.7	12.1
<<<<<< Group Activity: Number of wells/group >>>>>>
Group/Time[m]	30	60	90	120	150	180	210	240	270	300	330	360	390	420	450	480	510	540	570	600	630	660	690	720	750	780	810	840	870	900	930	960	990	1020	1050	1080	1110	1140	1170	1200	1230	1260	1290	1320	1350	1380	1410	1440	1470
000_0.1%Tw80	3	3	3	3	3	3	3	3	3	3	3	3	3	3	3	3	3	3	3	3	3	3	3	3	3	3	3	3	3	3	3	3	3	3	3	3	3	3	3	3	3	3	3	3	3	3	3	3	3
001_VCe	2	2	2	2	2	2	2	2	2	2	2	2	2	2	2	2	2	2	2	2	2	2	2	2	2	2	2	2	2	2	2	2	2	2	2	2	2	2	2	2	2	2	2	2	2	2	2	2	2
002_300 extract	2	2	2	2	2	2	2	2	2	2	2	2	2	2	2	2	2	2	2	2	2	2	2	2	2	2	2	2	2	2	2	2	2	2	2	2	2	2	2	2	2	2	2	2	2	2	2	2	2
003_500 extract	2	2	2	2	2	2	2	2	2	2	2	2	2	2	2	2	2	2	2	2	2	2	2	2	2	2	2	2	2	2	2	2	2	2	2	2	2	2	2	2	2	2	2	2	2	2	2	2	2
004_750 extract	3	3	3	3	3	3	3	3	3	3	3	3	3	3	3	3	3	3	3	3	3	3	3	3	3	3	3	3	3	3	3	3	3	3	3	3	3	3	3	3	3	3	3	3	3	3	3	3	3
<<<<<< Number of Samples per Acquisition Interval [1unit=500values] >>>>>>
Time[m]	30	60	90	120	150	180	210	240	270	300	330	360	390	420	450	480	510	540	570	600	630	660	690	720	750	780	810	840	870	900	930	960	990	1020	1050	1080	1110	1140	1170	1200	1230	1260	1290	1320	1350	1380	1410	1440	1470
#Samples	30	30	30	30	30	30	30	30	30	30	30	30	30	30	30	30	30	30	30	30	30	30	30	30	30	30	30	30	30	30	30	30	30	30	30	30	30	30	30	30	30	30	30	30	30	30	30	30	30
<<<<<< Average Temperature [°C] >>>>>>
Time[m]	30	60	90	120	150	180	210	240	270	300	330	360	390	420	450	480	510	540	570	600	630	660	690	720	750	780	810	840	870	900	930	960	990	1020	1050	1080	1110	1140	1170	1200	1230	1260	1290	1320	1350	1380	1410	1440	1470
Temp[°C]	23.2	23.4	23.4	23.4	23.4	23.4	23.4	23.4	23.4	23.4	23.4	23.4	23.4	23.4	23.4	23.4	23.4	23.4	23.4	23.4	23.4	23.4	23.4	23.4	23.4	23.4	23.4	23.4	23.4	23.4	23.4	23.4	23.4	23.4	23.4	23.4	23.4	23.4	23.4	23.4	23.4	23.4	23.4	23.4	23.4	23.4	23.4	23.4	23.4
<<<<<< Well Activity >>>>>>
Well	Group/Time[m]	30	60	90	120	150	180	210	240	270	300	330	360	390	420	450	480	510	540	570	600	630	660	690	720	750	780	810	840	870	900	930	960	990	1020	1050	1080	1110	1140	1170	1200	1230	1260	1290	1320	1350	1380	1410	1440
A1	004_750 extract	64	67	62	62	47	44	57	49	49	45	60	47	46	45	42	45	40	45	38	36	34	40	49	50	55	61	73	80	83	80	78	76	77	73	78	78	67	64	61	52	53	45	47	50	54	61	61	76
B1	003_500 extract	65	60	74	58	45	42	37	39	37	43	52	48	41	32	35	35	34	42	50	60	71	88	98	93	95	103	101	99	89	96	100	105	92	98	87	80	92	78	93	91	87	92	94	111	120	131	150	160
C1	002_300 extract	58	42	54	45	46	38	34	30	36	38	36	26	27	35	41	48	42	56	68	74	83	85	86	98	95	87	79	88	81	84	82	74	70	70	70	74	69	72	70	85	86	96	116	121	140	158	156	162
A2	000_0.1%Tw80	108	55	59	53	37	40	35	37	43	43	43	47	50	58	65	72	81	92	97	96	106	103	97	97	104	101	85	82	73	68	74	61	68	63	72	74	93	114	131	145	151	164	170	172	180	177	180	185
B2	004_750 extract	99	75	62	67	64	59	58	76	68	71	59	46	55	42	48	61	58	59	56	50	46	56	58	72	73	79	82	90	94	102	116	106	103	100	98	97	114	111	98	104	120	91	74	86	83	91	113	118
C2	003_500 extract	64	51	81	68	48	61	44	48	53	57	59	53	49	48	52	54	40	47	50	51	64	68	80	101	106	104	94	111	114	110	104	105	108	111	92	109	121	107	106	72	77	72	75	100	114	130	145	152
A3	001_VCe	90	68	69	63	66	48	51	53	59	65	65	72	73	78	91	109	116	122	124	123	119	115	110	108	98	94	95	92	95	86	77	76	70	78	78	98	118	138	161	171	175	185	179	175	178	183	184	188
B3	000_0.1%Tw80	90	59	55	46	36	38	36	42	36	30	27	39	39	51	60	72	82	96	95	101	106	101	105	105	93	108	100	91	94	87	74	72	80	58	65	79	103	125	138	149	162	171	167	170	188	183	191	191
C3	004_750 extract	58	71	57	59	51	53	56	55	51	40	54	40	50	48	43	40	48	43	58	41	43	46	40	49	51	57	63	85	77	89	91	93	101	105	94	95	95	81	77	91	83	81	84	70	71	74	93	84
A4	002_300 extract	86	66	73	60	57	52	48	48	52	56	52	36	37	34	41	48	65	81	89	88	102	97	103	106	95	102	94	79	83	88	89	68	71	60	59	62	55	68	82	97	115	130	140	156	164	172	173	182
B4	001_VCe	64	54	53	45	29	27	28	36	26	26	28	28	42	45	62	80	85	104	101	95	117	106	110	100	81	87	96	80	75	79	77	67	58	65	81	90	97	117	126	146	159	168	176	179	175	172	171	175
C4	000_0.1%Tw80	56	46	55	46	41	31	28	30	20	18	18	21	26	24	38	38	47	53	80	78	83	85	88	89	89	87	86	91	74	71	76	74	74	78	65	58	73	90	100	112	126	135	142	137	147	147	153	165
<<<<<< Channel Activity >>>>>>
Channel	Well	Group/Time[m]	30	60	90	120	150	180	210	240	270	300	330	360	390	420	450	480	510	540	570	600	630	660	690	720	750	780	810	840	870	900	930	960	990	1020	1050	1080	1110	1140	1170	1200	1230	1260	1290	1320	1350	1380	1410
CH17	A1.0	004_750 extract	9	6	0	3	0	0	0	0	0	0	0	0	0	0	0	0	0	0	0	0	0	0	0	0	0	0	0	0	0	0	0	0	0	0	0	0	0	0	0	0	0	0	0	0	0	0	0
CH18	A1.1	004_750 extract	62	120	54	43	34	29	42	45	0	18	9	8	3	6	13	18	10	8	30	16	1	6	29	16	31	36	33	49	107	101	118	159	145	118	173	87	104	132	169	147	86	87	54	118	98	106	93
CH23	B1.0	003_500 extract	29	77	108	37	18	4	2	0	0	0	0	0	0	0	0	6	0	0	6	4	15	14	22	55	53	53	69	70	28	89	77	67	35	70	9	17	40	42	23	51	71	21	61	116	93	86	174
CH24	B1.1	003_500 extract	56	170	82	64	62	40	11	21	2	11	8	42	13	4	16	11	1	8	2	32	16	21	24	64	37	93	104	111	88	42	78	41	20	34	83	64	73	38	30	18	24	90	63	131	130	134	159
CH29	C1.0	002_300 extract	39	76	132	75	23	17	2	0	6	20	3	9	4	15	52	73	41	6	18	21	37	21	41	46	64	38	31	118	13	13	0	13	15	4	2	0	9	5	3	8	7	13	19	42	64	114	126
CH30	C1.1	002_300 extract	128	51	31	45	29	32	20	4	10	4	10	7	0	2	12	8	7	39	23	23	21	35	34	43	40	72	24	18	13	11	35	19	3	9	21	8	2	37	42	67	39	14	39	88	115	158	172
CH32	A1.2	004_750 extract	55	51	112	100	12	9	0	0	8	21	4	0	2	0	1	1	0	0	0	0	0	1	0	0	1	2	1	0	1	0	1	1	0	4	5	0	0	3	0	0	0	0	0	0	1	0	3
CH33	A1.3	004_750 extract	63	33	50	22	8	4	28	37	17	12	2	4	5	7	8	33	11	9	0	0	0	4	3	7	10	24	33	16	22	24	18	15	10	16	17	28	20	10	2	28	14	15	2	12	40	5	19
CH34	A1.4	004_750 extract	60	21	31	50	22	20	53	27	17	18	12	10	4	2	7	0	5	2	2	4	3	2	14	11	40	29	35	68	59	39	48	47	51	37	82	51	12	16	13	4	23	0	48	9	4	17	15
CH35	A1.5	004_750 extract	38	66	119	63	45	46	68	55	86	70	96	51	11	6	7	15	30	14	2	3	4	9	55	55	43	74	73	129	112	98	109	109	112	112	99	127	102	60	44	40	37	31	29	24	38	55	73
CH38	B1.2	003_500 extract	77	15	97	52	20	24	50	13	22	44	83	53	62	24	22	0	2	7	64	23	14	9	36	27	28	32	14	44	56	77	83	190	121	10	11	14	6	4	6	36	4	10	7	23	61	89	56
CH39	B1.3	003_500 extract	26	18	19	12	6	15	3	3	4	7	28	20	14	16	0	1	14	16	3	21	36	13	17	19	45	25	59	37	33	42	76	34	18	27	5	10	8	5	12	5	4	7	21	29	53	62	77
CH40	B1.4	003_500 extract	42	22	55	29	25	24	10	13	61	42	15	0	17	10	3	15	9	6	21	12	28	53	67	84	83	55	71	89	62	81	67	83	30	107	77	93	73	16	29	29	21	29	42	43	114	127	153
CH41	B1.5	003_500 extract	103	88	158	97	60	68	17	48	66	94	71	95	64	40	29	34	28	16	68	68	102	138	184	102	84	131	152	141	108	91	134	115	68	75	98	99	137	78	168	145	142	140	132	160	147	175	191
CH44	C1.2	002_300 extract	53	4	8	3	9	0	18	0	26	87	77	11	42	9	30	34	16	22	105	58	62	53	23	74	79	27	48	30	14	18	14	5	10	8	0	8	43	12	7	25	34	28	65	40	95	161	123
CH45	C1.3	002_300 extract	71	19	10	10	8	0	16	0	8	0	1	1	9	4	3	4	10	8	46	28	50	31	28	35	44	45	28	40	13	6	9	12	12	1	7	3	1	2	23	36	39	49	49	69	68	125	97
CH46	C1.4	002_300 extract	9	19	59	94	65	37	44	28	10	10	0	15	3	5	5	9	15	31	38	69	45	95	66	97	76	88	31	29	16	31	12	1	10	8	4	6	15	13	6	21	22	40	91	78	130	172	158
CH47	C1.5	002_300 extract	128	139	140	111	140	84	105	56	103	91	62	34	35	35	61	58	78	93	83	125	121	123	123	106	122	76	105	125	135	72	114	138	120	102	44	61	57	74	58	94	61	102	130	158	188	161	180
CH48	A1.6	004_750 extract	50	75	84	123	47	14	10	26	51	45	148	98	56	42	1	2	26	15	72	67	10	4	9	9	14	22	21	17	10	16	43	16	19	26	32	63	94	60	36	20	23	6	8	18	22	35	25
CH49	A1.7	004_750 extract	34	41	23	35	32	26	38	15	36	14	5	3	3	2	3	2	0	2	2	1	2	24	14	11	4	16	14	11	20	25	27	16	13	11	20	7	20	10	4	4	5	4	8	4	8	15	14
CH50	A1.8	004_750 extract	119	127	60	41	42	66	63	54	19	30	20	3	0	8	2	0	0	2	3	2	3	7	34	5	28	38	56	71	64	57	58	56	45	39	37	33	19	21	9	9	5	7	7	11	10	28	28
CH51	A1.9	004_750 extract	47	50	79	62	96	45	87	79	56	105	79	38	27	28	30	37	0	3	4	9	3	22	18	48	76	105	104	108	121	132	132	112	135	107	114	100	76	72	66	33	53	14	21	8	27	45	79
CH52	A1.10	004_750 extract	156	149	164	166	161	176	187	160	187	182	192	177	192	190	190	198	183	188	203	212	192	204	206	193	205	197	185	178	187	157	168	192	191	186	181	206	209	193	211	176	195	203	174	202	214	197	174
CH54	B1.6	003_500 extract	53	12	15	9	24	0	2	9	9	18	16	6	12	59	29	7	1	2	20	40	20	54	109	59	82	88	70	83	71	17	55	32	76	14	13	18	9	37	107	136	33	64	53	33	41	49	101
CH55	B1.7	003_500 extract	31	27	17	12	12	10	8	21	3	3	4	5	8	1	10	7	10	7	11	24	24	17	28	38	57	65	53	92	41	27	20	50	73	84	24	18	3	13	24	7	37	47	39	61	65	68	85
CH56	B1.8	003_500 extract	61	47	26	39	8	4	46	37	59	26	41	2	12	11	8	2	13	16	18	34	29	108	96	64	95	78	82	116	64	77	67	130	81	83	49	25	71	30	18	18	23	30	40	47	77	70	126
CH57	B1.9	003_500 extract	49	66	118	87	111	115	113	95	44	91	111	72	62	65	68	41	38	40	61	81	96	139	129	145	145	92	145	134	134	101	148	189	143	146	132	62	108	95	120	96	140	123	124	130	148	161	171
CH59	C1.6	002_300 extract	45	25	2	2	0	15	5	7	13	29	72	43	50	33	5	59	16	25	29	39	65	67	63	125	93	117	93	118	85	139	134	80	65	98	170	121	61	51	61	91	135	133	142	141	143	142	142
CH60	C1.7	002_300 extract	66	44	11	5	3	2	1	6	36	21	5	3	6	3	4	10	7	27	29	83	66	81	95	70	50	73	20	22	85	135	84	58	32	43	97	68	63	37	30	40	28	56	79	88	147	149	157
CH61	C1.8	002_300 extract	51	6	10	9	8	0	0	1	4	4	3	2	0	9	10	33	13	16	10	26	41	36	60	72	44	35	68	79	82	42	41	30	17	17	1	6	3	11	9	30	42	36	78	79	99	138	127
CH62	C1.9	002_300 extract	65	39	24	51	53	25	38	22	10	38	19	3	5	5	18	38	36	58	97	83	93	96	106	122	137	100	71	108	117	119	80	62	33	32	6	14	9	24	40	50	97	60	109	124	130	161	189
CH63	C1.10	002_300 extract	84	104	125	117	146	109	143	135	176	89	116	129	112	122	107	125	101	140	154	179	162	189	178	162	141	147	119	129	112	123	137	104	131	89	71	149	91	78	102	99	97	124	121	142	169	190	176
CH64	A1.11	004_750 extract	54	60	10	26	43	55	92	117	41	10	55	42	134	114	23	95	89	159	106	35	50	115	109	135	128	125	150	132	204	219	126	103	123	142	133	140	158	110	78	88	98	99	168	135	172	195	202
CH65	A1.12	004_750 extract	52	21	25	21	51	33	26	12	41	13	25	26	6	6	8	3	6	5	8	2	10	17	27	23	15	18	61	38	67	40	55	46	41	25	45	56	31	15	38	16	16	39	20	18	15	48	21
CH66	A1.13	004_750 extract	34	50	43	70	40	37	62	34	23	20	21	11	33	26	55	9	8	6	18	1	12	19	15	26	36	39	71	68	73	96	58	79	54	81	54	56	30	21	27	18	19	12	25	13	11	21	17
CH67	A1.14	004_750 extract	80	95	78	89	93	59	45	54	61	73	87	101	89	98	130	103	71	115	16	36	60	29	63	87	116	145	154	188	153	149	134	123	180	124	125	133	87	146	118	95	122	77	48	70	34	63	92
CH70	B1.10	003_500 extract	109	53	101	105	56	117	111	73	16	21	34	16	22	8	18	10	51	86	117	104	126	175	145	162	109	163	125	96	168	182	148	145	177	191	201	146	216	163	184	175	191	171	184	207	187	212	213
CH71	B1.11	003_500 extract	76	32	8	6	14	2	8	14	6	27	20	24	0	6	0	10	7	8	4	17	20	17	50	50	62	82	58	58	54	109	49	49	59	83	42	66	70	75	50	73	61	72	66	121	125	131	167
CH72	B1.12	003_500 extract	24	26	31	60	10	23	4	11	23	10	26	29	70	9	30	13	63	43	39	45	101	134	125	124	124	155	125	65	101	122	123	91	96	103	114	114	103	112	122	114	89	92	108	88	129	150	172
CH73	B1.13	003_500 extract	138	125	163	132	184	153	160	196	168	200	207	172	183	190	197	191	220	207	182	233	221	213	207	189	180	206	165	164	185	175	199	200	166	172	176	201	176	163	179	190	206	208	196	196	185	192	191
CH76	C1.11	002_300 extract	69	68	106	58	28	26	7	10	0	39	4	10	5	29	56	83	34	37	42	36	84	65	84	140	137	59	152	135	183	165	123	130	102	149	78	163	135	197	130	91	161	201	198	188	187	196	196
CH77	C1.12	002_300 extract	49	23	47	3	27	3	5	9	13	24	0	5	0	1	4	6	9	49	34	40	33	44	58	52	109	98	77	69	42	55	94	42	86	69	31	54	72	131	110	119	106	142	192	205	190	161	178
CH78	C1.13	002_300 extract	37	39	85	22	85	104	18	28	38	20	39	17	18	73	46	12	39	100	122	115	134	112	135	149	114	161	100	138	130	129	100	152	117	131	128	112	97	114	107	129	115	145	187	158	190	212	167
CH79	C1.14	002_300 extract	81	44	99	114	133	154	136	171	157	141	181	133	151	197	238	218	184	206	205	193	206	185	171	176	181	181	171	162	162	178	157	162	165	144	205	163	173	139	163	186	156	166	163	148	167	159	152
CH81	A1.15	004_750 extract	90	65	23	49	20	51	82	59	117	79	110	58	65	59	75	57	43	50	31	31	46	15	20	22	15	16	36	76	45	21	40	47	14	21	48	11	8	10	23	3	0	0	1	1	5	3	6
CH82	A1.16	004_750 extract	83	106	91	97	48	70	83	67	69	49	147	175	150	164	161	192	195	181	149	188	182	207	218	210	180	158	210	212	161	184	184	169	171	197	163	223	169	215	202	197	211	170	193	199	222	202	173
CH87	B1.14	003_500 extract	86	151	54	17	24	17	21	13	15	4	60	67	43	21	6	26	39	37	14	51	69	110	139	132	191	138	152	132	97	148	113	110	189	168	170	158	185	206	198	184	153	170	173	189	165	197	183
CH88	B1.15	003_500 extract	87	39	132	164	87	54	30	59	88	89	109	170	81	49	125	190	54	167	162	174	213	193	190	170	139	188	178	145	127	154	167	157	123	209	182	181	187	175	212	178	193	205	195	195	195	195	180
CH93	C1.15	002_300 extract	11	2	16	20	18	28	13	28	7	23	9	7	11	33	25	23	67	57	60	64	106	103	90	100	106	104	124	109	108	90	133	106	134	155	202	189	210	185	188	205	188	195	180	174	165	149	177
CH94	C1.16	002_300 extract	3	8	6	20	1	2	1	2	2	3	13	8	7	18	29	19	43	39	56	83	82	104	100	98	85	57	83	74	60	109	119	148	140	129	118	130	131	119	118	159	142	135	122	133	131	140	143
CH113	A2.0	000_0.1%Tw80	88	33	19	34	1	0	0	0	0	0	6	3	3	15	17	27	61	79	34	32	37	79	66	41	90	76	43	13	48	35	62	27	15	18	53	72	90	116	147	148	221	209	181	232	235	219	206
CH114	A2.1	000_0.1%Tw80	114	10	13	11	4	15	13	3	5	8	7	5	6	18	31	33	38	45	49	47	56	47	46	91	97	93	70	38	43	19	21	8	10	19	46	38	64	120	152	156	153	193	208	230	233	199	215
CH115	A2.2	000_0.1%Tw80	130	68	24	27	21	12	1	5	20	2	9	13	15	15	49	71	86	89	75	77	127	82	66	69	55	71	65	65	51	66	31	28	53	90	73	83	108	133	138	173	160	162	147	227	225	208	174
CH118	B2.0	004_750 extract	78	77	89	87	87	78	34	63	59	83	50	15	5	31	3	94	36	10	58	3	8	17	8	40	27	42	49	61	64	92	132	85	95	92	93	120	106	104	76	125	156	134	73	135	123	84	104
CH119	B2.1	004_750 extract	119	101	9	16	37	13	34	55	7	10	35	18	43	16	1	5	1	29	14	14	4	15	12	10	33	20	24	59	38	63	96	95	78	46	83	113	140	69	138	130	145	86	90	120	118	139	112
CH120	B2.2	004_750 extract	38	59	122	49	70	51	66	59	47	41	42	15	52	15	13	8	4	31	21	20	6	8	16	31	45	57	66	68	141	80	69	57	88	55	61	52	113	86	122	122	128	58	93	55	93	105	228
CH121	B2.3	004_750 extract	121	145	134	111	108	145	162	210	129	90	75	171	120	117	188	98	167	192	133	146	126	192	161	171	204	156	112	78	75	99	105	176	152	65	127	173	103	165	148	130	179	140	111	130	87	126	136
CH124	C2.0	003_500 extract	48	40	164	160	49	64	39	12	11	54	56	6	4	2	9	11	1	2	0	18	16	18	26	18	56	71	69	112	104	73	61	74	65	161	64	104	74	54	29	39	91	40	38	45	54	87	169
CH125	C2.1	003_500 extract	43	8	14	55	31	62	40	18	3	25	20	2	4	0	3	7	14	4	2	5	24	32	28	43	65	45	61	33	41	82	72	85	45	28	52	66	44	61	104	44	40	34	34	48	69	106	129
CH126	C2.2	003_500 extract	32	107	142	156	84	71	61	107	33	70	57	17	3	14	8	2	10	16	40	14	38	101	54	83	59	103	74	63	70	77	55	52	105	110	32	111	50	57	137	36	46	28	39	83	128	170	159
CH128	A2.3	000_0.1%Tw80	60	41	7	24	14	4	8	1	10	14	40	43	16	25	45	34	23	54	44	44	63	59	71	82	61	85	51	48	24	22	32	31	17	6	26	33	35	90	108	149	146	129	144	161	157	162	179
CH129	A2.4	000_0.1%Tw80	67	5	3	6	7	3	7	2	0	0	3	11	7	16	32	16	42	54	34	49	45	31	35	16	53	40	29	27	6	1	2	2	0	6	8	17	21	33	46	78	92	107	135	162	152	128	181
CH130	A2.5	000_0.1%Tw80	110	1	15	15	17	23	6	2	2	4	17	8	11	12	29	39	50	93	59	63	64	52	65	46	62	25	13	17	15	18	9	1	4	10	9	19	17	53	80	119	141	137	172	161	160	151	160
CH131	A2.6	000_0.1%Tw80	84	52	58	51	32	13	18	16	17	18	15	24	27	44	59	80	67	91	99	97	83	110	118	128	121	53	26	90	61	43	21	76	62	15	26	37	79	129	129	159	181	194	232	187	208	191	205
CH132	A2.7	000_0.1%Tw80	150	130	175	193	159	226	230	216	243	224	215	226	240	227	214	214	214	206	198	177	178	184	162	165	169	178	179	190	182	204	212	202	204	219	215	213	203	188	190	193	166	176	176	184	160	160	164
CH134	B2.4	004_750 extract	111	38	21	76	45	37	38	26	139	151	48	73	26	4	11	50	32	16	99	9	2	8	30	23	49	23	25	27	50	67	78	51	49	36	95	74	37	31	34	19	7	6	16	9	11	18	28
CH135	B2.5	004_750 extract	125	28	19	26	26	6	29	13	18	30	12	6	6	48	26	22	8	15	3	8	40	13	15	25	23	41	58	64	75	62	106	65	83	89	76	73	69	114	80	44	84	26	13	56	25	35	43
CH136	B2.6	004_750 extract	95	14	32	32	31	22	68	42	34	12	7	38	24	14	2	12	5	38	4	24	17	40	44	92	43	68	78	96	97	135	153	67	90	138	129	94	142	52	59	34	81	19	39	58	45	60	79
CH137	B2.7	004_750 extract	132	139	71	132	60	62	39	81	20	60	101	63	89	44	20	65	95	92	29	41	74	84	83	69	103	110	106	120	160	124	124	78	151	168	109	88	160	147	111	48	76	81	90	147	79	59	149
CH139	C2.3	003_500 extract	80	53	86	18	1	18	21	61	6	7	1	0	17	0	3	18	0	0	0	0	16	40	51	82	118	68	70	99	134	128	174	142	168	136	56	62	105	51	67	136	78	9	60	133	95	134	123
[truncated: 130 more rows]
[truncated: 38 more columns]

[truncated: 11 more sheets: wDAT ex3 tL, wDAT ex3 tR, wDAT+ d1 ex3, wDAT+ CBD ex3, wDAT+ Extr. ex3, wDAT+ d1 ex4, wDAT+ CBD ex4, wDAT+ Extr. ex4, wDAT+ d1 ex5, wDAT+ CBD ex5, wDAT+ Extr. ex5]
