# Supplementary material for: Assessment of the effects of cannabidiol and a CBD-rich hemp extract in Caenorhabditis elegans
Source: Front Toxicol. 2024 Oct 1;6:1469341. doi: 10.3389/ftox.2024.1469341 (PMC11484448; doi:10.3389/ftox.2024.1469341)
Supplement: Supplementary file 5 [file DataSheet2.xlsx]

## Sheet: CBD ex1 tL
DATE:	2023-05-26 12:30:08
FILE:	C:\Software\WMicrotracker One\wmicrotracker_w8_v30api\wmicrotracker\wmicrotracker\p00025\20230523_1226
SUBPROJECT:	2023 0526 wDAT CBD ex1 tL
<<<<<< Group Activity: Average Activity Counts per Data Interval>>>>>>
Group/Time[m]	60	120	180	240	300	360	420	480	540	600	660	720	780	840	900	960	1020	1080	1140	1200	1260	1320	1380	1440	1500	1560	1620	1680	1740	1800	1860	1920	1980	2040	2100	2160	2220	2280	2340	2400	2460	2520	2580	2640	2700	2760	2820	2880	2940
Emulsion control tL	65	74	86	94	96	103	105	96	87	74	82	65	53	45	44	30	18	16	13	16	19	33	44	54	58	55	43	38	45	38	38	36	34	48	76	93	106	103	95	100	92	91	79	77	85	108	139	174	196
Tween Control	74	85	102	116	117	121	121	110	107	92	77	63	56	47	44	40	25	12	12	17	26	52	63	72	76	73	67	52	55	48	40	29	32	53	84	117	133	146	130	118	109	97	90	90	104	125	158	195	222
300ug CBD	47	40	57	61	65	66	65	64	58	56	52	45	41	44	44	48	39	38	28	28	28	38	45	60	67	68	61	58	73	66	54	60	37	32	51	78	96	110	106	94	87	89	92	89	76	79	79	112	153
400ug CBD	46	40	46	52	56	61	62	57	56	53	46	36	43	49	52	57	52	41	37	39	36	41	49	52	65	67	69	64	76	78	64	56	52	53	46	56	80	103	114	121	117	107	89	100	91	78	78	91	111
<<<<<< Group Activity: Standard Error >>>>>>
Group/Time[m]	60	120	180	240	300	360	420	480	540	600	660	720	780	840	900	960	1020	1080	1140	1200	1260	1320	1380	1440	1500	1560	1620	1680	1740	1800	1860	1920	1980	2040	2100	2160	2220	2280	2340	2400	2460	2520	2580	2640	2700	2760	2820	2880	2940
000_Emulsion control tL	2.3	4	1.2	1.7	4	2.3	2.3	2.9	1.2	1.2	2.3	1.7	3.5	8.7	2.9	1.7	0.6	3.5	8.1	6.9	4.6	9.2	5.8	5.8	3.5	1.7	3.5	1.2	8.7	5.2	8.1	9.2	4.6	15.6	21.4	16.2	2.9	5.8	15.6	5.8	2.3	5.2	2.9	10.4	29.4	43.3	48.5	32.3	13.9
001_Tween Control	7.5	2.9	5.8	3.5	1.2	4	11	7.5	6.4	8.7	9.2	6.9	8.1	8.1	5.8	8.1	4.6	1.2	1.7	3.5	3.5	4	6.9	5.2	8.7	6.4	1.2	7.5	9.8	8.7	8.7	6.9	6.9	15	25.4	23.7	15	13.9	9.2	6.9	8.7	16.2	15	4.6	19.1	39.8	42.7	34.1	21.9
002_300ug CBD	4.6	2.9	9.2	5.2	7.5	1.7	4	4	1.7	2.3	3.5	2.3	1.2	3.5	4.6	6.9	11	4.6	2.9	4.6	6.4	6.9	2.9	2.3	7.5	6.4	3.5	2.3	6.9	2.9	2.9	6.4	1.7	6.9	16.2	17.9	13.3	6.4	6.4	5.2	2.9	16.2	7.5	5.8	1.7	6.4	20.8	23.7	22.5
003_400ug CBD	2.9	1.2	1.7	1.2	2.3	2.9	6.4	8.1	6.9	7.5	4.6	1.7	2.3	5.8	4	4.6	3.5	1.7	2.3	7.5	12.7	17.9	11.5	8.7	12.1	8.7	0.6	5.8	2.3	11.5	6.9	5.2	4.6	4.6	9.2	13.3	12.7	10.4	11	8.7	1.7	11	8.7	11	11	6.4	8.1	18.5	17.3
<<<<<< Group Activity: Number of wells/group >>>>>>
Group/Time[m]	60	120	180	240	300	360	420	480	540	600	660	720	780	840	900	960	1020	1080	1140	1200	1260	1320	1380	1440	1500	1560	1620	1680	1740	1800	1860	1920	1980	2040	2100	2160	2220	2280	2340	2400	2460	2520	2580	2640	2700	2760	2820	2880	2940
000_Emulsion control tL	3	3	3	3	3	3	3	3	3	3	3	3	3	3	3	3	3	3	3	3	3	3	3	3	3	3	3	3	3	3	3	3	3	3	3	3	3	3	3	3	3	3	3	3	3	3	3	3	3
001_Tween Control	3	3	3	3	3	3	3	3	3	3	3	3	3	3	3	3	3	3	3	3	3	3	3	3	3	3	3	3	3	3	3	3	3	3	3	3	3	3	3	3	3	3	3	3	3	3	3	3	3
002_300ug CBD	3	3	3	3	3	3	3	3	3	3	3	3	3	3	3	3	3	3	3	3	3	3	3	3	3	3	3	3	3	3	3	3	3	3	3	3	3	3	3	3	3	3	3	3	3	3	3	3	3
003_400ug CBD	3	3	3	3	3	3	3	3	3	3	3	3	3	3	3	3	3	3	3	3	3	3	3	3	3	3	3	3	3	3	3	3	3	3	3	3	3	3	3	3	3	3	3	3	3	3	3	3	3
<<<<<< Number of Samples per Acquisition Interval [1unit=500values] >>>>>>
Time[m]	60	120	180	240	300	360	420	480	540	600	660	720	780	840	900	960	1020	1080	1140	1200	1260	1320	1380	1440	1500	1560	1620	1680	1740	1800	1860	1920	1980	2040	2100	2160	2220	2280	2340	2400	2460	2520	2580	2640	2700	2760	2820	2880	2940
#Samples	60	60	60	60	60	60	60	60	60	60	60	60	60	60	60	60	60	60	60	60	60	60	60	60	60	60	60	60	60	60	60	60	60	60	60	60	60	60	60	60	60	60	60	60	60	60	60	60	60
<<<<<< Average Temperature [°C] >>>>>>
Time[m]	60	120	180	240	300	360	420	480	540	600	660	720	780	840	900	960	1020	1080	1140	1200	1260	1320	1380	1440	1500	1560	1620	1680	1740	1800	1860	1920	1980	2040	2100	2160	2220	2280	2340	2400	2460	2520	2580	2640	2700	2760	2820	2880	2940
Temp[°C]	22.6	22.8	22.8	22.8	22.8	22.8	22.8	22.8	22.8	22.8	22.8	22.8	22.8	22.8	22.8	22.8	22.8	22.8	22.8	22.8	22.8	22.8	22.8	22.8	22.8	22.8	22.8	22.8	22.8	22.8	22.8	22.8	22.8	22.8	22.8	22.8	22.8	22.8	22.8	22.8	22.8	22.8	22.8	22.8	22.8	22.8	22.8	22.8	22.8
<<<<<< Well Activity >>>>>>
Well	Group/Time[m]	60	120	180	240	300	360	420	480	540	600	660	720	780	840	900	960	1020	1080	1140	1200	1260	1320	1380	1440	1500	1560	1620	1680	1740	1800	1860	1920	1980	2040	2100	2160	2220	2280	2340	2400	2460	2520	2580	2640	2700	2760	2820	2880
A1	000_Emulsion control tL	61	81	88	94	101	101	108	95	88	76	84	62	48	37	49	27	17	22	29	28	26	36	47	52	56	58	40	40	42	30	26	23	34	68	107	106	100	93	68	88	88	82	74	90	144	187	215	216
B1	003_400ug CBD	47	41	43	54	56	64	58	52	48	43	41	40	43	60	51	65	57	41	34	44	53	75	71	69	88	84	70	68	76	99	78	64	58	48	61	78	98	123	130	134	119	125	106	121	110	91	93	127
C1	002_300ug CBD	52	39	41	51	62	63	58	58	56	52	47	43	39	37	40	34	24	29	25	26	18	25	40	57	54	60	56	55	62	64	56	57	34	22	36	49	73	103	108	95	89	84	87	85	73	81	60	86
A2	001_Tween Control	59	81	93	113	115	115	100	97	94	75	59	51	42	34	34	25	20	10	11	11	23	50	59	71	59	60	68	38	39	33	23	16	40	76	123	143	136	120	112	104	93	70	60	81	142	200	226	226
B2	000_Emulsion control tL	65	74	84	96	100	107	101	91	85	72	85	66	59	63	40	33	19	15	8	14	20	48	53	65	64	52	39	36	61	47	54	54	42	59	86	112	110	105	95	104	96	92	84	56	58	100	153	195
C2	003_400ug CBD	51	41	48	50	60	64	74	73	70	68	55	34	40	40	60	49	53	44	41	25	12	14	31	39	57	60	69	72	72	74	55	46	55	50	30	33	55	89	119	124	119	110	83	94	92	73	76	83
A3	002_300ug CBD	50	45	72	67	79	68	72	72	56	56	58	50	41	45	40	55	33	42	33	22	27	40	49	64	80	80	67	58	72	72	58	73	36	46	83	111	119	123	116	102	91	120	107	100	79	89	121	159
B3	001_Tween Control	81	83	112	122	117	129	126	112	116	96	88	74	70	61	54	45	34	13	16	22	32	60	76	82	89	77	65	64	73	62	50	40	37	58	93	138	157	167	141	128	123	126	108	91	85	110	170	232
C3	000_Emulsion control tL	68	67	87	91	88	100	106	101	89	75	77	67	51	36	42	31	19	11	3	5	11	16	33	46	53	54	50	38	31	36	35	30	27	17	35	60	107	112	121	107	92	100	80	84	53	38	48	110
A4	003_400ug CBD	41	37	47	51	53	55	54	47	51	47	41	34	47	46	46	56	46	38	37	49	44	35	45	49	49	57	68	53	79	60	59	58	43	62	48	58	86	97	93	104	114	87	77	84	72	70	65	64
B4	002_300ug CBD	38	36	59	65	54	66	66	62	61	60	51	42	43	49	53	54	61	42	25	37	39	48	47	59	66	64	60	62	86	62	49	51	40	28	33	75	95	104	94	84	81	64	82	81	76	67	56	92
C4	001_Tween Control	82	90	101	112	119	119	137	122	110	104	85	63	55	45	43	51	22	14	10	18	22	46	54	64	80	81	68	55	54	48	46	32	18	24	36	70	105	151	137	121	111	96	103	97	84	64	79	127
<<<<<< Channel Activity >>>>>>
Channel	Well	Group/Time[m]	60	120	180	240	300	360	420	480	540	600	660	720	780	840	900	960	1020	1080	1140	1200	1260	1320	1380	1440	1500	1560	1620	1680	1740	1800	1860	1920	1980	2040	2100	2160	2220	2280	2340	2400	2460	2520	2580	2640	2700	2760	2820
CH17	A1.0	000_Emulsion control tL	45	10	0	0	0	0	0	0	0	0	0	0	0	0	0	0	0	0	0	0	0	0	0	0	0	0	0	0	0	0	0	0	0	0	0	0	0	0	0	0	0	0	0	0	0	0	161
CH18	A1.1	000_Emulsion control tL	36	52	49	62	78	74	54	53	49	51	74	29	53	69	11	13	21	8	8	8	22	5	18	34	23	15	6	5	11	10	1	3	7	22	51	55	55	30	18	39	72	5	6	20	68	168	151
CH23	B1.0	003_400ug CBD	7	0	0	0	0	0	0	0	0	0	0	0	16	55	38	23	21	19	10	29	16	24	31	30	26	32	17	9	28	33	47	11	31	29	11	9	44	73	41	69	88	65	83	54	56	52	81
CH24	B1.1	003_400ug CBD	19	6	15	13	19	13	7	20	2	19	8	6	10	9	18	4	10	38	18	6	22	8	10	15	21	12	11	15	15	5	29	22	32	10	24	62	40	60	75	87	74	80	13	12	5	6	7
CH29	C1.0	002_300ug CBD	15	14	41	28	29	9	27	31	29	33	98	36	38	9	14	5	4	12	5	12	5	4	13	13	24	13	19	9	22	3	20	45	17	7	30	8	16	29	67	79	89	16	20	36	12	13	3
CH30	C1.1	002_300ug CBD	28	21	43	25	18	17	40	38	27	32	67	19	46	62	52	82	18	7	4	15	13	5	19	73	16	11	26	67	32	8	19	27	9	12	13	13	31	40	24	34	24	25	21	54	6	27	9
CH32	A1.2	000_Emulsion control tL	32	45	46	66	66	68	99	46	61	35	28	31	8	3	6	6	0	0	0	3	2	14	23	32	22	23	12	10	15	7	5	5	15	27	75	92	54	38	24	29	26	2	3	15	33	133	164
CH33	A1.3	000_Emulsion control tL	37	45	42	67	82	100	104	94	56	41	17	25	10	3	5	0	0	0	0	6	9	25	14	32	37	11	11	14	9	2	0	0	10	16	39	65	43	53	106	56	35	135	117	5	15	90	186
CH34	A1.4	000_Emulsion control tL	23	41	77	123	159	133	157	122	115	57	37	27	34	10	14	6	7	2	0	4	8	29	16	33	37	23	9	4	23	1	0	4	7	18	60	66	90	48	20	19	156	17	6	9	59	134	154
CH35	A1.5	000_Emulsion control tL	50	90	78	102	122	130	124	107	108	85	54	75	54	21	20	0	14	29	3	3	22	41	55	54	31	22	18	6	2	9	30	20	22	45	110	122	148	65	53	55	51	32	38	16	89	225	247
CH38	B1.2	003_400ug CBD	19	0	0	0	0	0	0	0	0	0	0	0	0	0	0	0	0	0	0	0	0	0	0	0	0	0	0	0	0	0	0	0	0	0	0	0	0	1	0	0	0	0	0	0	0	0	0
CH39	B1.3	003_400ug CBD	18	9	8	3	27	30	28	46	50	41	30	13	37	10	4	0	5	17	1	0	8	1	3	15	31	16	21	6	91	10	15	10	18	13	1	14	20	108	72	104	45	22	35	35	17	10	0
CH40	B1.4	003_400ug CBD	21	15	5	4	14	35	5	16	26	20	47	31	40	4	44	53	14	2	27	4	23	34	20	4	35	31	2	35	6	13	38	21	0	3	3	18	22	64	75	61	34	51	1	17	34	26	9
CH41	B1.5	003_400ug CBD	13	6	24	48	41	36	17	22	23	14	24	30	12	29	0	4	12	5	2	17	17	20	2	15	71	64	15	29	25	152	38	26	34	55	10	27	76	69	91	90	47	36	18	15	55	12	8
CH44	C1.2	002_300ug CBD	35	38	23	46	45	76	63	109	69	81	52	52	25	29	65	19	4	19	9	9	3	30	105	18	33	36	25	70	169	80	41	11	3	7	16	13	23	31	47	19	48	74	76	10	43	7	13
CH45	C1.3	002_300ug CBD	33	13	15	7	24	25	32	52	42	26	37	8	7	2	0	11	1	0	3	1	0	1	6	9	29	37	67	78	55	8	52	5	2	2	0	6	17	50	61	22	37	23	54	38	7	12	1
CH46	C1.4	002_300ug CBD	14	13	22	38	79	58	62	36	55	25	13	17	10	15	16	11	20	42	7	8	1	2	13	15	44	42	18	32	17	32	19	30	14	3	9	12	42	92	60	44	38	38	57	38	12	58	19
CH47	C1.5	002_300ug CBD	26	32	35	50	52	24	30	44	12	24	38	22	13	16	12	21	6	20	39	19	4	8	18	32	38	51	96	56	57	33	24	49	27	10	8	16	52	82	104	118	51	84	28	22	64	46	19
CH48	A1.6	000_Emulsion control tL	28	41	69	82	137	132	116	106	73	84	33	36	18	3	9	6	0	2	0	0	5	4	23	15	35	13	85	21	23	21	0	0	9	11	24	74	44	81	73	148	53	10	14	8	35	173	315
CH49	A1.7	000_Emulsion control tL	34	57	74	82	74	97	98	120	66	45	16	21	6	26	4	9	6	0	0	0	5	5	9	23	36	25	6	24	12	1	0	2	7	29	54	59	43	46	24	3	4	3	0	3	13	61	124
CH50	A1.8	000_Emulsion control tL	77	61	85	112	136	137	142	109	97	45	62	49	24	18	3	14	10	0	0	0	14	27	27	76	32	20	7	5	6	4	4	0	7	29	79	46	46	21	22	34	13	2	0	1	41	98	133
CH51	A1.9	000_Emulsion control tL	139	126	151	123	167	140	159	138	95	90	132	80	65	81	30	52	53	9	9	16	22	44	81	71	51	36	26	47	68	12	18	75	34	89	183	143	158	110	109	77	106	131	12	78	154	218	220
CH52	A1.10	000_Emulsion control tL	180	200	201	180	187	158	135	105	139	154	173	154	173	172	229	130	111	128	138	102	117	117	181	186	195	261	222	222	294	170	184	168	217	270	308	385	410	366	257	350	361	375	341	367	415	399	412
CH54	B1.6	003_400ug CBD	41	48	43	24	66	97	126	131	118	70	56	80	78	68	36	84	57	33	112	112	43	116	22	14	71	50	69	49	92	139	38	63	55	57	54	132	87	29	92	23	48	100	8	29	46	111	17
CH55	B1.7	003_400ug CBD	28	22	17	38	55	51	92	60	48	49	74	38	8	37	11	11	7	26	2	0	7	4	19	19	39	118	80	103	106	105	51	91	21	52	128	86	101	38	96	69	30	58	39	63	32	17	14
CH56	B1.8	003_400ug CBD	32	33	12	19	23	51	59	34	41	29	26	21	24	45	7	28	27	4	3	0	3	14	12	37	57	26	39	77	19	65	15	35	31	3	32	62	55	92	99	88	85	49	59	54	50	13	50
CH57	B1.9	003_400ug CBD	27	29	19	37	27	69	61	29	33	24	24	8	17	8	4	22	19	0	8	13	7	11	23	44	61	54	70	38	37	39	51	41	39	13	27	44	105	119	127	134	87	42	68	107	94	57	34
CH59	C1.6	002_300ug CBD	34	9	33	65	49	87	77	99	116	93	62	103	84	93	99	159	46	54	39	17	38	28	34	63	67	85	104	125	122	189	111	120	23	9	65	52	68	116	125	180	193	112	57	140	80	51	10
CH60	C1.7	002_300ug CBD	46	48	29	16	47	80	90	91	109	78	78	50	76	25	13	7	39	61	94	96	5	10	19	38	35	48	78	15	45	108	15	48	19	3	14	2	58	51	23	38	69	22	55	31	48	42	2
CH61	C1.8	002_300ug CBD	43	21	11	18	29	36	41	34	40	25	45	15	18	11	11	14	16	1	8	7	1	6	8	30	33	13	21	36	15	11	3	15	6	17	11	10	23	56	78	62	40	28	54	43	21	64	22
CH62	C1.9	002_300ug CBD	90	46	15	44	82	65	61	45	47	30	40	37	21	53	40	10	12	3	6	0	0	3	16	41	55	59	46	28	54	41	107	26	2	38	5	22	38	79	114	109	101	94	51	26	54	42	26
CH63	C1.10	002_300ug CBD	22	20	38	102	94	71	34	43	34	31	36	34	54	19	7	6	16	17	4	29	1	2	23	106	78	128	90	91	58	41	23	27	71	7	4	27	130	169	150	201	131	167	119	39	114	48	36
CH64	A1.11	000_Emulsion control tL	11	18	36	69	60	81	103	114	65	97	205	156	154	67	15	6	4	0	0	3	11	13	25	25	20	22	38	23	24	12	2	10	8	18	82	70	84	102	25	109	44	61	53	87	114	94	134
CH65	A1.12	000_Emulsion control tL	71	107	118	101	110	136	137	175	148	89	97	65	66	15	7	24	1	0	0	0	6	22	45	18	78	214	14	13	5	8	3	9	6	24	64	48	43	102	38	107	32	100	121	187	139	137	111
CH66	A1.13	000_Emulsion control tL	44	56	109	117	132	133	130	110	91	92	180	85	49	8	82	71	27	3	2	1	25	29	44	50	26	50	34	16	12	15	2	3	22	62	63	92	72	55	24	21	9	22	99	40	97	209	230
CH67	A1.14	000_Emulsion control tL	126	147	161	118	94	89	94	47	109	87	83	70	54	44	73	20	9	7	15	37	36	109	118	132	190	81	138	144	154	206	178	73	124	265	254	189	171	146	177	139	113	121	62	121	364	294	273
CH70	B1.10	003_400ug CBD	48	65	36	39	71	135	109	120	112	135	94	180	211	271	333	407	255	280	254	261	157	102	127	96	159	116	157	138	172	165	91	103	203	105	24	39	144	173	213	171	272	318	176	258	235	152	156
CH71	B1.11	003_400ug CBD	32	73	54	63	68	101	89	34	54	44	28	24	54	65	44	90	59	38	2	6	8	22	30	38	94	72	48	86	70	54	87	80	64	29	136	37	86	149	130	169	66	71	104	51	25	48	123
CH72	B1.12	003_400ug CBD	78	37	44	30	52	69	82	65	59	40	8	18	22	12	10	25	17	16	4	1	2	10	20	98	98	91	91	64	24	100	46	40	56	6	33	49	83	129	142	144	108	144	80	185	101	93	70
CH73	B1.13	003_400ug CBD	93	76	150	126	121	135	61	54	68	67	52	60	22	44	48	35	20	20	17	17	10	36	68	96	135	201	47	131	160	132	113	158	88	97	46	119	178	178	189	270	190	212	289	348	285	181	148
CH76	C1.11	002_300ug CBD	90	69	8	1	0	0	0	0	0	0	0	0	0	0	0	0	0	0	0	0	0	0	0	0	0	0	0	0	0	0	0	0	0	0	0	0	0	0	0	0	0	0	0	0	0	0	0
CH77	C1.12	002_300ug CBD	79	48	99	74	98	102	87	65	39	53	19	37	34	24	38	20	21	14	0	0	0	17	29	51	53	57	27	41	28	21	37	41	23	0	16	16	71	88	96	58	77	82	73	23	32	52	24
CH78	C1.13	002_300ug CBD	53	63	70	50	95	71	60	78	53	65	50	103	24	104	130	45	48	19	2	0	6	6	31	99	74	90	82	84	92	45	34	88	23	28	27	47	77	169	184	112	106	125	91	169	102	108	94
CH79	C1.14	002_300ug CBD	109	84	96	105	132	128	116	87	118	145	47	71	35	58	35	41	42	81	119	186	174	158	66	112	140	106	172	75	150	231	223	220	175	51	186	257	251	269	289	224	276	263	373	319	316	387	377
CH81	A1.15	000_Emulsion control tL	41	110	70	85	48	59	88	83	127	96	148	103	21	23	260	94	13	32	7	6	18	57	58	31	37	141	28	103	20	20	3	6	46	83	164	106	91	148	102	192	139	97	99	149	364	306	298
CH82	A1.16	000_Emulsion control tL	70	171	122	112	71	56	92	80	105	150	82	47	23	73	62	10	10	156	314	292	126	77	59	70	110	32	18	20	32	14	7	16	36	149	214	194	151	168	82	126	287	289	289	425	451	445	340
CH87	B1.14	003_400ug CBD	90	99	154	211	154	58	56	88	36	20	24	31	10	153	22	11	32	1	2	123	373	458	433	307	230	230	170	120	178	307	352	204	162	247	271	275	208	255	239	247	241	269	265	252	299	295	347
CH88	B1.15	003_400ug CBD	180	137	110	207	150	151	134	106	92	110	160	105	130	150	200	250	357	162	78	116	147	337	310	276	283	239	288	186	187	262	233	125	88	43	179	276	325	436	404	412	485	477	450	454	419	387	426
CH93	C1.15	002_300ug CBD	133	79	81	105	121	153	132	77	120	80	86	74	142	57	77	66	49	82	36	12	18	70	129	170	121	123	15	85	36	141	150	131	87	75	155	267	175	239	243	174	129	119	179	220	152	154	67
CH94	C1.16	002_300ug CBD	39	45	33	85	63	62	40	49	42	63	28	48	38	46	77	64	69	62	55	34	45	74	152	105	79	116	59	51	109	104	72	90	80	97	57	58	162	195	178	144	111	159	167	234	183	261	293
CH113	A2.0	001_Tween Control	16	1	0	0	0	0	0	0	0	0	0	0	0	1	0	0	0	0	0	0	0	0	0	0	0	0	0	0	0	0	0	0	0	0	0	0	0	0	0	0	0	0	0	0	0	0	0
CH114	A2.1	001_Tween Control	48	67	73	93	101	100	86	99	57	61	43	35	13	17	29	12	2	0	4	0	16	25	35	25	18	11	18	14	7	3	1	0	8	36	65	105	89	64	104	86	96	113	27	19	60	177	253
CH115	A2.2	001_Tween Control	60	114	179	143	78	86	64	63	54	68	80	34	70	23	29	145	116	13	14	34	31	34	56	56	38	45	9	15	37	57	8	21	25	77	114	141	129	94	112	133	91	68	145	179	144	217	255
CH118	B2.0	000_Emulsion control tL	28	0	0	0	0	0	0	0	0	0	0	0	0	0	0	0	0	0	0	0	0	0	0	0	0	0	0	0	0	0	0	0	0	0	0	0	0	0	0	0	0	0	0	0	0	0	0
CH119	B2.1	000_Emulsion control tL	43	44	139	95	65	76	118	95	62	42	64	28	36	25	32	19	11	6	11	25	19	58	32	52	58	28	33	24	26	41	24	39	27	29	36	41	62	50	52	29	22	13	23	15	17	82	65
CH120	B2.2	000_Emulsion control tL	48	52	64	100	100	94	105	86	88	37	56	86	47	34	10	18	50	5	1	7	7	19	12	34	31	16	5	11	19	10	2	5	7	21	20	53	54	100	49	21	26	21	30	24	11	42	184
CH121	B2.3	000_Emulsion control tL	48	128	135	133	134	109	99	98	95	124	188	95	118	160	45	94	10	2	42	4	41	57	35	58	55	43	28	30	199	21	95	153	87	27	89	153	98	117	139	136	264	293	115	102	35	91	151
CH124	C2.0	003_400ug CBD	50	48	25	16	44	35	116	132	123	133	79	30	73	15	76	62	120	26	31	12	0	3	32	34	27	19	53	41	5	53	9	26	11	89	0	14	32	41	35	66	23	66	10	122	32	23	59
CH125	C2.1	003_400ug CBD	64	60	76	54	43	38	32	25	21	37	73	46	35	15	30	40	35	97	5	52	23	7	17	20	17	29	21	14	21	14	24	19	8	13	12	4	25	7	15	42	71	40	20	18	20	31	17
CH126	C2.2	003_400ug CBD	37	28	47	20	22	35	22	44	30	47	51	12	32	5	16	13	20	5	20	66	4	3	2	12	5	18	36	10	11	3	19	22	17	0	3	4	1	7	85	93	51	97	19	45	13	1	10
CH128	A2.3	001_Tween Control	27	36	47	122	141	120	68	92	138	58	39	16	15	6	14	10	28	2	0	17	12	32	48	91	39	114	75	13	18	3	3	4	32	24	59	153	146	96	82	41	22	24	33	16	133	192	300
CH129	A2.4	001_Tween Control	25	36	44	94	100	104	100	75	49	49	33	19	15	5	0	0	0	0	0	0	1	9	26	39	36	32	33	8	2	4	13	8	45	35	73	66	84	91	51	32	35	8	36	19	35	97	147
CH130	A2.5	001_Tween Control	46	69	49	93	118	119	107	88	91	74	52	29	18	6	11	7	0	17	2	0	0	16	50	83	40	21	15	9	4	0	6	2	19	30	72	76	181	111	59	52	44	10	8	19	65	165	211
CH131	A2.6	001_Tween Control	83	100	126	116	129	118	105	93	96	61	51	50	12	24	19	6	0	0	4	4	12	30	36	36	26	41	20	0	5	2	2	1	22	50	135	115	137	128	98	90	149	41	54	75	130	251	286
CH132	A2.7	001_Tween Control	142	161	143	125	130	111	125	133	128	127	90	105	112	104	56	29	128	81	102	33	63	93	95	85	95	73	200	98	116	67	76	7	42	156	254	290	251	234	166	214	221	154	83	289	378	346	344
CH134	B2.4	000_Emulsion control tL	54	42	42	62	107	109	143	134	106	83	106	162	128	85	39	84	8	0	2	4	2	26	41	45	81	28	52	56	36	87	72	102	28	23	35	71	129	50	35	69	36	4	6	5	16	30	65
CH135	B2.5	000_Emulsion control tL	43	21	19	46	84	92	72	83	51	30	54	44	16	17	4	16	39	9	2	3	8	21	15	20	37	13	6	12	17	3	3	3	3	25	20	38	74	40	33	26	25	13	4	10	6	52	63
CH136	B2.6	000_Emulsion control tL	72	41	45	99	100	141	94	100	70	78	34	21	42	38	11	0	0	2	4	7	5	14	28	45	28	30	19	8	4	9	0	6	5	9	38	75	68	59	38	38	45	24	8	8	15	81	112
CH137	B2.7	000_Emulsion control tL	65	122	125	129	149	118	90	102	109	79	94	56	40	45	34	6	5	2	0	2	11	24	65	51	53	60	34	39	99	16	2	11	10	54	161	155	97	153	111	82	158	86	136	82	78	114	163
CH139	C2.3	003_400ug CBD	49	48	10	16	51	33	90	92	92	95	59	35	19	8	7	28	8	9	1	2	0	1	14	13	6	16	27	37	32	11	3	17	6	7	0	4	60	19	63	71	23	38	14	12	16	7	7
CH140	C2.4	003_400ug CBD	42	47	25	64	44	73	61	76	73	78	91	32	13	45	42	18	76	24	61	4	12	2	10	23	17	28	25	21	56	36	16	32	41	5	0	1	7	41	79	54	69	74	23	63	96	8	16
CH141	C2.5	003_400ug CBD	18	24	13	51	20	26	44	39	36	34	18	7	6	18	32	23	19	49	19	3	0	24	20	8	16	7	15	2	19	11	12	28	22	1	6	4	16	64	38	45	61	18	26	32	24	70	15
CH142	C2.6	003_400ug CBD	15	26	22	10	13	31	54	51	48	64	19	1	13	13	17	7	11	9	5	0	0	5	13	15	59	45	24	14	32	52	40	36	18	18	17	28	15	33	88	134	149	36	39	55	64	106	21
CH143	C2.7	003_400ug CBD	18	27	44	42	89	70	77	76	70	39	47	22	14	37	16	35	21	5	32	45	9	2	23	22	63	39	152	51	59	106	35	23	13	37	25	42	34	86	139	137	100	122	96	70	128	47	28
CH144	A2.8	001_Tween Control	41	39	46	79	145	112	101	102	80	70	42	24	24	17	13	15	9	6	11	15	13	42	43	56	61	82	44	60	32	35	45	68	31	46	98	165	81	97	201	87	56	35	36	10	51	128	152
CH145	A2.9	001_Tween Control	27	37	53	100	131	131	101	71	53	50	27	21	14	22	7	2	0	1	2	2	12	32	28	67	41	30	31	7	6	8	4	3	0	27	53	78	64	43	47	25	28	20	4	4	26	60	89
CH146	A2.10	001_Tween Control	41	54	75	146	141	121	110	134	106	55	58	35	30	4	7	0	0	0	0	1	13	26	30	53	67	28	58	9	5	1	3	0	10	29	87	70	67	97	63	38	33	17	7	12	30	100	161
CH147	A2.11	001_Tween Control	85	127	123	126	122	109	132	104	109	98	58	48	17	35	4	14	0	0	0	0	14	36	65	81	56	43	26	18	18	11	5	10	15	57	164	188	188	152	178	173	163	88	28	38	134	297	310
CH148	A2.12	001_Tween Control	180	213	183	180	161	187	166	148	187	173	172	185	181	128	124	57	8	8	4	10	61	118	158	143	96	124	148	56	68	70	56	31	144	290	367	361	321	271	269	268	209	229	215	280	452	443	453
CH150	B2.8	000_Emulsion control tL	49	54	36	58	94	104	142	124	95	93	83	34	107	245	225	65	23	4	2	6	9	25	37	42	38	82	32	46	15	49	195	77	66	33	85	81	70	133	97	40	19	12	12	3	4	33	173
CH151	B2.9	000_Emulsion control tL	94	48	50	57	68	110	87	86	87	62	76	90	71	16	27	18	20	9	13	57	18	11	26	22	24	32	11	1	14	8	18	1	7	32	28	59	69	63	77	146	34	115	116	26	78	32	82
CH152	B2.10	000_Emulsion control tL	57	56	64	89	108	95	80	82	84	55	73	20	29	16	15	2	2	2	2	8	4	12	56	32	43	52	7	13	20	6	12	8	9	34	53	82	91	60	51	53	30	51	36	15	23	41	76
CH153	B2.11	000_Emulsion control tL	107	140	179	175	145	149	129	104	113	94	92	50	51	47	24	42	32	0	3	6	3	57	93	142	135	131	85	86	128	117	51	88	18	127	171	266	212	159	210	212	242	112	116	37	75	182	235
CH155	C2.8	003_400ug CBD	56	70	44	47	66	73	124	120	108	126	63	43	52	108	70	52	64	16	41	8	29	2	11	70	28	65	114	78	57	34	170	129	154	65	19	27	57	62	129	105	101	76	134	147	110	35	61
CH156	C2.9	003_400ug CBD	91	39	102	90	88	61	63	71	99	78	88	41	52	73	37	118	71	49	43	32	10	6	32	27	15	49	61	153	53	145	32	34	89	155	128	2	77	95	97	129	171	164	80	54	29	38	36
CH157	C2.10	003_400ug CBD	71	74	82	43	59	80	76	55	51	50	33	50	34	40	60	30	29	14	20	6	7	8	52	18	30	34	73	74	71	39	20	36	34	25	13	9	36	92	161	56	70	95	33	9	23	24	20
CH158	C2.11	003_400ug CBD	40	21	27	45	66	54	90	51	17	38	72	36	9	41	56	62	18	15	3	4	39	36	49	41	36	48	31	76	43	26	26	24	22	85	6	5	21	63	108	118	101	86	53	66	45	39	24
CH159	C2.12	003_400ug CBD	40	13	79	39	89	128	72	69	86	84	15	36	17	18	86	55	56	48	12	0	0	4	21	75	109	122	124	160	79	113	118	19	36	21	6	34	60	144	157	225	182	148	138	151	78	141	60
CH160	A2.13	001_Tween Control	15	40	52	84	107	129	93	101	127	99	68	97	56	58	53	28	7	3	2	5	13	52	47	101	91	79	146	90	48	39	4	2	25	68	85	110	104	110	141	110	73	94	98	195	237	217	207
CH161	A2.14	001_Tween Control	45	49	61	118	115	143	105	130	123	63	56	47	20	16	94	1	2	8	0	0	8	40	46	49	53	36	37	7	29	16	4	0	13	33	77	75	66	41	35	34	79	22	11	4	52	109	161
CH162	A2.15	001_Tween Control	42	89	115	134	114	144	125	108	111	89	57	32	43	20	11	10	0	0	0	1	21	59	73	51	76	49	33	19	33	22	11	5	53	91	91	172	124	147	90	128	81	61	39	10	126	238	200
CH163	A2.16	001_Tween Control	81	147	215	173	123	117	119	109	96	81	80	90	68	92	101	81	46	26	38	65	93	199	162	186	177	211	265	228	234	222	143	114	195	245	289	264	274	267	213	251	193	198	192	206	356	355	308
CH166	B2.12	000_Emulsion control tL	48	74	64	94	86	123	146	118	101	105	170	70	84	78	27	72	22	11	3	8	22	23	26	98	133	56	61	14	37	14	10	15	29	44	85	111	105	108	54	76	23	51	108	61	77	100	170
CH167	B2.13	000_Emulsion control tL	41	78	75	92	94	114	85	58	69	43	95	48	32	24	39	39	43	159	17	52	65	29	36	23	34	39	26	15	8	12	11	1	6	82	73	78	109	76	124	130	87	91	146	39	27	117	215
CH168	B2.14	000_Emulsion control tL	116	97	135	141	120	115	94	86	108	85	62	102	68	58	24	4	4	1	0	1	19	111	45	90	55	49	33	72	24	26	23	4	63	65	95	160	183	247	169	239	99	190	89	145	88	207	309
CH169	B2.15	000_Emulsion control tL	128	179	173	174	153	168	132	100	120	137	107	142	82	123	88	51	28	33	20	30	90	276	294	284	219	168	185	155	324	331	347	347	303	342	393	370	342	265	278	361	420	388	397	318	374	390	392
CH172	C2.13	003_400ug CBD	77	65	66	148	121	116	89	109	131	66	85	75	113	68	217	100	161	264	238	113	47	67	177	88	85	114	123	145	242	167	100	159	146	83	58	186	107	117	209	219	213	131	222	197	188	221	323
CH173	C2.14	003_400ug CBD	98	31	88	79	73	90	68	113	68	59	61	35	97	71	57	97	45	25	70	28	10	9	4	34	102	103	94	197	197	87	63	21	102	54	13	40	35	164	185	134	169	171	127	121	164	54	89
CH174	C2.15	003_400ug CBD	70	59	36	29	59	79	113	55	90	71	63	30	35	80	128	75	88	41	20	0	3	43	17	41	203	98	117	77	119	234	199	68	54	34	82	38	78	141	116	151	144	159	82	96	143	39	158
CH175	C2.16	003_400ug CBD	28	12	30	49	66	71	73	65	44	52	22	51	63	18	70	21	53	45	70	52	8	9	31	127	153	190	85	74	130	119	56	81	159	153	120	120	280	330	324	324	319	343	290	348	394	357	355
CH208	A3.0	002_300ug CBD	18	33	37	81	128	158	160	141	91	84	156	161	99	62	69	153	105	6	5	17	35	16	33	9	48	58	87	107	23	33	7	36	5	5	28	61	54	167	88	99	46	37	66	34	7	11	41
CH209	A3.1	002_300ug CBD	42	4	26	23	89	86	60	110	93	89	69	29	27	62	25	145	81	78	4	3	23	9	11	24	10	48	27	31	20	92	4	5	4	9	59	39	84	38	102	54	27	122	2	77	9	19	29
CH210	A3.2	002_300ug CBD	26	25	46	53	43	47	66	66	65	52	84	12	24	35	28	15	8	2	6	0	15	12	28	50	44	19	11	5	27	17	16	29	2	28	47	102	95	96	50	113	74	95	43	65	7	27	40
CH211	A3.3	002_300ug CBD	34	53	112	73	55	28	37	24	25	15	27	21	36	44	39	26	15	12	19	39	32	41	44	57	49	53	42	54	103	52	14	32	35	37	35	54	85	83	86	81	29	84	24	26	15	55	57
CH214	B3.0	001_Tween Control	30	80	100	130	149	166	135	167	165	158	133	139	99	134	40	84	46	18	76	9	4	17	23	78	109	66	79	43	133	25	33	24	8	20	44	147	144	123	125	131	74	64	59	25	23	35	130
CH215	B3.1	001_Tween Control	70	30	44	70	79	109	111	79	127	102	50	44	53	27	41	10	7	0	3	7	20	13	18	22	22	27	21	28	25	10	3	3	1	2	33	61	98	157	85	107	42	82	46	15	6	31	119
CH216	B3.2	001_Tween Control	79	76	113	81	93	139	128	120	114	56	56	25	38	15	28	28	4	7	0	10	2	53	20	34	28	41	46	10	17	8	2	0	4	10	43	66	102	148	106	96	65	77	42	17	23	42	148
CH217	B3.3	001_Tween Control	109	118	148	139	131	120	140	83	103	79	73	49	68	54	91	43	13	13	11	27	6	22	42	68	67	51	50	95	62	27	14	17	28	36	59	125	203	202	171	141	177	193	141	131	156	120	265
CH220	C3.0	000_Emulsion control tL	120	44	68	78	70	126	155	147	165	102	115	103	98	43	47	13	36	11	0	3	2	4	19	47	89	48	89	59	33	9	4	10	7	20	12	130	189	135	113	235	81	35	20	19	5	9	36
CH221	C3.1	000_Emulsion control tL	58	43	57	87	98	109	106	82	84	46	79	69	72	34	26	33	30	6	4	0	0	2	6	43	27	36	57	28	20	29	70	21	5	0	5	21	52	67	91	58	37	33	32	12	13	9	5
CH222	C3.2	000_Emulsion control tL	53	72	151	129	95	94	79	50	52	54	61	42	27	13	22	29	9	9	4	10	44	24	97	40	40	49	25	24	29	35	33	50	13	15	18	69	74	83	139	72	49	66	28	46	17	11	31
CH223	C3.3	000_Emulsion control tL	34	115	148	144	139	147	144	120	94	102	93	113	80	40	74	95	53	67	0	1	9	34	23	38	52	82	32	33	12	22	36	74	167	98	51	43	253	215	207	182	153	251	211	183	159	24	92
CH224	A3.4	002_300ug CBD	23	25	67	33	46	63	94	139	60	69	53	9	61	17	28	26	16	4	68	10	5	15	28	83	46	102	48	29	40	108	31	43	39	16	34	64	27	66	104	28	10	136	7	50	7	27	74
CH225	A3.5	002_300ug CBD	64	58	20	24	43	74	89	57	98	24	39	41	17	9	45	48	14	5	23	1	6	27	41	20	30	61	12	29	56	18	70	83	6	17	15	43	77	109	129	129	101	50	17	62	10	25	51
CH226	A3.6	002_300ug CBD	72	54	55	46	64	59	37	30	45	25	61	101	46	15	17	49	25	2	3	10	12	37	23	24	46	63	42	4	19	35	6	24	4	23	40	92	94	111	62	64	46	41	115	160	94	84	68
CH227	A3.7	002_300ug CBD	45	73	83	62	82	65	24	30	11	43	36	14	11	10	4	15	2	5	0	0	1	23	42	42	83	17	20	5	30	36	45	74	4	21	37	100	123	105	131	68	34	126	96	37	20	52	102
CH228	A3.8	002_300ug CBD	72	106	170	125	65	49	31	43	40	28	20	28	13	53	65	23	25	293	206	162	204	49	52	94	96	38	123	69	88	109	52	60	45	48	63	99	188	145	162	214	265	291	227	138	199	246	254
CH230	B3.4	001_Tween Control	66	29	68	101	106	130	129	94	110	117	85	49	44	59	8	22	6	2	1	24	10	7	32	56	67	50	33	33	18	13	77	8	6	16	20	34	95	78	61	106	31	63	45	17	12	27	54
CH231	B3.5	001_Tween Control	71	38	69	76	120	119	135	111	101	96	40	30	27	19	55	21	7	3	0	5	0	15	66	17	28	97	32	23	16	14	6	7	0	20	100	75	67	107	71	40	45	43	29	20	3	23	88
CH232	B3.6	001_Tween Control	88	54	119	114	82	95	120	88	83	61	75	61	58	39	33	36	15	11	11	23	9	20	56	53	59	58	66	17	43	33	31	22	22	37	62	127	179	247	199	80	68	58	44	35	47	128	198
CH233	B3.7	001_Tween Control	158	124	130	83	113	137	127	111	116	91	67	62	50	47	21	12	0	3	0	5	21	104	47	56	74	54	28	79	47	24	53	6	6	46	113	189	224	253	247	196	221	198	87	63	92	159	200
CH235	C3.4	000_Emulsion control tL	36	34	13	17	26	44	35	40	49	48	59	48	12	5	3	4	9	1	3	2	9	4	7	34	27	38	67	33	15	15	4	5	0	8	8	20	30	32	43	23	18	11	4	3	3	11	19
CH236	C3.5	000_Emulsion control tL	131	64	29	33	34	52	91	93	78	67	64	37	9	15	7	7	15	0	0	0	0	3	9	12	30	49	60	6	13	52	56	8	24	4	7	10	59	60	60	32	32	38	19	9	3	14	14
CH237	C3.6	000_Emulsion control tL	127	78	54	54	64	94	91	134	90	51	58	59	30	7	11	12	13	8	0	3	2	6	9	40	39	37	12	32	8	33	7	5	3	8	15	38	62	58	81	46	33	28	29	28	56	78	17
CH238	C3.7	000_Emulsion control tL	48	60	81	113	108	117	115	97	99	80	66	73	55	24	28	15	0	2	3	0	0	18	39	40	50	34	39	21	24	11	15	10	0	4	27	36	74	81	143	98	80	116	133	54	78	39	13
CH239	C3.8	000_Emulsion control tL	36	137	157	145	129	141	148	110	78	85	81	49	56	52	49	48	14	8	5	9	7	13	38	48	58	71	86	52	81	28	81	48	10	18	33	88	125	154	182	169	166	172	157	87	63	101	57
CH240	A3.9	002_300ug CBD	27	18	114	98	77	85	115	125	80	65	58	66	39	53	35	21	9	32	3	0	0	7	13	49	213	243	218	80	250	199	228	35	38	72	161	190	123	137	93	19	114	84	94	80	18	27	27
CH241	A3.10	002_300ug CBD	22	49	48	45	67	60	93	101	66	65	40	8	28	15	12	11	6	1	5	12	2	70	35	54	103	109	47	20	18	69	27	32	59	33	44	75	44	120	102	27	54	40	60	48	31	33	95
CH242	A3.11	002_300ug CBD	49	11	58	66	57	77	75	68	43	73	35	61	38	38	85	49	31	18	2	2	5	54	21	29	56	36	84	100	78	21	23	78	9	41	31	81	107	97	95	34	135	46	30	22	30	24	95
CH243	A3.12	002_300ug CBD	106	44	44	66	105	52	62	52	32	49	18	44	19	53	29	44	14	5	6	0	10	43	60	72	95	53	93	73	61	84	47	35	6	36	86	121	136	153	139	169	74	111	124	48	128	58	168
CH244	A3.13	002_300ug CBD	77	74	81	123	122	71	56	49	33	35	35	36	19	11	19	34	30	23	45	0	7	48	65	68	98	90	52	122	100	62	64	201	149	100	116	134	158	164	115	147	95	141	143	87	138	254	300
CH246	B3.8	001_Tween Control	55	49	69	118	124	120	104	113	103	71	72	44	22	9	21	21	61	4	6	15	3	18	32	55	96	44	27	30	23	46	19	13	14	25	47	59	76	56	52	59	116	107	22	24	15	25	42
CH247	B3.9	001_Tween Control	76	34	79	97	101	134	135	106	105	76	66	63	61	49	81	13	9	0	0	3	3	20	42	38	43	35	37	17	18	84	31	10	13	12	33	68	86	94	143	86	59	43	13	13	9	34	108
CH248	B3.10	001_Tween Control	92	68	103	130	105	144	121	106	91	86	67	58	47	33	56	15	8	2	2	0	7	35	54	72	65	55	36	31	19	24	1	0	6	20	65	136	120	109	113	40	79	47	72	62	75	155	155
CH249	B3.11	001_Tween Control	95	152	145	181	135	131	132	119	138	101	114	124	44	53	48	22	9	4	0	9	20	41	138	147	138	124	106	117	101	109	36	34	11	66	171	282	254	276	198	218	290	290	287	208	224	214	314
CH251	C3.9	000_Emulsion control tL	17	8	15	17	19	22	30	36	25	45	34	59	29	15	11	3	6	2	0	1	4	3	9	7	21	24	22	18	10	1	4	4	2	4	12	12	35	27	30	30	17	8	9	5	7	5	7
CH252	C3.10	000_Emulsion control tL	101	30	34	49	71	67	84	95	88	85	55	41	22	33	24	7	17	36	5	0	2	51	26	22	40	35	13	13	12	19	8	3	0	16	165	40	46	63	73	38	90	78	23	144	5	0	10
CH253	C3.11	000_Emulsion control tL	78	23	35	53	57	50	66	73	73	54	31	42	33	8	10	35	12	9	3	1	5	17	16	22	30	29	19	31	20	13	3	7	1	11	18	28	71	77	72	44	29	25	64	61	20	10	22
CH254	C3.12	000_Emulsion control tL	35	51	71	81	88	79	80	72	78	50	61	41	21	33	26	3	10	3	4	0	2	5	35	43	41	56	41	33	16	9	48	29	6	8	24	46	63	113	141	86	83	66	37	101	84	16	48
CH255	C3.13	000_Emulsion control tL	49	123	157	160	167	153	142	152	117	118	117	135	96	44	68	40	30	14	0	5	10	41	104	144	175	193	177	178	182	231	93	113	138	20	61	180	280	287	257	332	302	338	296	301	100	95	64
CH257	A3.14	002_300ug CBD	36	73	113	83	90	77	99	108	62	65	58	65	141	69	68	75	115	206	109	57	56	100	95	106	76	94	46	72	137	165	106	104	39	122	309	212	159	98	97	137	93	191	315	284	170	109	80
CH258	A3.15	002_300ug CBD	82	34	50	52	48	53	62	32	33	32	37	30	29	30	9	28	36	8	58	67	7	29	76	94	111	90	51	88	49	27	49	83	114	38	79	142	187	116	102	39	35	46	85	68	33	41	159
CH259	A3.16	002_300ug CBD	60	34	94	93	155	56	70	48	76	139	162	119	54	181	110	173	32	16	1	0	33	99	165	212	159	187	139	98	120	103	192	280	62	139	220	277	282	282	315	313	316	392	374	417	424	424	413
CH262	B3.12	001_Tween Control	47	94	141	135	131	120	152	149	148	128	156	139	230	83	33	96	29	9	1	16	21	51	53	59	73	75	45	68	38	39	26	9	0	11	49	105	106	113	61	48	103	163	146	117	93	39	91
CH263	B3.13	001_Tween Control	72	89	126	118	95	111	91	112	102	85	88	42	42	64	33	26	17	7	15	21	12	35	52	77	82	36	43	26	31	23	14	21	12	23	47	89	104	87	71	56	67	31	145	188	118	85	115
CH264	B3.14	001_Tween Control	91	90	133	147	111	110	118	82	75	78	62	63	63	47	39	29	3	2	8	3	28	44	90	92	84	74	70	33	112	58	12	10	19	88	154	168	197	204	152	199	110	128	126	138	75	162	228
CH265	B3.15	001_Tween Control	101	206	210	233	202	180	133	150	170	154	208	198	170	244	228	244	318	119	116	173	349	460	447	396	396	339	319	382	464	461	444	452	448	502	450	469	453	420	403	442	425	425	429	386	396	483	471
CH268	C3.14	000_Emulsion control tL	96	95	105	115	110	113	148	149	120	129	128	101	110	140	218	131	43	11	4	46	70	12	32	61	76	67	43	31	24	62	88	107	11	6	25	58	99	116	143	135	83	73	114	131	39	91	146
CH269	C3.15	000_Emulsion control tL	72	80	136	142	118	163	162	162	116	83	93	70	44	60	49	24	10	1	2	1	8	10	30	66	50	30	36	24	11	21	7	7	1	7	25	50	65	115	120	106	178	139	111	110	151	64	123
CH270	C3.16	000_Emulsion control tL	64	84	163	135	104	132	122	105	106	78	110	60	69	53	40	20	10	7	7	5	10	18	67	67	54	38	29	37	18	24	30	17	67	40	81	156	235	225	159	133	135	219	79	134	98	72	107
CH289	A4.0	003_400ug CBD	12	1	5	21	11	30	40	39	36	50	20	23	5	18	13	13	3	3	9	2	5	11	14	34	29	3	8	3	7	26	20	15	3	2	4	25	21	35	35	35	63	29	50	23	19	14	24
CH290	A4.1	003_400ug CBD	22	37	28	32	47	49	50	63	61	50	40	19	102	54	17	115	92	73	80	16	24	28	17	19	38	16	16	46	27	25	60	40	15	36	28	57	60	108	30	33	144	92	80	106	76	78	14
CH295	B4.0	002_300ug CBD	25	25	62	32	79	74	87	84	71	58	38	61	74	74	54	51	115	14	21	16	17	24	47	38	41	61	29	36	49	27	21	82	78	5	10	79	73	73	71	98	146	32	48	64	100	33	45
CH296	B4.1	002_300ug CBD	48	30	63	67	36	27	29	24	50	24	47	82	75	33	19	63	16	0	0	7	11	24	43	60	64	18	13	5	73	15	22	3	4	45	23	28	36	48	63	75	27	7	34	98	62	106	70
CH301	C4.0	001_Tween Control	160	92	84	107	88	141	135	123	127	136	63	39	74	119	27	53	21	10	0	44	68	74	32	50	61	57	51	26	23	35	8	6	6	60	8	14	65	104	96	62	47	41	26	14	85	66	12
CH302	C4.1	001_Tween Control	101	86	85	56	82	72	119	94	109	86	116	91	77	47	44	167	73	49	89	95	17	21	21	80	47	106	55	40	21	25	16	3	8	4	9	41	74	120	164	152	118	45	41	38	23	4	23
CH304	A4.2	003_400ug CBD	32	10	4	23	31	7	13	76	114	75	138	54	104	159	291	277	263	230	59	47	87	60	30	115	77	19	79	52	154	63	41	75	36	40	10	50	24	86	34	131	62	58	62	128	43	60	88
CH305	A4.3	003_400ug CBD	21	18	14	33	70	80	58	38	60	66	43	15	39	82	9	26	26	85	217	344	392	210	115	52	27	126	68	63	100	92	51	52	12	22	4	5	80	79	60	88	135	72	37	48	68	39	101
CH306	A4.4	003_400ug CBD	37	30	24	18	82	69	48	48	27	23	23	19	30	60	14	10	33	12	22	47	1	11	75	45	66	29	34	15	14	17	11	36	30	20	12	43	22	32	79	14	74	122	47	96	88	44	12
CH307	A4.5	003_400ug CBD	43	42	104	80	58	79	59	21	44	24	48	19	20	22	63	40	16	17	22	43	18	37	39	32	29	21	68	57	67	40	9	42	26	23	42	35	69	73	60	64	45	32	35	36	16	30	66
CH310	B4.2	002_300ug CBD	54	27	61	125	54	102	110	83	101	138	107	119	52	120	144	50	38	58	9	63	69	101	52	90	67	136	30	57	119	68	33	16	19	18	21	66	93	97	83	67	128	71	22	32	11	74	39
CH311	B4.3	002_300ug CBD	55	72	48	64	69	104	84	74	88	49	94	33	13	26	66	34	29	10	3	5	14	10	26	47	39	64	110	50	10	22	39	23	4	27	64	87	38	61	32	71	53	15	90	26	57	20	14
CH312	B4.4	002_300ug CBD	58	35	49	82	67	65	41	56	49	68	28	16	42	15	20	42	21	0	19	4	0	10	43	30	37	27	35	17	92	21	31	16	17	49	46	48	35	55	62	51	17	10	39	171	154	69	56
CH313	B4.5	002_300ug CBD	60	63	142	139	83	65	29	55	38	43	57	35	41	38	98	38	83	29	33	59	129	84	68	88	70	62	37	36	93	78	23	50	42	38	30	44	109	91	63	74	92	73	105	64	22	18	79
CH316	C4.2	001_Tween Control	238	106	83	89	113	109	209	138	172	154	59	138	71	63	180	198	22	16	0	6	39	36	30	66	87	90	50	98	98	15	18	8	9	11	36	51	50	111	112	68	30	47	11	25	54	61	146
CH317	C4.3	001_Tween Control	66	45	56	68	81	73	77	80	87	70	51	30	20	15	11	2	11	3	3	0	14	4	12	18	38	47	77	23	80	13	6	0	4	3	9	19	43	72	65	35	24	30	11	65	22	7	9
CH318	C4.4	001_Tween Control	73	63	79	79	92	71	118	116	76	110	71	41	21	11	7	2	14	3	2	0	11	25	23	34	55	57	46	45	5	14	118	20	12	6	10	45	49	130	100	78	61	40	59	37	28	32	41
CH319	C4.5	001_Tween Control	68	174	203	175	157	164	177	160	170	137	101	80	60	66	31	69	14	66	10	17	16	30	47	60	82	102	72	66	47	54	162	69	34	47	54	64	154	191	196	146	255	111	113	99	82	7	55
CH320	A4.6	003_400ug CBD	39	53	94	40	39	43	46	73	81	67	38	39	9	20	42	15	26	6	5	8	5	10	23	35	7	40	56	49	54	30	182	171	70	15	66	66	55	48	96	49	69	92	126	75	74	27	20
CH321	A4.7	003_400ug CBD	27	36	36	36	37	26	41	51	19	25	8	17	0	0	2	2	38	25	22	10	27	3	2	7	28	67	68	99	65	50	30	65	15	36	18	29	32	62	76	129	84	67	99	75	5	38	32
CH322	A4.8	003_400ug CBD	42	60	20	39	28	40	46	27	26	36	37	34	7	36	10	33	22	10	14	0	4	0	14	13	20	22	37	41	26	79	52	43	38	71	106	60	75	100	57	65	79	65	69	84	182	120	88
CH323	A4.9	003_400ug CBD	71	80	51	41	62	69	32	38	22	21	33	43	35	15	44	47	39	9	41	16	28	7	19	44	59	53	74	33	102	40	4	10	20	30	32	40	87	140	143	133	107	162	132	29	47	19	35
CH324	A4.10	003_400ug CBD	109	153	175	166	106	91	139	44	67	36	27	51	80	81	59	36	28	19	71	49	70	126	118	92	117	125	113	73	80	110	84	120	104	129	64	73	103	194	128	184	174	185	119	211	137	174	165
CH326	B4.6	002_300ug CBD	16	37	44	49	43	99	99	158	121	102	112	88	131	106	158	356	315	213	124	84	166	129	48	64	63	121	100	135	170	56	44	86	110	6	22	88	84	84	45	34	78	52	115	55	116	7	14
CH327	B4.7	002_300ug CBD	68	29	56	35	16	45	43	58	47	61	17	34	33	45	12	15	29	15	5	12	0	15	46	58	64	9	6	54	59	37	8	36	32	6	10	64	38	63	35	13	9	23	101	19	53	26	14
CH328	B4.8	002_300ug CBD	46	25	41	13	34	45	46	57	56	27	9	10	12	43	38	39	28	25	5	5	13	4	31	27	29	20	43	16	15	5	12	32	13	3	7	32	63	94	76	90	30	15	57	23	52	51	27
CH329	B4.9	002_300ug CBD	38	6	66	93	93	68	56	39	32	38	23	13	8	2	10	7	8	6	3	0	0	23	63	45	56	62	55	37	57	85	122	106	61	21	22	56	74	121	135	120	87	51	107	52	16	53	12
CH331	C4.6	001_Tween Control	63	63	76	97	127	151	223	205	178	247	274	99	99	87	74	77	27	17	12	4	42	287	255	104	129	107	107	161	169	116	53	11	21	8	8	68	64	115	112	85	78	148	152	207	194	191	28
CH332	C4.7	001_Tween Control	79	30	34	61	95	88	117	122	45	56	43	29	42	30	7	16	13	10	1	5	19	37	29	48	66	57	46	14	3	10	7	6	3	5	17	30	58	91	62	49	43	71	129	48	14	5	15
CH333	C4.8	001_Tween Control	113	87	56	94	117	123	139	116	68	101	61	34	55	5	20	0	10	2	2	6	3	15	17	42	63	49	35	17	21	11	5	58	0	9	21	20	53	93	131	182	114	31	43	146	25	8	16
CH334	C4.9	001_Tween Control	43	81	88	111	107	119	95	149	72	54	74	40	27	19	8	11	7	1	1	0	7	7	22	48	85	71	128	50	22	35	12	6	4	7	11	49	80	189	161	147	65	56	70	110	119	34	32
CH335	C4.10	001_Tween Control	91	241	170	204	183	191	177	129	178	108	103	76	111	65	41	43	9	2	3	1	11	15	44	92	97	125	95	57	63	42	26	28	4	4	19	89	173	254	222	213	192	198	171	170	80	43	139
CH336	A4.11	003_400ug CBD	35	18	41	67	41	37	86	31	88	102	48	45	51	16	4	4	2	1	1	3	1	1	17	18	32	94	83	40	33	78	197	59	169	168	94	133	108	68	56	90	139	53	26	25	44	64	26
CH337	A4.12	003_400ug CBD	39	9	17	65	26	45	35	20	19	8	17	9	25	3	1	19	12	1	2	2	2	3	16	10	19	48	189	36	39	104	105	48	5	3	1	16	107	84	80	153	162	20	25	83	19	41	26
CH338	A4.13	003_400ug CBD	54	16	33	59	59	34	46	60	40	71	16	9	37	23	23	22	15	41	4	11	39	10	34	29	57	77	53	60	22	122	25	68	48	74	20	37	151	148	163	56	217	113	29	54	96	116	63
CH339	A4.14	003_400ug CBD	38	34	46	43	104	95	46	35	65	40	34	41	87	23	27	42	19	15	1	17	6	16	69	93	48	99	106	116	327	24	45	88	57	36	18	70	88	140	177	148	141	107	95	83	146	166	84
CH342	B4.10	002_300ug CBD	37	43	93	74	51	71	63	60	78	70	66	54	60	86	46	38	101	133	24	37	33	35	55	64	113	76	118	113	211	105	71	53	50	54	113	256	168	136	144	74	33	167	80	131	195	85	96
CH343	B4.11	002_300ug CBD	25	20	24	41	41	58	51	65	74	59	17	20	18	25	29	45	9	18	29	6	1	15	19	16	27	41	85	56	22	38	23	40	37	1	4	16	63	95	88	23	77	39	23	84	47	14	26
CH344	B4.12	002_300ug CBD	36	30	25	39	90	82	72	60	53	60	32	46	29	9	12	21	47	35	47	7	13	24	28	57	68	64	45	61	36	63	34	43	32	52	9	46	138	152	133	120	102	25	66	31	107	44	38
CH345	B4.13	002_300ug CBD	26	52	80	62	42	87	82	39	19	59	42	36	25	59	25	12	16	18	8	22	32	33	54	116	117	84	66	66	139	172	115	53	50	87	52	128	170	191	163	135	131	131	166	151	66	146	146
CH348	C4.11	001_Tween Control	51	24	45	77	119	102	114	110	88	102	60	61	23	20	19	10	19	6	2	6	21	27	34	35	68	44	41	40	23	9	16	12	45	9	17	32	48	77	71	47	75	51	37	23	8	5	7
CH349	C4.12	001_Tween Control	69	38	69	99	123	143	113	87	73	96	36	37	29	3	12	10	5	4	4	3	11	17	38	41	65	64	44	21	18	33	11	14	0	2	13	39	62	92	146	61	62	44	27	49	13	70	32
CH350	C4.13	001_Tween Control	32	81	105	137	129	118	118	108	98	71	38	65	53	33	27	18	10	4	0	4	9	2	25	58	87	83	53	39	18	32	39	10	6	26	14	83	138	210	133	168	122	140	161	71	79	27	48
CH351	C4.14	001_Tween Control	43	154	224	193	158	135	165	130	139	89	161	73	76	99	135	97	36	28	17	39	27	58	96	111	115	123	119	91	159	137	85	84	29	43	99	160	239	267	238	248	228	257	251	177	215	186	249
CH353	A4.15	003_400ug CBD	44	15	43	25	48	97	104	101	83	77	94	104	120	118	123	191	98	78	40	202	27	35	76	123	89	38	64	65	101	48	45	8	57	316	277	193	217	121	159	175	183	105	150	122	69	82	173
CH354	A4.16	003_400ug CBD	38	19	72	73	56	42	32	41	20	20	41	33	56	52	35	61	53	23	20	24	14	20	79	69	83	97	44	54	120	75	46	51	25	29	23	53	160	128	150	221	67	102	127	150	100	83	82
CH359	B4.14	002_300ug CBD	12	66	71	64	32	34	85	42	65	53	97	10	65	64	58	30	54	77	19	106	28	121	79	58	154	63	67	83	160	108	97	37	79	20	55	65	157	103	172	165	116	158	122	92	51	78	68
CH360	B4.15	002_300ug CBD	7	14	23	58	35	38	80	39	41	43	25	14	10	44	60	28	72	15	58	156	95	108	46	82	55	113	129	163	75	89	94	134	7	9	35	91	179	206	131	140	169	152	133	202	113	245	147
CH365	C4.15	001_Tween Control	47	83	102	111	130	123	116	105	71	66	53	38	36	29	29	21	21	8	17	29	38	70	70	73	74	55	36	37	36	35	23	37	26	65	34	80	130	150	113	102	157	141	232	125	114	76	222
CH366	C4.16	001_Tween Control	63	87	165	145	118	99	122	99	119	79	88	104	62	56	54	70	60	16	8	42	25	50	119	120	134	141	108	115	105	203	185	178	87	103	228	312	305	300	214	216	214	178	216	237	279	259	270
[truncated: 25 more columns]

## Sheet: CBD ex1 tR
DATE:	2023-05-26 12:28:16
FILE:	C:\Software\WMicrotracker One\wmicrotracker_w8_v30api\wmicrotracker\p00027\20230523_1222
SUBPROJECT:	2023 0526 wDAT CBD ex1 tR
<<<<<< Group Activity: Average Activity Counts per Data Interval>>>>>>
Group/Time[m]	60	120	180	240	300	360	420	480	540	600	660	720	780	840	900	960	1020	1080	1140	1200	1260	1320	1380	1440	1500	1560	1620	1680	1740	1800	1860	1920	1980	2040	2100	2160	2220	2280	2340	2400	2460	2520	2580	2640	2700	2760	2820	2880	2940
Emulsion Control	57	51	69	79	86	89	92	90	77	74	63	50	45	40	33	22	25	26	17	19	27	41	41	47	47	47	41	39	38	42	27	27	33	51	71	77	86	87	90	83	77	69	62	64	74	85	111	143	164
500ug CBD	33	26	32	35	28	37	44	49	45	44	44	38	39	38	42	42	45	45	44	43	30	34	33	40	50	56	62	64	67	65	56	55	49	52	47	49	59	71	85	92	92	91	89	74	75	74	62	68	78
750 ug CBD	34	29	37	26	22	24	28	35	34	35	34	35	38	36	30	39	36	37	40	37	36	30	26	31	35	39	50	49	49	63	56	58	51	54	51	48	52	46	39	49	72	82	90	92	80	76	78	68	72
1000 ug CBD	30	26	32	25	15	16	25	25	24	28	27	29	29	26	21	26	29	28	26	32	26	25	21	20	13	21	25	28	39	45	43	45	36	31	40	43	43	49	44	39	32	36	32	40	47	54	55	59	60
<<<<<< Group Activity: Standard Error >>>>>>
Group/Time[m]	60	120	180	240	300	360	420	480	540	600	660	720	780	840	900	960	1020	1080	1140	1200	1260	1320	1380	1440	1500	1560	1620	1680	1740	1800	1860	1920	1980	2040	2100	2160	2220	2280	2340	2400	2460	2520	2580	2640	2700	2760	2820	2880	2940
000_Emulsion Control	5.8	5.2	7.5	5.2	9.2	8.1	6.9	9.2	10.4	8.7	8.1	9.8	8.1	8.7	5.8	4	9.2	9.2	9.2	5.8	6.9	2.3	6.9	5.8	6.4	9.8	8.7	4.6	1.7	2.9	3.5	5.2	4	11	11.5	11	12.1	11.5	9.8	15	9.2	8.1	7.5	1.2	15.6	27.7	38.1	32.9	12.7
001_500ug CBD	4.6	0.6	4	4.6	4.6	5.2	1.7	4.6	4.6	4.6	6.9	6.9	2.9	2.3	5.2	6.9	4	9.8	6.9	8.7	9.2	8.1	11	13.3	12.7	4.6	7.5	12.1	8.7	8.7	5.2	9.2	6.9	6.9	9.2	7.5	15.6	12.1	16.2	9.2	14.4	13.9	6.9	6.9	8.1	11.5	13.3	6.9	9.8
002_750 ug CBD	4.6	5.8	4.6	3.5	3.5	9.8	3.5	6.9	8.1	2.3	4.6	2.9	3.5	2.3	4.6	4	4.6	2.3	6.9	5.2	11	6.4	2.3	6.9	4	6.4	4	2.9	1.2	1.7	8.1	5.2	6.4	6.4	8.7	6.9	2.3	1.2	2.3	10.4	11.5	9.8	4.6	6.9	8.1	1.7	9.2	2.3	5.2
003_1000 ug CBD	3.5	1.7	2.3	2.3	2.3	2.3	5.8	2.9	0.6	2.9	0.6	4	2.9	2.3	1.7	2.3	5.2	6.9	2.3	2.9	1.2	1.2	1.2	2.9	1.2	5.8	6.4	6.9	8.7	7.5	7.5	6.9	5.2	2.9	5.2	4	2.9	5.2	8.1	5.8	2.9	6.9	11	13.3	13.3	13.3	9.2	5.8	11.5
<<<<<< Group Activity: Number of wells/group >>>>>>
Group/Time[m]	60	120	180	240	300	360	420	480	540	600	660	720	780	840	900	960	1020	1080	1140	1200	1260	1320	1380	1440	1500	1560	1620	1680	1740	1800	1860	1920	1980	2040	2100	2160	2220	2280	2340	2400	2460	2520	2580	2640	2700	2760	2820	2880	2940
000_Emulsion Control	3	3	3	3	3	3	3	3	3	3	3	3	3	3	3	3	3	3	3	3	3	3	3	3	3	3	3	3	3	3	3	3	3	3	3	3	3	3	3	3	3	3	3	3	3	3	3	3	3
001_500ug CBD	3	3	3	3	3	3	3	3	3	3	3	3	3	3	3	3	3	3	3	3	3	3	3	3	3	3	3	3	3	3	3	3	3	3	3	3	3	3	3	3	3	3	3	3	3	3	3	3	3
002_750 ug CBD	3	3	3	3	3	3	3	3	3	3	3	3	3	3	3	3	3	3	3	3	3	3	3	3	3	3	3	3	3	3	3	3	3	3	3	3	3	3	3	3	3	3	3	3	3	3	3	3	3
003_1000 ug CBD	3	3	3	3	3	3	3	3	3	3	3	3	3	3	3	3	3	3	3	3	3	3	3	3	3	3	3	3	3	3	3	3	3	3	3	3	3	3	3	3	3	3	3	3	3	3	3	3	3
<<<<<< Number of Samples per Acquisition Interval [1unit=500values] >>>>>>
Time[m]	60	120	180	240	300	360	420	480	540	600	660	720	780	840	900	960	1020	1080	1140	1200	1260	1320	1380	1440	1500	1560	1620	1680	1740	1800	1860	1920	1980	2040	2100	2160	2220	2280	2340	2400	2460	2520	2580	2640	2700	2760	2820	2880	2940
#Samples	60	60	60	60	60	60	60	60	60	60	60	60	60	60	60	60	60	60	60	60	60	60	60	60	60	60	60	60	60	60	60	60	60	60	60	60	60	60	60	60	60	60	60	60	60	60	60	60	60
<<<<<< Average Temperature [°C] >>>>>>
Time[m]	60	120	180	240	300	360	420	480	540	600	660	720	780	840	900	960	1020	1080	1140	1200	1260	1320	1380	1440	1500	1560	1620	1680	1740	1800	1860	1920	1980	2040	2100	2160	2220	2280	2340	2400	2460	2520	2580	2640	2700	2760	2820	2880	2940
Temp[°C]	22.6	22.6	22.8	22.8	22.8	22.8	22.8	22.8	22.6	22.8	22.8	22.8	22.8	22.8	22.8	22.8	22.8	22.8	22.8	22.8	22.8	22.8	22.8	22.8	22.8	22.8	22.8	22.8	22.8	22.8	22.6	22.8	22.8	22.8	22.8	22.8	22.8	22.8	22.8	22.8	22.8	22.8	22.8	22.8	22.8	22.8	22.8	22.8	22.8
<<<<<< Well Activity >>>>>>
Well	Group/Time[m]	60	120	180	240	300	360	420	480	540	600	660	720	780	840	900	960	1020	1080	1140	1200	1260	1320	1380	1440	1500	1560	1620	1680	1740	1800	1860	1920	1980	2040	2100	2160	2220	2280	2340	2400	2460	2520	2580	2640	2700	2760	2820	2880
A1	000_Emulsion Control	47	40	55	69	70	73	79	71	58	58	46	30	29	23	24	15	7	8	3	10	26	42	43	39	34	29	24	31	35	44	23	21	39	68	90	83	69	64	71	54	62	55	48	65	103	133	160	172
B1	003_1000 ug CBD	32	23	28	24	12	15	17	30	23	29	28	23	28	30	18	28	36	42	22	27	28	26	19	18	14	32	34	39	50	48	42	44	47	29	46	49	47	58	60	49	38	47	53	64	71	79	70	69
C1	002_750 ug CBD	32	23	37	24	16	11	22	28	28	35	36	32	42	33	27	37	29	33	27	31	23	21	23	23	30	28	43	44	50	67	45	56	53	51	44	49	56	47	36	34	53	64	81	88	88	77	95	70
A2	001_500ug CBD	33	27	28	33	29	38	41	42	38	35	31	24	34	40	35	43	46	46	35	33	25	34	39	44	54	53	50	48	55	54	52	42	36	39	36	41	59	72	86	83	65	65	75	65	62	51	39	60
B2	000_Emulsion Control	58	55	71	84	101	100	103	98	93	75	70	58	50	44	31	28	37	40	34	30	39	44	51	59	52	51	48	47	40	46	34	37	35	56	73	92	109	103	98	101	75	68	74	65	68	84	137	179
C2	003_1000 ug CBD	35	29	35	30	15	13	21	22	23	32	26	37	35	26	21	22	19	20	29	32	26	26	23	17	11	13	13	15	22	31	30	33	29	28	44	35	44	40	37	38	29	24	17	19	26	34	39	58
A3	002_750 ug CBD	27	24	29	22	27	18	28	28	25	31	25	32	32	34	25	46	35	41	44	48	27	27	31	45	43	49	57	54	47	61	52	50	39	44	41	36	48	46	43	69	92	98	93	106	89	79	64	71
B3	001_500ug CBD	41	26	40	44	35	45	46	49	54	48	52	44	44	41	53	53	52	62	58	60	48	48	49	61	69	65	75	88	83	82	66	72	59	62	65	64	86	92	113	111	115	112	99	87	89	87	85	82
C3	000_Emulsion Control	66	57	81	85	88	94	93	100	79	88	72	61	56	53	43	23	32	30	15	18	16	36	28	44	54	62	52	40	38	36	23	23	25	30	50	56	81	94	102	95	94	83	63	61	51	37	36	77
A4	003_1000 ug CBD	24	26	32	22	19	20	36	22	25	22	27	28	25	22	23	29	32	21	27	36	25	22	21	26	13	18	28	31	45	57	56	57	33	37	29	45	38	48	36	30	29	36	27	36	44	48	57	49
B4	002_750 ug CBD	43	40	45	33	22	43	34	48	50	39	41	40	41	41	39	33	44	37	49	33	57	42	24	24	31	40	50	48	50	62	72	67	60	66	69	60	51	44	37	44	71	84	95	83	64	73	74	64
C4	001_500ug CBD	26	26	27	28	19	28	44	57	44	49	50	45	38	34	39	30	38	28	40	36	17	21	12	16	26	49	62	57	62	60	49	50	53	55	41	42	32	50	57	82	96	95	93	69	75	84	62	63
<<<<<< Channel Activity >>>>>>
Channel	Well	Group/Time[m]	60	120	180	240	300	360	420	480	540	600	660	720	780	840	900	960	1020	1080	1140	1200	1260	1320	1380	1440	1500	1560	1620	1680	1740	1800	1860	1920	1980	2040	2100	2160	2220	2280	2340	2400	2460	2520	2580	2640	2700	2760	2820
CH17	A1.0	000_Emulsion Control	14	7	1	2	1	0	0	0	0	0	0	0	0	0	0	0	0	0	0	0	0	0	0	0	0	0	0	0	0	0	0	0	0	0	0	0	0	0	0	0	0	0	0	0	0	0	0
CH18	A1.1	000_Emulsion Control	52	43	81	114	62	78	80	60	64	38	59	28	31	27	18	10	10	15	10	35	8	25	40	39	25	17	22	17	24	55	5	12	9	33	46	38	44	54	51	27	19	23	33	26	34	82	90
CH23	B1.0	003_1000 ug CBD	22	0	0	0	0	0	0	0	0	0	0	0	0	0	0	0	0	0	0	0	0	0	0	0	0	0	0	0	0	0	0	0	0	0	0	0	0	0	0	0	0	0	0	0	0	0	0
CH24	B1.1	003_1000 ug CBD	17	4	6	14	3	3	3	2	0	7	0	2	3	2	1	4	2	4	6	4	0	1	6	8	1	6	1	1	16	10	6	1	0	2	1	1	2	2	0	0	0	2	3	0	6	1	4
CH29	C1.0	002_750 ug CBD	13	8	16	8	4	0	23	0	0	37	2	9	4	0	0	5	13	7	30	0	2	21	0	0	0	6	0	0	0	1	0	0	0	54	6	19	6	37	65	0	7	4	5	4	13	27	19
CH30	C1.1	002_750 ug CBD	35	26	47	45	13	7	6	5	21	10	14	58	55	11	26	36	10	5	18	17	5	12	25	32	13	12	10	8	17	36	12	16	15	20	14	7	83	4	8	5	7	7	80	14	67	7	11
CH32	A1.2	000_Emulsion Control	33	48	32	51	71	73	98	76	65	47	42	37	26	5	14	6	0	1	2	18	34	12	22	37	41	18	10	9	11	2	5	1	5	23	17	43	27	13	10	7	1	0	0	2	12	52	146
CH33	A1.3	000_Emulsion Control	38	54	64	87	63	75	97	77	43	45	28	25	9	15	3	6	2	5	2	7	3	20	42	26	52	11	8	1	3	35	3	7	2	25	48	27	26	8	7	10	3	21	2	1	9	42	68
CH34	A1.4	000_Emulsion Control	40	15	42	36	74	85	98	84	74	36	38	14	5	13	9	31	7	0	1	3	12	17	22	11	9	16	9	2	2	4	3	5	4	8	29	24	40	14	12	7	6	8	0	0	14	60	96
CH35	A1.5	000_Emulsion Control	43	46	87	80	89	74	114	82	98	62	54	44	27	30	10	21	18	2	0	6	11	25	34	40	34	20	7	6	35	19	8	28	29	27	124	85	96	102	43	22	42	10	5	3	37	114	174
CH38	B1.2	003_1000 ug CBD	27	6	4	8	7	3	4	10	34	71	12	19	11	24	6	7	25	12	7	17	21	7	7	5	0	5	11	0	10	0	0	0	118	0	1	9	8	0	0	0	57	11	3	2	14	39	3
CH39	B1.3	003_1000 ug CBD	39	10	16	2	10	3	23	43	4	11	15	33	8	7	9	12	16	7	0	0	0	0	14	3	0	8	0	0	13	3	12	10	2	2	0	2	14	12	5	10	0	1	0	0	7	30	1
CH40	B1.4	003_1000 ug CBD	21	18	13	17	5	6	2	3	6	3	11	5	10	16	5	8	7	9	5	16	3	0	33	56	34	38	22	9	2	6	7	7	2	14	3	2	10	2	0	2	11	4	5	10	36	4	7
CH41	B1.5	003_1000 ug CBD	20	13	23	49	23	20	15	11	29	18	9	2	17	17	7	12	137	98	28	22	8	4	17	25	15	13	10	7	10	11	13	35	7	20	11	13	44	6	5	8	8	10	13	7	11	24	82
CH44	C1.2	002_750 ug CBD	26	11	17	13	0	13	0	32	24	15	14	13	9	14	0	0	2	14	4	5	2	0	10	0	0	4	1	0	0	25	3	19	0	12	0	0	4	10	0	10	5	0	1	19	7	11	47
CH45	C1.3	002_750 ug CBD	19	16	79	26	48	3	5	0	8	13	10	1	8	5	5	4	15	3	4	7	2	3	12	7	8	4	3	3	2	1	7	11	1	13	4	5	17	14	1	4	2	3	8	20	15	14	8
CH46	C1.4	002_750 ug CBD	11	2	2	7	7	5	4	2	0	1	1	7	12	25	0	6	1	1	6	4	4	2	0	0	0	5	4	0	0	0	27	3	43	1	7	37	28	37	11	0	10	3	4	10	36	25	27
CH47	C1.5	002_750 ug CBD	28	22	45	57	25	15	36	9	26	25	44	25	17	12	11	9	14	18	16	22	35	42	18	26	23	9	27	58	64	25	30	27	33	55	14	116	109	11	78	13	34	20	24	84	51	21	42
CH48	A1.6	000_Emulsion Control	49	23	40	64	43	62	62	48	45	54	21	17	4	7	13	8	0	0	0	8	5	7	11	21	18	8	0	11	43	6	0	2	12	13	38	55	55	25	58	34	62	4	0	0	12	72	173
CH49	A1.7	000_Emulsion Control	35	19	41	74	70	93	87	81	39	66	47	15	30	9	3	6	0	0	0	12	15	19	25	21	28	17	8	2	13	59	12	9	16	20	32	31	21	18	10	12	5	2	4	4	16	44	111
CH50	A1.8	000_Emulsion Control	45	40	39	105	117	134	140	121	79	73	38	42	17	13	4	8	0	0	9	2	21	19	55	46	36	20	4	2	3	1	3	4	6	30	53	62	36	24	37	36	31	10	9	7	24	55	142
CH51	A1.9	000_Emulsion Control	67	51	96	104	130	130	142	150	86	182	81	70	49	42	38	25	6	0	5	9	42	47	65	70	24	34	25	17	12	5	5	0	27	52	93	163	98	129	110	16	29	15	10	20	114	224	223
CH52	A1.10	000_Emulsion Control	44	63	64	63	86	77	69	86	90	134	133	48	111	72	128	51	15	47	6	45	170	305	150	123	135	136	115	106	120	172	59	11	76	186	216	220	206	193	233	143	170	130	79	218	241	299	306
CH54	B1.6	003_1000 ug CBD	14	25	17	22	14	6	21	29	13	63	42	35	40	18	25	16	5	38	15	2	1	19	31	1	0	12	6	1	2	9	22	11	45	8	7	0	0	10	1	6	4	0	2	0	1	0	2
CH55	B1.7	003_1000 ug CBD	42	17	23	26	14	0	4	37	4	53	22	29	41	72	26	33	14	28	4	4	11	5	31	2	0	5	4	20	23	36	2	13	18	0	11	11	25	28	53	22	6	13	1	6	38	46	54
CH56	B1.8	003_1000 ug CBD	23	16	13	5	3	5	6	23	50	63	20	36	24	16	1	1	0	8	0	12	14	39	4	0	0	0	3	13	1	0	1	1	5	10	37	36	1	12	0	2	0	1	28	19	40	22	50
CH57	B1.9	003_1000 ug CBD	20	13	5	6	9	14	27	28	21	9	8	13	21	8	2	15	0	42	18	0	14	24	2	5	3	22	20	1	2	52	11	16	1	5	10	9	1	9	48	4	20	3	4	4	38	60	18
CH59	C1.6	002_750 ug CBD	38	32	102	37	69	15	56	119	63	164	156	118	230	193	114	219	146	179	85	18	38	4	58	73	97	80	174	153	128	264	151	213	165	158	66	64	19	113	48	6	64	96	131	166	160	118	187
CH60	C1.7	002_750 ug CBD	39	15	22	18	5	14	16	8	22	38	14	43	12	13	20	19	5	37	10	8	15	7	14	0	0	5	10	15	31	18	8	13	34	17	1	15	6	13	32	9	9	36	42	30	35	43	96
CH61	C1.8	002_750 ug CBD	23	1	14	2	6	2	17	23	25	11	16	5	6	9	6	12	9	1	23	10	6	0	0	6	1	0	2	10	4	1	17	10	16	7	14	30	38	24	9	3	10	11	56	65	22	45	63
CH62	C1.9	002_750 ug CBD	40	19	58	42	18	9	11	14	13	15	13	7	25	9	13	17	6	15	9	34	2	5	25	33	22	9	10	33	17	21	5	14	13	32	8	12	27	28	13	22	8	32	24	22	39	12	21
CH63	C1.10	002_750 ug CBD	24	21	28	34	20	19	5	11	15	13	17	4	22	12	18	0	5	7	5	24	12	10	21	7	5	13	29	41	29	86	33	24	5	27	11	7	38	17	1	6	15	52	81	48	120	56	133
CH64	A1.11	000_Emulsion Control	33	72	57	69	32	35	18	10	0	7	1	0	0	1	0	0	0	0	0	0	0	0	0	0	1	0	0	3	5	1	0	0	0	3	4	6	4	2	6	9	7	7	0	7	58	58	24
CH65	A1.12	000_Emulsion Control	60	40	61	69	74	65	73	92	80	42	26	22	15	6	13	11	6	0	3	6	13	16	36	39	25	57	7	5	5	1	0	1	6	29	35	45	26	43	43	11	10	3	2	17	74	84	143
CH66	A1.13	000_Emulsion Control	47	34	67	88	78	90	100	72	65	85	63	22	52	30	17	6	6	0	4	3	18	26	34	43	18	25	9	5	4	2	7	0	16	41	101	78	62	30	26	80	23	7	10	13	75	117	164
CH67	A1.14	000_Emulsion Control	128	107	136	143	156	142	139	136	132	96	130	93	83	81	98	56	32	52	0	10	32	102	123	103	68	85	53	49	109	100	15	30	120	292	339	260	237	257	271	190	175	155	149	160	331	336	339
CH70	B1.10	003_1000 ug CBD	66	11	10	1	0	0	0	0	0	0	0	0	0	0	0	0	0	0	0	0	0	0	0	0	0	0	0	0	0	0	0	0	0	0	0	0	0	0	0	0	0	0	0	0	0	0	0
CH71	B1.11	003_1000 ug CBD	32	59	33	34	11	43	11	35	74	17	37	6	36	29	16	11	2	25	14	19	14	18	2	0	10	7	73	35	33	65	60	34	58	44	50	120	76	112	124	67	22	64	63	113	126	175	77
CH72	B1.12	003_1000 ug CBD	36	19	18	19	6	10	33	26	9	7	14	2	18	8	8	20	11	20	14	23	32	2	1	2	3	0	0	40	25	11	34	81	68	57	31	53	41	62	98	39	25	35	20	130	100	137	66
CH73	B1.13	003_1000 ug CBD	58	73	171	138	63	49	60	64	36	43	71	62	89	68	64	82	118	55	50	98	97	47	65	68	48	95	53	47	147	100	42	99	73	51	69	105	138	93	57	87	61	66	72	54	111	108	92
CH76	C1.11	002_750 ug CBD	55	75	9	21	5	19	48	60	34	33	51	37	37	48	28	19	32	14	6	48	22	24	10	16	38	14	26	44	110	158	19	94	98	49	140	86	119	37	51	48	109	109	112	129	83	96	174
CH77	C1.12	002_750 ug CBD	61	42	41	11	4	0	15	49	51	25	36	32	28	43	32	47	57	29	19	23	7	30	12	1	10	28	99	42	23	55	54	134	89	133	95	88	77	72	40	8	20	96	147	84	107	119	87
CH78	C1.13	002_750 ug CBD	24	32	44	20	14	21	25	19	37	62	56	73	48	43	27	14	7	25	26	19	21	6	0	23	3	4	17	65	107	35	82	50	59	23	46	38	84	51	7	14	48	68	100	140	116	170	113
CH79	C1.14	002_750 ug CBD	11	6	11	10	6	7	31	26	57	53	25	36	30	7	26	46	26	56	38	44	50	0	1	2	17	16	17	42	51	48	32	63	83	31	46	56	40	16	4	20	42	48	94	117	120	70	79
CH81	A1.15	000_Emulsion Control	51	1	0	0	0	0	0	0	0	0	0	0	0	0	0	0	0	0	0	0	0	0	0	0	0	0	65	156	68	70	42	8	54	83	122	78	54	39	54	69	221	283	291	353	392	392	345
CH82	A1.16	000_Emulsion Control	13	13	28	24	43	26	25	37	27	18	18	30	41	45	44	9	9	9	4	14	50	66	67	46	71	32	59	134	144	218	232	236	283	298	226	193	134	142	232	250	256	254	228	275	309	234	169
CH87	B1.14	003_1000 ug CBD	57	72	95	40	18	76	61	128	66	69	134	83	100	150	87	157	185	242	106	141	198	191	57	58	71	270	308	339	386	316	332	254	232	153	326	266	270	377	418	354	294	377	457	450	422	428	451
CH88	B1.15	003_1000 ug CBD	20	6	8	6	2	6	6	35	22	27	48	34	25	37	39	62	48	80	78	75	33	64	28	60	40	29	26	115	137	146	129	136	124	104	183	151	118	205	158	186	107	166	174	223	192	185	216
CH93	C1.15	002_750 ug CBD	90	60	86	49	34	34	77	90	78	81	145	69	168	122	130	173	134	142	161	228	107	97	68	96	171	195	229	162	199	251	178	185	172	183	216	236	242	272	193	265	333	382	359	389	369	338	368
CH94	C1.16	002_750 ug CBD	7	0	1	0	0	0	2	4	1	2	3	2	1	3	4	10	17	15	7	23	63	90	115	76	101	76	70	77	64	109	103	70	68	52	54	9	7	47	53	139	182	115	114	149	144	136	138
CH113	A2.0	001_500ug CBD	19	9	19	43	23	39	38	61	10	3	8	0	0	0	0	0	0	0	0	0	0	0	0	0	0	0	0	0	0	0	0	0	0	0	0	0	0	0	0	0	0	0	0	0	0	0	0
CH114	A2.1	001_500ug CBD	32	15	7	3	30	17	39	19	33	48	51	4	2	9	29	37	12	15	5	9	1	11	15	32	34	4	13	5	27	49	57	4	2	2	2	47	12	11	8	17	22	14	57	44	20	38	3
CH115	A2.2	001_500ug CBD	47	51	96	66	16	27	70	19	26	23	29	8	53	25	42	107	61	33	19	25	12	25	53	50	46	25	51	11	65	98	39	29	36	43	65	36	38	31	65	43	37	21	39	26	26	36	26
CH118	B2.0	000_Emulsion Control	37	55	38	49	81	37	47	36	46	18	7	8	8	2	1	0	0	0	1	0	0	2	3	3	2	2	0	2	0	1	1	0	0	0	1	0	0	2	0	1	0	1	0	0	0	0	0
CH119	B2.1	000_Emulsion Control	71	36	48	68	105	127	115	86	111	93	71	36	38	17	11	15	10	0	0	39	16	21	25	34	38	14	21	17	3	5	3	5	6	25	47	54	58	62	54	48	44	40	4	4	18	17	116
CH120	B2.2	000_Emulsion Control	41	39	64	71	108	114	92	76	87	37	50	29	29	25	13	19	24	2	1	7	5	17	15	18	25	24	26	34	10	15	5	0	22	18	47	48	70	158	109	64	27	34	12	4	52	67	68
CH121	B2.3	000_Emulsion Control	20	56	68	87	81	49	60	71	71	62	60	43	103	91	38	37	26	40	6	4	59	50	29	53	37	51	23	46	25	9	10	14	8	36	47	91	120	161	178	223	99	45	178	100	87	64	147
CH124	C2.0	003_1000 ug CBD	35	83	14	2	0	0	0	0	0	0	0	0	0	0	0	0	0	0	0	0	0	0	0	0	0	0	0	0	0	0	0	0	0	0	0	0	0	0	0	0	0	0	0	0	0	0	0
CH125	C2.1	003_1000 ug CBD	30	24	2	0	10	9	23	8	0	24	10	2	4	6	5	0	0	0	8	2	14	2	0	4	8	0	0	0	0	0	0	0	0	0	4	36	0	2	0	0	0	0	0	0	3	0	5
CH126	C2.2	003_1000 ug CBD	18	14	11	5	0	4	4	0	4	3	4	1	7	10	1	3	3	9	7	1	0	0	4	1	1	1	1	0	0	0	2	0	16	4	8	0	1	12	18	0	3	1	2	0	0	4	7
CH128	A2.3	001_500ug CBD	62	34	40	37	32	13	53	67	60	49	54	41	32	15	49	16	102	112	40	19	9	40	51	56	68	23	107	30	26	7	39	37	11	4	78	9	14	18	54	103	41	53	18	74	85	4	17
CH129	A2.4	001_500ug CBD	17	0	2	10	22	15	57	56	38	24	28	16	26	12	9	18	14	7	4	3	1	19	12	28	15	18	2	1	0	17	46	33	27	23	25	4	15	67	30	68	74	3	0	38	17	2	1
CH130	A2.5	001_500ug CBD	41	24	11	45	29	46	42	18	18	27	27	17	29	30	3	29	13	10	19	2	1	5	43	3	9	45	9	3	9	69	12	18	27	16	14	0	6	80	30	62	71	105	74	6	29	34	22
CH131	A2.6	001_500ug CBD	42	38	34	23	28	25	8	19	10	11	9	17	9	35	8	4	3	4	4	4	0	0	16	28	36	19	36	61	20	38	29	38	49	1	44	32	41	91	81	33	83	59	60	35	15	10	9
CH132	A2.7	001_500ug CBD	12	9	8	5	4	3	4	8	4	2	6	0	0	0	0	0	0	0	0	0	0	0	1	0	1	0	0	0	0	0	0	0	0	1	0	3	0	2	1	3	0	0	0	1	0	1	1
CH134	B2.4	000_Emulsion Control	53	42	47	49	95	119	149	143	112	88	79	103	40	27	12	14	23	5	14	8	5	18	37	76	45	48	40	73	12	24	17	89	67	153	31	45	102	90	49	35	12	74	19	4	5	14	66
CH135	B2.5	000_Emulsion Control	30	9	36	67	72	87	91	112	99	59	65	41	24	28	7	14	3	3	5	2	22	5	6	27	17	23	14	6	7	10	2	3	3	11	24	45	45	36	49	69	23	11	9	1	2	14	32
CH136	B2.6	000_Emulsion Control	84	63	66	106	126	135	134	114	102	96	60	88	25	27	14	25	11	3	3	1	8	22	14	44	33	52	43	66	10	4	6	3	2	11	60	70	66	68	37	22	15	52	65	19	8	22	47
CH137	B2.7	000_Emulsion Control	86	99	151	152	117	113	105	98	116	78	56	66	106	24	14	53	18	8	1	15	7	12	31	35	60	52	23	13	9	35	22	4	4	12	35	71	107	167	132	63	93	43	26	9	17	69	109
CH139	C2.3	003_1000 ug CBD	33	21	38	34	23	6	12	21	51	61	55	86	103	57	59	23	3	0	69	3	69	0	6	3	0	5	7	1	6	0	2	0	17	2	22	14	43	53	32	8	12	0	10	0	0	8	5
CH140	C2.4	003_1000 ug CBD	26	42	19	13	42	5	17	8	19	5	11	19	14	14	2	2	25	13	9	53	9	6	0	0	4	22	14	15	0	12	36	59	51	7	0	0	0	9	10	3	3	0	0	1	0	0	6
CH141	C2.5	003_1000 ug CBD	33	5	12	8	1	5	3	17	24	28	8	17	5	20	4	19	1	2	1	0	2	3	4	0	8	0	2	3	0	2	0	0	3	10	15	14	24	24	13	8	13	0	0	16	16	8	9
CH142	C2.6	003_1000 ug CBD	34	17	12	5	9	4	6	0	10	49	20	15	2	25	2	0	0	2	4	5	0	14	1	2	0	0	0	0	2	19	7	0	4	0	0	0	0	10	6	14	5	2	5	11	7	25	9
CH143	C2.7	003_1000 ug CBD	25	24	41	46	9	8	11	10	3	5	7	8	14	12	18	7	16	4	18	15	0	16	25	22	16	6	9	5	17	40	28	14	7	11	16	19	33	11	4	13	4	10	8	9	38	24	26
CH144	A2.8	001_500ug CBD	21	17	10	28	24	34	32	48	67	39	23	32	0	4	14	29	55	55	4	0	2	4	37	9	55	65	66	106	95	71	52	75	66	117	13	58	88	107	123	119	96	91	123	85	104	72	39
CH145	A2.9	001_500ug CBD	20	26	15	16	37	23	45	43	33	29	24	11	16	2	3	2	13	4	11	1	6	7	16	20	46	30	19	24	44	45	102	45	29	22	50	31	47	44	121	112	58	33	52	73	52	53	0
CH146	A2.10	001_500ug CBD	28	7	14	6	14	26	12	25	6	20	2	7	24	39	17	8	1	12	0	5	0	12	8	10	38	43	54	39	14	15	32	29	2	3	10	14	39	61	75	76	68	68	85	118	47	20	20
CH147	A2.11	001_500ug CBD	46	46	27	61	53	66	51	40	55	21	8	25	55	25	32	21	4	10	0	5	0	9	18	60	78	57	40	74	112	21	55	50	54	73	5	27	100	102	114	140	102	56	81	61	99	20	12
CH148	A2.12	001_500ug CBD	57	22	32	34	24	33	23	10	20	30	8	5	3	4	4	13	15	17	26	22	14	62	58	42	31	38	37	27	33	18	23	23	30	48	25	39	68	57	69	79	77	74	66	62	24	8	41
CH150	B2.8	000_Emulsion Control	37	39	29	74	88	106	116	137	131	136	140	92	58	61	51	9	0	8	2	19	19	16	40	43	31	37	56	33	15	10	1	0	2	37	56	54	68	35	21	16	32	12	15	32	16	26	66
CH151	B2.9	000_Emulsion Control	55	33	40	64	90	106	112	138	124	85	83	70	62	40	40	17	14	4	1	1	3	16	11	35	24	43	23	10	12	11	12	0	7	13	33	67	47	36	38	15	17	14	68	22	11	33	69
CH152	B2.10	000_Emulsion Control	98	58	93	84	141	132	133	86	74	105	71	43	36	24	9	13	9	2	0	0	17	23	32	46	43	36	24	10	38	40	8	4	10	23	57	100	167	124	70	50	45	62	66	71	81	67	122
CH153	B2.11	000_Emulsion Control	96	85	108	131	121	136	114	90	72	93	69	63	32	66	33	23	17	6	6	0	7	24	59	69	106	89	96	66	111	50	61	55	33	68	127	170	245	133	161	162	132	114	96	88	68	122	266
CH155	C2.8	003_1000 ug CBD	76	39	60	44	52	30	82	106	98	116	114	173	133	72	64	132	87	146	122	50	33	34	21	36	0	50	3	24	18	40	66	29	5	27	23	78	19	58	32	45	61	42	19	1	3	51	18
CH156	C2.9	003_1000 ug CBD	24	7	4	2	0	0	4	3	3	14	12	4	9	15	6	17	3	4	5	3	10	2	1	0	0	7	14	6	0	1	17	9	4	11	5	7	24	14	16	18	19	3	15	15	16	30	29
CH157	C2.10	003_1000 ug CBD	36	19	23	1	9	5	32	19	15	29	17	18	12	3	0	14	19	28	37	10	33	11	3	2	6	0	5	8	3	17	3	10	26	29	71	21	69	24	45	18	12	9	26	11	40	18	35
CH158	C2.11	003_1000 ug CBD	31	18	52	41	7	2	21	54	15	51	5	20	6	4	15	5	26	19	9	5	5	37	19	10	4	3	2	3	8	7	21	28	9	25	44	23	6	49	31	46	30	4	16	7	19	14	10
CH159	C2.12	003_1000 ug CBD	49	60	109	110	42	46	44	64	50	55	46	36	88	49	30	23	37	35	61	145	20	38	39	64	32	34	15	73	176	139	77	55	74	65	179	28	62	22	51	44	43	20	45	26	37	33	59
CH160	A2.13	001_500ug CBD	29	45	10	18	88	116	95	96	143	130	124	116	267	317	294	354	410	401	366	407	353	346	255	232	257	223	242	192	272	275	234	180	181	192	136	221	220	200	266	228	191	270	374	292	300	284	254
CH161	A2.14	001_500ug CBD	30	28	32	35	9	45	34	55	46	66	41	46	14	72	25	26	23	27	35	7	7	16	23	64	64	122	53	107	14	65	80	57	49	39	116	85	130	108	188	107	70	97	118	58	100	136	100
CH162	A2.15	001_500ug CBD	18	19	16	39	37	72	34	48	49	29	50	33	15	36	22	29	10	27	39	20	2	7	9	33	79	83	94	99	116	28	43	40	16	34	1	21	77	134	124	105	55	82	81	57	26	79	35
CH163	A2.16	001_500ug CBD	41	66	98	92	30	52	57	74	31	37	36	23	41	49	49	45	47	48	22	34	24	18	45	87	67	112	33	40	90	109	41	57	38	43	33	70	102	111	105	109	68	80	50	74	117	67	77
CH166	B2.12	000_Emulsion Control	41	48	66	83	113	85	117	123	135	73	126	81	67	121	117	83	303	347	383	355	298	227	133	109	56	36	35	40	32	150	8	7	12	29	54	91	105	77	195	347	193	126	144	176	228	184	248
CH167	B2.13	000_Emulsion Control	70	79	89	63	106	101	128	108	66	46	49	51	50	17	26	19	11	2	8	2	4	16	35	37	40	26	27	17	11	5	2	0	1	12	39	76	49	123	75	87	67	61	8	25	56	155	175
CH168	B2.14	000_Emulsion Control	51	30	75	79	55	58	46	51	40	44	38	25	12	30	16	11	5	3	3	5	6	19	38	46	57	29	35	18	42	32	11	21	14	49	129	161	152	87	65	99	53	76	106	72	47	103	249
CH169	B2.15	000_Emulsion Control	65	105	123	112	114	90	90	107	97	94	91	92	109	101	95	92	119	206	112	30	152	213	303	268	219	260	279	305	300	336	368	383	367	393	383	331	339	296	331	314	351	321	371	409	388	390	406
CH172	C2.13	003_1000 ug CBD	71	87	127	151	43	78	55	48	54	55	83	146	126	124	81	64	42	64	82	162	133	163	230	117	97	52	110	81	74	138	124	207	134	129	136	150	237	281	204	251	175	107	80	86	81	153	142
CH173	C2.14	003_1000 ug CBD	45	29	39	27	10	6	16	3	23	31	7	26	49	19	32	35	31	2	37	74	61	30	17	4	2	29	21	23	27	24	75	60	89	71	138	106	99	72	90	98	63	86	26	58	75	66	119
CH174	C2.15	003_1000 ug CBD	23	8	22	17	3	9	21	4	8	6	26	26	17	12	28	16	17	9	4	5	28	12	6	10	11	2	3	4	18	40	19	39	37	35	41	32	51	23	24	26	21	56	8	57	69	51	123
CH175	C2.16	003_1000 ug CBD	12	0	8	3	0	0	6	5	10	12	16	24	9	3	11	15	7	10	15	10	30	71	15	12	0	4	22	11	24	50	32	45	24	46	54	67	85	23	50	53	23	60	23	25	32	93	54
CH208	A3.0	002_750 ug CBD	33	28	5	1	0	0	14	27	36	52	62	19	19	14	12	8	33	19	6	19	6	8	25	29	28	19	10	12	25	18	7	10	5	17	23	36	51	2	12	34	26	43	88	12	8	3	9
CH209	A3.1	002_750 ug CBD	23	9	20	10	15	32	21	29	25	18	6	7	5	11	12	4	0	6	15	12	1	1	1	2	1	1	3	0	4	6	20	12	13	9	0	12	28	41	17	7	42	3	82	35	26	6	23
CH210	A3.2	002_750 ug CBD	31	18	28	11	15	12	41	42	10	5	6	7	0	13	7	0	0	0	10	0	6	8	0	3	18	4	0	0	0	4	10	0	13	0	2	6	32	2	4	8	24	54	45	81	38	29	0
CH211	A3.3	002_750 ug CBD	16	28	18	16	19	22	20	45	12	36	14	44	0	5	13	41	24	0	27	27	10	25	117	163	43	12	48	7	12	8	40	79	33	16	5	0	32	111	70	66	70	212	67	59	138	11	6
CH214	B3.0	001_500ug CBD	27	33	41	29	27	71	42	71	71	97	117	108	49	78	78	44	74	47	3	3	2	3	18	3	8	22	78	182	90	87	23	30	35	14	2	10	64	69	50	78	45	47	78	38	127	168	83
CH215	B3.1	001_500ug CBD	30	18	26	17	6	22	41	24	23	39	10	30	24	11	29	23	51	20	47	33	0	4	0	49	25	8	19	14	36	0	0	64	27	16	9	3	0	26	80	57	109	76	64	68	4	24	8
CH216	B3.2	001_500ug CBD	52	34	16	4	2	7	23	5	17	33	63	25	25	29	8	17	9	17	22	0	17	0	4	6	12	8	5	5	3	20	9	2	13	19	5	0	10	13	43	44	141	42	49	23	72	17	34
CH217	B3.3	001_500ug CBD	101	76	122	109	67	32	47	17	34	23	41	19	33	37	54	51	27	41	26	44	10	20	31	43	29	33	14	80	63	65	69	51	26	32	26	62	54	66	99	45	101	60	50	46	55	57	36
CH220	C3.0	000_Emulsion Control	74	57	30	52	45	75	93	74	61	74	76	70	26	22	50	5	6	8	1	5	7	16	8	14	35	42	167	19	5	49	22	32	5	2	9	34	36	26	39	26	46	15	1	18	2	1	4
CH221	C3.1	000_Emulsion Control	87	41	33	62	58	80	91	116	72	63	55	38	26	16	28	17	7	2	0	1	6	17	14	9	47	51	47	31	13	5	9	3	4	0	2	10	13	44	39	36	18	17	14	4	7	0	12
CH222	C3.2	000_Emulsion Control	59	41	51	84	152	145	125	132	123	134	65	41	27	40	24	10	19	6	0	2	5	8	13	9	28	55	21	80	96	59	8	29	11	24	151	7	33	37	123	37	35	71	17	23	32	2	9
CH223	C3.3	000_Emulsion Control	32	127	154	126	163	137	125	122	104	126	158	111	145	169	230	95	246	178	37	95	69	106	27	65	38	61	37	32	13	59	10	19	3	4	7	12	44	90	142	188	174	137	53	146	100	68	53
CH224	A3.4	002_750 ug CBD	19	62	55	51	30	12	75	27	37	43	48	47	63	95	43	79	21	30	34	51	13	7	19	3	0	3	53	66	15	58	11	10	0	10	2	0	56	88	21	2	130	15	42	54	40	108	66
CH225	A3.5	002_750 ug CBD	28	9	30	36	23	14	3	12	16	35	2	20	59	27	29	41	4	5	18	7	0	0	3	11	3	1	5	20	0	64	13	11	24	44	17	5	4	11	0	24	23	11	35	95	13	39	65
CH226	A3.6	002_750 ug CBD	34	60	81	33	8	8	2	9	35	46	23	108	35	14	3	53	74	32	6	13	2	0	0	0	9	1	25	15	55	17	2	34	68	67	55	0	2	0	20	82	63	63	16	87	104	87	73
CH227	A3.7	002_750 ug CBD	31	8	8	6	8	14	6	2	5	9	5	1	2	8	9	3	15	0	4	1	0	1	0	0	0	4	13	5	7	40	27	9	5	21	17	2	10	2	8	32	35	45	62	51	45	28	45
CH228	A3.8	002_750 ug CBD	71	52	21	30	21	33	36	37	8	35	23	18	22	13	25	8	14	9	18	5	1	1	8	11	6	3	56	18	17	0	0	21	5	1	47	6	0	4	78	43	89	52	46	46	28	27	21
CH230	B3.4	001_500ug CBD	46	13	39	34	53	36	50	106	116	48	109	43	19	33	69	65	16	65	59	17	7	22	85	58	75	134	106	88	89	186	120	45	77	32	54	34	14	70	112	133	65	72	68	61	99	20	73
CH231	B3.5	001_500ug CBD	58	19	13	33	24	23	22	39	49	18	22	16	18	15	17	20	21	26	53	42	4	10	28	40	29	21	67	11	33	48	36	27	6	15	25	7	43	54	85	77	85	39	43	69	78	73	42
CH232	B3.6	001_500ug CBD	38	17	26	36	6	20	26	41	43	7	14	3	12	3	16	9	12	11	1	16	3	3	5	26	13	6	25	24	30	43	49	46	18	8	6	28	25	63	53	70	32	81	88	94	54	39	1
CH233	B3.7	001_500ug CBD	86	46	53	79	97	113	43	26	56	42	26	34	21	4	18	28	10	8	5	7	0	4	12	5	65	37	49	61	40	44	32	37	17	17	0	12	18	42	69	107	101	54	33	61	45	106	33
CH235	C3.4	000_Emulsion Control	75	29	33	37	44	59	84	99	71	55	37	53	66	34	73	45	37	8	14	42	15	32	22	61	86	84	76	62	42	10	19	6	3	1	1	21	24	45	62	70	21	37	8	1	9	4	12
CH236	C3.5	000_Emulsion Control	85	10	29	35	31	37	55	53	44	62	23	9	8	15	4	4	14	3	0	1	5	6	9	20	45	46	18	28	29	6	29	26	14	3	12	56	23	66	37	33	23	35	22	16	6	4	8
CH237	C3.6	000_Emulsion Control	69	22	65	75	56	66	57	72	35	34	49	39	23	40	38	14	15	7	17	27	48	21	30	48	36	43	41	10	23	19	3	17	10	13	13	13	36	51	36	55	43	25	30	8	11	9	14
CH238	C3.7	000_Emulsion Control	56	52	72	63	111	108	91	113	76	56	66	38	43	15	7	9	0	7	0	0	1	10	12	28	23	28	28	23	3	6	1	25	0	0	15	22	47	68	76	61	29	32	21	11	3	0	11
CH239	C3.8	000_Emulsion Control	37	86	110	136	119	116	109	81	92	67	91	60	95	78	21	17	38	5	20	12	5	16	34	47	42	46	44	26	74	33	11	21	17	24	17	30	126	160	205	155	176	149	99	101	40	43	59
CH240	A3.9	002_750 ug CBD	9	18	19	37	114	14	49	53	43	27	50	18	35	53	35	125	53	82	122	52	18	10	10	116	62	191	40	85	71	126	81	76	76	77	107	37	61	81	35	91	103	178	123	178	120	170	34
CH241	A3.10	002_750 ug CBD	28	15	21	4	4	8	9	17	38	20	32	19	59	6	6	31	64	13	20	13	11	17	1	3	2	2	11	34	37	35	40	48	51	90	55	5	64	17	59	51	92	105	102	164	84	82	128
CH242	A3.11	002_750 ug CBD	14	5	4	4	3	1	8	19	4	18	11	3	12	7	7	9	9	25	14	13	10	0	13	4	18	3	51	31	11	39	16	11	13	29	4	18	1	15	9	52	40	46	35	82	55	26	18
CH243	A3.12	002_750 ug CBD	36	25	34	13	19	3	24	21	25	18	24	18	30	65	16	17	37	28	19	40	24	24	1	12	17	12	32	41	70	146	67	41	6	20	15	23	36	2	26	86	73	51	111	112	83	61	17
CH244	A3.13	002_750 ug CBD	2	3	2	1	1	5	7	8	6	7	4	5	8	6	9	5	6	9	7	11	0	2	2	8	14	14	21	14	3	14	18	5	18	6	10	7	17	10	30	56	75	106	124	65	86	42	25
CH246	B3.8	001_500ug CBD	11	17	62	34	52	73	93	113	130	83	59	81	102	63	137	127	125	71	20	30	43	59	43	40	154	105	185	168	141	101	92	120	68	119	110	127	196	96	191	181	129	295	174	130	115	68	136
CH247	B3.9	001_500ug CBD	27	13	29	28	23	42	47	63	39	83	75	39	51	33	25	35	33	54	12	13	7	3	2	16	32	48	38	69	95	38	60	46	19	42	22	19	53	125	150	144	102	74	74	32	50	25	46
CH248	B3.10	001_500ug CBD	26	6	19	8	1	1	13	10	18	10	6	8	5	16	6	5	2	14	6	6	2	3	17	17	22	24	26	13	27	21	15	21	19	40	13	26	78	77	45	80	58	59	37	40	38	90	14
CH249	B3.11	001_500ug CBD	41	20	54	77	37	45	57	60	69	52	25	22	23	33	39	55	30	57	2	8	0	0	22	34	39	35	37	107	88	38	27	75	54	32	9	6	33	52	73	99	112	115	73	61	104	22	77
CH251	C3.9	000_Emulsion Control	39	48	36	32	60	69	81	84	81	149	68	63	30	32	41	39	8	24	7	7	13	15	19	32	72	59	57	80	26	10	16	3	1	5	70	35	55	57	54	47	77	30	40	37	1	0	6
CH252	C3.10	000_Emulsion Control	69	22	50	40	67	85	82	71	59	57	64	34	23	10	23	15	33	5	6	0	8	1	11	14	57	57	27	25	15	18	26	3	0	7	36	53	59	58	45	57	30	19	17	16	3	7	11
CH253	C3.11	000_Emulsion Control	95	25	32	56	52	62	77	85	44	72	26	37	35	6	17	5	8	0	1	0	3	12	21	31	34	35	19	7	25	20	1	3	17	1	11	21	47	40	57	95	71	14	29	12	5	8	9
CH254	C3.12	000_Emulsion Control	33	68	108	94	119	112	93	130	98	94	53	33	42	22	11	10	2	3	1	3	4	12	21	43	64	95	35	38	11	12	5	10	4	0	30	77	120	152	125	100	100	98	45	60	23	45	4
CH255	C3.13	000_Emulsion Control	63	121	189	175	132	112	123	118	98	104	114	100	64	70	43	38	24	21	21	32	20	33	48	87	101	119	126	82	127	139	73	79	29	51	89	129	225	257	251	215	256	320	290	259	168	104	100
CH257	A3.14	002_750 ug CBD	22	14	31	16	15	45	52	39	78	39	6	42	50	102	33	79	35	138	145	154	43	40	9	42	87	80	165	125	76	129	97	152	93	130	106	113	98	109	107	167	200	205	230	259	184	170	139
CH258	A3.15	002_750 ug CBD	25	10	58	35	12	21	19	42	8	49	11	8	15	16	31	62	60	68	47	47	8	11	14	19	24	155	182	178	67	94	140	84	151	64	43	85	37	60	83	95	170	201	161	189	229	168	147
CH259	A3.16	002_750 ug CBD	33	36	56	68	147	62	85	53	45	67	102	166	131	124	130	225	141	235	231	350	311	306	299	333	396	328	255	266	323	238	300	252	84	142	189	255	293	235	158	284	309	273	215	235	233	288	267
CH262	B3.12	001_500ug CBD	29	34	56	114	37	59	74	83	119	123	120	97	124	135	205	152	127	257	398	348	393	379	221	284	339	261	275	278	260	269	307	340	283	297	376	406	302	318	266	254	252	324	314	314	215	282	316
CH263	B3.13	001_500ug CBD	22	23	25	29	51	67	53	68	22	48	36	63	91	52	52	24	61	40	25	120	24	11	34	96	115	167	67	193	84	98	56	75	66	28	123	46	144	164	161	143	159	141	98	94	156	158	95
CH264	B3.14	001_500ug CBD	44	31	39	29	47	53	67	27	36	46	72	68	72	78	42	66	105	79	26	16	5	8	34	102	70	52	123	30	61	134	83	47	29	57	26	32	116	89	98	116	170	46	51	33	46	55	88
CH265	B3.15	001_500ug CBD	14	14	13	37	37	63	39	28	25	19	43	42	41	38	51	124	122	185	221	258	248	243	230	150	77	83	79	88	187	118	84	133	188	228	227	206	231	153	227	154	182	259	293	226	160	184	272
CH268	C3.14	000_Emulsion Control	123	79	93	131	116	110	106	141	112	181	100	200	183	221	48	11	36	198	97	12	30	249	57	107	65	78	47	46	43	25	35	31	278	295	209	145	115	107	128	240	225	185	72	54	179	119	71
CH269	C3.15	000_Emulsion Control	60	33	92	61	68	82	77	98	90	93	67	35	26	30	12	8	7	8	1	5	0	6	37	31	49	48	23	17	27	37	27	19	0	19	12	69	96	124	128	51	73	101	114	175	168	113	86
CH270	C3.16	000_Emulsion Control	71	114	200	182	110	138	117	109	88	82	107	75	87	79	54	52	44	24	31	61	32	46	96	98	89	105	65	74	70	111	88	64	27	53	167	214	282	223	184	148	195	134	200	95	108	96	142
CH289	A4.0	003_1000 ug CBD	4	0	1	1	0	2	2	3	4	3	7	13	8	12	7	0	5	7	1	2	0	5	1	1	2	10	4	4	1	6	0	0	0	2	0	1	0	3	8	10	2	14	7	3	5	6	12
CH290	A4.1	003_1000 ug CBD	24	16	74	10	34	40	91	68	30	34	44	77	34	50	15	49	108	23	20	34	8	20	3	9	54	66	35	51	123	139	137	61	31	0	0	0	17	5	0	0	12	38	35	7	0	0	1
CH295	B4.0	002_750 ug CBD	25	47	39	18	46	26	28	26	55	58	52	64	45	32	2	23	43	35	1	9	48	0	0	2	13	17	14	57	17	10	60	14	18	18	85	23	5	1	4	34	40	9	45	0	11	59	27
CH296	B4.1	002_750 ug CBD	114	132	72	45	26	47	25	44	53	17	20	21	25	11	14	16	2	0	0	1	0	0	4	0	7	8	7	48	0	21	69	0	0	0	26	13	5	0	3	6	35	3	6	37	2	4	2
CH301	C4.0	001_500ug CBD	38	21	21	7	14	12	16	33	31	29	7	13	12	10	2	2	8	12	4	3	1	0	0	1	3	2	2	0	0	9	3	3	28	5	2	0	0	3	13	21	48	26	33	17	6	30	11
CH302	C4.1	001_500ug CBD	19	17	15	6	25	26	9	9	9	5	10	9	5	18	40	0	3	3	2	5	0	2	0	0	12	9	6	0	7	7	14	14	5	5	7	0	0	16	2	17	19	16	46	24	3	19	27
CH304	A4.2	003_1000 ug CBD	23	27	51	50	28	11	78	35	56	50	91	62	101	79	111	148	78	18	74	267	126	18	20	31	27	83	86	61	31	100	40	25	47	63	78	56	51	29	8	11	44	19	10	10	13	8	12
CH305	A4.3	003_1000 ug CBD	24	0	11	4	14	15	68	45	70	15	18	7	46	53	18	33	12	6	12	10	7	0	1	45	6	1	30	7	60	56	55	64	3	4	0	6	17	2	0	78	13	72	41	1	14	45	18
CH306	A4.4	003_1000 ug CBD	35	18	50	40	24	41	75	33	11	38	20	33	9	7	3	5	12	5	30	1	0	1	4	3	15	11	40	25	9	4	25	2	11	12	4	15	45	43	4	17	5	32	5	39	36	0	12
CH307	A4.5	003_1000 ug CBD	37	85	77	55	57	59	78	8	35	43	6	62	39	11	12	39	81	125	30	79	52	84	189	212	5	27	68	48	22	37	67	180	37	32	4	2	0	0	11	3	9	1	4	42	20	7	3
CH310	B4.2	002_750 ug CBD	26	22	41	29	7	21	9	49	53	47	81	68	128	86	58	43	88	3	91	47	19	5	65	84	82	93	73	56	37	15	71	17	2	75	26	22	8	18	3	2	0	28	13	42	11	27	5
CH311	B4.3	002_750 ug CBD	43	34	38	13	3	49	41	72	35	41	14	38	12	12	0	20	7	15	33	3	41	8	0	3	14	8	20	34	17	30	64	26	66	22	20	33	21	14	0	9	11	32	44	40	39	32	32
CH312	B4.4	002_750 ug CBD	70	64	77	95	39	46	50	85	45	18	40	22	21	48	32	14	8	24	2	8	47	44	65	107	47	63	10	35	14	12	19	18	12	49	72	75	30	2	3	12	27	88	44	49	34	16	21
CH313	B4.5	002_750 ug CBD	100	120	92	148	124	139	104	64	122	47	92	126	16	7	25	0	52	13	55	1	6	13	0	0	24	14	16	18	38	116	136	63	72	62	27	66	172	165	199	283	275	44	47	116	74	53	96
CH316	C4.2	001_500ug CBD	45	57	47	75	29	38	46	44	61	65	29	40	32	41	16	4	14	8	32	46	0	14	26	5	11	18	70	13	33	50	28	104	30	32	29	0	0	9	2	38	51	24	49	37	96	48	15
CH317	C4.3	001_500ug CBD	27	14	23	18	11	41	27	23	12	23	8	15	32	19	7	1	22	7	1	4	1	0	0	7	8	24	5	9	17	3	0	16	17	3	0	4	0	10	24	17	40	13	61	10	41	39	6
CH318	C4.4	001_500ug CBD	35	23	8	6	1	28	29	39	26	23	29	53	32	2	42	15	8	23	9	9	0	2	1	12	10	2	19	5	33	14	27	24	5	2	2	3	5	6	32	36	70	16	32	37	25	32	23
CH319	C4.5	001_500ug CBD	21	56	58	37	17	22	47	25	80	40	42	88	76	9	5	4	3	4	3	2	0	0	0	8	20	20	78	15	45	48	43	19	14	90	21	6	5	73	38	88	72	136	100	75	53	164	25
CH320	A4.6	003_1000 ug CBD	13	54	22	13	9	16	11	13	23	28	16	13	17	52	6	9	9	6	24	10	8	0	17	6	2	2	0	60	37	28	4	19	3	30	20	6	0	0	9	48	18	18	7	0	22	29	2
CH321	A4.7	003_1000 ug CBD	17	8	6	22	0	2	9	0	7	9	4	9	4	4	0	0	1	1	5	0	2	2	0	0	1	8	25	10	0	7	24	29	23	11	13	13	32	19	14	16	22	3	3	8	6	34	16
CH322	A4.8	003_1000 ug CBD	30	20	26	18	6	0	6	9	8	14	15	8	3	9	6	5	0	11	27	18	12	27	4	0	3	21	54	38	19	41	52	52	55	39	9	50	0	26	32	22	7	49	43	7	40	65	8
CH323	A4.9	003_1000 ug CBD	32	11	30	9	3	11	35	36	48	46	0	19	13	3	3	0	4	2	9	5	14	1	23	7	0	7	0	34	41	13	35	15	6	12	49	13	49	2	4	3	2	18	6	37	8	14	53
CH324	A4.10	003_1000 ug CBD	22	36	28	27	65	53	34	29	38	15	79	76	50	40	16	67	79	49	80	7	28	33	11	59	23	6	34	49	46	53	112	37	60	57	36	19	90	116	25	30	46	16	67	80	61	65	74
CH326	B4.6	002_750 ug CBD	32	4	40	17	2	107	16	27	44	68	37	42	66	102	58	65	115	113	49	102	137	64	20	6	9	51	59	33	36	6	117	85	111	117	59	53	2	0	8	8	43	161	105	85	34	43	7
CH327	B4.7	002_750 ug CBD	49	34	26	10	2	29	20	27	20	26	41	24	13	1	28	41	0	36	65	10	3	102	15	9	16	30	38	44	1	100	30	32	2	55	19	25	23	16	29	19	11	12	25	19	9	80	54
CH328	B4.8	002_750 ug CBD	43	35	32	11	5	6	15	32	46	10	17	14	7	51	36	28	21	2	18	15	3	0	1	20	4	56	30	16	11	22	55	88	19	19	27	23	4	6	4	34	82	122	52	62	60	82	19
CH329	B4.9	002_750 ug CBD	57	43	67	43	37	115	68	52	126	108	88	87	23	33	78	44	79	18	25	9	157	101	11	12	28	21	54	17	9	24	16	99	29	21	42	36	28	6	11	26	79	73	106	111	63	99	90
CH331	C4.6	001_500ug CBD	32	57	52	66	45	41	90	170	79	121	133	121	134	102	68	52	87	32	44	24	79	26	55	24	30	93	37	72	202	9	29	59	124	177	97	109	12	38	82	160	79	120	133	102	52	85	62
CH332	C4.7	001_500ug CBD	42	13	10	28	20	26	47	64	102	108	56	48	49	72	102	91	49	57	104	51	7	7	21	38	4	23	14	79	29	71	8	35	18	53	33	30	0	22	11	53	120	93	89	64	34	50	66
CH333	C4.8	001_500ug CBD	22	9	12	2	25	22	42	33	39	29	22	7	13	2	9	11	30	9	26	12	0	0	10	5	7	2	12	2	14	21	15	11	21	18	4	16	1	4	20	33	78	81	25	39	52	44	12
CH334	C4.9	001_500ug CBD	40	32	27	26	18	12	46	90	28	31	46	17	19	23	14	36	32	19	17	60	7	18	2	6	14	14	33	50	9	51	48	6	61	50	8	9	3	7	27	36	88	66	60	88	49	106	43
CH335	C4.10	001_500ug CBD	19	25	30	31	28	46	79	45	34	59	41	15	12	9	16	48	56	30	21	12	1	3	15	10	12	39	53	64	26	24	10	26	37	32	55	44	11	45	35	45	82	102	130	58	27	22	130
CH336	A4.11	003_1000 ug CBD	6	51	21	29	6	2	30	27	4	2	13	2	14	0	37	9	15	0	3	0	0	0	0	1	1	0	0	0	57	2	34	66	6	15	0	15	33	41	9	43	28	30	2	34	46	3	20
CH337	A4.12	003_1000 ug CBD	15	29	27	3	0	0	10	4	0	16	16	36	2	0	1	5	1	0	3	0	0	0	4	0	13	1	4	37	19	30	36	41	8	32	47	18	9	37	23	11	12	3	4	20	66	22	52
CH338	A4.13	003_1000 ug CBD	21	6	9	19	0	0	7	2	19	7	14	3	23	5	18	5	18	2	59	13	11	93	9	4	44	14	14	18	8	40	62	60	45	51	24	111	0	53	77	12	16	26	31	82	83	107	125
CH339	A4.14	003_1000 ug CBD	41	24	43	25	3	20	42	35	44	28	74	21	19	8	35	46	81	86	50	26	58	18	16	17	7	7	27	32	27	103	58	73	80	43	57	77	47	42	70	21	69	72	84	62	131	129	262
CH342	B4.10	002_750 ug CBD	13	5	56	3	0	7	41	60	67	22	58	76	108	104	60	71	111	97	201	91	291	184	148	43	49	38	23	42	98	60	2	144	93	89	119	65	25	96	62	13	34	87	120	70	47	50	60
CH343	B4.11	002_750 ug CBD	5	6	10	4	4	1	5	14	1	5	1	14	12	18	25	10	22	11	25	35	22	8	6	7	77	13	28	27	19	88	60	21	42	86	63	83	60	50	20	24	84	34	151	35	43	65	48
CH344	B4.12	002_750 ug CBD	27	12	27	8	20	14	31	37	12	58	10	9	20	23	19	25	4	12	28	5	14	14	4	5	11	13	152	121	44	85	63	20	48	76	75	53	23	54	47	9	72	136	151	133	128	118	117
CH345	B4.13	002_750 ug CBD	31	17	79	34	27	46	45	72	75	54	42	12	60	58	68	46	74	118	55	86	30	75	29	60	25	57	37	44	110	81	62	126	156	70	124	102	215	43	9	54	87	150	98	150	81	114	143
CH348	C4.11	001_500ug CBD	19	11	15	15	13	24	26	60	74	40	51	62	66	32	43	19	48	51	23	23	2	11	13	11	38	81	59	46	49	36	93	53	84	75	39	51	21	32	21	88	111	85	50	21	85	71	39
CH349	C4.12	001_500ug CBD	18	14	19	52	48	9	40	41	47	60	56	65	37	61	9	15	35	5	63	24	11	18	0	5	53	35	61	43	35	127	103	50	71	54	56	41	19	9	37	109	63	134	101	78	123	76	18
CH350	C4.13	001_500ug CBD	13	34	54	20	6	32	76	100	23	20	60	46	19	8	45	62	72	11	56	22	8	4	3	3	19	70	29	68	98	39	69	84	82	50	52	53	17	82	80	93	79	151	90	41	118	85	86
CH351	C4.14	001_500ug CBD	16	16	21	19	12	42	41	81	52	77	22	89	41	57	71	53	54	8	17	46	0	4	3	9	26	146	133	106	161	98	71	109	61	91	72	50	107	78	136	166	162	144	142	147	140	171	120
CH353	A4.15	003_1000 ug CBD	22	32	32	23	6	49	10	8	15	19	23	19	25	22	35	17	6	4	21	121	14	9	13	13	11	9	21	9	177	87	92	71	30	58	108	84	52	141	64	55	55	65	15	88	70	114	119
CH354	A4.16	003_1000 ug CBD	34	18	35	26	69	17	18	19	11	14	12	12	24	27	69	50	35	9	7	14	92	61	47	34	13	32	38	48	96	224	118	169	113	165	49	284	211	256	256	137	137	129	93	98	125	173	174
CH359	B4.14	002_750 ug CBD	16	47	9	2	4	30	21	38	8	30	15	15	50	34	60	37	39	75	76	17	61	42	1	8	52	67	108	57	131	166	109	129	183	100	177	135	57	169	38	30	139	187	266	158	170	111	177
CH360	B4.15	002_750 ug CBD	35	21	20	48	3	12	32	66	43	21	43	8	48	38	65	50	47	26	65	86	39	18	9	22	38	89	125	120	218	153	220	197	114	194	142	160	144	61	154	135	118	172	248	221	214	217	292
CH365	C4.15	001_500ug CBD	40	39	26	51	7	11	42	79	18	56	50	28	61	64	37	27	47	59	94	63	21	14	8	56	75	116	172	217	130	140	70	94	87	76	69	82	33	65	137	117	191	186	143	146	209	173	117
CH366	C4.16	001_500ug CBD	3	7	25	9	3	46	49	32	37	50	183	56	13	57	136	73	71	136	161	208	158	234	55	64	105	136	266	188	161	272	201	146	156	119	152	217	302	351	271	279	274	223	297	190	161	206	247
[truncated: 25 more columns]

## Sheet: CBD ex2 tL
DATE:	2023-06-09 12:18:37
FILE:	C:\Software\WMicrotracker One\wmicrotracker_w8_v30api\wmicrotracker\wmicrotracker\p00025\20230606_1140
SUBPROJECT:	2023 0609 wDAT CBD 300-400ug tL
<<<<<< Group Activity: Average Activity Counts per Data Interval>>>>>>
Group/Time[m]	30	60	90	120	150	180	210	240	270	300	330	360	390	420	450	480	510	540	570	600	630	660	690	720	750	780	810	840	870	900	930	960	990	1020	1050	1080	1110	1140	1170	1200	1230	1260	1290	1320	1350	1380	1410	1440	1470
000_Emulsion Control tL	68	70	82	83	90	94	97	97	98	102	100	98	98	98	95	94	93	84	82	81	80	78	71	66	59	60	59	55	52	47	41	43	36	33	31	35	31	27	23	20	22	27	27	36	45	53	60	67	73
001_Tween	66	67	76	78	82	88	91	93	95	100	100	100	100	96	92	95	87	82	82	73	70	68	61	61	52	49	55	47	40	41	44	47	36	32	29	32	29	16	16	14	20	24	30	38	46	55	63	75	79
002_300ug CBD	55	39	41	42	42	46	45	51	50	56	63	54	61	60	59	61	57	56	54	51	53	54	47	46	47	46	48	42	45	49	51	46	41	39	44	45	48	32	29	30	24	18	16	20	22	33	40	45	49
003_400ug CBD	55	31	39	39	44	39	39	37	39	45	41	50	54	53	54	58	53	53	55	57	49	50	46	52	49	50	52	50	44	45	53	51	44	46	43	47	48	45	34	31	33	29	23	25	25	32	31	40	43
Time	1	1.5	2	2.5	3	3.5	4	4.5	5	5.5	6	6.5	7	7.5	8	8.5	9	9.5	10	10.5	11	11.5	12	12.5	13	13.5	14	14.5	15	15.5	16	16.5	17	17.5	18	18.5	19	19.5	20	20.5	21	21.5	22	22.5	23	23.5	24	24.5	25
<<<<<< Group Activity: Standard Error >>>>>>
Group/Time[m]	30	60	90	120	150	180	210	240	270	300	330	360	390	420	450	480	510	540	570	600	630	660	690	720	750	780	810	840	870	900	930	960	990	1020	1050	1080	1110	1140	1170	1200	1230	1260	1290	1320	1350	1380	1410	1440	1470
000_Emulsion Control tL	5.8	8.1	5.8	6.9	5.2	4.6	4.6	5.8	4	3.5	5.2	2.3	2.9	1.7	4	5.2	2.9	4.6	4	7.5	6.4	9.2	6.9	8.1	8.7	4.6	6.4	7.5	8.7	2.9	5.2	5.8	2.9	6.4	3.5	5.2	7.5	5.8	4	2.3	2.3	7.5	7.5	8.7	4.6	6.4	5.2	5.2	4.6
001_Tween	4.6	5.8	6.4	6.4	5.8	6.9	5.8	9.2	8.1	6.4	7.5	5.2	5.8	6.4	4	6.9	5.2	6.4	6.4	5.8	4.6	2.9	4	4	1.2	0.6	4.6	1.7	2.3	2.3	7.5	11	5.8	4	2.3	2.9	2.3	3.5	5.8	4.6	4.6	5.2	6.9	6.4	5.8	8.1	7.5	11.5	8.7
002_300ug CBD	1.2	2.9	2.9	1.7	3.5	1.7	2.3	1.2	1.2	1.7	2.3	1.7	2.3	3.5	4	2.9	1.2	2.3	1.7	1.7	4.6	1.2	5.2	2.3	3.5	2.9	6.9	5.2	2.3	2.9	4	4	2.3	5.2	1.7	4	7.5	1.7	2.3	0.6	2.3	5.2	2.9	1.7	4	4.6	8.7	7.5	6.9
003_400ug CBD	6.4	3.5	2.3	1.7	5.8	7.5	6.4	5.2	1.7	3.5	1.7	3.5	2.9	4.6	5.2	6.4	4.6	5.2	6.9	5.8	6.9	6.9	8.1	8.1	4	4.6	8.1	1.7	1.7	5.8	6.9	8.1	1.7	4	1.2	3.5	2.9	2.9	2.9	2.9	7.5	4	1.7	2.9	1.2	1.7	4	7.5	7.5
<<<<<< Group Activity: Number of wells/group >>>>>>
Group/Time[m]	30	60	90	120	150	180	210	240	270	300	330	360	390	420	450	480	510	540	570	600	630	660	690	720	750	780	810	840	870	900	930	960	990	1020	1050	1080	1110	1140	1170	1200	1230	1260	1290	1320	1350	1380	1410	1440	1470
000_Emulsion Control tL	3	3	3	3	3	3	3	3	3	3	3	3	3	3	3	3	3	3	3	3	3	3	3	3	3	3	3	3	3	3	3	3	3	3	3	3	3	3	3	3	3	3	3	3	3	3	3	3	3
001_Tween	3	3	3	3	3	3	3	3	3	3	3	3	3	3	3	3	3	3	3	3	3	3	3	3	3	3	3	3	3	3	3	3	3	3	3	3	3	3	3	3	3	3	3	3	3	3	3	3	3
002_300ug CBD	3	3	3	3	3	3	3	3	3	3	3	3	3	3	3	3	3	3	3	3	3	3	3	3	3	3	3	3	3	3	3	3	3	3	3	3	3	3	3	3	3	3	3	3	3	3	3	3	3
003_400ug CBD	3	3	3	3	3	3	3	3	3	3	3	3	3	3	3	3	3	3	3	3	3	3	3	3	3	3	3	3	3	3	3	3	3	3	3	3	3	3	3	3	3	3	3	3	3	3	3	3	3
<<<<<< Number of Samples per Acquisition Interval [1unit=500values] >>>>>>
Time[m]	30	60	90	120	150	180	210	240	270	300	330	360	390	420	450	480	510	540	570	600	630	660	690	720	750	780	810	840	870	900	930	960	990	1020	1050	1080	1110	1140	1170	1200	1230	1260	1290	1320	1350	1380	1410	1440	1470
#Samples	30	30	30	30	30	30	30	30	30	30	30	30	30	30	30	30	30	30	30	30	30	30	30	30	30	30	30	30	30	30	30	30	30	30	30	30	30	30	30	30	30	30	30	30	30	30	30	30	30
<<<<<< Average Temperature [°C] >>>>>>
Time[m]	30	60	90	120	150	180	210	240	270	300	330	360	390	420	450	480	510	540	570	600	630	660	690	720	750	780	810	840	870	900	930	960	990	1020	1050	1080	1110	1140	1170	1200	1230	1260	1290	1320	1350	1380	1410	1440	1470
Temp[°C]	22.3	22.6	22.6	22.6	22.6	22.6	22.6	22.6	22.8	22.8	22.8	22.8	22.8	22.8	22.8	22.8	22.8	22.8	22.8	22.8	22.8	22.8	22.8	22.8	22.8	22.8	22.8	22.8	22.8	22.8	22.8	22.8	22.8	22.8	22.8	22.8	22.8	22.8	22.8	22.8	22.8	22.8	22.8	22.8	22.8	22.8	22.8	22.8	22.8
<<<<<< Well Activity >>>>>>
Well	Group/Time[m]	30	60	90	120	150	180	210	240	270	300	330	360	390	420	450	480	510	540	570	600	630	660	690	720	750	780	810	840	870	900	930	960	990	1020	1050	1080	1110	1140	1170	1200	1230	1260	1290	1320	1350	1380	1410	1440
A1	003_400ug CBD	44	24	37	38	37	27	34	37	36	43	42	46	50	45	47	46	44	43	44	46	35	37	31	40	41	43	40	46	44	34	43	37	44	40	44	46	45	40	39	26	21	24	22	31	23	29	39	51
B1	002_300ug CBD	54	33	36	40	44	42	41	50	50	55	60	54	58	63	65	56	55	59	54	50	57	54	42	42	43	43	37	35	41	43	43	38	36	31	47	44	42	33	25	31	25	12	14	22	22	34	50	56
C1	001_Tween	58	57	64	69	73	77	81	77	83	89	87	92	91	84	85	84	78	75	69	63	62	64	53	55	49	49	46	44	36	38	34	30	27	26	26	28	25	14	11	10	12	15	20	35	43	46	55	61
A2	000_Emulsion Control tL	60	56	71	72	84	86	95	97	96	97	96	95	92	96	88	85	91	76	74	66	68	61	58	50	42	51	48	41	35	43	32	37	31	23	24	24	16	16	16	20	22	31	38	45	51	63	68	71
B2	003_400ug CBD	56	35	36	37	39	37	31	28	41	41	38	57	53	55	50	64	58	58	52	58	56	51	49	50	55	47	48	52	41	52	66	64	42	44	41	42	46	50	29	30	33	27	21	24	26	35	29	43
C2	002_300ug CBD	57	42	41	45	35	48	46	53	49	59	67	57	65	64	61	63	59	57	57	54	59	56	57	49	54	43	47	40	46	52	55	49	44	48	41	39	40	29	30	31	27	28	22	21	15	24	23	31
A3	001_Tween	66	66	84	90	93	101	101	109	111	110	112	110	110	106	99	108	96	94	89	82	78	74	63	61	53	50	59	50	40	40	39	43	47	39	33	38	32	23	28	23	27	33	44	50	57	72	78	97
B3	000_Emulsion Control tL	80	84	89	96	100	102	106	106	105	109	110	103	102	102	101	103	99	92	86	91	90	93	81	74	71	66	70	57	60	52	50	54	41	44	35	42	41	35	30	24	26	38	30	45	49	56	62	73
C3	003_400ug CBD	66	34	43	43	55	52	52	45	39	52	44	48	59	60	64	65	57	59	68	66	55	61	58	67	50	59	68	52	46	49	50	52	47	54	45	53	54	44	35	36	46	37	27	21	27	32	25	26
A4	002_300ug CBD	54	41	45	40	47	47	48	50	52	53	62	52	59	53	52	65	57	52	52	49	44	52	41	48	44	52	61	52	48	52	55	50	42	38	43	52	63	35	32	29	20	13	13	16	29	40	46	49
B4	001_Tween	74	77	80	76	81	86	92	93	91	100	100	98	99	98	92	92	87	76	88	74	71	66	66	68	53	48	59	48	43	46	59	67	34	30	28	30	30	11	9	10	20	24	27	29	38	48	57	66
C4	000_Emulsion Control tL	65	70	86	82	85	95	90	87	92	100	94	97	100	96	95	95	89	84	86	86	82	81	74	73	63	64	60	66	61	47	41	37	37	31	35	38	35	30	22	17	18	12	12	19	36	41	50	57
<<<<<< Channel Activity >>>>>>
Channel	Well	Group/Time[m]	30	60	90	120	150	180	210	240	270	300	330	360	390	420	450	480	510	540	570	600	630	660	690	720	750	780	810	840	870	900	930	960	990	1020	1050	1080	1110	1140	1170	1200	1230	1260	1290	1320	1350	1380	1410
CH17	A1.0	003_400ug CBD	24	0	0	0	0	0	0	0	0	0	0	0	0	0	0	0	0	0	0	0	0	0	0	0	19	24	59	39	41	34	70	94	133	62	92	156	160	39	41	4	2	11	1	18	5	4	17
CH18	A1.1	003_400ug CBD	31	5	38	52	18	12	22	18	19	23	3	7	9	9	8	41	23	7	6	6	6	0	1	9	7	24	15	14	11	23	9	2	23	8	54	16	0	18	1	1	6	1	2	1	0	4	14
CH23	B1.0	002_300ug CBD	35	0	0	0	0	0	0	1	0	0	0	0	0	0	0	0	0	0	0	0	0	0	0	0	0	0	0	0	0	0	0	0	0	0	0	0	0	0	0	0	0	0	0	0	0	0	0
CH24	B1.1	002_300ug CBD	30	46	22	44	6	26	37	19	32	23	24	16	20	21	67	37	29	12	57	17	27	44	15	24	43	68	39	25	38	20	20	14	13	6	11	14	26	0	61	12	1	1	13	11	6	1	22
CH29	C1.0	001_Tween	49	49	55	38	47	65	69	49	62	70	75	60	83	64	62	57	60	44	41	53	39	48	58	53	66	35	59	40	15	21	10	5	3	6	3	15	23	5	6	3	2	14	4	15	48	44	53
CH30	C1.1	001_Tween	30	32	39	76	86	79	71	75	71	68	86	66	83	76	85	72	63	76	55	43	68	36	23	50	22	35	38	24	19	36	20	20	5	17	19	71	118	30	6	1	2	8	20	91	42	25	6
CH32	A1.2	003_400ug CBD	47	27	14	38	80	36	22	16	5	35	23	56	34	26	55	52	53	42	54	50	68	81	45	23	54	45	38	28	28	18	61	2	17	56	95	34	5	2	0	0	0	0	0	14	16	16	32
CH33	A1.3	003_400ug CBD	50	22	30	21	19	13	14	20	10	24	23	16	33	32	36	21	34	37	9	26	25	16	21	29	9	9	21	17	4	0	29	9	26	8	7	0	3	16	0	0	17	0	0	0	4	0	2
CH34	A1.4	003_400ug CBD	65	28	37	54	6	17	45	42	30	10	18	24	9	19	42	43	27	27	26	31	45	11	11	11	12	38	15	28	9	13	31	16	4	5	15	4	7	7	16	50	44	13	19	129	32	24	33
CH35	A1.5	003_400ug CBD	59	6	29	37	29	15	48	65	84	74	49	28	43	56	43	16	19	22	45	12	7	8	8	8	9	4	13	24	27	44	12	26	33	10	7	35	3	35	6	0	0	8	0	3	0	18	6
CH38	B1.2	002_300ug CBD	27	42	23	70	61	41	25	34	18	14	61	49	62	80	85	69	78	84	67	80	131	58	30	45	57	54	33	21	46	56	12	9	12	17	11	3	0	0	2	1	2	1	0	7	0	7	6
CH39	B1.3	002_300ug CBD	45	6	5	4	9	13	6	37	15	8	33	34	44	64	52	53	47	51	28	56	29	17	17	44	10	24	13	8	13	21	13	24	31	17	23	6	0	2	7	3	0	0	0	5	3	10	26
CH40	B1.4	002_300ug CBD	30	32	17	26	6	5	23	30	32	21	46	50	47	23	31	22	61	32	53	50	54	34	54	14	57	19	24	17	14	13	32	53	48	13	4	5	9	0	12	2	0	5	0	3	8	6	7
CH41	B1.5	002_300ug CBD	82	22	62	20	33	34	27	39	28	63	77	33	33	41	40	21	31	49	72	46	33	58	27	55	12	16	4	15	20	47	17	44	36	91	46	13	8	0	25	71	0	9	36	29	7	11	45
CH44	C1.2	001_Tween	65	49	55	41	47	28	35	41	30	30	96	109	96	85	95	99	80	90	71	46	60	52	36	75	43	44	8	12	6	7	5	6	2	1	2	4	3	0	1	1	2	1	2	5	3	6	16
CH45	C1.3	001_Tween	52	41	28	28	36	59	67	81	69	85	109	76	106	94	88	103	77	54	67	53	42	50	43	48	26	25	16	17	12	6	18	12	8	8	4	7	3	0	0	0	0	0	0	7	7	4	20
CH46	C1.4	001_Tween	48	70	42	80	57	98	101	91	107	127	110	107	98	101	110	77	107	92	80	83	70	47	56	50	27	27	22	35	13	30	8	3	5	7	19	0	2	2	0	0	1	0	0	3	12	24	13
CH47	C1.5	001_Tween	40	38	78	124	94	110	108	82	93	90	83	97	78	83	65	80	79	66	43	64	51	73	58	46	41	73	55	33	23	26	14	29	4	11	4	17	22	4	5	7	4	10	1	11	4	22	19
CH48	A1.6	003_400ug CBD	17	48	71	27	47	48	19	33	24	28	31	38	49	83	60	45	60	77	47	29	29	59	13	29	59	69	14	5	10	2	10	12	30	0	0	9	6	18	0	1	0	1	0	14	3	8	3
CH49	A1.7	003_400ug CBD	33	6	84	69	35	9	9	40	15	41	41	39	41	23	36	22	28	10	21	35	9	13	5	15	10	5	2	22	1	8	3	4	1	3	2	11	3	8	6	0	0	2	0	0	0	12	3
CH50	A1.8	003_400ug CBD	37	35	39	33	28	17	4	20	13	4	36	17	26	27	48	22	39	25	33	77	20	24	7	32	13	10	3	31	69	29	13	6	2	7	0	11	4	7	1	0	0	0	8	0	4	0	14
CH51	A1.9	003_400ug CBD	45	31	29	36	64	39	16	38	51	75	55	60	55	50	35	21	37	52	39	29	16	24	13	36	24	7	11	4	17	20	14	5	19	54	28	11	9	19	19	16	0	26	27	4	15	4	14
CH52	A1.10	003_400ug CBD	99	65	82	54	82	44	58	57	86	94	87	94	86	41	44	54	52	73	29	32	11	29	39	54	69	85	53	79	82	58	53	78	40	70	84	12	18	28	169	34	10	10	14	12	12	20	17
CH54	B1.6	002_300ug CBD	80	18	47	15	73	45	14	23	75	47	58	97	118	115	139	117	129	133	102	104	102	92	57	75	97	118	41	25	59	65	60	51	75	35	75	12	81	113	2	3	3	0	0	8	10	14	7
CH55	B1.7	002_300ug CBD	61	47	25	37	60	43	29	45	28	66	58	45	45	85	97	74	46	62	67	43	64	41	58	42	33	52	29	16	46	23	27	24	38	23	28	22	3	33	6	9	23	10	19	6	12	18	48
CH56	B1.8	002_300ug CBD	45	27	18	25	31	49	22	32	25	64	47	24	37	53	43	44	48	54	53	18	23	20	33	31	34	19	39	13	28	19	36	38	12	7	25	30	9	9	2	3	0	3	0	8	1	20	12
CH57	B1.9	002_300ug CBD	46	13	20	17	32	18	42	42	54	55	35	40	25	50	36	33	35	39	11	37	20	28	18	24	41	19	18	26	19	15	18	20	25	11	12	12	19	3	0	0	0	2	2	0	5	13	23
CH59	C1.6	001_Tween	59	73	17	0	0	0	0	0	0	0	0	0	0	0	0	0	0	0	0	0	0	0	0	0	0	0	0	0	0	0	0	0	0	0	0	0	0	0	0	0	0	0	0	0	0	0	0
CH60	C1.7	001_Tween	82	46	53	24	47	65	70	79	101	104	104	106	102	116	108	90	102	72	96	82	55	86	71	38	44	15	31	14	12	13	14	3	6	8	5	13	10	0	0	0	0	2	1	5	10	12	22
CH61	C1.8	001_Tween	66	44	48	32	68	67	72	84	80	103	92	101	102	82	84	99	97	61	62	39	29	60	37	24	52	27	23	16	4	16	8	0	6	4	6	3	2	0	1	0	1	1	0	4	20	4	30
CH62	C1.9	001_Tween	44	49	66	81	87	91	116	100	123	126	122	115	125	99	114	102	82	92	58	67	52	48	37	47	23	48	31	33	10	16	12	14	3	2	1	2	11	2	0	0	0	0	0	7	12	16	21
CH63	C1.10	001_Tween	44	41	118	140	121	138	132	125	131	144	97	131	131	105	124	104	114	115	115	102	100	92	90	88	87	75	54	67	67	57	37	51	12	7	16	12	2	0	0	1	0	0	1	19	26	33	60
CH64	A1.11	003_400ug CBD	15	24	35	14	47	61	61	61	13	43	62	66	92	96	65	67	65	67	75	105	81	113	105	83	75	59	63	83	67	77	65	79	64	54	50	47	88	108	49	55	12	0	16	9	8	20	40
CH65	A1.12	003_400ug CBD	41	12	38	38	26	24	32	41	58	35	29	58	80	84	79	93	63	107	101	81	61	68	71	102	138	106	125	158	84	52	74	78	165	101	41	53	61	156	123	13	8	13	4	3	6	21	62
CH66	A1.13	003_400ug CBD	53	19	18	60	52	20	42	47	59	63	74	82	82	72	61	77	78	54	69	72	49	11	42	32	24	65	19	52	72	35	50	53	26	31	33	61	64	12	6	1	6	32	13	8	16	15	54
CH67	A1.14	003_400ug CBD	63	41	65	71	44	47	104	47	38	61	53	69	66	47	37	78	65	30	27	47	41	43	12	56	21	21	71	40	33	31	23	23	21	43	32	56	133	9	18	31	53	58	29	13	7	25	20
CH70	B1.10	002_300ug CBD	50	37	66	36	37	38	69	70	38	81	88	89	107	106	73	95	77	99	96	88	94	107	129	89	94	99	133	142	160	139	147	126	110	98	151	147	166	145	154	210	201	16	47	139	86	83	128
CH71	B1.11	002_300ug CBD	78	31	52	53	41	40	59	69	78	53	71	73	87	97	102	83	65	62	57	74	69	59	44	43	29	56	61	95	40	58	40	50	34	24	11	46	48	32	44	100	85	16	6	17	3	28	22
CH72	B1.12	002_300ug CBD	84	74	42	65	68	39	80	99	102	104	89	95	73	61	60	80	54	52	42	43	98	71	54	38	46	40	34	46	36	46	46	32	37	20	49	37	21	11	0	8	0	1	7	6	14	26	27
CH73	B1.13	002_300ug CBD	72	37	56	72	55	66	56	81	89	86	104	77	76	63	65	41	65	84	65	49	62	103	49	71	66	24	73	88	83	104	148	77	44	50	36	15	33	8	5	1	12	1	0	15	39	78	124
CH76	C1.11	001_Tween	95	82	21	1	0	0	0	2	0	0	0	0	0	0	0	0	0	0	0	0	0	0	0	0	0	0	0	0	0	0	0	0	0	0	0	0	0	0	0	0	0	0	0	0	0	0	0
CH77	C1.12	001_Tween	65	73	81	63	84	98	113	101	109	101	115	134	107	102	88	116	95	98	64	90	90	83	72	45	42	34	50	36	26	41	18	12	7	4	3	6	7	7	0	0	0	0	4	19	18	19	37
CH78	C1.13	001_Tween	58	49	92	111	129	101	118	104	107	109	113	146	108	113	110	94	100	95	83	46	61	67	43	56	54	71	47	33	33	13	37	11	15	23	4	5	1	0	0	0	0	0	4	7	31	43	57
CH79	C1.14	001_Tween	53	62	110	137	138	139	137	135	134	136	112	133	116	119	122	127	109	129	125	115	136	138	120	145	111	134	153	177	137	141	164	196	168	141	116	71	30	18	18	8	21	44	78	133	173	199	218
CH81	A1.15	003_400ug CBD	22	16	5	18	28	37	28	28	51	65	52	78	85	39	84	79	68	56	95	87	69	54	79	109	96	83	64	83	122	74	157	95	83	104	124	159	146	164	169	152	113	148	150	179	179	206	203
CH82	A1.16	003_400ug CBD	43	23	19	31	21	17	46	57	64	49	70	51	52	67	67	44	45	46	80	59	62	73	59	49	56	81	99	78	65	66	63	39	66	69	84	104	63	41	44	87	83	78	93	123	84	97	129
CH87	B1.14	002_300ug CBD	28	32	41	62	84	90	57	63	77	108	94	74	78	69	103	64	36	64	18	42	44	34	56	55	21	46	6	4	8	4	2	4	0	7	161	217	86	73	10	0	6	4	10	8	25	74	96
CH88	B1.15	002_300ug CBD	72	70	75	101	102	117	114	110	106	90	82	71	70	87	44	68	77	72	69	51	67	94	37	21	47	38	45	19	46	54	72	42	61	84	108	132	163	92	64	76	62	123	81	97	133	157	208
CH93	C1.15	001_Tween	82	104	93	87	91	91	87	82	100	110	106	100	96	113	108	108	91	97	108	105	109	115	85	95	89	99	107	106	141	131	90	53	85	72	86	84	43	24	11	20	19	25	30	39	74	104	111
CH94	C1.16	001_Tween	51	74	90	102	110	78	84	86	95	104	62	87	113	78	77	92	75	90	105	77	96	86	73	82	105	86	85	111	89	85	115	96	123	133	147	168	143	151	146	124	144	157	194	231	250	224	245
CH113	A2.0	000_Emulsion Control tL	48	0	0	0	0	0	0	2	0	0	0	0	0	0	0	0	0	0	0	0	0	0	0	0	1	0	0	0	0	0	0	0	0	0	0	0	0	0	0	0	0	0	0	0	0	0	0
CH114	A2.1	000_Emulsion Control tL	46	40	63	47	58	91	105	102	109	123	110	99	98	128	107	89	88	77	78	76	87	31	30	40	27	24	46	28	49	188	56	103	0	4	0	57	0	0	2	0	1	3	3	3	14	14	20
CH115	A2.2	000_Emulsion Control tL	65	31	47	44	63	71	77	54	56	54	40	48	44	42	35	57	83	63	63	75	46	45	34	47	41	36	68	49	44	18	13	36	10	13	9	23	23	0	11	10	6	10	14	12	32	25	46
CH118	B2.0	003_400ug CBD	17	31	29	39	40	29	37	28	27	39	37	53	97	87	83	120	107	119	98	120	126	50	86	75	70	96	62	41	58	28	32	20	19	19	57	19	19	41	13	14	11	6	8	6	3	16	6
CH119	B2.1	003_400ug CBD	54	66	19	28	37	25	19	12	19	2	13	45	14	28	27	50	18	40	44	43	38	7	42	24	13	66	85	53	31	74	24	14	6	9	33	15	17	21	3	6	3	10	7	0	3	4	16
CH120	B2.2	003_400ug CBD	51	12	48	45	32	32	28	11	33	19	12	42	29	23	20	16	20	9	40	39	44	26	25	66	81	41	27	12	11	6	74	53	10	44	13	22	17	35	2	3	1	2	0	0	0	9	8
CH121	B2.3	003_400ug CBD	64	59	53	57	76	91	45	19	50	15	37	48	26	51	35	25	15	25	50	18	50	40	45	33	13	14	28	24	2	44	51	17	10	22	23	38	81	14	3	4	14	53	45	86	54	26	5
CH124	C2.0	002_300ug CBD	24	1	0	0	0	0	0	0	0	0	0	0	0	0	0	0	0	0	0	0	0	0	0	0	0	0	0	0	0	0	0	0	0	0	0	0	0	0	0	0	0	0	0	0	0	0	0
CH125	C2.1	002_300ug CBD	71	42	21	28	8	13	17	19	15	19	22	18	39	47	45	52	52	56	46	50	48	13	67	53	41	42	23	23	66	36	80	40	3	6	9	20	12	0	3	2	1	1	0	0	2	22	8
CH126	C2.2	002_300ug CBD	23	29	55	52	10	12	30	45	22	30	28	26	38	38	30	58	62	53	50	48	45	31	38	33	29	8	34	12	19	54	107	39	19	23	38	20	45	4	1	6	1	9	13	60	4	3	19
CH128	A2.3	000_Emulsion Control tL	56	55	63	87	89	80	115	77	70	75	102	92	103	86	80	83	44	76	59	56	56	31	29	45	17	36	55	55	18	19	12	8	7	2	5	21	16	1	5	9	9	11	7	7	36	28	59
CH129	A2.4	000_Emulsion Control tL	70	26	45	49	66	79	88	101	86	114	112	138	127	126	108	113	120	107	94	60	55	73	33	32	14	47	15	21	14	36	7	12	9	1	0	2	0	2	0	0	0	1	2	10	10	23	25
CH130	A2.5	000_Emulsion Control tL	60	44	56	58	67	57	83	100	84	107	98	91	97	94	101	108	137	83	100	82	92	73	108	94	59	70	83	59	50	52	19	11	10	5	2	0	0	0	2	0	0	4	12	7	13	29	24
CH131	A2.6	000_Emulsion Control tL	67	75	111	98	125	116	123	135	153	115	102	112	104	120	120	98	90	81	107	76	84	59	55	48	52	17	38	11	12	16	7	6	10	3	2	1	2	3	5	4	17	16	20	25	47	57	64
CH132	A2.7	000_Emulsion Control tL	19	63	69	70	63	48	48	52	59	42	51	40	49	52	35	36	42	43	39	31	48	51	42	18	12	29	43	60	13	19	8	12	121	97	30	38	14	19	8	16	15	41	29	44	79	75	71
CH134	B2.4	003_400ug CBD	41	38	35	31	47	34	59	25	67	59	7	40	67	62	68	97	95	117	98	81	83	117	89	92	89	22	63	71	19	62	142	148	48	16	18	19	13	39	7	4	0	1	12	0	4	2	5
CH135	B2.5	003_400ug CBD	18	24	13	31	20	28	16	18	15	15	17	40	35	35	26	31	26	38	28	28	15	52	21	51	14	42	41	55	29	15	42	19	23	30	14	37	14	28	11	8	7	4	3	16	0	9	2
CH136	B2.6	003_400ug CBD	92	28	29	23	31	26	11	28	21	16	16	21	43	32	62	27	24	27	29	36	20	13	28	34	23	34	39	11	38	51	24	27	47	29	28	29	21	24	21	15	1	2	31	51	3	14	3
CH137	B2.7	003_400ug CBD	60	19	28	43	46	24	35	36	41	57	37	62	45	30	40	38	44	27	25	21	30	13	29	36	26	20	6	40	10	30	52	33	19	10	14	15	15	0	7	0	0	1	0	0	0	41	24
CH139	C2.3	002_300ug CBD	89	98	79	73	55	96	68	78	67	53	82	100	83	106	123	131	76	47	86	84	139	148	109	73	109	129	91	19	70	52	19	28	32	34	32	22	26	7	9	0	35	0	0	0	1	15	0
CH140	C2.4	002_300ug CBD	69	49	46	34	44	56	47	31	50	50	60	46	80	92	78	88	78	92	58	88	64	70	62	63	52	76	30	51	65	73	45	48	43	37	66	48	7	2	4	8	0	0	0	10	3	4	10
CH141	C2.5	002_300ug CBD	48	46	42	43	22	45	22	37	31	75	35	37	32	48	56	62	30	44	58	43	54	55	27	41	34	23	68	31	40	15	24	29	26	27	5	19	54	74	36	2	1	4	7	1	0	0	8
CH142	C2.6	002_300ug CBD	40	9	43	28	14	27	8	30	30	37	45	38	58	24	24	43	64	37	53	25	22	51	36	19	25	33	45	18	43	18	19	15	21	31	4	7	29	10	15	11	0	3	6	8	5	5	8
CH143	C2.7	002_300ug CBD	68	71	36	45	58	53	57	88	92	93	75	54	91	68	41	66	55	38	48	41	52	42	47	22	26	37	25	38	22	34	34	56	114	60	7	22	19	83	67	2	1	1	0	0	1	5	1
CH144	A2.8	000_Emulsion Control tL	27	49	48	52	86	103	87	93	89	102	113	111	97	119	110	80	90	109	95	89	44	59	70	36	27	62	14	15	6	14	10	6	2	7	0	0	1	0	0	0	1	4	5	13	34	36	38
CH145	A2.9	000_Emulsion Control tL	72	45	75	48	55	77	85	72	79	97	113	106	102	105	108	97	105	81	95	60	42	58	30	38	21	33	27	23	14	13	9	5	6	2	4	4	20	0	0	0	1	4	4	9	16	36	45
CH146	A2.10	000_Emulsion Control tL	64	106	66	84	95	111	125	126	127	144	132	155	142	130	147	133	129	98	83	80	77	75	99	85	53	50	52	29	14	7	23	4	5	3	8	0	0	2	1	14	0	22	18	41	27	71	48
CH147	A2.11	000_Emulsion Control tL	122	117	149	130	158	139	168	156	153	146	141	118	119	95	111	119	107	98	111	83	100	80	55	72	120	128	105	112	103	70	87	77	38	13	108	44	5	6	7	25	16	57	66	106	121	145	151
CH148	A2.12	000_Emulsion Control tL	82	104	116	122	106	109	94	97	94	87	78	79	76	64	59	55	94	89	68	83	90	76	81	74	53	73	62	62	48	60	25	19	19	16	7	4	3	28	21	64	109	163	183	186	162	162	185
CH150	B2.8	003_400ug CBD	57	43	12	27	36	25	14	30	62	48	64	74	59	93	95	139	107	113	58	77	92	139	56	92	122	72	66	65	49	25	47	72	100	88	81	81	86	68	13	7	18	0	29	0	10	3	5
CH151	B2.9	003_400ug CBD	63	43	47	32	31	26	22	26	7	19	33	27	36	49	55	51	60	60	54	74	55	40	43	31	22	55	62	53	31	25	96	101	42	40	21	30	26	35	26	34	11	6	22	48	96	108	74
CH152	B2.10	003_400ug CBD	62	33	32	27	16	40	16	9	8	33	26	47	32	45	23	45	28	29	36	40	21	32	31	32	33	26	22	10	15	26	17	28	35	35	17	26	22	17	22	13	6	12	6	6	10	15	30
CH153	B2.11	003_400ug CBD	88	60	117	64	54	65	38	54	79	63	61	98	76	84	41	57	102	41	32	68	33	55	39	27	66	34	37	74	33	35	106	53	29	38	8	34	16	38	17	0	45	56	20	4	4	8	9
CH155	C2.8	002_300ug CBD	53	29	51	74	86	71	77	77	60	70	74	90	93	96	95	80	77	114	71	76	72	101	89	98	102	97	77	28	64	164	77	41	43	30	107	11	20	14	17	7	23	12	13	27	4	6	15
CH156	C2.9	002_300ug CBD	70	56	46	89	45	25	66	39	58	48	92	66	76	87	82	68	76	93	73	55	99	68	58	50	76	43	41	34	49	48	92	83	39	44	44	42	43	40	65	119	72	24	3	6	4	6	10
CH157	C2.10	002_300ug CBD	101	83	69	23	29	37	49	40	34	48	77	63	37	57	58	47	55	71	26	51	45	47	61	36	25	23	59	29	25	49	36	58	81	125	34	26	8	11	43	14	26	25	8	17	16	15	31
CH158	C2.11	002_300ug CBD	52	16	29	27	25	78	41	60	54	74	82	77	59	57	50	45	50	28	69	48	48	42	67	38	61	19	31	133	33	49	24	10	33	44	79	62	12	4	9	1	6	2	4	16	3	0	9
CH159	C2.12	002_300ug CBD	39	16	43	62	48	98	52	92	52	86	114	70	77	89	86	55	78	67	80	55	71	51	45	58	68	47	41	34	50	38	65	52	31	58	61	40	74	13	22	3	18	76	24	13	9	25	31
CH160	A2.13	000_Emulsion Control tL	11	14	35	56	68	67	68	72	78	75	74	86	76	99	82	76	83	38	41	61	83	102	103	53	61	65	24	25	25	12	26	41	10	17	7	0	1	0	2	1	0	10	10	19	8	13	27
CH161	A2.14	000_Emulsion Control tL	32	25	66	53	70	66	108	108	117	116	136	132	103	122	85	85	100	104	66	66	65	57	48	33	28	48	25	12	15	19	6	14	11	3	0	2	4	0	0	3	0	4	14	24	16	48	40
CH162	A2.15	000_Emulsion Control tL	89	87	76	98	105	138	138	150	157	137	138	119	146	145	129	126	134	70	72	82	80	65	91	60	32	32	34	22	46	21	31	78	80	26	8	13	6	1	0	2	22	24	52	62	89	90	115
CH163	A2.16	000_Emulsion Control tL	92	71	118	136	152	107	107	144	121	110	96	86	89	98	84	97	93	83	93	69	101	102	78	70	92	110	117	108	117	165	201	199	182	173	214	198	175	204	207	199	179	159	204	201	169	222	200
CH166	B2.12	003_400ug CBD	72	47	31	24	28	50	51	30	46	69	65	73	69	56	54	107	114	73	77	106	66	67	80	36	95	83	113	160	90	127	187	189	135	128	95	147	195	226	87	93	143	20	36	86	105	94	42
CH167	B2.13	003_400ug CBD	48	17	34	46	55	53	59	54	77	47	43	88	65	87	66	65	82	88	60	87	93	83	88	96	112	55	17	66	94	98	83	97	66	101	126	74	76	89	118	131	108	105	84	35	61	77	85
CH168	B2.14	003_400ug CBD	73	19	29	24	40	23	20	28	26	72	69	79	84	57	58	79	54	40	18	53	57	26	28	43	41	42	74	77	67	133	36	64	33	30	42	62	58	27	34	118	99	114	16	19	3	8	33
CH169	B2.15	003_400ug CBD	43	26	19	48	40	22	29	39	85	86	77	79	68	62	42	70	29	74	81	34	72	51	47	28	62	43	20	27	80	56	40	83	54	61	62	32	63	96	73	38	55	35	10	21	57	132	122
CH172	C2.13	002_300ug CBD	54	71	40	56	29	70	63	64	51	35	55	46	60	46	53	65	64	68	56	65	55	65	56	65	53	36	67	58	71	67	126	178	148	175	156	197	216	155	141	203	172	170	186	151	149	113	97
CH173	C2.14	002_300ug CBD	104	49	54	77	40	48	54	63	79	99	123	96	117	91	81	60	78	68	65	74	94	46	112	71	105	52	42	61	48	84	79	48	42	68	13	20	41	14	37	63	49	137	77	37	24	71	38
CH174	C2.15	002_300ug CBD	33	23	16	38	60	28	84	107	57	92	99	85	83	95	89	79	81	40	65	84	76	69	51	73	77	26	54	39	72	88	57	47	38	25	25	64	27	13	21	33	21	14	5	11	7	37	23
CH175	C2.16	002_300ug CBD	25	32	26	24	30	65	53	38	73	93	78	65	79	52	39	66	33	54	61	39	25	58	36	39	33	46	68	75	53	13	55	60	42	34	24	43	40	46	20	61	35	6	24	8	25	77	81
CH208	A3.0	001_Tween	32	14	16	38	59	88	105	113	113	120	124	101	107	106	125	187	139	134	145	120	115	91	81	57	96	112	114	81	12	23	10	28	12	30	24	6	5	0	0	0	9	22	19	5	44	44	62
CH209	A3.1	001_Tween	32	44	67	59	61	84	82	126	126	114	117	129	137	103	92	134	108	84	90	82	64	58	29	57	21	9	25	6	11	18	11	167	88	18	58	9	0	2	3	2	26	6	21	11	7	8	12
CH210	A3.2	001_Tween	42	38	70	70	101	79	101	124	121	118	128	124	124	115	115	117	90	88	67	90	71	122	121	39	40	38	36	36	7	15	16	11	32	50	6	8	4	38	45	14	17	13	14	3	19	16	24
CH211	A3.3	001_Tween	68	67	98	90	72	77	72	58	54	49	54	58	44	53	49	45	46	44	55	58	29	47	41	61	38	40	76	47	36	68	25	43	25	8	10	50	72	2	10	6	6	32	33	15	26	31	27
CH214	B3.0	000_Emulsion Control tL	61	63	66	67	64	72	66	84	105	119	116	122	123	135	115	115	141	109	123	137	116	157	131	49	77	46	77	50	50	33	11	15	61	87	18	3	8	3	1	2	47	152	13	0	22	10	16
CH215	B3.1	000_Emulsion Control tL	74	43	55	59	61	69	65	64	83	90	90	84	97	101	108	108	76	67	54	73	76	42	46	38	55	43	23	19	47	40	32	22	12	34	12	79	23	32	22	22	19	10	4	39	5	3	20
CH216	B3.2	000_Emulsion Control tL	118	90	86	86	61	80	92	132	139	131	119	97	108	127	96	118	84	68	72	78	64	67	64	36	44	28	38	26	29	13	30	16	3	11	3	0	0	0	2	0	0	1	1	18	20	16	24
CH217	B3.3	000_Emulsion Control tL	78	106	98	119	119	108	130	101	77	88	81	82	72	74	65	93	71	74	76	89	75	111	85	73	97	77	80	44	18	40	134	219	65	57	49	66	91	54	25	3	9	14	18	3	27	17	50
CH220	C3.0	003_400ug CBD	97	60	39	79	86	73	75	30	26	42	42	21	30	49	78	102	48	68	72	77	61	97	73	74	37	70	125	105	32	25	81	24	39	28	11	67	63	3	13	15	7	12	5	8	5	17	13
CH221	C3.1	003_400ug CBD	100	57	39	41	47	28	45	39	88	91	22	62	59	57	53	85	44	36	36	59	60	58	49	84	31	51	30	36	15	38	59	61	34	42	24	24	23	34	54	63	62	3	0	0	16	4	2
CH222	C3.2	003_400ug CBD	49	32	36	30	43	6	34	31	14	29	11	15	52	22	14	35	19	17	39	19	17	15	26	56	38	16	30	29	41	29	34	23	3	13	31	31	25	61	8	6	23	7	2	2	10	14	3
CH223	C3.3	003_400ug CBD	14	5	11	21	21	18	42	17	22	24	21	7	41	41	11	19	46	22	54	77	35	28	23	28	17	20	11	28	9	46	57	55	5	11	12	19	0	4	54	0	5	21	32	9	11	8	5
CH224	A3.4	001_Tween	46	14	31	41	60	55	104	101	113	95	91	107	101	108	84	80	71	77	36	41	27	20	20	4	10	12	3	3	2	1	4	6	2	2	0	0	0	5	4	6	1	0	11	10	22	28	40
CH225	A3.5	001_Tween	68	38	50	46	87	110	119	129	144	137	147	146	144	117	124	115	99	82	57	71	39	30	28	40	42	23	17	10	21	12	13	0	9	4	0	0	0	0	3	0	0	3	7	12	10	40	44
CH226	A3.6	001_Tween	58	49	69	74	75	97	95	114	114	114	129	121	131	99	116	101	97	72	73	59	52	46	29	41	20	13	17	15	17	15	7	3	0	0	0	3	1	0	1	0	0	4	5	12	17	27	24
CH227	A3.7	001_Tween	82	97	116	141	132	112	105	100	109	106	99	117	96	119	88	84	87	111	120	89	94	67	52	47	47	61	31	35	34	32	13	21	14	6	7	0	2	2	0	9	2	3	30	16	31	45	56
CH228	A3.8	001_Tween	144	178	146	133	123	103	95	104	109	105	93	65	124	99	101	125	109	121	138	115	113	131	143	145	101	82	89	110	152	109	110	82	162	123	124	185	134	86	123	41	42	31	25	30	58	62	81
CH230	B3.4	000_Emulsion Control tL	60	78	66	63	68	81	99	97	107	111	140	118	132	138	136	140	138	167	116	102	103	143	98	75	90	95	184	25	46	21	9	6	3	0	5	2	1	2	0	2	1	7	2	9	10	13	26
CH231	B3.5	000_Emulsion Control tL	59	62	42	30	57	57	72	88	87	90	98	98	106	103	83	94	83	65	65	67	57	81	33	43	28	8	21	7	11	14	8	13	9	17	2	0	6	2	0	0	1	1	0	21	5	11	11
CH232	B3.6	000_Emulsion Control tL	85	77	84	78	95	106	96	75	72	84	90	84	92	77	86	77	71	65	74	66	68	95	37	58	31	33	53	35	26	22	21	8	9	8	9	28	28	0	15	6	7	10	11	14	49	38	31
CH233	B3.7	000_Emulsion Control tL	123	116	146	158	163	149	135	150	134	111	108	112	97	84	96	94	120	99	105	105	88	115	96	94	40	63	74	33	52	42	17	16	7	19	2	0	0	5	0	10	1	3	10	5	39	30	54
CH235	C3.4	003_400ug CBD	112	63	95	105	116	112	47	53	60	97	18	60	95	99	120	70	75	67	118	105	92	86	87	119	59	81	138	49	66	73	45	68	77	29	71	17	1	19	13	21	2	1	0	13	0	0	0
CH236	C3.5	003_400ug CBD	81	53	79	67	61	100	70	64	52	67	80	47	55	64	62	80	82	79	80	73	63	53	70	45	55	87	49	47	53	18	51	18	66	44	31	31	35	14	55	77	95	69	0	0	0	5	4
CH237	C3.6	003_400ug CBD	111	54	76	37	37	33	77	56	39	35	52	59	44	87	68	81	64	50	50	67	73	52	89	69	55	43	66	26	66	58	33	39	48	34	44	30	13	17	6	5	0	29	0	40	12	50	1
CH238	C3.7	003_400ug CBD	84	49	28	41	54	41	20	34	49	46	45	31	49	35	61	69	72	77	78	61	28	86	16	29	34	65	84	64	72	72	8	12	27	57	13	53	50	67	77	49	80	104	22	59	153	154	46
CH239	C3.8	003_400ug CBD	28	9	32	21	27	40	25	20	16	35	40	31	29	22	36	36	28	22	27	44	31	19	25	32	41	21	39	24	12	14	18	16	20	9	26	22	41	13	22	4	11	10	6	3	10	2	6
CH240	A3.9	001_Tween	32	30	40	78	67	105	98	122	140	144	140	136	111	119	114	86	103	71	66	53	56	50	30	17	26	14	6	26	2	4	0	2	3	5	2	7	0	0	2	0	11	0	6	35	15	29	53
CH241	A3.10	001_Tween	47	52	42	66	62	85	120	120	118	132	142	130	124	134	103	109	100	121	61	70	72	30	33	29	34	13	18	15	15	2	1	9	4	0	0	0	0	0	4	0	0	1	12	27	32	47	38
CH242	A3.11	001_Tween	71	75	109	86	112	118	118	132	117	122	149	134	148	122	110	116	88	98	83	77	76	47	52	37	33	16	39	18	12	23	12	1	12	3	2	1	0	0	2	13	3	12	18	66	58	107	60
CH243	A3.12	001_Tween	84	114	167	129	132	140	127	127	113	133	124	124	104	127	105	129	111	104	111	81	127	103	71	90	89	59	51	44	61	63	34	54	36	20	16	7	2	4	0	2	4	21	26	38	67	116	134
CH244	A3.13	001_Tween	95	109	122	136	126	123	104	99	84	109	85	119	103	117	111	130	131	133	144	150	156	143	107	99	115	116	184	180	111	115	125	92	126	110	51	75	51	33	52	40	64	119	199	174	175	203	210
CH246	B3.8	000_Emulsion Control tL	68	85	80	70	72	90	84	82	80	99	124	120	121	108	110	96	82	94	58	90	99	60	128	129	175	212	116	83	124	151	155	49	8	41	16	36	2	8	1	1	1	14	6	15	2	23	17
CH247	B3.9	000_Emulsion Control tL	99	70	64	41	53	81	91	97	96	113	124	122	103	120	122	99	80	75	66	44	58	65	46	41	65	29	21	18	13	24	12	2	18	14	5	1	0	2	0	0	9	4	4	6	21	22	28
CH248	B3.10	000_Emulsion Control tL	105	113	103	127	145	118	110	141	132	134	118	124	110	114	101	130	153	124	107	93	86	60	93	97	22	78	65	115	46	18	9	4	3	42	67	37	0	1	3	2	0	7	12	35	44	69	53
CH249	B3.11	000_Emulsion Control tL	132	181	151	149	173	170	172	173	156	130	144	101	115	98	98	105	94	102	111	110	139	94	92	85	82	98	96	92	71	66	114	107	55	33	35	2	4	2	10	2	5	5	35	61	103	145	172
CH251	C3.9	003_400ug CBD	41	25	33	39	58	41	29	49	52	39	64	51	80	80	97	80	79	70	63	73	96	96	49	94	85	43	100	86	87	53	37	88	101	133	59	35	42	36	24	43	18	6	1	3	0	34	14
CH252	C3.10	003_400ug CBD	73	56	44	54	49	61	44	68	27	66	51	82	85	84	66	78	66	101	87	97	64	80	87	52	65	92	86	39	45	50	40	42	79	52	36	35	49	15	31	55	76	8	16	3	6	2	1
CH253	C3.11	003_400ug CBD	86	17	61	47	45	16	46	30	46	36	25	51	59	61	59	46	50	43	94	46	40	49	29	65	48	53	98	45	34	52	46	36	37	60	54	53	71	121	44	23	37	24	18	41	48	65	16
CH254	C3.12	003_400ug CBD	40	13	15	8	18	34	26	32	9	30	31	14	19	38	48	47	25	32	30	20	29	20	12	25	38	63	26	44	28	46	55	20	12	15	23	25	71	31	30	24	26	11	7	3	8	1	6
CH255	C3.13	003_400ug CBD	25	17	14	30	28	79	33	37	35	43	43	76	66	56	79	34	61	67	65	61	44	41	44	100	54	25	80	66	44	51	97	89	53	88	49	48	43	38	52	11	19	31	77	10	6	2	13
CH257	A3.14	001_Tween	66	85	63	67	87	104	79	94	91	98	88	76	85	67	71	79	73	70	84	63	71	71	52	75	43	58	93	44	31	29	19	8	8	12	11	49	51	3	14	16	11	20	13	44	40	58	95
CH258	A3.15	001_Tween	76	37	81	120	104	119	96	93	110	87	79	95	83	85	71	84	88	93	71	65	43	64	54	56	40	46	69	33	35	19	80	19	24	24	10	34	20	4	9	3	13	27	62	106	118	128	152
CH259	A3.16	001_Tween	81	81	135	160	117	114	95	105	108	86	110	88	103	118	100	113	86	96	119	115	115	142	131	140	114	143	133	144	124	131	185	186	235	242	236	212	201	218	212	241	245	240	252	242	223	230	218
CH262	B3.12	000_Emulsion Control tL	27	66	99	135	150	122	114	91	120	143	126	149	129	114	131	113	140	103	115	130	157	154	120	146	133	80	70	136	93	53	12	21	15	18	27	5	2	6	5	9	14	12	3	68	31	40	43
CH263	B3.13	000_Emulsion Control tL	64	59	80	95	71	87	85	83	82	98	82	73	65	78	84	94	66	64	47	93	74	95	75	76	55	46	50	48	122	134	57	106	122	65	31	63	141	158	142	97	53	91	37	47	38	73	57
CH264	B3.14	000_Emulsion Control tL	68	54	90	97	87	92	132	96	99	95	84	82	84	89	88	70	99	87	77	62	72	61	65	57	46	44	55	47	41	28	36	48	35	42	52	139	123	63	42	27	49	45	89	152	148	153	172
CH265	B3.15	000_Emulsion Control tL	52	79	117	154	169	149	148	138	117	113	120	82	85	70	99	104	93	101	106	117	116	90	81	83	97	77	104	137	169	134	148	214	225	217	221	218	223	217	204	201	208	235	239	224	219	239	217
CH268	C3.14	003_400ug CBD	45	33	27	47	84	67	105	93	68	84	71	93	114	117	123	99	105	104	102	123	111	118	137	133	60	111	75	67	98	103	86	100	65	146	171	225	175	203	65	98	163	159	174	125	133	128	113
CH269	C3.15	003_400ug CBD	61	14	60	41	90	62	71	64	30	62	70	62	70	45	57	73	82	101	108	64	34	75	91	86	88	109	44	44	43	79	62	128	117	84	61	126	116	50	32	46	105	107	69	27	12	26	143
CH270	C3.16	003_400ug CBD	74	24	48	23	70	69	89	51	38	54	69	46	61	67	52	66	29	47	48	50	53	62	79	48	38	45	70	79	36	27	49	57	24	67	50	64	105	18	21	71	47	24	37	8	31	38	35
CH289	A4.0	002_300ug CBD	21	23	22	7	8	11	18	31	35	54	61	58	56	55	36	67	60	38	57	52	32	21	11	19	23	24	28	23	3	31	28	29	36	36	29	15	9	19	10	0	0	0	5	9	6	17	7
CH290	A4.1	002_300ug CBD	74	75	23	36	25	36	77	88	113	57	87	62	72	89	64	89	53	63	65	80	36	87	51	61	109	33	47	55	69	145	169	47	14	35	27	32	18	49	41	7	2	0	2	2	10	16	21
CH295	B4.0	001_Tween	93	84	76	64	71	70	91	68	62	81	83	84	86	79	94	84	65	76	147	98	127	125	112	101	101	58	79	49	39	37	32	34	28	100	4	9	2	8	2	0	8	10	13	9	20	26	33
CH296	B4.1	001_Tween	68	78	70	53	58	43	53	54	51	59	40	47	52	58	68	59	73	69	50	74	72	69	82	69	50	48	49	33	29	24	21	39	2	10	10	12	17	7	6	0	0	5	18	12	20	28	19
CH301	C4.0	000_Emulsion Control tL	116	103	115	85	71	57	68	47	65	70	47	95	91	63	52	46	48	44	48	48	46	55	45	56	24	67	40	67	12	10	3	10	15	6	4	10	2	1	16	0	1	14	1	4	8	0	5
CH302	C4.1	000_Emulsion Control tL	25	62	70	90	63	104	73	47	66	54	50	60	50	39	38	59	56	33	25	67	54	73	61	55	13	26	33	24	30	26	30	16	6	29	39	16	0	3	3	17	2	14	2	3	2	3	7
CH304	A4.2	002_300ug CBD	26	29	85	55	51	55	43	56	55	53	70	74	86	86	84	99	100	100	74	88	70	63	112	126	159	183	227	217	194	189	215	217	222	122	86	169	192	86	93	132	31	21	44	25	38	81	73
CH305	A4.3	002_300ug CBD	47	17	67	53	53	19	50	9	49	55	78	78	82	80	81	107	82	91	102	59	72	79	75	81	97	80	59	80	29	78	59	53	75	68	59	110	131	131	175	139	156	80	22	32	76	113	155
CH306	A4.4	002_300ug CBD	34	19	21	36	40	41	46	25	49	62	45	28	62	51	58	50	28	52	25	40	37	47	41	16	18	19	31	21	34	13	5	2	10	11	11	11	9	6	4	3	6	0	24	27	118	172	141
CH307	A4.5	002_300ug CBD	73	42	51	59	27	49	42	46	38	37	27	25	49	27	26	34	31	30	47	32	18	15	23	47	26	31	101	41	40	23	19	15	13	18	67	64	79	13	19	15	9	9	7	7	6	13	20
CH310	B4.2	001_Tween	71	90	70	57	50	65	69	45	42	75	67	70	68	69	92	70	66	62	68	61	56	70	94	146	78	64	160	83	67	77	95	129	112	21	22	69	136	39	59	32	29	72	60	42	35	20	36
CH311	B4.3	001_Tween	87	90	82	65	57	89	89	86	104	131	111	134	153	150	124	131	137	66	117	81	87	60	66	46	43	40	67	56	36	45	38	114	29	11	34	26	21	23	1	15	14	13	11	13	13	19	31
CH312	B4.4	001_Tween	79	82	101	96	92	95	68	99	110	105	108	96	105	82	87	73	81	66	74	67	45	48	45	37	29	36	26	34	13	25	218	25	19	9	5	8	28	1	15	4	8	5	3	8	9	7	23
CH313	B4.5	001_Tween	98	112	137	100	116	99	98	67	73	85	84	69	72	71	68	62	70	82	49	57	60	63	51	61	51	51	85	135	97	114	151	154	43	52	25	43	60	4	14	13	13	10	7	16	18	23	34
CH316	C4.2	000_Emulsion Control tL	146	140	86	78	66	82	57	84	86	93	109	103	105	100	109	108	86	84	108	64	116	61	60	72	56	62	97	193	127	98	94	19	52	50	57	19	16	0	32	61	36	9	3	5	6	3	12
CH317	C4.3	000_Emulsion Control tL	87	80	71	44	50	77	65	66	51	65	71	67	74	47	59	70	47	46	36	49	49	39	29	62	40	45	31	12	14	12	14	10	25	4	9	5	2	2	2	2	1	5	1	3	19	0	20
CH318	C4.4	000_Emulsion Control tL	59	75	113	137	136	162	163	125	152	146	130	119	104	113	104	67	86	63	48	63	56	49	31	28	48	21	26	19	26	17	4	21	6	15	3	19	41	18	10	0	0	2	6	3	5	12	11
CH319	C4.5	000_Emulsion Control tL	23	67	134	133	133	119	127	129	112	111	97	85	92	103	104	124	98	84	103	100	67	98	76	64	50	56	65	110	116	121	63	37	105	38	88	104	139	159	47	18	5	14	6	5	6	33	31
CH320	A4.6	002_300ug CBD	26	28	51	35	39	22	41	44	40	44	62	72	101	75	70	82	115	56	67	34	58	74	23	34	17	55	54	10	59	20	12	53	0	3	5	9	4	2	9	0	1	0	0	1	6	7	2
CH321	A4.7	002_300ug CBD	56	41	28	14	66	56	36	52	33	29	59	54	50	39	40	41	48	21	42	48	22	22	47	9	14	12	10	8	7	16	8	8	14	3	0	4	71	5	5	8	4	0	10	1	4	3	0
CH322	A4.8	002_300ug CBD	48	18	25	41	46	28	71	69	77	48	48	34	46	39	40	45	46	24	43	16	39	8	31	6	12	31	1	11	19	8	12	14	23	35	19	15	15	16	6	7	5	0	4	11	8	18	14
CH323	A4.9	002_300ug CBD	87	55	43	48	51	63	67	78	85	86	109	67	81	53	52	42	32	44	30	36	30	31	15	42	35	31	44	25	45	24	15	19	38	49	34	40	48	6	1	2	36	0	0	4	27	14	37
CH324	A4.10	002_300ug CBD	74	106	134	96	133	119	99	123	77	121	84	72	55	47	31	60	70	59	62	54	47	51	36	49	45	96	79	88	52	41	90	77	42	9	19	18	42	10	11	9	22	12	25	51	20	24	56
CH326	B4.6	001_Tween	66	69	39	48	39	59	98	85	94	118	116	130	126	134	123	115	91	87	111	89	106	82	77	72	23	29	12	14	15	14	59	21	8	46	16	8	10	0	0	0	15	9	0	1	18	21	18
CH327	B4.7	001_Tween	99	83	44	67	55	74	49	68	79	86	93	97	96	102	101	108	88	74	61	65	48	33	32	44	21	25	20	22	16	13	14	17	10	8	12	4	2	0	0	0	5	4	1	4	12	27	12
CH328	B4.8	001_Tween	93	72	84	58	99	75	88	102	123	100	122	90	108	112	89	88	87	76	74	52	48	51	55	33	75	38	35	27	32	79	55	168	40	23	0	9	1	2	0	22	177	138	170	89	50	53	64
CH329	B4.9	001_Tween	69	113	109	147	134	116	110	132	102	129	114	118	113	99	116	104	117	87	99	119	77	108	68	66	91	47	41	18	32	44	18	29	42	36	88	22	3	34	5	2	3	21	25	16	49	43	86
CH331	C4.6	000_Emulsion Control tL	90	94	93	77	88	94	104	103	103	133	134	143	138	148	147	148	144	165	172	202	167	149	151	132	139	147	112	89	133	79	47	23	29	14	15	13	14	20	2	1	12	7	10	18	17	20	31
CH332	C4.7	000_Emulsion Control tL	83	85	71	36	42	56	46	52	88	86	83	96	111	106	121	101	92	43	72	64	56	30	42	39	37	36	35	35	32	16	15	2	11	18	6	23	2	3	2	0	0	3	2	3	1	7	9
CH333	C4.8	000_Emulsion Control tL	96	55	77	66	56	49	63	69	70	84	80	84	106	105	95	90	104	99	89	87	61	77	61	73	49	30	32	21	6	10	9	10	4	4	7	2	0	8	45	0	5	0	0	17	5	12	34
CH334	C4.9	000_Emulsion Control tL	43	48	83	105	89	83	59	68	71	74	71	55	77	90	90	91	72	74	59	50	88	51	62	45	34	32	51	16	14	19	18	11	2	6	7	3	0	0	4	0	0	1	1	11	7	12	18
CH335	C4.10	000_Emulsion Control tL	27	46	126	151	159	178	177	166	171	152	141	124	123	122	101	95	97	104	100	83	78	104	82	79	61	56	40	47	47	24	22	27	12	15	6	6	0	2	3	0	0	0	0	5	43	47	68
CH336	A4.11	002_300ug CBD	47	66	51	47	62	69	50	22	13	19	62	58	58	56	87	104	26	71	80	44	63	65	14	9	39	68	68	74	50	7	42	7	12	57	80	54	72	19	67	68	2	4	2	15	2	4	16
CH337	A4.12	002_300ug CBD	73	37	50	38	13	41	40	47	27	24	55	24	32	37	36	48	38	41	36	41	25	39	12	39	12	22	26	10	5	31	9	60	39	14	10	30	6	5	2	0	1	1	4	1	14	9	24
CH338	A4.13	002_300ug CBD	54	51	39	44	62	31	28	43	33	78	59	32	69	47	56	53	71	57	52	74	46	98	39	74	51	63	55	74	50	39	30	72	42	39	141	158	181	100	8	4	6	0	2	0	3	13	29
CH339	A4.14	002_300ug CBD	66	37	31	28	32	43	32	47	52	51	54	47	37	39	36	54	44	30	25	40	34	38	29	70	17	35	83	41	53	40	36	23	34	26	22	44	49	7	19	23	11	16	10	37	48	59	45
CH342	B4.10	001_Tween	65	27	75	72	46	77	94	93	68	78	104	91	87	75	79	85	67	56	90	46	56	40	26	59	27	33	49	38	25	26	15	43	43	10	13	26	32	4	14	10	4	17	8	15	20	48	25
CH343	B4.11	001_Tween	62	62	40	61	59	90	100	126	108	128	136	108	117	118	75	116	78	67	80	69	54	33	38	45	21	28	33	26	30	18	14	6	10	11	15	10	0	0	1	0	2	0	6	17	26	19	42
CH344	B4.12	001_Tween	80	71	80	100	128	132	104	132	131	131	126	140	131	100	108	109	117	107	81	70	69	60	44	68	51	55	70	36	36	58	20	18	15	9	14	4	0	3	10	2	8	5	16	16	43	62	77
CH345	B4.13	001_Tween	72	79	120	108	123	122	125	85	78	85	72	69	82	95	81	68	76	68	73	77	62	69	86	89	66	62	115	88	59	88	67	65	37	30	53	77	54	7	15	17	10	22	43	63	122	145	167
CH348	C4.11	000_Emulsion Control tL	54	54	59	37	37	66	77	78	72	117	87	111	120	103	82	89	95	83	65	96	88	73	84	61	83	54	32	66	110	79	97	208	115	90	91	83	73	16	5	3	0	9	0	15	30	11	20
CH349	C4.12	000_Emulsion Control tL	83	57	69	31	69	86	57	77	65	101	98	93	101	108	111	114	117	131	76	83	99	93	79	84	93	60	45	59	61	53	22	11	34	22	4	4	1	8	9	0	2	0	4	8	36	26	38
CH350	C4.13	000_Emulsion Control tL	70	58	81	65	95	95	104	113	110	127	116	125	133	127	147	135	129	113	140	115	80	93	85	73	47	120	88	65	53	24	49	23	45	9	10	3	7	2	0	1	0	5	5	7	52	61	80
CH351	C4.14	000_Emulsion Control tL	48	69	118	133	104	122	138	120	135	125	132	138	120	111	100	103	98	121	129	120	128	146	122	129	133	132	99	110	102	62	96	88	44	84	58	96	101	111	81	29	122	28	67	76	93	115	177
CH353	A4.15	002_300ug CBD	57	25	15	17	74	81	40	36	78	42	45	56	38	43	41	79	91	76	54	34	78	96	89	86	37	64	83	88	78	124	110	77	57	84	57	54	103	113	67	65	27	64	54	26	41	59	94
CH354	A4.16	002_300ug CBD	48	29	30	20	18	40	38	27	34	34	43	43	32	31	50	44	35	32	21	57	41	51	42	44	31	34	46	18	32	47	71	72	47	41	63	49	40	5	5	9	17	11	9	15	64	66	56
CH359	B4.14	001_Tween	49	60	82	55	97	98	134	130	126	109	127	121	110	124	102	96	86	112	140	71	75	59	71	79	66	81	47	38	102	34	69	111	45	35	60	62	19	23	3	2	6	2	16	29	35	80	85
CH360	B4.15	001_Tween	33	53	69	70	73	76	109	121	99	102	102	98	76	93	69	98	98	67	94	80	90	83	106	75	61	76	53	76	54	47	64	96	56	69	80	93	100	25	6	36	23	46	40	108	124	151	157
CH365	C4.15	000_Emulsion Control tL	26	37	36	60	99	90	60	40	52	73	49	61	68	50	59	57	40	61	70	59	68	77	83	102	72	63	105	97	69	56	38	25	49	46	101	182	107	62	58	49	6	24	47	60	129	185	135
CH366	C4.16	000_Emulsion Control tL	27	55	54	68	81	100	85	98	89	92	101	91	95	91	98	115	100	85	118	105	92	117	105	91	95	75	93	93	77	96	80	86	67	78	82	66	83	91	49	101	109	66	51	83	157	150	148
[truncated: 98 more columns]

## Sheet: CBD ex2 tR
DATE:	2023-06-09 12:17:33
FILE:	C:\Software\WMicrotracker One\wmicrotracker_w8_v30api\wmicrotracker\p00027\20230606_1142
SUBPROJECT:	2023 0609 wDAT CBD 500-1000ug tR
<<<<<< Group Activity: Average Activity Counts per Data Interval>>>>>>
Group/Time[m]	30	60	90	120	150	180	210	240	270	300	330	360	390	420	450	480	510	540	570	600	630	660	690	720	750	780	810	840	870	900	930	960	990	1020	1050	1080	1110	1140	1170	1200	1230	1260	1290	1320	1350	1380	1410	1440	1470
000_Emulsion Control	51	53	67	70	76	78	85	81	82	88	87	85	86	86	82	81	77	74	69	67	67	61	54	59	59	48	54	47	45	37	35	31	35	38	25	23	24	19	17	17	17	17	26	32	38	44	53	57	62
001_500ug CBD	43	29	33	31	34	27	22	25	25	22	26	33	33	39	37	43	43	37	38	41	36	39	34	37	37	39	44	36	41	37	43	45	47	43	40	48	50	40	39	37	30	31	28	21	23	20	19	24	32
002_750 ug CBD	44	23	24	29	33	28	24	23	16	19	21	24	27	25	27	31	34	38	33	33	30	31	34	32	30	30	45	40	31	30	36	33	34	33	37	34	36	31	28	31	34	32	38	40	32	34	27	27	24
003_1000 ug CBD	45	22	24	25	24	22	19	21	14	14	13	17	17	19	19	24	26	28	32	31	28	28	27	30	27	30	33	25	29	24	28	28	32	27	31	33	38	32	32	33	30	36	32	26	29	30	30	31	25
<<<<<< Group Activity: Standard Error >>>>>>
Group/Time[m]	30	60	90	120	150	180	210	240	270	300	330	360	390	420	450	480	510	540	570	600	630	660	690	720	750	780	810	840	870	900	930	960	990	1020	1050	1080	1110	1140	1170	1200	1230	1260	1290	1320	1350	1380	1410	1440	1470
000_Emulsion Control	1.7	3.5	2.3	1.2	1.7	1.7	2.3	2.9	4	1.7	1.7	1.7	2.9	2.9	2.3	1.7	1.2	4	2.3	3.5	2.9	2.9	4	6.4	2.9	5.8	5.8	5.2	1.7	7.5	5.8	6.4	3.5	5.2	2.9	1.2	3.5	1.7	2.9	1.7	1.2	4	5.2	6.9	6.9	3.5	1.2	2.3	0.6
001_500ug CBD	5.8	6.9	6.4	5.8	9.8	8.1	5.8	7.5	8.7	4.6	6.4	7.5	4.6	5.8	5.8	8.1	9.2	9.2	7.5	8.1	5.8	8.7	8.1	7.5	8.1	9.2	6.9	7.5	9.8	9.2	9.2	9.8	12.1	9.2	8.1	13.9	8.1	8.1	8.1	6.9	1.7	4.6	2.9	2.3	1.7	2.9	2.3	4.6	6.9
002_750 ug CBD	4	2.9	0	1.2	3.5	3.5	2.9	1.7	1.7	2.9	1.7	2.9	2.9	1.2	2.3	1.7	3.5	2.3	1.2	2.9	4	3.5	3.5	3.5	5.2	3.5	3.5	4.6	1.7	4	1.7	5.8	3.5	1.2	2.9	2.9	1.2	2.9	3.5	2.3	3.5	3.5	4.6	5.2	4.6	4.6	3.5	2.9	0.6
003_1000 ug CBD	7.5	4	3.5	3.5	3.5	5.8	4.6	4.6	4.6	4.6	4	5.2	4	2.9	4	4.6	2.3	4	6.4	5.2	6.4	6.9	5.2	8.7	8.1	7.5	9.8	5.2	5.8	6.9	5.2	6.4	9.2	6.4	8.1	6.9	7.5	5.8	4.6	4.6	7.5	5.2	1.2	1.2	1.2	6.9	1.7	5.8	7.5
<<<<<< Group Activity: Number of wells/group >>>>>>
Group/Time[m]	30	60	90	120	150	180	210	240	270	300	330	360	390	420	450	480	510	540	570	600	630	660	690	720	750	780	810	840	870	900	930	960	990	1020	1050	1080	1110	1140	1170	1200	1230	1260	1290	1320	1350	1380	1410	1440	1470
000_Emulsion Control	3	3	3	3	3	3	3	3	3	3	3	3	3	3	3	3	3	3	3	3	3	3	3	3	3	3	3	3	3	3	3	3	3	3	3	3	3	3	3	3	3	3	3	3	3	3	3	3	3
001_500ug CBD	3	3	3	3	3	3	3	3	3	3	3	3	3	3	3	3	3	3	3	3	3	3	3	3	3	3	3	3	3	3	3	3	3	3	3	3	3	3	3	3	3	3	3	3	3	3	3	3	3
002_750 ug CBD	3	3	3	3	3	3	3	3	3	3	3	3	3	3	3	3	3	3	3	3	3	3	3	3	3	3	3	3	3	3	3	3	3	3	3	3	3	3	3	3	3	3	3	3	3	3	3	3	3
003_1000 ug CBD	3	3	3	3	3	3	3	3	3	3	3	3	3	3	3	3	3	3	3	3	3	3	3	3	3	3	3	3	3	3	3	3	3	3	3	3	3	3	3	3	3	3	3	3	3	3	3	3	3
<<<<<< Number of Samples per Acquisition Interval [1unit=500values] >>>>>>
Time[m]	30	60	90	120	150	180	210	240	270	300	330	360	390	420	450	480	510	540	570	600	630	660	690	720	750	780	810	840	870	900	930	960	990	1020	1050	1080	1110	1140	1170	1200	1230	1260	1290	1320	1350	1380	1410	1440	1470
#Samples	30	30	30	30	30	30	30	30	30	30	30	30	30	30	30	30	30	30	30	30	30	30	30	30	30	30	30	30	30	30	30	30	30	30	30	30	30	30	30	30	30	30	30	30	30	30	30	30	30
<<<<<< Average Temperature [°C] >>>>>>
Time[m]	30	60	90	120	150	180	210	240	270	300	330	360	390	420	450	480	510	540	570	600	630	660	690	720	750	780	810	840	870	900	930	960	990	1020	1050	1080	1110	1140	1170	1200	1230	1260	1290	1320	1350	1380	1410	1440	1470
Temp[°C]	22.3	22.6	22.6	22.6	22.6	22.6	22.6	22.6	22.6	22.6	22.8	22.8	22.8	22.8	22.8	22.8	22.8	22.8	22.8	22.8	22.8	22.8	22.8	22.8	22.8	22.8	22.8	22.8	22.8	22.8	22.8	22.8	22.8	22.8	22.8	22.8	22.8	22.8	22.8	22.8	22.8	22.8	22.8	22.8	22.8	22.8	22.8	22.8	22.8
<<<<<< Well Activity >>>>>>
Well	Group/Time[m]	30	60	90	120	150	180	210	240	270	300	330	360	390	420	450	480	510	540	570	600	630	660	690	720	750	780	810	840	870	900	930	960	990	1020	1050	1080	1110	1140	1170	1200	1230	1260	1290	1320	1350	1380	1410	1440
A1	003_1000 ug CBD	32	16	19	20	19	13	11	14	7	7	7	8	10	13	11	16	22	20	22	23	18	16	17	17	14	16	19	16	24	14	20	18	18	17	20	20	27	22	23	26	19	27	32	26	27	21	28	19
B1	002_750 ug CBD	50	28	24	31	40	32	28	26	18	23	23	28	28	24	27	30	36	42	32	30	27	34	32	29	25	29	47	45	33	36	39	41	40	32	42	29	38	35	35	28	38	33	43	51	37	38	28	32
C1	001_500ug CBD	41	25	29	24	21	16	12	14	15	13	16	22	25	29	30	34	28	22	29	29	27	31	22	24	22	24	32	22	26	21	25	26	27	27	30	33	39	27	28	28	28	24	22	17	19	14	19	16
A2	000_Emulsion Control	48	48	63	71	79	81	85	87	87	89	88	88	91	89	86	80	75	68	66	60	62	56	48	48	54	37	43	37	42	25	25	23	38	32	19	23	31	20	14	15	16	19	31	36	39	50	54	58
B2	003_1000 ug CBD	46	19	22	25	21	20	18	19	13	13	12	18	19	22	22	24	30	30	31	29	26	30	33	28	26	33	28	27	23	20	27	25	28	25	26	38	35	32	36	32	28	44	34	28	30	25	28	34
C2	002_750 ug CBD	47	24	24	29	30	30	25	21	17	21	18	25	31	25	31	34	39	37	35	38	38	36	40	39	40	37	50	44	33	33	35	22	30	35	37	37	36	26	26	36	36	26	29	34	36	40	32	28
A3	001_500ug CBD	34	20	24	27	28	23	21	22	19	23	25	31	34	39	33	36	42	34	33	37	34	29	31	36	40	36	43	40	38	39	50	51	46	44	35	36	46	38	34	32	29	40	32	24	25	23	22	32
B3	000_Emulsion Control	53	53	70	70	74	77	89	79	84	90	89	83	85	80	78	79	78	72	68	71	72	63	52	60	63	50	59	51	47	35	36	27	28	49	29	22	20	15	14	21	20	23	31	41	50	43	54	61
C3	003_1000 ug CBD	58	30	30	31	31	33	27	30	23	22	21	26	23	21	25	31	26	33	43	40	39	39	32	46	41	41	51	33	40	38	37	40	50	38	46	42	52	41	38	42	44	38	31	25	29	43	34	39
A4	002_750 ug CBD	36	18	24	27	30	21	19	22	13	14	21	18	22	27	23	28	28	34	31	30	26	24	29	28	24	25	39	30	27	22	33	37	31	31	32	37	35	33	24	30	27	37	42	36	22	25	20	22
B4	001_500ug CBD	54	43	45	43	53	43	32	40	42	29	38	47	40	48	49	59	60	54	53	57	47	56	50	50	49	56	56	47	59	52	54	59	68	59	56	76	66	55	54	50	34	30	29	22	24	22	15	24
C4	000_Emulsion Control	52	59	67	68	74	75	82	77	74	84	84	83	81	88	83	84	79	82	73	69	67	65	62	70	59	57	60	54	45	50	44	44	38	34	27	25	21	21	22	15	16	9	16	19	26	38	50	53
<<<<<< Channel Activity >>>>>>
Channel	Well	Group/Time[m]	30	60	90	120	150	180	210	240	270	300	330	360	390	420	450	480	510	540	570	600	630	660	690	720	750	780	810	840	870	900	930	960	990	1020	1050	1080	1110	1140	1170	1200	1230	1260	1290	1320	1350	1380	1410
CH17	A1.0	003_1000 ug CBD	23	0	0	1	0	0	0	1	0	0	0	0	0	0	0	0	0	0	0	0	0	0	0	0	0	0	0	0	0	0	0	0	0	0	0	0	0	0	0	0	0	0	0	0	0	0	0
CH18	A1.1	003_1000 ug CBD	33	67	61	38	23	16	13	33	23	8	4	5	7	29	10	15	2	15	7	19	7	15	10	16	19	11	23	15	19	7	9	2	2	11	65	26	36	15	8	35	5	15	12	56	19	11	9
CH23	B1.0	002_750 ug CBD	45	3	3	2	0	0	0	2	0	0	0	0	0	0	0	0	0	0	0	0	0	0	0	0	0	0	0	0	0	0	0	0	0	0	0	0	0	0	0	0	0	0	0	0	0	0	0
CH24	B1.1	002_750 ug CBD	23	4	7	21	20	1	7	9	7	8	4	4	7	5	5	5	5	21	11	4	4	4	12	17	3	15	29	11	10	7	2	4	2	5	6	8	6	3	2	4	12	3	4	6	3	0	1
CH29	C1.0	001_500ug CBD	17	2	16	10	6	3	0	0	0	0	1	0	0	0	0	0	0	0	0	0	0	0	0	0	0	0	0	0	0	0	0	0	0	0	0	0	0	0	0	0	0	0	0	0	0	0	0
CH30	C1.1	001_500ug CBD	16	27	65	20	19	21	14	9	23	5	14	14	6	16	28	19	10	12	9	33	6	28	29	15	15	23	20	48	80	9	6	23	26	76	18	8	58	28	16	36	37	112	12	6	9	12	44
CH32	A1.2	003_1000 ug CBD	22	17	6	21	22	14	13	9	0	4	18	0	9	8	4	36	39	77	29	5	22	20	6	7	11	9	15	33	31	30	40	9	10	4	11	3	4	6	5	43	0	42	44	24	11	3	19
CH33	A1.3	003_1000 ug CBD	37	10	15	8	3	6	0	5	6	4	0	0	0	4	1	3	16	4	3	16	17	26	23	10	18	5	4	0	22	5	19	11	3	54	33	4	28	2	13	75	27	24	15	9	21	2	2
CH34	A1.4	003_1000 ug CBD	43	18	14	19	3	6	5	13	8	4	5	4	6	1	4	12	9	6	5	14	5	11	11	18	7	11	15	6	6	8	3	2	5	2	7	12	21	9	5	5	7	2	4	9	5	0	4
CH35	A1.5	003_1000 ug CBD	30	31	23	32	41	14	7	16	13	14	12	18	11	5	15	6	4	4	5	9	7	12	2	13	3	9	14	16	9	14	15	7	35	24	5	18	32	22	3	5	5	1	5	20	12	16	21
CH38	B1.2	002_750 ug CBD	63	38	31	36	15	28	13	7	9	33	26	15	3	13	17	16	26	46	22	12	39	43	18	45	61	20	6	10	14	49	87	32	18	39	33	23	18	9	0	10	20	0	60	69	21	6	20
CH39	B1.3	002_750 ug CBD	58	16	21	38	41	40	5	42	8	3	19	0	11	7	23	43	30	51	32	38	45	74	46	16	44	21	53	56	14	6	38	48	22	42	40	32	62	26	32	21	30	80	55	11	18	16	0
CH40	B1.4	002_750 ug CBD	55	10	13	22	17	13	13	13	12	5	9	21	24	46	7	12	5	8	20	40	30	2	6	11	2	7	25	33	13	10	17	4	40	49	13	6	17	11	19	26	41	28	7	31	35	13	18
CH41	B1.5	002_750 ug CBD	52	22	42	23	42	26	7	8	24	26	27	26	18	21	12	22	27	16	19	11	22	49	51	24	8	15	38	66	75	62	90	49	86	20	31	24	12	41	18	33	26	7	43	97	106	97	28
CH44	C1.2	001_500ug CBD	43	8	21	0	0	0	0	1	0	0	0	0	0	0	0	0	3	10	3	7	10	7	12	11	20	15	52	18	49	34	27	35	28	36	71	39	22	0	5	0	5	2	0	0	27	2	2
CH45	C1.3	001_500ug CBD	39	11	10	12	15	10	5	17	6	5	4	5	27	19	10	20	12	11	18	28	14	15	6	22	12	16	34	24	6	6	4	8	13	4	15	36	45	3	18	15	11	6	12	4	3	8	17
CH46	C1.4	001_500ug CBD	34	4	8	25	18	19	11	6	8	0	14	23	25	14	27	26	31	15	19	26	42	35	25	14	21	65	48	36	38	25	9	24	42	12	20	14	23	32	31	9	4	8	0	2	0	0	3
CH47	C1.5	001_500ug CBD	31	31	39	42	17	46	19	27	21	1	30	61	24	31	46	45	22	23	19	26	44	40	12	33	31	40	49	19	36	50	11	38	18	14	7	35	64	69	25	7	53	14	6	7	10	11	2
CH48	A1.6	003_1000 ug CBD	45	4	22	26	28	13	20	9	3	2	3	6	0	12	3	17	26	5	22	7	15	16	35	25	40	56	37	44	34	30	92	43	51	14	17	62	124	54	30	28	41	42	64	41	8	56	134
CH49	A1.7	003_1000 ug CBD	42	5	12	22	10	18	19	12	9	3	3	6	8	4	6	9	12	3	10	7	7	8	14	19	5	11	8	8	15	9	5	5	13	3	7	19	4	2	4	8	4	4	7	8	25	11	2
CH50	A1.8	003_1000 ug CBD	51	22	17	32	24	22	5	19	5	0	3	0	0	24	16	2	21	21	8	17	16	13	7	6	0	4	6	11	8	0	13	24	11	0	3	0	3	10	13	7	7	7	51	34	15	18	0
CH51	A1.9	003_1000 ug CBD	40	3	26	20	26	15	13	10	4	2	10	10	37	17	11	48	44	24	32	24	4	8	29	42	24	12	19	14	38	4	7	42	17	39	23	10	10	28	37	14	15	26	35	5	12	32	62
CH52	A1.10	003_1000 ug CBD	8	0	3	2	0	0	1	7	1	0	0	0	0	0	0	0	0	0	0	0	0	0	0	0	0	0	0	0	0	0	0	0	0	0	0	0	0	0	0	0	0	0	1	0	0	0	0
CH54	B1.6	002_750 ug CBD	49	43	27	12	33	31	55	65	55	0	21	81	25	25	15	14	65	52	11	21	20	22	13	9	8	21	83	45	17	9	6	0	7	5	44	14	6	26	25	0	0	0	27	0	1	4	24
CH55	B1.7	002_750 ug CBD	45	38	33	27	22	32	26	7	5	12	17	15	11	22	36	61	65	51	63	35	29	35	58	42	50	23	19	10	37	39	16	49	62	28	105	33	13	24	40	41	27	37	56	107	18	0	0
CH56	B1.8	002_750 ug CBD	52	56	41	44	83	36	33	5	10	13	4	4	31	30	49	32	44	71	11	36	27	7	16	38	49	48	20	6	17	8	12	33	65	18	17	20	79	27	64	14	4	9	17	9	5	6	27
CH57	B1.9	002_750 ug CBD	48	24	14	58	32	28	25	17	34	21	24	38	30	33	31	39	31	58	63	22	19	25	57	27	9	32	17	21	9	16	24	74	54	12	64	40	49	33	49	9	32	10	10	35	16	59	29
CH59	C1.6	001_500ug CBD	71	113	65	45	9	2	1	1	0	0	0	0	0	0	0	0	0	0	0	0	0	0	0	0	0	19	18	2	0	1	0	0	0	0	0	0	5	0	0	2	0	0	0	0	0	0	0
CH60	C1.7	001_500ug CBD	71	23	27	30	40	10	19	10	35	15	21	16	35	49	45	72	58	75	85	77	72	66	21	31	13	19	44	28	24	29	73	43	34	59	22	59	70	44	58	72	63	11	33	14	23	22	21
CH61	C1.8	001_500ug CBD	45	7	17	23	14	15	17	20	17	12	15	22	22	20	51	44	33	41	24	18	25	17	31	24	18	16	24	18	15	22	36	16	30	16	11	9	18	14	0	1	6	0	12	1	0	3	4
CH62	C1.9	001_500ug CBD	35	25	28	32	21	14	2	19	7	4	9	18	30	27	29	36	36	34	20	22	34	23	12	30	26	22	39	23	17	27	17	9	12	6	14	22	35	16	25	25	12	2	19	9	2	3	5
CH63	C1.10	001_500ug CBD	28	3	12	22	27	16	29	16	8	10	19	16	18	32	22	23	21	17	25	40	26	21	19	23	14	13	10	23	21	17	17	18	3	12	33	19	15	2	7	15	20	13	3	4	2	0	3
CH64	A1.11	003_1000 ug CBD	20	0	13	18	3	0	2	6	0	0	0	0	0	0	0	0	3	0	0	0	0	0	0	0	0	0	0	0	0	0	0	0	0	0	0	0	0	0	0	0	0	0	0	0	0	0	0
CH65	A1.12	003_1000 ug CBD	45	27	11	17	25	21	18	29	7	15	14	43	6	8	16	28	49	32	52	65	29	60	49	54	23	63	64	76	133	53	69	80	91	74	111	111	131	139	142	127	85	137	144	61	103	54	116
CH66	A1.13	003_1000 ug CBD	35	13	40	26	38	20	16	15	4	11	9	13	15	8	24	24	23	35	47	60	39	16	36	13	30	27	30	5	36	10	47	40	21	35	13	27	12	29	61	41	51	45	69	48	108	40	10
CH67	A1.14	003_1000 ug CBD	44	16	37	38	46	40	29	17	15	2	21	11	7	35	24	21	48	50	73	51	54	16	26	58	39	19	26	41	39	65	23	29	40	21	30	48	46	55	58	36	56	75	69	116	86	61	50
CH70	B1.10	002_750 ug CBD	40	28	25	38	24	17	34	33	27	60	36	13	13	3	8	7	3	23	6	8	0	0	0	0	0	0	0	0	0	0	0	0	0	0	0	0	0	0	0	0	0	0	0	0	0	0	0
CH71	B1.11	002_750 ug CBD	49	37	26	28	64	32	22	17	11	9	35	32	57	36	50	75	55	33	45	42	26	39	68	75	25	85	42	36	58	83	38	89	58	32	63	44	42	71	43	37	56	22	6	70	7	18	2
CH72	B1.12	002_750 ug CBD	56	12	16	24	42	28	33	26	5	12	22	37	29	26	30	25	42	19	20	30	20	24	10	18	21	18	48	36	16	11	22	23	61	41	30	20	31	27	10	20	31	26	78	37	31	12	29
CH73	B1.13	002_750 ug CBD	82	56	46	82	108	124	117	108	34	65	40	43	89	42	46	29	73	57	55	41	50	81	47	49	24	53	190	143	53	140	83	65	54	89	91	106	132	89	114	29	37	50	105	54	46	96	83
CH76	C1.11	001_500ug CBD	65	36	42	61	40	34	19	14	24	42	21	40	91	37	65	84	75	38	74	66	40	66	51	44	65	31	57	38	47	20	45	93	125	88	120	110	135	87	83	114	113	81	70	74	64	95	76
CH77	C1.12	001_500ug CBD	92	52	35	22	30	36	18	26	38	19	39	32	18	84	43	76	61	42	44	43	46	76	40	48	54	29	27	19	30	32	52	33	14	54	40	65	33	35	43	17	25	25	0	12	20	6	2
CH78	C1.13	001_500ug CBD	42	47	54	22	53	24	23	30	32	17	31	41	62	58	58	81	52	34	55	36	42	37	54	55	39	46	39	30	31	29	41	39	27	10	41	42	53	44	52	22	13	16	46	10	4	9	8
CH79	C1.14	001_500ug CBD	8	2	8	8	7	4	6	5	4	7	7	16	10	18	11	13	12	6	22	14	20	11	12	11	10	17	31	14	13	17	28	24	17	21	37	33	23	26	25	16	23	50	76	27	30	34	43
CH81	A1.15	003_1000 ug CBD	30	31	23	24	33	16	19	38	20	51	20	25	67	66	42	50	77	58	77	79	74	51	34	4	21	22	46	1	0	0	0	0	0	1	1	0	0	0	0	0	0	0	0	0	0	0	0
CH82	A1.16	003_1000 ug CBD	1	1	6	1	2	0	0	3	2	0	1	2	4	2	5	5	5	3	11	11	5	8	8	4	3	6	16	10	11	1	0	4	6	1	11	5	4	8	4	12	28	39	19	15	33	48	48
CH87	B1.14	002_750 ug CBD	56	53	34	32	71	65	34	40	35	88	77	115	78	64	87	84	83	120	102	118	64	126	97	72	82	87	131	162	152	97	141	158	59	91	79	73	84	103	91	126	195	159	103	146	135	104	32
CH88	B1.15	002_750 ug CBD	24	4	11	11	19	18	16	10	6	9	9	12	17	15	10	10	21	38	37	22	30	16	17	22	21	26	53	82	38	32	55	33	52	39	53	25	60	63	57	80	101	97	118	140	155	170	157
CH93	C1.15	001_500ug CBD	59	36	47	26	43	21	26	30	38	81	50	73	63	82	67	35	42	18	76	54	44	78	47	44	44	32	50	40	32	41	50	37	65	47	63	64	48	42	78	116	94	61	88	112	121	29	91
CH94	C1.16	001_500ug CBD	1	0	0	0	0	0	0	0	0	1	0	0	0	0	0	0	0	0	0	0	0	0	0	0	0	0	0	0	0	0	1	0	0	0	0	1	11	16	11	9	5	2	1	3	3	1	0
CH113	A2.0	000_Emulsion Control	47	37	66	93	122	105	68	113	117	88	111	90	74	103	95	60	45	30	37	42	45	16	11	16	7	5	0	0	0	0	10	0	0	3	0	3	0	16	2	15	3	9	10	5	10	26	31
CH114	A2.1	000_Emulsion Control	62	76	72	49	84	98	107	101	80	102	99	126	108	114	110	124	79	75	63	66	63	50	46	41	27	36	71	61	25	35	30	54	135	55	1	4	0	0	1	2	1	10	11	7	18	26	34
CH115	A2.2	000_Emulsion Control	47	51	69	89	82	77	99	59	67	85	72	62	56	50	45	64	76	48	50	71	45	78	89	79	103	45	83	107	70	34	40	25	12	15	17	55	209	169	121	162	167	129	121	90	34	84	36
CH118	B2.0	003_1000 ug CBD	60	0	0	0	0	0	0	0	0	0	0	0	0	0	0	0	0	0	0	0	0	0	0	0	0	0	0	0	0	0	0	0	0	0	0	0	0	0	0	0	0	0	0	0	0	0	0
CH119	B2.1	003_1000 ug CBD	31	35	38	44	28	22	24	9	16	0	22	42	42	50	9	36	55	25	37	25	12	38	59	67	92	37	28	27	8	1	24	4	28	6	8	0	0	41	21	26	25	0	4	0	1	2	14
CH120	B2.2	003_1000 ug CBD	17	18	11	19	22	27	34	20	24	12	2	13	33	54	49	23	101	65	23	16	16	4	12	0	8	0	24	3	0	4	6	5	29	10	13	0	8	11	88	49	25	74	33	8	20	42	5
CH121	B2.3	003_1000 ug CBD	8	2	6	4	6	11	19	8	3	1	0	0	2	3	5	4	10	4	5	3	9	14	8	3	2	1	9	24	10	1	5	7	7	12	28	10	9	6	37	14	9	3	4	5	6	11	7
CH124	C2.0	002_750 ug CBD	31	0	0	0	0	0	0	0	0	0	0	0	0	0	0	0	0	0	0	0	0	0	0	0	0	0	0	0	0	0	0	0	0	0	0	0	0	0	0	0	0	0	0	0	0	0	0
CH125	C2.1	002_750 ug CBD	41	6	15	25	21	11	24	24	3	36	45	26	5	16	46	32	31	47	28	23	21	6	35	16	22	24	5	2	7	12	12	8	5	7	78	13	24	13	4	28	54	27	18	34	13	12	0
CH126	C2.2	002_750 ug CBD	20	30	17	16	11	26	16	13	2	5	3	17	37	22	7	0	2	27	14	26	18	50	41	36	12	4	20	19	6	3	0	6	8	0	6	10	10	9	8	0	13	4	14	16	9	47	37
CH128	A2.3	000_Emulsion Control	26	36	62	59	102	82	102	67	62	72	88	100	96	83	80	68	72	56	69	41	34	52	22	31	16	5	14	11	4	4	6	2	0	6	0	1	0	0	3	0	2	1	8	12	10	18	29
CH129	A2.4	000_Emulsion Control	51	54	61	74	40	93	81	92	89	90	96	104	118	103	106	92	76	87	74	67	63	49	30	49	62	43	36	17	38	14	15	5	3	3	0	0	0	3	0	0	1	6	11	7	5	13	59
CH130	A2.5	000_Emulsion Control	96	65	74	71	101	110	101	125	118	137	162	157	178	147	148	141	129	118	90	82	100	105	95	65	119	41	24	37	143	31	17	7	2	14	64	149	69	4	9	13	0	4	16	31	28	29	26
CH131	A2.6	000_Emulsion Control	69	66	88	106	111	99	111	105	123	116	109	98	104	102	97	100	104	77	100	73	95	100	66	59	117	70	53	51	26	31	15	13	9	5	11	0	3	0	1	2	1	15	23	43	72	96	70
CH132	A2.7	000_Emulsion Control	1	0	1	0	0	0	0	0	0	0	0	0	0	0	0	0	0	0	0	0	0	0	0	0	0	0	0	0	0	0	0	0	0	0	0	0	0	0	0	0	0	0	0	0	0	0	0
CH134	B2.4	003_1000 ug CBD	28	23	10	12	11	10	9	14	6	44	38	10	27	57	24	21	28	33	75	42	40	39	78	69	38	75	49	28	58	45	58	50	30	43	40	95	84	111	72	100	64	115	37	24	97	33	87
CH135	B2.5	003_1000 ug CBD	41	29	36	23	10	19	10	14	18	3	5	9	14	6	18	10	15	15	19	27	24	39	26	31	13	38	29	29	20	19	15	34	29	29	12	35	15	12	5	9	18	19	10	1	29	15	6
CH136	B2.6	003_1000 ug CBD	62	32	38	26	7	16	7	13	0	1	3	3	16	4	19	15	12	21	17	9	31	19	17	4	31	25	9	23	22	14	2	24	10	11	5	0	3	8	25	12	7	4	34	24	10	5	11
CH137	B2.7	003_1000 ug CBD	77	34	46	27	21	30	16	33	18	13	23	22	11	14	13	16	15	70	19	17	14	22	28	31	28	22	20	20	41	17	56	17	11	30	27	34	33	13	13	27	9	11	23	2	8	4	11
CH139	C2.3	002_750 ug CBD	25	48	45	55	43	54	50	33	43	26	17	36	53	32	40	39	62	62	62	42	48	69	80	58	80	70	113	74	31	32	19	38	54	98	86	43	42	48	24	49	62	29	28	4	11	39	30
CH140	C2.4	002_750 ug CBD	58	34	20	25	16	29	17	20	8	28	19	7	42	7	26	22	32	35	51	29	57	58	52	60	34	37	57	9	18	23	93	33	17	52	33	86	16	52	38	9	16	37	17	52	12	85	72
CH141	C2.5	002_750 ug CBD	67	22	35	21	16	12	2	16	1	4	6	4	6	15	15	8	35	33	38	21	27	21	38	17	27	21	39	61	18	26	19	3	19	15	47	30	11	10	31	28	16	1	0	6	1	0	2
CH142	C2.6	002_750 ug CBD	34	12	17	11	24	32	14	19	5	20	13	30	3	40	34	40	56	10	35	36	37	25	76	35	32	15	14	26	45	6	36	3	20	4	15	34	40	6	13	54	50	20	75	1	7	7	9
CH143	C2.7	002_750 ug CBD	33	10	13	15	16	18	5	15	11	4	13	13	19	11	17	31	17	19	10	16	11	19	20	30	25	15	51	33	17	22	19	5	5	9	20	45	54	26	29	30	18	38	18	30	9	6	29
CH144	A2.8	000_Emulsion Control	31	34	46	76	104	93	67	55	88	79	82	76	82	77	78	58	55	63	50	51	50	41	25	15	22	36	35	48	94	49	13	8	67	103	14	8	11	11	13	5	15	3	12	10	17	32	37
CH145	A2.9	000_Emulsion Control	52	58	59	41	71	86	89	95	97	113	104	127	136	143	121	116	76	84	76	71	65	53	30	22	22	25	29	31	25	15	8	13	198	190	42	10	0	10	2	1	9	4	18	20	17	28	53
CH146	A2.10	000_Emulsion Control	48	34	59	48	68	79	80	87	103	114	107	95	113	123	127	109	112	73	85	65	71	54	51	36	38	40	55	29	18	7	11	19	9	7	5	1	1	3	2	4	2	1	36	20	50	56	67
CH147	A2.11	000_Emulsion Control	92	105	145	139	130	133	148	167	166	152	142	139	157	152	133	112	113	131	143	105	114	116	106	103	111	76	70	69	131	102	94	100	86	60	60	21	7	0	3	5	6	13	48	110	124	127	146
CH148	A2.12	000_Emulsion Control	3	0	1	2	0	0	1	6	2	2	0	0	0	0	0	0	0	0	0	0	0	0	0	0	0	0	0	0	0	0	0	0	0	0	0	0	0	0	0	0	0	0	0	0	0	0	0
CH150	B2.8	003_1000 ug CBD	36	13	5	10	26	25	8	14	12	0	21	17	6	8	12	35	7	35	15	42	52	39	37	31	25	55	35	35	48	20	21	17	65	39	55	26	41	39	32	18	28	30	71	74	70	37	33
CH151	B2.9	003_1000 ug CBD	66	19	13	44	25	3	14	36	7	18	13	14	24	25	26	28	25	12	27	33	31	21	17	24	12	14	11	20	6	18	8	20	32	27	21	42	18	10	33	27	30	50	53	33	11	18	37
CH152	B2.10	003_1000 ug CBD	90	44	51	82	56	36	24	35	19	12	10	19	13	17	41	41	71	47	88	71	48	60	67	50	23	78	68	48	18	17	17	24	39	34	14	37	48	43	46	61	40	29	8	27	3	3	29
CH153	B2.11	003_1000 ug CBD	84	28	37	32	30	43	31	32	34	46	28	56	47	50	62	35	36	33	34	34	54	45	60	11	24	32	13	21	64	30	59	51	21	30	56	69	39	35	75	39	28	48	17	21	35	30	56
CH155	C2.8	002_750 ug CBD	52	56	70	67	95	59	70	70	70	104	30	61	102	96	78	43	152	105	102	177	171	106	144	117	184	179	166	192	163	186	129	49	71	152	95	83	96	58	55	120	107	46	18	45	104	120	41
CH156	C2.9	002_750 ug CBD	28	11	7	16	13	14	5	4	4	3	3	7	8	4	4	33	22	11	17	24	17	18	18	15	19	19	34	42	26	21	3	9	12	21	28	11	44	60	34	23	27	25	17	35	55	6	20
CH157	C2.10	002_750 ug CBD	63	26	13	36	34	47	42	30	22	32	29	9	10	4	37	48	20	42	25	22	25	46	26	6	48	33	48	37	55	10	7	13	25	32	13	10	31	31	18	14	9	18	16	12	35	54	45
CH158	C2.11	002_750 ug CBD	73	26	37	15	51	25	19	15	5	23	26	53	37	18	54	52	45	37	40	29	59	59	34	55	38	14	19	17	33	36	32	20	29	14	70	64	8	11	2	39	52	1	48	34	22	44	27
CH159	C2.12	002_750 ug CBD	63	30	51	46	72	98	79	42	53	4	43	82	52	64	56	74	39	57	43	37	41	34	44	58	49	64	87	43	47	59	63	71	98	36	36	68	66	31	24	14	41	81	41	47	72	22	53
CH160	A2.13	000_Emulsion Control	35	33	95	101	78	59	89	79	65	55	61	61	79	56	74	63	75	71	68	79	85	88	91	139	153	130	108	47	52	22	21	23	4	5	4	21	29	15	30	14	1	2	9	10	16	38	28
CH161	A2.14	000_Emulsion Control	29	43	45	58	62	88	97	94	110	112	93	121	92	95	93	98	99	95	68	56	68	65	36	39	29	15	35	20	20	7	25	8	6	6	1	5	4	4	1	4	3	2	6	9	30	35	45
CH162	A2.15	000_Emulsion Control	34	46	48	76	100	85	100	152	136	137	118	97	94	108	104	79	102	97	72	90	78	47	66	54	47	17	29	27	19	7	17	13	5	1	4	2	0	0	2	4	4	13	34	45	62	53	90
CH163	A2.16	000_Emulsion Control	95	76	78	122	92	95	98	74	60	64	46	49	57	59	43	69	59	52	71	67	76	46	48	72	49	52	89	66	57	61	100	97	116	79	107	117	193	102	53	30	64	112	164	199	168	187	165
CH166	B2.12	003_1000 ug CBD	27	8	23	20	16	28	37	12	4	30	5	4	22	14	16	26	25	33	63	31	25	53	52	49	44	53	51	59	17	46	14	42	17	73	10	100	76	49	50	40	70	153	82	49	28	40	18
CH167	B2.13	003_1000 ug CBD	51	17	20	27	41	39	40	47	43	21	15	67	29	30	11	56	49	48	33	48	29	65	22	36	24	34	43	50	10	31	60	59	66	17	80	113	76	24	24	33	32	45	54	68	70	69	21
CH168	B2.14	003_1000 ug CBD	34	1	15	27	24	12	9	8	5	1	2	5	7	11	15	24	19	21	19	25	9	13	23	26	32	34	27	27	22	24	12	17	11	12	32	9	54	80	26	15	23	31	13	7	15	19	39
CH169	B2.15	003_1000 ug CBD	25	4	3	8	12	4	6	7	0	1	5	2	15	13	28	15	17	16	15	40	14	11	16	22	25	31	24	14	28	37	77	27	56	34	23	42	51	33	22	34	38	89	93	101	85	78	68
CH172	C2.13	002_750 ug CBD	100	45	40	79	50	38	35	19	32	42	38	52	78	37	31	44	73	56	77	54	62	59	26	99	51	50	101	105	43	67	79	70	85	87	57	71	75	60	101	140	86	62	124	218	216	217	171
CH173	C2.14	002_750 ug CBD	75	50	17	44	35	35	25	19	8	18	11	26	48	43	50	75	51	68	37	73	42	4	17	14	31	61	62	55	24	18	40	23	39	18	14	25	45	11	20	25	24	16	14	24	20	13	2
CH174	C2.15	002_750 ug CBD	22	4	14	19	9	16	18	15	13	6	2	6	19	12	23	26	14	20	18	12	10	24	21	19	16	18	22	15	21	19	26	12	18	23	18	24	24	13	29	37	20	1	21	9	5	4	2
CH175	C2.16	002_750 ug CBD	6	3	5	4	1	3	2	4	1	0	0	0	2	3	6	8	5	6	4	18	6	8	15	20	7	8	10	13	12	14	12	7	13	26	18	18	22	11	15	9	25	30	22	16	16	12	11
CH208	A3.0	001_500ug CBD	29	29	24	7	26	21	20	30	19	20	24	38	36	22	37	54	65	52	46	56	78	69	56	86	149	89	154	118	66	66	113	151	79	124	95	61	119	92	62	12	27	15	18	11	5	6	20
CH209	A3.1	001_500ug CBD	39	13	23	24	34	20	24	10	4	39	35	34	31	42	20	43	40	23	26	63	24	18	51	54	36	35	25	20	7	24	33	29	78	40	22	30	40	64	104	89	92	61	21	21	17	23	6
CH210	A3.2	001_500ug CBD	39	7	24	29	33	11	19	39	15	53	29	32	50	46	46	20	39	26	53	44	37	22	28	14	22	44	22	26	54	8	24	4	15	0	15	41	17	8	17	48	102	62	10	15	22	6	2
CH211	A3.3	001_500ug CBD	21	21	30	20	24	30	35	33	15	18	25	38	38	37	14	28	35	26	33	48	29	18	32	21	20	10	37	29	36	58	58	15	53	61	67	50	27	32	38	111	61	33	107	36	4	13	12
CH214	B3.0	000_Emulsion Control	18	54	66	78	64	74	96	90	107	108	99	109	111	106	113	124	105	99	88	118	83	82	116	101	100	104	144	90	128	51	42	29	36	21	41	2	16	16	10	0	9	4	8	4	11	24	26
CH215	B3.1	000_Emulsion Control	58	50	54	33	50	58	72	81	82	95	102	110	100	111	93	115	75	84	72	88	59	58	45	66	39	37	22	30	27	11	22	5	11	4	12	0	0	6	0	4	13	4	7	11	15	21	26
CH216	B3.2	000_Emulsion Control	80	53	77	70	80	61	82	84	93	93	103	90	91	93	78	80	103	106	91	44	53	57	57	125	36	29	28	35	7	14	4	6	20	137	64	32	0	0	2	2	6	7	4	6	7	11	25
CH217	B3.3	000_Emulsion Control	74	84	88	109	96	81	92	89	71	78	74	57	67	67	77	58	88	55	68	87	77	73	68	90	85	47	134	175	143	107	58	44	55	102	111	117	66	32	56	49	4	9	9	12	23	25	37
CH220	C3.0	003_1000 ug CBD	65	40	53	34	47	49	84	35	11	28	25	29	0	19	12	32	20	33	75	14	32	19	29	68	53	14	9	18	46	10	32	27	73	22	86	25	50	39	24	60	155	119	17	0	3	10	23
CH221	C3.1	003_1000 ug CBD	79	11	19	19	33	10	8	26	14	15	12	17	18	3	27	34	31	36	58	24	33	18	29	12	45	23	12	44	49	15	10	9	23	25	50	17	6	5	11	42	24	61	1	18	23	10	34
CH222	C3.2	003_1000 ug CBD	71	19	14	17	29	32	11	37	6	0	16	30	34	9	29	45	27	6	24	14	21	9	8	15	2	0	8	3	4	5	22	0	0	6	10	0	3	9	41	81	5	8	20	22	10	55	22
CH223	C3.3	003_1000 ug CBD	52	82	58	42	26	41	27	24	12	2	3	4	1	36	30	53	0	75	2	15	22	17	7	13	24	29	12	2	2	21	8	8	13	5	47	4	8	76	57	7	28	25	0	13	16	32	53
CH224	A3.4	001_500ug CBD	47	55	38	33	65	55	18	55	35	4	0	20	9	60	65	57	97	54	38	23	21	33	21	37	0	29	62	49	94	82	80	128	43	1	0	26	18	7	2	6	6	15	0	0	0	2	4
CH225	A3.5	001_500ug CBD	59	29	38	69	50	31	25	17	17	8	30	33	23	26	42	38	84	56	43	54	44	46	64	21	42	2	10	25	7	16	14	18	35	6	8	28	41	29	11	2	8	23	0	3	8	4	17
CH226	A3.6	001_500ug CBD	74	61	51	40	36	20	45	10	61	9	29	34	80	103	66	91	59	59	39	58	41	11	13	25	13	24	28	61	31	63	74	131	60	95	31	25	71	76	53	18	2	62	2	6	16	7	39
CH227	A3.7	001_500ug CBD	25	2	21	20	22	13	3	17	10	13	27	33	30	26	33	22	24	11	8	8	9	8	14	22	24	17	3	5	7	14	16	9	5	24	33	8	11	15	0	3	10	3	8	12	0	4	5
CH228	A3.8	001_500ug CBD	15	3	5	1	9	1	1	3	0	1	3	1	0	1	0	1	0	0	1	1	1	0	0	0	0	2	0	0	1	0	0	0	1	0	0	1	1	2	0	0	0	0	0	0	1	0	0
CH230	B3.4	000_Emulsion Control	37	49	61	42	32	52	70	91	93	111	129	135	134	139	128	112	106	80	92	79	107	104	39	69	80	42	61	65	87	59	57	67	92	187	55	8	9	5	0	0	3	3	11	35	64	2	16
CH231	B3.5	000_Emulsion Control	62	48	53	29	47	64	79	69	65	82	82	81	74	91	82	67	68	45	43	67	42	34	30	36	34	38	29	34	17	7	11	6	9	9	4	6	1	0	3	1	5	5	10	5	3	14	21
CH232	B3.6	000_Emulsion Control	79	70	50	76	65	72	87	74	94	110	96	98	77	63	80	67	49	73	66	67	64	63	33	43	80	37	26	13	5	14	10	11	2	2	0	0	0	0	0	0	0	1	9	24	18	16	34
CH233	B3.7	000_Emulsion Control	105	103	150	136	151	113	123	99	76	87	78	77	84	54	63	68	80	75	77	73	92	94	60	54	55	26	43	44	32	12	23	10	19	6	27	33	5	0	4	0	1	6	25	19	36	48	83
CH235	C3.4	003_1000 ug CBD	47	28	23	13	34	17	18	51	104	60	11	15	40	16	41	26	42	52	54	65	45	39	32	100	64	76	84	44	85	74	37	51	69	91	116	68	69	31	45	12	14	12	12	14	19	13	8
CH236	C3.5	003_1000 ug CBD	76	28	34	20	88	51	26	38	21	56	35	37	28	38	3	39	34	27	45	28	50	54	50	27	22	47	53	24	11	29	30	54	45	65	34	25	56	66	32	68	49	58	38	20	30	81	49
CH237	C3.6	003_1000 ug CBD	40	2	16	21	8	14	2	16	9	10	8	31	14	18	5	5	4	11	34	28	18	16	18	30	13	18	30	26	4	10	57	47	36	14	5	6	12	0	11	16	9	9	11	8	3	7	2
CH238	C3.7	003_1000 ug CBD	78	26	39	29	16	23	21	30	7	3	6	1	10	7	42	46	10	19	22	35	21	30	16	13	31	64	21	17	43	2	9	32	16	14	8	3	26	41	5	48	7	8	21	20	36	72	4
CH239	C3.8	003_1000 ug CBD	18	0	10	14	5	10	10	12	8	4	18	12	27	5	6	23	9	10	8	16	11	36	9	24	8	14	30	19	9	20	15	16	7	16	2	34	46	23	71	37	25	23	16	24	6	16	14
CH240	A3.9	001_500ug CBD	41	45	32	60	41	43	56	31	31	52	65	60	56	73	57	61	64	64	61	93	99	76	50	65	82	96	95	49	44	56	42	25	75	81	34	32	90	43	46	2	19	94	64	0	3	8	15
CH241	A3.10	001_500ug CBD	37	21	21	31	33	16	23	15	14	10	3	19	32	23	29	29	35	26	16	6	12	34	14	24	57	34	25	20	18	11	24	0	33	49	52	45	81	34	61	29	9	16	4	1	4	7	7
CH242	A3.11	001_500ug CBD	19	4	4	10	10	20	5	5	7	11	12	23	26	9	23	37	18	15	23	21	18	9	16	57	42	32	50	34	19	31	41	63	29	17	19	20	21	14	0	12	2	1	10	2	5	11	2
CH243	A3.12	001_500ug CBD	36	9	42	29	12	25	15	43	26	18	32	20	50	38	39	21	18	38	26	39	23	20	37	44	60	37	52	82	60	53	66	39	21	67	83	33	16	34	49	32	11	28	34	24	9	20	13
CH244	A3.13	001_500ug CBD	0	0	0	0	0	0	0	0	0	0	0	0	0	0	0	0	0	0	0	0	0	0	0	0	0	0	0	0	0	0	0	0	0	0	0	0	0	0	0	0	0	0	0	0	0	0	0
CH246	B3.8	000_Emulsion Control	51	57	53	51	66	61	76	93	113	92	101	115	107	98	92	98	102	90	85	89	85	68	62	55	124	104	121	107	70	65	76	56	39	59	15	33	118	116	89	182	164	151	206	240	199	49	39
CH247	B3.9	000_Emulsion Control	37	30	49	35	62	50	84	73	98	100	97	103	88	90	99	71	70	60	48	49	69	53	49	31	31	27	23	17	7	20	10	8	16	0	0	0	0	1	5	0	0	14	14	7	15	25	20
CH248	B3.10	000_Emulsion Control	44	42	48	45	50	73	58	53	48	57	51	41	37	39	39	50	43	43	46	43	37	33	20	29	35	26	48	25	12	14	11	4	4	2	4	11	18	2	3	5	3	10	7	14	17	29	50
CH249	B3.11	000_Emulsion Control	83	83	138	156	140	154	155	111	113	117	104	71	87	65	82	71	97	98	88	70	98	87	72	85	83	71	68	56	65	63	79	66	68	62	27	32	13	16	6	18	28	28	56	140	174	173	180
CH251	C3.9	003_1000 ug CBD	42	17	23	29	31	43	20	8	16	13	72	63	14	47	25	25	30	59	45	77	75	65	61	91	98	109	136	102	90	127	90	76	91	38	35	20	30	20	21	27	50	27	81	66	11	12	11
CH252	C3.10	003_1000 ug CBD	64	45	32	36	46	56	30	26	18	67	48	13	35	48	43	67	34	31	77	57	33	47	43	20	46	56	31	12	25	72	44	23	54	7	27	37	52	63	87	85	86	75	20	44	47	63	70
CH253	C3.11	003_1000 ug CBD	54	11	6	9	15	13	9	12	11	8	7	8	1	3	5	3	10	3	11	11	7	24	9	8	15	11	14	5	11	26	20	12	18	7	7	5	8	7	1	15	3	13	17	9	10	3	7
CH254	C3.12	003_1000 ug CBD	39	9	16	24	38	32	15	22	13	9	17	9	15	13	30	13	60	55	25	56	79	41	27	30	43	19	36	15	45	22	35	65	35	18	45	30	18	35	2	0	33	26	58	24	51	63	33
CH255	C3.13	003_1000 ug CBD	37	7	25	32	20	34	27	26	8	17	13	14	26	19	16	10	14	16	44	39	38	33	22	48	27	36	64	32	12	21	65	40	56	33	17	67	28	29	15	52	46	36	44	5	40	51	31
CH257	A3.14	001_500ug CBD	23	13	33	56	33	19	29	21	11	50	45	67	41	43	45	33	67	40	74	53	36	33	64	30	30	48	38	35	33	55	70	65	68	38	24	64	28	74	25	57	76	93	93	133	137	138	133
CH258	A3.15	001_500ug CBD	38	16	14	19	21	30	29	28	33	61	28	41	35	61	21	36	33	49	41	18	63	22	35	53	44	36	53	36	30	6	114	82	36	37	16	41	41	40	51	27	11	43	8	11	23	26	31
CH259	A3.16	001_500ug CBD	34	9	16	10	24	32	10	25	19	28	42	36	36	47	30	40	35	35	39	45	47	71	32	60	61	75	77	90	138	123	83	114	147	114	88	105	153	78	61	99	54	131	172	133	164	109	71
CH262	B3.12	000_Emulsion Control	45	35	57	79	94	90	95	66	91	105	91	85	102	94	86	104	87	79	62	104	136	66	45	75	114	116	70	32	56	54	62	19	21	95	18	22	30	0	10	10	4	8	13	10	32	37	21
CH263	B3.13	000_Emulsion Control	26	44	97	65	84	71	103	85	104	91	89	78	103	85	82	93	82	82	81	62	69	39	60	39	52	41	47	33	24	43	23	16	6	8	20	6	2	2	0	2	0	8	13	19	33	36	60
CH264	B3.14	000_Emulsion Control	35	29	43	68	68	91	97	63	64	74	82	55	66	55	29	47	52	49	51	54	45	54	35	35	22	16	40	32	27	7	29	24	19	64	17	21	32	2	3	7	29	68	65	42	60	61	73
CH265	B3.15	000_Emulsion Control	7	17	29	48	42	62	50	49	37	47	42	21	25	27	18	38	33	32	31	49	41	43	41	33	43	37	38	35	42	21	51	56	30	28	48	30	16	42	40	55	43	35	46	64	96	115	147
CH268	C3.14	003_1000 ug CBD	76	85	58	32	9	38	52	96	88	11	28	97	64	29	18	53	57	52	76	107	83	107	24	98	97	92	151	86	106	81	71	116	168	141	95	199	178	108	136	86	104	63	52	40	75	72	106
CH269	C3.15	003_1000 ug CBD	66	34	43	54	65	31	41	15	9	18	12	25	24	40	73	23	22	53	86	47	37	60	57	93	41	30	71	38	88	29	44	54	60	84	132	42	109	89	35	25	56	28	38	32	8	36	16
CH270	C3.16	003_1000 ug CBD	88	73	38	98	15	61	66	42	29	46	20	38	33	15	28	33	37	30	44	53	54	54	95	87	74	67	97	71	58	80	33	48	88	64	66	140	182	51	48	50	46	53	75	70	101	132	103
CH289	A4.0	002_750 ug CBD	3	0	2	1	3	3	1	3	0	1	3	7	2	10	9	17	11	15	30	12	15	23	20	14	14	11	12	14	24	21	6	22	11	10	15	19	16	14	15	4	8	10	3	25	21	26	18
CH290	A4.1	002_750 ug CBD	48	48	87	92	69	11	24	61	26	31	71	18	48	60	27	95	65	111	52	24	107	58	12	21	29	61	48	26	10	9	67	66	5	5	11	77	21	37	43	91	17	68	126	62	68	24	2
CH295	B4.0	001_500ug CBD	24	46	60	53	44	34	40	22	23	19	40	52	45	48	85	94	64	65	92	113	96	119	70	65	67	117	93	62	49	58	104	56	119	67	70	67	71	43	43	58	11	41	24	27	13	0	6
CH296	B4.1	001_500ug CBD	80	157	87	126	105	62	43	83	90	44	53	53	60	64	20	65	71	90	42	28	56	55	57	31	30	87	40	28	77	107	150	90	16	65	28	25	31	28	10	29	10	11	0	0	0	0	0
CH301	C4.0	000_Emulsion Control	87	101	102	56	65	51	88	57	50	60	77	71	55	66	66	41	48	51	57	32	41	42	38	38	63	51	51	27	33	43	81	145	49	12	17	10	4	0	0	0	0	0	7	8	17	20	13
CH302	C4.1	000_Emulsion Control	14	20	51	48	33	32	32	31	28	33	44	47	39	53	46	44	36	38	16	36	22	29	47	45	21	41	30	39	27	20	38	101	35	13	21	0	0	3	21	3	2	1	3	6	9	28	31
CH304	A4.2	002_750 ug CBD	57	11	39	65	50	14	39	26	27	8	15	65	31	44	37	18	30	35	43	88	53	29	50	75	72	67	71	81	60	40	50	115	112	129	104	140	131	133	51	148	135	125	119	82	58	43	42
CH305	A4.3	002_750 ug CBD	29	6	3	23	10	10	25	16	3	24	37	15	62	29	33	43	43	70	78	58	56	20	68	55	87	24	67	89	78	57	83	60	22	31	38	13	54	29	3	22	43	61	64	75	26	68	72
CH306	A4.4	002_750 ug CBD	34	9	32	55	36	44	16	19	11	24	14	18	14	22	39	50	46	36	34	35	9	33	40	6	26	33	12	31	13	10	14	62	56	50	125	61	53	36	18	29	11	25	18	13	0	2	26
CH307	A4.5	002_750 ug CBD	49	61	14	38	55	44	30	33	28	42	65	42	47	53	53	51	51	35	31	67	12	26	31	15	45	62	83	29	38	7	106	81	42	50	30	36	66	100	61	3	24	6	3	19	7	11	44
CH310	B4.2	001_500ug CBD	60	12	18	47	69	26	28	34	15	60	40	84	50	63	74	77	48	81	78	85	49	80	62	46	123	119	147	170	113	126	161	103	162	132	86	124	128	100	62	83	26	47	85	117	64	74	10
CH311	B4.3	001_500ug CBD	46	18	36	32	48	48	19	10	34	23	35	69	24	60	34	67	66	60	83	72	47	106	67	37	36	45	43	38	105	55	22	26	50	36	40	74	51	89	68	132	70	53	17	37	43	57	46
CH312	B4.4	001_500ug CBD	69	61	41	64	73	55	69	40	74	41	59	35	56	60	67	52	33	69	34	30	26	89	49	42	78	41	36	28	94	36	65	2	52	72	52	81	113	23	25	7	4	3	0	9	8	7	8
CH313	B4.5	001_500ug CBD	82	73	97	69	88	106	124	123	149	121	103	77	62	95	97	121	109	105	56	61	72	40	67	110	99	107	155	78	131	103	32	123	95	27	53	56	24	34	35	39	1	33	73	11	97	50	33
CH316	C4.2	000_Emulsion Control	86	96	46	34	46	51	58	44	52	45	77	85	83	66	89	88	88	60	74	72	55	51	55	34	26	17	29	12	6	8	6	3	20	7	3	4	1	0	0	0	0	2	2	6	6	4	17
CH317	C4.3	000_Emulsion Control	52	59	31	40	34	51	52	43	54	65	47	59	60	60	51	46	58	46	53	29	23	17	13	27	16	28	17	12	12	2	2	15	7	2	6	1	1	0	0	4	1	1	0	4	7	19	30
CH318	C4.4	000_Emulsion Control	70	72	91	95	118	100	126	119	117	145	111	109	97	107	113	125	99	129	81	58	55	62	54	52	22	14	33	17	14	13	7	12	3	10	9	4	2	0	0	2	0	0	4	6	2	13	24
CH319	C4.5	000_Emulsion Control	45	85	176	192	161	159	161	140	164	157	172	142	150	141	130	161	111	138	82	169	120	115	123	197	78	53	38	41	91	146	61	24	85	142	30	6	12	2	3	2	1	3	4	16	16	40	33
CH320	A4.6	002_750 ug CBD	42	25	22	4	25	10	20	11	7	4	11	37	13	14	19	21	4	36	11	14	16	4	29	19	4	14	25	6	6	7	5	19	34	26	2	14	2	0	13	3	16	54	6	3	13	1	0
CH321	A4.7	002_750 ug CBD	30	11	18	20	23	17	4	9	7	4	0	1	3	4	7	9	7	6	5	11	20	4	17	7	8	13	9	2	2	2	10	4	1	0	8	1	7	3	6	0	1	13	13	4	11	7	6
CH322	A4.8	002_750 ug CBD	56	56	21	11	36	44	24	12	7	4	17	25	3	4	36	27	18	17	25	28	13	49	32	16	11	24	61	38	55	12	29	4	24	16	12	32	43	28	3	5	3	8	0	7	0	17	4
CH323	A4.9	002_750 ug CBD	44	6	49	37	23	16	15	16	9	3	10	8	18	32	18	21	30	25	25	15	21	18	18	37	22	9	46	40	17	36	7	15	2	10	14	15	3	7	31	32	28	10	15	46	56	111	39
CH324	A4.10	002_750 ug CBD	6	1	1	2	7	14	9	32	27	10	7	13	25	6	6	6	17	20	26	9	7	14	9	19	16	17	23	25	17	21	24	28	23	32	27	26	22	36	28	28	32	15	28	28	9	22	28
CH326	B4.6	001_500ug CBD	28	19	38	33	48	67	33	43	39	27	34	44	24	57	85	52	82	62	45	77	81	70	61	31	38	68	33	34	47	47	79	93	135	81	189	152	137	210	112	105	132	138	84	62	73	89	17
CH327	B4.7	001_500ug CBD	76	17	20	24	30	22	21	19	23	15	32	31	23	21	33	36	20	31	59	28	47	36	25	29	35	37	19	47	78	38	26	56	23	14	17	33	48	12	43	8	14	12	32	5	4	4	14
CH328	B4.8	001_500ug CBD	85	30	15	22	30	41	3	27	31	16	27	40	37	43	58	58	82	56	80	87	38	25	37	40	17	43	45	12	36	7	17	7	30	37	14	39	46	45	52	56	23	23	24	4	29	23	34
CH329	B4.9	001_500ug CBD	76	80	64	36	65	58	62	82	95	33	70	58	54	65	88	89	77	68	50	73	73	48	52	58	31	38	28	53	59	79	34	53	29	67	87	110	41	55	109	15	1	11	5	0	10	25	19
CH331	C4.6	000_Emulsion Control	37	55	87	76	65	56	65	60	43	45	75	83	65	82	80	64	58	76	91	53	81	81	69	91	120	115	134	63	49	70	37	30	19	16	43	18	16	2	1	11	44	1	5	17	8	57	76
CH332	C4.7	000_Emulsion Control	69	60	33	16	29	25	50	51	40	71	63	65	59	86	75	73	55	66	68	35	54	48	38	50	36	33	26	42	32	22	20	7	22	5	0	6	9	0	0	0	1	0	0	2	4	13	10
CH333	C4.8	000_Emulsion Control	80	49	55	44	35	48	62	62	51	89	68	81	89	94	75	94	74	56	90	99	88	69	58	78	69	80	61	104	28	37	23	11	3	5	2	0	1	0	0	0	0	1	4	0	0	11	16
CH334	C4.9	000_Emulsion Control	75	54	61	76	93	79	87	103	88	90	76	89	68	68	68	75	48	81	56	66	48	58	25	44	63	52	50	38	41	41	25	21	26	14	2	3	0	1	2	0	0	5	1	0	7	7	27
CH335	C4.10	000_Emulsion Control	31	38	92	139	145	107	109	105	97	110	83	93	87	124	95	77	126	96	89	69	70	63	55	87	62	58	68	54	35	37	49	29	18	8	14	20	9	3	2	5	3	7	8	11	14	22	57
CH336	A4.11	002_750 ug CBD	31	15	28	15	34	32	54	14	23	18	16	13	2	56	42	12	6	19	23	21	24	0	3	27	19	9	6	10	17	6	0	0	14	12	12	27	0	0	8	12	17	4	19	0	0	27	0
CH337	A4.12	002_750 ug CBD	33	8	4	23	37	14	16	31	9	13	14	1	19	27	7	13	23	14	19	11	2	6	4	2	0	9	13	34	14	6	3	5	5	16	0	0	2	2	2	0	13	4	26	6	0	2	1
CH338	A4.13	002_750 ug CBD	32	8	10	14	14	22	8	9	5	2	3	4	16	17	15	26	24	12	32	40	25	13	9	19	31	27	69	23	20	20	25	40	34	15	56	33	20	35	45	28	6	67	58	12	6	3	10
CH339	A4.14	002_750 ug CBD	46	10	18	24	39	28	5	35	18	9	23	14	44	35	32	27	22	59	34	10	27	22	44	53	7	19	47	30	20	48	45	54	84	102	52	58	26	38	27	57	63	50	58	79	20	17	23
CH342	B4.10	001_500ug CBD	31	54	44	40	32	30	19	20	27	7	8	9	70	39	22	36	58	43	31	72	15	39	57	48	57	36	54	30	48	56	51	37	56	19	77	113	56	45	53	103	16	3	22	0	28	1	2
CH343	B4.11	001_500ug CBD	35	9	29	18	23	23	9	10	6	4	16	27	16	10	12	25	43	15	28	29	19	50	60	28	11	5	10	6	2	12	15	21	31	42	51	54	73	29	39	12	4	7	13	30	0	0	1
CH344	B4.12	001_500ug CBD	42	23	31	27	27	38	10	45	17	35	33	37	29	50	20	34	63	14	51	58	33	23	16	68	45	29	34	35	40	35	24	49	28	64	31	47	35	44	77	22	17	34	68	7	10	5	4
CH345	B4.13	001_500ug CBD	55	45	42	50	51	37	5	20	18	5	21	37	47	51	39	52	53	52	45	29	32	29	40	45	53	57	79	44	27	26	37	56	43	59	25	113	76	56	10	16	23	7	9	9	4	7	20
CH348	C4.11	000_Emulsion Control	29	49	26	8	24	44	42	63	66	63	68	69	67	77	76	68	65	75	72	36	46	34	37	26	14	19	18	15	13	14	15	6	8	0	5	5	6	0	0	3	8	10	11	10	7	9	30
CH349	C4.12	000_Emulsion Control	58	65	42	45	65	75	59	86	62	78	70	79	93	68	76	85	79	68	90	61	71	78	57	43	39	35	49	39	12	25	33	9	12	2	6	6	0	0	0	0	0	1	1	3	5	7	33
CH350	C4.13	000_Emulsion Control	78	82	81	67	86	102	106	100	95	104	129	126	126	142	128	125	137	142	113	101	118	116	107	123	125	94	119	117	87	96	48	42	27	16	16	16	9	36	1	0	2	0	19	19	36	45	48
CH351	C4.14	000_Emulsion Control	28	43	75	96	115	126	127	107	121	114	108	94	99	113	91	116	97	94	91	115	109	106	114	98	93	118	127	121	113	119	110	94	90	122	106	118	87	75	127	42	67	37	66	64	113	167	171
CH353	A4.15	002_750 ug CBD	27	1	19	9	13	4	5	24	3	4	27	5	9	15	1	18	30	16	16	26	24	42	48	21	8	12	48	17	25	6	27	19	32	25	24	36	92	9	32	25	14	44	28	0	30	30	29
CH354	A4.16	002_750 ug CBD	46	34	34	33	43	25	23	19	6	34	16	24	12	25	15	25	45	53	47	45	19	40	51	65	11	7	16	11	46	58	59	38	19	6	13	44	40	53	22	22	26	63	124	149	48	18	4
CH359	B4.14	001_500ug CBD	22	8	30	17	71	23	11	36	13	7	22	75	13	22	27	56	57	9	37	25	47	56	62	63	36	60	35	17	13	25	6	74	108	108	49	42	58	51	114	96	148	47	8	22	2	6	21
CH360	B4.15	001_500ug CBD	50	29	67	37	41	15	14	22	21	10	17	26	35	20	17	23	42	41	36	40	20	23	16	58	26	12	37	63	22	22	43	93	104	50	23	83	68	12	16	17	46	8	6	10	1	10	4
CH365	C4.15	000_Emulsion Control	33	44	57	65	89	94	104	67	60	72	89	55	75	79	60	64	95	77	55	74	76	77	89	70	76	79	64	52	38	28	64	67	62	77	36	45	50	55	38	32	15	2	12	9	26	22	57
CH366	C4.16	000_Emulsion Control	11	23	30	60	60	68	63	64	63	80	76	70	73	75	97	79	71	98	70	71	65	61	69	82	84	75	109	127	137	121	129	134	168	135	148	164	149	186	180	159	121	90	126	134	171	168	175
[truncated: 98 more columns]

## Sheet: CBD ex3 tL
DATE:	2023-06-16 12:02:25
FILE:	C:\Software\WMicrotracker One\wmicrotracker_w8_v30api\wmicrotracker\wmicrotracker\p00025\20230613_1055
SUBPROJECT:	2023 0616 wDAT 0-400ug CBD tL batch #3
<<<<<< Group Activity: Average Activity Counts per Data Interval>>>>>>
Group/Time[m]	30	60	90	120	150	180	210	240	270	300	330	360	390	420	450	480	510	540	570	600	630	660	690	720	750	780	810	840	870	900	930	960	990	1020	1050	1080	1110	1140	1170	1200	1230	1260	1290	1320	1350	1380	1410	1440	1470
000_Emulsion control tL	51	43	46	52	57	53	56	60	65	62	61	66	70	62	64	62	61	58	58	54	49	46	42	40	37	33	37	33	30	25	25	21	19	16	14	12	11	9	7	9	9	12	14	24	26	31	36	43	46
001_Tween Control	53	50	53	52	60	62	60	66	72	71	75	75	73	69	69	69	60	61	53	51	46	45	40	39	35	30	29	25	25	24	20	19	18	20	20	19	17	14	11	7	10	11	12	18	22	27	33	37	42
002_300ug CBD	44	31	29	22	28	31	32	38	41	44	42	40	44	41	38	41	41	41	40	36	37	38	35	35	32	30	30	29	26	33	32	38	31	27	23	23	19	19	20	15	15	13	15	17	22	30	34	36	40
003_400ug CBD	48	28	21	21	25	25	25	29	31	35	35	36	39	41	37	37	41	39	42	40	38	39	36	32	31	34	29	30	24	21	26	35	29	30	31	27	26	24	19	20	17	13	14	16	14	16	22	29	32
<<<<<< Group Activity: Standard Error >>>>>>
Group/Time[m]	30	60	90	120	150	180	210	240	270	300	330	360	390	420	450	480	510	540	570	600	630	660	690	720	750	780	810	840	870	900	930	960	990	1020	1050	1080	1110	1140	1170	1200	1230	1260	1290	1320	1350	1380	1410	1440	1470
000_Emulsion control tL	1.7	1.7	3.5	4	4.6	2.3	3.5	3.5	2.9	1.7	0.6	0.6	2.3	1.7	2.3	2.3	0.6	2.9	2.9	2.9	1.2	1.2	2.9	1.2	2.3	1.7	1.7	3.5	2.9	3.5	1.7	5.2	4.6	3.5	2.9	0.6	1.7	2.3	2.9	3.5	4	2.9	4.6	6.9	6.9	5.8	4.6	5.2	6.4
001_Tween Control	4	4	3.5	4	4	3.5	3.5	2.9	1.7	4.6	1.2	3.5	2.3	2.9	2.3	1.7	1.2	1.2	1.7	2.3	1.7	2.9	1.2	0.6	3.5	2.9	1.2	0.6	4	5.8	4	2.9	1.7	5.8	6.9	4	2.9	1.7	1.7	2.3	1.7	2.3	3.5	4	3.5	4.6	4.6	4	4
002_300ug CBD	2.3	1.2	2.9	1.2	1.2	1.7	0.6	1.7	1.7	2.3	1.7	1.2	1.7	1.2	1.2	3.5	2.3	5.2	3.5	2.3	5.2	5.2	2.3	0.6	3.5	1.7	4.6	4.6	3.5	2.3	0.6	2.3	2.9	1.7	2.3	4	7.5	7.5	8.1	1.2	0.6	1.2	2.9	4	5.8	6.9	8.7	6.4	5.8
003_400ug CBD	3.5	1.7	2.3	1.7	2.9	1.7	1.2	1.2	2.9	1.7	2.3	5.8	4.6	4	4.6	1.7	8.7	5.8	6.4	6.9	6.4	9.2	6.9	5.8	5.8	4.6	5.2	7.5	5.2	2.9	4	3.5	2.3	6.4	8.7	3.5	1.7	4	6.9	3.5	4	1.2	1.2	1.2	1.2	2.3	3.5	5.8	6.4
<<<<<< Group Activity: Number of wells/group >>>>>>
Group/Time[m]	30	60	90	120	150	180	210	240	270	300	330	360	390	420	450	480	510	540	570	600	630	660	690	720	750	780	810	840	870	900	930	960	990	1020	1050	1080	1110	1140	1170	1200	1230	1260	1290	1320	1350	1380	1410	1440	1470
000_Emulsion control tL	3	3	3	3	3	3	3	3	3	3	3	3	3	3	3	3	3	3	3	3	3	3	3	3	3	3	3	3	3	3	3	3	3	3	3	3	3	3	3	3	3	3	3	3	3	3	3	3	3
001_Tween Control	3	3	3	3	3	3	3	3	3	3	3	3	3	3	3	3	3	3	3	3	3	3	3	3	3	3	3	3	3	3	3	3	3	3	3	3	3	3	3	3	3	3	3	3	3	3	3	3	3
002_300ug CBD	3	3	3	3	3	3	3	3	3	3	3	3	3	3	3	3	3	3	3	3	3	3	3	3	3	3	3	3	3	3	3	3	3	3	3	3	3	3	3	3	3	3	3	3	3	3	3	3	3
003_400ug CBD	3	3	3	3	3	3	3	3	3	3	3	3	3	3	3	3	3	3	3	3	3	3	3	3	3	3	3	3	3	3	3	3	3	3	3	3	3	3	3	3	3	3	3	3	3	3	3	3	3
<<<<<< Number of Samples per Acquisition Interval [1unit=500values] >>>>>>
Time[m]	30	60	90	120	150	180	210	240	270	300	330	360	390	420	450	480	510	540	570	600	630	660	690	720	750	780	810	840	870	900	930	960	990	1020	1050	1080	1110	1140	1170	1200	1230	1260	1290	1320	1350	1380	1410	1440	1470
#Samples	30	30	30	30	30	30	30	30	30	30	30	30	30	30	30	30	30	30	30	30	30	30	30	30	30	30	30	30	30	30	30	30	30	30	30	30	30	30	30	30	30	30	30	30	30	30	30	30	30
<<<<<< Average Temperature [°C] >>>>>>
Time[m]	30	60	90	120	150	180	210	240	270	300	330	360	390	420	450	480	510	540	570	600	630	660	690	720	750	780	810	840	870	900	930	960	990	1020	1050	1080	1110	1140	1170	1200	1230	1260	1290	1320	1350	1380	1410	1440	1470
Temp[°C]	22.6	22.6	22.8	22.8	22.8	22.8	22.8	22.8	22.8	22.8	22.8	22.8	22.8	22.8	22.8	22.8	22.8	22.8	22.8	22.8	22.8	22.8	22.8	22.8	22.8	22.8	22.8	22.8	22.8	22.8	22.8	22.8	22.8	22.8	22.8	22.8	22.8	22.8	22.8	22.8	22.8	22.8	22.8	22.8	22.8	22.8	22.8	22.8	22.8
<<<<<< Well Activity >>>>>>
Well	Group/Time[m]	30	60	90	120	150	180	210	240	270	300	330	360	390	420	450	480	510	540	570	600	630	660	690	720	750	780	810	840	870	900	930	960	990	1020	1050	1080	1110	1140	1170	1200	1230	1260	1290	1320	1350	1380	1410	1440
A1	002_300ug CBD	40	30	25	20	30	34	31	38	37	47	39	38	41	39	39	35	38	31	35	33	27	28	32	36	27	27	21	20	22	29	32	35	27	28	20	17	12	13	10	12	14	15	19	23	34	43	49	48
B1	001_Tween Control	56	56	60	60	67	68	64	70	74	77	75	81	74	73	73	66	61	63	56	46	44	40	42	38	33	25	27	25	31	35	28	19	21	30	32	27	17	11	15	5	9	10	18	26	28	36	42	43
C1	000_Emulsion control tL	53	42	46	52	58	52	52	54	60	60	60	65	67	61	67	57	62	58	61	57	47	46	44	42	34	36	40	40	35	29	27	22	15	14	11	13	12	8	8	8	2	8	6	15	18	27	31	34
A2	003_400ug CBD	43	26	18	20	20	23	25	30	25	33	34	25	30	33	28	34	25	29	31	28	26	23	23	21	20	25	19	15	21	17	18	28	26	18	14	20	26	16	6	14	11	12	15	16	14	19	27	34
B2	002_300ug CBD	48	31	35	24	27	28	31	41	43	39	42	42	44	40	39	44	40	45	40	36	42	43	34	34	39	32	34	34	33	37	32	36	37	29	22	22	10	10	13	16	16	11	17	18	18	27	33	34
C2	001_Tween Control	57	51	50	48	54	57	54	61	68	62	73	70	69	64	69	69	62	60	52	52	46	45	38	38	31	30	31	24	18	18	16	14	15	20	20	17	12	15	9	5	8	7	7	12	19	24	28	37
A3	000_Emulsion control tL	53	47	52	59	64	57	63	66	70	65	61	67	74	65	64	64	62	62	60	56	50	48	46	38	42	34	35	28	26	28	25	11	15	22	20	11	13	14	11	15	15	17	22	38	40	42	45	52
B3	003_400ug CBD	55	32	26	18	26	25	23	27	34	34	39	39	46	46	40	37	54	49	52	51	48	54	46	37	38	41	36	34	34	27	30	39	29	39	38	29	24	27	29	26	17	11	12	18	15	16	24	36
C3	002_300ug CBD	44	33	27	21	27	30	33	35	43	45	44	40	46	43	36	45	46	48	46	40	43	43	40	34	31	30	34	34	24	32	33	43	30	24	27	31	34	33	36	16	14	12	10	9	15	19	19	27
A4	001_Tween Control	45	42	49	49	59	60	63	66	73	73	76	73	76	71	65	72	58	60	50	54	49	49	41	40	42	34	29	26	26	19	16	23	17	10	9	13	21	16	10	12	13	15	10	15	18	20	30	30
B4	000_Emulsion control tL	48	41	41	45	48	50	54	59	64	61	62	65	69	60	60	65	60	53	52	48	49	45	37	40	35	30	37	32	29	18	22	29	28	11	12	13	7	6	1	4	11	10	13	20	19	23	32	42
C4	003_400ug CBD	45	26	19	24	29	28	27	30	33	39	31	44	40	44	44	39	44	40	44	40	41	40	40	38	35	36	32	41	17	19	29	37	33	32	41	32	29	30	22	20	24	15	16	15	12	12	16	17
<<<<<< Channel Activity >>>>>>
Channel	Well	Group/Time[m]	30	60	90	120	150	180	210	240	270	300	330	360	390	420	450	480	510	540	570	600	630	660	690	720	750	780	810	840	870	900	930	960	990	1020	1050	1080	1110	1140	1170	1200	1230	1260	1290	1320	1350	1380	1410
CH17	A1.0	002_300ug CBD	29	30	14	5	40	28	9	5	7	10	0	0	0	0	0	0	0	0	0	0	0	0	0	0	0	0	0	0	0	0	0	0	0	0	0	0	0	0	0	0	0	0	0	0	0	0	0
CH18	A1.1	002_300ug CBD	33	15	9	1	7	3	14	22	35	39	12	26	14	28	14	3	25	8	15	6	14	16	1	22	16	2	5	1	0	0	4	1	25	5	0	1	0	0	0	3	1	2	1	5	9	9	15
CH23	B1.0	001_Tween Control	32	21	25	11	44	52	48	63	77	76	64	81	68	85	65	67	53	42	43	20	53	20	16	65	55	30	14	5	8	0	1	4	6	25	8	3	2	1	0	0	0	0	3	13	1	4	3
CH24	B1.1	001_Tween Control	35	39	27	27	43	48	51	43	77	78	60	58	76	84	51	64	39	40	42	60	27	47	49	9	13	15	12	15	83	138	52	12	2	7	4	2	0	0	0	0	0	2	3	1	2	0	19
CH29	C1.0	000_Emulsion control tL	21	21	11	17	41	27	55	55	43	63	47	39	102	58	64	42	59	77	72	62	57	27	38	23	23	41	18	4	2	11	39	13	4	0	1	2	0	0	0	0	0	0	1	0	2	1	3
CH30	C1.1	000_Emulsion control tL	27	16	35	20	31	47	26	35	53	53	77	59	56	74	65	63	56	80	81	87	80	73	112	64	53	53	115	113	45	15	17	16	4	0	9	3	1	0	0	0	0	0	7	5	5	1	4
CH32	A1.2	002_300ug CBD	20	13	52	21	14	45	24	42	29	37	26	18	47	17	24	15	67	53	35	35	41	83	38	21	31	9	27	12	21	16	40	2	0	1	0	6	2	0	0	1	0	0	1	1	2	1	9
CH33	A1.3	002_300ug CBD	50	12	1	17	22	25	8	36	15	63	26	27	38	31	34	29	38	25	16	8	22	16	8	7	7	0	21	3	2	3	6	4	0	10	0	10	7	10	0	0	0	3	30	2	4	2	17
CH34	A1.4	002_300ug CBD	35	29	32	11	2	13	28	6	19	10	19	19	16	17	22	18	13	20	14	27	15	25	15	17	7	22	13	13	15	7	11	25	2	1	1	17	2	0	0	2	0	0	18	18	5	42	56
CH35	A1.5	002_300ug CBD	55	10	1	9	4	15	19	32	32	38	21	24	27	26	32	35	22	21	33	42	17	7	12	4	5	0	2	17	13	8	9	2	2	0	0	0	0	0	1	8	20	6	3	10	17	13	30
CH38	B1.2	001_Tween Control	21	23	44	29	45	28	27	17	5	4	0	0	1	0	1	2	1	0	0	0	0	0	0	0	0	0	0	0	0	0	1	3	3	0	5	3	2	1	0	0	0	6	2	5	0	22	7
CH39	B1.3	001_Tween Control	34	17	28	53	50	67	71	73	92	76	80	86	65	71	70	76	51	75	38	29	27	39	31	22	7	4	13	0	14	4	0	1	3	0	1	0	0	0	0	0	0	2	0	15	4	4	11
CH40	B1.4	001_Tween Control	31	27	22	35	41	63	59	83	64	83	91	85	103	68	66	71	45	66	49	35	38	25	22	30	9	19	15	6	9	2	7	0	2	2	0	0	0	0	0	1	0	0	6	4	5	12	26
CH41	B1.5	001_Tween Control	24	55	48	68	103	68	89	74	96	92	105	113	84	82	88	56	76	72	58	31	47	63	37	45	32	18	15	19	14	0	0	2	0	5	2	0	1	1	6	0	0	0	2	2	3	19	19
CH44	C1.2	000_Emulsion control tL	32	30	27	21	33	17	14	10	40	37	41	44	56	47	60	43	63	38	52	59	27	60	42	14	22	48	6	7	15	18	3	7	13	2	7	2	2	3	0	0	0	7	1	1	3	0	1
CH45	C1.3	000_Emulsion control tL	28	20	13	29	33	51	34	38	37	50	47	46	79	54	66	44	82	67	68	53	34	36	35	46	41	2	42	30	7	4	7	3	11	9	0	4	8	6	0	4	0	0	0	6	3	2	2
CH46	C1.4	000_Emulsion control tL	30	23	49	39	40	45	54	53	66	53	56	76	72	110	108	83	98	97	103	86	69	80	71	23	24	33	33	21	11	8	10	7	1	2	13	7	0	2	0	0	0	0	0	7	16	12	9
CH47	C1.5	000_Emulsion control tL	16	24	45	37	51	68	59	68	64	76	72	73	73	78	68	64	57	74	60	72	64	53	48	77	33	59	51	97	79	32	10	13	31	29	12	12	24	3	5	0	1	2	1	3	10	16	28
CH48	A1.6	002_300ug CBD	25	22	58	60	72	65	44	68	60	87	93	70	85	90	75	63	46	59	69	36	66	42	51	19	52	18	17	5	14	0	10	2	5	29	38	5	1	0	0	0	0	0	2	17	3	4	23
CH49	A1.7	002_300ug CBD	43	23	23	10	28	15	13	19	34	53	36	44	34	50	45	48	44	28	36	35	26	12	20	18	23	7	13	7	2	3	9	0	7	0	0	0	0	0	0	0	0	0	7	1	31	32	51
CH50	A1.8	002_300ug CBD	48	15	7	18	15	14	14	30	21	36	26	38	16	32	39	20	32	16	42	17	9	8	13	11	6	20	13	13	0	9	6	1	0	2	0	0	0	0	0	15	22	3	10	4	0	19	30
CH51	A1.9	002_300ug CBD	60	64	53	8	62	31	34	33	46	53	24	12	46	33	20	30	41	11	21	42	18	12	30	22	9	18	6	9	7	25	23	5	8	2	2	3	1	0	0	0	3	1	1	10	23	33	80
CH52	A1.10	002_300ug CBD	83	62	39	47	29	48	79	48	53	41	52	38	42	17	29	42	57	44	26	28	14	14	47	82	38	58	21	36	48	88	78	9	2	95	38	51	20	33	16	19	4	48	47	46	77	81	63
CH54	B1.6	001_Tween Control	28	28	49	31	40	53	50	62	76	78	68	85	82	77	77	69	57	84	84	29	33	19	36	17	26	16	11	25	15	8	3	2	0	2	0	1	0	0	4	0	2	1	6	3	7	11	22
CH55	B1.7	001_Tween Control	57	45	47	32	46	57	57	83	71	73	87	83	101	84	99	62	74	61	36	44	28	28	19	26	20	14	18	6	4	2	24	9	2	5	0	0	0	0	0	0	0	0	2	9	10	16	9
CH56	B1.8	001_Tween Control	83	82	47	49	76	62	81	78	64	74	87	95	96	64	96	68	67	74	72	48	48	41	42	40	12	25	11	5	23	6	1	3	0	2	0	0	0	0	0	0	0	0	3	10	14	12	13
CH57	B1.9	001_Tween Control	29	42	51	70	82	88	70	84	83	94	101	94	90	81	87	78	70	72	53	47	48	38	54	36	38	22	18	27	2	22	22	1	9	0	1	0	9	7	0	0	0	3	3	19	17	25	40
CH59	C1.6	000_Emulsion control tL	51	44	48	75	69	67	63	65	49	69	54	78	85	57	79	80	62	66	75	45	55	58	46	40	66	49	91	99	114	40	28	19	19	4	12	13	11	43	1	0	1	5	8	16	0	19	8
CH60	C1.7	000_Emulsion control tL	58	70	20	40	29	25	13	26	34	36	30	48	56	43	45	47	59	32	39	43	30	31	28	18	11	12	25	5	9	8	4	8	6	3	0	0	0	0	0	0	0	0	0	5	0	36	3
CH61	C1.8	000_Emulsion control tL	45	32	23	32	49	41	25	32	55	42	47	59	53	46	43	52	86	52	64	60	27	50	25	41	29	42	62	19	59	158	147	58	7	11	2	0	2	0	0	0	0	0	0	0	24	1	11
CH62	C1.9	000_Emulsion control tL	57	29	50	73	70	42	81	87	79	84	69	87	84	87	86	93	77	77	70	58	59	48	78	92	43	60	62	42	53	44	2	5	6	4	4	1	5	3	0	3	0	3	0	1	3	14	40
CH63	C1.10	000_Emulsion control tL	29	27	43	82	117	88	81	85	102	114	123	96	83	86	88	74	80	69	57	72	84	62	58	68	70	48	37	53	34	22	14	11	7	11	12	0	1	0	2	4	0	1	6	9	31	34	68
CH64	A1.11	002_300ug CBD	12	27	38	26	24	78	26	51	53	74	67	86	78	71	87	70	47	69	57	82	61	62	133	135	105	138	129	151	75	54	77	109	79	30	20	73	16	6	5	2	0	4	5	6	19	66	58
CH65	A1.12	002_300ug CBD	26	46	35	47	53	75	53	60	71	53	54	63	71	73	68	64	85	58	97	115	67	55	30	111	85	50	26	38	32	164	119	167	81	58	9	1	5	0	0	0	0	2	2	13	49	41	82
CH66	A1.13	002_300ug CBD	37	43	24	19	37	24	30	46	39	59	50	44	65	55	44	50	28	26	22	21	24	21	46	12	11	55	28	0	9	8	7	10	29	7	3	0	0	10	0	1	0	1	6	12	14	34	19
CH67	A1.14	002_300ug CBD	60	54	15	15	57	41	55	44	49	55	50	36	59	71	29	36	54	33	46	20	3	68	56	20	12	11	5	10	50	33	17	29	17	33	23	0	1	1	1	1	3	20	28	11	44	34	59
CH70	B1.10	001_Tween Control	46	60	104	106	99	83	93	103	79	80	47	81	36	48	42	48	48	26	35	23	21	21	36	21	4	8	7	7	3	4	7	11	5	4	0	8	0	0	0	0	2	6	7	6	12	10	9
CH71	B1.11	001_Tween Control	65	63	34	46	55	47	60	63	66	74	75	67	54	78	62	67	40	45	45	43	63	31	30	27	19	20	15	27	19	23	0	6	5	0	4	0	0	0	2	2	1	3	2	5	19	20	15
CH72	B1.12	001_Tween Control	84	73	73	80	58	104	59	58	62	72	65	83	73	59	76	61	82	56	56	42	34	38	38	20	34	17	28	11	25	19	0	0	0	0	3	0	0	0	0	1	3	0	12	22	23	40	58
CH73	B1.13	001_Tween Control	109	109	151	128	118	126	97	107	109	110	81	103	90	100	122	102	98	111	117	92	92	81	114	90	87	51	104	68	35	41	52	84	166	214	106	65	22	11	23	0	29	56	120	154	147	163	160
CH76	C1.11	000_Emulsion control tL	118	76	83	31	23	4	1	0	0	1	0	0	0	0	0	0	0	0	0	0	0	0	0	0	0	0	0	0	0	0	0	0	0	0	0	0	0	0	0	0	0	0	0	0	0	0	0
CH77	C1.12	000_Emulsion control tL	64	85	50	45	62	45	46	50	76	68	50	45	48	52	58	53	49	51	37	52	34	26	17	25	35	13	17	16	11	9	2	14	4	9	0	2	0	0	0	0	0	2	0	4	4	8	24
CH78	C1.13	000_Emulsion control tL	74	34	69	104	78	67	89	81	81	72	64	89	86	59	70	61	45	56	85	36	48	53	38	24	19	22	29	31	27	12	8	5	5	12	7	7	4	5	0	0	6	12	3	2	11	47	49
CH79	C1.14	000_Emulsion control tL	47	34	70	113	113	98	108	109	102	93	100	129	104	100	102	80	100	82	83	101	72	81	59	90	67	62	62	77	82	72	84	107	126	128	92	148	142	68	114	75	31	92	61	155	158	186	196
CH81	A1.15	002_300ug CBD	17	17	16	15	26	37	20	42	12	20	28	3	15	9	19	12	8	5	7	5	7	1	1	75	1	1	4	2	1	0	117	230	172	175	146	119	129	151	151	145	158	150	144	162	184	181	153
CH82	A1.16	002_300ug CBD	39	23	12	10	13	18	51	70	56	75	71	103	47	40	74	67	31	49	57	34	55	26	36	29	50	56	22	25	91	83	15	0	30	20	55	9	22	17	2	10	23	17	17	75	96	142	80
CH87	B1.14	001_Tween Control	68	90	99	82	70	44	21	36	80	69	85	76	74	107	70	75	68	94	82	96	88	79	72	46	82	70	92	135	161	163	212	128	104	137	116	89	40	17	53	7	6	30	37	61	57	72	94
CH88	B1.15	001_Tween Control	148	117	115	114	107	97	87	85	82	102	100	105	95	81	89	82	112	90	94	105	56	73	83	106	87	71	58	46	87	125	69	41	30	76	259	254	201	138	151	68	97	43	88	94	134	148	170
CH93	C1.15	000_Emulsion control tL	139	88	82	60	77	97	75	71	81	64	95	86	53	53	77	50	63	40	40	48	35	22	37	37	24	51	30	34	21	30	73	75	13	8	10	15	3	5	7	47	2	9	8	10	11	40	31
CH94	C1.16	000_Emulsion control tL	62	55	70	71	65	55	64	57	66	41	49	54	49	39	52	34	20	33	46	36	21	29	24	25	19	17	6	24	22	7	11	16	4	11	14	2	7	0	4	2	0	8	12	24	32	41	43
CH113	A2.0	003_400ug CBD	63	52	14	40	8	17	7	16	15	9	10	1	8	5	3	7	9	13	0	5	0	2	0	0	0	0	1	1	0	0	0	0	0	0	1	0	0	0	1	0	0	0	4	0	0	0	0
CH114	A2.1	003_400ug CBD	55	19	31	2	18	26	27	74	14	12	20	8	24	17	13	14	15	21	14	17	25	12	2	25	39	10	25	13	0	8	2	32	75	7	6	0	13	87	28	79	28	61	80	17	7	5	6
CH115	A2.2	003_400ug CBD	28	11	1	2	17	17	10	18	23	15	7	15	3	1	2	1	1	0	17	32	18	22	22	6	1	14	1	0	6	22	16	8	52	3	6	76	144	70	1	3	6	6	75	84	72	78	62
CH118	B2.0	002_300ug CBD	17	10	3	0	1	0	0	2	0	1	0	0	0	0	0	0	0	0	0	0	0	0	0	0	0	0	0	0	0	0	0	0	0	0	0	0	0	0	0	0	0	0	0	0	0	0	0
CH119	B2.1	002_300ug CBD	31	29	32	1	5	8	8	32	24	34	44	37	40	44	39	41	43	56	43	14	38	40	31	16	17	14	32	4	21	72	10	11	5	5	11	8	4	1	0	7	0	2	12	4	1	14	25
CH120	B2.2	002_300ug CBD	41	28	53	15	7	10	3	6	34	27	36	20	30	9	22	16	25	40	37	43	19	13	19	18	9	20	5	5	4	7	1	35	8	24	9	4	0	2	0	2	2	2	7	5	6	3	9
CH121	B2.3	002_300ug CBD	50	14	28	17	11	27	24	44	12	30	27	33	24	18	35	20	17	15	21	21	24	22	31	29	49	14	21	10	6	43	15	5	20	13	0	5	0	0	0	0	3	1	16	0	3	14	3
CH124	C2.0	001_Tween Control	86	37	21	0	2	0	0	0	0	0	0	0	0	0	0	0	0	0	0	0	0	0	0	0	0	0	0	0	0	0	0	0	0	0	0	0	0	0	0	0	0	0	0	0	0	0	0
CH125	C2.1	001_Tween Control	38	47	22	31	34	43	33	68	77	47	71	61	54	79	52	57	50	35	53	44	45	48	17	44	31	13	23	9	16	12	7	13	4	5	2	10	9	5	3	2	0	1	2	3	0	1	9
CH126	C2.2	001_Tween Control	20	25	10	37	57	88	64	64	66	57	58	71	61	80	60	68	59	69	44	30	25	31	40	24	22	54	27	18	16	14	24	6	8	28	9	4	0	2	2	1	0	0	0	1	0	1	1
CH128	A2.3	003_400ug CBD	40	46	18	28	28	55	37	47	36	18	50	67	44	40	57	49	59	36	61	70	45	27	81	59	31	84	50	17	0	18	1	28	12	24	12	3	0	1	12	53	37	0	0	3	0	5	3
CH129	A2.4	003_400ug CBD	43	26	26	49	31	44	20	51	60	57	35	32	18	19	27	25	23	27	26	20	22	13	14	20	21	36	4	4	0	10	4	0	23	15	1	2	9	20	46	17	59	69	43	30	32	17	58
CH130	A2.5	003_400ug CBD	29	15	6	4	31	15	2	3	7	12	14	3	21	21	24	45	14	16	14	14	1	11	8	2	11	12	3	4	1	10	27	0	5	5	35	10	1	0	0	0	0	0	1	0	3	9	8
CH131	A2.6	003_400ug CBD	71	13	8	2	3	26	20	15	27	23	45	9	10	25	14	19	11	19	58	17	12	11	3	8	3	6	5	5	2	3	0	2	2	3	0	0	1	2	0	0	0	0	0	7	21	4	16
CH132	A2.7	003_400ug CBD	40	14	5	8	2	3	6	18	15	43	20	8	27	17	13	23	25	13	14	12	14	7	24	15	7	17	11	9	16	8	64	26	46	9	16	44	75	15	2	14	10	2	2	10	4	8	28
CH134	B2.4	002_300ug CBD	38	41	9	4	19	21	50	74	62	59	110	70	82	100	67	82	82	85	65	54	108	99	44	24	89	42	27	55	58	48	29	33	33	17	3	9	0	0	0	0	0	0	0	0	32	2	9
CH135	B2.5	002_300ug CBD	33	26	20	10	28	28	17	45	43	32	34	33	41	28	21	33	33	52	32	31	40	41	27	26	17	2	25	33	45	31	16	13	9	3	4	3	0	10	55	111	29	28	81	60	24	46	8
CH136	B2.6	002_300ug CBD	48	48	33	49	28	23	32	23	32	22	19	20	22	21	25	26	13	24	28	33	39	38	33	25	20	11	36	32	18	14	2	13	6	0	2	11	4	0	0	8	5	3	1	5	18	6	15
CH137	B2.7	002_300ug CBD	36	14	24	25	17	27	32	29	29	27	20	31	22	31	17	18	35	29	9	21	26	12	16	28	62	10	11	20	16	15	68	86	106	18	43	1	0	3	1	0	0	2	5	1	13	38	20
CH139	C2.3	001_Tween Control	61	68	87	67	51	34	39	49	79	65	87	61	65	69	70	68	59	76	69	74	61	58	65	25	22	30	12	12	6	7	2	13	1	0	4	0	0	2	0	0	0	0	2	2	12	3	11
CH140	C2.4	001_Tween Control	44	58	42	27	21	34	40	35	40	41	62	47	68	61	59	58	74	65	30	48	47	41	32	17	25	18	4	9	6	6	9	2	3	5	19	23	9	28	28	0	1	2	2	2	2	1	5
CH141	C2.5	001_Tween Control	48	42	22	27	20	24	39	42	38	44	61	59	44	47	51	66	36	59	41	32	20	24	41	11	8	5	10	7	10	9	0	4	4	1	3	2	6	27	22	10	2	0	4	12	0	8	9
CH142	C2.6	001_Tween Control	46	30	27	39	55	63	52	59	66	65	100	85	97	83	81	76	61	66	72	35	41	48	38	62	35	8	11	9	16	11	15	4	5	3	3	0	2	2	0	0	0	0	1	2	11	12	17
CH143	C2.7	001_Tween Control	24	23	53	76	103	104	79	105	113	83	75	95	95	89	88	69	95	103	69	54	64	71	30	33	59	31	43	22	26	25	7	9	7	20	15	12	2	0	1	0	0	0	2	1	4	19	9
CH144	A2.8	003_400ug CBD	17	40	52	36	35	25	32	22	38	30	109	38	60	81	65	86	50	68	52	57	27	29	15	21	38	75	62	6	36	1	15	25	5	1	2	0	0	0	2	8	7	6	11	8	14	16	11
CH145	A2.9	003_400ug CBD	44	16	4	9	11	10	28	31	24	41	27	21	30	33	21	23	20	33	27	20	27	34	29	7	2	6	8	3	6	14	0	7	10	56	52	14	1	4	2	0	1	0	0	2	6	1	22
CH146	A2.10	003_400ug CBD	37	11	24	11	34	13	25	0	11	39	22	15	51	42	26	36	18	19	16	2	21	14	29	29	31	33	10	9	25	0	6	43	45	24	9	18	20	3	2	19	0	4	2	6	4	21	19
CH147	A2.11	003_400ug CBD	69	57	32	41	39	16	37	34	49	59	28	17	47	41	52	48	17	16	2	20	33	33	15	15	6	17	8	3	0	7	0	31	6	7	2	9	0	3	9	4	16	43	6	20	7	15	20
CH148	A2.12	003_400ug CBD	83	58	25	14	29	37	45	47	32	19	28	36	18	26	34	19	32	12	28	8	12	13	18	22	12	8	15	5	16	1	15	5	5	13	13	16	10	0	0	0	0	1	10	8	18	25	38
CH150	B2.8	002_300ug CBD	45	37	38	25	16	46	39	46	70	47	57	98	71	74	72	92	75	88	97	73	106	106	60	91	67	74	108	116	56	83	118	99	74	71	18	2	0	0	0	0	0	0	2	29	2	13	23
CH151	B2.9	002_300ug CBD	43	23	53	29	47	39	33	39	40	42	27	49	46	36	66	95	41	35	62	57	44	33	44	36	61	66	47	5	37	14	39	26	67	108	46	20	14	11	0	0	0	0	2	11	8	27	39
CH152	B2.10	002_300ug CBD	37	23	22	15	15	29	10	15	26	39	23	15	22	15	20	24	33	25	21	26	23	16	23	9	19	11	9	24	32	14	7	4	22	7	24	24	10	2	1	0	1	3	15	53	33	33	35
CH153	B2.11	002_300ug CBD	80	42	81	58	74	33	58	69	79	46	31	51	31	56	43	50	20	46	30	32	23	16	23	16	5	17	7	10	22	7	1	13	9	9	3	17	6	0	0	0	0	0	2	8	9	20	63
CH155	C2.8	001_Tween Control	108	91	91	53	32	76	41	54	58	64	80	74	90	53	60	109	83	73	61	115	56	60	27	36	36	49	49	11	10	38	21	13	20	34	45	15	28	31	8	0	0	1	0	6	7	13	17
CH156	C2.9	001_Tween Control	75	84	55	42	36	31	46	66	70	49	75	64	68	50	89	68	53	55	47	46	34	43	23	32	34	21	16	59	1	13	5	3	4	7	11	15	0	2	1	0	0	0	0	0	0	7	19
CH157	C2.10	001_Tween Control	71	43	48	44	35	35	44	38	65	57	69	69	70	54	55	53	44	34	42	31	29	19	52	52	39	10	17	6	4	5	6	2	2	2	2	2	0	0	0	0	2	0	0	4	4	5	19
CH158	C2.11	001_Tween Control	39	37	53	47	75	62	43	71	68	82	91	98	79	67	97	86	71	51	54	37	35	27	32	31	26	33	30	70	9	14	2	4	0	13	3	7	1	3	0	0	2	0	0	4	5	12	23
CH159	C2.12	001_Tween Control	41	34	54	87	104	112	102	92	96	105	106	79	93	72	97	108	70	59	51	56	59	56	48	75	35	33	50	42	30	11	14	19	27	14	3	0	0	1	0	2	1	6	7	10	26	23	17
CH160	A2.13	003_400ug CBD	10	10	4	22	16	7	18	29	17	41	33	54	48	37	18	48	49	50	71	39	47	37	24	51	55	32	53	143	185	135	78	67	74	69	42	24	7	22	0	11	15	11	12	10	24	23	23
CH161	A2.14	003_400ug CBD	20	22	28	19	16	29	34	27	18	46	63	41	40	79	52	62	32	57	45	46	11	74	41	15	31	47	41	27	19	10	10	18	36	16	1	9	11	6	0	20	2	0	8	54	16	21	45
CH162	A2.15	003_400ug CBD	40	10	2	32	7	27	17	48	14	58	27	21	24	47	38	42	28	68	72	58	8	35	55	59	39	18	9	7	14	27	5	31	10	8	20	104	108	43	0	0	0	1	1	0	9	20	37
CH163	A2.16	003_400ug CBD	50	18	33	25	23	32	67	33	22	31	37	39	41	31	25	24	29	20	13	35	117	12	9	4	5	18	16	6	27	16	64	151	40	42	15	12	37	4	2	6	11	7	0	9	5	49	58
CH166	B2.12	002_300ug CBD	36	36	65	33	35	39	41	53	63	83	90	79	97	75	85	90	89	102	69	75	79	140	75	118	117	149	146	130	115	134	110	169	136	118	97	133	48	20	29	2	14	30	23	19	16	16	53
CH167	B2.13	002_300ug CBD	57	34	27	44	52	33	70	49	43	26	48	48	39	62	48	54	54	42	53	39	50	51	52	26	19	14	27	66	30	55	57	41	45	52	52	45	34	53	19	3	23	4	4	12	33	67	122
CH168	B2.14	002_300ug CBD	93	38	48	46	42	42	48	91	71	40	48	39	97	42	33	25	49	47	41	23	20	39	28	36	40	45	11	2	32	9	4	8	26	8	10	5	25	16	56	47	106	79	72	19	20	65	67
CH169	B2.15	002_300ug CBD	84	49	23	15	28	36	29	35	64	66	64	55	37	33	29	39	30	35	39	26	31	15	38	39	29	30	25	37	43	42	32	24	21	12	38	65	12	42	51	81	79	21	37	60	70	63	44
CH172	C2.13	001_Tween Control	111	92	65	54	56	57	65	80	70	67	79	76	74	61	61	87	62	92	60	102	64	52	51	39	55	49	81	11	25	49	24	35	22	27	37	22	5	5	0	1	0	9	0	6	13	16	26
CH173	C2.14	001_Tween Control	69	68	71	49	55	54	63	44	79	56	67	77	65	53	85	49	61	48	43	35	69	47	41	64	27	18	23	16	11	23	9	11	14	6	3	1	5	0	0	0	52	24	2	1	4	8	23
CH174	C2.15	001_Tween Control	65	58	62	58	71	78	83	79	74	70	85	79	69	72	78	69	93	76	76	56	73	65	43	27	28	44	33	15	14	9	10	2	10	8	0	0	3	0	0	0	0	1	3	8	18	38	44
CH175	C2.16	001_Tween Control	16	37	68	71	104	69	92	94	93	96	76	90	73	98	90	77	80	65	66	82	61	71	70	70	48	95	105	93	98	63	109	92	132	160	180	184	132	153	84	71	74	68	95	134	214	233	233
CH208	A3.0	000_Emulsion control tL	18	18	36	36	68	64	58	59	65	46	55	60	48	47	82	52	59	85	81	75	113	58	64	23	165	38	93	36	10	8	0	0	2	0	3	0	0	0	0	0	0	3	2	6	10	23	9
CH209	A3.1	000_Emulsion control tL	31	24	83	61	61	43	35	55	70	49	40	65	65	68	54	48	56	40	44	36	46	25	22	12	25	22	30	17	21	11	29	13	4	15	6	0	0	0	0	0	1	0	0	4	7	11	6
CH210	A3.2	000_Emulsion control tL	55	52	55	66	49	56	64	56	71	44	50	76	60	47	50	54	49	53	41	34	57	54	25	14	23	19	14	8	8	2	7	0	0	13	1	1	0	0	0	10	0	4	3	29	15	12	6
CH211	A3.3	000_Emulsion control tL	49	23	30	30	45	49	27	59	64	49	36	28	33	36	28	34	29	52	36	38	26	24	10	15	15	3	6	7	11	53	6	8	34	8	11	2	2	5	3	2	4	6	6	30	11	15	18
CH214	B3.0	003_400ug CBD	58	32	29	20	43	20	28	56	56	65	98	90	67	72	62	67	79	87	93	69	109	105	80	64	87	127	24	60	22	33	3	58	4	41	46	10	13	73	72	34	0	11	0	27	4	2	16
CH215	B3.1	003_400ug CBD	57	27	34	3	5	21	11	30	22	21	12	14	19	22	17	35	60	37	13	44	46	40	15	25	59	30	27	33	19	25	28	16	29	32	2	6	6	7	2	0	5	5	19	1	13	4	2
CH216	B3.2	003_400ug CBD	79	32	25	13	40	6	19	2	20	17	29	8	19	23	44	15	22	12	21	24	12	37	13	7	0	9	7	5	8	24	23	34	30	43	24	14	43	18	5	0	0	2	2	2	6	2	2
CH217	B3.3	003_400ug CBD	71	46	43	26	6	18	10	0	37	41	45	33	22	19	21	4	42	47	35	25	17	65	36	94	29	10	37	16	14	2	1	20	9	0	19	5	0	0	44	99	27	63	99	131	53	23	29
CH220	C3.0	002_300ug CBD	89	103	104	95	78	72	90	79	118	90	76	42	96	77	59	63	81	78	81	48	113	74	114	96	39	51	72	97	9	38	6	88	106	34	24	13	33	139	189	31	3	5	0	2	12	3	14
CH221	C3.1	002_300ug CBD	89	62	25	18	2	20	30	2	30	19	31	44	28	43	24	29	39	46	36	40	27	23	31	8	16	15	22	4	4	2	69	91	4	4	8	2	4	0	3	8	0	0	0	8	6	0	5
CH222	C3.2	002_300ug CBD	23	22	12	5	13	41	11	37	20	34	14	39	34	19	38	32	30	50	26	23	29	18	15	32	6	21	11	7	0	2	8	5	23	18	16	0	1	1	0	2	3	3	2	1	2	4	6
CH223	C3.3	002_300ug CBD	6	17	1	20	7	30	2	20	9	25	18	18	19	14	22	34	24	26	34	29	30	41	12	35	16	9	8	19	5	11	0	5	0	18	3	28	1	0	3	0	6	8	10	11	20	23	3
CH224	A3.4	000_Emulsion control tL	31	35	16	32	36	41	56	62	32	42	48	55	93	58	72	66	36	56	57	51	21	38	16	12	11	16	23	5	4	4	4	0	7	0	0	0	0	0	3	0	0	7	3	2	8	13	21
CH225	A3.5	000_Emulsion control tL	42	36	55	45	56	46	44	62	51	66	53	87	78	85	71	84	99	76	60	57	62	42	39	46	22	27	18	11	8	5	4	4	5	10	15	4	0	0	0	2	2	1	0	10	14	14	16
CH226	A3.6	000_Emulsion control tL	47	38	52	56	63	48	67	57	60	73	69	69	80	75	76	62	84	102	117	101	58	75	42	24	16	37	11	17	22	5	20	1	2	47	19	2	0	3	1	0	6	3	11	13	13	39	9
CH227	A3.7	000_Emulsion control tL	71	61	52	71	53	66	69	69	79	72	48	66	79	55	50	32	56	51	55	66	22	32	21	20	14	17	7	16	7	2	1	11	1	2	5	1	3	2	18	5	21	19	6	12	36	30	47
CH228	A3.8	000_Emulsion control tL	118	105	105	99	89	84	89	67	79	67	66	45	49	46	49	70	57	37	45	39	51	66	37	26	15	36	35	49	53	37	22	22	12	82	67	104	87	28	3	3	6	5	17	29	113	60	90
CH230	B3.4	003_400ug CBD	47	58	45	29	28	25	9	12	46	48	23	42	35	45	38	65	79	76	73	71	47	111	33	45	51	87	56	67	84	50	11	77	64	31	6	13	7	21	43	97	75	3	1	4	3	33	6
CH231	B3.5	003_400ug CBD	49	22	10	11	21	11	24	12	8	49	41	28	39	57	23	26	39	38	17	38	51	32	36	22	16	50	20	19	11	12	3	40	51	18	14	25	16	8	0	0	9	0	5	6	7	15	9
CH232	B3.6	003_400ug CBD	76	26	33	3	16	38	15	27	38	28	50	50	40	19	26	40	25	33	16	14	17	17	39	11	13	32	14	21	23	20	9	8	7	7	24	16	11	4	2	2	1	1	3	9	10	6	11
CH233	B3.7	003_400ug CBD	94	38	38	12	61	27	16	33	55	17	46	23	72	44	13	14	14	26	14	52	13	38	63	28	13	13	51	23	15	4	0	35	7	11	19	21	7	6	2	0	2	0	0	5	10	3	8
CH235	C3.4	002_300ug CBD	51	30	33	23	22	43	42	35	32	55	48	56	59	55	37	55	44	60	50	38	59	52	31	31	29	19	29	10	3	4	1	22	20	11	4	0	1	3	2	0	0	0	0	0	0	1	3
CH236	C3.5	002_300ug CBD	78	56	69	12	43	46	44	40	20	33	51	38	44	42	35	45	64	38	52	47	43	54	29	26	38	23	26	71	53	100	21	5	12	6	12	17	0	30	107	61	7	0	0	2	0	0	11
CH237	C3.6	002_300ug CBD	51	29	45	44	44	32	26	48	43	61	80	21	44	49	34	42	38	47	23	50	46	72	53	33	49	11	5	0	5	37	14	24	10	10	34	2	18	65	24	8	0	3	0	2	13	1	4
CH238	C3.7	002_300ug CBD	32	27	11	15	8	11	33	44	31	61	20	30	39	35	53	39	43	63	27	43	63	26	26	14	24	13	37	18	7	35	30	79	5	11	72	16	0	6	0	1	4	0	0	5	1	1	4
CH239	C3.8	002_300ug CBD	18	12	7	1	41	19	20	25	52	41	34	21	38	24	16	29	37	30	43	24	24	35	27	53	32	6	11	31	10	48	66	24	3	5	5	2	6	6	1	0	4	0	0	7	23	36	15
CH240	A3.9	000_Emulsion control tL	31	28	29	45	60	46	45	41	47	53	69	49	94	73	47	98	48	52	67	59	26	40	134	135	158	68	39	45	48	188	177	16	0	36	1	0	0	0	2	0	0	2	9	53	10	8	22
CH241	A3.10	000_Emulsion control tL	45	39	21	63	54	45	38	58	58	66	60	85	83	105	73	78	62	51	51	57	26	34	26	13	13	24	11	11	4	1	2	6	9	0	4	0	0	0	0	1	0	12	5	10	6	23	22
CH242	A3.11	000_Emulsion control tL	50	39	20	29	61	70	66	61	93	87	99	67	79	68	88	76	94	81	92	90	81	73	80	39	43	27	25	50	42	13	4	1	27	21	17	2	0	1	7	2	0	14	10	39	20	32	30
CH243	A3.12	000_Emulsion control tL	81	64	80	94	81	67	97	99	90	85	111	94	89	80	79	60	62	59	51	53	42	47	60	52	33	46	45	32	51	43	6	16	4	8	2	0	0	0	2	0	1	9	29	55	63	51	80
CH244	A3.13	000_Emulsion control tL	86	102	84	97	75	61	69	78	82	86	53	70	55	58	46	66	57	59	59	54	57	50	72	84	70	94	105	62	74	57	66	53	107	96	79	37	62	29	27	22	54	50	58	69	117	135	149
CH246	B3.8	003_400ug CBD	40	27	17	24	47	71	27	51	50	30	30	56	68	57	49	67	62	59	75	60	84	53	39	54	81	21	17	54	38	34	68	71	48	70	47	41	0	0	2	0	0	1	1	0	6	7	31
CH247	B3.9	003_400ug CBD	58	34	33	23	44	39	40	43	40	41	36	19	33	77	33	47	60	37	53	67	52	86	77	26	39	17	27	1	36	43	49	6	25	50	38	23	29	125	113	72	105	67	6	19	16	1	20
CH248	B3.10	003_400ug CBD	82	31	13	28	29	17	52	14	14	31	53	45	49	41	50	17	63	29	99	56	47	35	56	23	6	97	47	46	6	23	24	12	5	23	12	11	4	65	0	0	0	6	0	10	15	5	16
CH249	B3.11	003_400ug CBD	43	24	32	23	21	29	26	29	18	16	18	51	56	45	47	30	24	44	31	23	20	15	18	23	10	16	10	20	26	7	22	3	6	5	49	1	1	1	25	0	0	0	0	11	8	12	33
CH251	C3.9	002_300ug CBD	17	17	10	5	30	29	15	22	32	21	29	32	29	50	25	39	36	42	41	22	42	56	65	46	35	54	33	23	40	39	16	11	14	10	2	15	7	7	3	0	2	0	0	0	1	0	4
CH252	C3.10	002_300ug CBD	44	32	23	28	42	23	76	36	82	48	74	44	78	82	39	72	78	69	54	87	53	67	57	20	57	38	85	91	73	34	79	41	64	56	83	84	182	54	77	22	39	42	12	4	8	5	39
CH253	C3.11	002_300ug CBD	58	43	22	19	10	46	44	32	31	45	28	39	45	18	46	28	41	65	48	61	26	39	55	26	20	16	38	39	32	54	53	69	25	12	14	38	38	7	2	0	2	1	0	1	1	15	7
CH254	C3.12	002_300ug CBD	27	6	2	5	24	15	9	8	32	24	22	15	21	39	23	13	25	31	22	16	26	26	8	14	36	26	7	14	18	5	7	18	14	17	10	11	2	17	14	8	0	0	1	0	4	6	11
CH255	C3.13	002_300ug CBD	39	10	8	12	18	7	11	37	59	51	56	50	48	44	27	25	30	17	57	35	15	41	38	37	26	13	6	25	8	6	10	9	42	12	11	25	4	2	8	4	0	2	0	6	4	16	37
CH257	A3.14	000_Emulsion control tL	34	50	54	39	71	41	73	59	72	64	46	76	81	64	83	65	58	47	49	28	51	33	45	60	10	26	22	21	13	21	11	2	5	4	9	0	40	147	94	158	108	68	97	140	54	43	22
CH258	A3.15	000_Emulsion control tL	53	38	28	30	81	66	69	75	81	57	59	69	73	54	46	46	60	51	49	36	26	21	32	24	23	32	15	9	11	16	4	3	3	3	31	0	0	1	0	1	3	11	6	20	39	59	47
CH259	A3.16	000_Emulsion control tL	66	43	81	112	92	82	102	103	89	106	83	81	115	83	90	102	94	98	74	71	77	96	60	52	66	50	99	79	47	12	55	31	34	27	77	30	31	18	26	51	42	74	109	129	142	143	177
CH262	B3.12	003_400ug CBD	23	16	40	33	6	15	10	28	19	40	23	55	76	69	70	79	77	100	115	116	81	113	110	76	67	35	107	88	75	109	149	118	92	161	214	203	146	54	125	38	3	0	39	30	12	29	70
CH263	B3.13	003_400ug CBD	33	35	5	4	12	27	9	35	23	19	25	21	39	23	44	17	74	47	72	36	58	64	64	22	45	51	59	14	29	19	9	51	44	27	44	46	54	48	25	4	6	12	1	6	5	44	25
CH264	B3.14	003_400ug CBD	35	43	4	24	22	13	27	20	35	26	33	72	40	41	37	12	55	63	51	49	60	33	10	36	66	14	26	41	106	20	60	50	20	32	17	18	22	3	8	60	41	0	3	0	21	7	29
CH265	B3.15	003_400ug CBD	34	25	10	17	21	17	45	44	69	56	61	20	61	80	73	62	97	44	60	70	46	22	50	35	31	54	44	30	33	10	14	19	21	77	35	17	17	1	0	3	0	3	5	23	55	69	70
CH268	C3.14	002_300ug CBD	50	27	28	5	12	32	57	59	66	90	86	75	48	54	83	95	61	80	79	58	76	61	66	63	60	89	82	76	94	110	106	173	127	102	105	209	235	184	153	131	151	137	149	91	144	177	92
CH269	C3.15	002_300ug CBD	49	52	61	33	54	43	36	37	59	41	65	59	58	55	17	65	84	57	65	40	50	24	49	27	13	38	50	43	21	13	68	67	41	77	46	60	39	38	4	0	7	2	2	7	12	31	49
CH270	C3.16	002_300ug CBD	30	12	4	11	10	8	21	40	22	18	24	56	61	37	32	64	28	10	47	21	15	25	6	9	23	70	55	12	18	6	13	2	6	9	17	12	3	0	19	1	2	1	1	13	11	10	15
CH289	A4.0	001_Tween Control	23	19	16	18	35	31	23	22	20	43	39	34	40	35	42	63	45	38	25	44	16	40	50	44	39	65	19	17	14	21	22	26	9	11	0	11	3	2	5	4	8	14	4	14	14	11	34
CH290	A4.1	001_Tween Control	43	78	67	69	69	52	43	64	82	74	67	66	65	66	72	104	93	73	39	69	77	132	99	65	48	39	49	13	22	24	33	31	8	53	24	2	5	7	7	54	31	14	1	13	14	3	39
CH295	B4.0	000_Emulsion control tL	73	64	73	58	35	45	36	50	53	33	65	56	63	67	55	47	53	53	31	65	78	57	49	30	30	37	37	27	56	28	13	9	5	1	1	0	1	7	2	0	0	2	1	4	2	8	11
CH296	B4.1	000_Emulsion control tL	60	53	38	47	52	36	28	46	44	46	30	61	39	48	24	46	40	40	43	40	53	47	47	33	35	16	85	99	89	41	57	106	55	27	18	5	11	0	1	1	8	9	11	7	13	9	14
CH301	C4.0	003_400ug CBD	81	39	35	43	86	47	51	75	91	133	87	123	91	51	32	61	57	60	27	38	20	12	46	44	21	26	55	38	8	12	57	97	48	29	9	7	28	14	28	3	1	4	1	4	0	5	9
CH302	C4.1	003_400ug CBD	46	24	4	0	34	31	30	9	21	8	28	19	11	10	33	7	30	7	30	21	13	9	21	34	28	7	13	5	7	5	1	5	7	4	5	2	8	5	1	7	18	2	4	0	0	0	5
CH304	A4.2	001_Tween Control	22	18	27	24	55	66	73	59	42	55	67	72	59	54	44	82	62	56	74	95	83	127	133	145	132	135	171	129	129	107	65	34	8	8	61	90	132	83	4	3	20	16	7	13	8	9	15
CH305	A4.3	001_Tween Control	35	24	26	45	40	41	62	70	65	71	72	82	75	69	52	68	41	37	45	29	20	39	39	20	18	11	15	11	6	8	26	188	170	24	25	6	0	2	0	0	2	12	6	13	9	13	10
CH306	A4.4	001_Tween Control	69	57	57	64	67	55	68	61	65	85	73	79	76	62	67	68	53	50	36	24	38	14	18	23	31	20	9	20	30	3	1	4	3	8	5	10	5	6	6	3	15	5	21	35	15	6	6
CH307	A4.5	001_Tween Control	62	50	61	46	49	42	30	44	44	49	50	45	50	62	51	36	49	55	33	36	21	34	11	27	63	6	15	12	10	6	6	3	5	7	3	4	3	3	3	4	7	8	15	7	15	9	27
CH310	B4.2	000_Emulsion control tL	57	52	61	44	40	35	36	56	80	78	58	88	87	71	63	77	115	76	88	61	45	61	35	48	77	96	73	50	25	26	50	11	16	9	32	3	0	1	0	0	0	4	1	8	13	60	71
CH311	B4.3	000_Emulsion control tL	66	67	51	39	49	41	52	34	37	47	74	36	86	74	54	60	42	36	51	35	22	22	17	25	18	12	21	7	22	3	7	33	39	11	3	2	1	0	0	0	0	0	2	7	6	14	6
CH312	B4.4	000_Emulsion control tL	64	47	46	49	49	48	42	41	70	45	45	49	79	58	65	73	47	36	41	55	47	28	29	19	15	7	11	3	0	3	4	0	11	0	0	3	0	5	0	1	0	1	1	4	18	10	12
CH313	B4.5	000_Emulsion control tL	59	39	55	59	66	51	40	48	75	63	49	52	66	47	45	37	57	32	29	45	33	28	16	63	32	33	33	38	15	11	10	7	4	0	1	2	1	2	3	18	63	85	98	146	69	19	28
CH316	C4.2	003_400ug CBD	114	64	57	79	74	65	53	68	74	39	25	54	51	89	82	103	68	60	69	64	48	63	88	55	59	112	52	34	34	11	27	50	22	29	29	12	24	25	7	28	32	12	19	16	14	30	59
CH317	C4.3	003_400ug CBD	48	44	15	12	1	11	12	9	36	16	12	38	33	30	36	32	32	15	58	35	22	64	49	27	27	30	3	13	7	4	17	16	6	17	23	20	6	2	2	5	5	9	0	0	3	3	3
CH318	C4.4	003_400ug CBD	24	6	6	5	5	13	3	13	7	19	6	10	9	14	25	9	21	15	6	17	14	11	9	18	10	2	2	10	2	9	3	8	8	4	7	9	4	0	0	4	0	0	0	0	0	7	21
CH319	C4.5	003_400ug CBD	29	6	11	5	28	10	14	34	21	43	45	60	58	40	48	23	23	31	31	99	35	22	18	20	51	64	44	103	8	38	50	54	37	49	51	46	6	1	2	0	0	0	0	2	1	4	6
CH320	A4.6	001_Tween Control	27	34	38	28	46	51	49	44	60	73	64	48	60	69	46	54	47	75	60	39	40	12	15	10	17	21	8	11	12	3	1	3	3	1	8	9	2	2	1	0	0	2	2	2	3	3	10
CH321	A4.7	001_Tween Control	34	27	44	25	36	54	62	62	73	74	75	88	70	74	61	83	43	59	49	38	26	18	21	11	11	8	0	0	2	4	4	3	4	3	0	0	0	0	8	0	1	0	0	3	3	9	20
CH322	A4.8	001_Tween Control	52	44	36	45	56	83	69	69	80	99	82	86	81	72	90	54	51	50	47	35	22	20	16	13	25	7	5	4	4	0	6	1	3	8	0	2	0	0	0	0	1	1	3	4	6	13	24
CH323	A4.9	001_Tween Control	65	68	67	78	94	53	64	82	96	86	93	83	89	79	87	77	55	54	60	67	66	31	23	19	42	36	27	10	9	8	0	2	3	8	2	0	5	12	0	8	0	2	5	6	10	20	19
CH324	A4.10	001_Tween Control	101	99	156	131	105	79	106	106	121	89	96	96	91	100	102	94	103	107	108	115	129	98	101	102	95	97	67	118	80	67	81	57	55	33	17	52	166	155	138	125	123	120	64	69	67	66	85
CH326	B4.6	000_Emulsion control tL	37	47	36	43	43	24	61	44	59	57	60	47	63	58	68	60	40	42	55	34	47	38	44	47	28	30	11	7	22	23	34	140	168	60	26	12	3	12	0	0	4	17	9	9	5	9	12
CH327	B4.7	000_Emulsion control tL	54	29	34	15	20	46	46	42	50	49	59	44	74	44	55	76	51	39	46	41	39	30	23	24	22	8	18	15	7	3	2	0	0	2	2	6	2	50	0	0	0	13	3	13	6	17	20
CH328	B4.8	000_Emulsion control tL	60	22	43	33	41	55	44	49	64	68	83	67	66	67	52	67	55	67	43	30	25	35	23	11	20	6	35	11	12	6	4	11	9	0	1	0	0	2	0	0	0	0	4	16	7	11	25
CH329	B4.9	000_Emulsion control tL	47	34	28	69	67	56	97	81	83	64	73	92	65	48	66	62	54	42	56	32	72	39	44	48	17	20	27	23	7	3	29	0	1	22	3	0	1	3	0	0	2	0	19	9	4	19	19
CH331	C4.6	003_400ug CBD	69	62	52	63	92	85	71	55	85	112	67	105	73	90	100	92	73	89	93	92	93	104	101	112	79	90	111	48	43	104	106	53	164	116	152	103	103	76	92	116	64	2	8	0	0	8	16
CH332	C4.7	003_400ug CBD	70	57	24	17	26	46	67	62	40	24	45	96	70	37	66	60	57	69	34	39	53	26	49	19	17	18	0	51	14	16	45	38	41	30	44	9	22	38	12	6	12	20	6	0	4	4	6
CH333	C4.8	003_400ug CBD	63	19	24	21	13	17	26	34	59	41	61	34	27	54	40	26	44	25	20	30	33	69	40	23	77	12	26	2	37	11	11	26	16	32	9	16	15	0	0	0	0	0	0	7	22	2	8
CH334	C4.9	003_400ug CBD	22	23	9	8	4	6	7	33	6	18	7	10	12	25	21	38	32	18	43	20	33	23	17	19	8	18	12	17	3	4	6	20	4	3	8	4	2	9	0	28	0	0	22	30	6	2	5
CH335	C4.10	003_400ug CBD	19	3	6	28	21	22	13	14	14	36	24	49	41	25	17	31	67	36	29	30	30	42	37	26	34	19	18	52	15	9	17	14	18	9	47	18	20	9	0	6	23	18	2	0	18	4	10
CH336	A4.11	001_Tween Control	26	26	26	10	28	39	63	44	59	66	71	64	62	59	42	48	25	58	28	33	45	24	6	13	8	6	3	20	65	29	8	4	4	0	0	0	0	0	0	0	0	53	0	2	13	22	14
CH337	A4.12	001_Tween Control	45	27	14	27	32	60	52	46	70	54	82	73	61	67	49	75	45	40	45	27	28	37	8	3	23	25	5	5	0	0	0	6	0	2	0	2	0	0	0	0	0	0	0	3	11	0	14
CH338	A4.13	001_Tween Control	41	21	62	55	73	80	90	105	104	107	108	110	117	104	79	99	72	81	77	59	40	45	24	20	29	34	16	14	6	12	4	6	0	0	3	0	0	0	0	0	4	0	2	10	22	51	36
CH339	A4.14	001_Tween Control	47	55	50	84	105	112	71	90	95	78	87	77	98	91	75	63	73	81	62	45	42	37	29	32	29	22	19	38	15	11	10	11	6	1	1	1	4	0	0	0	3	4	20	24	33	46	60
CH342	B4.10	000_Emulsion control tL	37	39	38	44	67	66	51	87	65	48	57	57	103	56	64	69	85	88	64	86	81	87	49	92	79	53	88	129	88	47	34	30	61	17	18	12	2	1	4	10	3	4	6	12	4	10	40
CH343	B4.11	000_Emulsion control tL	36	29	18	42	24	48	29	47	49	72	56	76	59	73	46	64	39	52	38	41	37	32	31	31	20	22	19	15	13	11	4	11	5	2	0	3	2	6	0	0	2	4	3	4	29	29	72
CH344	B4.12	000_Emulsion control tL	45	20	36	40	49	72	71	92	87	95	96	88	65	75	59	77	55	65	70	45	31	24	32	14	28	28	7	7	25	7	1	3	1	2	9	7	2	0	0	0	1	1	3	7	8	27	40
CH345	B4.13	000_Emulsion control tL	33	25	35	47	80	57	76	91	73	79	51	75	64	62	80	55	63	39	55	42	56	35	44	27	23	19	39	25	51	19	9	13	24	7	53	21	7	2	1	0	0	2	8	26	48	64	82
CH348	C4.11	003_400ug CBD	18	27	33	57	42	50	6	16	30	21	48	23	37	44	40	53	30	63	38	46	61	63	29	76	27	56	35	20	34	24	35	27	50	14	64	35	46	41	38	10	2	4	0	2	0	19	24
CH349	C4.12	003_400ug CBD	63	20	20	14	18	6	25	14	20	66	15	21	43	57	71	20	83	25	68	51	54	30	47	59	31	23	10	16	4	11	16	13	24	43	36	16	27	36	27	3	0	0	0	32	1	4	9
CH350	C4.13	003_400ug CBD	28	9	2	8	17	11	22	18	8	17	4	32	22	42	41	53	37	35	34	32	47	41	33	31	41	26	9	32	16	2	25	23	15	20	5	6	39	1	0	17	0	0	0	0	0	0	4
CH351	C4.14	003_400ug CBD	17	4	6	1	10	6	2	13	15	27	29	46	44	80	22	25	46	54	38	26	52	46	31	22	21	14	39	57	43	17	41	43	16	33	15	38	17	11	15	2	39	6	0	7	10	22	42
CH353	A4.15	001_Tween Control	33	27	61	39	51	76	81	85	94	82	99	86	122	86	80	93	94	56	33	114	88	67	83	99	78	33	32	9	9	3	7	10	4	3	4	3	0	0	0	0	5	3	4	15	35	14	31
CH354	A4.16	001_Tween Control	36	33	31	46	65	53	72	71	67	64	66	57	69	57	69	66	42	42	37	46	56	62	28	28	28	20	27	19	22	13	5	3	8	1	8	35	34	1	2	0	3	6	16	19	29	38	60
CH359	B4.14	000_Emulsion control tL	26	60	49	53	43	73	83	74	73	74	75	82	67	55	77	84	106	82	65	72	73	99	66	105	91	76	44	34	35	45	65	79	30	12	4	120	72	0	5	24	88	13	21	31	19	16	28
CH360	B4.15	000_Emulsion control tL	22	30	22	32	44	53	64	65	65	64	66	77	63	61	85	81	51	63	56	52	51	55	38	31	30	23	46	25	3	12	24	10	15	10	14	7	4	0	0	5	2	5	21	15	46	42	37
CH365	C4.15	003_400ug CBD	29	7	17	18	20	24	23	41	23	26	9	4	21	22	39	27	37	40	78	27	67	18	30	38	39	57	41	143	15	28	24	39	29	11	47	47	101	102	94	65	169	155	187	123	96	64	23
CH366	C4.16	003_400ug CBD	21	32	1	21	1	19	37	8	11	14	8	25	45	40	27	10	17	43	54	12	24	32	29	25	32	43	77	48	6	25	14	110	58	99	140	148	31	144	49	40	44	20	24	24	27	25	23
[truncated: 99 more columns]

## Sheet: CBD ex3 tR
DATE:	2023-06-16 12:03:57
FILE:	C:\Software\WMicrotracker One\wmicrotracker_w8_v30api\wmicrotracker\p00027\20230613_1054
SUBPROJECT:	2023 0616 wDAT 500-1000ug CBD tR
<<<<<< Group Activity: Average Activity Counts per Data Interval>>>>>>
Group/Time[m]	30	60	90	120	150	180	210	240	270	300	330	360	390	420	450	480	510	540	570	600	630	660	690	720	750	780	810	840	870	900	930	960	990	1020	1050	1080	1110	1140	1170	1200	1230	1260	1290	1320	1350	1380	1410	1440	1470
000_Emulstion Control tR	46	37	39	45	50	50	53	55	59	58	57	60	61	60	60	63	57	57	50	47	45	43	38	37	35	33	30	31	26	21	21	17	16	18	18	15	13	9	6	7	8	8	11	16	22	27	31	37	39
001_500ug CBD	46	23	18	17	22	21	18	18	21	27	24	25	27	28	28	26	29	28	29	32	30	26	27	28	29	30	24	24	24	26	24	26	25	23	27	26	23	26	18	15	11	13	12	12	15	16	18	19	28
002_750ug CBD	46	21	13	17	24	19	16	14	21	22	15	15	19	20	24	24	23	23	24	27	24	21	26	25	19	18	24	23	22	25	22	27	24	24	24	23	22	19	18	20	17	21	20	16	16	15	16	17	16
003_1000ug CBD	43	18	10	12	16	19	14	14	17	20	9	9	13	17	14	17	20	21	24	18	20	18	18	18	19	20	18	17	20	19	22	23	19	15	17	21	18	15	21	21	23	21	22	15	17	19	20	14	19
<<<<<< Group Activity: Standard Error >>>>>>
Group/Time[m]	30	60	90	120	150	180	210	240	270	300	330	360	390	420	450	480	510	540	570	600	630	660	690	720	750	780	810	840	870	900	930	960	990	1020	1050	1080	1110	1140	1170	1200	1230	1260	1290	1320	1350	1380	1410	1440	1470
000_Emulstion Control tR	7.5	6.9	6.4	2.3	3.5	3.5	5.8	4.6	6.9	4.6	5.2	6.9	5.2	5.2	5.2	4.6	5.2	3.5	5.2	4.6	2.3	1.7	2.3	1.7	0.6	0.6	1.2	3.5	4.6	1.7	1.2	1.7	0.6	4	1.7	1.7	3.5	1.2	1.7	2.3	3.5	1.7	2.3	4.6	3.5	3.5	2.3	2.9	2.3
001_500ug CBD	5.8	1.7	1.2	1.7	2.3	2.3	1.7	1.2	2.3	1.7	0.6	1.2	2.3	3.5	3.5	3.5	2.3	2.9	3.5	4.6	4	3.5	4	3.5	3.5	3.5	3.5	0.6	2.9	3.5	2.9	1.7	5.8	2.3	2.9	2.3	1.2	1.2	1.2	1.2	2.3	2.3	2.3	3.5	4.6	5.2	4	0.6	1.2
002_750ug CBD	4.6	3.5	2.3	2.3	3.5	3.5	3.5	4.6	6.4	5.2	5.2	5.8	5.2	2.9	4.6	4.6	5.8	4.6	7.5	6.9	6.9	6.4	5.2	5.8	6.4	6.9	10.4	8.7	8.1	8.1	4.6	6.4	2.3	5.8	6.9	5.2	5.8	4.6	6.4	8.7	5.2	5.8	5.2	6.4	2.9	3.5	4.6	5.2	1.7
003_1000ug CBD	5.2	1.2	1.2	2.3	1.2	4.6	2.9	4	4	2.9	1.2	1.7	0.6	3.5	2.9	3.5	2.9	1.7	3.5	3.5	2.3	2.3	2.9	2.9	4.6	4	2.9	1.2	1.2	1.7	0.6	1.7	2.3	0.6	4.6	0.6	4	1.2	2.9	1.2	5.2	5.2	6.9	2.3	2.3	6.4	6.9	4.6	3.5
<<<<<< Group Activity: Number of wells/group >>>>>>
Group/Time[m]	30	60	90	120	150	180	210	240	270	300	330	360	390	420	450	480	510	540	570	600	630	660	690	720	750	780	810	840	870	900	930	960	990	1020	1050	1080	1110	1140	1170	1200	1230	1260	1290	1320	1350	1380	1410	1440	1470
000_Emulstion Control tR	3	3	3	3	3	3	3	3	3	3	3	3	3	3	3	3	3	3	3	3	3	3	3	3	3	3	3	3	3	3	3	3	3	3	3	3	3	3	3	3	3	3	3	3	3	3	3	3	3
001_500ug CBD	3	3	3	3	3	3	3	3	3	3	3	3	3	3	3	3	3	3	3	3	3	3	3	3	3	3	3	3	3	3	3	3	3	3	3	3	3	3	3	3	3	3	3	3	3	3	3	3	3
002_750ug CBD	3	3	3	3	3	3	3	3	3	3	3	3	3	3	3	3	3	3	3	3	3	3	3	3	3	3	3	3	3	3	3	3	3	3	3	3	3	3	3	3	3	3	3	3	3	3	3	3	3
003_1000ug CBD	3	3	3	3	3	3	3	3	3	3	3	3	3	3	3	3	3	3	3	3	3	3	3	3	3	3	3	3	3	3	3	3	3	3	3	3	3	3	3	3	3	3	3	3	3	3	3	3	3
<<<<<< Number of Samples per Acquisition Interval [1unit=500values] >>>>>>
Time[m]	30	60	90	120	150	180	210	240	270	300	330	360	390	420	450	480	510	540	570	600	630	660	690	720	750	780	810	840	870	900	930	960	990	1020	1050	1080	1110	1140	1170	1200	1230	1260	1290	1320	1350	1380	1410	1440	1470
#Samples	30	30	30	30	30	30	30	30	30	30	30	30	30	30	30	30	30	30	30	30	30	30	30	30	30	30	30	30	30	30	30	30	30	30	30	30	30	30	30	30	30	30	30	30	30	30	30	30	30
<<<<<< Average Temperature [°C] >>>>>>
Time[m]	30	60	90	120	150	180	210	240	270	300	330	360	390	420	450	480	510	540	570	600	630	660	690	720	750	780	810	840	870	900	930	960	990	1020	1050	1080	1110	1140	1170	1200	1230	1260	1290	1320	1350	1380	1410	1440	1470
Temp[°C]	22.3	22.6	22.6	22.8	22.8	22.8	22.8	22.8	22.8	22.8	22.8	22.8	22.8	22.8	22.8	22.8	22.8	22.8	22.8	22.8	22.8	22.8	22.8	22.8	22.8	22.6	22.8	22.8	22.8	22.8	22.8	22.8	22.8	22.8	22.8	22.8	22.8	22.8	22.8	22.8	22.8	22.8	22.8	22.8	22.8	22.8	22.8	22.8	22.8
<<<<<< Well Activity >>>>>>
Well	Group/Time[m]	30	60	90	120	150	180	210	240	270	300	330	360	390	420	450	480	510	540	570	600	630	660	690	720	750	780	810	840	870	900	930	960	990	1020	1050	1080	1110	1140	1170	1200	1230	1260	1290	1320	1350	1380	1410	1440
A1	002_750ug CBD	37	21	9	15	21	12	9	5	11	12	6	7	11	15	16	17	13	14	9	13	11	8	15	16	9	6	9	10	7	9	14	16	20	13	11	13	11	10	5	5	7	9	10	9	12	10	8	8
B1	001_500ug CBD	47	27	19	15	17	17	15	17	18	24	25	23	23	23	22	20	26	23	22	24	24	22	21	21	26	25	18	23	20	19	18	24	15	20	23	26	25	24	15	17	10	11	17	17	24	24	26	18
C1	000_Emulstion Control tR	43	30	31	42	46	44	43	47	47	51	51	49	52	52	53	56	47	50	40	38	42	41	42	34	34	33	28	25	17	18	23	15	16	13	15	15	9	7	8	6	3	6	7	7	15	20	27	31
A2	003_1000ug CBD	35	16	10	15	16	17	10	7	12	20	8	10	14	13	17	19	24	21	18	12	16	15	13	12	10	12	14	16	22	17	21	22	16	14	9	20	12	14	23	22	14	16	11	11	12	8	9	7
B2	002_750ug CBD	50	15	16	15	20	23	18	17	19	24	15	12	17	20	24	24	22	26	33	33	28	26	30	35	16	20	19	20	25	31	22	28	28	30	33	29	29	22	22	22	23	25	26	11	15	15	15	17
C2	001_500ug CBD	55	22	16	21	25	25	21	20	20	29	25	26	31	35	33	31	33	32	33	40	30	32	35	33	35	36	30	25	29	31	26	25	26	27	33	30	21	27	19	14	15	18	10	6	9	7	13	20
A3	000_Emulstion Control tR	35	30	35	43	47	50	53	55	59	55	53	60	62	60	58	62	61	60	53	49	49	43	34	37	36	33	31	30	29	22	22	21	17	16	20	18	20	11	8	12	14	11	14	21	25	32	30	40
B3	003_1000ug CBD	53	19	11	13	17	28	19	20	25	24	12	12	12	23	17	22	21	24	30	22	23	16	23	22	26	26	23	19	19	22	22	26	24	16	25	22	25	18	24	19	32	32	35	16	20	18	18	12
C3	002_750ug CBD	51	26	14	22	30	22	21	21	32	29	24	27	28	24	32	32	33	28	30	35	34	29	32	24	31	29	44	39	35	35	29	37	24	30	28	26	26	26	26	34	20	28	23	29	21	21	24	25
A4	001_500ug CBD	35	21	18	16	23	22	18	18	25	27	23	25	28	26	29	28	28	28	32	33	37	23	26	30	25	28	25	24	22	28	28	30	35	22	26	22	23	26	19	14	8	11	9	12	13	18	14	18
B4	000_Emulstion Control tR	61	50	51	50	56	56	63	63	70	67	67	72	70	69	70	71	64	61	57	53	43	46	39	40	36	34	30	37	32	23	19	15	16	26	20	13	10	9	2	4	6	6	13	21	27	28	35	40
C4	003_1000ug CBD	41	19	8	8	14	12	14	14	14	15	8	6	13	14	8	11	14	18	23	21	22	23	19	19	20	22	17	17	19	18	22	21	17	16	18	20	17	14	15	23	22	16	19	18	18	30	33	23
<<<<<< Channel Activity >>>>>>
Channel	Well	Group/Time[m]	30	60	90	120	150	180	210	240	270	300	330	360	390	420	450	480	510	540	570	600	630	660	690	720	750	780	810	840	870	900	930	960	990	1020	1050	1080	1110	1140	1170	1200	1230	1260	1290	1320	1350	1380	1410
CH17	A1.0	002_750ug CBD	31	21	0	0	0	0	0	0	0	1	0	0	0	0	0	0	0	0	0	0	0	0	0	0	0	0	0	0	0	0	0	0	0	0	0	0	0	0	0	0	0	0	0	0	0	0	0
CH18	A1.1	002_750ug CBD	29	20	6	0	24	16	1	2	10	22	3	1	15	20	6	15	12	1	6	0	3	8	15	75	0	0	5	0	1	1	1	3	20	23	1	3	3	1	0	0	0	1	0	0	2	3	11
CH23	B1.0	001_500ug CBD	12	6	1	0	0	0	0	0	0	1	0	0	0	0	0	0	0	0	0	0	0	0	0	0	0	0	0	0	0	0	0	0	0	0	0	0	0	0	0	0	0	0	0	0	0	0	0
CH24	B1.1	001_500ug CBD	19	19	6	1	1	4	0	2	8	10	3	5	13	3	5	6	9	2	2	9	0	5	0	2	0	9	5	9	2	47	18	14	0	1	0	0	2	9	18	6	0	1	16	14	4	4	24
CH29	C1.0	000_Emulstion Control tR	21	13	17	41	55	61	59	22	12	12	14	4	8	9	23	15	9	4	40	6	10	6	1	1	0	0	2	0	0	27	0	0	0	0	0	0	0	0	0	0	0	0	2	0	0	0	1
CH30	C1.1	000_Emulstion Control tR	43	22	39	73	71	51	55	63	72	65	74	106	92	76	99	92	85	88	82	61	74	76	109	99	92	97	107	54	40	58	123	56	47	27	5	19	11	4	14	4	2	20	31	28	33	26	21
CH32	A1.2	002_750ug CBD	24	19	19	42	19	10	0	0	4	3	0	0	0	0	0	0	0	3	16	1	4	1	1	1	0	0	0	0	0	0	0	0	0	0	0	1	0	0	0	0	0	0	2	0	1	4	0
CH33	A1.3	002_750ug CBD	42	23	11	20	48	8	24	7	17	10	7	0	8	0	4	0	0	9	5	17	11	8	13	10	0	2	9	5	0	2	21	10	19	13	8	4	34	22	0	0	23	26	55	40	32	3	0
CH34	A1.4	002_750ug CBD	29	16	2	6	6	6	2	2	12	9	2	2	6	4	4	2	0	0	1	10	2	0	0	0	5	1	0	2	1	0	0	0	1	0	0	0	0	4	1	1	0	0	0	2	2	2	1
CH35	A1.5	002_750ug CBD	34	11	0	0	0	0	0	0	0	4	0	0	0	0	0	0	0	0	0	0	0	0	0	0	0	0	0	0	0	0	0	0	0	0	0	0	0	0	0	0	0	0	0	0	0	0	0
CH38	B1.2	001_500ug CBD	19	27	31	16	13	16	12	24	41	51	37	65	34	5	28	9	4	12	5	29	13	29	18	2	47	2	12	44	0	10	49	69	24	17	8	2	0	0	0	0	0	0	0	0	0	2	0
CH39	B1.3	001_500ug CBD	58	15	4	5	4	22	8	8	6	17	13	0	23	6	10	30	18	16	26	2	3	5	3	2	18	29	0	18	0	20	28	23	1	1	35	5	8	14	3	38	16	11	7	2	0	0	10
CH40	B1.4	001_500ug CBD	41	30	42	33	17	11	3	11	32	10	24	49	9	20	22	4	23	3	1	12	8	15	1	8	13	49	3	0	4	7	3	0	3	6	6	20	9	0	0	0	0	1	1	2	5	0	0
CH41	B1.5	001_500ug CBD	37	48	18	18	14	5	4	10	38	43	0	5	3	9	25	24	39	36	20	44	67	27	40	91	12	16	13	5	46	9	17	0	21	27	9	9	10	12	8	0	0	0	1	0	0	6	2
CH44	C1.2	000_Emulstion Control tR	28	32	28	36	27	35	46	41	37	46	39	34	40	55	38	64	51	26	34	36	61	30	32	17	28	26	13	17	8	4	20	2	3	4	0	13	0	0	0	23	2	0	2	3	3	12	9
CH45	C1.3	000_Emulstion Control tR	44	21	11	26	30	32	35	32	41	44	38	32	55	52	64	59	63	49	33	46	55	32	50	24	50	26	20	14	14	2	11	3	0	0	0	0	0	1	0	0	0	0	0	1	0	5	11
CH46	C1.4	000_Emulstion Control tR	39	16	26	39	36	35	30	54	72	57	83	65	71	99	103	103	77	101	73	90	65	72	67	60	43	32	19	36	8	3	8	9	2	2	2	2	2	0	0	0	0	0	0	0	7	13	11
CH47	C1.5	000_Emulstion Control tR	30	24	50	61	72	73	70	81	87	101	94	107	80	81	86	85	83	68	61	64	63	68	80	76	70	49	66	30	27	24	51	72	17	42	43	9	1	0	42	29	0	4	2	7	48	30	62
CH48	A1.6	002_750ug CBD	59	9	42	45	75	40	26	8	53	26	14	21	22	36	20	53	17	36	16	22	39	9	11	0	3	0	1	0	0	0	5	0	0	0	0	0	3	0	0	0	0	0	0	3	0	0	0
CH49	A1.7	002_750ug CBD	28	6	0	2	14	3	7	0	15	14	2	2	11	5	1	5	3	4	9	2	7	0	0	2	15	0	1	2	5	3	2	2	2	0	0	0	0	0	0	0	1	0	9	0	0	1	1
CH50	A1.8	002_750ug CBD	50	8	8	8	18	12	3	0	2	11	2	0	1	3	19	5	2	3	6	24	12	7	31	12	11	2	3	12	7	9	0	2	2	1	10	0	13	3	0	0	0	0	0	1	4	0	0
CH51	A1.9	002_750ug CBD	74	16	12	3	26	16	13	3	15	20	17	12	12	21	34	29	32	11	16	3	18	25	15	21	0	0	12	9	8	5	18	7	16	19	13	17	15	6	9	24	0	2	0	0	0	0	0
CH52	A1.10	002_750ug CBD	22	2	2	3	0	9	0	0	5	4	1	3	2	0	4	5	4	4	2	2	2	9	14	2	0	0	6	0	0	3	1	8	2	2	0	0	0	3	2	0	1	1	0	1	0	0	4
CH54	B1.6	001_500ug CBD	39	34	17	15	12	21	5	0	2	2	0	0	0	2	0	2	8	6	1	18	0	0	0	0	0	0	0	0	0	3	0	0	0	0	0	2	3	1	0	0	0	0	0	0	0	0	0
CH55	B1.7	001_500ug CBD	41	31	8	12	24	45	29	50	35	34	9	6	21	70	26	12	12	14	34	17	15	21	6	14	41	35	18	33	19	23	20	15	31	24	34	8	4	11	15	0	1	6	3	2	3	0	10
CH56	B1.8	001_500ug CBD	81	24	23	9	11	9	8	5	3	26	41	36	14	23	36	30	25	18	26	13	12	12	56	22	3	10	36	38	12	10	2	14	1	5	0	4	2	0	0	0	0	2	5	3	7	0	0
CH57	B1.9	001_500ug CBD	41	8	4	10	26	4	2	14	14	17	5	15	22	14	17	15	22	3	5	9	16	42	13	11	2	20	12	42	26	6	11	16	3	9	4	32	13	9	0	1	10	0	0	0	16	1	0
CH59	C1.6	000_Emulstion Control tR	28	1	0	1	0	0	0	0	0	2	0	0	0	0	0	0	0	0	0	0	0	0	0	0	0	0	0	0	0	1	0	0	0	0	0	0	0	0	0	0	0	0	0	0	0	0	0
CH60	C1.7	000_Emulstion Control tR	43	31	34	15	14	28	34	37	42	54	41	36	44	32	42	31	46	60	32	18	25	25	18	6	12	5	13	7	5	5	0	5	2	3	4	0	0	4	0	0	0	0	1	7	5	14	5
CH61	C1.8	000_Emulstion Control tR	48	46	19	25	16	32	40	25	40	49	53	39	51	60	56	78	54	42	34	45	41	46	37	24	31	31	16	20	12	8	7	0	0	4	7	0	0	0	0	0	0	0	6	5	27	21	12
CH62	C1.9	000_Emulstion Control tR	29	32	23	25	40	26	20	43	40	55	51	51	57	45	49	55	41	79	34	61	58	50	49	54	48	68	64	29	18	57	16	7	16	6	6	5	3	5	8	1	0	1	5	2	2	6	9
CH63	C1.10	000_Emulstion Control tR	40	54	45	68	82	47	62	68	76	93	75	79	86	64	71	78	49	73	47	55	64	69	55	54	56	88	58	73	30	36	33	32	49	29	53	52	26	5	0	6	7	1	3	20	59	70	111
CH64	A1.11	002_750ug CBD	34	55	22	10	3	0	5	0	2	1	0	0	0	0	0	1	0	0	0	0	0	0	1	0	4	0	0	0	0	0	4	6	0	0	0	1	0	0	0	0	0	0	0	0	0	33	20
CH65	A1.12	002_750ug CBD	26	18	8	17	24	13	27	34	17	28	6	20	48	43	74	57	79	88	30	62	47	37	70	50	45	34	82	68	47	34	97	135	164	110	59	90	66	46	8	18	20	1	6	25	35	18	3
CH66	A1.13	002_750ug CBD	58	33	3	18	21	17	8	9	20	27	16	42	26	44	68	48	25	33	17	38	18	15	40	52	28	25	16	21	6	35	40	38	69	26	12	26	2	16	21	0	32	56	43	42	92	48	17
CH67	A1.14	002_750ug CBD	54	52	14	17	45	42	28	14	7	14	39	12	40	61	44	57	20	46	16	24	20	10	24	29	37	3	4	18	38	50	34	44	29	14	72	56	33	30	32	16	19	32	11	6	3	22	37
CH70	B1.10	001_500ug CBD	44	16	21	23	35	47	57	11	11	18	6	13	7	16	16	4	22	2	5	1	5	9	3	7	0	0	14	0	4	0	0	1	0	0	0	0	0	19	68	0	0	0	0	0	0	0	0
CH71	B1.11	001_500ug CBD	67	19	17	28	30	5	7	14	13	38	67	27	31	52	30	47	34	45	51	30	41	28	47	50	39	13	8	34	26	49	9	36	22	27	45	41	30	25	20	31	2	6	10	15	1	3	3
CH72	B1.12	001_500ug CBD	67	30	28	5	22	20	0	6	13	23	6	35	43	24	8	15	6	36	10	44	20	5	16	35	21	10	31	29	8	12	7	3	12	14	2	15	13	24	14	4	0	0	0	5	0	12	2
CH73	B1.13	001_500ug CBD	108	90	72	21	17	26	63	59	35	46	88	31	83	61	50	37	39	43	75	69	32	50	51	40	116	114	50	37	41	60	33	40	37	44	56	47	160	139	10	52	49	34	21	22	21	50	60
CH76	C1.11	000_Emulstion Control tR	97	50	39	43	42	61	32	42	40	53	63	38	57	36	55	65	32	62	52	38	20	32	40	19	5	17	6	6	5	18	15	2	5	5	5	1	2	0	2	0	0	0	6	6	3	12	12
CH77	C1.12	000_Emulstion Control tR	76	49	34	26	76	51	38	68	29	41	66	56	58	57	48	59	54	67	46	19	44	52	44	35	21	14	12	25	26	0	9	3	0	8	0	0	0	0	0	0	0	0	5	4	5	10	16
CH78	C1.13	000_Emulstion Control tR	51	55	47	85	86	73	78	77	81	63	69	90	58	84	47	52	57	34	43	36	67	45	41	29	32	30	22	14	17	10	4	4	9	1	0	6	1	0	5	0	4	1	4	3	1	23	22
CH79	C1.14	000_Emulstion Control tR	21	12	48	68	62	66	55	52	55	63	48	38	57	30	47	40	26	31	32	31	21	40	26	44	31	32	14	41	28	41	46	40	75	47	55	70	63	56	45	34	33	56	26	24	44	55	86
CH81	A1.15	002_750ug CBD	31	37	4	53	25	10	9	13	10	8	0	1	0	0	0	0	0	2	0	0	0	0	0	0	0	0	0	0	0	0	0	0	0	0	0	0	0	7	0	0	0	0	0	0	0	0	0
CH82	A1.16	002_750ug CBD	12	4	0	4	3	5	1	0	5	9	0	7	2	10	0	6	20	4	6	9	1	9	12	13	4	29	16	28	13	8	19	22	21	7	8	20	24	38	15	33	30	34	38	40	27	40	49
CH87	B1.14	001_500ug CBD	54	25	7	42	41	27	29	56	32	32	85	62	55	46	53	76	109	115	80	73	125	85	55	22	73	62	67	57	103	29	47	103	44	63	74	126	47	33	14	76	24	30	71	79	172	192	176
CH88	B1.15	001_500ug CBD	25	5	5	7	4	12	6	4	4	9	10	13	17	21	25	16	39	15	9	21	33	16	24	25	28	30	17	27	30	23	39	50	45	75	96	112	100	95	66	68	50	90	132	135	148	118	130
CH93	C1.15	000_Emulstion Control tR	82	54	62	72	63	62	76	77	68	60	51	52	61	96	63	77	56	56	40	42	40	54	46	39	50	34	38	41	52	13	36	21	37	19	6	16	0	7	0	0	0	9	9	9	20	31	56
CH94	C1.16	000_Emulstion Control tR	7	2	8	9	12	13	7	20	6	13	14	12	10	14	7	5	15	9	4	6	6	5	13	3	12	10	6	11	4	2	7	3	5	30	72	56	46	34	20	10	10	9	9	5	5	8	12
CH113	A2.0	003_1000ug CBD	33	7	0	0	2	0	0	0	0	1	0	0	0	0	0	0	0	0	0	0	0	0	0	0	0	0	0	0	0	0	0	0	0	0	0	0	0	0	0	0	0	0	0	0	0	0	0
CH114	A2.1	003_1000ug CBD	48	12	10	40	19	17	0	6	34	16	10	10	69	28	6	0	91	65	31	5	8	2	14	24	15	35	65	61	62	1	13	37	6	2	10	186	11	0	0	19	18	0	0	14	2	4	8
CH115	A2.2	003_1000ug CBD	44	11	9	8	25	10	9	0	13	36	5	14	26	26	42	14	26	37	18	4	31	22	20	0	8	6	9	0	6	27	43	29	24	4	1	0	10	10	18	0	0	0	10	4	1	2	0
CH118	B2.0	002_750ug CBD	17	0	0	0	0	0	0	0	0	1	0	0	0	0	0	0	0	0	0	0	0	0	0	0	0	0	0	0	0	0	0	0	0	0	0	0	0	0	0	0	0	0	0	0	0	0	0
CH119	B2.1	002_750ug CBD	51	25	40	31	32	45	18	31	10	8	21	17	20	2	24	42	9	23	36	37	6	43	75	45	30	38	10	33	48	60	0	23	33	11	40	11	37	9	0	4	8	61	46	0	31	2	0
CH120	B2.2	002_750ug CBD	45	3	7	11	11	17	21	1	1	8	16	3	3	0	23	16	5	7	12	32	12	15	6	38	27	32	0	4	21	77	34	0	0	3	0	2	0	0	0	4	13	9	0	0	0	2	16
CH121	B2.3	002_750ug CBD	11	4	1	2	2	7	10	1	5	6	0	1	0	2	2	0	5	0	8	6	2	4	5	2	4	5	3	3	8	5	4	1	5	3	5	12	35	1	13	9	0	0	2	9	0	0	0
CH124	C2.0	001_500ug CBD	32	14	5	0	1	0	0	0	0	1	0	0	0	0	0	0	0	0	0	0	0	0	0	4	0	0	0	0	0	0	0	0	0	0	0	0	0	0	0	0	0	0	0	0	0	0	0
CH125	C2.1	001_500ug CBD	63	18	11	17	39	11	4	0	15	11	19	6	7	19	24	18	15	23	12	55	13	42	12	17	12	42	31	9	28	4	25	7	4	1	37	52	31	23	47	74	45	68	4	0	0	8	1
CH126	C2.2	001_500ug CBD	41	9	3	10	1	6	14	5	19	16	10	21	14	13	0	3	1	14	21	11	12	8	13	29	20	5	8	8	5	4	13	11	2	22	17	15	9	16	8	16	0	0	0	0	2	1	21
CH128	A2.3	003_1000ug CBD	36	18	19	29	26	28	20	12	14	33	12	30	18	0	7	15	9	2	11	3	5	0	6	1	0	3	1	0	0	7	3	21	17	0	0	2	4	1	3	3	3	15	7	18	12	16	19
CH129	A2.4	003_1000ug CBD	19	6	6	20	22	12	5	24	20	19	5	0	3	9	6	0	7	2	0	2	5	0	5	3	0	1	0	9	17	31	12	15	2	0	0	0	0	3	14	3	0	1	0	0	0	0	0
CH130	A2.5	003_1000ug CBD	38	55	28	27	23	71	28	14	5	39	2	5	0	0	2	4	0	17	34	17	17	26	31	39	31	31	3	21	50	27	110	54	53	53	3	16	24	14	22	50	59	21	4	34	68	44	47
CH131	A2.6	003_1000ug CBD	54	15	11	17	6	8	11	9	12	13	5	10	18	11	8	24	28	55	7	2	6	2	0	1	5	10	17	5	5	3	0	22	11	1	1	7	7	0	0	24	6	16	10	2	4	0	0
CH132	A2.7	003_1000ug CBD	0	0	0	0	0	0	0	0	0	0	0	0	0	0	0	0	0	0	0	0	0	0	0	0	0	0	0	0	0	0	0	0	0	0	0	0	0	0	0	0	0	0	0	0	0	0	0
CH134	B2.4	002_750ug CBD	50	28	6	31	28	57	30	10	15	30	15	3	6	34	56	44	45	25	8	34	42	25	79	69	28	63	101	77	14	59	22	35	77	101	107	50	52	10	55	63	10	4	3	12	32	18	0
CH135	B2.5	002_750ug CBD	45	23	10	5	9	13	11	0	29	20	5	10	11	10	4	39	7	40	23	34	14	20	33	21	16	26	1	8	0	6	6	4	5	8	25	9	13	22	33	74	44	36	60	10	0	1	6
CH136	B2.6	002_750ug CBD	67	7	18	6	16	10	15	19	5	12	9	0	2	12	4	5	20	23	34	28	32	1	32	53	10	6	3	0	0	3	6	14	13	4	0	0	8	1	2	5	10	12	2	3	0	0	0
CH137	B2.7	002_750ug CBD	67	41	41	30	39	41	23	23	16	34	32	15	20	36	7	9	30	26	50	21	18	18	4	20	4	8	9	2	8	13	2	10	1	24	9	1	8	11	0	10	7	5	1	0	3	3	12
CH139	C2.3	001_500ug CBD	66	32	24	54	66	60	58	77	47	32	61	62	52	94	92	73	57	68	65	100	36	75	54	31	64	60	85	26	24	15	28	57	31	18	14	22	13	7	0	0	0	3	4	0	3	10	1
CH140	C2.4	001_500ug CBD	75	27	24	9	22	38	35	36	2	11	26	9	46	33	52	26	51	36	71	53	49	39	48	52	4	58	44	21	35	32	53	39	21	25	33	46	40	43	44	24	3	2	17	17	12	21	26
CH141	C2.5	001_500ug CBD	57	22	7	3	14	12	14	2	3	20	19	17	18	14	21	13	40	16	20	25	13	12	4	13	8	17	14	25	28	16	6	6	18	22	18	9	8	8	9	0	0	3	0	0	0	0	2
CH142	C2.6	001_500ug CBD	53	46	43	28	23	14	11	13	13	34	9	20	36	33	43	26	11	20	3	56	24	35	22	25	0	31	29	23	46	22	14	8	9	3	9	13	2	7	0	3	7	2	0	0	0	4	4
CH143	C2.7	001_500ug CBD	23	21	6	12	5	15	4	7	15	16	4	14	21	24	29	13	8	21	16	24	36	27	21	9	15	12	2	9	12	12	35	7	14	33	85	43	8	27	28	0	33	7	2	3	3	4	7
CH144	A2.8	003_1000ug CBD	20	14	8	6	35	9	10	6	9	14	8	17	7	19	21	24	11	8	10	15	37	35	10	15	19	11	15	1	6	9	6	6	9	2	0	3	2	6	1	1	1	11	0	6	0	0	0
CH145	A2.9	003_1000ug CBD	23	13	3	14	20	5	4	3	1	6	15	13	0	24	19	15	6	23	21	28	15	12	6	8	0	0	0	20	0	0	0	0	0	5	0	1	5	0	9	0	2	0	0	0	0	15	0
CH146	A2.10	003_1000ug CBD	55	26	23	13	21	10	12	8	4	21	4	1	2	13	6	6	29	31	11	27	2	20	4	8	7	0	1	8	15	13	16	9	4	17	7	4	9	2	9	19	2	2	2	2	14	4	0
CH147	A2.11	003_1000ug CBD	65	13	8	25	15	21	9	12	22	35	8	20	22	5	10	75	60	35	34	28	8	14	18	7	21	6	16	28	44	45	80	31	9	8	23	30	26	39	55	28	36	4	4	5	24	12	30
CH148	A2.12	003_1000ug CBD	0	0	0	0	0	0	0	0	0	0	0	0	0	0	0	0	0	0	0	0	0	0	0	0	0	0	0	0	0	0	0	0	0	0	0	0	0	0	0	0	0	0	0	0	0	0	0
CH150	B2.8	002_750ug CBD	74	10	37	25	45	23	17	42	32	17	12	19	19	29	76	50	62	93	100	66	82	87	99	54	41	34	30	9	76	25	49	69	82	52	80	70	90	106	29	21	19	24	35	0	11	25	10
CH151	B2.9	002_750ug CBD	43	5	7	16	26	38	12	25	13	17	14	12	9	24	20	19	16	22	27	13	8	41	20	7	16	1	22	27	21	34	22	13	9	17	9	16	12	10	48	9	32	1	0	0	4	2	16
CH152	B2.10	002_750ug CBD	75	13	13	14	36	43	16	5	15	20	6	23	21	31	28	17	40	38	30	31	15	15	20	21	10	44	10	21	18	38	33	21	36	4	11	3	0	16	19	14	13	51	44	37	5	0	10
CH153	B2.11	002_750ug CBD	71	18	20	28	14	17	24	19	16	21	6	16	18	58	39	38	35	14	38	7	14	7	3	19	1	9	1	5	44	41	34	41	25	32	39	7	2	28	21	0	2	15	0	4	5	0	6
CH155	C2.8	001_500ug CBD	102	48	43	62	62	98	90	79	88	91	76	50	89	77	90	87	105	92	94	115	82	87	97	143	213	161	75	53	72	117	85	69	81	74	117	101	82	97	59	30	75	121	39	7	0	3	0
CH156	C2.9	001_500ug CBD	77	20	6	19	20	24	15	12	31	9	7	15	15	30	8	26	46	24	34	46	16	32	26	19	40	43	30	39	33	42	6	17	26	23	15	8	21	69	16	12	14	4	0	0	0	2	22
CH157	C2.10	001_500ug CBD	58	20	4	13	39	24	20	24	10	29	28	55	46	74	28	55	22	24	51	17	47	56	37	28	18	16	31	32	73	6	36	7	25	33	5	12	4	14	11	5	0	4	0	0	25	2	8
CH158	C2.11	001_500ug CBD	50	13	18	8	18	14	6	13	22	34	30	12	28	21	21	60	36	27	24	30	30	20	36	50	23	14	39	17	20	38	14	10	42	55	6	8	15	9	6	2	7	5	2	0	4	4	1
CH159	C2.12	001_500ug CBD	42	22	26	5	27	11	30	19	20	37	22	23	56	38	21	15	51	31	38	33	55	22	26	21	48	35	24	26	18	47	34	24	64	34	62	72	20	59	19	12	4	6	1	2	5	3	11
CH160	A2.13	003_1000ug CBD	36	42	13	12	20	19	8	13	30	29	15	10	53	39	44	61	68	49	59	34	64	69	54	51	48	65	50	14	77	91	65	67	93	66	70	55	28	90	80	82	7	53	48	11	5	1	8
CH161	A2.14	003_1000ug CBD	30	7	7	25	11	18	18	4	12	21	0	0	0	2	39	29	16	11	37	10	20	26	31	27	3	4	29	6	27	15	1	20	15	30	5	13	10	3	24	7	25	33	4	46	18	7	33
CH162	A2.15	003_1000ug CBD	42	15	16	13	8	33	7	0	12	28	32	20	9	8	38	34	28	9	21	15	28	28	10	7	18	14	9	2	0	7	4	44	12	20	4	4	15	27	12	27	26	43	31	4	10	3	0
CH163	A2.16	003_1000ug CBD	57	16	4	8	23	35	25	6	15	37	8	13	19	32	40	15	37	16	20	6	28	7	12	19	2	13	20	96	70	14	12	15	22	32	27	16	55	49	141	113	56	75	65	38	44	23	8
CH166	B2.12	002_750ug CBD	30	11	18	7	9	20	50	82	85	97	63	46	65	27	40	64	20	39	73	119	107	93	71	119	35	26	58	38	44	88	83	100	66	125	139	161	91	55	33	39	70	70	72	30	99	108	146
CH167	B2.13	002_750ug CBD	71	26	28	19	15	29	21	13	36	57	24	5	54	38	26	23	35	43	48	61	53	12	23	52	5	19	47	69	32	14	30	55	29	30	35	76	36	35	46	39	40	4	86	19	10	2	2
CH168	B2.14	002_750ug CBD	64	22	12	16	20	7	15	1	20	20	9	8	13	4	9	7	10	22	19	22	26	10	8	28	27	3	6	6	14	5	4	31	34	23	7	14	47	10	1	2	6	18	0	1	0	2	1
CH169	B2.15	002_750ug CBD	23	4	5	6	17	3	8	5	6	8	4	12	9	17	24	11	10	6	15	17	18	26	2	10	9	7	9	19	45	26	16	39	38	35	23	35	36	32	44	61	98	90	67	54	43	82	16
CH172	C2.13	001_500ug CBD	83	42	32	54	49	32	46	39	38	69	50	84	41	33	65	59	52	56	62	61	64	50	104	84	62	64	64	73	16	92	36	88	57	95	67	39	61	36	14	16	35	37	64	34	27	22	37
CH173	C2.14	001_500ug CBD	74	9	18	54	21	32	5	7	2	41	55	19	35	65	25	26	30	27	26	35	17	19	58	7	36	18	28	47	62	54	24	38	26	7	34	48	25	25	35	18	0	18	4	18	44	0	0
CH174	C2.15	001_500ug CBD	32	16	4	6	13	22	11	7	18	32	15	23	16	23	23	18	13	55	13	20	11	14	31	20	29	10	5	3	7	17	22	12	4	7	38	16	17	8	6	3	2	2	5	2	1	4	2
CH175	C2.16	001_500ug CBD	11	0	0	3	0	4	2	5	3	7	2	4	5	4	17	8	16	4	6	5	8	5	5	10	6	18	5	6	6	3	6	17	18	15	5	5	9	15	17	20	38	31	29	24	31	34	82
CH208	A3.0	000_Emulstion Control tR	25	9	6	34	33	11	44	40	55	49	38	46	50	57	37	56	43	52	59	33	54	64	47	61	107	82	101	114	146	21	7	20	12	2	8	0	1	1	2	3	7	1	0	5	6	6	6
CH209	A3.1	000_Emulstion Control tR	33	24	29	62	43	71	45	46	51	41	39	63	69	70	58	84	63	57	48	85	60	46	36	27	29	10	11	21	32	11	2	2	12	2	3	0	0	0	0	0	6	7	18	18	22	13	11
CH210	A3.2	000_Emulstion Control tR	43	26	32	27	31	64	43	66	50	53	50	53	42	73	58	56	74	77	70	48	44	34	17	36	20	16	9	10	9	7	0	8	9	9	0	0	0	0	1	0	0	0	1	1	2	5	12
CH211	A3.3	000_Emulstion Control tR	56	58	48	68	59	78	74	67	68	70	71	73	78	81	59	86	64	56	71	78	74	77	38	102	64	91	16	18	22	11	19	26	5	31	76	81	43	23	38	47	27	31	40	75	17	91	46
CH214	B3.0	003_1000ug CBD	50	22	10	17	35	57	16	58	43	27	69	10	11	9	18	1	18	17	59	47	81	22	49	108	71	27	23	21	17	36	0	36	25	16	34	12	25	0	0	6	11	0	8	4	31	0	0
CH215	B3.1	003_1000ug CBD	58	12	2	10	10	12	24	28	13	14	13	8	17	42	16	41	14	36	47	28	10	6	15	0	47	30	1	10	11	22	14	0	0	12	0	2	17	10	6	12	21	8	13	5	7	0	12
CH216	B3.2	003_1000ug CBD	79	16	4	25	23	18	17	12	27	10	2	6	8	22	8	10	32	43	13	7	11	13	4	4	3	1	9	20	19	19	15	11	6	1	2	1	0	0	22	8	2	9	6	0	0	0	0
CH217	B3.3	003_1000ug CBD	46	10	12	15	7	12	5	5	20	16	4	6	7	24	35	27	7	6	5	11	9	3	3	6	20	46	4	0	0	0	2	10	10	1	34	26	18	0	0	0	11	34	33	34	94	66	48
CH220	C3.0	002_750ug CBD	85	29	11	69	62	17	9	5	16	11	44	41	21	9	12	0	10	25	27	36	0	13	20	9	9	13	35	78	74	70	64	73	22	21	52	0	22	5	2	5	14	0	7	32	4	4	0
CH221	C3.1	002_750ug CBD	60	18	7	16	15	18	13	2	4	24	13	32	6	28	67	29	24	9	30	32	12	7	19	5	4	9	49	29	0	5	0	10	3	46	2	40	41	9	2	14	0	22	3	14	0	0	39
CH222	C3.2	002_750ug CBD	43	20	1	3	47	33	14	8	49	25	16	26	20	90	16	2	60	17	2	4	27	11	14	4	28	11	53	17	18	5	0	3	9	4	0	38	47	32	8	9	2	16	0	3	0	1	0
CH223	C3.3	002_750ug CBD	16	27	9	22	31	4	1	60	50	20	1	0	15	28	52	28	15	19	26	25	24	12	4	33	12	42	35	6	0	2	0	1	6	5	54	19	48	18	44	0	0	17	65	0	0	0	0
CH224	A3.4	000_Emulstion Control tR	9	34	39	47	43	44	51	56	42	46	44	71	73	37	52	57	72	52	32	16	18	18	22	11	5	3	2	8	0	6	4	20	8	9	0	0	0	0	0	1	2	1	0	9	3	8	6
CH225	A3.5	000_Emulstion Control tR	63	41	52	58	77	36	68	64	81	67	80	77	91	90	94	103	85	93	54	66	46	33	27	30	30	14	17	9	3	16	0	5	0	3	0	0	3	0	0	0	11	0	11	6	5	15	4
CH226	A3.6	000_Emulstion Control tR	63	57	55	35	45	61	69	88	75	81	93	71	88	101	131	99	87	90	95	55	46	36	52	30	27	26	38	31	36	24	34	7	5	0	0	2	0	0	4	1	1	17	7	29	15	16	21
CH227	A3.7	000_Emulstion Control tR	52	41	61	51	67	46	42	56	66	44	54	53	61	39	43	49	60	42	41	50	52	36	25	13	20	26	19	11	6	4	6	20	6	0	2	3	0	0	4	4	2	2	15	11	32	33	44
CH228	A3.8	000_Emulstion Control tR	3	0	0	2	2	0	1	1	0	3	1	0	0	2	0	0	0	1	0	0	1	0	0	0	0	0	0	0	0	1	1	0	0	0	0	0	0	0	0	0	1	0	0	1	0	0	0
CH230	B3.4	003_1000ug CBD	80	35	2	12	38	56	108	72	23	14	12	10	13	46	47	47	46	63	17	22	17	3	7	29	44	14	6	19	7	55	65	48	70	40	140	94	100	17	6	15	97	84	124	9	4	55	0
CH231	B3.5	003_1000ug CBD	78	18	6	6	19	9	6	12	22	18	15	13	16	0	0	2	36	16	21	19	5	13	42	15	6	11	26	6	16	16	21	7	20	19	22	13	9	1	18	29	22	10	6	27	0	22	63
CH232	B3.6	003_1000ug CBD	83	28	23	24	27	44	8	7	37	13	3	3	12	3	28	3	10	7	29	33	72	30	19	2	2	0	56	22	7	15	49	19	42	10	35	41	24	29	11	0	11	25	1	0	23	22	3
CH233	B3.7	003_1000ug CBD	75	8	0	16	12	16	8	9	16	18	1	11	19	47	2	9	12	28	36	8	23	6	25	27	28	7	0	4	18	31	27	9	18	2	0	13	15	1	48	40	15	43	20	1	7	2	35
CH235	C3.4	002_750ug CBD	80	84	23	55	61	44	73	81	49	25	34	68	100	56	92	70	95	100	68	93	79	104	88	68	99	107	105	94	19	74	58	11	9	2	2	21	7	0	4	0	25	3	0	3	0	0	4
CH236	C3.5	002_750ug CBD	71	42	26	31	33	24	41	35	44	19	9	27	28	35	34	30	22	30	16	16	59	26	46	22	6	25	31	19	41	26	24	6	19	26	27	6	0	9	9	33	11	16	17	37	68	118	73
CH237	C3.6	002_750ug CBD	55	18	20	12	11	22	15	5	19	31	42	4	9	1	27	41	30	7	18	24	10	23	9	29	4	22	9	37	30	21	23	16	0	8	23	4	15	0	0	15	24	3	0	6	10	0	1
CH238	C3.7	002_750ug CBD	39	11	7	9	19	9	6	6	5	23	28	13	0	6	6	2	26	21	51	21	22	5	21	0	18	2	2	0	1	5	0	53	23	4	6	4	0	14	15	24	0	10	19	12	2	0	0
CH239	C3.8	002_750ug CBD	39	4	1	13	8	2	17	10	11	12	0	1	8	5	16	5	3	24	28	4	19	3	5	8	16	0	0	0	6	6	16	33	15	67	39	6	0	1	3	6	0	7	13	11	0	0	0
CH240	A3.9	000_Emulstion Control tR	25	33	44	51	56	84	72	52	61	73	69	77	68	51	60	78	63	58	54	54	84	69	48	50	74	49	121	86	25	7	8	2	2	1	5	5	75	2	1	5	0	2	13	1	4	6	9
CH241	A3.10	000_Emulstion Control tR	38	22	25	26	37	31	49	68	50	73	58	55	88	79	64	83	75	82	69	73	43	62	42	9	11	12	9	7	65	49	22	15	23	8	3	0	0	0	3	2	3	10	16	5	15	18	13
CH242	A3.11	000_Emulstion Control tR	34	18	20	26	43	39	52	62	51	48	55	62	56	57	67	74	54	80	61	46	87	70	68	82	14	38	18	18	42	27	19	15	19	15	16	29	4	1	3	1	1	11	4	12	13	19	32
CH243	A3.12	000_Emulstion Control tR	53	55	52	73	68	64	60	57	86	60	54	62	88	77	50	63	65	65	48	40	57	50	54	33	39	34	38	28	16	27	90	58	31	21	6	0	4	4	0	5	21	14	11	63	85	112	102
CH244	A3.13	000_Emulstion Control tR	0	0	0	0	0	0	0	0	0	2	0	0	0	0	0	0	0	0	0	0	0	0	0	0	0	0	0	0	0	0	0	0	0	0	0	0	0	0	0	0	0	0	0	0	1	1	0
CH246	B3.8	003_1000ug CBD	39	25	15	29	19	38	24	32	50	57	6	9	12	5	16	41	7	16	54	55	29	52	69	16	14	74	95	58	27	0	12	57	10	28	26	44	12	38	48	9	126	116	117	73	21	24	31
CH247	B3.9	003_1000ug CBD	49	20	18	25	15	11	17	4	28	35	12	32	14	47	12	63	26	47	19	2	25	2	17	13	20	38	43	44	0	0	1	36	30	9	19	0	0	0	31	31	2	19	55	16	25	2	0
CH248	B3.10	003_1000ug CBD	43	23	6	3	9	14	1	1	23	13	3	1	15	2	2	4	13	27	23	18	13	9	9	17	7	32	3	28	20	11	13	15	25	7	16	5	8	15	2	26	27	9	22	12	2	2	2
CH249	B3.11	003_1000ug CBD	50	17	2	1	5	28	14	5	11	25	20	18	10	39	43	38	47	16	36	21	14	53	40	65	67	41	40	4	19	12	9	27	43	33	27	18	34	32	35	16	55	13	50	18	10	36	18
CH251	C3.9	002_750ug CBD	73	35	11	40	45	62	35	32	65	129	77	85	79	36	44	48	75	66	49	46	120	89	80	62	102	62	105	86	49	48	3	34	70	47	19	119	47	34	0	0	0	4	0	66	56	0	44
CH252	C3.10	002_750ug CBD	72	29	11	20	26	26	12	25	18	29	12	11	5	18	24	72	23	15	23	20	12	37	26	14	19	14	29	23	35	20	0	16	18	51	40	24	54	69	41	57	49	67	24	74	61	21	78
CH253	C3.11	002_750ug CBD	42	9	5	5	2	2	6	0	6	9	0	10	1	6	4	20	9	13	13	16	4	8	6	28	4	3	12	4	13	32	27	1	3	10	6	1	2	9	20	7	0	7	0	0	0	0	11
CH254	C3.12	002_750ug CBD	28	3	11	7	19	3	4	3	5	5	2	10	3	2	15	16	20	10	17	12	30	50	31	6	2	5	13	4	24	9	7	38	0	0	15	9	1	3	24	13	0	1	6	12	0	3	26
CH255	C3.13	002_750ug CBD	19	34	5	12	15	23	5	5	14	18	10	42	12	15	21	29	32	20	15	20	18	7	32	5	35	14	21	50	62	27	8	50	10	11	25	18	14	4	19	106	26	24	25	12	8	75	14
CH257	A3.14	000_Emulstion Control tR	33	37	47	63	47	54	43	54	62	74	63	59	56	58	65	50	59	50	53	33	37	31	12	17	34	14	6	13	13	36	6	9	40	36	37	5	10	5	11	51	37	7	6	15	24	15	24
CH258	A3.15	000_Emulstion Control tR	53	38	32	30	75	64	74	78	99	60	63	87	70	73	58	51	77	79	76	71	49	43	31	33	23	17	14	13	15	12	6	5	4	4	8	1	1	2	1	0	2	46	27	17	28	41	48
CH259	A3.16	000_Emulstion Control tR	20	21	56	71	78	95	108	86	104	94	73	109	82	69	94	73	94	78	66	89	78	67	65	90	122	129	110	115	69	113	158	143	113	128	168	178	207	154	70	77	116	42	68	92	147	139	131
CH262	B3.12	003_1000ug CBD	39	44	49	12	33	60	13	22	52	89	16	32	13	34	18	40	42	41	60	17	18	10	27	15	48	64	30	37	73	89	79	81	3	10	3	57	26	48	35	37	39	7	5	6	32	6	14
CH263	B3.13	003_1000ug CBD	33	23	17	10	19	58	23	17	15	14	9	14	0	22	18	15	23	8	38	19	21	24	15	8	11	13	21	25	22	13	9	10	30	24	26	15	41	27	69	47	24	51	70	39	35	38	36
CH264	B3.14	003_1000ug CBD	39	6	9	8	8	12	23	33	14	15	10	13	27	20	1	8	7	12	21	44	16	3	27	13	22	6	3	0	36	21	30	40	56	44	4	2	41	58	33	15	37	54	17	1	2	1	2
CH265	B3.15	003_1000ug CBD	7	2	1	1	0	2	0	1	0	6	1	0	1	0	2	0	1	2	2	6	4	0	1	7	1	7	8	7	11	5	1	7	1	7	6	15	24	7	17	10	11	30	19	9	24	7	21
CH268	C3.14	002_750ug CBD	34	32	82	57	72	61	49	26	138	80	81	63	105	52	55	63	47	43	63	85	71	20	95	82	59	74	113	127	175	196	153	184	131	187	122	57	109	137	163	206	137	155	119	107	61	76	33
CH269	C3.15	002_750ug CBD	33	15	3	3	33	1	17	22	3	10	30	8	47	12	43	55	5	13	34	61	37	50	11	6	35	74	64	61	37	29	72	92	48	6	25	22	4	38	29	5	3	42	16	54	43	45	67
CH270	C3.16	002_750ug CBD	70	25	11	2	17	25	35	38	41	25	11	12	18	17	20	39	58	51	34	85	35	30	30	29	81	22	67	23	18	25	40	2	22	12	21	52	34	65	56	80	53	82	85	54	37	18	13
CH289	A4.0	001_500ug CBD	10	2	3	6	7	9	2	6	10	10	8	14	15	7	16	18	6	10	6	13	9	26	10	27	17	21	23	8	27	34	21	9	10	1	5	12	23	8	7	0	5	2	3	1	0	5	2
CH290	A4.1	001_500ug CBD	45	51	75	25	71	38	36	19	63	85	56	57	89	34	41	27	48	42	26	83	102	41	34	53	28	29	47	49	28	77	155	138	72	37	67	87	36	55	71	15	0	0	2	3	8	4	10
CH295	B4.0	000_Emulstion Control tR	86	65	87	77	53	51	53	77	60	46	61	81	67	80	70	77	57	69	38	63	65	80	38	55	51	61	50	68	19	36	14	47	9	3	2	7	40	96	7	8	14	2	7	6	25	7	16
CH296	B4.1	000_Emulstion Control tR	122	126	97	65	61	76	75	72	57	87	51	49	54	84	45	50	70	53	63	33	35	53	47	39	28	23	34	73	25	17	7	14	25	4	10	5	0	0	0	0	3	6	5	10	30	3	19
CH301	C4.0	003_1000ug CBD	33	13	8	11	27	5	17	7	18	5	7	5	6	21	1	2	3	2	1	15	1	2	4	12	16	22	18	9	13	14	32	3	19	32	0	15	4	0	10	7	4	0	31	9	19	108	44
CH302	C4.1	003_1000ug CBD	8	0	2	0	1	2	0	4	4	4	1	1	0	1	3	4	0	0	8	1	1	2	0	2	0	0	6	5	0	0	0	0	1	1	0	0	1	2	0	0	8	6	6	0	0	0	0
CH304	A4.2	001_500ug CBD	52	45	26	54	85	62	39	40	53	62	69	49	63	60	66	77	49	75	51	33	89	32	12	35	34	20	51	74	13	10	11	10	59	6	45	27	9	3	7	23	26	143	71	112	90	67	17
CH305	A4.3	001_500ug CBD	37	20	7	13	18	20	16	24	30	53	33	13	51	83	33	38	32	38	56	45	46	44	22	46	19	61	24	26	0	13	5	5	16	18	1	2	0	0	0	3	0	0	8	3	5	2	19
CH306	A4.4	001_500ug CBD	44	19	25	14	39	29	19	22	26	12	45	26	36	15	13	34	32	30	16	5	43	8	34	21	26	80	27	11	36	31	14	37	18	12	5	8	26	1	12	19	6	0	0	2	1	5	0
CH307	A4.5	001_500ug CBD	71	32	33	27	50	27	10	23	22	34	30	51	17	32	33	33	56	31	36	20	39	26	37	39	24	19	11	24	54	23	23	12	3	3	33	27	103	7	20	75	21	3	1	12	0	5	11
CH310	B4.2	000_Emulstion Control tR	42	47	33	33	29	40	44	37	59	58	56	59	71	63	70	68	90	61	37	55	32	46	29	57	42	19	64	119	140	58	70	3	1	0	13	44	23	0	0	0	2	0	2	11	3	2	18
CH311	B4.3	000_Emulstion Control tR	61	34	48	34	37	36	34	31	43	43	51	61	50	45	55	55	39	28	44	52	29	22	22	10	19	11	11	12	11	11	3	1	7	26	15	18	0	2	4	0	3	0	12	16	14	11	17
CH312	B4.4	000_Emulstion Control tR	108	106	95	61	68	69	96	61	72	66	75	70	95	119	79	90	61	57	49	60	44	34	39	30	37	47	15	21	52	19	5	4	12	0	9	3	0	6	12	13	5	8	20	116	112	143	163
CH313	B4.5	000_Emulstion Control tR	59	54	82	93	79	63	84	90	72	78	73	74	86	86	87	127	89	60	71	51	43	54	39	62	122	91	61	35	53	28	31	15	83	216	190	48	7	0	7	29	21	5	16	16	23	34	36
CH316	C4.2	003_1000ug CBD	93	23	3	15	31	25	48	21	30	31	21	6	39	4	22	41	36	53	37	22	27	34	15	14	51	51	17	12	18	23	41	41	48	0	4	25	19	31	4	5	0	21	10	7	6	0	7
CH317	C4.3	003_1000ug CBD	75	18	2	14	27	9	26	17	4	19	3	7	23	6	8	18	9	9	4	9	8	15	19	26	9	19	10	0	4	4	0	2	1	13	1	7	1	6	0	4	7	2	25	29	8	22	11
CH318	C4.4	003_1000ug CBD	51	7	1	1	10	14	6	17	18	14	10	2	15	0	5	5	16	13	7	27	13	8	1	11	7	2	1	6	2	0	12	4	9	1	3	28	16	0	2	18	12	7	10	9	0	2	14
CH319	C4.5	003_1000ug CBD	31	51	37	41	19	10	18	10	14	15	4	17	6	36	7	5	55	14	25	49	47	32	40	32	86	55	11	18	20	16	14	19	3	30	39	46	43	0	16	0	0	8	9	0	8	7	54
CH320	A4.6	001_500ug CBD	17	16	16	29	15	55	31	37	25	14	35	23	40	56	43	39	28	45	62	36	24	21	22	44	30	18	22	24	28	83	34	39	144	118	59	3	5	92	30	7	7	8	7	1	23	93	61
CH321	A4.7	001_500ug CBD	44	4	15	5	7	16	26	34	18	12	7	9	13	11	19	27	14	8	26	27	10	13	34	1	1	7	10	8	9	1	10	6	8	4	11	13	22	4	7	16	0	11	13	48	54	46	52
CH322	A4.8	001_500ug CBD	38	22	33	18	7	8	16	11	1	30	15	20	1	4	10	15	47	17	15	21	2	14	38	0	2	7	21	2	0	0	0	1	11	6	6	0	2	0	9	2	0	0	0	0	0	0	8
CH323	A4.9	001_500ug CBD	37	10	2	8	17	21	17	21	14	8	3	12	21	12	22	21	15	31	9	14	29	7	8	9	0	17	10	6	31	4	3	15	2	0	3	1	1	5	3	0	1	0	0	0	1	0	0
CH324	A4.10	001_500ug CBD	9	0	4	3	2	6	6	5	3	20	9	13	18	11	17	10	22	13	22	22	30	18	13	31	9	11	2	12	28	24	28	41	35	30	55	43	28	63	66	67	45	4	21	2	6	24	12
CH326	B4.6	000_Emulstion Control tR	56	53	32	45	48	40	48	41	40	46	69	75	70	53	68	80	47	60	56	43	40	73	20	18	10	25	26	40	30	25	22	19	51	71	17	46	58	22	0	3	7	0	15	10	13	5	6
CH327	B4.7	000_Emulstion Control tR	69	35	37	24	50	49	23	42	52	49	56	71	56	43	84	61	43	77	49	44	29	43	33	30	14	15	6	14	7	5	3	4	5	4	5	2	0	0	0	1	4	3	36	26	25	13	14
CH328	B4.8	000_Emulstion Control tR	81	30	51	52	61	69	92	92	82	75	67	100	85	89	74	50	70	60	72	47	51	33	30	45	6	12	21	49	23	35	34	13	6	5	14	4	1	1	1	1	6	2	28	8	9	15	11
CH329	B4.9	000_Emulstion Control tR	69	49	67	78	91	85	92	81	100	93	64	71	93	69	70	55	72	65	63	72	47	46	44	24	11	16	26	13	14	16	18	11	4	6	14	0	6	4	0	2	0	9	10	6	9	17	36
CH331	C4.6	003_1000ug CBD	47	50	36	23	49	10	18	60	43	41	33	27	44	64	22	60	34	81	109	98	119	153	124	100	72	117	53	134	131	150	113	148	97	96	154	86	90	53	122	108	112	58	14	1	7	40	159
CH332	C4.7	003_1000ug CBD	36	17	13	6	11	18	18	17	7	9	5	8	25	49	11	4	12	9	24	49	32	15	21	46	16	23	41	1	8	2	11	12	18	11	18	0	4	3	5	56	64	34	79	77	73	25	7
CH333	C4.8	003_1000ug CBD	60	18	6	5	10	14	6	11	8	10	9	0	0	0	6	0	3	3	31	1	17	3	9	2	2	2	5	8	13	15	14	40	6	25	0	3	1	8	17	46	23	41	47	92	62	44	27
CH334	C4.9	003_1000ug CBD	41	6	0	0	18	17	22	18	25	15	2	5	4	1	28	4	27	18	29	17	24	21	19	0	0	17	1	2	9	6	2	15	49	18	1	41	23	0	0	67	34	33	2	0	0	7	5
CH335	C4.10	003_1000ug CBD	28	15	3	3	9	35	25	21	19	46	21	12	36	25	14	12	7	4	40	24	31	20	4	23	32	18	6	18	14	8	2	2	1	4	5	16	4	15	23	1	6	8	7	25	22	58	7
CH336	A4.11	001_500ug CBD	20	16	19	26	6	7	16	5	13	32	15	20	44	33	68	31	43	33	43	93	34	33	19	99	107	49	66	79	53	58	37	47	62	36	64	43	49	38	26	3	2	3	8	11	29	12	13
CH337	A4.12	001_500ug CBD	27	14	11	10	8	6	3	8	14	10	2	9	16	18	15	22	12	15	24	22	24	25	4	23	35	11	17	10	8	2	37	34	45	46	11	11	7	28	34	4	12	9	6	2	0	2	2
CH338	A4.13	001_500ug CBD	35	24	17	11	28	14	16	1	4	28	5	5	11	17	16	16	28	8	36	26	21	21	37	12	15	19	9	8	27	26	13	16	1	9	19	29	31	27	1	0	0	0	4	3	0	3	3
CH339	A4.14	001_500ug CBD	41	41	6	8	5	28	22	11	75	27	8	34	16	24	32	28	10	46	47	57	80	25	22	16	6	18	9	7	10	23	10	54	60	29	9	23	23	78	12	8	0	7	0	2	2	22	0
CH342	B4.10	000_Emulstion Control tR	41	27	36	19	45	39	50	37	84	54	67	63	86	60	72	57	97	91	89	79	76	56	56	82	50	32	36	39	14	15	5	20	9	15	3	3	2	0	0	0	5	2	9	3	7	11	14
CH343	B4.11	000_Emulstion Control tR	46	19	23	36	15	33	39	52	56	58	65	77	68	51	74	76	76	61	69	44	43	46	37	15	31	34	16	27	14	5	4	11	14	5	2	7	7	0	1	4	8	1	14	12	15	11	7
CH344	B4.12	000_Emulstion Control tR	30	29	35	37	55	51	74	66	83	93	81	85	69	81	65	72	38	46	29	49	56	17	31	17	23	33	14	3	8	6	3	16	7	0	5	3	0	2	1	0	0	0	7	24	2	19	23
CH345	B4.13	000_Emulstion Control tR	46	53	33	65	80	81	73	83	84	69	64	63	50	47	72	74	49	70	43	68	28	49	45	43	60	40	22	22	35	7	15	10	6	38	15	6	11	7	1	0	0	2	13	38	81	97	125
CH348	C4.11	003_1000ug CBD	48	14	5	11	8	13	11	6	2	7	8	0	0	0	2	21	17	30	10	9	26	9	17	13	2	1	5	0	5	4	2	11	10	0	43	19	37	34	17	12	53	0	1	9	13	2	57
CH349	C4.12	003_1000ug CBD	55	33	13	5	6	16	4	0	4	7	4	19	1	11	0	4	6	0	19	3	3	12	27	14	9	24	32	23	43	40	39	0	0	3	5	21	0	0	6	12	1	8	5	13	0	23	11
CH350	C4.13	003_1000ug CBD	45	33	3	0	9	4	10	17	15	7	3	0	6	7	0	4	7	8	21	4	7	38	6	5	15	15	11	13	0	0	10	9	2	10	0	0	12	11	9	2	4	22	10	9	0	6	2
CH351	C4.14	003_1000ug CBD	10	3	4	1	4	9	8	4	21	4	0	0	11	8	5	0	11	52	11	10	8	7	15	10	11	10	18	11	3	4	20	12	8	8	8	4	21	19	28	20	18	9	58	2	13	67	43
CH353	A4.15	001_500ug CBD	26	16	5	11	6	8	20	22	18	14	23	51	10	11	31	31	18	20	52	23	38	27	25	17	22	20	33	58	5	22	21	23	21	5	48	49	13	24	15	4	6	0	1	0	1	6	20
CH354	A4.16	001_500ug CBD	41	18	9	6	17	13	18	14	31	16	30	15	11	17	26	14	21	22	23	21	6	11	75	31	42	71	48	7	11	37	53	21	34	17	4	4	6	1	0	0	4	1	1	0	8	4	9
CH359	B4.14	000_Emulstion Control tR	37	39	34	43	67	57	72	63	87	76	72	83	77	60	61	68	78	65	80	38	41	38	54	56	28	26	41	25	42	73	56	40	10	13	4	8	0	0	2	0	4	40	11	21	13	19	21
CH360	B4.15	000_Emulstion Control tR	27	36	28	32	57	60	60	82	82	74	95	68	51	79	70	69	55	51	62	45	35	42	64	49	52	53	31	39	25	14	10	5	8	6	8	9	0	4	0	0	11	13	7	19	46	34	39
CH365	C4.15	003_1000ug CBD	26	13	8	5	6	8	4	3	12	10	10	0	6	2	4	7	1	4	4	4	1	4	7	4	0	3	56	4	28	24	23	17	1	0	11	14	9	28	0	17	19	9	0	2	45	33	16
CH366	C4.16	003_1000ug CBD	8	1	0	0	1	2	0	3	2	5	0	0	3	3	0	2	0	14	7	9	3	11	3	3	4	2	4	19	13	3	33	29	10	25	16	7	0	20	4	10	1	8	17	24	32	64	103
[truncated: 99 more columns]

## Sheet: CBD ex4 tL
DATE:	2023-07-28 12:52:24
FILE:	C:\Software\WMicrotracker One\wmicrotracker_w8_v30api\wmicrotracker\wmicrotracker\p00025\20230725_1222
SUBPROJECT:	2023 0728 wDAT CBD 0-400ug EP4 ex4 tL
<<<<<< Group Activity: Average Activity Counts per Data Interval>>>>>>
Group/Time[m]	30	60	90	120	150	180	210	240	270	300	330	360	390	420	450	480	510	540	570	600	630	660	690	720	750	780	810	840	870	900	930	960	990	1020	1050	1080	1110	1140	1170	1200	1230	1260	1290	1320	1350	1380	1410	1440	1470
000_Emulsion control	45	52	49	51	51	57	67	71	80	82	79	83	81	80	82	77	72	66	55	51	50	50	46	47	46	41	33	32	34	35	32	32	31	26	22	16	18	16	13	15	15	18	27	34	37	35	45	49	48
001_Tween Control	57	57	56	61	72	74	79	83	88	93	91	89	88	81	77	72	66	60	58	50	50	41	35	32	37	27	24	23	17	20	26	20	21	16	19	15	13	12	14	15	20	24	29	33	33	38	41	42	43
002_300ug CBD	49	49	40	42	45	48	58	60	62	66	71	74	70	68	72	70	67	66	62	61	55	49	48	51	48	57	50	48	53	57	46	47	43	38	37	35	26	20	17	16	17	20	26	32	43	53	57	64	69
003_400ug CBD	40	41	28	34	38	38	44	44	47	52	55	51	57	56	61	58	56	52	57	51	52	48	44	47	40	38	46	42	39	36	39	41	35	33	28	23	23	25	16	14	18	16	22	33	42	45	51	53	61
<<<<<< Group Activity: Standard Error >>>>>>
Group/Time[m]	30	60	90	120	150	180	210	240	270	300	330	360	390	420	450	480	510	540	570	600	630	660	690	720	750	780	810	840	870	900	930	960	990	1020	1050	1080	1110	1140	1170	1200	1230	1260	1290	1320	1350	1380	1410	1440	1470
000_Emulsion control	1.2	1.7	1.7	3.5	2.9	4	4	3.5	0	2.3	3.5	1.2	3.5	2.3	3.5	3.5	4	2.9	2.9	2.3	3.5	4.6	3.5	1.7	4.6	6.9	5.8	4	4	7.5	6.4	5.2	5.2	5.2	2.3	3.5	1.2	5.2	3.5	4	4	5.2	5.2	5.2	5.2	2.3	3.5	2.9	2.9
001_Tween Control	4.6	5.2	3.5	4	4.6	4	4	4	2.9	5.2	2.9	1.7	3.5	4.6	2.9	2.3	5.8	4.6	4.6	4.6	4.6	6.4	8.1	5.2	5.2	4	1.7	2.9	1.2	4	6.9	3.5	5.2	6.4	6.9	5.2	4.6	2.9	2.3	5.8	4.6	5.8	6.4	7.5	6.4	6.9	7.5	5.8	4
002_300ug CBD	4	3.5	2.9	2.3	2.3	2.3	3.5	1.7	2.3	2.3	1.7	2.9	2.3	3.5	1.7	2.9	3.5	5.2	3.5	0.6	2.3	2.9	4	2.9	1.2	6.4	4	5.8	7.5	11.5	8.1	5.2	4.6	5.8	1.2	9.8	10.4	7.5	2.9	1.2	4	4.6	6.4	9.2	8.1	9.2	11	7.5	5.8
003_400ug CBD	2.9	4.6	4.6	4	3.5	2.3	4	4.6	4	5.8	6.9	4	3.5	2.9	5.8	5.8	4.6	5.2	4.6	4	3.5	1.7	1.7	4	4.6	4	2.9	3.5	4.6	5.2	1.7	2.9	4.6	1.2	1.2	1.7	2.9	3.5	1.7	3.5	2.9	5.8	5.2	8.7	11	8.7	8.7	7.5	9.8
<<<<<< Group Activity: Number of wells/group >>>>>>
Group/Time[m]	30	60	90	120	150	180	210	240	270	300	330	360	390	420	450	480	510	540	570	600	630	660	690	720	750	780	810	840	870	900	930	960	990	1020	1050	1080	1110	1140	1170	1200	1230	1260	1290	1320	1350	1380	1410	1440	1470
000_Emulsion control	3	3	3	3	3	3	3	3	3	3	3	3	3	3	3	3	3	3	3	3	3	3	3	3	3	3	3	3	3	3	3	3	3	3	3	3	3	3	3	3	3	3	3	3	3	3	3	3	3
001_Tween Control	3	3	3	3	3	3	3	3	3	3	3	3	3	3	3	3	3	3	3	3	3	3	3	3	3	3	3	3	3	3	3	3	3	3	3	3	3	3	3	3	3	3	3	3	3	3	3	3	3
002_300ug CBD	3	3	3	3	3	3	3	3	3	3	3	3	3	3	3	3	3	3	3	3	3	3	3	3	3	3	3	3	3	3	3	3	3	3	3	3	3	3	3	3	3	3	3	3	3	3	3	3	3
003_400ug CBD	3	3	3	3	3	3	3	3	3	3	3	3	3	3	3	3	3	3	3	3	3	3	3	3	3	3	3	3	3	3	3	3	3	3	3	3	3	3	3	3	3	3	3	3	3	3	3	3	3
<<<<<< Number of Samples per Acquisition Interval [1unit=500values] >>>>>>
Time[m]	30	60	90	120	150	180	210	240	270	300	330	360	390	420	450	480	510	540	570	600	630	660	690	720	750	780	810	840	870	900	930	960	990	1020	1050	1080	1110	1140	1170	1200	1230	1260	1290	1320	1350	1380	1410	1440	1470
#Samples	30	30	30	30	30	30	30	30	30	30	30	30	30	30	30	30	30	30	30	30	30	30	30	30	30	30	30	30	30	30	30	30	30	30	30	30	30	30	30	30	30	30	30	30	30	30	30	30	30
<<<<<< Average Temperature [°C] >>>>>>
Time[m]	30	60	90	120	150	180	210	240	270	300	330	360	390	420	450	480	510	540	570	600	630	660	690	720	750	780	810	840	870	900	930	960	990	1020	1050	1080	1110	1140	1170	1200	1230	1260	1290	1320	1350	1380	1410	1440	1470
Temp[°C]	22.6	22.8	22.8	22.8	22.8	22.6	22.8	22.8	22.8	22.8	22.8	22.8	22.8	22.8	22.8	22.8	22.8	22.8	22.8	22.8	22.8	22.8	22.8	22.8	22.6	22.8	22.8	22.8	22.8	22.6	22.6	22.8	22.8	22.6	22.6	22.8	22.8	22.6	22.6	22.6	22.8	22.6	22.8	22.8	22.8	22.6	22.8	22.8	22.8
<<<<<< Well Activity >>>>>>
Well	Group/Time[m]	30	60	90	120	150	180	210	240	270	300	330	360	390	420	450	480	510	540	570	600	630	660	690	720	750	780	810	840	870	900	930	960	990	1020	1050	1080	1110	1140	1170	1200	1230	1260	1290	1320	1350	1380	1410	1440
A1	001_Tween Control	65	64	62	69	79	79	87	91	93	94	94	89	88	80	78	74	68	69	61	58	60	52	51	42	47	33	25	26	19	26	35	20	14	7	5	7	5	7	10	13	25	35	42	48	45	50	55	53
B1	000_Emulsion control	45	54	49	51	46	57	67	69	80	78	76	82	87	84	88	78	70	67	56	50	45	42	41	49	54	51	45	35	42	49	42	41	41	36	26	23	20	16	15	17	20	27	33	36	41	38	48	49
C1	003_400ug CBD	34	31	20	27	35	37	39	37	44	48	45	45	50	56	60	53	49	54	60	49	50	45	43	45	33	32	42	40	36	31	42	42	31	36	30	21	17	20	17	10	13	6	12	16	20	27	33	38
A2	002_300ug CBD	47	50	36	39	42	51	65	56	61	63	72	69	66	67	68	65	60	56	56	61	52	46	40	48	46	45	42	39	47	41	36	44	36	30	35	17	6	9	12	14	21	24	34	40	57	64	67	79
B2	001_Tween Control	57	60	54	60	72	76	73	80	84	84	85	87	82	74	72	67	56	54	49	42	46	31	25	24	30	20	20	25	15	21	31	25	31	29	27	24	20	17	18	26	24	22	24	29	30	36	37	38
C2	000_Emulsion control	46	49	46	46	51	51	60	67	80	81	76	82	75	78	77	71	66	70	49	48	49	50	45	44	38	28	26	24	33	32	34	31	23	23	19	14	17	8	6	7	7	10	17	24	27	30	38	45
A3	003_400ug CBD	43	45	36	41	45	43	52	53	55	63	69	59	60	61	71	69	65	59	63	58	59	51	47	55	48	45	51	49	48	47	36	36	31	32	27	26	26	32	13	21	23	25	25	39	53	52	61	59
B3	002_300ug CBD	56	54	46	47	45	48	54	62	67	70	68	76	72	62	73	71	69	70	62	61	54	46	54	56	50	67	54	58	68	79	62	57	52	49	37	50	42	34	18	18	20	25	30	42	43	60	69	58
C3	001_Tween Control	50	47	51	55	64	66	77	78	88	102	93	92	94	89	82	74	75	58	64	51	45	40	30	29	33	29	26	17	16	13	13	14	17	13	24	14	14	11	13	7	10	16	21	23	24	27	30	34
A4	000_Emulsion control	43	54	52	57	55	64	73	78	80	86	86	86	81	77	82	83	79	61	59	56	56	58	53	47	45	44	29	38	28	23	21	23	30	20	21	12	18	25	18	20	18	18	30	42	44	37	48	54
B4	003_400ug CBD	43	46	27	35	33	35	40	41	41	45	51	50	61	52	52	52	55	42	48	45	48	48	41	42	40	38	46	38	33	31	38	46	44	32	27	21	26	23	19	12	18	18	30	44	53	55	58	61
C4	002_300ug CBD	43	43	39	41	49	44	54	62	59	64	73	78	73	74	74	74	72	72	67	60	59	55	49	48	48	60	53	47	44	52	39	39	41	35	39	38	30	17	21	17	9	11	13	13	30	35	35	55
<<<<<< Channel Activity >>>>>>
Channel	Well	Group/Time[m]	30	60	90	120	150	180	210	240	270	300	330	360	390	420	450	480	510	540	570	600	630	660	690	720	750	780	810	840	870	900	930	960	990	1020	1050	1080	1110	1140	1170	1200	1230	1260	1290	1320	1350	1380	1410
CH17	A1.0	001_Tween Control	56	84	25	0	0	0	1	0	0	0	0	0	0	0	0	0	0	72	57	61	42	45	39	39	23	23	14	14	5	13	0	3	1	0	0	0	1	5	10	0	5	3	21	16	7	27	19
CH18	A1.1	001_Tween Control	65	36	61	39	86	63	63	93	88	113	80	60	75	63	49	52	55	123	67	62	41	20	16	5	7	8	5	6	5	4	0	0	1	0	0	0	0	0	2	0	2	4	11	8	5	23	25
CH23	B1.0	000_Emulsion control	27	0	0	0	0	0	0	0	0	0	0	67	108	78	88	70	77	45	38	34	38	20	27	31	21	12	10	6	2	3	3	9	4	0	0	0	0	0	5	2	2	8	0	8	5	2	2
CH24	B1.1	000_Emulsion control	41	60	39	47	44	44	67	55	70	45	70	78	63	56	68	48	30	41	47	30	55	16	21	9	46	12	39	57	25	22	20	11	11	0	0	0	4	2	2	1	1	3	4	7	10	11	22
CH29	C1.0	003_400ug CBD	32	48	6	17	30	45	69	66	43	16	19	32	13	39	49	39	39	28	27	65	18	29	9	21	11	76	106	99	38	28	15	18	0	0	3	2	1	1	0	1	3	3	4	10	9	6	13
CH30	C1.1	003_400ug CBD	17	20	10	24	41	7	24	25	50	37	27	25	31	31	28	35	50	13	42	25	31	32	41	30	19	1	32	13	13	37	40	13	28	3	11	4	1	123	130	38	69	29	7	5	2	8	22
CH32	A1.2	001_Tween Control	42	51	41	29	51	66	61	81	88	75	65	73	62	62	48	47	43	24	37	21	16	9	16	20	0	11	6	33	20	2	2	1	0	0	2	0	5	2	0	3	0	1	1	4	3	11	3
CH33	A1.3	001_Tween Control	43	41	46	39	66	53	70	92	89	104	104	122	96	85	49	62	75	69	49	45	37	31	13	13	35	21	2	4	0	12	56	0	0	3	0	3	0	1	5	5	1	6	9	7	12	12	17
CH34	A1.4	001_Tween Control	55	64	56	82	72	64	78	82	114	102	103	99	81	82	83	73	47	34	45	27	25	24	13	23	16	6	7	5	2	1	1	0	0	0	0	0	6	2	0	2	1	16	6	19	6	18	23
CH35	A1.5	001_Tween Control	99	75	76	110	106	107	100	112	88	103	93	82	99	59	83	76	73	48	58	48	51	21	34	20	9	3	9	2	0	11	3	2	0	0	0	0	0	0	1	0	3	8	14	53	40	32	33
CH38	B1.2	000_Emulsion control	11	0	0	0	0	0	0	0	0	0	0	0	0	10	97	97	80	78	60	32	37	36	12	13	26	42	9	20	108	121	9	37	105	86	6	55	15	6	6	9	3	7	6	5	7	6	6
CH39	B1.3	000_Emulsion control	45	33	25	21	33	32	54	67	95	89	95	90	92	82	95	78	62	81	61	38	29	23	32	14	18	7	16	15	12	7	10	8	7	12	5	0	0	0	4	2	4	2	9	16	14	15	28
CH40	B1.4	000_Emulsion control	39	47	49	22	38	58	86	51	77	98	81	74	90	75	84	71	67	54	34	31	35	28	15	25	6	9	16	2	0	5	4	2	9	2	0	0	0	0	4	2	4	2	3	7	14	12	9
CH41	B1.5	000_Emulsion control	59	75	86	97	83	94	109	78	99	91	84	94	71	72	57	84	77	62	40	43	40	35	27	38	22	14	9	25	25	0	14	7	1	13	0	0	0	9	7	11	1	3	8	10	27	26	37
CH44	C1.2	003_400ug CBD	40	0	7	22	62	95	66	10	30	20	49	43	61	76	100	48	63	46	80	80	134	112	130	100	38	21	57	15	9	16	13	26	10	98	5	6	19	3	0	0	0	0	1	1	3	2	0
CH45	C1.3	003_400ug CBD	18	11	20	17	20	22	16	26	16	25	21	49	24	34	32	32	47	51	48	18	48	39	18	28	23	8	7	12	5	2	9	3	4	0	0	2	4	0	0	5	0	0	4	8	7	0	0
CH46	C1.4	003_400ug CBD	13	37	14	20	8	26	26	23	18	23	36	41	30	35	49	37	24	45	44	15	42	31	43	33	24	7	4	8	5	2	19	23	5	58	57	26	24	10	3	0	0	0	0	9	0	15	3
CH47	C1.5	003_400ug CBD	38	29	15	26	25	40	35	41	42	46	41	19	43	33	59	43	73	38	68	12	78	65	19	20	13	3	2	72	95	35	31	5	0	1	9	11	5	0	3	0	5	1	7	9	34	20	29
CH48	A1.6	001_Tween Control	58	32	37	28	57	83	103	97	132	126	136	133	126	104	97	99	68	81	61	77	50	54	46	47	85	31	26	26	54	14	7	0	0	0	2	0	0	11	3	2	19	4	24	26	28	14	20
CH49	A1.7	001_Tween Control	70	45	34	51	56	57	88	92	111	94	104	88	98	87	69	95	69	58	41	48	24	46	22	9	6	10	25	16	2	4	2	1	3	0	0	3	0	4	13	0	3	4	5	9	7	13	28
CH50	A1.8	001_Tween Control	63	73	61	84	110	90	87	102	97	113	105	89	81	93	96	57	59	42	29	23	24	12	40	40	28	4	4	2	3	4	0	2	0	0	0	0	2	0	0	1	7	5	25	32	31	19	34
CH51	A1.9	001_Tween Control	63	109	100	128	133	126	119	96	106	102	111	99	75	91	93	75	89	69	71	57	69	83	52	32	28	10	5	11	7	4	1	8	6	14	1	0	4	0	3	2	7	7	22	36	33	46	49
CH52	A1.10	001_Tween Control	100	125	131	144	134	137	131	129	112	106	115	122	121	132	148	135	129	149	122	147	147	151	105	106	81	104	107	75	83	70	61	22	2	1	0	6	5	18	9	19	47	80	105	132	167	186	223
CH54	B1.6	000_Emulsion control	35	58	34	20	22	29	69	60	78	88	88	94	94	102	94	90	82	102	71	95	49	45	49	26	22	14	13	13	19	3	5	7	15	3	0	0	4	0	1	3	4	5	7	0	12	4	20
CH55	B1.7	000_Emulsion control	51	75	41	33	36	51	29	56	84	77	92	105	126	132	128	90	90	102	86	53	49	33	10	23	27	11	38	14	18	17	4	4	4	0	7	7	0	0	5	2	0	2	4	4	6	20	43
CH56	B1.8	000_Emulsion control	48	67	37	46	51	49	58	74	88	79	73	85	91	108	83	71	77	84	56	57	54	42	26	39	25	28	17	6	10	10	10	3	0	2	2	0	0	0	0	20	10	1	13	12	14	17	40
CH57	B1.9	000_Emulsion control	49	65	76	84	77	69	63	87	84	78	92	95	82	92	62	68	52	50	34	44	39	54	23	42	29	25	21	22	19	12	16	26	7	2	3	3	1	2	1	2	21	11	14	22	57	63	96
CH59	C1.6	003_400ug CBD	42	21	23	32	55	28	37	46	35	33	43	38	66	73	79	70	75	88	74	73	75	62	78	57	61	44	77	103	116	68	129	91	59	47	70	44	22	8	7	0	4	7	12	18	29	31	32
CH60	C1.7	003_400ug CBD	34	36	9	13	46	15	34	28	37	38	65	53	44	61	77	37	52	73	58	54	46	48	59	82	40	19	49	42	14	13	50	36	6	25	9	30	21	22	12	13	19	12	15	11	7	3	12
CH61	C1.8	003_400ug CBD	33	22	10	13	18	34	16	18	28	38	32	23	40	30	31	63	26	36	43	35	35	14	24	38	17	7	9	17	6	6	7	9	12	6	10	7	6	1	3	2	0	1	0	2	1	2	32
CH62	C1.9	003_400ug CBD	27	30	27	18	40	37	24	37	29	80	60	54	43	71	33	49	40	51	67	39	35	12	37	26	16	24	34	18	31	14	15	20	9	11	1	13	15	5	0	0	0	0	0	5	2	0	8
CH63	C1.10	003_400ug CBD	46	42	28	44	38	25	46	66	69	100	33	62	70	63	57	52	36	72	42	89	80	28	25	30	21	15	34	15	5	18	32	41	47	16	46	22	13	11	0	0	0	0	4	9	1	16	15
CH64	A1.11	001_Tween Control	14	18	33	33	55	50	84	74	96	80	91	78	95	78	92	50	53	58	54	78	180	118	182	153	136	37	35	65	44	26	23	15	0	6	5	0	5	10	12	14	17	10	32	45	32	31	23
CH65	A1.12	001_Tween Control	85	63	76	92	103	84	119	103	108	110	125	89	115	108	103	98	80	46	59	65	45	34	17	23	33	18	16	10	4	2	50	11	0	3	0	2	11	4	9	2	9	8	18	19	25	26	25
CH66	A1.13	001_Tween Control	54	79	60	87	92	82	100	96	74	88	78	91	79	81	69	76	82	50	63	53	54	17	40	16	36	10	4	6	3	4	2	5	0	0	0	2	4	2	3	3	13	19	19	34	33	27	62
CH67	A1.14	001_Tween Control	111	85	105	102	89	108	97	99	97	99	101	99	126	77	103	108	75	91	88	72	89	65	68	24	33	35	37	59	53	74	60	41	70	6	5	73	16	18	15	38	56	124	147	199	134	156	156
CH70	B1.10	000_Emulsion control	33	38	35	54	50	61	86	75	90	73	102	102	105	97	109	99	74	83	95	71	108	83	69	122	148	206	116	99	133	123	33	115	12	15	45	6	2	1	5	10	12	5	0	13	32	15	23
CH71	B1.11	000_Emulsion control	51	51	41	33	22	44	60	59	76	105	68	71	90	92	97	64	68	42	51	48	10	37	41	17	39	6	7	12	4	24	12	0	5	1	2	0	0	2	5	5	4	2	5	18	9	16	22
CH72	B1.12	000_Emulsion control	38	67	50	63	59	70	77	78	107	86	56	85	83	75	87	59	48	50	44	41	47	42	41	93	83	71	24	24	11	2	6	4	7	7	0	0	0	2	2	0	12	14	39	33	47	44	48
CH73	B1.13	000_Emulsion control	57	101	137	141	87	111	108	123	97	87	94	74	85	91	73	76	76	73	50	82	54	72	85	104	101	105	199	163	128	145	134	179	154	168	124	89	108	63	35	35	66	165	186	186	205	202	214
CH76	C1.11	003_400ug CBD	43	38	31	32	35	50	32	33	55	82	55	71	71	68	84	114	70	73	52	43	50	47	54	51	43	54	87	14	63	34	34	34	22	28	31	13	15	21	8	0	2	2	0	0	8	8	6
CH77	C1.12	003_400ug CBD	56	20	23	29	11	47	48	26	58	43	44	52	32	62	67	29	56	30	52	46	22	44	40	71	73	58	30	32	43	15	30	71	15	13	33	24	12	43	1	0	2	0	5	1	6	18	22
CH78	C1.13	003_400ug CBD	34	29	37	39	34	42	31	22	53	40	50	50	38	44	46	46	52	69	57	43	28	43	36	36	14	20	25	29	19	43	59	59	30	18	6	12	20	2	6	0	0	0	10	9	5	3	34
CH79	C1.14	003_400ug CBD	61	60	39	53	69	61	71	89	78	96	92	79	119	85	90	87	57	69	95	73	53	67	28	40	32	67	69	101	38	62	28	101	98	78	59	22	26	11	5	47	80	4	16	33	50	112	125
CH81	A1.15	001_Tween Control	55	47	31	60	63	84	108	108	98	82	115	97	90	87	78	72	80	94	61	56	35	37	55	38	196	199	112	89	31	30	64	15	0	2	9	10	18	42	62	117	201	232	172	64	62	61	56
CH82	A1.16	001_Tween Control	64	65	74	73	78	83	75	87	78	105	76	89	78	67	69	76	77	70	77	48	85	120	105	109	47	27	19	20	14	174	258	214	158	90	55	28	9	7	28	21	27	70	84	116	132	148	136
CH87	B1.14	000_Emulsion control	65	52	46	59	53	93	86	114	114	130	106	81	93	78	84	82	77	48	50	41	22	33	73	108	145	197	151	32	75	90	214	38	84	23	0	2	0	0	0	9	4	4	5	7	4	5	2
CH88	B1.15	000_Emulsion control	65	68	87	99	86	100	116	124	117	126	122	109	120	100	99	98	87	73	73	56	50	76	98	79	98	53	41	47	81	194	174	210	234	246	215	212	194	177	151	155	174	200	230	223	190	158	155
CH93	C1.15	003_400ug CBD	29	40	15	35	42	27	42	31	74	56	66	43	68	82	69	58	45	78	85	72	35	52	50	60	72	82	64	68	96	86	81	83	118	150	120	100	73	60	95	58	29	37	91	121	140	133	147
CH94	C1.16	003_400ug CBD	19	42	28	28	17	32	48	42	30	44	39	36	49	64	62	58	35	52	82	45	34	35	39	34	39	39	28	30	19	46	118	76	57	59	33	19	15	16	15	6	2	9	20	18	30	76	61
CH113	A2.0	002_300ug CBD	54	113	25	5	10	10	8	2	11	1	0	0	1	1	0	0	0	0	0	0	0	0	0	0	0	0	0	0	0	0	0	0	0	0	0	0	0	0	0	0	0	0	0	0	0	0	0
CH114	A2.1	002_300ug CBD	66	57	55	95	30	29	53	47	62	67	82	48	64	47	45	75	46	52	53	106	31	41	38	86	58	25	64	13	19	23	18	37	91	92	7	0	0	7	0	3	21	10	48	40	8	45	19
CH115	A2.2	002_300ug CBD	32	42	27	28	8	27	46	84	47	70	30	12	35	12	24	27	16	29	16	33	25	21	23	2	16	11	44	95	47	25	38	52	43	32	23	4	4	15	21	8	19	30	42	4	29	20	60
CH118	B2.0	001_Tween Control	12	0	0	0	0	0	0	0	0	0	0	0	0	0	0	0	0	0	0	0	0	0	0	0	0	0	0	0	0	0	0	0	0	0	0	0	0	0	0	0	0	0	0	0	0	0	0
CH119	B2.1	001_Tween Control	69	56	39	22	49	98	103	54	79	91	95	93	99	72	72	77	43	34	47	45	43	36	19	19	11	18	7	5	11	6	42	20	131	27	11	3	6	0	17	3	3	14	5	1	7	4	21
CH120	B2.2	001_Tween Control	59	36	37	45	76	72	72	78	72	84	67	100	76	74	81	80	51	45	54	35	29	17	16	13	7	7	6	3	12	4	0	0	0	2	7	2	0	0	0	0	4	0	6	5	2	15	6
CH121	B2.3	001_Tween Control	67	60	55	73	61	72	31	69	39	28	41	33	29	28	28	9	9	23	5	6	2	1	5	2	2	0	0	4	0	2	0	0	0	0	0	1	0	0	0	0	0	0	0	1	1	0	0
CH124	C2.0	000_Emulsion control	49	6	6	0	0	0	0	0	0	0	0	0	0	0	0	0	0	0	0	0	0	0	0	0	0	0	0	0	0	0	0	0	0	0	0	0	0	0	0	0	0	0	0	0	0	0	0
CH125	C2.1	000_Emulsion control	22	19	18	12	34	29	47	45	53	72	65	60	58	57	70	65	62	46	36	17	54	41	22	19	42	15	31	36	91	67	24	12	4	19	3	2	1	2	0	0	2	4	2	3	2	8	10
CH126	C2.2	000_Emulsion control	32	32	38	79	53	54	60	66	78	83	95	94	70	71	83	40	63	91	48	60	30	33	21	34	12	15	9	6	5	9	6	4	1	0	2	2	0	2	1	2	2	0	4	1	2	1	11
CH128	A2.3	002_300ug CBD	73	60	51	43	86	81	85	74	86	84	121	129	117	118	134	122	113	95	92	86	99	80	64	101	150	153	175	94	59	73	9	27	2	32	105	92	58	42	83	16	149	103	44	41	46	30	66
CH129	A2.4	002_300ug CBD	48	47	28	36	42	59	51	58	69	61	88	88	100	104	53	83	70	87	85	81	82	23	20	38	41	17	10	22	26	2	6	4	39	29	91	0	0	15	27	0	21	9	12	12	46	30	46
CH130	A2.5	002_300ug CBD	44	33	18	40	30	54	51	25	38	28	50	48	49	68	74	48	59	58	63	50	34	30	30	18	33	30	7	6	33	18	25	18	12	16	23	0	0	0	13	33	6	11	7	24	51	63	37
CH131	A2.6	002_300ug CBD	28	35	48	30	38	26	61	81	64	54	71	41	48	53	33	55	51	41	32	28	34	40	48	88	38	8	21	12	14	15	18	5	18	9	8	5	10	16	3	1	4	18	26	59	41	43	53
CH132	A2.7	002_300ug CBD	40	47	50	84	50	80	63	73	69	61	60	57	30	37	44	42	46	36	42	45	22	37	40	45	41	39	54	77	119	49	16	56	41	11	19	13	0	24	20	19	53	74	67	33	52	80	58
CH134	B2.4	001_Tween Control	28	47	55	32	46	64	70	71	119	101	105	107	126	86	101	82	68	63	45	27	18	11	25	22	24	17	15	17	25	12	8	10	112	43	3	0	27	9	0	0	13	0	3	4	1	11	11
CH135	B2.5	001_Tween Control	69	48	30	34	51	57	58	91	76	91	98	102	76	78	54	70	44	43	49	27	19	29	16	8	6	4	5	49	28	12	6	0	6	13	0	2	0	0	7	1	5	0	2	9	24	22	15
CH136	B2.6	001_Tween Control	47	69	54	78	66	72	77	73	95	89	91	93	82	70	72	69	48	44	31	24	24	26	23	9	12	12	13	8	2	7	5	12	2	13	18	1	5	3	4	1	14	2	2	3	6	20	26
CH137	B2.7	001_Tween Control	49	62	75	70	95	61	59	73	53	69	74	81	69	54	51	50	55	49	39	23	16	19	10	16	15	2	2	1	2	1	2	0	2	0	4	8	0	2	1	4	8	4	5	15	9	30	18
CH139	C2.3	000_Emulsion control	27	19	13	12	13	33	42	55	57	62	46	64	73	66	73	89	78	79	63	28	50	39	39	24	24	30	16	12	4	2	9	3	8	5	2	3	5	0	0	3	0	1	1	6	8	4	12
CH140	C2.4	000_Emulsion control	37	34	9	10	23	19	30	56	91	74	67	93	75	76	102	69	57	81	60	37	19	53	45	39	22	12	12	3	11	93	132	81	79	14	0	0	2	3	5	15	3	16	1	2	0	2	5
CH141	C2.5	000_Emulsion control	33	31	20	14	18	16	37	40	60	56	70	73	90	90	82	78	78	69	50	24	30	32	45	102	23	32	16	13	18	11	0	3	13	8	1	0	0	2	0	1	0	5	8	0	3	6	10
CH142	C2.6	000_Emulsion control	38	33	40	55	61	55	78	80	84	101	72	93	73	72	63	81	49	66	63	41	36	37	15	13	25	9	8	4	1	7	1	5	3	2	0	0	0	5	0	2	8	4	2	0	13	1	28
CH143	C2.7	000_Emulsion control	80	101	138	129	133	115	117	117	116	115	102	111	73	75	79	87	72	90	49	46	49	35	61	66	32	25	27	19	12	11	9	13	6	21	1	0	3	0	0	0	0	6	3	6	52	33	49
CH144	A2.8	002_300ug CBD	42	25	58	28	69	62	60	55	88	100	132	110	112	104	129	113	95	78	93	84	135	85	43	64	33	51	48	44	35	12	17	44	38	19	16	34	2	9	5	20	9	15	35	49	77	48	71
CH145	A2.9	002_300ug CBD	46	44	26	21	28	22	25	25	44	65	99	80	71	81	89	90	83	73	36	64	31	30	27	34	14	30	14	12	39	0	23	79	20	25	0	0	0	1	2	0	7	10	14	8	11	59	69
CH146	A2.10	002_300ug CBD	43	62	15	19	49	52	98	63	65	73	73	68	50	55	84	70	78	52	36	57	60	46	21	12	61	69	38	65	119	57	19	23	7	0	0	0	0	0	0	0	28	4	15	10	23	75	51
CH147	A2.11	002_300ug CBD	47	56	19	26	24	46	76	63	33	45	61	56	37	64	73	51	42	43	47	49	34	35	40	46	23	24	21	18	19	2	22	56	18	12	14	0	0	1	2	4	2	7	13	41	60	71	95
CH148	A2.12	002_300ug CBD	69	50	33	36	76	90	124	100	108	74	118	113	91	89	85	57	44	84	92	73	87	96	93	70	52	85	59	55	47	41	45	39	71	32	61	26	12	4	8	47	14	38	100	101	114	114	131
CH150	B2.8	001_Tween Control	44	47	37	33	62	77	82	70	104	104	97	112	105	104	116	73	57	49	61	101	189	79	50	40	39	26	19	20	5	52	138	75	30	13	30	4	9	5	17	49	50	20	9	15	15	14	24
CH151	B2.9	001_Tween Control	65	76	31	51	42	63	82	94	112	121	101	85	77	100	74	70	74	94	54	42	29	24	26	12	11	27	13	8	5	13	20	19	8	3	2	1	0	0	5	7	2	2	2	5	15	7	22
CH152	B2.10	001_Tween Control	43	48	57	74	53	61	54	75	69	66	86	87	87	66	74	60	72	55	41	23	22	18	22	16	13	5	16	9	6	7	4	7	3	11	1	0	0	0	1	0	2	4	12	21	3	22	55
CH153	B2.11	001_Tween Control	94	114	98	119	118	116	108	114	122	108	104	102	103	81	101	90	62	65	75	52	40	34	40	26	30	18	15	11	14	14	15	12	4	0	0	9	0	5	0	23	8	6	20	40	48	86	49
CH155	C2.8	000_Emulsion control	40	27	28	15	12	20	61	63	80	52	68	80	99	101	80	64	79	120	65	101	116	125	115	103	68	46	42	36	24	21	12	9	2	3	5	0	1	0	0	0	3	6	2	2	12	14	7
CH156	C2.9	000_Emulsion control	34	36	28	17	12	33	43	65	65	59	95	111	90	92	65	98	68	71	62	133	82	43	53	14	24	21	21	9	6	12	14	6	6	4	0	0	1	1	5	4	5	5	4	5	3	12	23
CH157	C2.10	000_Emulsion control	54	60	28	35	44	44	27	49	76	89	76	91	86	89	86	61	54	50	36	48	52	34	38	12	16	9	9	5	10	10	7	7	11	7	0	0	1	1	0	0	3	1	7	5	4	5	8
CH158	C2.11	000_Emulsion control	52	75	45	74	59	78	76	81	109	116	117	80	77	96	78	81	101	77	50	24	31	50	43	28	29	32	4	14	13	14	5	8	10	2	0	5	4	0	0	2	10	1	3	9	14	13	30
CH159	C2.12	000_Emulsion control	65	105	131	129	133	113	110	127	121	119	84	99	104	109	116	94	77	81	51	69	32	46	40	58	107	75	70	74	54	55	77	38	27	1	8	4	2	0	3	0	5	9	12	20	63	82	107
CH160	A2.13	002_300ug CBD	18	16	8	27	36	36	32	27	29	50	55	70	60	68	53	74	67	52	61	48	49	89	78	86	80	66	64	63	63	93	55	48	43	142	211	98	7	15	19	38	12	28	30	73	104	104	76
CH161	A2.14	002_300ug CBD	27	56	78	31	46	47	124	47	67	81	74	88	87	74	80	96	61	51	66	61	66	39	42	52	85	53	17	20	29	90	106	117	79	23	1	14	0	2	3	46	7	4	41	50	135	119	96
CH162	A2.15	002_300ug CBD	76	53	36	75	49	86	81	64	73	68	42	82	84	98	84	56	89	40	85	117	40	62	54	26	38	51	35	17	27	64	44	42	48	12	4	0	2	1	3	1	0	11	36	30	71	66	86
CH163	A2.16	002_300ug CBD	53	49	38	40	41	57	61	61	79	91	60	81	78	61	66	49	58	89	46	53	56	25	25	46	21	52	35	46	99	138	148	96	48	27	9	4	2	2	0	9	11	44	47	101	98	122	119
CH166	B2.12	001_Tween Control	47	44	32	34	97	91	100	105	92	96	110	106	95	122	78	91	108	87	88	96	135	95	46	33	34	67	85	149	9	8	14	11	0	2	3	0	0	3	3	14	0	15	21	26	38	34	23
CH167	B2.13	001_Tween Control	57	45	58	57	77	75	79	94	107	79	85	88	84	79	66	56	41	46	47	30	35	39	17	76	203	57	37	31	17	43	79	46	33	169	193	176	133	118	59	87	39	12	14	18	16	24	39
CH168	B2.14	001_Tween Control	89	107	86	117	119	109	93	98	95	110	102	90	109	83	76	95	43	55	52	43	62	24	19	15	15	12	14	15	13	6	6	19	5	4	0	0	1	0	12	4	2	18	46	55	53	62	67
CH169	B2.15	001_Tween Control	78	94	115	125	135	121	107	128	112	106	109	108	94	93	106	96	123	113	92	99	65	46	61	79	55	52	65	73	88	150	161	162	156	157	166	181	137	131	165	220	236	254	241	243	240	220	214
CH172	C2.13	000_Emulsion control	37	60	35	24	47	21	46	50	87	79	73	90	67	81	70	64	60	63	42	34	106	121	78	115	69	17	29	39	117	44	22	134	34	126	146	122	133	24	19	11	18	7	48	85	5	6	37
CH173	C2.14	000_Emulsion control	60	55	37	21	50	51	43	65	93	88	95	103	93	83	75	66	82	84	86	48	29	50	45	25	22	59	10	7	5	10	71	30	2	6	0	1	2	1	0	5	3	2	11	18	4	15	20
CH174	C2.15	000_Emulsion control	67	67	81	64	75	85	101	90	120	117	108	89	73	91	100	82	84	48	44	44	50	67	63	42	35	14	19	17	25	14	28	15	7	8	12	0	2	0	1	1	3	10	28	37	48	82	73
CH175	C2.16	000_Emulsion control	51	67	79	87	96	98	96	87	77	90	53	69	73	76	80	89	52	69	34	58	60	50	50	58	95	73	117	116	167	166	161	161	185	165	139	98	124	94	67	69	59	100	145	217	226	223	216
CH208	A3.0	003_400ug CBD	28	46	37	24	36	58	37	73	78	69	99	68	110	100	90	122	125	73	123	78	144	78	87	98	83	68	37	101	118	68	5	18	21	1	11	10	21	9	2	4	9	10	37	24	55	38	48
CH209	A3.1	003_400ug CBD	34	21	71	35	47	56	26	11	42	97	90	40	93	65	66	73	72	75	64	53	62	53	42	57	17	10	27	39	14	68	57	31	1	20	10	2	4	0	3	0	34	52	19	71	38	41	25
CH210	A3.2	003_400ug CBD	39	35	20	18	69	34	37	20	34	19	60	36	9	58	52	48	49	67	67	72	36	42	37	41	10	17	10	21	12	15	17	17	0	8	0	0	0	0	0	5	2	1	2	16	7	28	1
CH211	A3.3	003_400ug CBD	20	17	14	29	13	10	16	27	22	15	16	38	13	19	26	28	28	20	29	25	34	16	14	22	32	7	27	28	12	42	6	3	2	5	27	6	2	0	0	16	35	17	37	18	9	12	15
CH214	B3.0	002_300ug CBD	71	57	83	57	59	62	55	49	70	88	95	111	126	113	126	132	131	120	122	105	76	83	95	105	105	181	96	51	90	97	38	14	12	6	24	17	40	103	8	0	0	51	5	13	0	21	70
CH215	B3.1	002_300ug CBD	37	24	31	28	43	44	19	33	18	39	52	57	41	47	83	75	71	62	51	57	56	48	49	62	42	62	48	66	160	143	44	48	20	9	8	0	0	0	0	1	2	7	0	3	9	26	17
CH216	B3.2	002_300ug CBD	56	40	48	20	55	45	70	53	82	45	66	62	46	35	57	60	48	47	58	67	25	40	19	36	40	17	31	68	81	41	42	33	26	15	22	27	10	0	0	1	3	1	11	15	23	35	56
CH217	B3.3	002_300ug CBD	91	67	76	37	35	40	56	56	44	89	37	62	45	31	29	31	45	19	49	52	9	11	20	7	20	16	39	26	35	58	36	14	4	15	5	1	1	0	4	0	2	8	2	8	9	32	29
CH220	C3.0	001_Tween Control	74	41	33	12	45	65	94	85	132	144	112	108	83	73	66	57	79	27	24	26	22	12	12	8	11	5	6	5	1	0	3	11	0	9	162	2	48	42	77	41	35	33	10	4	4	7	13
CH221	C3.1	001_Tween Control	58	26	21	29	61	52	48	71	90	92	110	106	108	78	78	76	75	49	44	26	41	46	48	5	8	24	24	17	4	6	7	2	13	1	0	0	7	0	0	7	6	5	6	0	3	7	3
CH222	C3.2	001_Tween Control	38	47	49	56	56	61	63	81	61	88	81	79	87	89	86	97	62	35	35	33	23	32	14	19	43	6	12	11	4	4	5	2	4	1	2	1	3	1	0	1	1	3	9	5	0	3	5
CH223	C3.3	001_Tween Control	66	67	86	94	97	92	111	92	102	112	90	78	76	89	94	87	67	47	53	53	39	41	20	41	39	21	47	45	27	4	2	14	10	2	0	0	2	5	1	8	3	13	0	21	6	4	13
CH224	A3.4	003_400ug CBD	40	38	23	46	31	45	25	43	36	65	56	68	72	85	101	78	75	84	86	60	44	15	17	29	47	59	17	58	42	58	69	26	27	47	8	4	23	60	25	5	3	7	14	23	24	33	62
CH225	A3.5	003_400ug CBD	37	34	24	40	51	26	66	35	57	88	81	68	61	69	73	82	80	74	66	71	60	51	28	23	17	29	13	32	22	115	65	21	13	45	3	14	19	4	9	57	44	19	26	32	7	26	10
CH226	A3.6	003_400ug CBD	42	56	22	46	30	14	38	63	44	47	77	28	60	53	51	92	41	45	43	79	118	51	29	69	30	45	61	24	90	26	15	11	46	4	5	7	12	0	0	5	5	5	3	12	37	7	36
CH227	A3.7	003_400ug CBD	32	53	16	23	32	39	61	57	55	65	48	41	19	17	17	33	30	52	50	32	28	34	23	23	22	22	40	26	10	24	15	16	31	14	9	6	2	0	0	0	0	7	1	0	7	19	26
CH228	A3.8	003_400ug CBD	34	61	48	34	80	51	105	95	80	82	109	65	62	55	52	57	57	65	97	88	52	78	76	66	106	83	122	110	70	81	98	35	71	148	80	25	24	62	26	61	80	78	81	78	135	72	40
CH230	B3.4	002_300ug CBD	48	71	59	66	22	7	31	38	61	72	70	113	115	87	132	119	112	100	129	78	82	67	89	100	131	56	46	27	73	44	97	147	50	34	23	40	19	13	8	2	0	6	6	11	16	41	23
CH231	B3.5	002_300ug CBD	41	39	29	43	27	25	33	24	35	46	40	55	74	79	77	66	62	71	62	54	63	41	29	47	31	20	15	17	49	11	27	0	4	51	18	7	8	5	2	1	10	0	10	3	16	6	7
CH232	B3.6	002_300ug CBD	48	60	33	32	26	56	30	57	57	25	56	69	55	41	54	54	58	47	61	52	64	17	22	39	51	61	12	24	19	19	45	18	9	10	5	2	3	0	0	0	3	11	32	48	59	29	27
CH233	B3.7	002_300ug CBD	64	72	39	50	46	55	73	93	76	94	75	86	67	43	25	53	39	53	36	60	27	23	47	29	44	24	15	52	10	40	60	61	81	140	24	106	17	33	7	1	0	5	7	2	11	15	66
CH235	C3.4	001_Tween Control	21	9	20	14	16	38	51	50	67	59	88	72	72	73	81	60	69	55	54	57	84	51	35	45	40	41	18	12	9	21	29	20	18	12	9	26	36	3	7	5	10	8	5	14	5	22	22
CH236	C3.5	001_Tween Control	33	21	16	39	35	38	53	60	65	96	88	76	89	85	93	73	73	46	77	71	39	29	29	29	16	5	16	5	17	24	22	8	20	7	2	1	27	0	4	0	3	3	3	33	14	7	4
CH237	C3.6	001_Tween Control	66	37	33	50	59	57	77	91	101	144	122	127	124	120	101	83	89	46	75	52	25	53	33	20	30	32	18	0	2	4	6	7	5	8	0	0	0	0	0	3	3	2	11	0	5	10	5
CH238	C3.7	001_Tween Control	62	48	58	99	93	82	94	92	93	114	119	109	109	110	104	82	89	89	96	38	59	45	20	11	17	5	13	8	14	0	6	1	10	3	0	0	0	0	2	0	2	5	0	1	4	14	7
CH239	C3.8	001_Tween Control	56	107	104	112	106	100	105	92	78	94	77	77	96	90	88	69	60	67	59	73	38	29	41	20	12	8	10	6	10	4	0	4	6	5	5	0	1	0	2	0	0	0	3	5	10	8	21
CH240	A3.9	003_400ug CBD	30	43	34	54	50	68	88	71	42	92	75	89	84	101	103	134	107	87	61	78	96	109	98	124	62	91	103	54	60	18	40	112	42	14	41	17	30	78	36	33	12	30	6	20	110	67	91
CH241	A3.10	003_400ug CBD	36	31	31	30	40	42	38	35	58	41	72	70	69	58	52	52	79	60	59	61	43	56	33	33	65	63	32	9	5	8	9	13	1	4	12	3	0	2	2	5	2	1	12	9	19	11	46
CH242	A3.11	003_400ug CBD	55	40	43	30	22	37	33	62	82	54	65	59	43	68	105	69	47	35	73	35	72	28	26	41	16	47	27	21	18	21	13	42	18	18	6	0	0	0	3	2	5	22	9	10	17	44	58
CH243	A3.12	003_400ug CBD	55	38	21	39	55	48	74	46	49	65	52	37	54	42	40	18	52	68	55	46	32	21	37	75	70	40	24	24	48	33	25	26	39	28	19	13	0	0	3	14	3	19	17	10	22	92	99
CH244	A3.13	003_400ug CBD	27	49	40	50	42	52	61	60	53	50	38	48	50	59	55	66	41	58	44	42	66	66	78	99	84	79	82	48	65	87	39	39	15	53	19	34	72	48	5	16	39	60	49	72	68	84	81
CH246	B3.8	002_300ug CBD	56	68	21	38	40	49	72	63	38	53	77	89	70	104	90	77	101	107	82	90	120	111	64	37	79	252	199	174	73	189	234	168	200	201	86	108	85	0	11	23	8	24	4	20	28	10	15
CH247	B3.9	002_300ug CBD	86	42	40	46	39	47	39	73	48	72	43	42	75	62	72	86	74	76	53	62	53	39	54	65	41	69	98	89	55	47	63	18	62	55	21	10	0	2	0	0	9	6	11	35	26	25	59
CH248	B3.10	002_300ug CBD	37	63	43	65	20	61	44	70	72	74	80	97	88	40	41	68	51	52	50	59	52	50	61	72	24	39	61	90	110	116	24	10	34	13	38	41	20	1	0	0	0	0	2	93	58	85	23
CH249	B3.11	002_300ug CBD	57	85	45	68	35	34	78	71	101	87	81	47	33	38	59	21	33	39	43	26	60	42	33	26	19	10	11	27	21	28	17	46	29	16	41	43	99	88	101	72	73	43	46	27	33	43	84
CH251	C3.9	001_Tween Control	19	17	2	12	21	32	40	48	45	58	49	64	51	58	57	51	49	65	48	50	44	51	43	26	34	33	23	6	10	5	9	25	7	14	4	5	6	6	26	14	25	8	3	8	15	23	39
CH252	C3.10	001_Tween Control	43	45	19	32	41	46	61	46	88	99	91	94	119	90	79	84	66	65	72	39	65	37	24	23	43	53	54	30	29	39	39	68	129	23	13	1	14	7	7	3	9	33	15	6	6	2	7
CH253	C3.11	001_Tween Control	45	32	44	30	40	54	64	74	92	88	90	98	94	70	100	72	73	73	100	67	26	48	13	14	33	16	8	5	9	4	5	7	5	7	0	0	9	2	7	0	5	3	8	5	5	9	4
CH254	C3.12	001_Tween Control	46	44	62	67	66	64	93	57	75	105	90	98	99	99	73	57	59	78	45	24	27	20	21	14	31	79	41	45	12	3	2	2	7	29	21	5	1	1	0	0	3	0	7	15	19	18	18
CH255	C3.13	001_Tween Control	64	97	155	117	130	137	104	107	111	111	102	90	101	98	86	94	87	68	71	43	86	45	44	115	107	84	98	53	69	45	60	37	26	26	8	42	2	8	3	2	3	2	8	7	34	114	139
CH257	A3.14	003_400ug CBD	60	90	84	116	43	63	69	46	39	78	109	101	73	68	149	91	115	31	57	74	43	60	28	53	34	25	109	113	86	38	37	42	34	28	32	158	124	140	84	112	105	70	19	54	113	50	114
CH258	A3.15	003_400ug CBD	77	60	25	49	62	25	45	49	57	62	40	50	65	57	56	43	44	42	51	41	37	32	25	17	65	18	44	52	11	35	30	32	11	58	35	27	6	50	22	7	12	9	1	36	53	130	117
CH259	A3.16	003_400ug CBD	89	60	62	33	68	68	71	114	111	81	85	90	77	70	113	80	70	67	50	56	30	78	118	65	59	69	97	66	125	63	72	128	158	55	134	119	98	92	5	12	9	16	89	171	181	138	165
CH262	B3.12	002_300ug CBD	53	38	66	57	57	56	95	85	112	93	87	82	95	95	122	138	103	91	86	75	32	88	129	83	55	170	90	121	160	95	63	78	80	38	47	33	47	67	5	1	1	2	15	23	50	134	89
CH263	B3.13	002_300ug CBD	40	28	28	31	28	25	25	33	68	64	58	43	48	39	58	23	67	77	31	43	43	24	35	54	46	27	33	18	79	137	42	74	62	78	131	250	240	179	138	154	131	186	206	226	138	115	189
CH264	B3.14	002_300ug CBD	60	30	31	29	87	48	73	86	79	66	67	74	84	62	31	63	55	63	35	30	45	21	34	35	30	36	13	30	22	84	40	29	73	35	11	40	5	0	2	0	27	12	10	47	84	151	187
CH265	B3.15	002_300ug CBD	47	85	66	83	101	116	76	111	108	109	109	120	85	70	108	71	58	101	51	69	53	33	91	105	38	38	52	46	48	115	123	149	83	68	87	81	76	48	2	30	50	39	112	95	125	188	156
CH268	C3.14	001_Tween Control	39	30	42	58	62	69	102	89	119	130	104	104	107	98	90	78	102	76	95	121	82	67	58	62	67	52	45	30	40	41	14	13	13	55	183	152	79	94	59	21	51	119	115	31	39	18	40
CH269	C3.15	001_Tween Control	69	66	52	49	47	82	64	88	83	101	97	85	91	99	41	78	98	46	79	46	35	40	47	21	14	23	0	9	8	5	10	10	6	16	2	0	2	7	19	2	5	35	137	218	190	114	68
CH270	C3.16	001_Tween Control	50	63	74	71	112	61	89	109	96	92	78	95	84	87	72	59	71	55	61	42	37	27	14	21	18	6	16	5	2	13	6	3	5	3	2	0	0	9	7	7	11	2	9	22	51	77	94
CH289	A4.0	000_Emulsion control	18	8	15	18	26	39	34	58	52	41	44	47	43	34	53	55	63	71	34	30	48	45	35	54	94	107	60	89	27	17	7	3	7	2	0	5	5	7	7	14	4	4	8	19	28	17	9
CH290	A4.1	000_Emulsion control	32	35	33	33	55	54	78	92	82	79	104	78	83	75	66	79	103	70	123	76	85	35	67	16	49	41	42	70	22	21	58	96	19	12	32	1	9	24	44	32	4	36	33	23	36	19	53
CH295	B4.0	003_400ug CBD	16	32	39	20	27	23	11	18	41	25	37	43	69	41	57	61	67	63	47	35	54	45	41	46	32	53	81	38	34	42	36	27	39	37	13	0	0	13	2	0	6	0	0	2	3	9	30
CH296	B4.1	003_400ug CBD	23	10	9	14	31	24	14	10	19	36	12	13	65	29	29	19	28	17	45	14	23	41	65	84	22	11	28	42	29	22	14	6	14	22	46	18	19	27	9	0	0	1	17	2	6	17	15
CH301	C4.0	002_300ug CBD	40	47	66	53	36	32	74	41	70	84	67	70	61	59	75	88	78	86	57	87	43	50	52	74	35	65	34	16	31	17	24	63	10	8	82	137	57	18	9	91	2	9	31	31	33	13	8
CH302	C4.1	002_300ug CBD	34	12	13	22	37	28	24	41	34	45	59	58	67	53	43	32	54	50	30	11	31	30	29	27	31	25	43	56	21	50	30	5	0	7	14	5	0	0	1	10	9	5	19	5	4	9	15
CH304	A4.2	000_Emulsion control	32	25	12	49	41	52	54	43	59	58	69	67	44	53	49	65	48	36	24	19	36	42	100	97	69	27	17	12	10	14	10	18	31	2	0	0	0	4	2	10	70	14	4	21	23	14	25
CH305	A4.3	000_Emulsion control	49	25	16	53	33	59	59	77	62	68	99	77	68	91	96	82	63	60	60	32	26	20	9	34	19	15	6	12	5	10	6	2	0	0	0	0	4	13	3	4	3	7	10	5	9	5	11
CH306	A4.4	000_Emulsion control	40	51	42	52	51	53	53	68	92	76	64	69	63	80	64	57	69	53	37	46	29	26	16	14	17	28	8	10	6	8	8	7	1	4	15	6	0	9	3	15	3	4	26	7	20	11	23
CH307	A4.5	000_Emulsion control	24	42	70	59	58	40	53	51	77	42	53	46	48	57	69	74	62	30	28	24	30	8	23	19	2	6	14	8	6	24	1	6	4	1	2	1	3	2	14	7	9	1	8	30	16	30	29
CH310	B4.2	003_400ug CBD	42	37	20	30	60	73	86	56	62	51	79	56	81	97	102	139	110	67	86	81	86	115	124	48	30	132	167	95	71	37	63	74	50	113	132	78	127	129	64	51	36	33	6	22	20	61	47
CH311	B4.3	003_400ug CBD	35	47	17	38	37	23	31	33	29	34	59	69	58	36	34	43	27	51	29	53	75	34	17	42	41	31	18	33	21	39	36	64	40	11	7	4	5	23	0	0	2	9	35	34	9	10	46
CH312	B4.4	003_400ug CBD	40	58	19	21	22	51	46	31	35	24	36	32	41	46	49	27	46	45	19	26	12	47	18	19	9	27	64	42	12	11	55	5	18	21	0	8	29	60	18	14	17	25	10	12	29	60	42
CH313	B4.5	003_400ug CBD	34	27	21	14	20	9	42	48	36	59	57	39	33	24	41	22	37	19	54	45	30	44	17	24	83	57	11	22	18	51	16	102	79	27	17	18	53	10	4	4	30	59	110	136	164	125	83
CH316	C4.2	002_300ug CBD	50	67	58	74	82	30	77	62	47	67	116	118	149	122	122	104	104	95	82	102	110	87	99	72	94	131	84	78	83	99	62	53	53	36	22	37	129	56	85	82	54	54	40	20	21	33	20
CH317	C4.3	002_300ug CBD	29	53	41	10	26	17	48	61	28	35	69	91	56	86	64	67	65	65	58	41	54	25	26	27	26	91	46	29	6	106	29	24	29	31	28	10	33	80	29	0	7	21	11	9	49	37	8
CH318	C4.4	002_300ug CBD	24	23	20	15	23	27	12	18	22	33	24	40	24	36	51	36	49	58	37	27	18	27	18	14	28	22	20	12	5	3	13	23	6	6	10	5	7	4	6	0	0	3	3	0	16	12	5
CH319	C4.5	002_300ug CBD	47	31	36	38	61	47	60	54	117	108	49	80	80	60	81	57	71	66	43	37	9	34	12	33	29	32	30	44	68	32	26	14	18	76	52	68	69	76	80	31	8	31	8	21	7	11	30
CH320	A4.6	000_Emulsion control	43	27	13	27	16	37	38	60	49	82	66	78	86	63	81	92	68	45	34	54	45	52	16	18	30	50	25	22	14	9	5	9	4	0	2	2	1	0	2	10	2	2	6	16	8	3	36
CH321	A4.7	000_Emulsion control	49	46	38	18	26	33	62	65	74	108	111	107	105	103	103	90	94	73	78	62	38	34	46	14	20	6	12	10	7	5	4	0	0	1	0	0	0	3	12	1	8	8	2	14	18	15	25
CH322	A4.8	000_Emulsion control	62	62	48	46	74	61	87	75	89	89	102	100	102	88	92	104	108	88	73	76	71	54	31	37	11	22	33	18	18	6	6	1	9	2	0	0	0	1	2	5	5	9	5	10	22	25	27
CH323	A4.9	000_Emulsion control	46	82	98	95	68	66	78	72	78	101	94	76	84	59	81	59	62	55	66	81	55	59	58	37	30	57	30	20	18	14	15	18	40	8	5	0	0	1	8	14	25	25	44	48	52	59	55
CH324	A4.10	000_Emulsion control	43	83	116	122	101	124	113	113	111	96	104	111	88	96	84	85	84	69	78	99	90	84	79	91	126	97	101	72	72	117	127	96	198	130	107	70	114	168	85	106	74	106	159	198	205	183	191
CH326	B4.6	003_400ug CBD	24	12	25	49	36	53	43	45	60	38	61	31	81	116	101	86	112	75	69	72	105	126	32	94	96	33	101	102	89	119	51	41	44	30	25	38	13	6	67	13	90	80	200	229	225	122	104
CH327	B4.7	003_400ug CBD	32	22	8	18	13	31	30	12	20	35	34	42	68	41	60	35	41	21	41	26	31	19	27	6	21	3	29	8	19	17	27	65	27	21	17	27	40	2	35	17	2	4	22	10	0	24	4
CH328	B4.8	003_400ug CBD	46	66	47	50	23	24	24	37	30	63	71	54	67	51	52	57	42	23	26	49	41	40	18	17	37	30	27	12	9	14	22	17	4	9	14	37	61	0	0	2	0	3	15	0	8	9	9
CH329	B4.9	003_400ug CBD	57	35	12	37	20	51	58	18	43	24	47	47	32	45	24	40	51	36	31	38	16	8	27	19	18	40	28	38	21	15	28	3	33	20	11	1	1	1	0	2	3	2	2	23	19	13	21
CH331	C4.6	002_300ug CBD	32	41	59	75	42	45	77	106	89	85	102	101	114	127	126	99	120	111	119	107	99	112	121	137	168	218	220	138	194	161	74	118	199	168	140	171	80	9	4	3	2	13	14	21	96	78	40
CH332	C4.7	002_300ug CBD	41	47	20	41	52	60	52	42	48	52	80	76	81	103	98	90	89	104	117	97	76	60	69	68	74	44	76	33	33	22	33	14	13	26	53	63	18	0	35	6	1	2	0	16	44	44	42
CH333	C4.8	002_300ug CBD	58	23	22	37	37	25	36	61	43	47	54	43	70	60	71	81	85	74	71	50	58	64	61	24	37	18	50	49	23	68	80	28	20	21	33	31	17	6	8	0	6	0	7	1	10	56	30
CH334	C4.9	002_300ug CBD	34	38	28	23	61	43	21	58	35	48	49	72	62	58	62	79	53	76	51	82	45	36	50	45	9	27	30	35	11	16	36	40	28	22	10	0	0	4	0	3	0	0	4	9	35	13	25
CH335	C4.10	002_300ug CBD	72	69	68	62	80	74	79	87	82	106	79	81	69	66	56	72	58	83	71	40	57	37	50	47	31	39	45	49	51	69	46	30	11	41	29	16	21	11	30	19	4	0	6	6	13	32	12
CH336	A4.11	000_Emulsion control	37	35	45	22	37	55	56	51	71	94	83	83	100	86	113	113	84	31	46	21	32	121	96	29	30	56	5	34	18	21	27	13	11	0	2	1	4	9	6	1	14	3	9	20	14	10	20
CH337	A4.12	000_Emulsion control	57	73	33	31	41	43	78	84	77	115	109	110	96	102	83	79	83	56	60	56	56	52	26	10	19	8	8	8	2	8	6	5	25	35	27	15	67	99	70	61	30	4	34	49	51	26	13
CH338	A4.13	000_Emulsion control	67	96	73	81	72	96	109	109	122	139	101	108	104	93	123	131	96	101	58	93	90	82	81	107	31	19	14	53	35	7	2	4	4	0	2	2	0	11	3	4	6	15	15	55	33	37	64
CH339	A4.14	000_Emulsion control	45	102	118	118	90	115	95	119	103	86	85	101	93	72	85	81	80	49	75	61	49	79	101	91	57	30	32	103	77	28	52	43	30	20	19	16	12	5	10	24	26	46	102	107	145	118	149
CH342	B4.10	003_400ug CBD	24	40	23	49	27	34	38	32	29	44	46	66	71	72	62	41	57	61	104	31	117	48	67	42	44	21	37	38	50	34	118	113	130	11	16	5	25	32	43	32	28	6	6	7	15	5	44
CH343	B4.11	003_400ug CBD	58	42	27	46	45	31	36	47	27	47	34	57	31	30	34	45	54	36	61	65	32	61	43	70	35	33	6	28	7	9	21	23	33	4	5	6	7	8	0	0	2	13	3	53	115	202	218
CH344	B4.12	003_400ug CBD	65	68	34	35	32	43	61	86	54	64	73	74	85	33	49	57	51	41	45	51	28	36	30	30	30	28	30	55	5	18	26	62	39	10	3	5	2	0	1	0	6	9	0	4	9	23	33
CH345	B4.13	003_400ug CBD	37	40	24	33	23	26	61	69	50	71	44	41	21	50	48	41	70	62	46	34	28	29	39	41	53	22	30	22	61	17	36	39	40	57	40	17	11	3	25	4	6	8	9	16	29	51	82
CH348	C4.11	002_300ug CBD	47	57	38	44	60	57	69	46	88	62	96	90	57	95	90	98	68	89	112	69	80	87	60	46	49	64	56	80	75	41	27	43	46	12	7	37	24	5	2	9	1	3	15	10	52	21	21
CH349	C4.12	002_300ug CBD	31	31	24	37	45	22	44	46	44	49	56	81	78	92	101	89	92	68	85	73	81	50	33	46	34	71	9	70	7	18	34	16	39	22	37	2	5	0	18	10	26	0	28	15	18	18	22
CH350	C4.13	002_300ug CBD	35	49	41	41	63	47	47	77	65	56	72	91	76	91	67	77	60	54	42	61	60	47	63	63	67	39	20	22	52	61	44	37	36	14	74	7	7	5	5	0	0	0	0	10	14	19	24
CH351	C4.14	002_300ug CBD	62	54	38	57	47	62	76	80	69	80	91	73	64	39	64	65	60	38	47	44	33	47	29	22	45	47	17	22	17	84	51	26	31	35	42	14	35	18	50	20	23	48	20	21	61	95	123
CH353	A4.15	000_Emulsion control	50	51	57	53	80	88	109	95	88	104	99	122	87	95	88	95	103	81	91	93	119	121	108	98	111	94	75	91	116	81	21	62	116	114	133	80	74	69	34	18	12	26	7	34	31	34	45
CH354	A4.16	000_Emulsion control	42	73	63	90	69	68	79	97	72	84	70	75	77	65	72	73	67	62	46	22	52	76	17	32	54	87	8	17	18	6	10	9	18	3	6	3	7	4	2	16	17	2	31	65	37	20	45
CH359	B4.14	003_400ug CBD	81	115	91	65	55	47	44	62	65	61	58	92	105	63	51	70	21	22	35	59	40	45	56	60	60	56	49	19	59	27	29	78	71	32	14	49	7	2	7	20	55	16	6	106	170	109	76
CH360	B4.15	003_400ug CBD	70	81	20	41	58	16	18	50	52	41	68	52	70	58	32	45	72	37	31	45	45	33	40	22	24	27	35	8	21	20	31	23	36	92	76	25	23	48	30	29	0	23	32	40	28	40	74
CH365	C4.15	002_300ug CBD	37	29	55	27	49	77	45	67	52	67	76	76	68	51	58	61	56	91	80	42	115	54	27	22	26	16	91	9	63	18	18	86	134	19	16	7	2	4	0	0	2	4	9	22	14	80	125
CH366	C4.16	002_300ug CBD	61	66	29	43	36	62	82	104	63	62	98	80	70	63	35	62	68	24	34	46	37	80	39	45	32	75	33	52	11	12	42	36	31	43	7	32	2	1	0	3	0	1	14	7	21	18	48
[truncated: 98 more columns]

## Sheet: CBD ex4 tR
DATE:	2023-07-28 12:53:24
FILE:	C:\Software\WMicrotracker One\wmicrotracker_w8_v30api\wmicrotracker\p00027\20230725_1221
SUBPROJECT:	2023 0728 wDAT CBD 500-1000ug EP4 ex4 tR
<<<<<< Group Activity: Average Activity Counts per Data Interval>>>>>>
Group/Time[m]	30	60	90	120	150	180	210	240	270	300	330	360	390	420	450	480	510	540	570	600	630	660	690	720	750	780	810	840	870	900	930	960	990	1020	1050	1080	1110	1140	1170	1200	1230	1260	1290	1320	1350	1380	1410	1440	1470
000_emulsion control	46	50	44	42	45	49	59	62	70	75	72	72	75	74	72	71	65	59	53	49	46	45	41	40	37	33	32	28	32	30	32	31	23	21	17	14	15	10	11	16	22	24	31	41	41	46	48	51	52
001_500ug CBD	41	27	26	27	28	23	20	19	24	24	34	35	35	34	37	40	42	40	43	39	44	35	38	40	38	34	36	35	33	32	34	40	45	46	38	40	44	45	38	27	23	26	26	26	28	32	38	44	48
002_750ug CBD	36	24	23	28	32	24	22	15	19	17	22	24	28	34	36	34	36	36	35	31	39	43	41	34	33	33	40	40	37	29	32	32	36	35	34	38	35	35	35	34	34	32	30	27	23	27	32	29	27
003_1000ug CBD	36	19	21	22	29	20	19	16	13	15	17	19	20	23	29	33	32	25	27	31	30	34	34	30	30	29	32	31	22	26	27	28	27	32	32	30	33	35	35	37	34	30	36	36	29	23	25	25	22
<<<<<< Group Activity: Standard Error >>>>>>
Group/Time[m]	30	60	90	120	150	180	210	240	270	300	330	360	390	420	450	480	510	540	570	600	630	660	690	720	750	780	810	840	870	900	930	960	990	1020	1050	1080	1110	1140	1170	1200	1230	1260	1290	1320	1350	1380	1410	1440	1470
000_emulsion control	1.2	1.7	2.3	3.5	1.7	5.2	7.5	5.2	4.6	4	5.2	5.8	8.7	8.1	7.5	9.2	6.9	5.8	6.9	8.7	9.2	5.8	4.6	4.6	3.5	2.3	3.5	2.3	4	2.9	3.5	2.9	2.3	2.9	4.6	1.7	1.7	1.2	1.2	1.7	4.6	3.5	3.5	1.7	1.2	2.3	0.6	0.6	1.2
001_500ug CBD	2.9	2.3	2.9	0.6	2.3	1.7	1.2	1.2	1.7	2.3	3.5	2.9	3.5	4.6	4.6	3.5	5.8	7.5	6.4	4.6	4.6	3.5	4.6	8.7	8.7	6.9	4.6	5.2	6.9	4	4.6	3.5	6.4	4.6	3.5	2.3	7.5	11	8.1	1.7	1.7	1.2	4.6	5.8	7.5	5.2	4	5.8	6.9
002_750ug CBD	1.2	1.7	1.2	2.3	1.7	0.6	2.3	2.3	2.9	1.7	4.6	1.7	1.2	2.9	1.7	0.6	1.2	3.5	1.2	0.6	4.6	4	2.3	1.2	5.2	1.7	4	5.2	1.2	1.2	4	3.5	2.9	1.7	3.5	5.2	3.5	4.6	3.5	9.8	6.4	5.8	7.5	8.7	6.4	5.2	5.2	6.9	4
003_1000ug CBD	5.8	2.9	4	3.5	4.6	2.3	2.9	4	1.2	0.6	2.3	3.5	1.7	2.3	5.2	5.2	1.7	0.6	2.3	2.3	2.3	5.8	5.2	2.9	0.6	3.5	4	4.6	1.2	4.6	6.4	6.4	3.5	6.9	5.8	1.7	4.6	6.9	5.2	4.6	3.5	2.9	5.8	4.6	3.5	4	6.4	5.8	2.3
<<<<<< Group Activity: Number of wells/group >>>>>>
Group/Time[m]	30	60	90	120	150	180	210	240	270	300	330	360	390	420	450	480	510	540	570	600	630	660	690	720	750	780	810	840	870	900	930	960	990	1020	1050	1080	1110	1140	1170	1200	1230	1260	1290	1320	1350	1380	1410	1440	1470
000_emulsion control	3	3	3	3	3	3	3	3	3	3	3	3	3	3	3	3	3	3	3	3	3	3	3	3	3	3	3	3	3	3	3	3	3	3	3	3	3	3	3	3	3	3	3	3	3	3	3	3	3
001_500ug CBD	3	3	3	3	3	3	3	3	3	3	3	3	3	3	3	3	3	3	3	3	3	3	3	3	3	3	3	3	3	3	3	3	3	3	3	3	3	3	3	3	3	3	3	3	3	3	3	3	3
002_750ug CBD	3	3	3	3	3	3	3	3	3	3	3	3	3	3	3	3	3	3	3	3	3	3	3	3	3	3	3	3	3	3	3	3	3	3	3	3	3	3	3	3	3	3	3	3	3	3	3	3	3
003_1000ug CBD	3	3	3	3	3	3	3	3	3	3	3	3	3	3	3	3	3	3	3	3	3	3	3	3	3	3	3	3	3	3	3	3	3	3	3	3	3	3	3	3	3	3	3	3	3	3	3	3	3
<<<<<< Number of Samples per Acquisition Interval [1unit=500values] >>>>>>
Time[m]	30	60	90	120	150	180	210	240	270	300	330	360	390	420	450	480	510	540	570	600	630	660	690	720	750	780	810	840	870	900	930	960	990	1020	1050	1080	1110	1140	1170	1200	1230	1260	1290	1320	1350	1380	1410	1440	1470
#Samples	30	30	30	30	30	30	30	30	30	30	30	30	30	30	30	30	30	30	30	30	30	30	30	30	30	30	30	30	30	30	30	30	30	30	30	30	30	30	30	30	30	30	30	30	30	30	30	30	30
<<<<<< Average Temperature [°C] >>>>>>
Time[m]	30	60	90	120	150	180	210	240	270	300	330	360	390	420	450	480	510	540	570	600	630	660	690	720	750	780	810	840	870	900	930	960	990	1020	1050	1080	1110	1140	1170	1200	1230	1260	1290	1320	1350	1380	1410	1440	1470
Temp[°C]	22.6	22.6	22.6	22.6	22.6	22.8	22.8	22.8	22.6	22.8	22.8	22.8	22.8	22.8	22.8	22.8	22.8	22.8	22.8	22.6	22.8	22.6	22.6	22.6	22.6	22.6	22.6	22.6	22.6	22.6	22.6	22.6	22.6	22.6	22.6	22.6	22.6	22.6	22.6	22.6	22.6	22.6	22.6	22.6	22.6	22.8	22.8	22.6	22.8
<<<<<< Well Activity >>>>>>
Well	Group/Time[m]	30	60	90	120	150	180	210	240	270	300	330	360	390	420	450	480	510	540	570	600	630	660	690	720	750	780	810	840	870	900	930	960	990	1020	1050	1080	1110	1140	1170	1200	1230	1260	1290	1320	1350	1380	1410	1440
A1	001_500ug CBD	36	23	25	26	25	20	19	18	27	28	31	29	30	26	30	33	33	29	32	32	34	29	30	25	24	22	26	26	19	24	25	34	35	37	32	36	29	25	22	23	21	29	32	33	34	28	34	38
B1	000_emulsion control	46	46	42	39	43	41	49	52	61	67	62	61	58	57	57	53	52	47	40	33	27	33	32	31	30	30	25	26	34	34	30	33	26	25	23	17	17	11	13	18	30	29	37	44	42	44	47	50
C1	003_1000ug CBD	27	17	19	18	24	16	15	10	12	15	14	13	16	20	20	24	29	24	22	29	26	25	27	30	29	24	25	25	20	21	18	22	24	20	22	27	24	21	25	31	30	26	24	29	25	19	25	25
A2	002_750ug CBD	37	22	24	33	30	23	22	13	21	19	29	23	30	33	37	34	35	32	35	30	30	37	38	32	23	31	32	31	38	28	24	25	33	36	32	28	29	27	29	16	22	21	18	13	10	20	27	29
B2	001_500ug CBD	41	30	22	28	32	25	20	17	22	20	30	37	32	36	35	42	41	37	44	37	48	36	38	39	36	46	40	36	42	38	40	41	42	47	41	41	48	48	49	29	23	25	28	30	37	43	46	56
C2	000_emulsion control	44	51	41	38	43	48	54	65	73	79	78	73	81	82	80	82	69	66	61	61	54	50	45	43	41	33	34	25	24	24	27	25	25	22	21	12	16	11	11	12	15	18	26	41	39	43	48	50
A3	003_1000ug CBD	35	16	16	20	26	20	17	15	12	15	21	20	22	21	29	34	33	26	28	28	30	33	32	25	31	35	32	27	24	22	24	21	24	34	32	33	38	43	41	46	41	36	41	44	35	31	35	35
B3	002_750ug CBD	37	22	25	27	36	24	25	19	23	14	22	21	27	39	38	35	35	43	33	32	44	50	46	33	34	32	44	49	38	29	37	36	42	37	29	40	41	42	40	50	35	34	43	42	30	37	42	41
C3	001_500ug CBD	46	28	32	27	26	24	22	21	23	24	40	38	42	41	46	45	53	55	53	47	49	41	46	55	53	35	41	43	38	35	36	46	57	53	42	44	54	62	42	29	26	25	17	14	13	26	33	38
A4	000_emulsion control	47	52	48	49	49	58	73	68	75	80	76	81	86	82	80	77	74	63	59	54	56	51	45	45	41	37	37	32	38	31	38	35	19	15	8	14	12	8	10	18	20	25	29	39	41	50	48	52
B4	003_1000ug CBD	47	25	29	29	38	24	25	23	16	16	17	24	22	28	38	42	35	25	30	35	34	44	44	35	29	28	39	40	23	36	40	40	34	43	42	29	36	40	38	35	30	29	43	34	26	20	14	16
C4	002_750ug CBD	34	27	21	25	31	24	18	12	14	18	14	27	27	30	33	34	38	33	36	30	44	41	40	36	41	37	43	41	35	31	36	36	34	31	40	45	34	36	35	37	44	41	28	25	28	25	27	18
<<<<<< Channel Activity >>>>>>
Channel	Well	Group/Time[m]	30	60	90	120	150	180	210	240	270	300	330	360	390	420	450	480	510	540	570	600	630	660	690	720	750	780	810	840	870	900	930	960	990	1020	1050	1080	1110	1140	1170	1200	1230	1260	1290	1320	1350	1380	1410
CH17	A1.0	001_500ug CBD	45	9	0	0	0	0	0	0	0	0	0	0	0	0	0	0	0	0	0	0	0	0	0	0	0	0	0	0	0	0	0	0	0	0	0	0	0	0	0	0	0	0	0	0	0	0	0
CH18	A1.1	001_500ug CBD	57	34	40	53	25	12	21	2	41	11	30	54	28	19	26	28	24	77	28	28	59	52	73	35	38	5	10	5	6	32	19	53	18	16	9	27	43	24	30	24	10	40	29	51	34	4	42
CH23	B1.0	000_emulsion control	28	0	0	0	0	0	0	0	0	0	0	0	0	0	0	0	0	0	0	0	0	0	0	0	0	0	0	0	0	0	0	0	0	0	0	0	0	0	0	0	0	0	0	0	0	0	0
CH24	B1.1	000_emulsion control	22	20	34	18	37	27	44	35	42	48	37	45	45	43	48	47	30	18	19	21	18	16	25	21	15	19	5	6	3	2	5	8	2	1	2	0	0	2	0	0	5	0	2	7	5	16	3
CH29	C1.0	003_1000ug CBD	18	12	48	27	25	28	9	2	4	2	0	9	8	2	16	5	8	41	18	15	6	19	9	9	15	7	10	5	9	14	5	10	5	0	3	3	15	9	19	31	0	3	6	4	21	3	9
CH30	C1.1	003_1000ug CBD	12	62	34	43	31	13	19	27	35	16	7	12	18	7	21	4	7	7	31	24	11	20	9	15	62	60	65	12	1	8	11	30	6	24	40	8	4	15	10	8	86	118	61	32	30	0	16
CH32	A1.2	001_500ug CBD	52	45	26	26	27	27	22	25	24	57	72	43	38	18	32	0	0	0	0	0	0	1	0	5	2	2	17	5	1	1	3	0	27	12	0	5	1	0	1	2	0	80	114	63	5	46	11
CH33	A1.3	001_500ug CBD	26	25	27	24	33	32	20	27	51	56	23	17	34	23	68	35	50	26	74	42	67	15	62	38	21	29	21	12	16	11	31	14	32	34	14	7	1	2	0	0	9	0	13	10	4	0	0
CH34	A1.4	001_500ug CBD	20	15	7	8	8	6	9	10	9	12	21	8	8	10	17	30	19	20	28	7	6	14	4	7	8	9	16	4	8	5	7	9	5	12	2	6	0	3	0	1	0	0	3	13	12	7	14
CH35	A1.5	001_500ug CBD	17	24	13	7	3	14	6	17	4	12	25	12	15	24	20	23	12	12	19	14	2	15	0	0	4	37	18	5	4	15	11	12	8	16	11	31	0	7	0	5	4	0	1	6	48	21	14
CH38	B1.2	000_emulsion control	54	27	0	5	1	6	1	0	1	0	0	0	0	0	0	5	68	62	45	51	18	42	25	26	10	44	6	22	7	32	1	27	1	6	0	0	0	0	12	5	7	2	14	2	3	0	1
CH39	B1.3	000_emulsion control	56	41	28	42	41	33	43	52	67	90	92	105	100	87	106	89	75	56	71	52	47	41	39	51	34	12	12	14	37	12	3	6	0	2	0	3	1	3	0	8	9	2	0	6	7	1	11
CH40	B1.4	000_emulsion control	57	58	40	38	48	44	67	68	86	93	124	116	115	116	100	104	91	97	88	46	41	25	26	18	18	17	9	9	4	7	8	5	2	3	4	0	2	1	1	7	5	3	1	9	4	23	18
CH41	B1.5	000_emulsion control	77	71	67	70	95	87	76	98	99	104	92	75	103	56	73	93	80	40	45	73	48	33	43	49	54	36	22	18	8	6	15	14	0	0	10	0	0	5	10	0	6	10	24	45	26	41	54
CH44	C1.2	003_1000ug CBD	34	0	0	0	0	0	0	0	0	0	0	0	0	0	0	0	0	0	0	0	0	0	0	0	0	0	0	0	0	0	0	0	0	0	0	0	0	0	0	0	0	0	0	0	0	0	0
CH45	C1.3	003_1000ug CBD	30	6	0	8	8	3	11	6	4	1	3	5	1	1	12	16	11	16	2	12	14	18	8	13	3	8	25	17	7	4	15	7	19	8	12	11	11	20	8	3	4	11	2	4	6	0	3
CH46	C1.4	003_1000ug CBD	31	12	14	26	20	12	21	3	4	1	7	12	4	10	20	17	10	15	7	13	3	15	25	14	27	30	9	30	33	14	3	7	5	37	2	8	24	12	9	27	74	57	24	2	25	3	3
CH47	C1.5	003_1000ug CBD	27	27	25	35	52	27	10	10	5	15	19	24	6	9	30	48	67	33	14	24	11	23	23	27	17	6	38	29	19	76	10	100	153	12	50	58	13	11	28	109	87	46	22	36	53	42	63
CH48	A1.6	001_500ug CBD	46	30	61	24	58	21	24	38	40	53	49	43	75	55	74	72	65	71	36	99	59	60	105	84	116	81	109	105	18	32	36	36	27	6	29	11	0	8	2	7	4	3	21	2	46	38	5
CH49	A1.7	001_500ug CBD	26	7	10	29	12	8	20	10	14	9	22	27	21	36	13	38	31	38	25	16	23	24	9	22	15	25	17	14	14	18	6	14	21	4	38	28	8	0	0	3	4	1	4	9	2	12	2
CH50	A1.8	001_500ug CBD	31	18	8	25	30	34	49	17	25	28	51	50	43	27	22	32	38	20	58	18	29	17	9	23	28	25	31	32	9	14	13	23	9	0	7	4	7	5	4	0	0	9	8	7	5	0	2
CH51	A1.9	001_500ug CBD	32	28	19	22	28	24	31	24	22	36	44	49	49	41	24	27	28	26	13	32	43	33	50	34	8	22	23	18	14	46	21	8	15	22	36	26	3	5	6	5	3	0	5	11	10	15	17
CH52	A1.10	001_500ug CBD	15	17	8	18	20	13	17	18	49	60	30	38	43	34	42	44	35	44	74	39	52	53	45	22	24	37	39	21	18	21	26	15	26	37	43	80	72	102	129	104	83	76	75	75	80	73	98
CH54	B1.6	000_emulsion control	53	43	45	26	24	8	11	8	1	12	3	4	1	3	0	0	1	0	0	0	0	0	0	0	0	0	0	0	0	0	0	0	0	0	0	0	0	0	0	0	0	0	0	0	0	0	0
CH55	B1.7	000_emulsion control	61	65	38	49	38	30	49	73	98	115	98	104	106	117	109	75	79	96	81	58	29	44	33	15	13	11	38	38	5	3	12	3	2	0	0	0	8	0	0	8	1	12	4	18	59	27	19
CH56	B1.8	000_emulsion control	48	62	66	51	40	51	84	84	79	111	96	105	82	105	56	70	59	61	56	40	38	52	29	62	25	15	15	19	133	101	1	4	1	5	7	0	11	3	4	3	2	1	9	28	8	38	29
CH57	B1.9	000_emulsion control	49	65	69	96	93	87	91	81	82	98	74	62	58	75	89	78	59	56	31	27	41	21	33	33	51	62	49	35	8	18	27	8	6	8	6	2	24	5	3	6	2	7	11	33	50	71	75
CH59	C1.6	003_1000ug CBD	40	13	47	24	36	13	45	25	25	22	25	44	101	116	74	65	138	90	126	97	106	75	89	83	40	43	36	79	17	17	47	36	77	72	22	87	92	66	36	53	39	40	63	65	60	60	69
CH60	C1.7	003_1000ug CBD	30	30	28	28	25	21	22	3	7	27	39	30	52	9	10	31	17	23	19	18	10	59	20	19	22	35	31	17	35	12	5	12	12	17	22	48	15	18	8	3	20	2	38	9	11	12	22
CH61	C1.8	003_1000ug CBD	16	10	7	9	20	13	6	5	2	0	2	2	5	14	2	17	4	16	12	20	8	17	14	22	16	4	9	1	10	12	8	9	5	9	9	28	9	11	21	13	5	6	7	3	6	10	0
CH62	C1.9	003_1000ug CBD	35	16	18	14	31	16	6	3	12	1	3	1	6	0	17	14	25	7	15	15	14	6	5	5	18	5	6	17	20	25	13	18	12	3	19	16	9	10	24	24	19	26	8	13	9	18	19
CH63	C1.10	003_1000ug CBD	33	27	19	14	10	12	12	4	6	18	17	12	8	7	15	14	22	3	10	12	25	8	37	20	21	26	18	16	13	14	16	28	15	7	5	16	19	6	11	36	56	34	19	49	20	9	8
CH64	A1.11	001_500ug CBD	42	23	56	64	74	76	38	33	84	14	10	15	21	18	13	101	92	29	64	75	78	73	82	69	80	32	64	84	85	92	89	111	214	236	201	164	113	99	106	165	116	148	143	102	107	85	143
CH65	A1.12	001_500ug CBD	35	16	31	20	24	19	21	20	16	16	35	51	40	48	63	60	72	38	39	73	83	47	9	19	5	7	16	32	18	10	41	84	39	33	29	17	11	1	0	5	2	7	21	6	15	54	53
CH66	A1.13	001_500ug CBD	36	22	11	15	28	15	16	23	35	51	22	47	50	39	21	24	33	37	19	20	9	12	11	30	41	24	9	9	18	10	33	21	12	69	15	12	35	26	2	4	0	0	4	9	7	9	9
CH67	A1.14	001_500ug CBD	50	34	27	42	38	25	24	27	34	53	79	44	41	48	71	38	35	40	52	52	37	54	43	32	6	23	32	50	44	65	42	93	53	62	58	118	98	54	59	29	45	105	46	95	140	58	102
CH70	B1.10	000_emulsion control	28	0	0	0	0	0	0	0	0	0	0	0	0	0	0	0	0	0	0	0	0	0	0	0	0	0	0	0	0	3	0	0	0	0	0	0	0	0	0	0	0	0	0	0	0	0	0
CH71	B1.11	000_emulsion control	55	70	54	46	44	38	56	79	91	110	85	89	92	89	96	93	63	57	42	45	17	34	43	23	16	22	28	23	26	17	7	7	0	6	0	0	2	0	1	12	13	2	18	14	15	30	33
CH72	B1.12	000_emulsion control	52	65	53	57	63	53	68	65	73	71	81	66	58	68	49	41	61	35	39	9	14	12	22	10	17	19	28	16	34	12	3	0	4	6	0	0	0	0	0	8	8	2	18	19	25	30	51
CH73	B1.13	000_emulsion control	38	75	102	83	85	79	96	98	116	85	73	88	67	54	63	56	65	74	40	54	61	131	105	56	80	82	70	103	132	143	165	200	190	209	202	205	184	110	144	157	199	223	236	238	233	224	230
CH76	C1.11	003_1000ug CBD	35	3	8	5	17	30	22	10	28	44	28	10	19	63	13	51	40	69	32	51	47	49	53	74	94	44	34	23	46	42	25	15	9	12	25	4	18	3	7	26	25	17	40	73	37	60	58
CH77	C1.12	003_1000ug CBD	37	27	7	2	45	11	9	9	20	13	7	32	8	22	24	35	32	11	12	23	48	37	24	33	29	30	37	26	42	21	31	17	14	53	48	37	21	32	28	33	24	11	26	40	14	5	14
CH78	C1.13	003_1000ug CBD	27	16	14	15	31	23	19	35	27	32	17	2	7	23	25	40	21	15	18	50	22	19	39	49	62	37	33	48	15	33	31	32	22	11	39	56	33	35	50	52	13	22	16	20	0	9	14
CH79	C1.14	003_1000ug CBD	10	8	17	13	24	15	19	6	3	3	14	10	13	42	12	20	28	24	25	57	35	25	45	54	24	54	55	42	19	25	23	11	13	19	22	54	54	42	87	26	29	34	16	29	16	29	53
CH81	A1.15	001_500ug CBD	72	38	79	57	16	15	1	4	3	1	8	0	0	0	0	3	0	0	0	0	0	0	0	0	0	0	0	0	0	0	0	0	0	0	1	0	16	4	0	0	0	0	0	0	0	0	0
CH82	A1.16	001_500ug CBD	9	7	3	7	3	2	2	14	2	7	3	3	6	9	7	12	26	11	17	29	37	20	11	5	10	10	25	47	51	34	54	83	97	73	57	69	90	91	41	37	73	31	62	107	70	52	67
CH87	B1.14	000_emulsion control	52	57	49	28	63	71	75	66	107	100	107	76	78	70	76	71	63	67	50	16	35	40	54	72	75	84	85	96	140	152	130	103	82	79	51	25	13	27	2	14	61	15	62	95	47	47	45
CH88	B1.15	000_emulsion control	6	11	20	22	21	38	30	30	34	41	37	40	30	33	41	25	35	36	28	31	24	39	30	59	65	62	34	22	12	35	99	142	126	75	80	30	23	17	32	63	167	188	196	189	187	163	182
CH93	C1.15	003_1000ug CBD	39	27	45	35	31	37	26	21	17	55	44	6	21	17	38	34	66	36	30	49	69	28	53	74	40	26	27	57	51	44	56	37	45	53	51	19	56	58	57	64	3	9	50	90	114	60	70
CH94	C1.16	003_1000ug CBD	4	1	0	1	1	2	0	1	0	0	1	5	2	1	4	3	1	0	2	5	6	5	5	3	1	1	0	5	2	3	0	0	1	1	2	9	12	16	15	12	19	8	8	16	10	2	0
CH113	A2.0	002_750ug CBD	34	36	53	47	29	25	10	2	0	6	2	8	6	19	15	11	0	0	0	0	0	0	0	0	0	0	0	0	0	0	0	0	0	0	0	0	0	0	0	4	0	0	0	0	0	0	0
CH114	A2.1	002_750ug CBD	40	51	36	76	81	74	90	32	87	18	79	24	56	50	76	37	41	38	30	35	65	69	29	15	27	90	94	80	78	0	14	12	19	15	16	17	40	36	78	28	70	37	22	17	11	10	60
CH115	A2.2	002_750ug CBD	36	15	58	84	44	74	41	15	33	30	68	44	44	32	47	39	90	60	29	25	22	39	14	66	4	22	22	12	49	79	23	74	29	60	47	10	9	0	34	16	40	85	90	19	13	29	24
CH118	B2.0	001_500ug CBD	25	21	17	11	35	17	4	6	6	6	8	5	2	1	0	0	0	0	1	1	0	0	0	0	0	0	0	0	0	0	0	0	0	0	0	0	0	0	0	0	0	0	0	0	0	0	0
CH119	B2.1	001_500ug CBD	53	53	27	28	36	12	28	6	57	17	39	49	39	39	11	83	17	56	44	32	47	21	15	7	6	43	30	24	30	18	50	113	8	66	32	42	39	130	62	0	2	0	2	5	4	7	16
CH120	B2.2	001_500ug CBD	53	18	46	25	27	23	26	26	34	39	21	12	43	47	25	18	22	65	9	22	62	19	15	66	15	29	6	28	35	34	41	10	23	55	49	126	52	46	66	31	64	39	23	26	10	34	28
CH121	B2.3	001_500ug CBD	28	46	38	27	27	26	18	19	18	25	32	43	41	40	13	23	8	14	26	5	38	27	31	16	18	100	10	8	0	0	19	19	74	22	13	8	12	0	3	5	0	0	0	3	2	0	63
CH124	C2.0	000_emulsion control	26	15	2	1	0	0	1	0	0	0	0	0	0	0	0	0	0	0	0	0	0	0	0	0	0	0	0	0	0	0	0	0	0	0	0	0	0	0	0	21	18	12	9	14	3	10	9
CH125	C2.1	000_emulsion control	45	53	14	29	26	32	49	51	76	94	84	102	85	78	68	87	61	53	54	92	51	26	35	41	33	24	41	12	10	16	19	25	65	44	7	4	33	3	1	11	19	22	21	5	19	6	16
CH126	C2.2	000_emulsion control	27	43	43	49	56	53	36	59	70	70	106	71	68	79	67	71	66	66	39	66	43	29	19	22	27	26	45	17	14	1	6	1	4	5	7	0	4	0	0	0	5	13	5	18	13	16	35
CH128	A2.3	002_750ug CBD	37	41	12	17	16	3	12	11	9	9	38	10	36	33	39	68	44	42	84	41	19	41	38	76	39	19	23	37	102	46	72	45	118	118	59	21	49	38	5	13	17	26	0	5	0	21	62
CH129	A2.4	002_750ug CBD	39	7	16	25	30	11	7	16	20	18	11	14	4	27	10	23	38	23	36	22	24	23	8	21	24	35	12	9	28	25	14	14	42	66	11	32	2	5	21	6	0	0	0	22	3	8	5
CH130	A2.5	002_750ug CBD	48	23	37	33	65	11	12	12	8	27	61	22	13	47	50	13	32	15	24	33	10	46	55	42	7	6	19	19	30	30	45	47	51	31	17	12	25	32	11	60	30	19	5	24	20	18	0
CH131	A2.6	002_750ug CBD	27	7	19	21	30	42	37	3	21	22	26	35	40	38	34	57	27	44	50	22	67	17	34	25	29	27	23	48	34	68	25	10	6	35	62	56	18	2	0	0	0	3	3	2	2	4	7
CH132	A2.7	002_750ug CBD	8	4	1	12	4	1	10	3	0	2	6	1	0	0	3	1	1	4	3	1	0	4	1	1	2	2	0	2	2	1	3	0	0	0	0	0	0	1	0	0	0	0	0	1	0	0	1
CH134	B2.4	001_500ug CBD	36	36	20	40	24	17	15	12	8	17	46	50	44	34	15	56	83	66	81	94	74	64	84	97	43	14	34	35	54	87	25	45	105	56	70	31	56	0	18	0	10	38	58	75	107	59	75
CH135	B2.5	001_500ug CBD	56	20	19	8	32	12	4	12	19	5	23	24	14	12	42	44	32	28	44	14	43	18	17	32	23	20	20	12	3	16	21	20	2	8	12	18	3	4	0	26	7	8	13	5	5	6	9
CH136	B2.6	001_500ug CBD	22	13	24	19	17	35	24	16	0	11	22	20	26	32	12	44	11	5	6	19	29	20	22	21	27	69	45	41	68	17	66	35	74	49	42	68	67	58	94	13	7	12	20	34	11	21	13
CH137	B2.7	001_500ug CBD	38	30	5	38	51	33	19	8	16	34	19	40	23	58	79	51	31	27	36	62	39	5	19	29	61	25	5	33	73	39	16	8	37	21	12	0	5	40	38	7	7	1	15	17	7	24	7
CH139	C2.3	000_emulsion control	32	6	21	13	15	23	45	50	65	75	76	80	73	100	88	100	96	111	84	60	64	63	84	108	58	59	104	45	28	24	17	14	18	16	9	12	5	0	5	0	20	4	16	28	6	58	26
CH140	C2.4	000_emulsion control	52	29	23	18	34	42	53	57	60	75	93	71	78	102	82	75	107	80	87	40	42	57	38	45	35	18	20	24	14	12	5	11	10	1	0	4	8	0	6	9	11	0	0	13	10	9	7
CH141	C2.5	000_emulsion control	47	38	22	29	23	38	42	54	83	96	77	92	87	104	99	83	84	93	79	65	28	33	25	41	22	26	18	16	18	3	9	9	3	11	0	0	0	0	1	1	0	5	10	24	17	14	13
CH142	C2.6	000_emulsion control	65	81	56	84	75	53	73	81	90	93	91	85	108	95	73	84	69	63	53	44	64	43	49	30	26	16	22	9	20	4	27	24	8	3	9	5	0	2	0	1	0	2	1	10	7	20	23
CH143	C2.7	000_emulsion control	27	53	76	72	61	84	73	79	85	69	82	46	75	71	104	69	72	55	57	47	53	40	32	36	44	40	21	22	14	12	12	13	5	9	0	1	2	1	2	17	1	6	11	11	25	50	87
CH144	A2.8	002_750ug CBD	18	19	7	25	17	27	20	0	4	12	15	15	9	12	28	51	42	41	50	57	48	36	23	21	20	32	55	26	36	7	18	34	43	39	13	35	51	59	77	12	17	5	0	1	4	16	23
CH145	A2.9	002_750ug CBD	64	19	43	20	29	18	23	30	39	18	24	48	62	39	60	37	20	28	57	37	30	53	42	26	40	42	72	41	26	20	31	27	50	47	28	80	46	24	43	7	41	74	61	34	9	2	7
CH146	A2.10	002_750ug CBD	37	24	17	11	23	22	20	8	3	27	25	11	20	12	22	26	11	14	10	19	14	24	16	23	10	52	43	27	32	38	17	16	15	27	19	16	7	9	17	6	5	9	6	2	0	7	38
CH147	A2.11	002_750ug CBD	36	10	6	20	14	17	14	6	5	0	6	11	18	21	30	23	26	33	34	30	26	15	44	47	39	19	3	18	19	10	23	22	29	33	37	22	15	37	19	16	8	26	29	40	5	12	15
CH148	A2.12	002_750ug CBD	12	9	9	3	9	8	1	1	2	4	1	1	3	1	1	1	1	1	5	9	1	2	8	3	7	7	4	5	12	3	4	9	13	11	7	0	2	2	6	1	2	1	1	1	0	5	11
CH150	B2.8	001_500ug CBD	48	47	28	73	59	61	40	16	21	22	58	68	25	77	66	84	105	19	37	52	99	60	80	18	50	98	71	88	75	64	98	63	17	73	61	50	103	120	144	42	46	16	45	35	19	33	29
CH151	B2.9	001_500ug CBD	49	18	5	24	29	23	16	16	34	34	40	58	17	25	30	56	48	30	50	23	34	28	18	20	17	36	21	17	54	98	39	29	28	41	43	10	24	36	15	8	19	11	21	14	57	153	244
CH152	B2.10	001_500ug CBD	47	25	15	14	30	17	38	62	22	29	30	29	30	23	37	28	39	50	31	26	22	26	23	28	17	43	46	22	8	16	24	41	25	28	29	7	23	25	48	33	21	1	6	7	15	14	40
CH153	B2.11	001_500ug CBD	34	32	32	30	36	21	16	4	15	37	22	65	73	30	31	27	45	23	60	32	24	39	33	39	64	41	17	33	15	19	16	34	42	56	35	57	82	49	76	71	59	53	29	37	49	30	13
CH155	C2.8	000_emulsion control	25	30	23	7	18	43	54	63	70	94	89	83	107	110	109	76	109	118	56	99	121	167	146	112	135	48	60	22	13	22	93	59	22	9	12	1	5	0	2	7	3	9	4	11	24	25	29
CH156	C2.9	000_emulsion control	42	35	12	9	13	20	27	36	51	75	67	50	78	63	81	70	71	64	45	44	51	29	33	34	20	26	12	9	15	6	7	11	10	2	6	1	4	10	9	6	28	52	82	159	130	28	13
CH157	C2.10	000_emulsion control	81	89	42	16	51	41	63	65	68	96	87	113	87	103	90	114	64	99	67	69	38	24	39	21	25	23	37	9	2	6	2	13	7	0	0	0	0	0	0	4	6	7	2	4	7	10	34
CH158	C2.11	000_emulsion control	65	96	80	71	78	74	78	91	97	104	97	104	94	82	101	101	51	62	70	94	36	58	41	14	24	29	24	18	11	1	2	5	15	16	15	0	0	0	0	0	3	3	3	8	14	28	36
CH159	C2.12	000_emulsion control	50	96	132	118	109	140	128	118	125	110	108	99	112	99	124	155	91	90	75	51	77	108	96	125	138	95	72	94	121	145	136	92	88	90	105	10	30	45	13	6	15	30	78	147	163	166	204
CH160	A2.13	002_750ug CBD	59	20	29	72	44	22	18	48	66	54	60	40	110	93	88	74	73	29	36	35	70	88	86	62	79	48	22	125	78	58	32	15	43	98	108	129	144	99	41	54	74	23	40	12	26	36	69
CH161	A2.14	002_750ug CBD	43	11	16	23	35	9	4	10	14	11	36	2	25	23	28	33	54	40	36	53	16	35	38	40	14	51	11	19	23	6	21	28	8	3	10	20	24	25	43	4	28	32	35	6	14	25	36
CH162	A2.15	002_750ug CBD	41	14	20	34	34	23	34	14	21	25	22	57	37	94	45	47	47	35	43	49	44	69	59	37	25	52	77	29	18	11	30	53	48	28	94	7	21	7	38	0	23	0	0	2	3	16	12
CH163	A2.16	002_750ug CBD	47	61	22	38	11	9	20	14	30	39	17	42	21	20	53	44	44	91	70	38	46	68	149	33	26	22	56	22	82	71	31	25	46	4	17	23	38	77	61	48	14	23	18	30	60	123	82
CH166	B2.12	001_500ug CBD	40	56	13	25	44	27	35	37	40	17	47	59	69	53	91	67	123	88	152	95	133	97	108	103	117	120	207	116	107	89	161	137	58	93	85	132	225	162	96	124	54	105	54	100	134	95	59
CH167	B2.13	001_500ug CBD	56	42	31	36	27	38	13	12	19	10	20	13	16	43	43	21	26	38	33	58	46	62	28	26	29	31	30	55	13	20	15	25	27	45	41	42	33	29	7	3	24	46	40	59	85	79	35
CH168	B2.14	001_500ug CBD	38	10	20	19	25	18	12	15	16	12	28	27	14	34	40	15	45	31	33	22	58	38	53	66	23	25	20	10	31	13	19	40	64	87	76	45	35	34	33	34	9	29	44	30	22	57	13
CH169	B2.15	001_500ug CBD	26	18	12	29	20	15	14	10	19	12	27	37	38	22	27	51	28	46	66	42	14	45	68	63	66	45	70	54	113	74	37	30	84	47	54	22	16	42	82	62	39	38	72	39	63	70	84
CH172	C2.13	000_emulsion control	53	52	25	15	26	35	30	76	64	96	63	73	100	91	84	119	80	61	104	175	156	86	41	23	39	22	20	22	27	18	16	19	38	28	21	22	51	47	29	21	13	34	25	51	45	88	43
CH173	C2.14	000_emulsion control	61	88	39	26	64	33	43	82	118	80	98	76	101	94	80	64	65	44	61	23	26	32	35	18	13	15	19	14	16	13	5	5	2	4	3	0	5	0	4	14	11	14	17	10	7	6	18
CH174	C2.15	000_emulsion control	21	40	33	30	33	51	40	66	49	57	45	37	55	48	43	60	38	41	37	31	18	13	17	18	12	13	14	20	10	21	13	10	4	5	11	2	0	2	0	0	0	6	9	15	14	22	50
CH175	C2.16	000_emulsion control	27	30	57	56	45	52	86	72	75	65	71	59	69	72	70	66	44	30	65	44	52	48	31	42	47	75	51	64	71	105	85	122	121	139	145	135	123	79	109	79	103	93	151	170	167	180	167
CH208	A3.0	003_1000ug CBD	30	2	0	0	0	0	1	0	0	0	0	0	34	15	47	85	54	30	46	45	52	42	61	26	21	33	14	20	35	73	39	13	34	28	13	12	11	5	76	24	2	8	3	12	2	2	0
CH209	A3.1	003_1000ug CBD	23	14	17	12	16	12	9	8	1	19	4	10	14	15	19	13	10	7	10	19	11	30	41	30	0	31	23	12	6	6	6	15	29	41	10	12	14	13	48	107	34	28	7	1	12	7	0
CH210	A3.2	003_1000ug CBD	41	16	23	11	8	25	19	0	1	0	24	16	11	21	23	27	5	3	8	10	15	6	15	12	7	38	11	9	8	4	0	26	6	8	3	8	15	21	9	9	6	11	8	36	2	2	12
CH211	A3.3	003_1000ug CBD	42	28	38	66	35	34	20	23	2	22	54	21	10	17	83	68	47	25	62	23	47	45	47	31	36	24	58	26	43	29	33	67	5	17	20	22	41	103	53	104	65	92	135	134	106	60	74
CH214	B3.0	002_750ug CBD	15	8	33	41	28	23	34	27	51	23	31	11	63	29	56	16	80	55	51	53	130	139	70	81	115	43	60	103	76	60	39	47	101	68	35	128	109	98	77	165	23	4	18	28	27	3	3
CH215	B3.1	002_750ug CBD	53	16	49	13	33	15	35	9	4	11	12	8	28	16	29	25	11	10	21	20	49	31	8	20	26	8	12	35	12	9	39	13	14	5	24	23	0	10	16	25	0	0	0	23	9	0	6
CH216	B3.2	002_750ug CBD	47	16	35	40	55	46	23	24	18	5	56	16	20	18	3	30	14	45	9	20	11	52	6	10	0	0	3	10	7	1	5	15	30	7	0	11	29	3	19	25	2	0	1	5	2	44	34
CH217	B3.3	002_750ug CBD	32	7	49	15	41	43	53	30	34	10	30	20	18	34	12	22	15	14	15	22	40	134	110	9	15	2	51	87	84	14	64	43	10	21	14	27	10	13	14	13	44	73	139	141	89	109	142
CH220	C3.0	001_500ug CBD	68	46	41	27	33	18	23	38	24	37	43	18	28	58	20	6	70	75	58	19	64	64	45	67	106	33	10	37	7	14	31	75	152	25	149	106	71	112	10	9	3	5	5	3	0	2	4
CH221	C3.1	001_500ug CBD	56	26	35	13	28	12	6	4	37	14	46	4	42	23	22	31	12	62	47	49	41	49	38	28	50	25	38	60	47	31	0	4	19	8	13	55	61	71	56	11	2	9	3	0	7	0	14
CH222	C3.2	001_500ug CBD	40	50	25	7	31	22	17	9	0	5	22	13	24	39	14	30	45	54	68	42	25	20	36	40	33	30	68	59	46	33	24	5	24	31	32	36	45	6	33	0	16	25	53	40	38	28	77
CH223	C3.3	001_500ug CBD	69	39	83	49	43	39	38	19	59	57	139	122	62	48	72	42	65	57	71	36	42	40	48	84	77	43	12	15	30	28	28	38	65	28	18	17	84	143	86	81	80	79	20	2	17	10	21
CH224	A3.4	003_1000ug CBD	29	23	44	35	91	39	17	8	16	31	18	33	15	22	21	10	53	65	51	56	34	83	68	56	71	52	25	6	27	45	13	8	4	52	82	106	105	97	5	64	35	1	47	66	40	33	1
CH225	A3.5	003_1000ug CBD	42	19	16	30	10	34	28	28	11	16	64	26	37	10	58	79	59	19	11	30	30	34	20	39	24	41	38	14	12	6	20	17	23	59	37	16	15	43	9	8	17	1	3	14	8	27	7
CH226	A3.6	003_1000ug CBD	36	18	19	35	50	41	17	6	29	4	4	17	50	18	26	34	37	9	14	20	27	5	8	2	50	84	30	42	12	11	30	12	15	37	7	1	19	14	23	4	33	53	70	7	12	1	2
CH227	A3.7	003_1000ug CBD	17	3	1	8	15	14	15	4	3	6	3	6	8	4	18	5	21	10	8	7	8	15	16	7	9	20	19	18	22	4	3	0	7	8	4	11	18	17	11	6	9	2	0	2	3	2	4
CH228	A3.8	003_1000ug CBD	22	5	12	13	14	8	4	9	1	6	2	10	12	12	2	5	13	9	9	11	14	10	27	16	4	5	21	13	16	10	22	12	11	27	16	22	23	35	24	9	10	7	7	4	10	9	4
CH230	B3.4	002_750ug CBD	47	30	36	43	40	47	6	21	29	36	19	22	8	21	50	38	39	61	20	47	58	69	45	103	54	29	61	24	41	6	30	75	67	24	59	89	51	38	16	65	29	4	0	33	15	7	16
CH231	B3.5	002_750ug CBD	29	12	20	13	23	6	11	18	9	8	14	10	11	21	30	29	19	20	9	32	30	28	11	16	36	69	3	7	2	8	7	29	13	10	5	9	20	27	8	0	0	17	5	9	5	7	0
CH232	B3.6	002_750ug CBD	50	5	9	19	35	15	26	15	10	28	28	23	37	22	9	46	20	42	27	16	5	12	40	7	17	29	60	23	35	36	46	41	86	108	30	46	17	37	45	90	70	13	3	4	10	33	78
CH233	B3.7	002_750ug CBD	40	30	12	27	43	23	47	31	19	0	33	43	24	66	23	24	56	46	26	15	20	38	20	14	17	19	66	65	28	42	12	9	11	13	40	59	59	66	71	68	80	86	70	5	0	4	6
CH235	C3.4	001_500ug CBD	54	44	34	49	15	35	13	17	8	20	41	57	52	65	96	56	92	99	72	64	84	74	108	81	85	45	70	48	57	67	66	69	78	39	4	5	24	7	6	0	0	23	26	8	3	9	24
CH236	C3.5	001_500ug CBD	35	16	38	29	49	26	17	19	24	21	30	44	35	19	58	48	49	34	38	42	63	18	86	63	53	41	49	51	26	43	38	93	71	85	14	46	28	9	3	7	0	0	0	3	6	66	16
CH237	C3.6	001_500ug CBD	38	26	22	22	13	4	16	5	16	15	18	15	18	27	23	41	35	33	28	15	36	20	21	17	28	13	9	20	37	5	8	10	23	35	5	30	19	26	6	28	0	1	2	4	5	13	15
CH238	C3.7	001_500ug CBD	56	48	19	32	12	16	15	17	16	12	24	41	42	50	23	60	52	52	48	51	61	45	36	25	12	11	21	45	23	17	33	18	26	38	35	53	15	20	25	30	27	8	30	39	15	26	30
CH239	C3.8	001_500ug CBD	39	26	18	34	35	30	16	51	28	15	27	51	32	15	39	39	54	17	37	79	61	32	49	53	26	22	27	37	36	6	53	46	40	63	57	50	32	4	6	1	27	31	10	10	2	28	59
CH240	A3.9	003_1000ug CBD	48	35	9	22	40	14	6	17	26	32	19	33	33	20	47	77	41	33	69	49	45	60	100	47	90	78	71	64	31	30	42	34	52	72	67	150	148	185	219	194	194	207	192	159	176	222	247
CH241	A3.10	003_1000ug CBD	32	16	7	5	14	5	13	7	3	9	6	6	22	37	19	33	52	54	23	20	42	20	49	43	15	37	24	39	15	48	28	15	20	4	18	23	26	7	7	7	3	3	7	12	11	0	10
CH242	A3.11	003_1000ug CBD	15	5	3	1	11	0	7	3	3	10	3	11	14	10	14	7	16	2	12	7	8	9	8	7	5	6	3	4	23	14	2	8	6	9	1	2	9	11	7	10	5	2	1	0	2	4	11
CH243	A3.12	003_1000ug CBD	32	22	6	18	41	22	18	12	11	10	13	14	2	15	24	10	13	28	17	33	67	18	11	7	36	25	28	36	38	12	19	12	23	28	49	39	23	17	77	70	104	27	14	23	18	1	5
CH244	A3.13	003_1000ug CBD	2	1	0	2	0	1	0	0	0	1	1	0	0	1	0	1	4	1	1	1	0	2	1	1	2	2	4	1	2	2	2	3	3	1	3	1	7	2	6	6	2	1	0	1	1	0	0
CH246	B3.8	002_750ug CBD	54	77	42	37	74	45	32	8	18	1	32	50	30	85	77	55	57	88	65	41	49	35	89	68	77	84	44	53	64	35	57	79	76	129	42	80	91	101	111	135	47	13	91	32	6	8	40
CH247	B3.9	002_750ug CBD	26	19	14	20	28	9	17	7	8	28	12	19	24	41	49	38	24	22	30	12	41	20	22	5	27	36	37	65	19	35	47	61	54	30	25	20	3	49	40	30	16	18	37	31	11	23	25
CH248	B3.10	002_750ug CBD	15	10	1	3	4	4	17	4	5	4	1	12	19	8	6	33	14	22	16	10	34	24	5	7	11	6	40	18	10	10	9	12	11	25	18	19	10	4	11	10	5	0	3	3	4	21	6
CH249	B3.11	002_750ug CBD	52	11	9	9	21	21	4	11	29	0	26	11	11	18	59	36	24	38	33	37	39	11	29	39	30	4	20	12	25	16	5	68	59	26	30	45	68	29	23	36	37	34	11	43	44	36	17
CH251	C3.9	001_500ug CBD	21	6	8	11	6	33	29	29	19	10	16	32	66	39	56	84	62	82	104	102	109	64	65	76	140	91	70	62	85	46	75	53	62	49	53	30	71	109	110	8	14	1	0	10	2	6	24
CH252	C3.10	001_500ug CBD	39	23	29	31	25	30	39	9	22	20	40	17	42	48	61	63	38	55	88	64	38	35	27	40	37	48	39	34	7	42	33	41	36	42	47	41	47	33	9	11	68	61	15	21	54	57	33
CH253	C3.11	001_500ug CBD	21	13	17	8	16	14	5	2	26	11	9	5	25	35	13	29	23	36	25	26	22	22	21	36	23	10	30	48	38	28	6	23	26	5	12	23	7	1	3	6	1	6	4	5	3	1	11
CH254	C3.12	001_500ug CBD	61	7	23	21	40	24	6	22	5	9	21	47	39	25	34	33	37	19	32	35	38	18	39	25	48	32	38	18	17	27	16	5	16	28	10	11	11	4	18	11	4	1	2	14	33	10	5
CH255	C3.13	001_500ug CBD	38	19	37	17	33	24	26	16	26	64	30	38	85	43	89	45	73	40	26	20	28	42	29	80	30	34	56	80	31	35	20	44	18	16	61	23	65	131	48	45	22	3	4	6	2	43	13
CH257	A3.14	003_1000ug CBD	64	40	32	21	31	7	31	33	11	16	24	20	33	50	29	59	46	56	49	17	19	12	11	40	39	20	1	29	33	16	31	40	18	7	3	20	51	10	11	26	18	10	49	82	12	2	19
CH258	A3.15	003_1000ug CBD	71	11	8	22	30	39	49	24	16	28	33	30	34	27	20	20	18	31	15	14	19	23	29	35	27	12	101	49	46	31	19	9	16	33	98	46	37	16	16	7	0	32	18	43	7	14	27
CH259	A3.16	003_1000ug CBD	48	20	40	42	39	41	31	68	74	47	87	79	40	63	35	38	77	61	74	107	69	148	40	29	92	92	73	71	44	27	106	60	128	144	120	62	90	130	95	131	153	126	138	159	171	142	175
CH262	B3.12	002_750ug CBD	42	46	42	78	75	30	18	7	53	24	3	15	36	92	72	66	33	41	62	75	106	88	56	61	54	107	155	144	140	104	76	14	16	28	29	21	42	17	14	13	24	56	50	101	92	108	60
CH263	B3.13	002_750ug CBD	44	16	30	37	28	22	35	52	16	6	18	31	44	87	59	63	52	63	58	46	26	56	107	11	8	28	17	80	32	17	42	24	41	15	31	18	59	85	79	73	113	159	159	110	72	30	3
CH264	B3.14	002_750ug CBD	39	36	18	27	32	21	23	27	51	28	14	29	49	47	47	17	48	53	54	53	34	52	109	63	12	35	39	50	4	37	60	19	40	31	24	9	12	34	20	5	18	40	10	19	11	78	96
CH265	B3.15	002_750ug CBD	13	9	6	16	17	6	12	12	9	19	28	10	6	20	30	29	47	63	38	20	24	10	13	16	44	19	36	11	28	35	48	29	38	55	58	39	79	65	75	55	58	33	85	91	87	80	146
CH268	C3.14	001_500ug CBD	51	43	46	31	25	30	47	68	27	26	92	96	53	53	51	51	70	71	86	71	40	99	74	112	63	23	49	58	115	102	100	148	174	172	96	153	184	201	140	88	140	61	76	25	19	121	156
CH269	C3.15	001_500ug CBD	33	27	38	31	11	18	34	19	41	33	41	25	41	74	59	24	60	61	42	49	51	31	29	15	24	33	27	10	18	64	74	46	25	65	99	30	129	134	93	97	13	30	19	33	11	15	10
CH270	C3.16	001_500ug CBD	56	23	32	40	31	32	34	7	18	32	47	20	25	29	49	83	72	90	30	41	25	17	36	88	65	60	86	41	26	2	7	69	111	169	13	40	25	48	61	54	32	88	18	13	8	6	44
CH289	A4.0	000_emulsion control	8	9	10	23	22	30	30	35	32	30	45	43	34	42	40	45	40	53	44	42	29	41	39	25	34	40	61	54	12	14	19	9	29	41	12	48	38	17	16	16	8	7	18	15	2	7	6
CH290	A4.1	000_emulsion control	54	74	77	81	67	69	89	70	93	88	84	73	74	73	84	106	90	98	53	59	87	89	111	170	100	40	62	30	103	154	128	116	15	41	5	2	4	5	19	21	14	39	28	23	17	10	13
CH295	B4.0	003_1000ug CBD	33	17	21	44	57	32	46	15	11	15	22	7	22	38	38	17	13	42	30	50	88	90	84	38	31	79	63	70	7	52	16	86	64	21	29	53	29	21	10	7	16	82	94	85	50	33	65
CH296	B4.1	003_1000ug CBD	99	72	82	74	65	14	95	42	20	55	3	47	63	23	18	54	42	28	49	20	47	37	13	22	5	42	57	71	22	50	97	3	35	59	30	18	63	64	5	3	7	4	0	7	6	8	3
CH301	C4.0	002_750ug CBD	22	6	10	9	28	19	17	6	32	7	7	29	22	8	11	10	15	20	33	26	50	47	27	27	10	45	54	66	32	6	7	11	7	24	24	88	3	25	4	15	5	0	5	0	0	1	3
CH302	C4.1	002_750ug CBD	22	16	21	7	13	10	6	0	5	6	21	12	3	8	12	7	21	17	10	8	36	35	19	20	12	13	11	6	23	6	32	14	37	37	30	55	4	2	9	15	15	21	31	58	79	107	101
CH304	A4.2	000_emulsion control	35	41	15	29	37	47	62	58	84	74	72	96	79	95	95	83	79	75	74	95	155	104	38	29	28	24	26	89	174	46	14	9	15	6	0	18	8	2	4	11	6	14	13	30	14	9	22
CH305	A4.3	000_emulsion control	60	39	22	32	36	47	66	67	69	78	76	71	67	80	74	96	80	62	57	41	62	31	37	29	23	15	18	5	2	18	10	1	0	0	0	7	0	3	4	7	9	19	19	12	17	25	14
CH306	A4.4	000_emulsion control	48	48	24	47	31	41	47	56	54	57	62	79	68	59	62	44	48	31	60	31	35	32	23	23	14	18	10	16	9	4	2	1	2	0	2	0	1	3	0	4	5	12	9	9	35	42	21
CH307	A4.5	000_emulsion control	42	80	102	87	99	80	110	89	94	94	85	89	98	88	78	91	74	80	73	80	63	59	94	74	67	100	92	31	35	31	55	58	28	8	5	1	2	0	18	13	11	21	29	45	57	93	75
CH310	B4.2	003_1000ug CBD	44	17	46	44	53	54	15	29	24	37	59	29	3	39	55	22	72	7	24	54	21	79	93	81	61	39	46	56	91	97	20	27	11	71	113	76	31	48	34	84	49	17	17	61	59	0	1
CH311	B4.3	003_1000ug CBD	45	18	40	34	34	15	7	10	12	3	0	50	25	40	45	28	66	8	7	30	21	40	3	17	30	14	8	2	9	4	33	9	22	18	22	10	32	25	40	23	17	3	7	6	0	6	11
CH312	B4.4	003_1000ug CBD	51	15	11	3	31	14	57	11	13	2	28	40	17	29	115	42	13	16	44	49	29	28	55	13	29	16	13	35	12	13	20	58	23	6	32	11	32	7	11	47	10	26	151	31	69	69	7
CH313	B4.5	003_1000ug CBD	42	17	46	65	82	37	24	63	45	5	14	18	53	39	70	93	82	46	37	22	27	69	95	60	47	41	70	111	30	100	153	106	96	108	183	65	29	138	182	159	130	99	80	92	80	13	6
CH316	C4.2	002_750ug CBD	38	32	26	32	30	24	17	6	19	14	38	58	7	31	32	31	53	39	50	43	71	55	50	72	63	30	34	26	23	52	126	99	50	63	55	59	11	5	42	19	59	23	2	22	5	18	78
CH317	C4.3	002_750ug CBD	17	4	7	13	24	9	6	4	2	6	2	5	18	7	12	28	28	13	24	20	31	32	20	17	8	23	28	23	24	10	15	11	4	6	31	13	25	13	11	12	4	29	33	3	41	18	5
CH318	C4.4	002_750ug CBD	31	19	11	10	22	21	16	3	1	3	13	17	12	15	21	0	24	3	45	19	28	12	14	18	4	5	16	8	20	15	24	10	13	19	9	15	8	19	0	0	10	5	14	11	0	0	1
CH319	C4.5	002_750ug CBD	34	75	35	37	42	64	10	9	0	6	8	79	38	46	58	44	28	43	22	25	66	74	84	29	49	33	81	31	4	33	25	27	12	14	18	26	27	110	13	24	95	149	69	8	0	3	5
CH320	A4.6	000_emulsion control	44	31	13	11	30	35	49	45	61	51	71	78	88	88	104	78	65	48	52	23	17	27	20	19	17	15	16	1	3	12	167	190	44	5	1	0	2	0	1	4	14	45	18	8	25	17	12
CH321	A4.7	000_emulsion control	51	34	34	18	9	21	45	57	64	77	84	92	78	99	99	100	79	81	61	52	36	24	28	13	13	9	12	4	0	3	4	11	4	4	2	0	0	12	6	8	13	15	10	18	17	29	22
CH322	A4.8	000_emulsion control	80	68	62	66	61	69	86	79	72	135	93	127	126	94	83	82	107	66	70	61	48	31	27	23	29	19	24	12	15	13	19	7	4	2	0	5	2	0	1	6	10	7	11	11	28	34	21
CH323	A4.9	000_emulsion control	43	79	64	80	70	69	86	81	78	63	67	66	85	73	81	82	66	76	49	44	53	48	40	44	79	76	45	41	18	20	24	25	0	5	2	0	2	0	1	40	9	10	27	72	77	108	140
CH324	A4.10	000_emulsion control	15	52	78	67	62	97	79	81	72	79	80	80	76	76	66	67	61	90	74	74	90	71	86	102	88	120	115	140	104	108	111	84	131	113	102	112	120	44	31	109	141	196	184	186	186	167	178
CH326	B4.6	003_1000ug CBD	36	20	22	20	15	19	14	8	18	4	10	16	24	39	7	46	22	23	59	33	51	30	34	59	33	29	62	18	25	20	53	74	13	11	25	62	60	61	19	12	41	98	99	56	18	83	22
CH327	B4.7	003_1000ug CBD	51	20	8	16	10	13	5	15	4	9	24	17	11	30	2	28	7	16	20	27	46	31	30	19	48	58	68	41	24	31	16	9	5	14	10	11	14	9	0	5	46	9	0	32	6	33	14
CH328	B4.8	003_1000ug CBD	44	23	18	13	25	19	14	8	8	6	15	17	13	22	23	26	17	18	28	12	24	30	41	22	42	14	21	16	17	29	14	9	25	21	52	16	63	46	67	59	9	20	73	0	7	4	0
CH329	B4.9	003_1000ug CBD	61	53	53	22	30	44	37	40	9	21	3	28	29	11	35	61	13	39	44	54	18	49	31	26	20	65	98	44	4	24	45	62	35	45	34	40	38	21	80	16	16	21	30	10	9	0	0
CH331	C4.6	002_750ug CBD	32	48	19	45	38	19	18	13	28	42	4	23	42	62	59	120	102	119	94	61	105	77	89	172	183	146	176	163	128	159	95	99	118	117	79	83	67	74	82	25	51	50	100	146	94	41	75
CH332	C4.7	002_750ug CBD	49	29	22	28	24	20	33	30	12	46	34	50	20	31	51	47	68	38	36	33	26	60	77	44	56	16	28	30	14	57	12	14	12	12	47	59	51	44	51	31	29	23	0	4	0	2	3
CH333	C4.8	002_750ug CBD	23	4	17	10	18	15	8	5	4	8	3	2	6	18	18	38	23	29	15	9	22	30	41	19	13	13	14	20	36	21	8	2	7	17	9	9	30	16	9	6	14	20	8	7	14	24	20
CH334	C4.9	002_750ug CBD	22	18	16	7	23	13	14	2	11	9	9	6	54	10	32	43	13	7	23	11	48	13	14	26	33	31	31	42	11	8	35	8	19	41	53	75	76	36	38	15	2	14	2	0	0	0	2
CH335	C4.10	002_750ug CBD	63	23	9	14	13	9	13	14	10	4	9	17	21	35	50	26	26	30	20	20	34	17	20	18	69	73	59	31	37	30	22	16	61	26	39	45	31	33	29	32	50	73	36	29	5	9	0
CH336	A4.11	000_emulsion control	60	29	23	26	24	52	74	63	71	91	89	92	95	96	98	64	73	46	67	65	44	99	36	55	51	39	46	46	80	21	5	46	22	0	0	1	0	5	10	5	37	4	3	6	1	23	8
CH337	A4.12	000_emulsion control	57	42	47	30	33	53	60	64	89	105	82	67	112	109	80	94	82	63	61	59	52	28	29	27	24	32	12	11	5	2	4	4	6	4	0	7	12	20	19	19	15	6	16	32	25	33	15
CH338	A4.13	000_emulsion control	66	73	62	58	59	84	88	89	105	83	103	94	97	83	97	78	82	51	59	46	28	42	30	30	9	15	10	15	17	1	8	2	5	0	0	2	1	8	4	11	8	5	6	21	31	35	56
CH339	A4.14	000_emulsion control	29	66	61	74	74	65	98	70	85	103	78	64	93	74	74	76	69	63	54	53	66	54	51	42	37	18	29	23	16	15	14	11	14	23	7	4	0	0	12	4	27	17	78	93	106	122	132
CH342	B4.10	003_1000ug CBD	29	50	33	40	35	16	11	33	28	20	7	7	0	0	7	31	20	26	25	50	30	95	56	16	28	8	9	17	40	27	42	37	52	101	73	18	53	63	18	2	16	6	23	0	3	0	0
CH343	B4.11	003_1000ug CBD	34	19	10	15	26	11	11	12	0	3	4	17	4	22	15	20	23	15	36	25	28	30	17	31	12	8	10	14	11	15	18	5	6	11	4	2	8	18	2	5	5	19	7	56	82	38	11
CH344	B4.12	003_1000ug CBD	37	19	26	4	15	13	16	32	16	6	4	30	19	15	33	20	28	13	17	15	44	15	17	14	36	10	42	29	2	34	5	14	16	27	2	1	6	3	13	29	50	2	14	24	10	0	26
CH345	B4.13	003_1000ug CBD	52	5	15	26	34	33	26	19	10	27	14	28	25	50	56	61	45	20	21	33	13	18	77	58	28	20	17	45	56	62	55	60	72	59	17	17	38	56	45	62	30	7	79	42	14	35	37
CH348	C4.11	002_750ug CBD	18	6	11	18	34	17	5	13	2	0	2	17	7	12	26	15	28	24	25	13	35	56	35	35	18	16	34	10	31	7	19	44	11	12	16	35	28	14	7	15	7	14	26	1	44	34	2
CH349	C4.12	002_750ug CBD	51	27	43	57	25	32	5	20	13	9	4	17	14	35	36	25	34	22	34	49	55	42	23	34	34	34	34	7	25	11	25	16	19	16	5	11	30	41	24	27	23	19	24	1	4	11	8
CH350	C4.13	002_750ug CBD	21	23	22	33	31	48	32	22	0	9	13	23	57	61	24	50	66	40	36	26	41	35	53	18	28	16	30	64	42	14	13	61	16	22	14	21	40	19	7	44	100	18	0	0	0	4	8
CH351	C4.14	002_750ug CBD	67	72	40	27	62	26	43	8	46	36	29	62	66	42	79	48	43	23	55	67	22	24	51	25	27	39	7	61	56	42	34	45	96	41	125	45	27	67	88	63	89	150	94	124	172	69	30
CH353	A4.15	000_emulsion control	37	41	42	43	53	57	74	77	72	80	68	81	98	96	74	73	79	28	37	44	39	56	19	15	49	33	27	12	38	64	27	10	4	6	3	26	4	13	8	21	11	4	7	34	15	34	18
CH354	A4.16	000_emulsion control	67	71	72	67	74	72	95	81	85	77	61	78	91	64	67	55	84	58	64	57	46	32	55	48	39	20	27	10	22	8	42	11	1	1	0	2	0	5	9	8	2	0	19	41	49	64	67
CH359	B4.14	003_1000ug CBD	34	23	11	19	41	38	19	2	18	23	48	13	26	42	62	41	10	39	30	54	40	39	34	75	9	2	3	46	2	10	3	27	22	39	21	10	8	5	20	14	17	34	0	5	6	0	17
CH360	B4.15	003_1000ug CBD	59	19	18	18	49	14	7	36	21	13	22	19	22	10	34	74	87	51	13	26	17	19	28	16	3	6	30	18	12	15	51	55	49	70	31	56	67	53	58	30	17	16	14	40	0	2	0
CH365	C4.15	002_750ug CBD	34	29	9	14	41	24	48	0	28	33	30	23	19	20	14	23	31	52	57	39	25	48	33	14	38	38	5	2	15	2	12	44	37	1	30	11	0	18	66	126	46	0	1	5	0	13	7
CH366	C4.16	002_750ug CBD	30	24	46	63	58	38	13	54	32	66	7	22	48	76	23	24	35	49	25	35	54	46	29	27	46	58	94	100	75	52	108	92	65	57	102	113	127	81	113	164	143	85	23	10	10	64	108
[truncated: 98 more columns]
